# Supplementary material
Source: PubMed Central journal article supplement (PMC10080636)
Supplement: media-1.pdf [file media-1.pdf]

### Vaccinia screen results summary.

**Converged** = TM-align & FATCAT agreement      **Excess Hits** = Large quantity of nonspec

**Proteins with <16 secondary structural motifs** (as determined by STRIDE) are highlighte

**%ID** was calculated based on a clustal omega alignment of the indicated uniprot identifi

**Some proteins with hits** have other hits that are extremely close to the annotated hit.

| Uniprot ID | OrfName  | pLDDT    | Length (AA) | ssMotifs | Converged | Excess Hits |
|------------|----------|----------|-------------|----------|-----------|-------------|
| P21113     | 7kDaAtIP | 68.74233 | 65          | 9        | N         |             |
| P20982     | A1       | 87.2308  | 150         | 22       | N         |             |
| P20642     | A10      | 77.11623 | 891         | 122      | N         |             |
| P20988     | A11      | 56.09341 | 318         | 25       | N         |             |
| P20989     | A12      | 62.00416 | 192         | 19       | N         |             |
| P20990     | A13      | 70.54972 | 70          | 4        | Y         |             |
| P20991     | A14      | 69.03298 | 90          | 2        | Y         | Y           |
| p0ck28     | A14p5    | 89.63571 | 53          | 2        | Y         | Y           |
| P20992     | A15      | 89.0949  | 94          | 15       | N         |             |
| P20993     | A16      | 81.98536 | 378         | 64       | N         |             |
| P68592     | A17      | 71.33835 | 203         | 22       | N         |             |
| p20534     | A18      | 86.7     | 493         | 74       | Y         |             |
| P20994     | A19      | 66.21313 | 77          | 15       | N         |             |
| P68318     | A2       | 77.66306 | 224         | 23       | N         |             |
| P20995     | A20      | 90.89355 | 426         | 58       | N         |             |
| P20996     | A21      | 85.92326 | 117         | 19       | N         |             |
| P20997     | A22      | 88.70113 | 176         | 23       | Y         |             |
| P20998     | A23      | 91.58571 | 382         | 60       | N         |             |
| P68694     | A24      | 91.11326 | 1164        | 213      | Y         |             |
| P21114     | A26      | 77.11563 | 322         | 34       | N         |             |
| p20535     | A27      | 78.05599 | 110         | 15       | Y         | Y           |
| P68632     | A28      | 81.33939 | 146         | 25       | N         |             |
| P21087     | A29      | 95.74789 | 305         | 51       | N         |             |
| p0ck20     | A2p5     | 69.70142 | 76          | 7        | N         |             |
| P20643     | A3       | 77.41739 | 644         | 97       | N         |             |
| P68595     | A30      | 78.62309 | 77          | 6        | Y         | Y           |
| P21096     | A31      | 80.39635 | 124         | 24       | N         |             |
| P68614     | A32      | 89.23297 | 270         | 42       | N         |             |
| P68616     | A33      | 74.04233 | 185         | 20       | Y         |             |
| P21057     | A34      | 90.60423 | 168         | 25       | Y         |             |
| P21058     | A35      | 88.00402 | 176         | 38       | N         |             |
| P68618     | A36      | 50.56892 | 221         | 18       | N         |             |
| P21060     | A37      | 87.80005 | 263         | 50       | N         |             |
| P21061     | A38      | 87.01837 | 277         | 36       | Y         |             |
| P21062     | A39      | 94.25722 | 403         | 85       | Y         |             |
| P20983     | A4       | 52.38249 | 281         | 28       | N         |             |
| P21063     | A40      | 66.87082 | 168         | 27       | Y         |             |
| P21064     | A41      | 89.74088 | 219         | 36       | N         |             |
| P68695     | A42      | 96.85205 | 133         | 25       | Y         |             |
| P21065     | A43      | 67.30829 | 194         | 24       | N         |             |
| P21097     | A44      | 95.30341 | 346         | 50       | Y         |             |

|        |       |          |     |     |   |   |
|--------|-------|----------|-----|-----|---|---|
| P21132 | A45   | 93.24252 | 125 | 22  | Y |   |
| P21066 | A46   | 71.92699 | 214 | 37  | N |   |
| P21067 | A47   | 75.06809 | 244 | 24  | Y |   |
| P68693 | A48   | 96.80824 | 204 | 27  | Y |   |
| P21068 | A49   | 91.49097 | 162 | 18  | N |   |
| P68610 | A5    | 76.81659 | 164 | 17  | N |   |
| p20492 | A50   | 90.70989 | 552 | 91  | Y |   |
| P21069 | A51   | 83.25104 | 334 | 56  | N |   |
| P21070 | A52   | 88.23601 | 190 | 17  | N |   |
| P21071 | A53   | 66.26683 | 103 | 20  | N |   |
| P68620 | A54   | 58.26713 | 90  | 5   | N | Y |
| P21073 | A55   | 87.92701 | 564 | 106 | Y |   |
| P20978 | A56   | 64.19411 | 315 | 35  | N |   |
| P21074 | A57   | 91.44574 | 151 | 20  | Y |   |
| P20985 | A6    | 91.34894 | 372 | 30  | N |   |
| p20635 | A7    | 84.76429 | 710 | 134 | N |   |
| P20986 | A8    | 79.39829 | 288 | 35  | N |   |
| P20987 | A9    | 65.02727 | 99  | 4   | Y |   |
| p20510 | AorfA | 60.24153 | 119 | 26  | n |   |
| p20511 | AorfB | 75.7881  | 86  | 1   | N | Y |
| p20512 | AorfC | 40.40304 | 128 | 12  | N |   |
| p20513 | AorfD | 49.14148 | 88  | 10  | Y |   |
| p20514 | AorfE | 42.43184 | 166 | 13  | N |   |
| p20515 | AorfF | 65.75827 | 75  | 12  | N |   |
| p20516 | AorfG | 59.32088 | 75  | 12  | N |   |
| p20517 | AorfH | 36.84384 | 128 | 13  | N |   |
| p20518 | AorfI | 55.97135 | 73  | 6   | Y | Y |
| p20519 | AorfJ | 48.84006 | 73  | 9   | N |   |
| p20520 | AorfK | 39.61527 | 70  | 11  | N |   |
| P68624 | AorfL | 54.92525 | 88  | 7   | Y |   |
| P68626 | AorfM | 58.78473 | 76  | 3   | Y | Y |
| p20523 | AorfN | 70.84175 | 70  | 1   | Y | Y |
| p20524 | AorfO | 40.7194  | 83  | 12  | N |   |
| p20525 | AorfP | 35.78624 | 89  | 14  | N |   |
| p20526 | AorfQ | 44.01094 | 77  | 7   | N |   |
| p20527 | AorfR | 61.5128  | 66  | 4   | Y | Y |
| P68628 | AorfS | 57.68266 | 67  | 11  | N |   |
| P68630 | AorfT | 52.02503 | 81  | 8   | N |   |
| p20530 | AorfU | 63.18684 | 72  | 3   | Y |   |
| p20505 | B1    | 95.97757 | 300 | 49  | Y |   |
| P68687 | B10   | 89.35938 | 166 | 40  | Y |   |
| P21007 | B11   | 69.78397 | 88  | 5   | Y |   |
| P21098 | B12   | 94.05945 | 283 | 42  | Y |   |
| P20841 | B13   | 87.6357  | 116 | 20  | Y |   |
| P20842 | B14   | 85.83112 | 222 | 34  | Y |   |
| P21089 | B15   | 93.55426 | 149 | 16  | Y |   |
| P21116 | B16   | 81.66437 | 30  | 1   | Y | Y |
| P21075 | B17   | 45.73089 | 340 | 61  | N |   |

|        |       |          |     |    |   |   |
|--------|-------|----------|-----|----|---|---|
| P21076 | B18   | 87.10394 | 574 | 87 | Y |   |
| P21077 | B19   | 93.77266 | 353 | 70 | N |   |
| P20999 | B2    | 91.24447 | 219 | 42 | N |   |
| P21078 | B20   | 49.01911 | 127 | 32 | N |   |
| P21099 | B21   | 64.58082 | 91  | 13 | Y |   |
| P21100 | B22   | 80.37308 | 181 | 21 | N |   |
| P21101 | B23   | 73.59851 | 386 | 63 | Y |   |
| P21102 | B24   | 81.14964 | 150 | 24 | Y |   |
| P21103 | B25   | 76.88415 | 259 | 33 | Y |   |
| P21104 | B26   | 67.3626  | 103 | 10 | Y |   |
| P21105 | B27   | 77.64603 | 113 | 15 | N |   |
| P21106 | B28   | 66.49728 | 122 | 24 | N |   |
| P21000 | B3    | 75.25853 | 124 | 20 | Y |   |
| P21001 | B4    | 74.79937 | 558 | 67 | N |   |
| P21115 | B5    | 85.58255 | 317 | 62 | N |   |
| P68443 | B6    | 80.86823 | 173 | 11 | Y |   |
| P68445 | B7    | 69.05378 | 182 | 32 | N |   |
| P21004 | B8    | 92.88861 | 272 | 45 | N |   |
| P21005 | B9    | 81.06937 | 77  | 9  | N |   |
| P68473 | BorfA | 46.51293 | 107 | 9  | N |   |
| p20542 | BorfB | 59.96655 | 66  | 9  | N |   |
| p20543 | BorfC | 36.44316 | 95  | 16 | N |   |
| P68475 | BorfD | 59.85997 | 71  | 5  | Y |   |
| P68477 | BorfE | 40.35753 | 91  | 13 | N |   |
| p20546 | BorfF | 50.60222 | 75  | 10 | N |   |
| p20547 | BorfG | 65.03501 | 91  | 2  | Y | Y |
| p20548 | BorfH | 43.73027 | 70  | 13 | N |   |
| p20549 | BorfI | 56.48816 | 67  | 10 | N |   |
| P21036 | C1    | 82.9674  | 224 | 20 | N |   |
| P21043 | C10   | 85.73095 | 331 | 53 | N |   |
| p20494 | c11   | 72.89068 | 142 | 24 | N |   |
| p20531 | C12   | 86.81473 | 353 | 57 | Y |   |
| P21044 | C13   | 64.16698 | 65  | 9  | N |   |
| P21045 | C14   | 81.71396 | 82  | 12 | N |   |
| P21037 | C2    | 85.64696 | 512 | 93 | Y |   |
| P21090 | C23   | 88.57905 | 244 | 40 | N |   |
| P68639 | C3    | 90.06353 | 263 | 56 | Y |   |
| P21038 | C4    | 81.96497 | 316 | 51 | N |   |
| P21039 | C5    | 89.17651 | 204 | 20 | Y |   |
| P21040 | C6    | 92.6986  | 151 | 16 | N |   |
| P68599 | C7    | 93.20519 | 150 | 29 | N |   |
| P21041 | C8    | 83.61364 | 184 | 28 | N |   |
| P21042 | C9    | 86.34565 | 634 | 85 | N |   |
| P21119 | CorfA | 50.19871 | 69  | 12 | N |   |
| P21120 | CorfB | 60.48731 | 72  | 6  | Y | Y |
| P21121 | CorfC | 71.63799 | 82  | 6  | Y | Y |
| P21122 | CorfD | 66.64765 | 70  | 3  | Y | Y |
| P21123 | CorfE | 84.93081 | 65  | 2  | Y | Y |

|        |       |          |      |     |   |   |
|--------|-------|----------|------|-----|---|---|
| P20979 | D1    | 90.48484 | 844  | 140 | N |   |
| P21012 | D10   | 94.27866 | 248  | 34  | N |   |
| P20637 | D11   | 91.01643 | 631  | 100 | Y |   |
| P20980 | D12   | 96.66837 | 287  | 34  | Y |   |
| P68441 | D13   | 95.34617 | 551  | 105 | N |   |
| P21008 | D2    | 84.00116 | 146  | 21  | N |   |
| P21009 | D3    | 87.61361 | 237  | 38  | N |   |
| p20536 | D4    | 96.6796  | 218  | 45  | Y |   |
| P21010 | D5    | 89.58724 | 785  | 147 | N |   |
| p20634 | D6    | 86.64423 | 637  | 112 | Y |   |
| P21034 | D7    | 91.4259  | 161  | 34  | Y |   |
| p20508 | D8    | 89.6699  | 304  | 45  | Y |   |
| P21011 | D9    | 91.26687 | 213  | 32  | N |   |
| p20550 | DorfA | 59.06901 | 84   | 4   | Y | Y |
| p20551 | DorfB | 52.66891 | 80   | 15  | N |   |
| p20552 | DorfC | 41.73074 | 69   | 10  | N |   |
| P68479 | DorfD | 55.33893 | 72   | 8   | N |   |
| P68481 | DorfE | 48.15648 | 80   | 17  | N |   |
| P68483 | DorfF | 65.46633 | 69   | 12  | Y |   |
| P68485 | DorfG | 55.62048 | 90   | 5   | Y | Y |
| P68487 | DorfH | 69.0556  | 61   | 1   | Y | Y |
| p20553 | DorfI | 72.22042 | 74   | 2   | N |   |
| P21079 | E1    | 94.07629 | 479  | 70  | N |   |
| P21050 | E10   | 95.66748 | 95   | 10  | Y |   |
| P68449 | E11   | 84.83324 | 129  | 22  | N |   |
| P21080 | E2    | 89.72825 | 737  | 95  | N |   |
| P21081 | E3    | 78.20192 | 190  | 27  | N |   |
| P21082 | E4    | 68.36226 | 259  | 29  | N |   |
| P21046 | E5    | 74.01381 | 341  | 34  | N |   |
| P21047 | E6    | 84.78101 | 567  | 62  | N |   |
| P68447 | E7    | 44.55575 | 166  | 20  | N |   |
| P21049 | E8    | 80.53922 | 273  | 42  | N |   |
| p20509 | E9    | 91.44555 | 1006 | 146 | Y |   |
| P21085 | EorfA | 49.13843 | 71   | 9   | n |   |
| p20554 | EorfB | 42.55432 | 106  | 9   | Y |   |
| p20555 | EorfC | 42.52227 | 70   | 11  | N |   |
| p20556 | EorfD | 53.83275 | 66   | 15  | N |   |
| p20557 | EorfE | 63.04056 | 65   | 4   | Y | Y |
| p20558 | EorfF | 51.66814 | 115  | 11  | Y |   |
| P68450 | F1    | 68.00448 | 226  | 21  | N |   |
| P21095 | F10   | 89.65752 | 439  | 65  | N |   |
| P21052 | F11   | 79.95733 | 354  | 45  | N |   |
| P21053 | F12   | 88.68075 | 635  | 95  | N |   |
| P20638 | F13   | 91.70991 | 372  | 71  | Y |   |
| P21019 | F14   | 65.32265 | 73   | 6   | N |   |
| P21020 | F15   | 81.8579  | 158  | 37  | N |   |
| P21021 | F16   | 84.14321 | 231  | 25  | N |   |
| P68454 | F17   | 70.68404 | 101  | 21  | N |   |

|        |       |          |     |     |   |   |
|--------|-------|----------|-----|-----|---|---|
| P68634 | F2    | 94.15347 | 147 | 26  | Y |   |
| P21013 | F3    | 89.12424 | 480 | 94  | N |   |
| p20493 | F4    | 88.21558 | 319 | 27  | Y |   |
| P21014 | F5    | 70.75118 | 321 | 51  | N |   |
| P68601 | F6    | 66.58151 | 74  | 10  | N |   |
| P21016 | F7    | 50.84788 | 92  | 9   | N |   |
| P21017 | F8    | 68.05785 | 65  | 5   | N |   |
| P68452 | F9    | 83.26356 | 212 | 21  | N |   |
| p20559 | ForfA | 59.44491 | 67  | 5   | Y | Y |
| p20560 | ForfB | 65.59204 | 78  | 7   | N |   |
| p20561 | ForfC | 59.57557 | 96  | 7   | Y | Y |
| p20562 | ForfD | 67.73666 | 85  | 5   | Y |   |
| p20563 | ForfE | 58.68662 | 71  | 5   | Y | Y |
| p20564 | ForfF | 66.70897 | 74  | 4   | Y | Y |
| P21022 | G1    | 87.26159 | 591 | 85  | Y |   |
| P68457 | G2    | 93.47739 | 220 | 30  | N |   |
| P68459 | G3    | 84.01472 | 111 | 14  | N |   |
| P68461 | G4    | 91.5997  | 124 | 22  | N |   |
| P21026 | G5    | 93.24123 | 434 | 65  | N |   |
| P68315 | G5p5  | 77.45979 | 63  | 10  | N |   |
| P21027 | G6    | 90.72357 | 165 | 36  | N |   |
| P21028 | G7    | 64.33256 | 371 | 33  | N |   |
| P68612 | G8    | 89.59898 | 260 | 50  | Y |   |
| P21030 | G9    | 86.37393 | 340 | 51  | N |   |
| p20565 | GorfA | 32.24285 | 132 | 13  | N |   |
| p20566 | GorfB | 72.70645 | 72  | 1   | Y | Y |
| P20495 | H1    | 97.21163 | 171 | 21  | Y |   |
| p20496 | H2    | 84.26683 | 189 | 28  | N |   |
| p20497 | H3    | 86.44234 | 324 | 50  | N |   |
| P68439 | H4    | 71.77599 | 795 | 107 | N |   |
| p20538 | H5    | 65.45242 | 203 | 10  | N |   |
| P68697 | H6    | 94.36452 | 314 | 41  | Y |   |
| p20539 | H7    | 93.55347 | 146 | 16  | N |   |
| p20567 | HorfA | 77.6054  | 71  | 2   | Y | Y |
| p20498 | I1    | 83.96295 | 312 | 50  | N |   |
| P68604 | I2    | 67.87248 | 73  | 6   | Y |   |
| p20499 | I3    | 81.56212 | 269 | 45  | N |   |
| P20503 | I4    | 93.1913  | 771 | 112 | Y |   |
| p20500 | I5    | 83.24622 | 79  | 8   | Y | Y |
| P68463 | I6    | 85.76244 | 382 | 60  | N |   |
| p20501 | I7    | 91.60765 | 423 | 55  | N |   |
| p20502 | I8    | 91.6925  | 676 | 120 | Y |   |
| p20568 | lorfA | 57.44336 | 77  | 8   | Y | Y |
| P21032 | J1    | 73.72111 | 153 | 11  | N |   |
| P68564 | J2    | 92.61234 | 177 | 38  | Y |   |
| P21033 | J3    | 89.63018 | 333 | 37  | Y |   |
| P68608 | J4    | 92.21356 | 185 | 33  | Y |   |
| P21083 | J5    | 80.47185 | 133 | 20  | N |   |

|        |         |          |      |     |   |   |
|--------|---------|----------|------|-----|---|---|
| p20504 | J6      | 93.89595 | 1286 | 208 | Y |   |
| p20632 | K1      | 95.64797 | 284  | 47  | Y |   |
| p20532 | K2      | 89.54373 | 369  | 65  | Y |   |
| P20639 | K3      | 92.30271 | 88   | 18  | Y |   |
| p20537 | K4      | 92.23112 | 424  | 72  | Y |   |
| P21084 | K5      | 73.44188 | 136  | 20  | Y |   |
| P68465 | K6      | 88.78416 | 81   | 13  | Y |   |
| P68467 | K7      | 88.34052 | 149  | 16  | Y |   |
| p20569 | KorfA   | 44.21513 | 81   | 12  | N |   |
| p20570 | KorfB   | 61.64135 | 79   | 6   | Y | Y |
| p20540 | L1      | 78.59391 | 250  | 34  | N |   |
| P20843 | L2      | 74.66685 | 87   | 2   | Y |   |
| P21031 | L3      | 79.56406 | 350  | 43  | N |   |
| P20981 | L4      | 79.44113 | 251  | 45  | N |   |
| P68622 | L5      | 77.47556 | 128  | 18  | N |   |
| P20640 | M1      | 86.22016 | 472  | 59  | Y |   |
| P21092 | M2      | 75.51065 | 220  | 39  | N |   |
| P21054 | N1      | 95.31486 | 117  | 12  | Y |   |
| P20641 | N2      | 75.03608 | 175  | 13  | N |   |
| P21093 | O1      | 82.19695 | 666  | 77  | N |   |
| P68690 | O2      | 97.4889  | 108  | 17  | Y |   |
| p0ck22 | O3      | 80.35554 | 35   | 1   | Y | Y |
| P68489 | U7kDa   | 73.8132  | 62   | 3   | Y | Y |
| P68491 | U8p7kDa | 84.77117 | 72   | 2   | Y | Y |

ific (such as groups of unrelated proteins, not a large protein family) observed. This commonly overlaps with vari-  
 d in yellow and excluded as hits. Some select proteins in this category were still further annotated and may be of  
 ers

While these are often orthologs of the same gene/protein, they may be of interest. See supplemental figures.

| Hit                                  | Hit ID     | %ID (Top Hit) |
|--------------------------------------|------------|---------------|
| Helicases (top: HELLS)               | Q9NRZ9     | 20.55         |
| Mitochondrial resolvase tefm         | Q0P4D6     | 21.34         |
| Polymerases (Polr2b)                 | Q8CFI7     | 24.44         |
| Klrh1                                | Q3UU75     | 23.87         |
| Klrb1c                               | P27814     | 20.75         |
| CD47                                 | Q61735     | 27.08         |
| Semaphorin Sema7a                    | Q9QUR8     | 27.23         |
| Klra1                                | P20937     | 24.2          |
| Profilin (Pfn2)                      | A0A0R4IPL1 | 27.27         |
| Steroid dehydrogenases (Top: Hsd3b2) | P26149     | 32.46         |

|                                |        |       |
|--------------------------------|--------|-------|
| sod1                           | O73872 | 18.55 |
| GSDMD                          | P57764 | 20.09 |
| DTYMK                          | P23919 | 18.01 |
| Ligases (Lig3)                 | P97386 | 55.43 |
| TNFRSF1B                       | P20333 | 24    |
| Kelch proteins (diablo is top) | Q9VUU5 | 23.49 |
| Guk1                           | Q64520 | 46.36 |

Serinc1/drosophila ND-15

|       |        |       |
|-------|--------|-------|
| PSME1 | Q06323 | 19.72 |
|-------|--------|-------|

K7DYB1

|                                                   |            |       |
|---------------------------------------------------|------------|-------|
| Kinases (top: VRK1)                               | Q99986     | 40.6  |
| Kelch proteins (top: Danio kelch-like protein 12) | A0A2R8Q6R0 | 28.57 |
| <b>ambiguous</b>                                  |            |       |
| Kinases (top: VRK1)                               | Q99986     | 33.33 |
| Serpins (top: Fly Spn42Dc)                        | A1Z6R4     | 33.04 |
| Serpins (top: Serpina3j)                          | D3Z451     | 29.03 |
| Bcl2l2                                            | P70345     | 13.86 |

\*B13/B14 are fragment



|                                                                      |            |       |
|----------------------------------------------------------------------|------------|-------|
| Ankyrin repeat and SOCS box-containing 15a<br>Below threshold: IL1r2 | A0A2R8PZ70 | 20.53 |
|----------------------------------------------------------------------|------------|-------|

Ankrd37

|                                                                                                               |        |       |
|---------------------------------------------------------------------------------------------------------------|--------|-------|
| ASB4                                                                                                          | Q9Y574 | 20    |
| Ankyrin proteins (top: ANKRD22)                                                                               | Q5VYY1 | 22.76 |
| Ankyrin proteins (top: Danio Ankyrin repeat and SOCS box pr<br>ambiguous - ankyrin or protein phosphatase 1?) | Q7T386 | 23.67 |

|       |        |       |
|-------|--------|-------|
| Slfn1 | Q3UU73 | 25.21 |
|-------|--------|-------|

|       |        |       |
|-------|--------|-------|
| Buffy | Q8T8Y5 | 20.96 |
|-------|--------|-------|

F3/IFNGR1 (below threshold)

Tmem91, KANTR

Strong pyrin domain hits w/ FATCAT alone, some BCL2 domains with TM-align. See main text.

|                          |        |      |
|--------------------------|--------|------|
| Serpins (top: Serpinb1c) | Q5SV42 | 34.2 |
|--------------------------|--------|------|

|       |        |      |
|-------|--------|------|
| Keap1 | Q14145 | 22.2 |
|-------|--------|------|

|       |        |       |
|-------|--------|-------|
| C4BPA | P04003 | 37.45 |
|-------|--------|-------|

|                                                         |        |       |
|---------------------------------------------------------|--------|-------|
| Kelch proteins( top: KLHL8)<br>below threshold: bcl2l15 | Q9P2G9 | 21.03 |
|---------------------------------------------------------|--------|-------|

just under threshold: Nudt2  
Chd3, HELLS, smarcad1 - helicases  
Cmtr1, 2 (methyltransferase)

|        |       |
|--------|-------|
| O16102 | 19.44 |
| Q9W4N2 | 19.79 |

UNG1 (danio)

|        |       |
|--------|-------|
| A2BIQ2 | 19.81 |
|--------|-------|

smarcad1b (danio)  
POL2RG  
Ca5b

|        |       |             |
|--------|-------|-------------|
| E7F1C4 | 21.98 | **look back |
| P62487 | 17.39 |             |
| Q9QZA0 | 33.33 |             |

just under threshold: NudT15, 16, etc

A1A750, weak

lots, ambiguous  
lots, ambiguous

GFER

PolD1

|        |       |
|--------|-------|
| P54358 | 24.26 |
|--------|-------|

TMEM18

CHIC1

|        |       |
|--------|-------|
| Q5VXU3 | 18.18 |
|--------|-------|

PLD4

|        |       |
|--------|-------|
| Q96BZ4 | 25.62 |
|--------|-------|

|       |        |       |
|-------|--------|-------|
| Dut   | Q9CQ43 | 59.86 |
| Rrm2b | Q6PEE3 | 75.24 |

|          |        |       |
|----------|--------|-------|
| lfitm10? | Q8BR26 | 17.11 |
|----------|--------|-------|

|     |        |      |
|-----|--------|------|
| lde | P22817 | 17.9 |
|-----|--------|------|

just below threshold: FEN1/XRN2/XRN1 nucleases

just below threshold: polr2l

just below threshold: Plaat1, tmem222 - previously shown to have similarity to bacterial peptidase, NLPC/P6

|      |        |      |
|------|--------|------|
| PCNA | Q9VIT0 | 20.4 |
|------|--------|------|

|                                                       |        |       |
|-------------------------------------------------------|--------|-------|
| Phosphatases (top: Danio tyrosine phosphatase Q0P4E3) | Q0P4E3 | 27.03 |
|-------------------------------------------------------|--------|-------|

|      |        |       |
|------|--------|-------|
| top1 | E7FE49 | 19.59 |
|------|--------|-------|

mt-co3

|                                                                 |        |       |
|-----------------------------------------------------------------|--------|-------|
| Rrm1<br>ambiguous, maybe odorant receptors/olfactory receptors? | P07742 | 76.01 |
|-----------------------------------------------------------------|--------|-------|

|                        |        |      |
|------------------------|--------|------|
| helicases (top: DHX35) | Q9H5Z1 | 20.5 |
|------------------------|--------|------|

|     |        |       |
|-----|--------|-------|
| TK1 | P04184 | 66.67 |
|-----|--------|-------|

|       |        |       |
|-------|--------|-------|
| cmtr2 | Q9UAS6 | 19.75 |
|-------|--------|-------|

|        |        |       |
|--------|--------|-------|
| POLR2E | P19388 | 21.88 |
|--------|--------|-------|

|                                |        |       |
|--------------------------------|--------|-------|
| POLR2A                         | P24928 | 24.07 |
| Ankyrin proteins (top: Nfkbid) | Q2TB02 | 19.03 |
| Serpins (top: SERPINA3)        | P01011 | 24.59 |
| polr2g                         | P62488 | 20.48 |
| PLD3                           | O35405 | 47.73 |
| MglI                           | O35678 | 32.35 |
| MglI                           |        |       |
| BCL2L10                        | Q9Z0F3 | 18.8  |

ambiguous

|                     |        |       |
|---------------------|--------|-------|
| ASB2, other ankyrin | Q96Q27 | 23.94 |
| MCL1                |        |       |
| GlrX                | P35754 | 46.23 |

scinia proteins with few structural motifs.  
f interest.

s of a Serpin present as a single ORF in vaccinia strain WR







family, Plaat is a phospholipase/acyltransferase within this family

## Synteny Analysis

| Genome          | Accession   |
|-----------------|-------------|
| Vaccinia virus  | NC_006998   |
| Skunkpox virus  | NC_031038   |
| NY014 poxvirus  | NC_035469.1 |
| Myxoma virus    | NC_001132.2 |
| Eptesipox virus | NC_035460.1 |

## Poxvirus BLAST Database

| Genome                         | Accession   |
|--------------------------------|-------------|
| Cotia virus                    | HQ646181.2  |
| Saltwater crocodilepox         | MK903858.1  |
| Deerpox virus                  | AY689437.1  |
| Fowlpox virus                  | MH706124.1  |
| Eastern grey kangaroopox virus | MF661791.2  |
| Lumpy skin disease virus       | NC_003027.1 |
| Molluscum contagiosum virus    | MH320554.1  |
| Orf virus                      | MG716417.1  |
| Pteropox virus                 | KU980965.1  |
| Sea otter poxvirus             | MH427217.1  |
| Sheeppox virus                 | MN072631.1  |
| Squirrel poxvirus              | HE601899.1  |
| Swinepox virus                 | MZ682626.1  |
| Yaba monkey tumor virus        | AY386371.1  |

## Viral gasdermins

| Protein                                   | Accession                  |
|-------------------------------------------|----------------------------|
| Vaccinia virus gasdermin (COP)            | M35027.1:c153690-152956    |
| Rabbitpox virus gasdermin                 | AY484669.1:c159516-158782  |
| Horsepox virus gasdermin                  | KY349117.1:c166272-165538  |
| Buffalopox virus gasdermin                | MG599038.1:c157906-157148  |
| Vaccinia virus gasdermin (WR)             | AY243312.1:c154675-153917  |
| Cowpox virus gasdermin                    | KC813500.1:c153312-152578  |
| Orthopoxvirus abatino gasdermin           | NC_055231.1:c163765-163031 |
| Ectromelia virus gasdermin                | MN912466.1:c156293-155559  |
| Akhmeta virus gasdermin                   | MH607143.1:c167386-166652  |
| Taterapox virus gasdermin                 | DQ437594.1:c153307-152573  |
| Variola virus gasdermin (17CE)            | KY358055.1:c145385-144651  |
| Variola virus gasdermin (1947)            | DQ441432.1:c146026-145292  |
| Variola virus gasdermin (1969)            | DQ441437.1:c146904-146170  |
| Alaskapox virus gasdermin                 | MN240300.1:c166555-165827  |
| Skunkpox virus gasdermin                  | KU749310.1:c167631-166873  |
| Volepox virus gasdermin                   | KU749311.1:c169057-168281  |
| Raccoonpox virus gasdermin                | KU749309.1:c145369-144644  |
| Camelpox virus gasdermin (CMS, truncated) | AY009089.1:c154402-154034  |
| Camelpox virus gasdermin (truncated)      | MK910851.1:c154204-153836  |
| NY014 poxvirus gasdermin                  | MF001305.1:c159640-158771  |
| Murmansk poxxvirus gasdermin              | MF001304.1:c160603-159728  |
| Yoka poxvirus gasdermin                   | HQ849551.1:c134784-134035  |
| Skunkpox virus gasdermin (short)          | KU749310.1:172437-172985   |
| Racconpox virus gasdermin (short)         | KU749309.1:150174-150722   |
| Volepox virus gasdermin (short)           | KU749311.1:173861-174445   |
| Murmansk poxxvirus gasdermin (short)      | MF001304.1:c165763-165224  |
| NY014 poxvirus gasdermin (short)          | MF001305.1:c164808-164269  |
| Myxoma virus gasdermin                    | NP_051846.1                |
| Rabbit fibroma virus gasdermin            | NP_052021.1                |
| Eptesipox virus gasdermin                 | YP_009408097.1             |

## Vertebrate gasdermins

| Protein                           | Accession      |
|-----------------------------------|----------------|
| Human gasdermin a                 | NP_835465.2    |
| Chicken gasdermin a               | NP_001026532.1 |
| Bos taurus gasdermin a            | NP_001071558.1 |
| Macaca mulatta gasdermin a        | XP_014975037.1 |
| Pan troglodytes gasdermin a       | XP_001171222.1 |
| Desmodus rotundus gasdermin a     | XP_024429158.1 |
| Rousettus aegyptiacus gasdermin a | XP_016020091.2 |
| Pteropus alecto gasdermin a       | XP_006924750.1 |
| Halichoerus grypus gasdermin a    | XP_035935879.1 |
| Octodon degus gasdermin a         | XP_004633937.1 |
| Rhinatrema bivittatum gasdermin a | XP_029428328.1 |
| Amblyraja radiata gasdermin a     | XP_032891479.1 |
| Mouse gasdermin a3                | Q5Y4Y6         |
| Mouse gasdermin a3                | Q9EST1         |

|                                    |                |
|------------------------------------|----------------|
| Mouse gasdermin a2                 | Q32M21         |
| Human gasdermin b                  | NP_001159430.1 |
| Bos taurus gasdermin b             | NP_001231146.1 |
| Pan troglodytes gasdermin b        | XP_009430521.1 |
| Sarcophilus harrisii gasdermin b   | XP_023358160.1 |
| Pteropus alecto gasdermin b        | XP_024897515.1 |
| Rousettus aegyptiacus gasdermin b  | XP_036078993.1 |
| Desmodus rotundus gasdermin b      | XP_024429114.1 |
| Macaca mulatta gasdermin b         | XP_014975035.1 |
| Halichoerus grypus gasdermin b     | XP_035935913.1 |
| Human gasdermin c                  | NP_113603.1    |
| Macaca mulatta gasdermin c         | XP_28708741.1  |
| Bos taurus gasdermin c             | NP_001039469.1 |
| Sarcophilus harrisii gasdermin c   | XP_31803207.1  |
| Rousettus aegyptiacus gasdermin c  | XP_036088919.1 |
| Desmodus rotundus gasdermin c      | XP_024427836.1 |
| Felis catus gasdermin c            | XP_019678683.1 |
| Pan troglodytes gasdermin c        | XP_001153860.1 |
| Mus pahari gasdermin c             | XP_021073018.1 |
| Human gasdermin d                  | NP_079012.3    |
| Mouse gasdermin d                  | NP_081236.1    |
| Bos taurus gasdermin d             | NP_001039625.1 |
| Macaca mulatta gasdermin d         | XP_015001615.2 |
| Pteropus alecto gasdermin d        | XP_006913014.1 |
| Rousettus aegyptiacus gasdermin d  | XP_036089037.1 |
| Desmodus rotundus gasdermin d      | XP_024428237.1 |
| Pan troglodytes gasdermin d        | XP_009454389.2 |
| Felis catus gasdermin d            | XP_023104116.1 |
| Human gasdermin e                  | NP_001120925.1 |
| Mouse gasdermin e                  | NP_061239.1    |
| Chicken gasdermin e                | NP_001006361.1 |
| Bos taurus gasdermin e             | NP_001180041.1 |
| Xenopus tropicalis gasdermin e     | XP_002933445.2 |
| Macaca mulatta gasdermin e         | XP_001096213.2 |
| Pteropus alecto gasdermin e        | XP_006912063.1 |
| Sarcophilus harrisii gasdermin e   | XP_031796450.1 |
| Chelonia mydas gasdermin e         | XP_027689547.1 |
| Rana temporaria gasdermin e        | XP_040208817.1 |
| Chrysemys picta bellii gasdermin e | XP_023962559.1 |
| Rhinatrema bivittatum gasdermin e  | XP_029444983.1 |
| Octodon degus gasdermin e          | XP_004626528.1 |
| Mus pahari gasdermin e             | XP_021046698.1 |
| Pygosceli adeliae gasdermin e      | XP_009324004.1 |
| Desmodus rotundus gasdermin e      | XP_024418892.1 |
| Rousettus aegyptiacus gasdermin e  | XP_016015046.2 |
| Amblyraja radiata gasdermin e      | XP_032903802.1 |
| Pan troglodytes gasdermin e        | XP_001159685.3 |

**Omitted from tree (severe truncation)**

Hypsugopox virus gasdermin (pseudogene)

MK860688.1:c133573-132651

## Vertebrate pyrin domain containing proteins

| <b>Protein</b>    | <b>Accession</b> |
|-------------------|------------------|
| POP1 (Human)      | NP_690865.1      |
| ASC (Human)       | NP_660183.1      |
| Danio PYD protein | NP_001104231.1   |
| ASC (Danio)       | Q9I9N6.1         |
| PYDC2 (Human)     | NP_001076777.1   |
| AIM2 (Mouse)      | NP_001013801.2   |
| IFI203 (Mouse)    | BAE43039.1       |
| Danio CASPb       | NP_690840.2      |
| Danio CASPa       | NP_571580.1      |

## M013L family

| <b>Protein</b>         | <b>Accession</b> |
|------------------------|------------------|
| M013L                  | NP_051727.1      |
| S013L                  | NP_051902.1      |
| Deerpox M013L homolog  | YP_227401.1      |
| Yaba M013L homolog     | NP_073403.1      |
| Tanapox M013L homolog  | ABQ43490.1       |
| Swinepox m013L homolog | NP_570174.1      |

## C1L family

| <b>Protein</b>               | <b>Accession</b> |
|------------------------------|------------------|
| Vaccinia C1 protein          | P21036.1         |
| Buffalopox C1 homolog        | QCY53926.1       |
| Cowpox C1 homolog            | AGY97559.1       |
| Rabbitpox C1 homolog         | AAS49732.1       |
| Horsepox C1 homolog          | YP_010509239.1   |
| Orthopox abatino C1 homolog  | YP_010085697.1   |
| Akhmeta virus C1 homolog     | YP_010085480.1   |
| Variola B22L (C1 homolog)    | AAA69361.1       |
| Monkeypox C1 homolog         | YP_010377017.1   |
| Alaskapox C1 homolog         | QED21215.1       |
| Volepox C1 homolog           | YP_009281774.1   |
| Skunkpox C1 homolog          | YP_009282720.1   |
| Raccoonpox C1 homolog        | YP_009143336.1   |
| NY014 poxvirus C1 homolog    | YP_009408409.1   |
| Murmansk poxvirus C1 homolog | YP_009408207.1   |
| Yoka poxvirus C1 homolog     | YP_004821365.1   |

## **Cloning**

### **OLIGO**

pCMV\_hsGSDMD\_N\_R  
pCMV\_hsGSDMD\_C\_F  
pCMV\_hsGSDMD\_C\_R  
pEF-Flag\_F  
pEF-C1\_R  
C1\_PYD\_r  
C1\_bcl2\_fwd1  
C1\_bcl2\_fwd2  
cop\_donor\_c1\_5pF  
cop\_donor\_c1\_5pR  
cop\_donor\_c1\_3pF  
cop\_donor\_c1\_3pR

## **PCR Genotyping for Recombinant Virus**

### **OLIGO**

a47\_5p\_flank\_PCRfwd  
a47\_5p\_flank\_PCRrev\_rec  
a47\_5p\_flank\_PCRrev\_wt  
a47\_3p\_flank\_PCRfwd\_rec  
a47\_3p\_flank\_PCRfwd\_wt  
a47\_3p\_flank\_PCRrev  
c1\_5p\_flank\_PCRfwd  
c1\_5p\_flank\_PCRrev\_wt  
c1\_3p\_flank\_PCRfwd\_wt  
c1\_3p\_flank\_PCRrev

## SEQUENCE

CGTCAAActcgagctaATCTGTCAAGAAATTGTGGAG  
gacctctagaaccATGGAACAAAACTCATCTCAGAAGAGGATCTGggttctGGGGTCCCCGCTGAAG  
CGTCAACTCGAGctaATGGGGTTCTTGGCTAAGACCGGAC  
gaatCCCGGGaccatggactacaaagacg  
CCTACTAgcggccgcctaTTTGCTCATAAGTTCCTTC  
CATAgcggccgcctaGAGTATAGCAAATCTGACTGCTG  
gacgacaagGGTGGAGGTGGTACCatgGACAAAATGACCGAGGATATTAAGC  
gacctctagaaccatggactacaaagacgatgacgacaagGGTGGAGG  
**gctc**aagctttcatcctttgataattttcaaattc  
gctaCAATTGttttttataaaaaatattgaatatataaacctttac  
gcttCTCGAGttattttttaccatatagatcaatcattagatc  
gctaGAGCTCttcaaattttcattaactacgtg

## SEQUENCE

cgattaatgccccacgagac  
**GTGACCGTTTACGTCGCC**  
**gagcttagtccgtttgtccac**  
**GAGGACGTGACGGCTG**  
ctgagaggtcaatacctaactcc  
**cgctacatggtctgcccgtaac**  
cggagacgccgtaataattcc  
**cctacgataggacacgtaaaagc**  
**catcatctgtaagattttgagatgtc**  
**cgctaagcgaatgatcgc**



## NOTES

PCR off of gBlock for full-length GSDMD

PCR off of gBlock for full-length GSDMD

PCR off of gBlock for full-length GSDMD

For all FLAG-tagged constructs (C1)

For C1 full length and C1 BCL2 domain

used with pEF-Flag\_F

first PCR for BCL2 domain cloning: used with with pEF\_C1\_R

second PCR for BCL2 domain cloning: used with pEF\_C1\_R, had to add a third PCR round (pEF\_C1\_)

Used VC2 DNA as template to paste into cut pUC19\_muGFP\_A47\_donor vector

Used VC2 DNA as template to paste into cut pUC19\_muGFP\_A47\_donor vector

Used VC2 DNA as template to paste into cut pUC19\_muGFP\_A47\_donor vector

Used VC2 DNA as template to paste into cut pUC19\_muGFP\_A47\_donor vector

## NOTES

expect:250bp

expect: 380bp

expect: 287bp

expect: 191

TM 57, for recomb: use with a47\_5p\_flank\_PCRrev\_rec: expect 270bp product, for WT use with c1\_5i

TM56

TM 54

TM 55, for rec use with a47\_5p\_flank\_PCRrev\_wt, expect 220bp product, for WT expect 240 (with c1\_

R) to add correct cut site due to mistake in cloning design

p\_flank\_PCRfwd, expect 240bp product

\_5p\_flank\_PCRrev\_wt)

|                        |            |
|------------------------|------------|
| pCMV_vvGSDM            | This Study |
| pCMV_GSDMD_CTD         | This Study |
| pEF1 $\alpha$ _C1      | This Study |
| pEF1 $\alpha$ _C1_PYD  | This Study |
| pEF1 $\alpha$ _C1_BCL2 | This Study |
| pUC19_muGFP_Donor_A47  | This Study |
| pUC19_muGFP_Donor_C1   | This Study |
| pET_SUMO_eptvGSDM      | This Study |

pLEX-MCS-ASC-GFP was a gift from Christian Stehlik (Addgene, catalog number: 73957)

pCMV-pro-IL1 $\beta$ -C-Flag was a kind gift from Bruce Beutler (Addgene, catalog number: 75131)

pcDNA3-N-Flag-NLRP3 was a kind gift from Bruce Beutler (Addgene, catalog number: 75127)

pcDNA3-N-Flag-ASC1 was a kind gift from Bruce Beutler (Addgene, catalog number: 75134)

pcDNA3-N-Flag-Caspase-1 was a kind gift from Bruce Beutler (Addgene, catalog number: 75128)

pcDNA3-N-HA-NEK7 was a kind gift from Bruce Beutler (Addgene, catalog number: 75142)

Table S1. Crystallographic statistics, Related to Figure 2 and Figure NN

|                                              | EPTV A47L              | EPTV A47L<br>(SeMet)   |
|----------------------------------------------|------------------------|------------------------|
| <b>Data Collection</b>                       |                        |                        |
| Resolution (Å) <sup>a</sup>                  | 48.65–1.46 (1.48–1.46) | 48.39–1.54 (1.57–1.54) |
| Wavelength (Å)                               | 0.9792                 | 0.9792                 |
| Space group                                  | C 2 2 2 <sub>1</sub>   | C 2 2 2 <sub>1</sub>   |
| Unit cell: a, b, c (Å)                       | 64.46 74.14 95.60      | 63.51, 74.71, 95.29    |
| Unit cell: $\alpha$ , $\beta$ , $\gamma$ (°) | 90.00 90.00 90.00      | 90.00, 90.00, 90.00    |
| Molecules per ASU                            | 1                      | 1                      |
| Total reflections                            | 543256                 | 920245                 |
| Unique reflections                           | 40114                  | 33934                  |
| Completeness (%) <sup>a</sup>                | 100.0 (99.6)           | 100.0 (99.9)           |
| Multiplicity <sup>a</sup>                    | 13.5 (13.2)            | 27.1 (23.4)            |
| $I/\sigma^a$                                 | 18.3 (1.6)             | 15.7 (2.1)             |
| CC(1/2) <sup>b</sup> (%) <sup>a</sup>        | 99.9 (50.5)            | 99.9 (88.8)            |
| Rpim <sup>c</sup> (%) <sup>a</sup>           | 1.9 (71.8)             | 3.0 (68.9)             |
| Sites                                        |                        | 5                      |
| <b>Refinement</b>                            |                        |                        |
| Resolution (Å)                               | 48.65–1.46             |                        |
| Free reflections                             | 40033                  |                        |
| R-factor / R-free                            | 19.0 / 21.2            |                        |
| Bond distance (RMS Å)                        | 0.01                   |                        |
| Bond angles (RMS °)                          | 1.10                   |                        |
| <b>Structure/Stereochemistry</b>             |                        |                        |
| No. atoms: protein                           | 1658                   |                        |
| No. atoms: water                             | 85                     |                        |
| Average B-factor: protein                    | 32.8                   |                        |
| Average B-factor: water                      | 43.1                   |                        |
| Ramachandran plot: favored                   | 99.01%                 |                        |
| Ramachandran plot: allowed                   | 0.99%                  |                        |
| Ramachandran plot: outliers                  | 0.00%                  |                        |
| Rotamer outliers                             | 0.52%                  |                        |
| MolProbity <sup>d</sup> score                | 1.05                   |                        |
| Protein Data Bank ID                         | TBD                    |                        |

<sup>a</sup> Highest resolution shell values in parentheses

<sup>b</sup> (Karplus and Diederichs, 2012)

<sup>c</sup> (Weiss, 2001)

<sup>d</sup> (Chen et al., 2010)

7kDaAtIP : No hits, top-scoring values are indicated

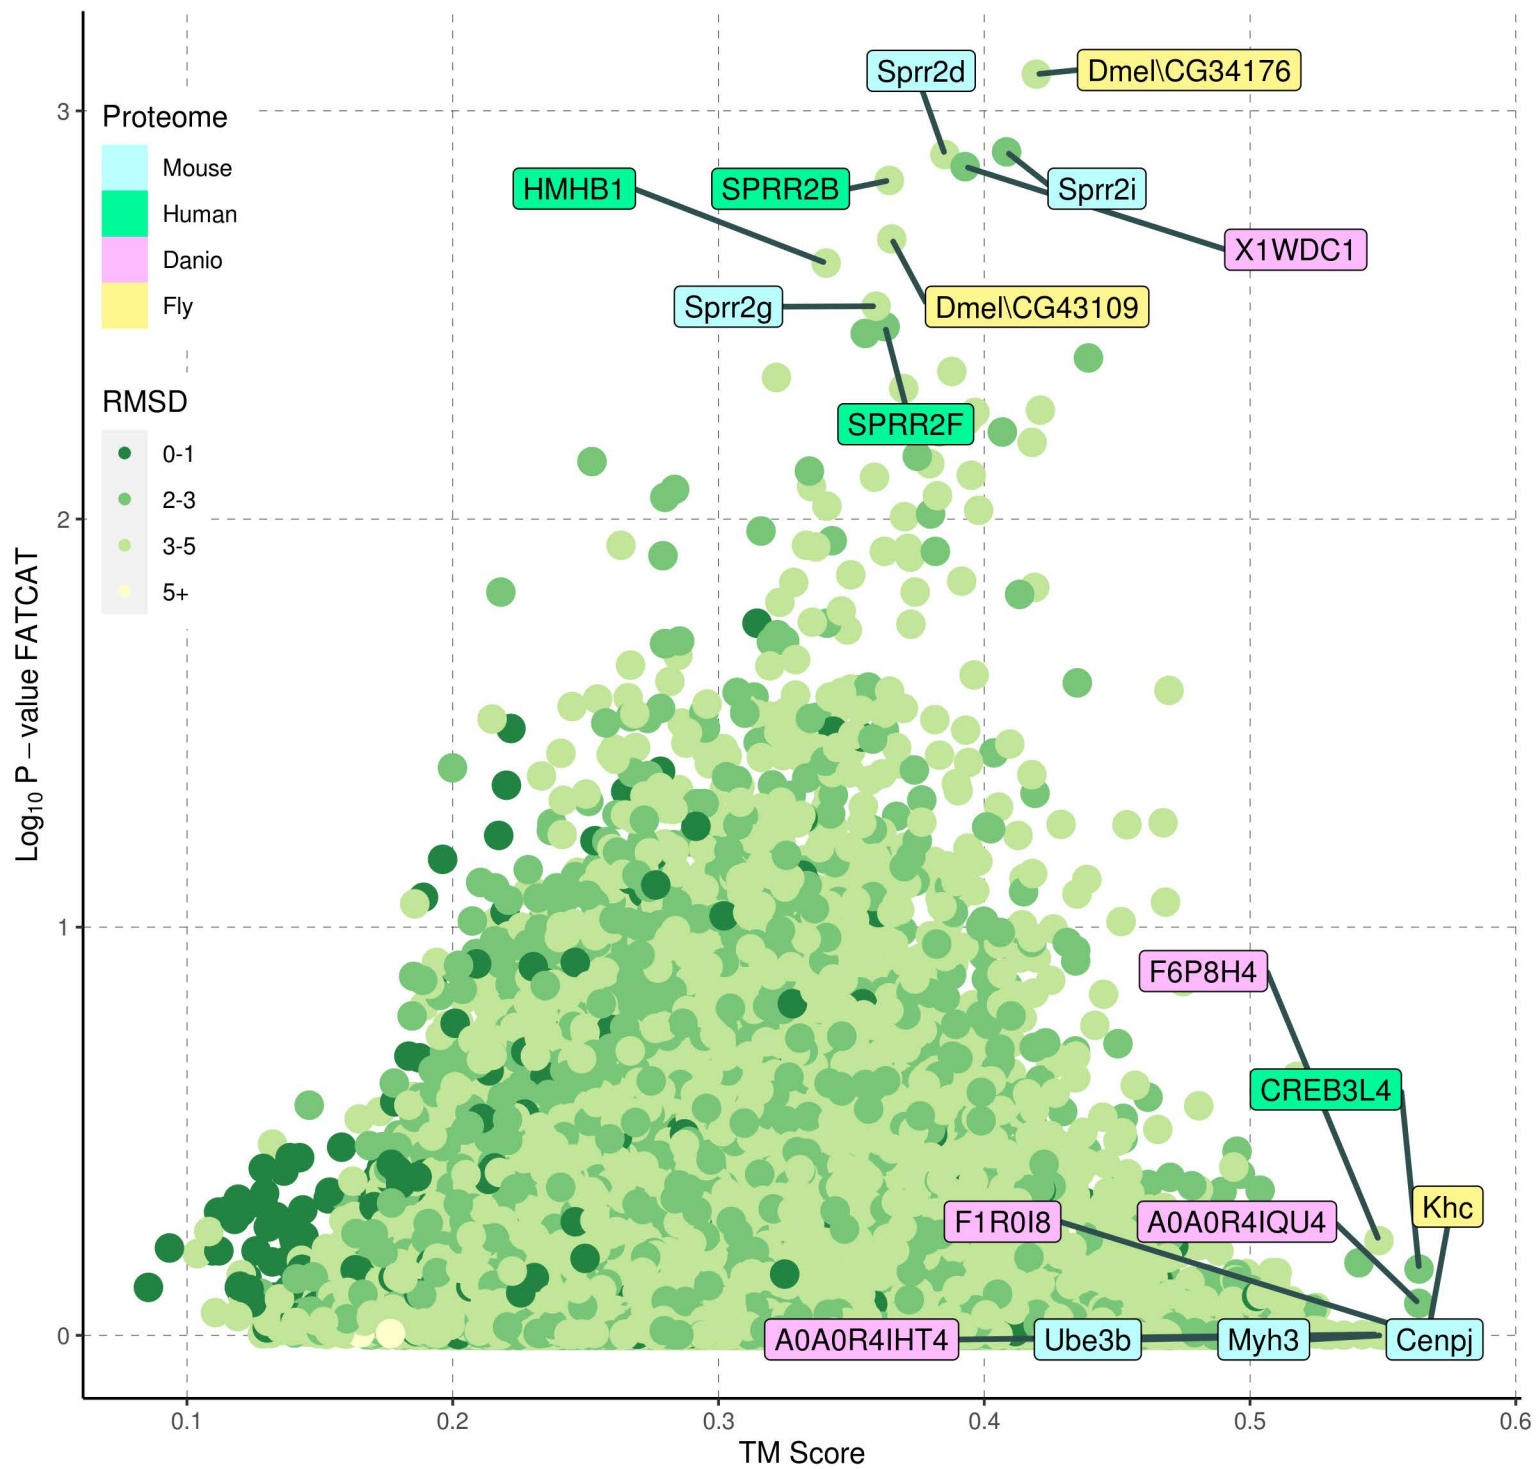

A1 : No hits, top-scoring values are indicated

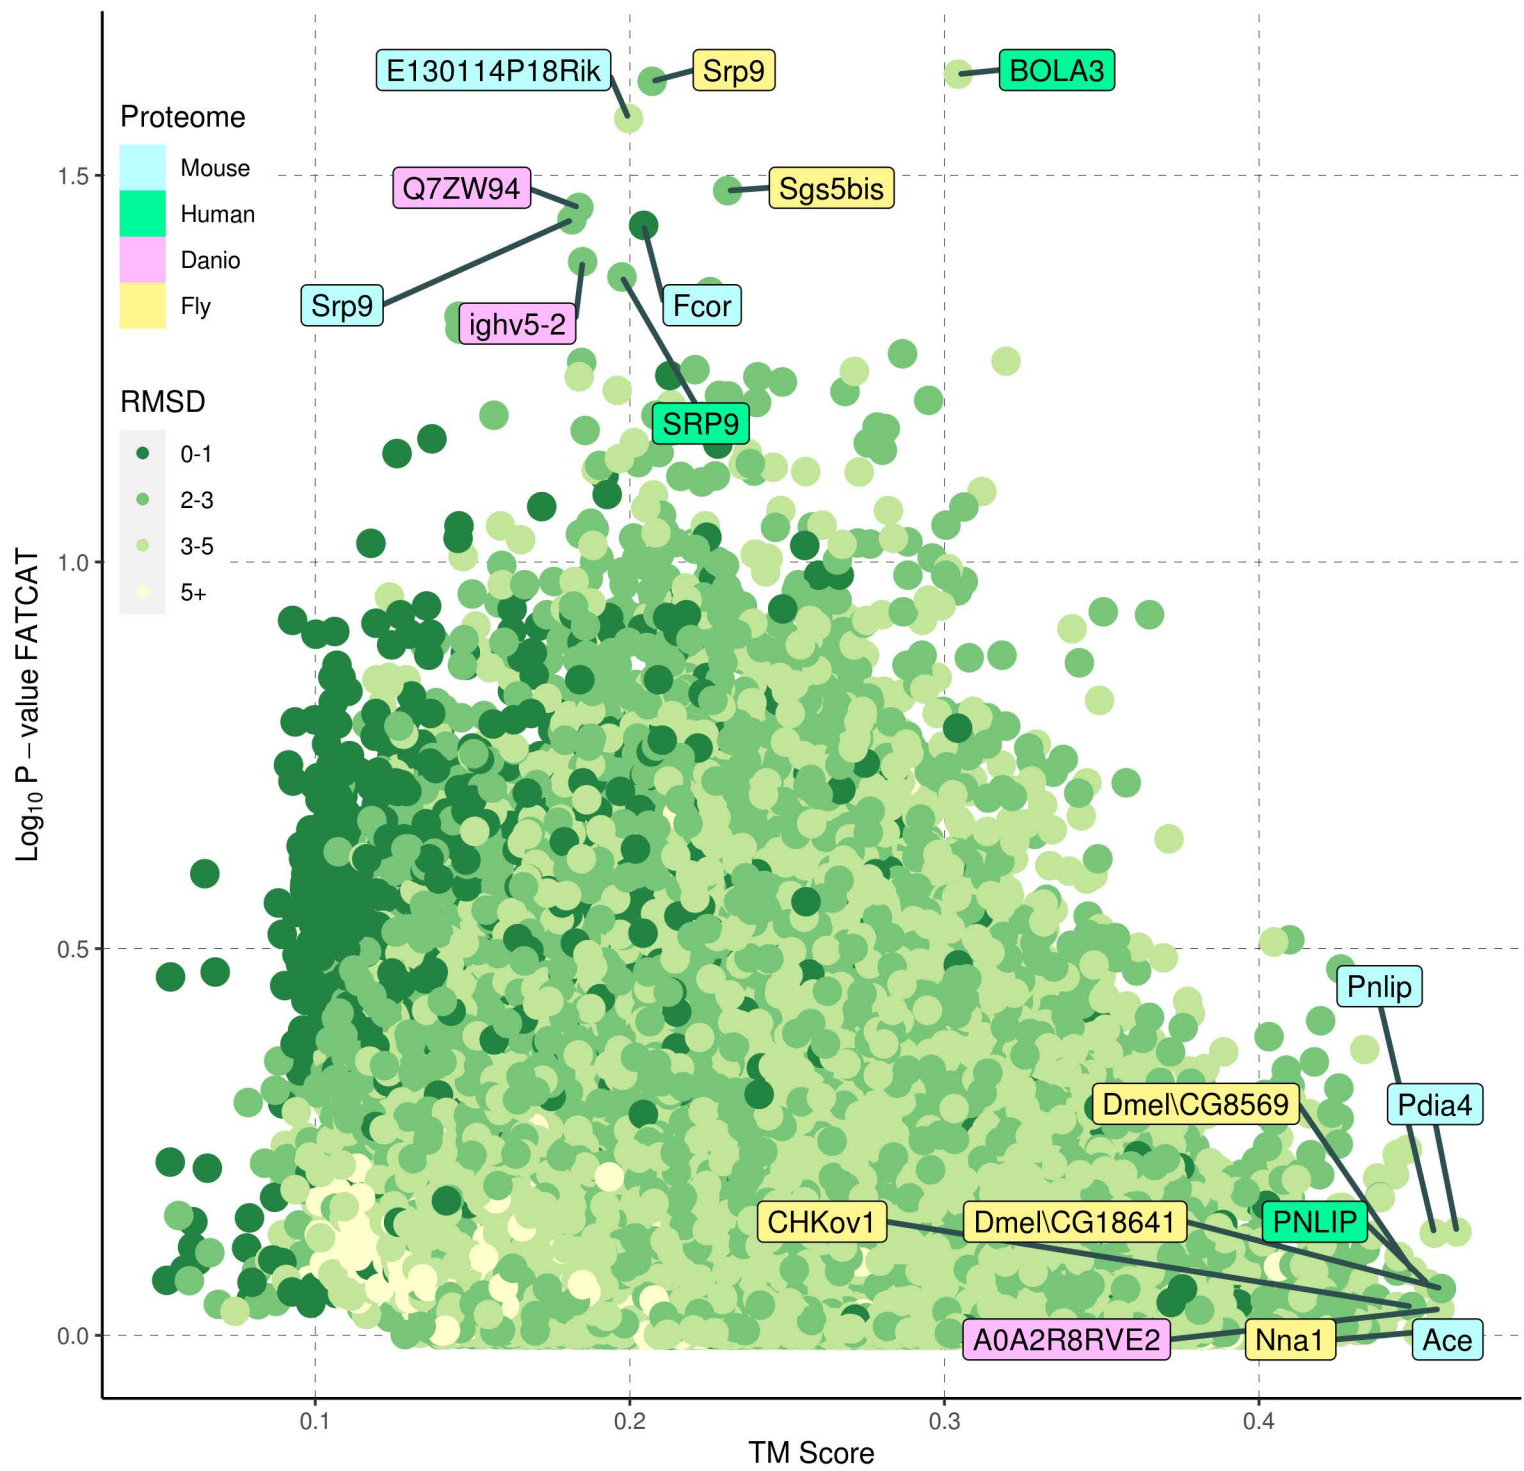

# A2 : No hits, top-scoring values are indicated

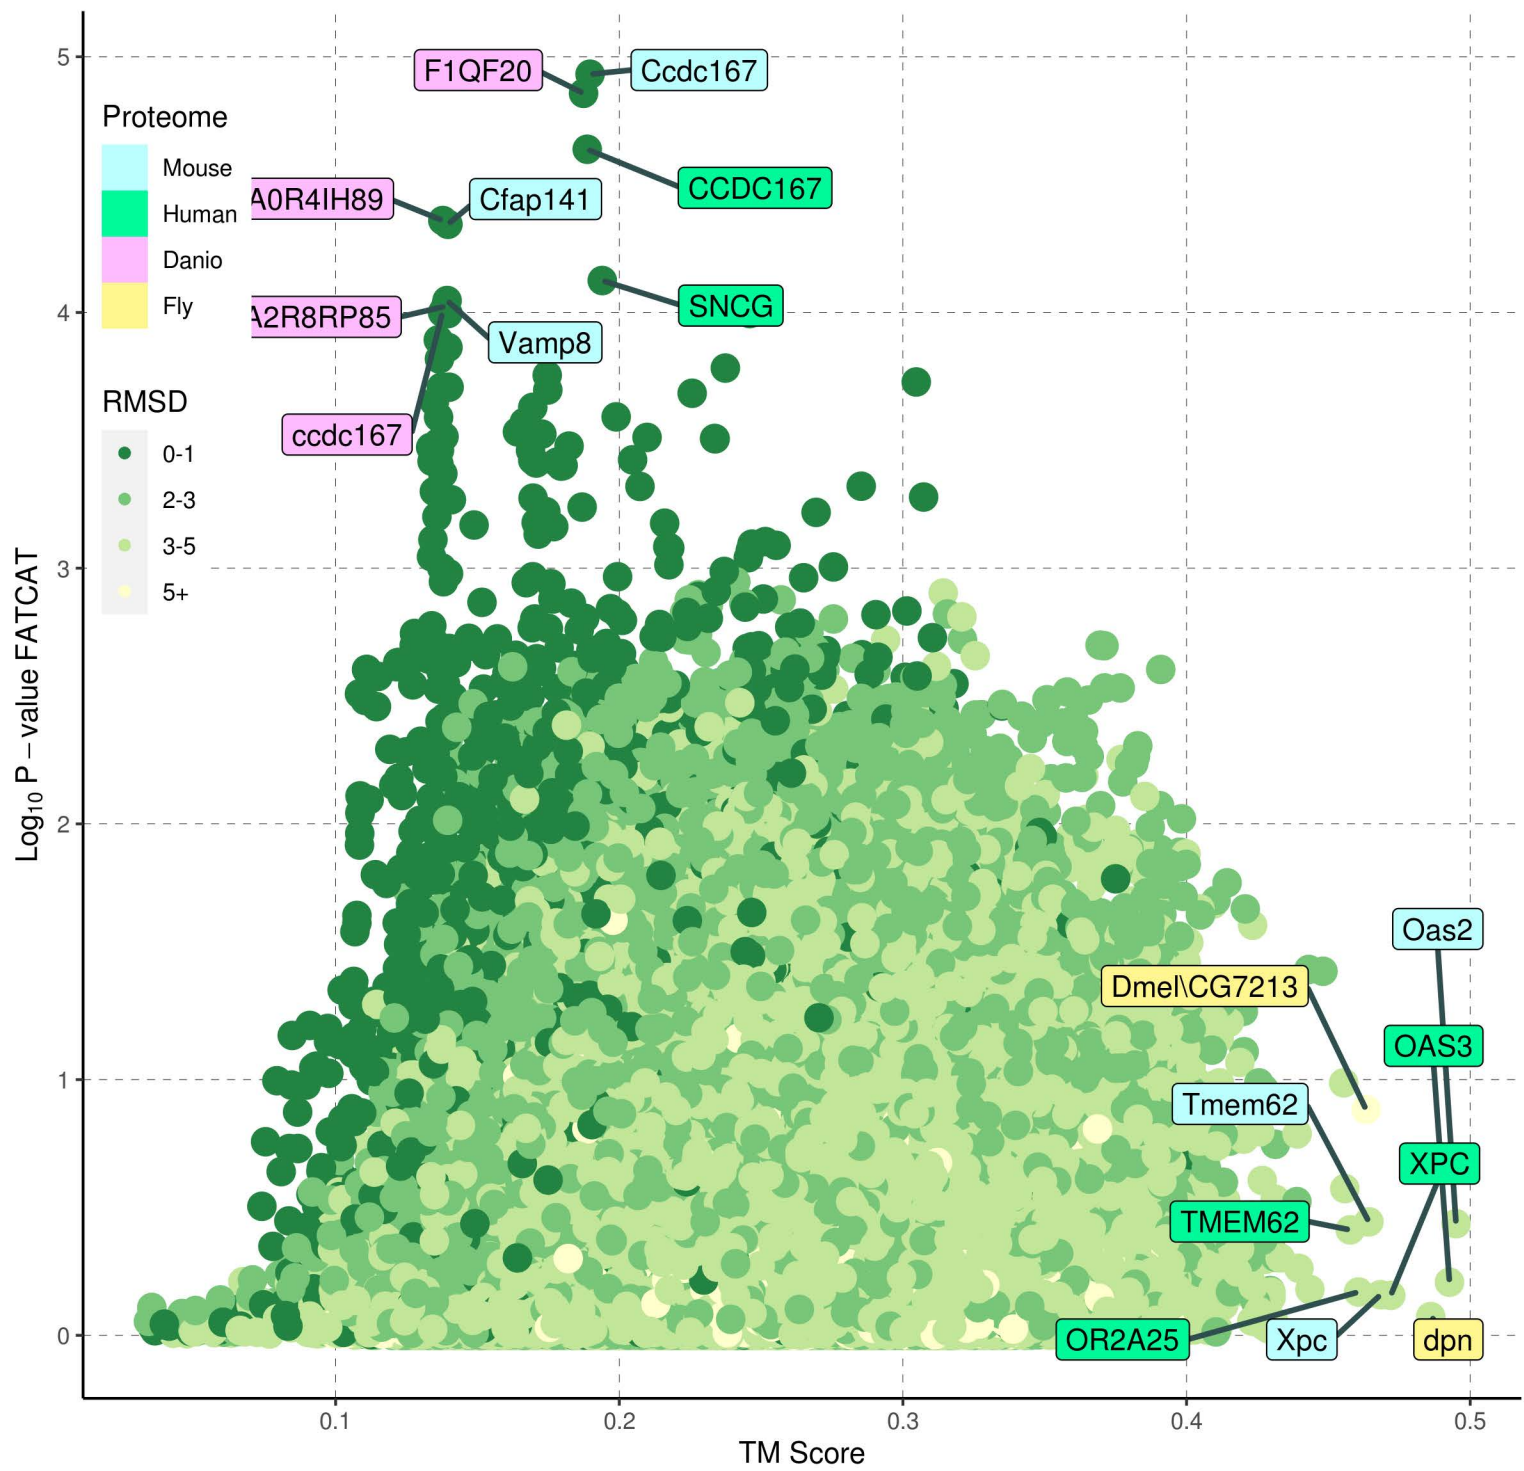

A2p5 : No hits, top-scoring values are indicated

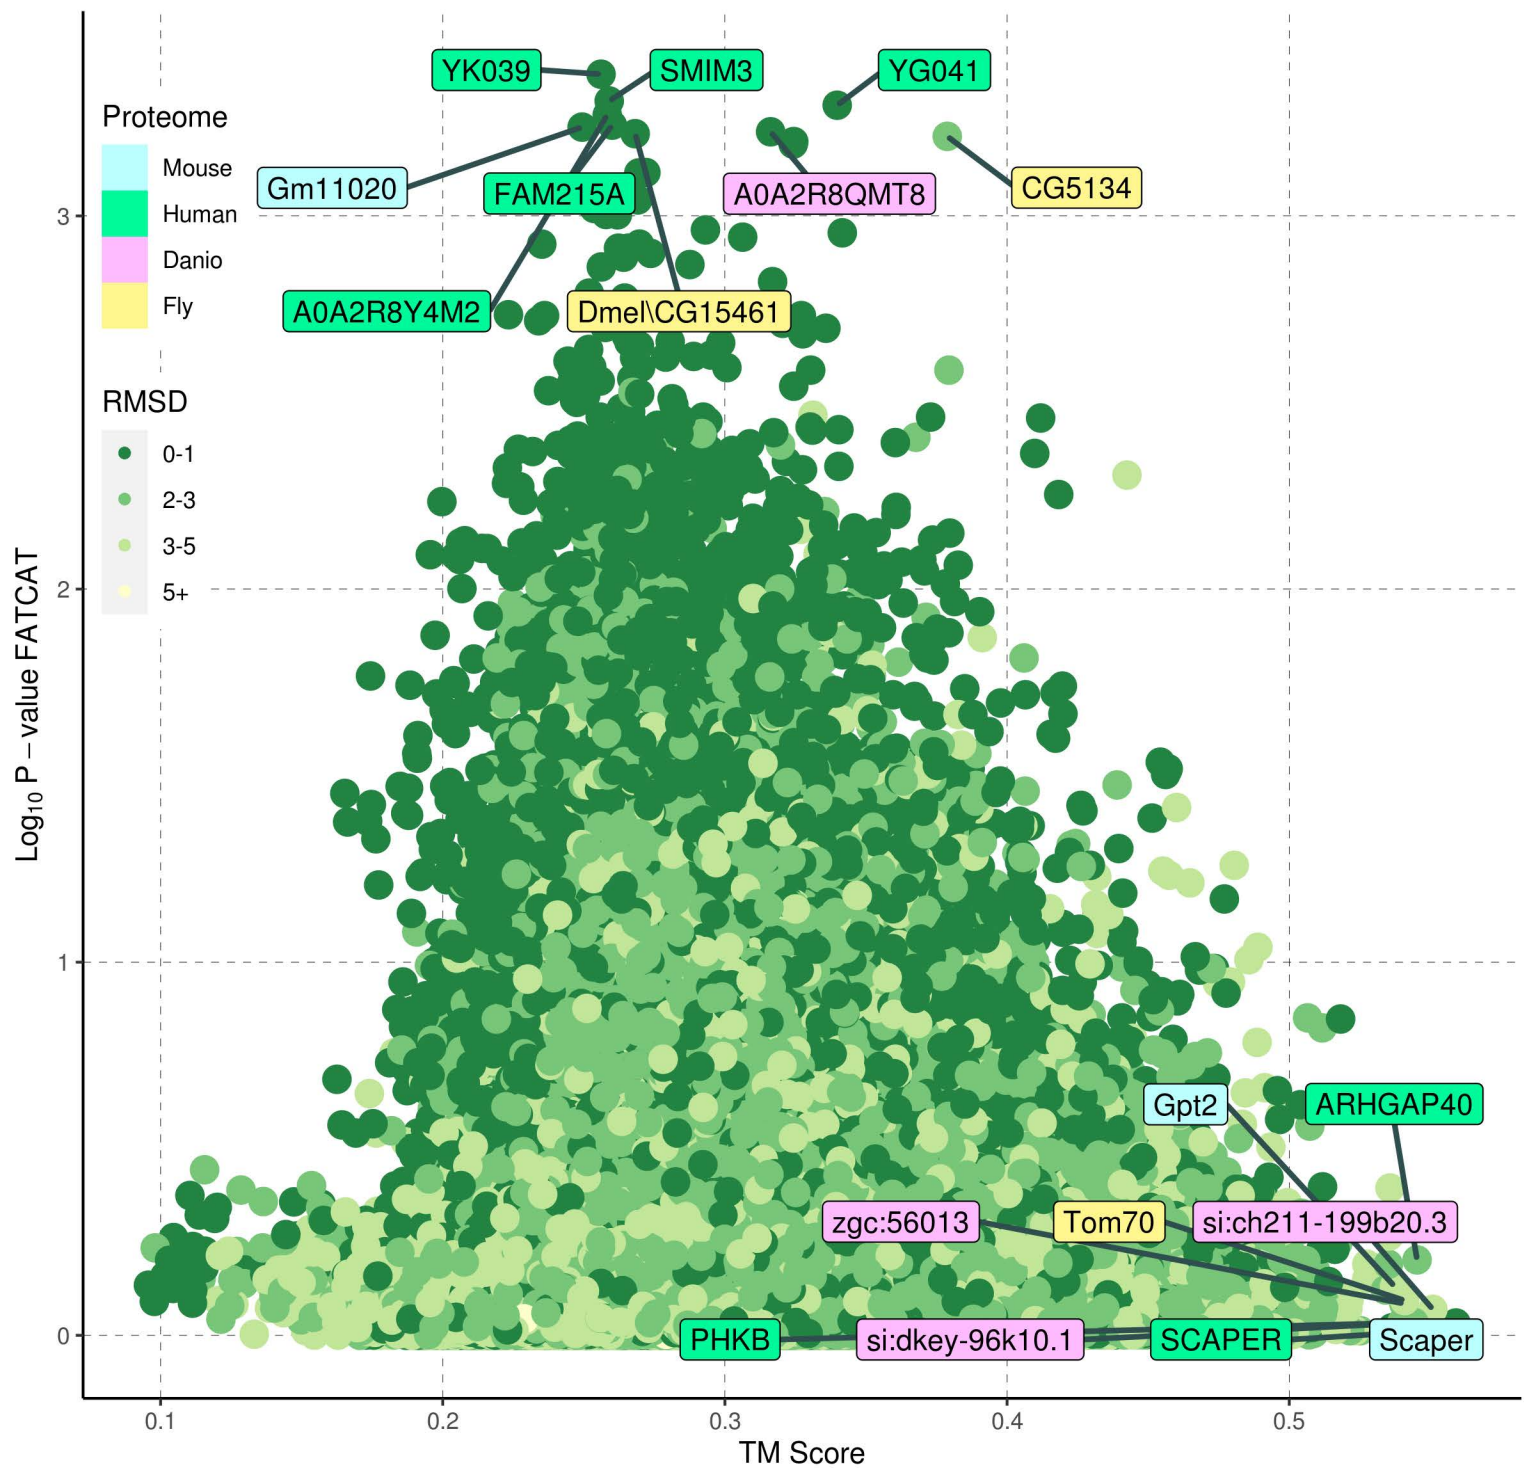



A3 : No hits, top-scoring values are indicated

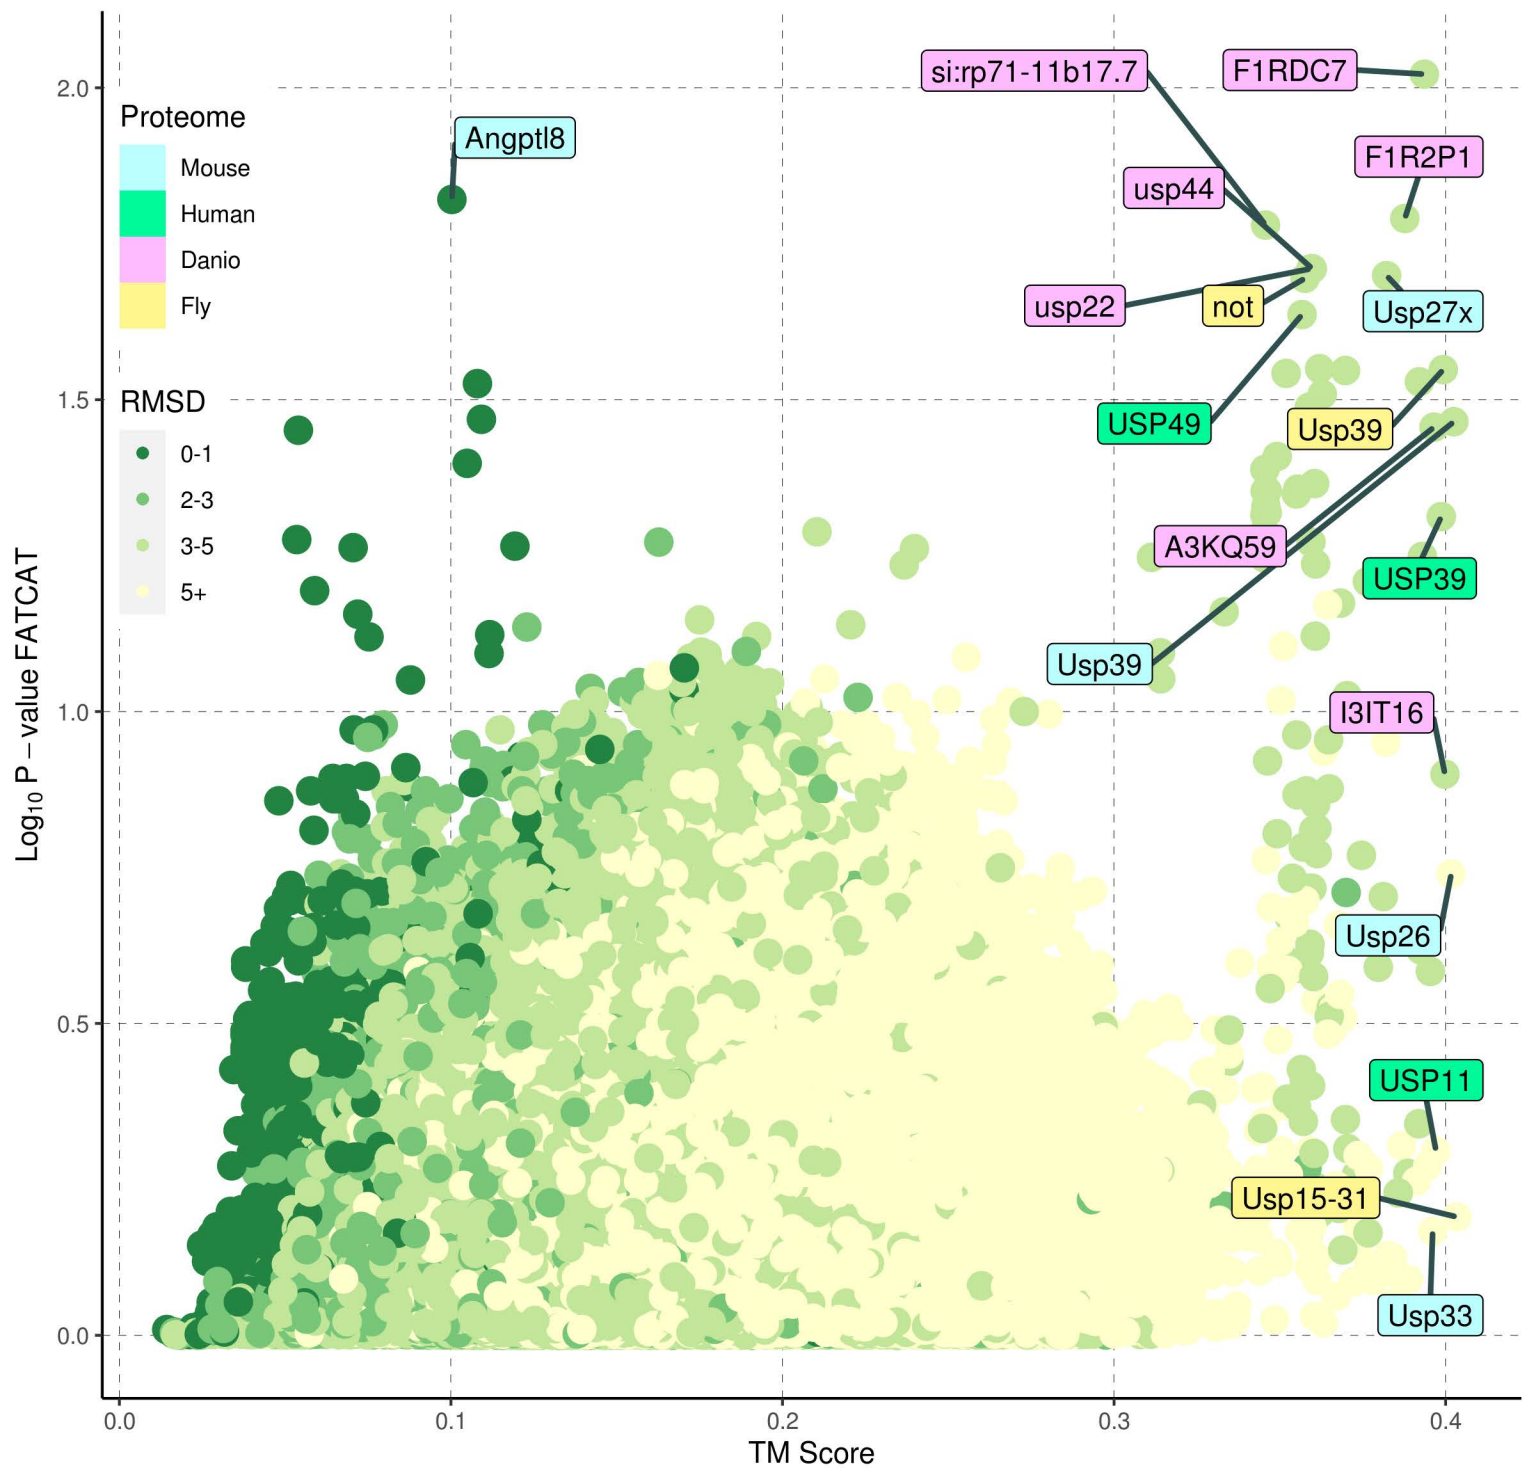

# A4 : No hits, top-scoring values are indicated

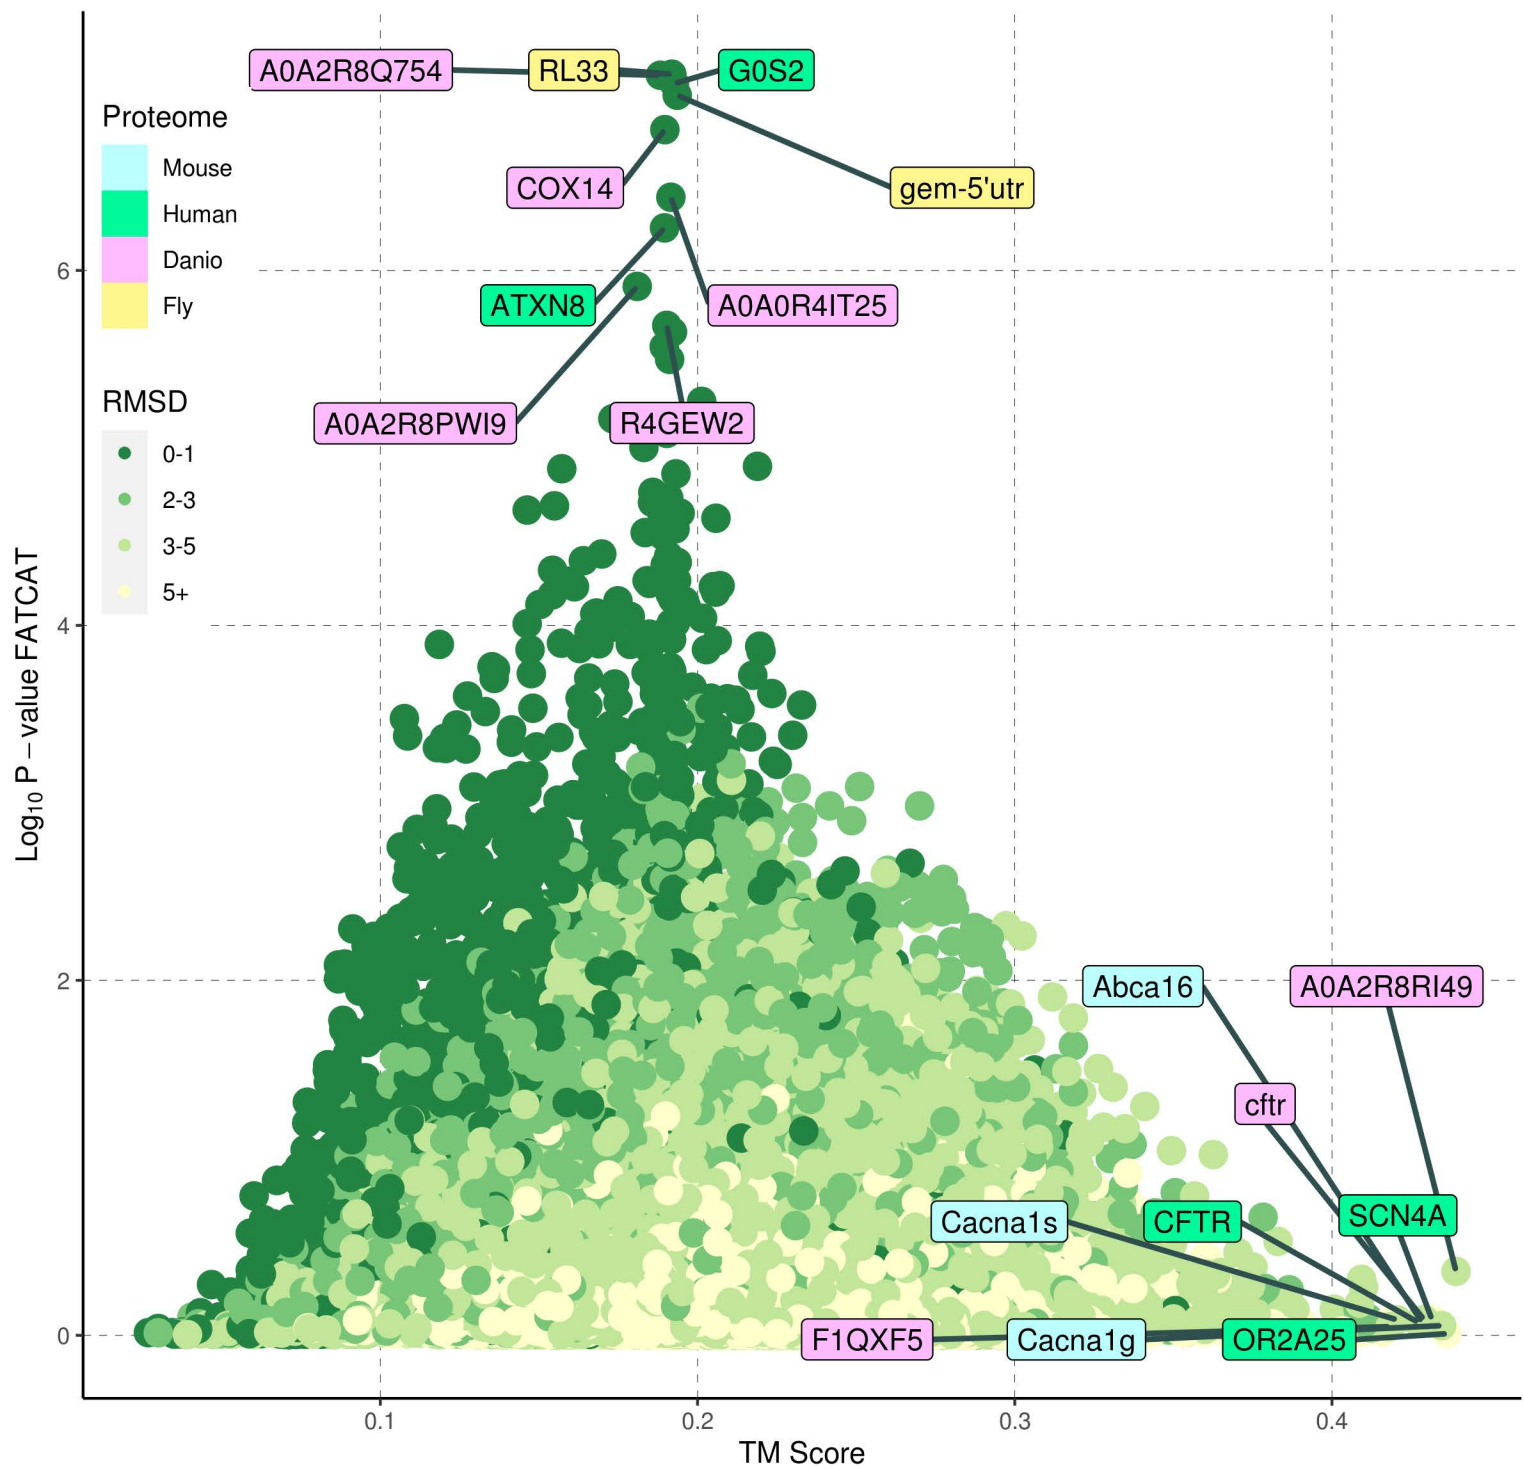

A5 : No hits, top-scoring values are indicated

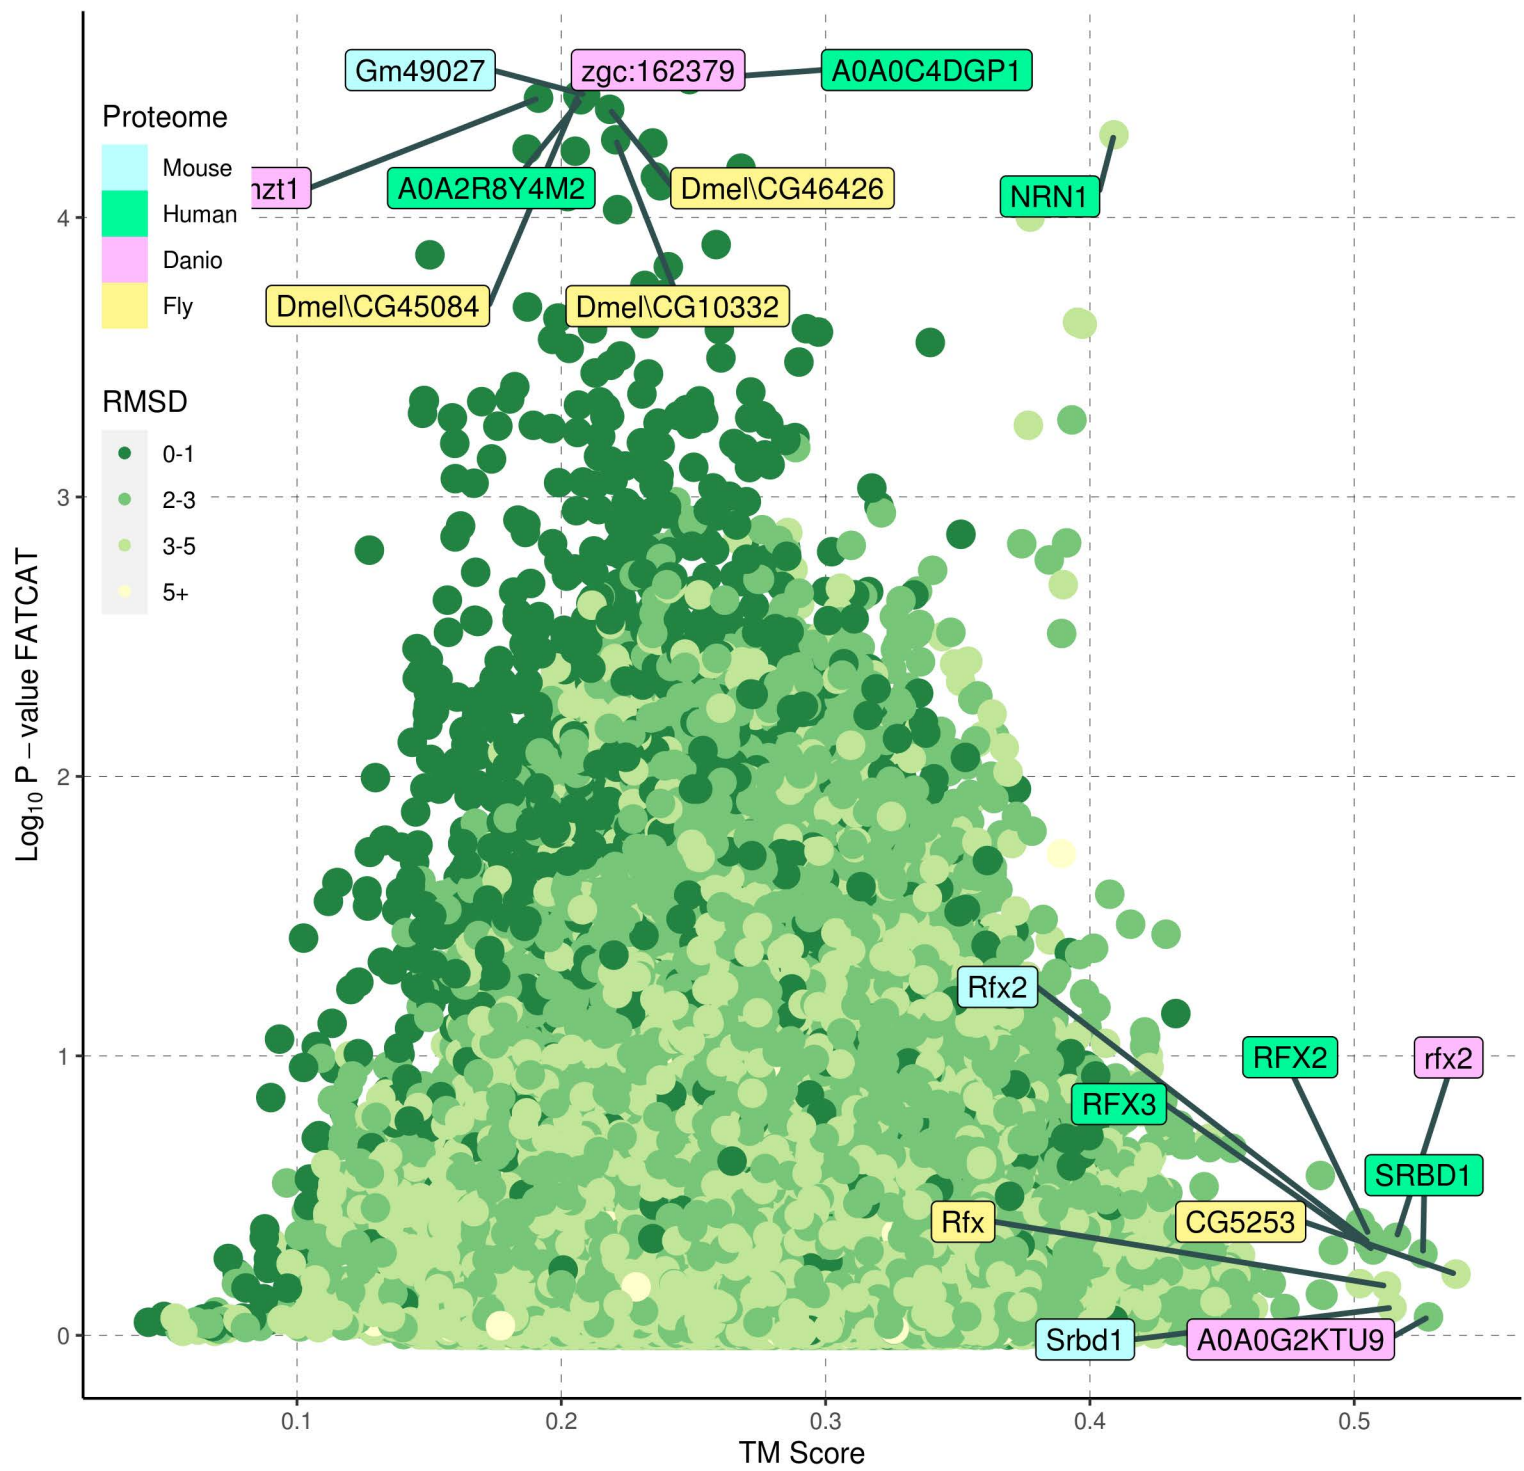

A6 : No hits, top-scoring values are indicated

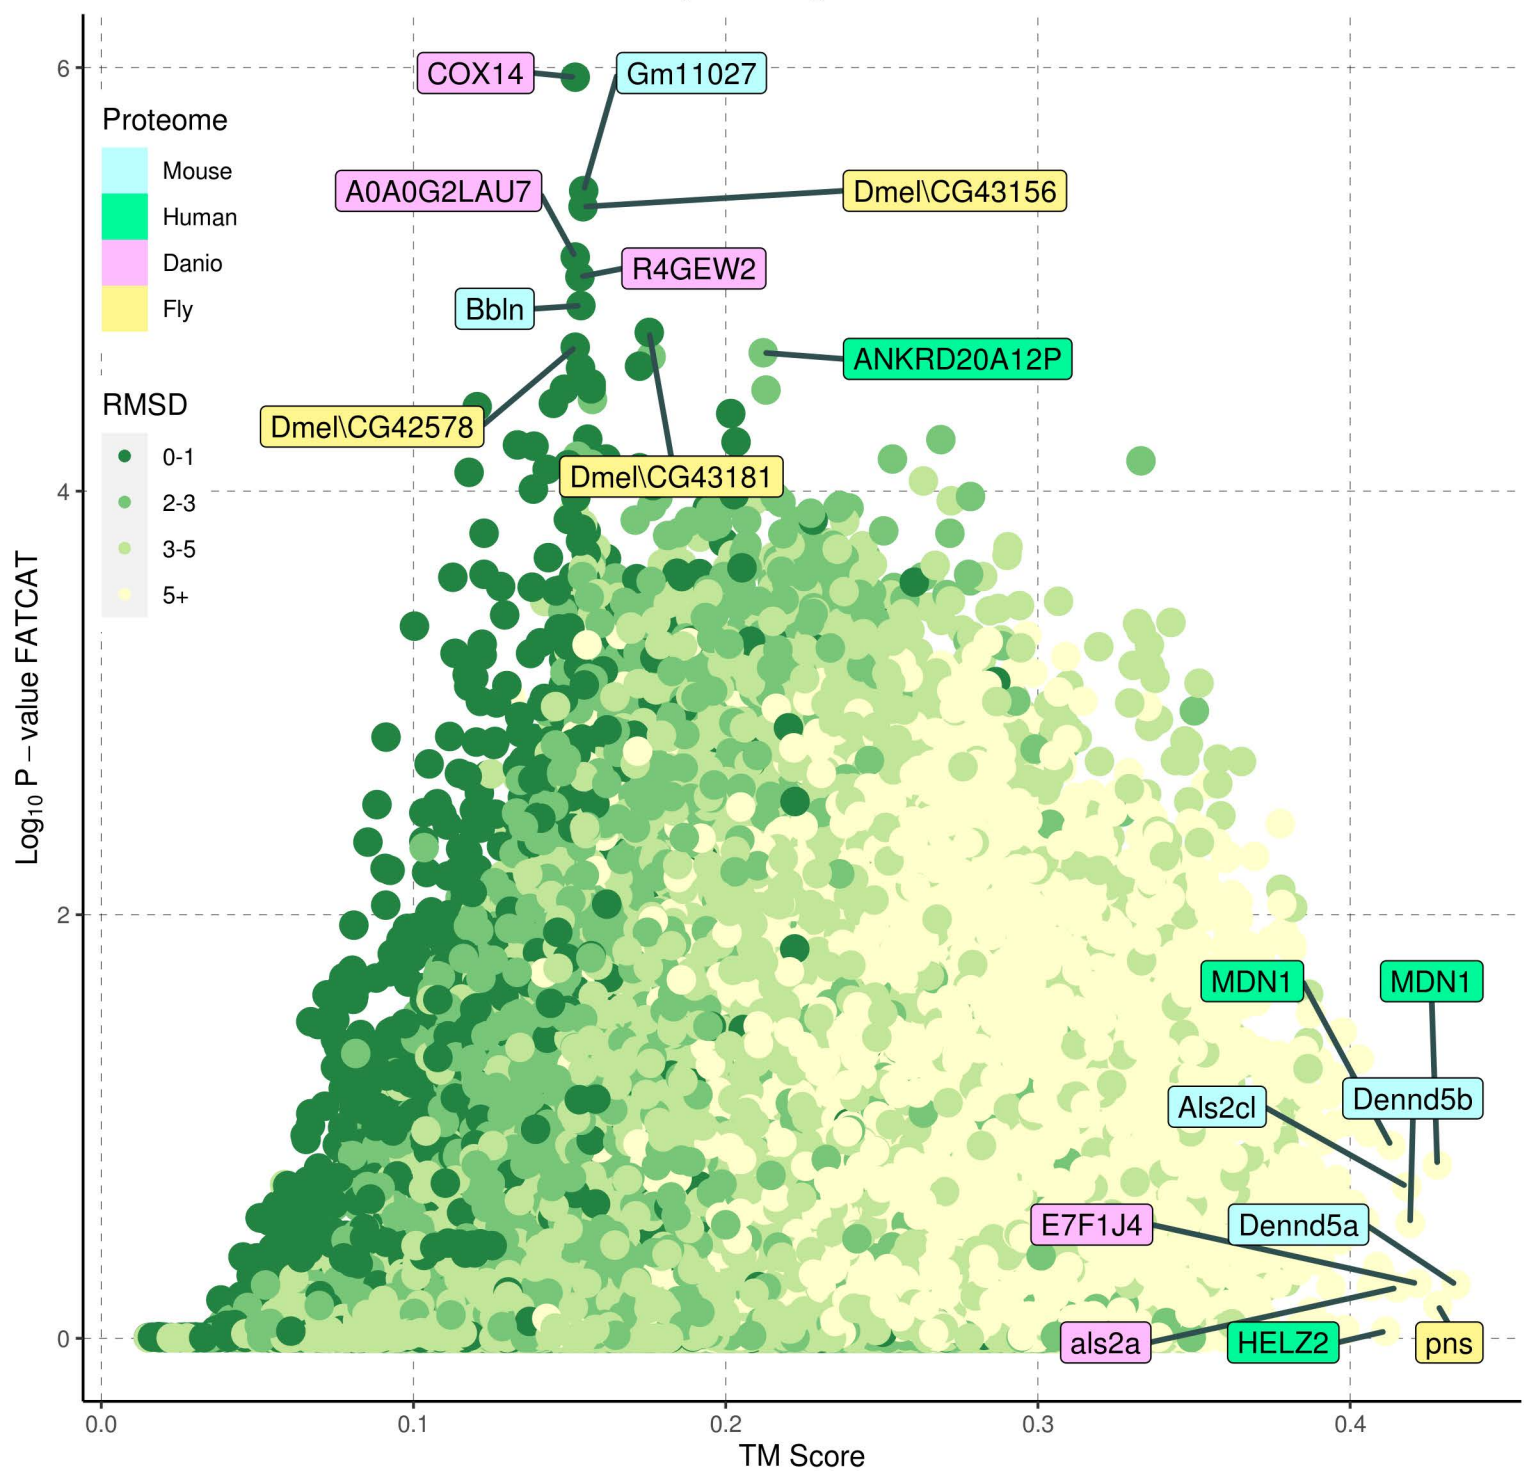

A7 : No hits, top-scoring values are indicated

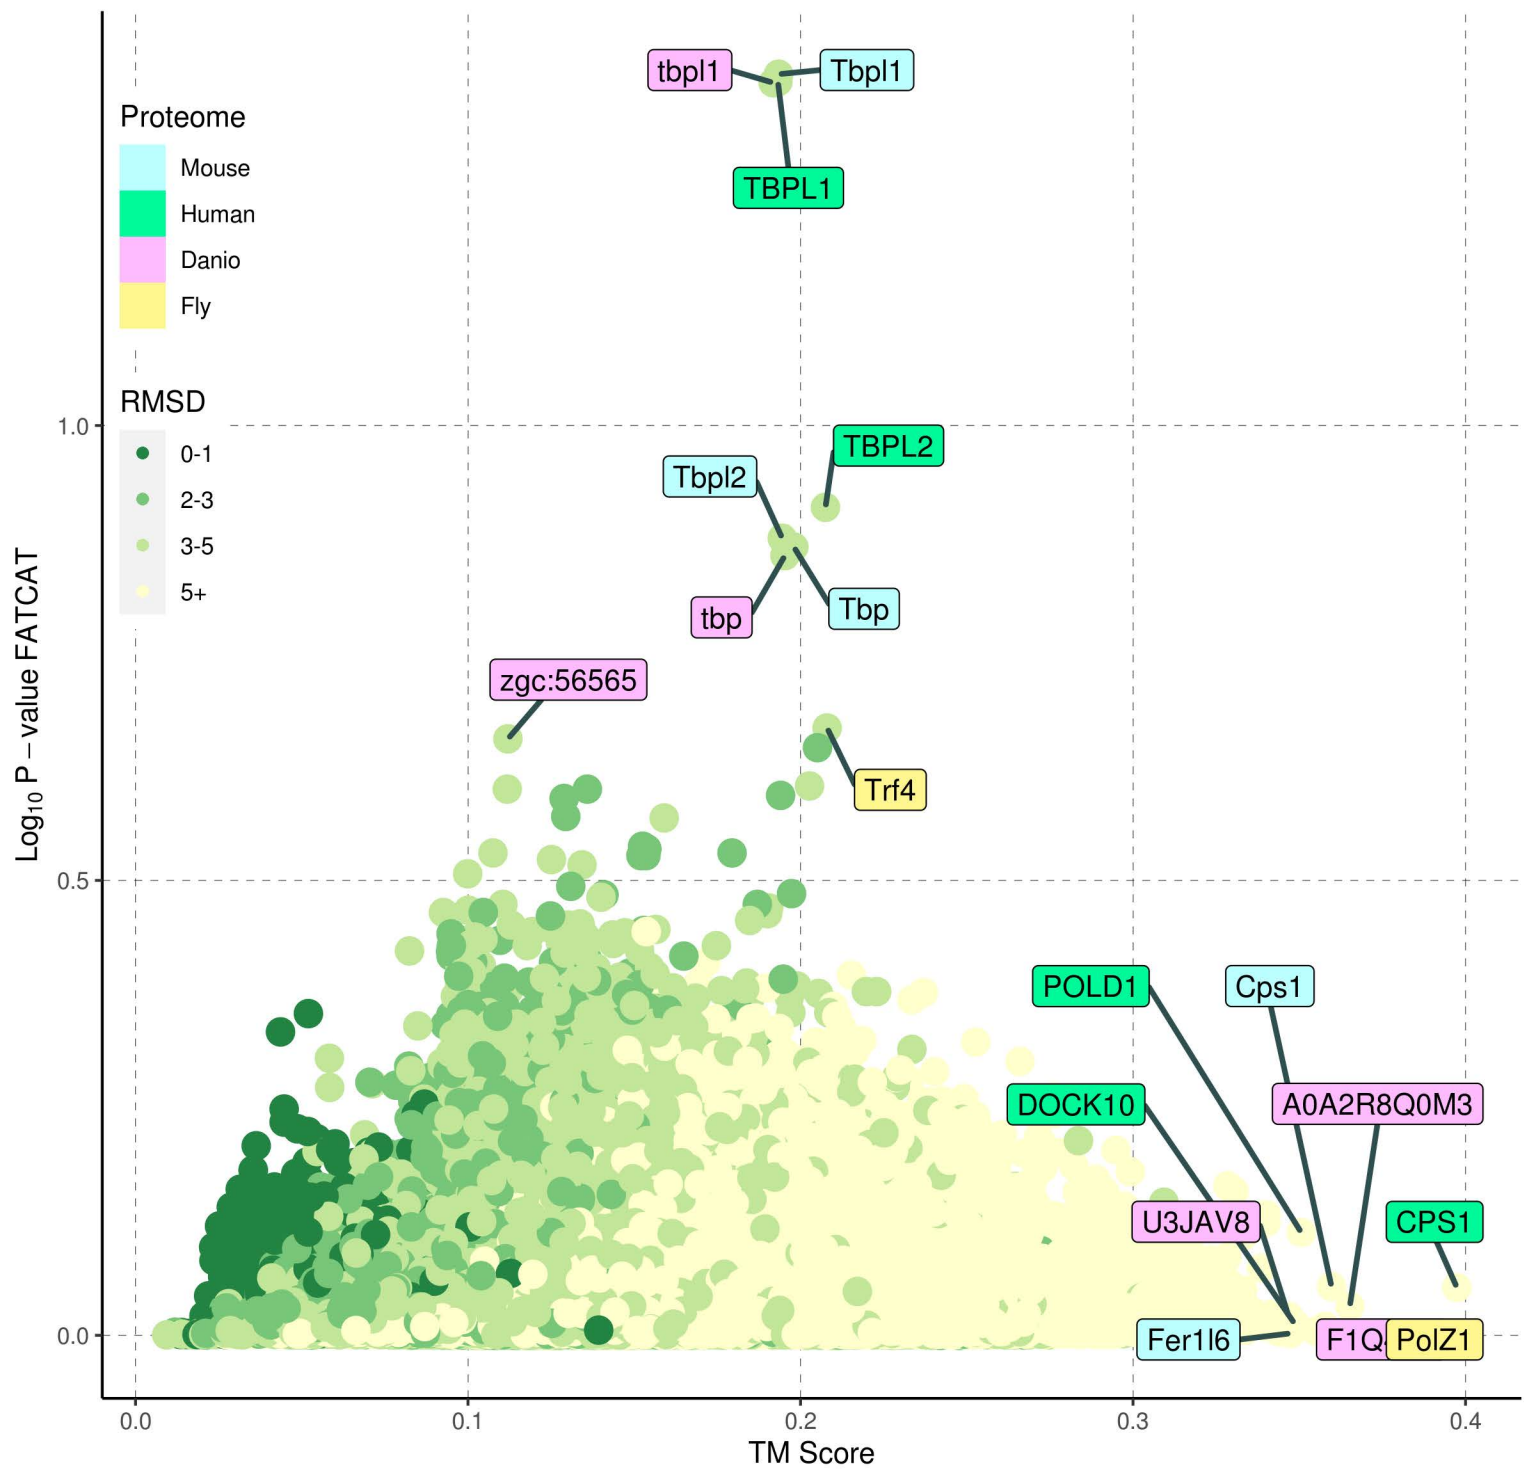

A8 : No hits, top-scoring values are indicated

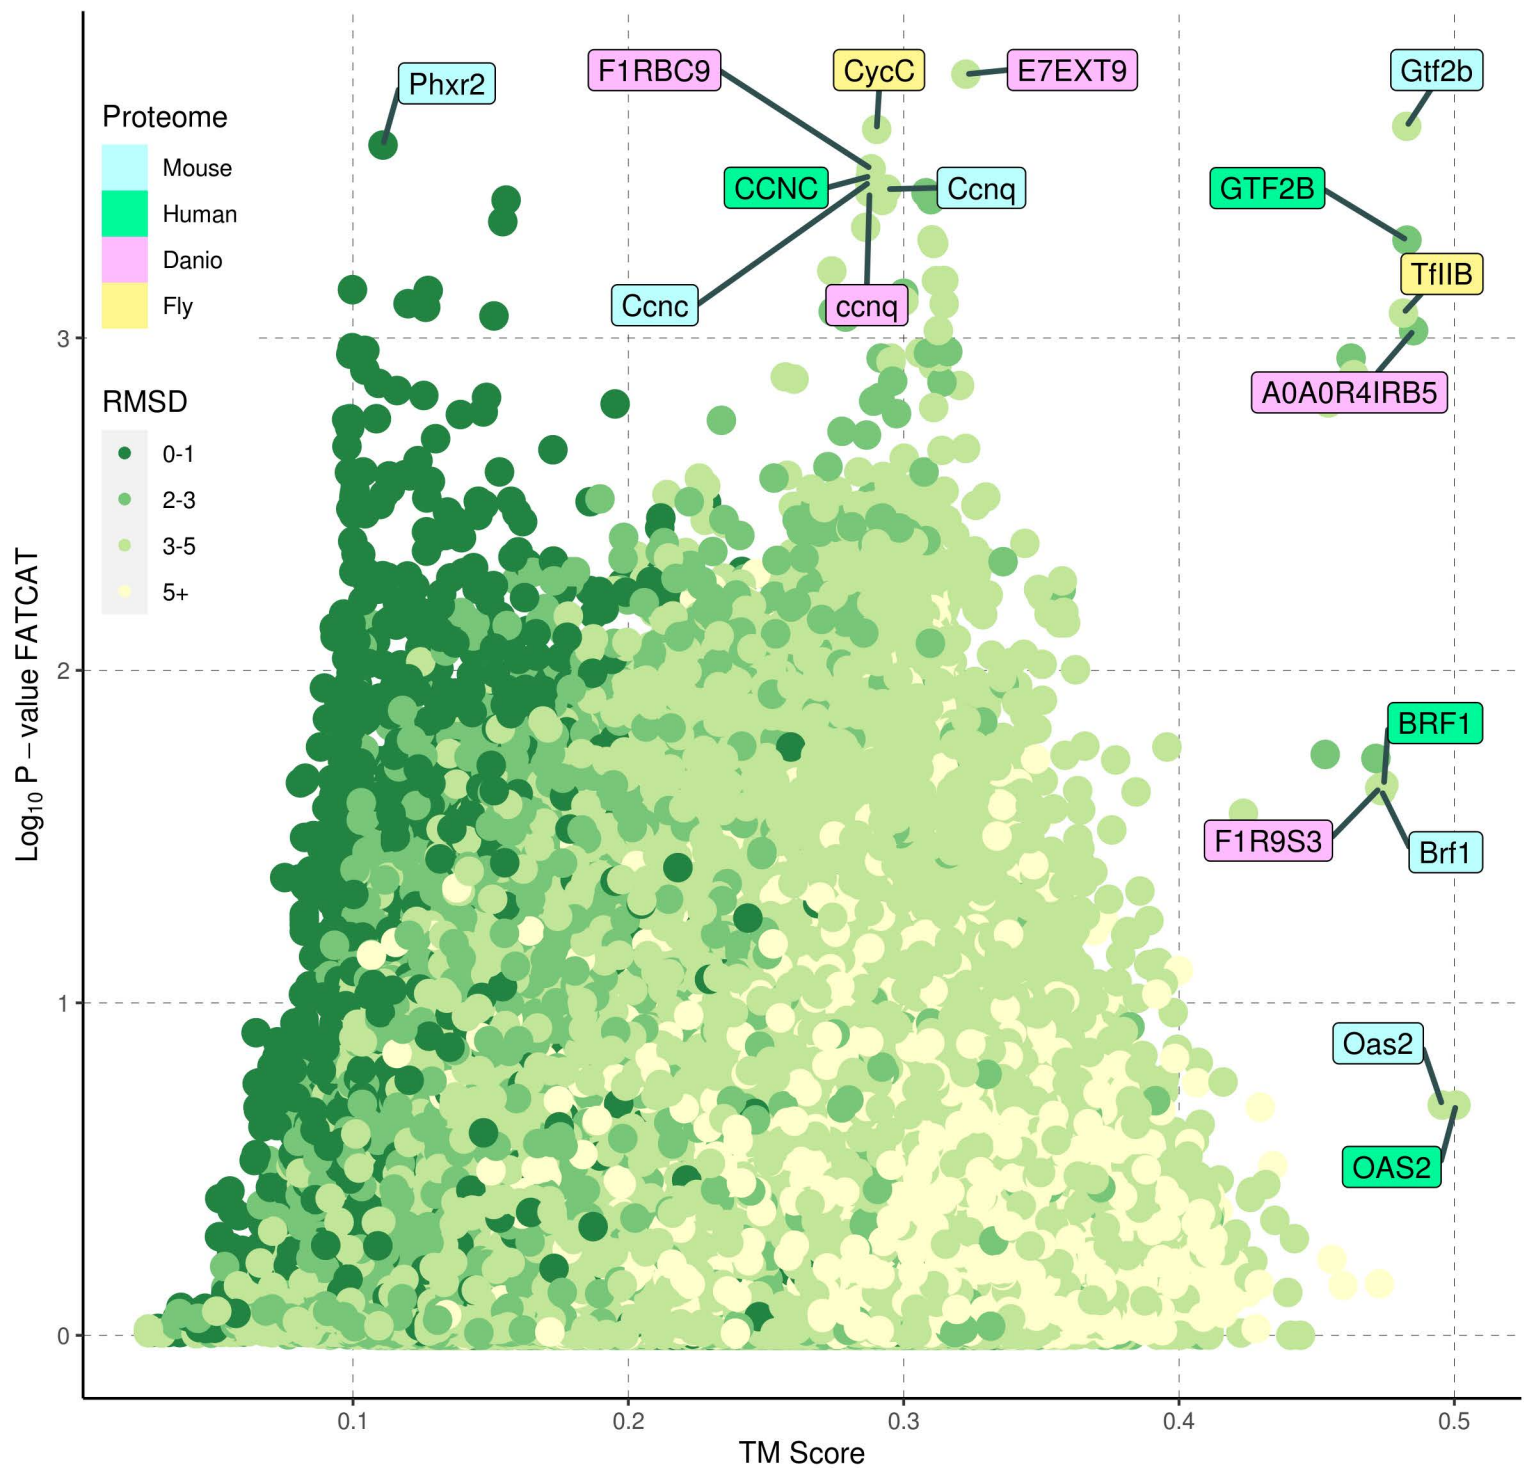

## A9

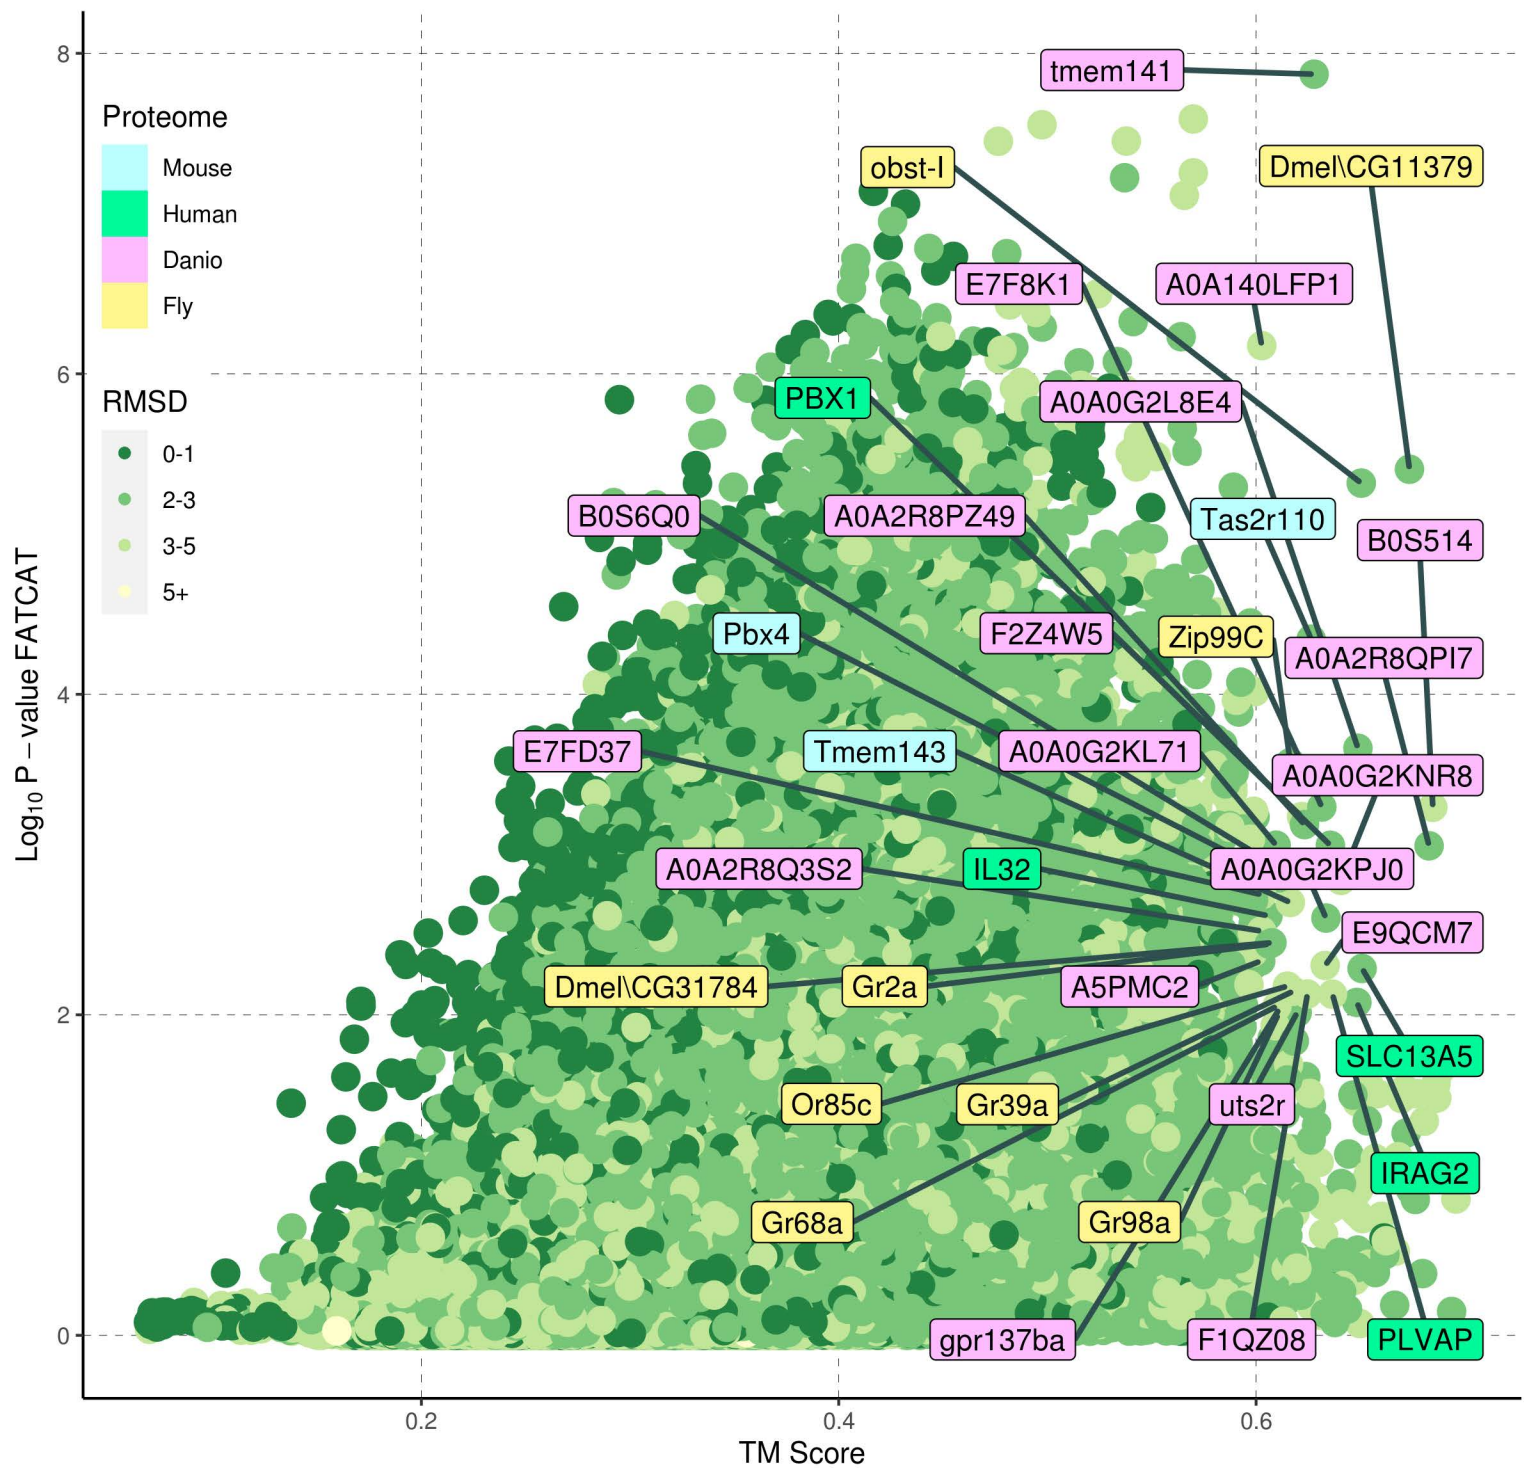

A10 : No hits, top-scoring values are indicated

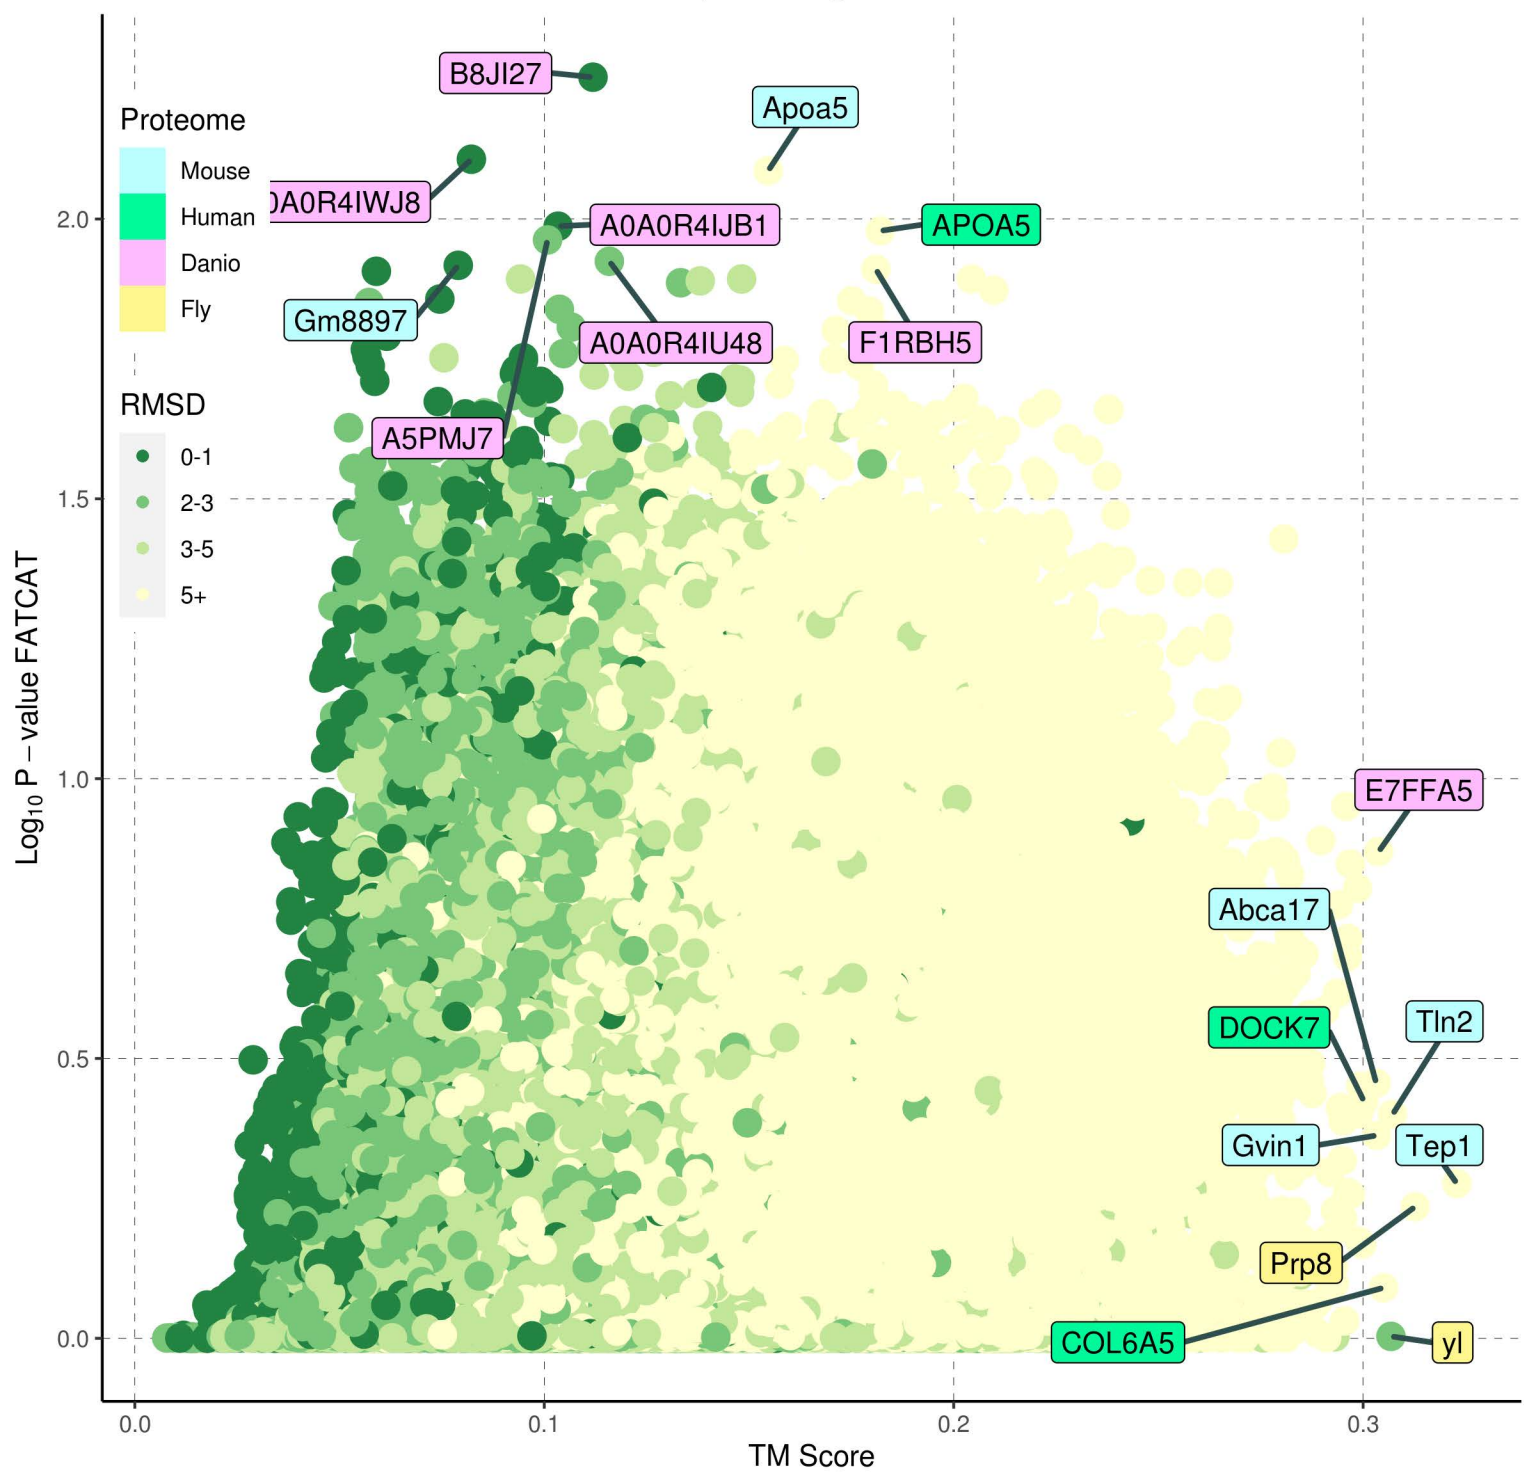



# A11 : No hits, top-scoring values are indicated

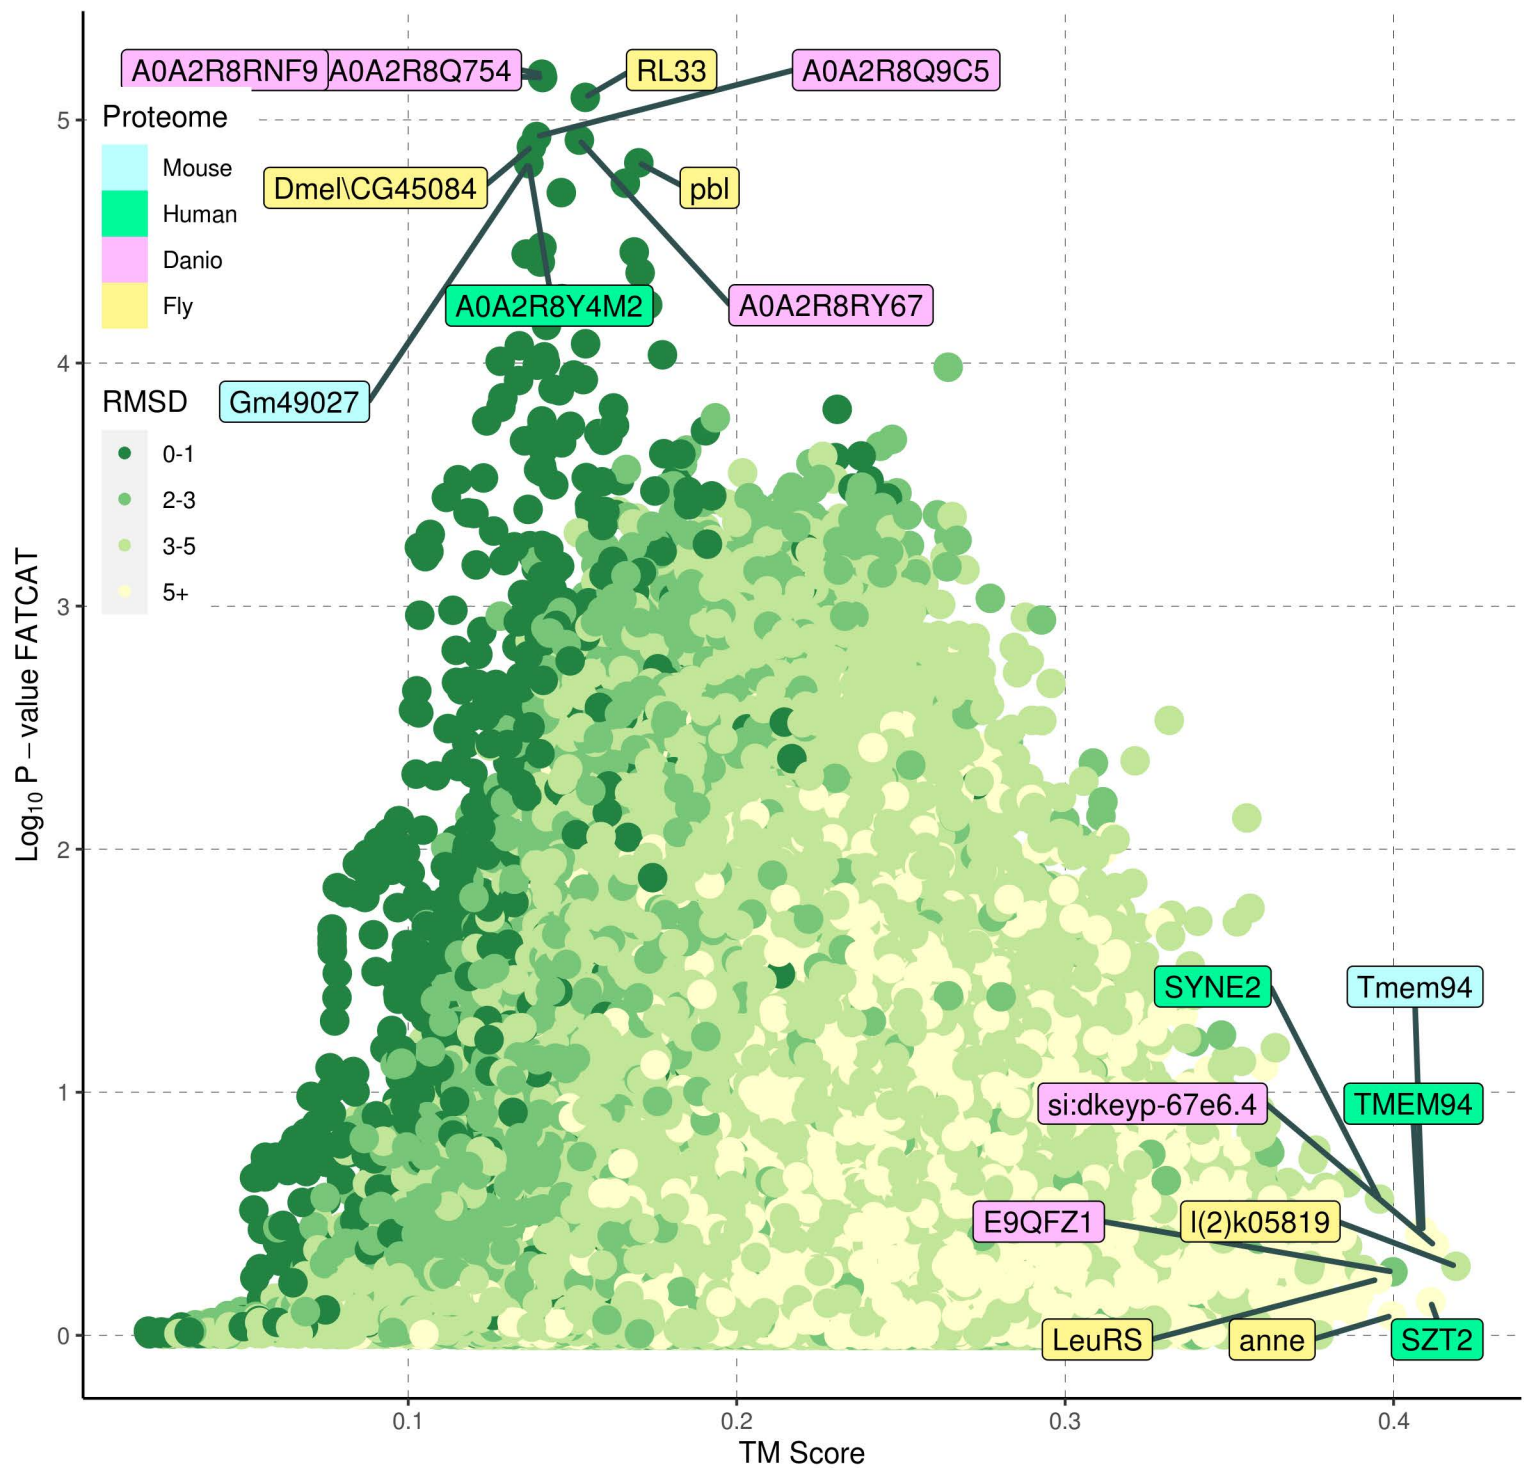

# A12 : No hits, top-scoring values are indicated

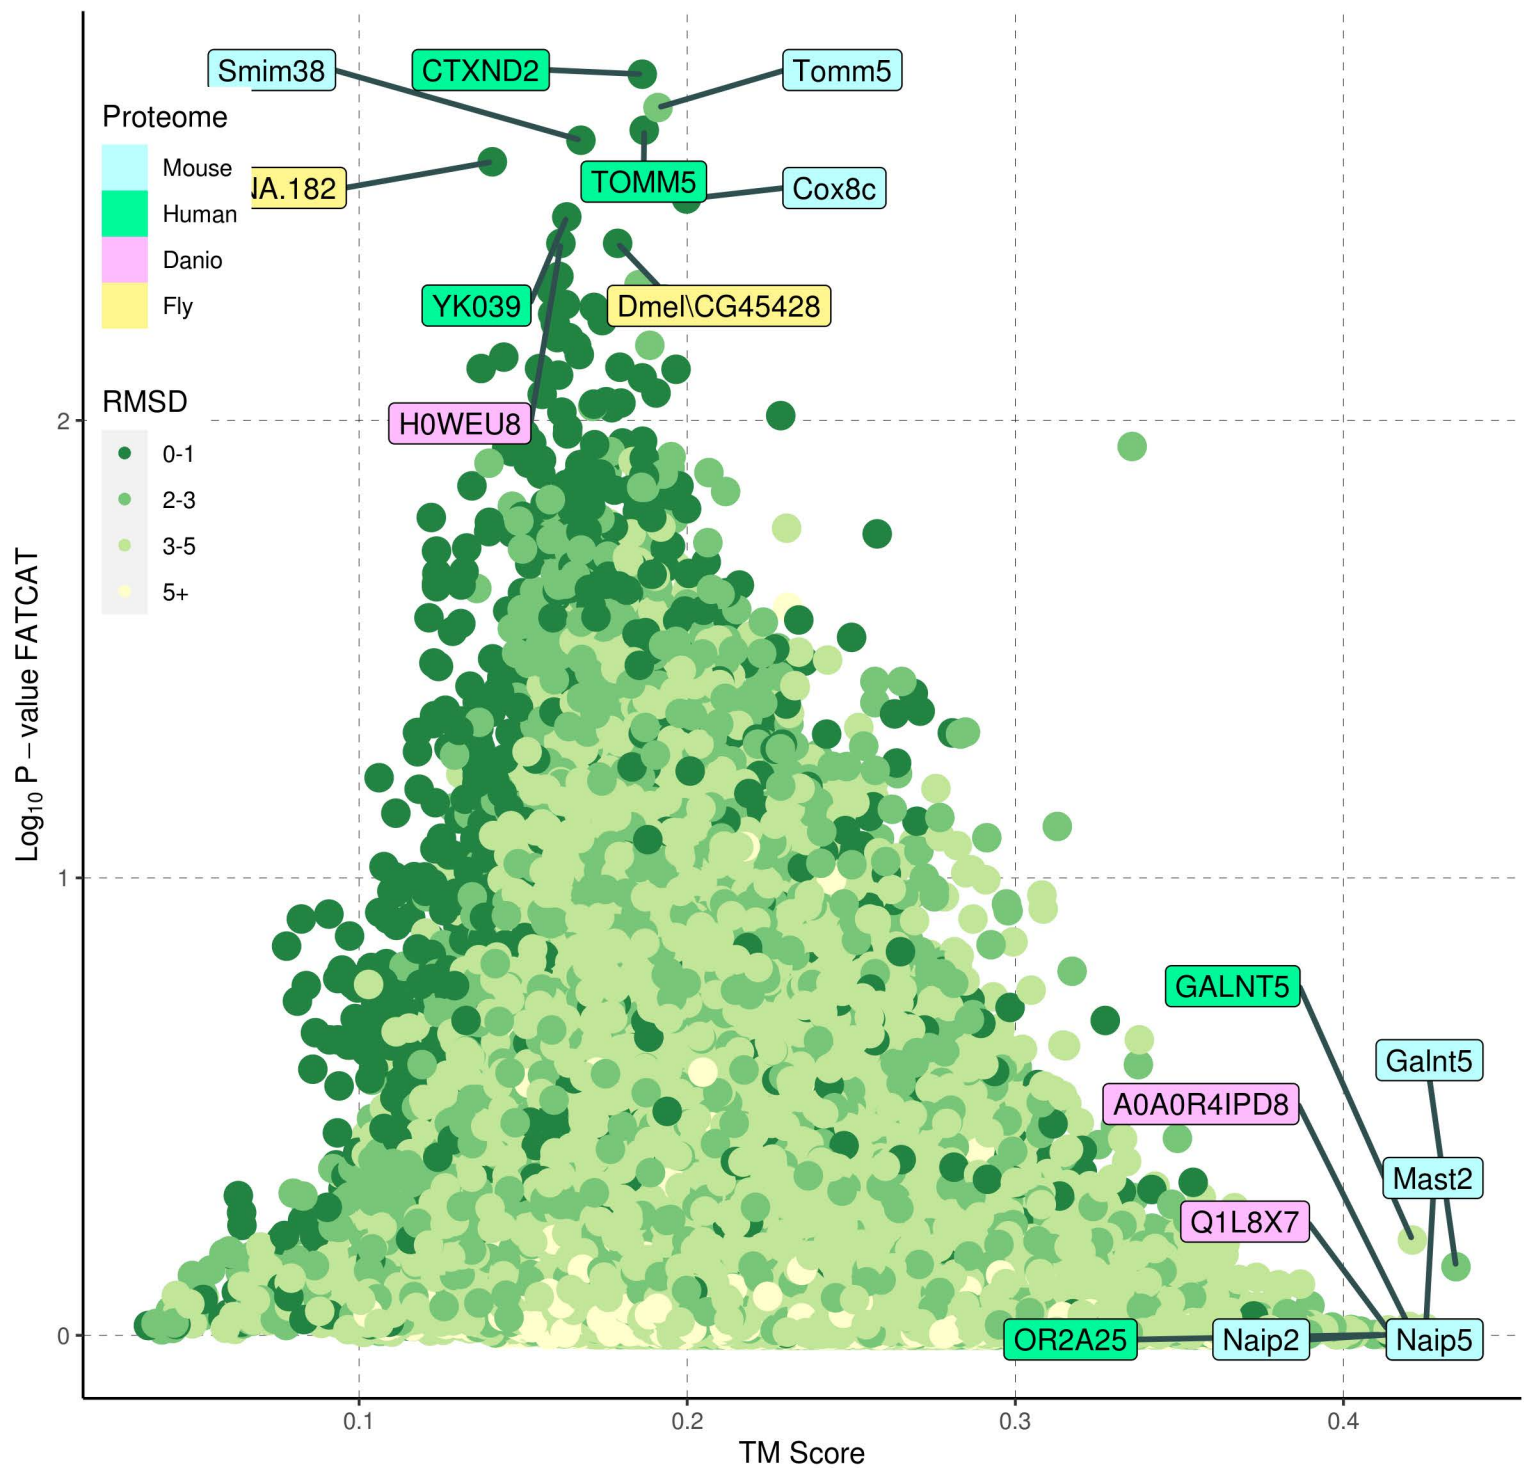

## A13

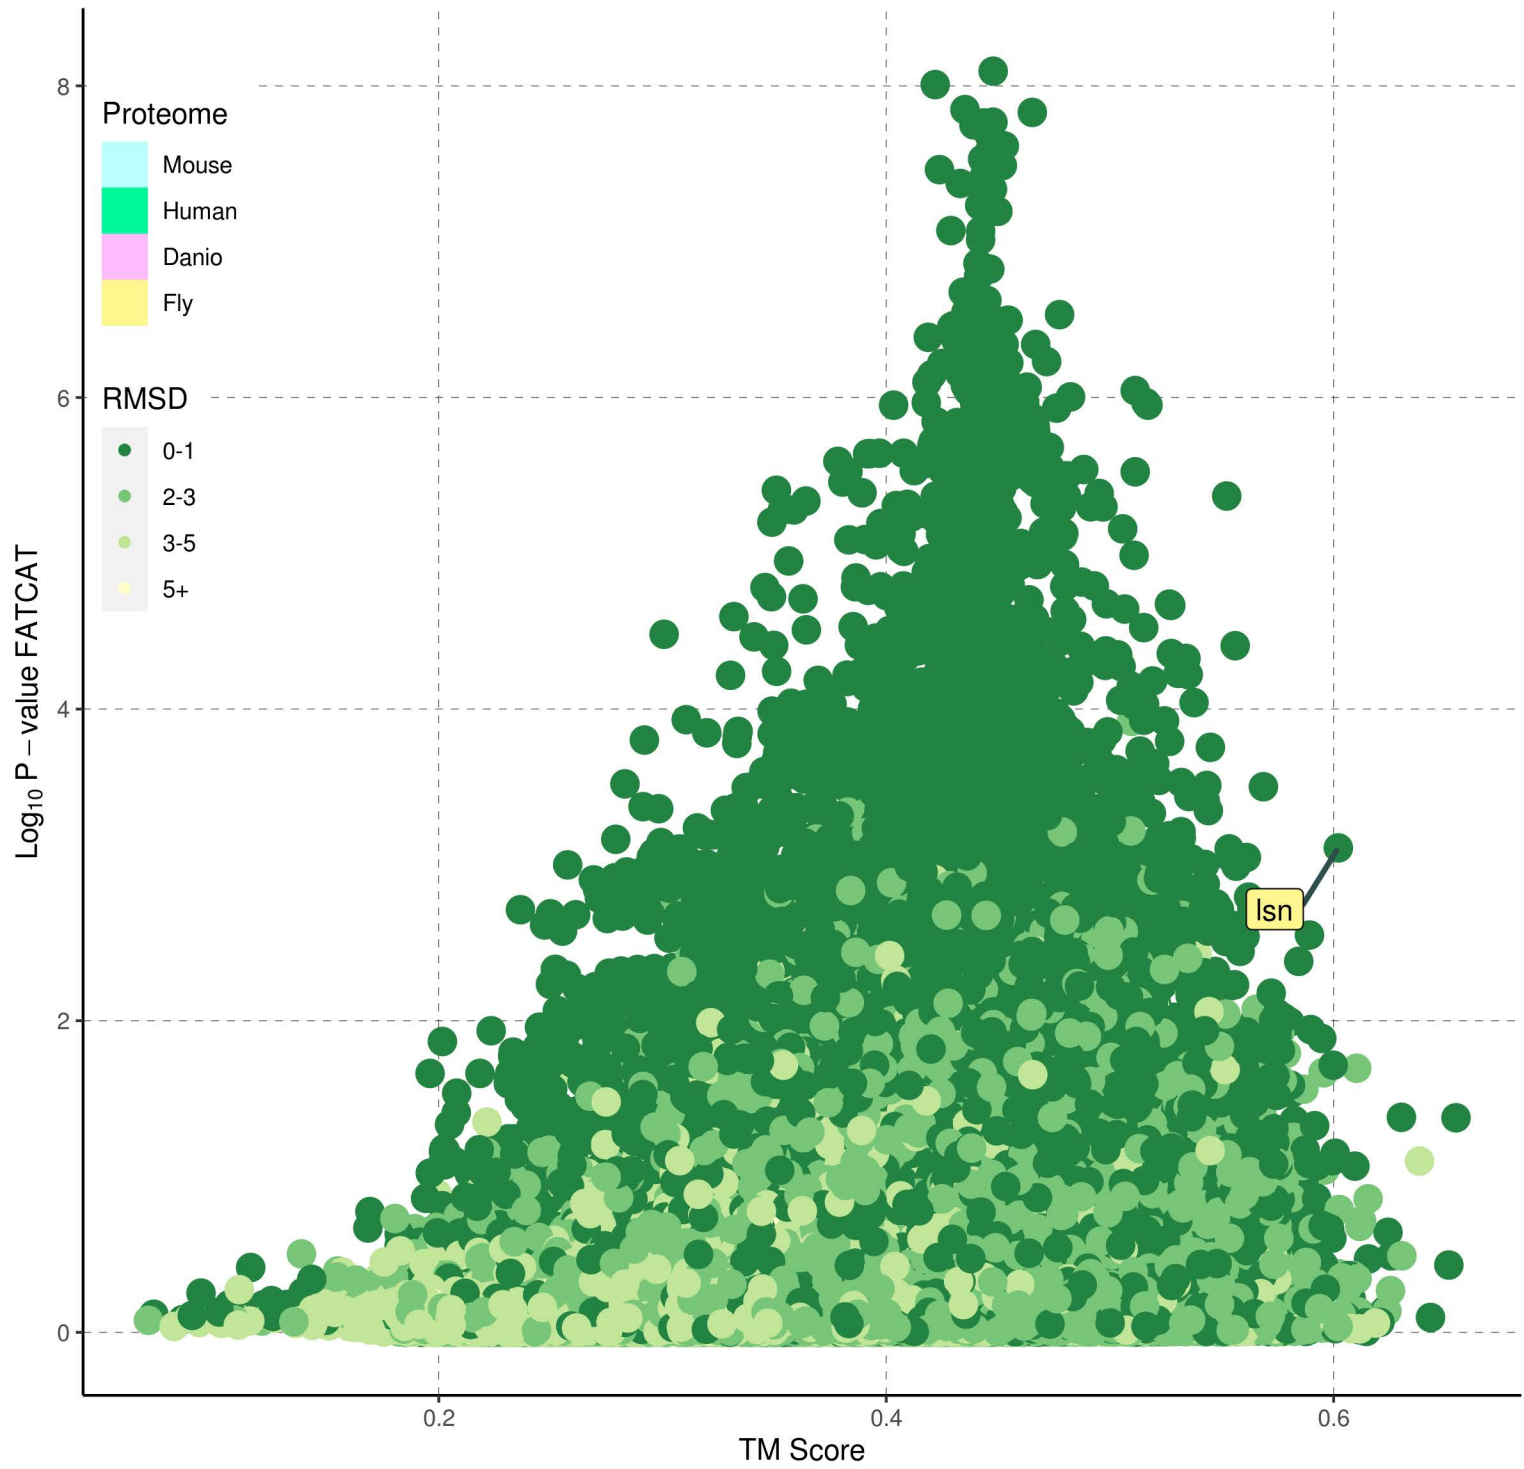





A15 : No hits, top-scoring values are indicated

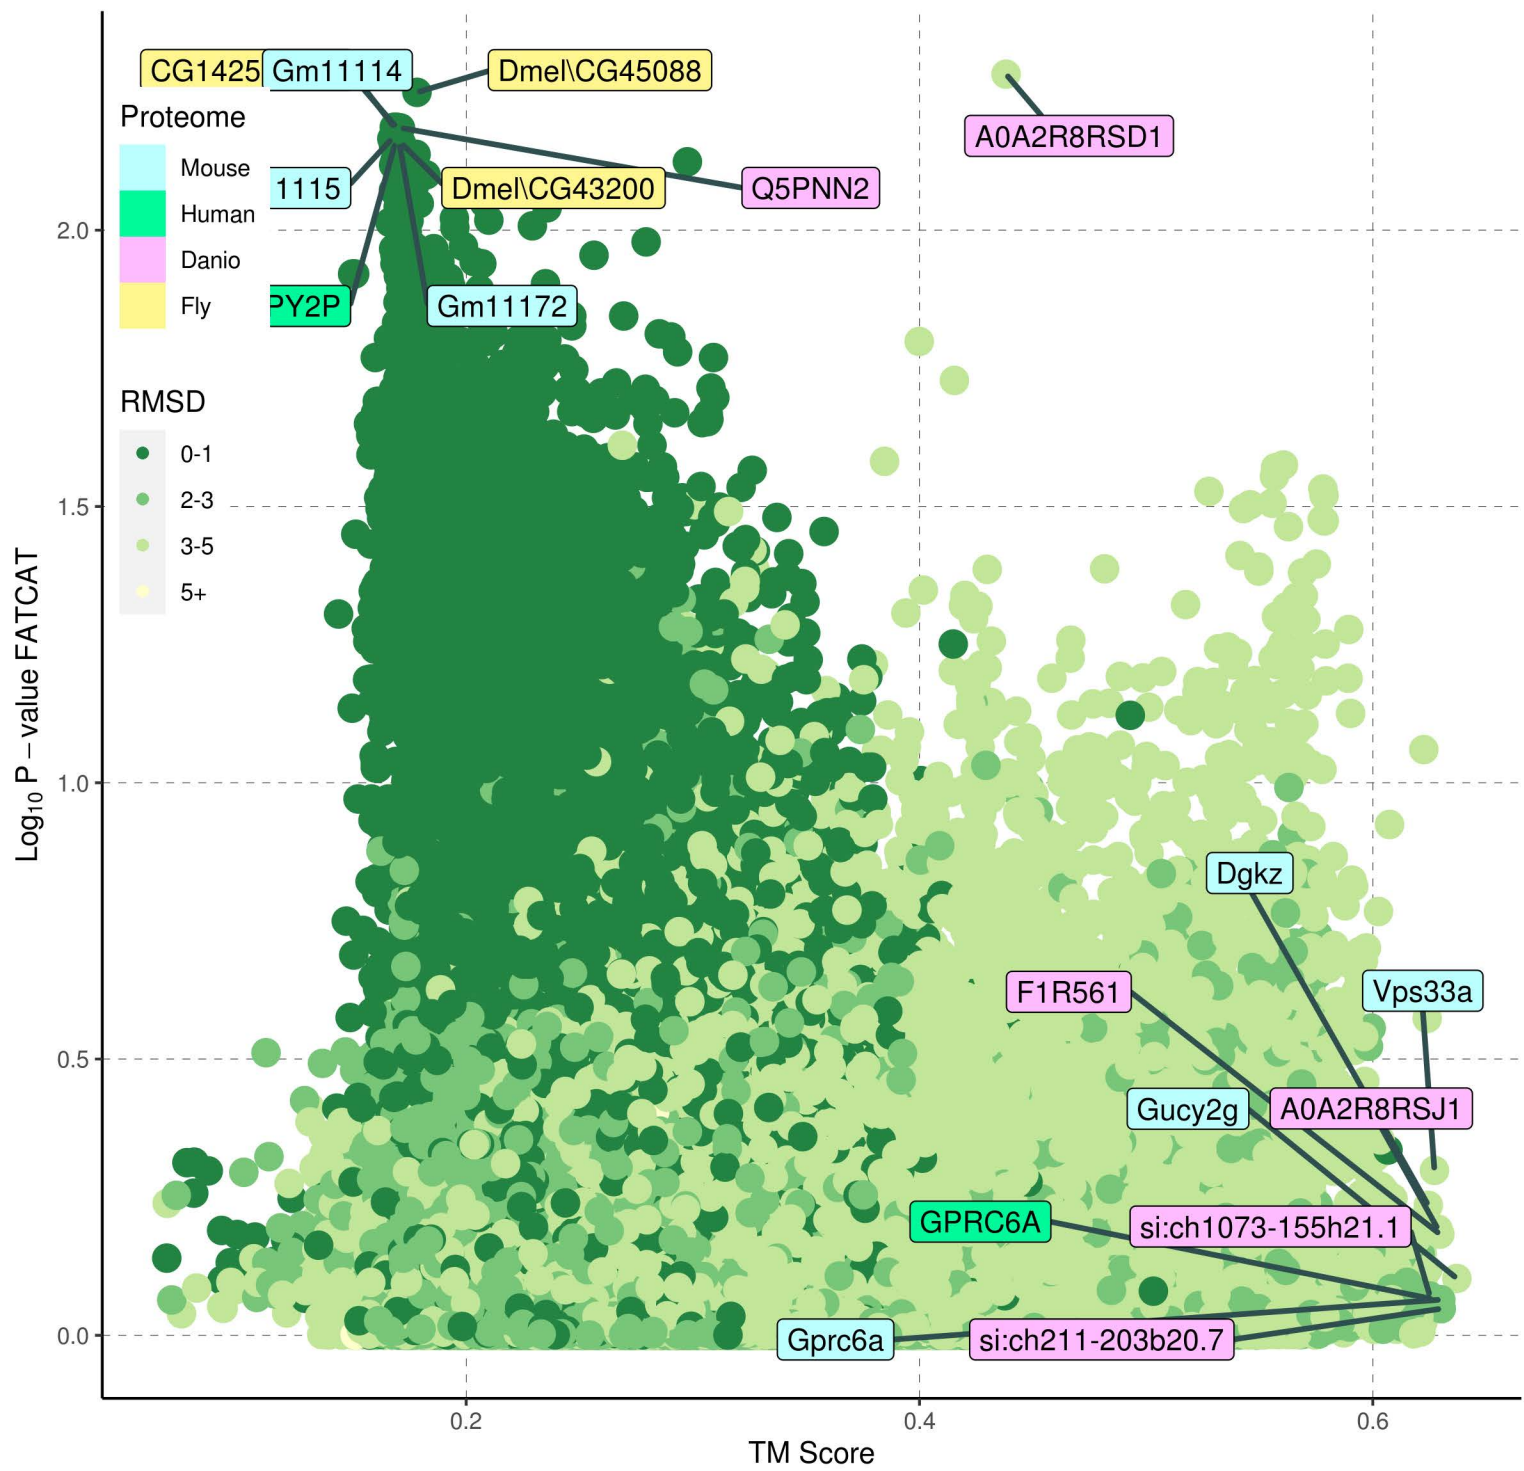

A16 : No hits, top-scoring values are indicated

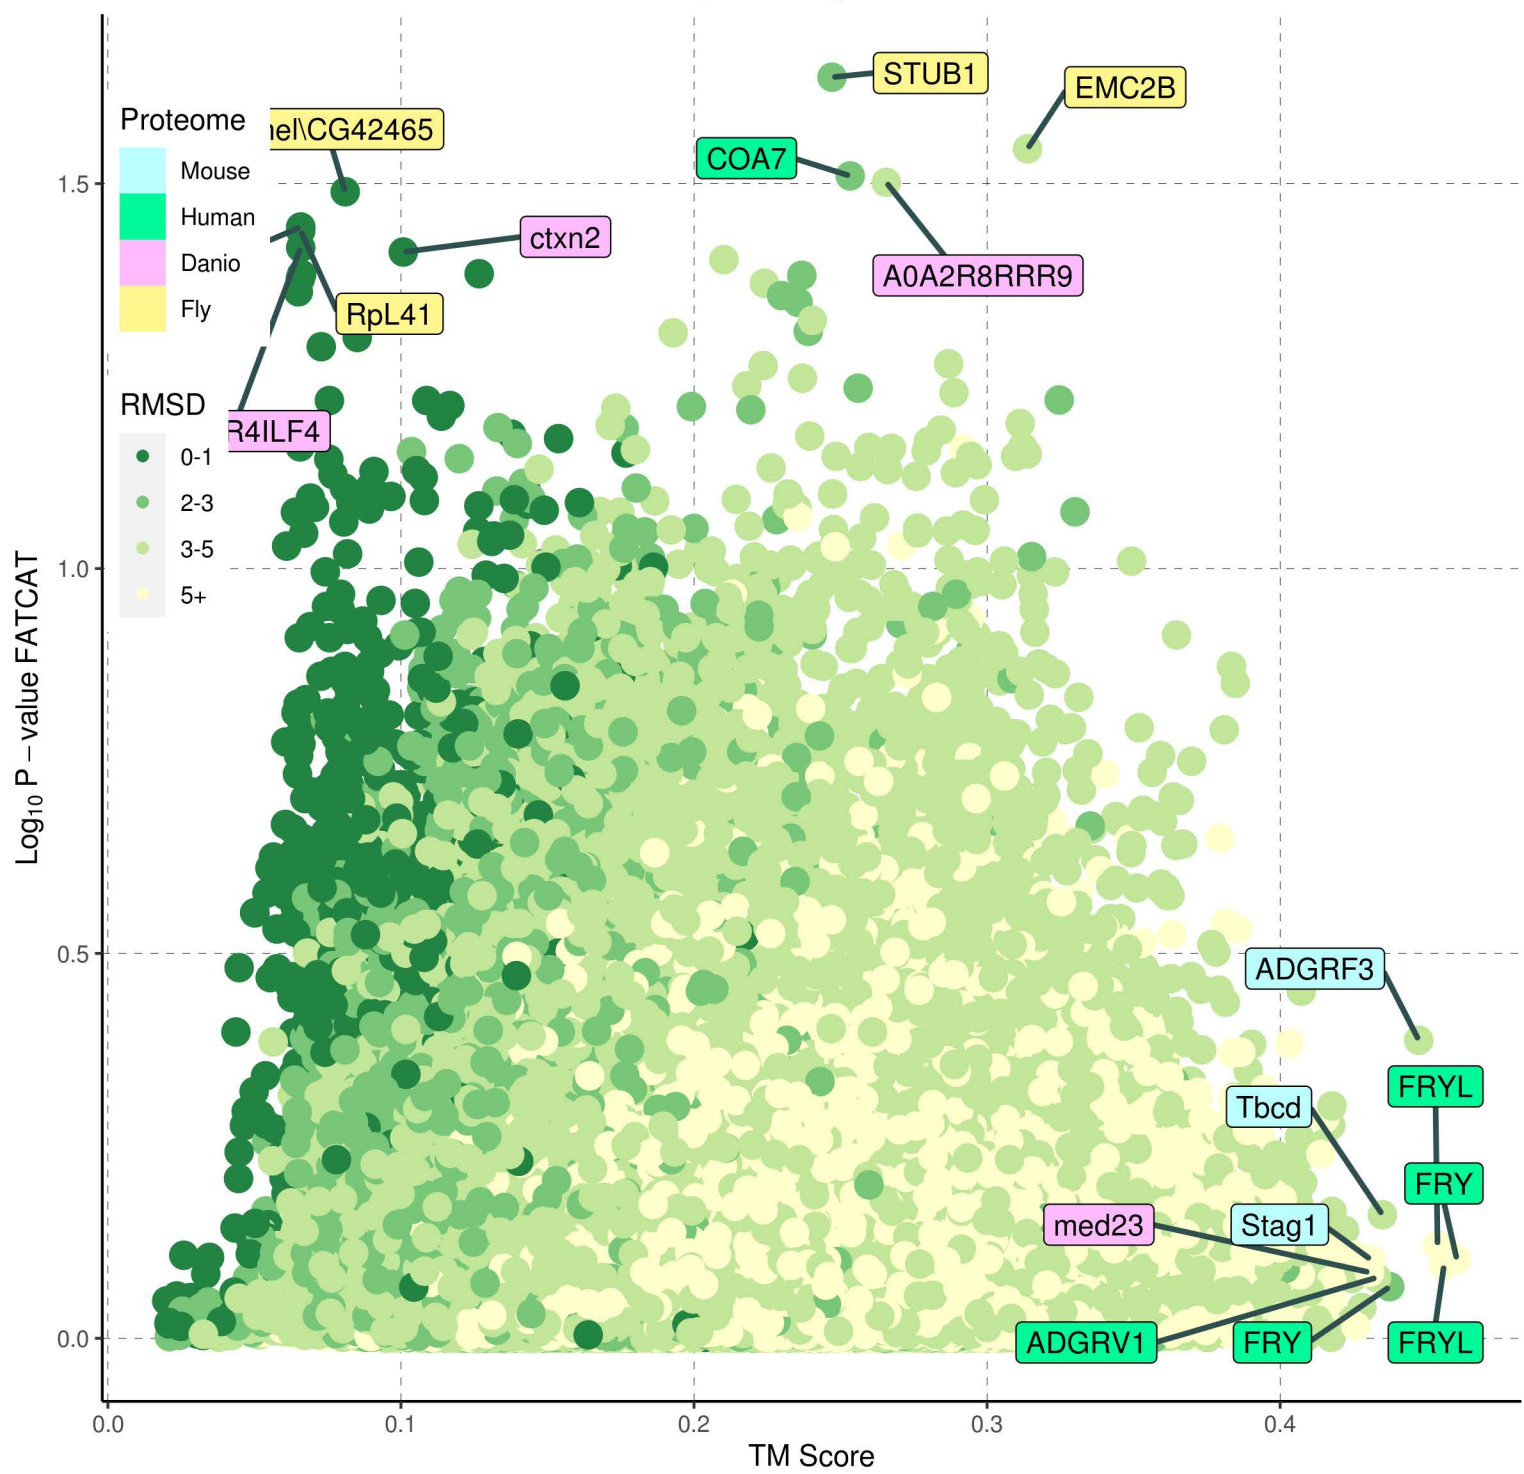

A17 : No hits, top-scoring values are indicated

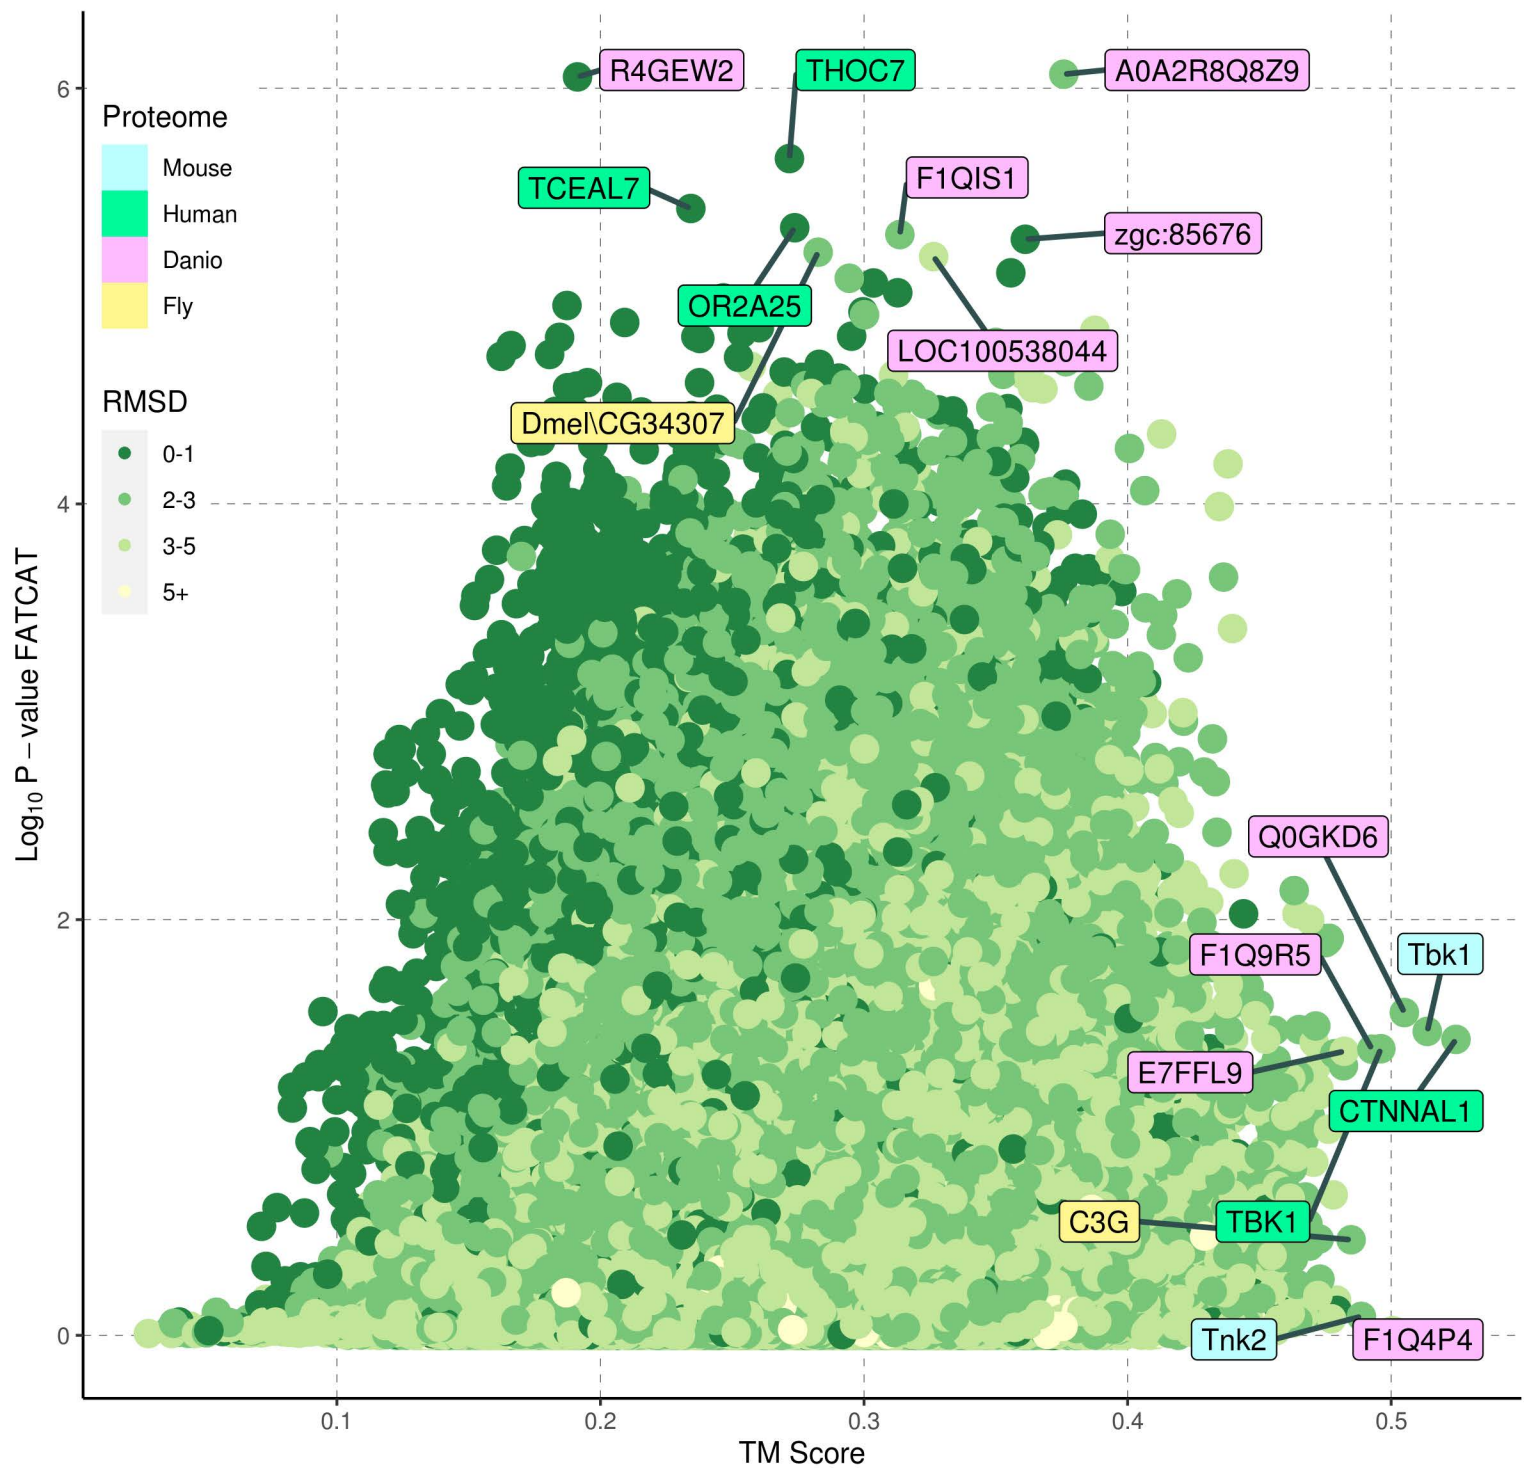





A19 : No hits, top-scoring values are indicated

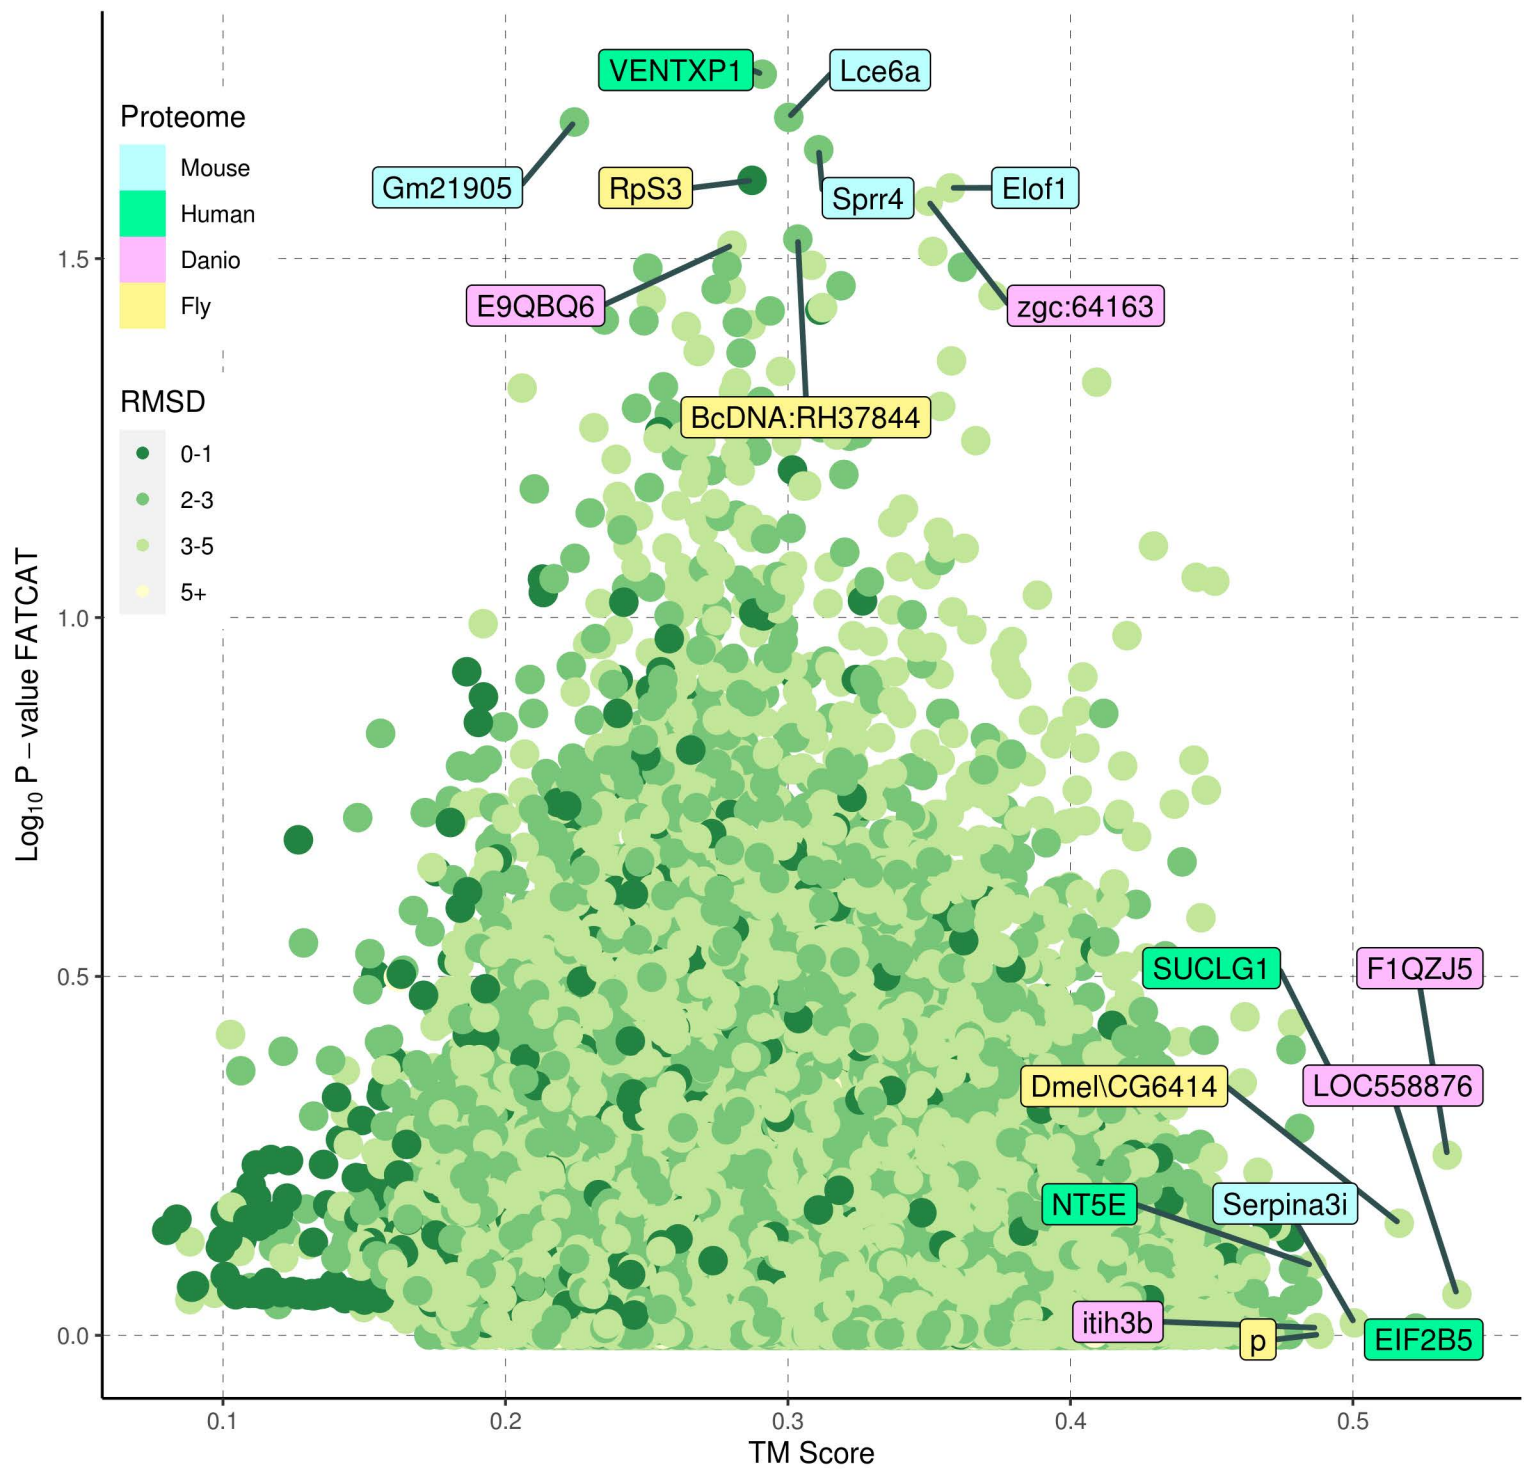

A20 : No hits, top-scoring values are indicated

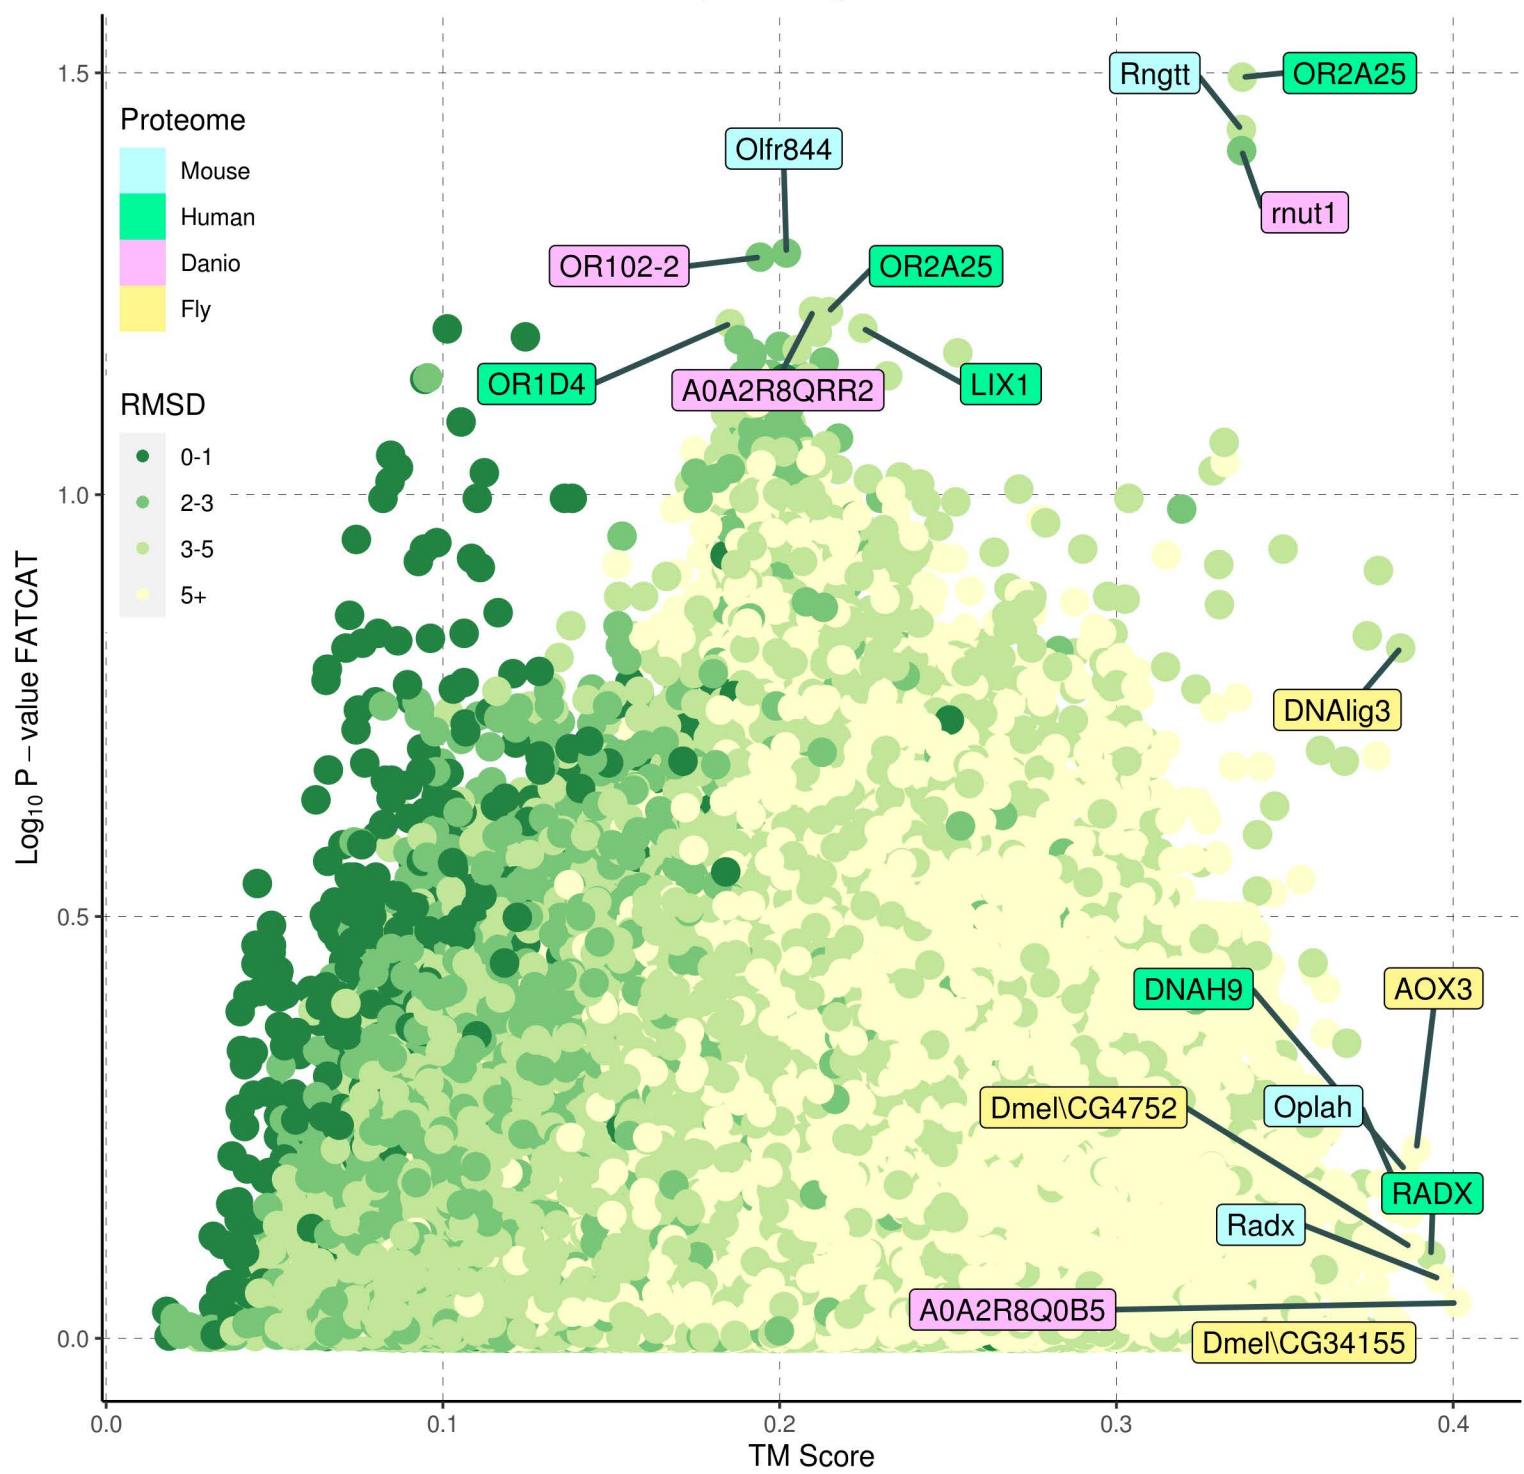

A21 : No hits, top-scoring values are indicated

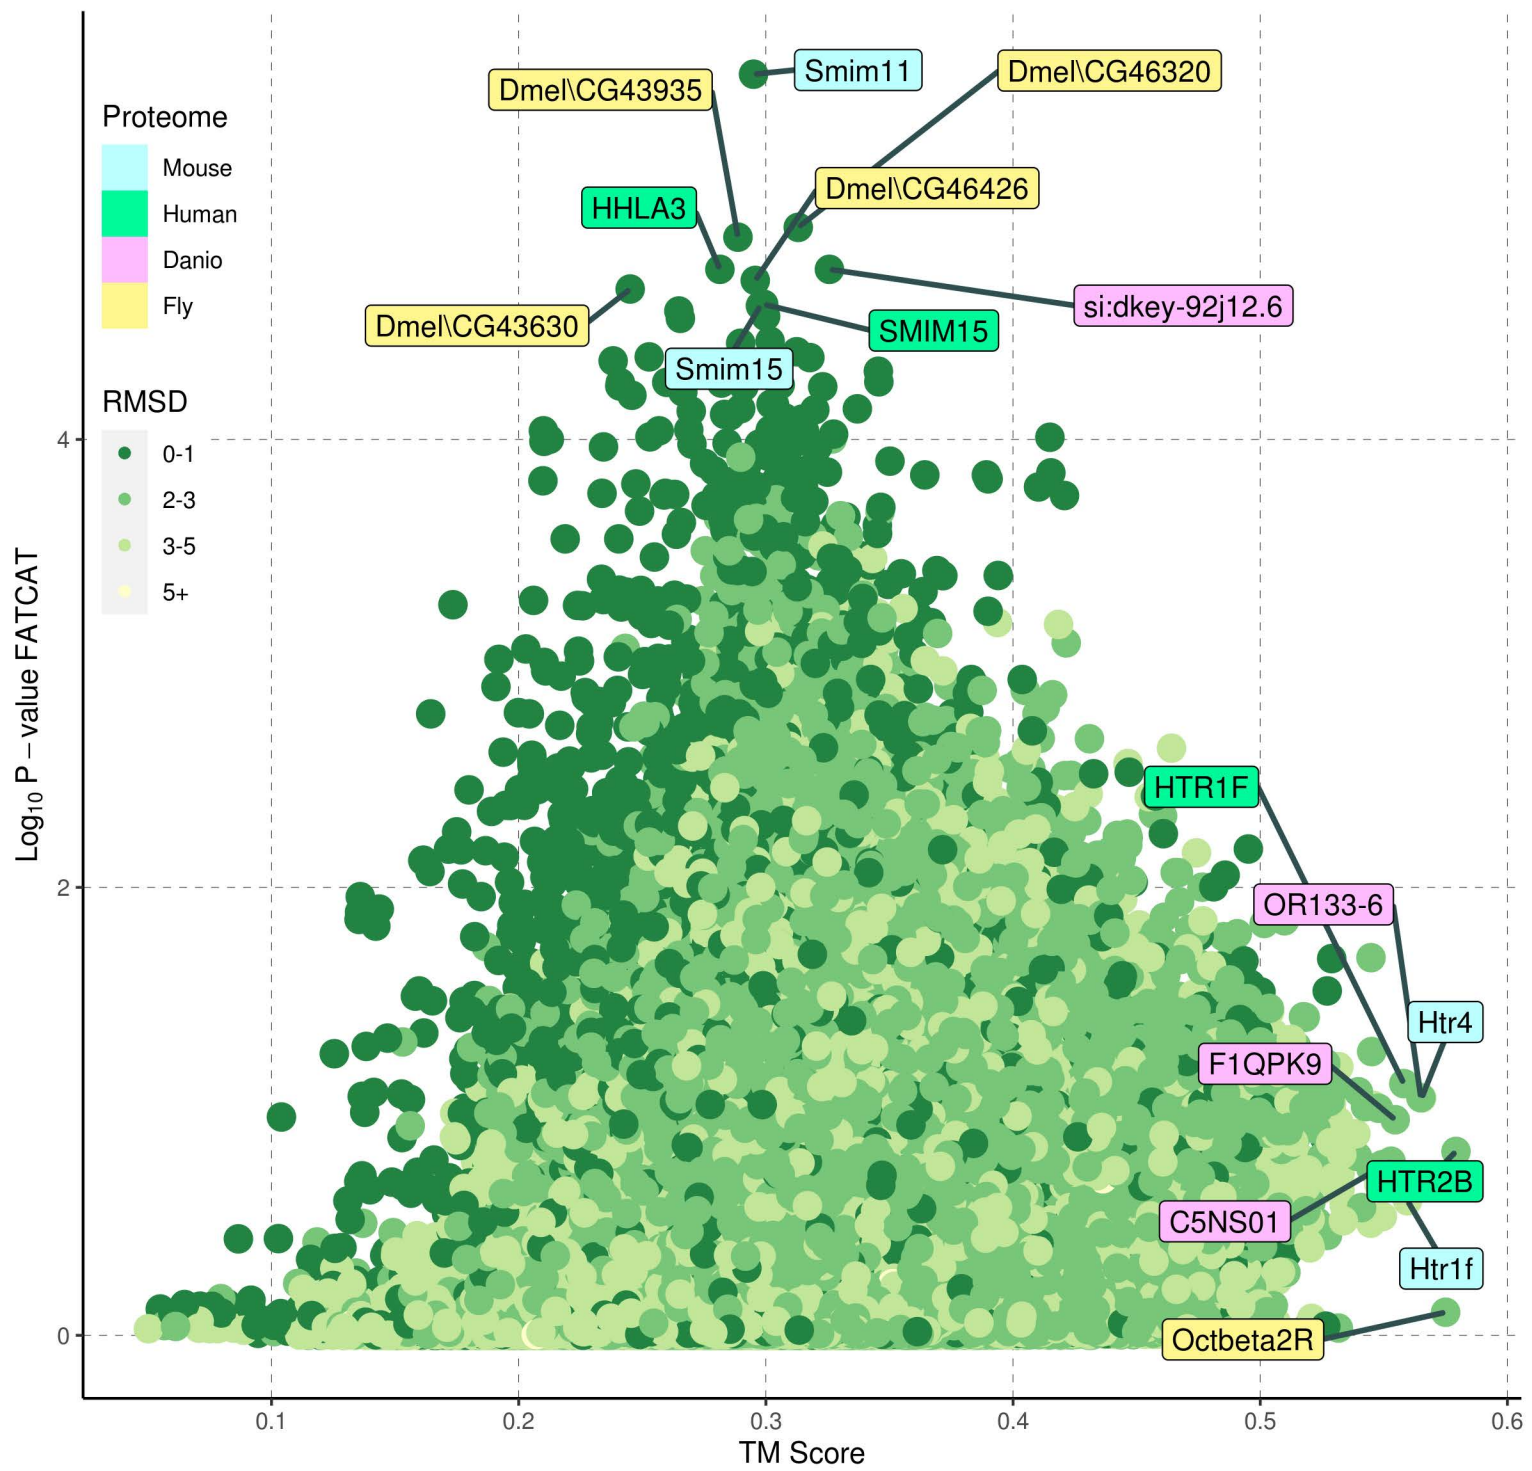

## A22

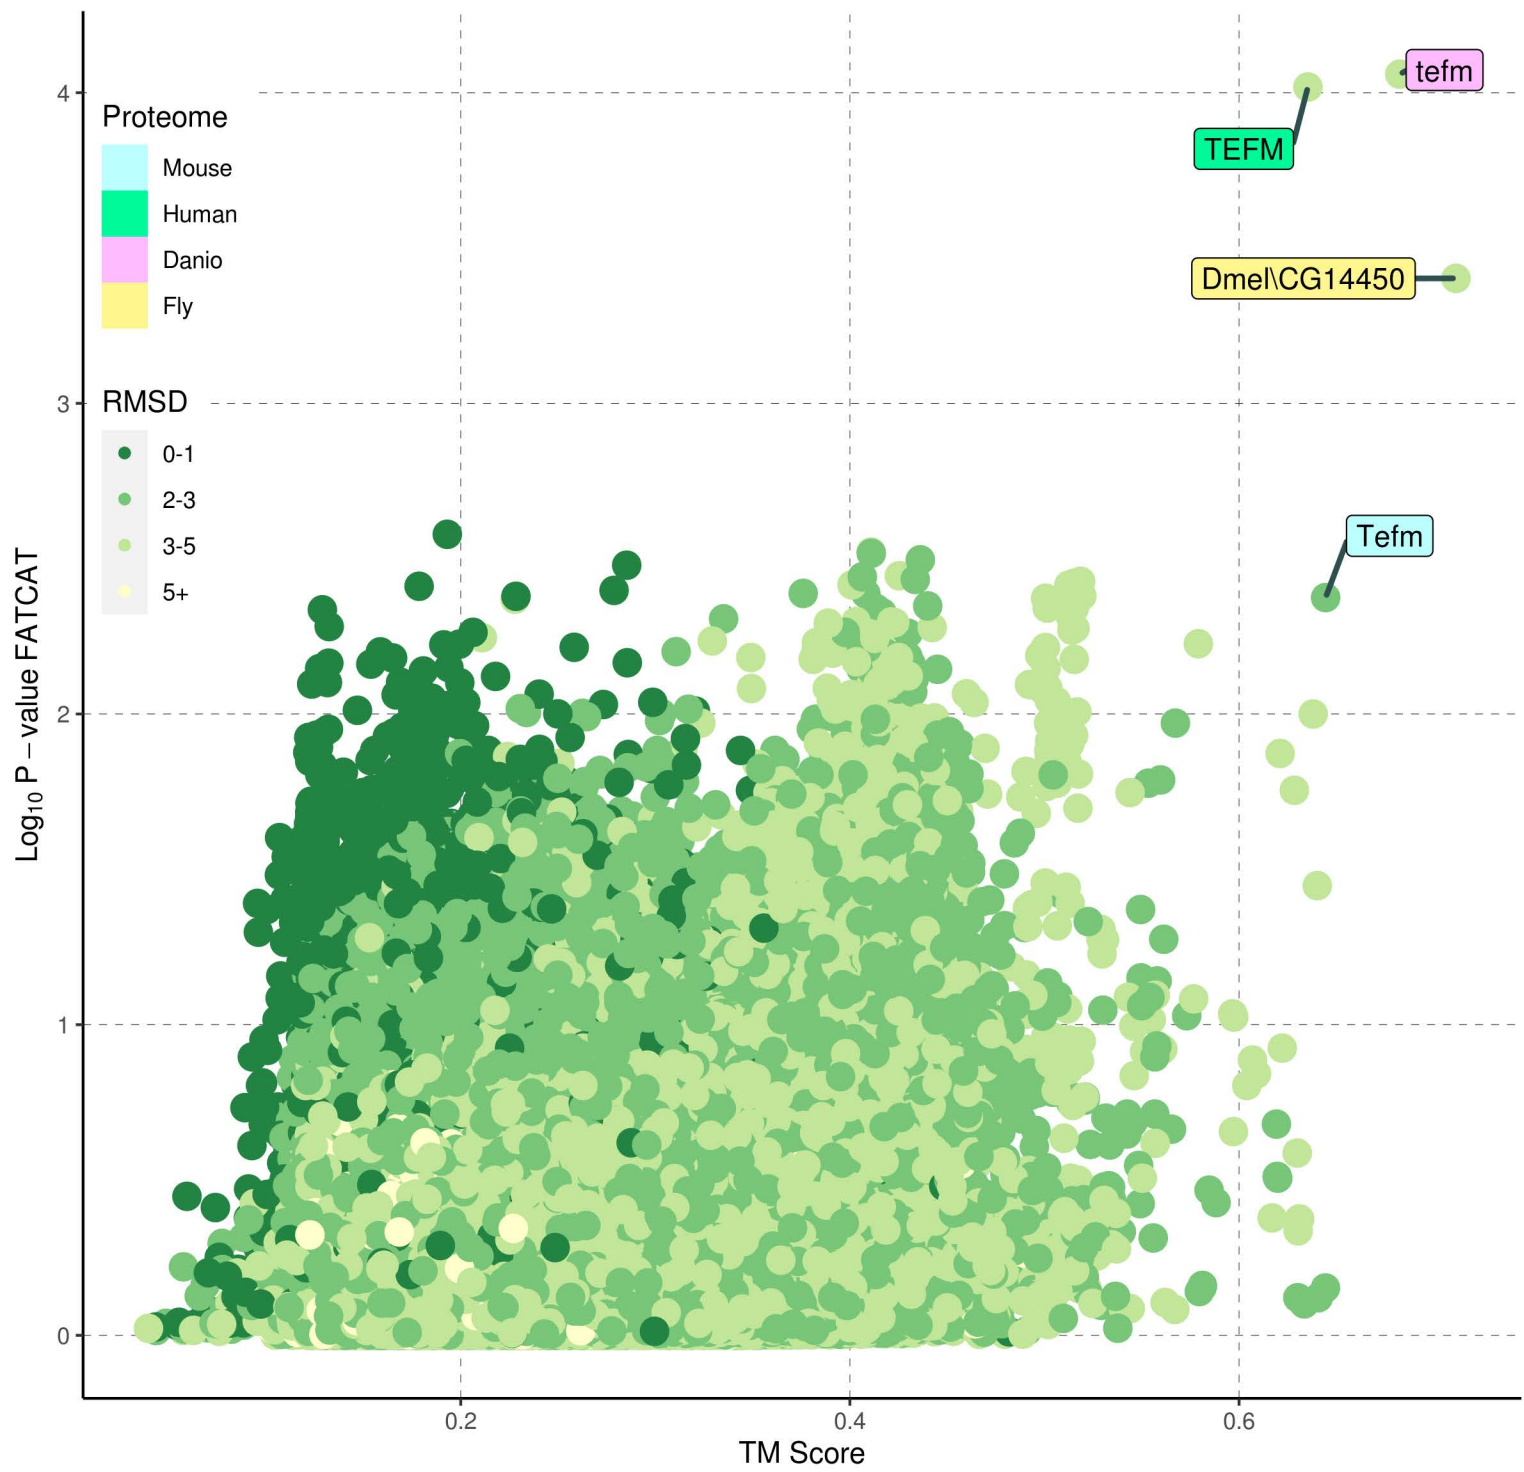

# A23 : No hits, top-scoring values are indicated

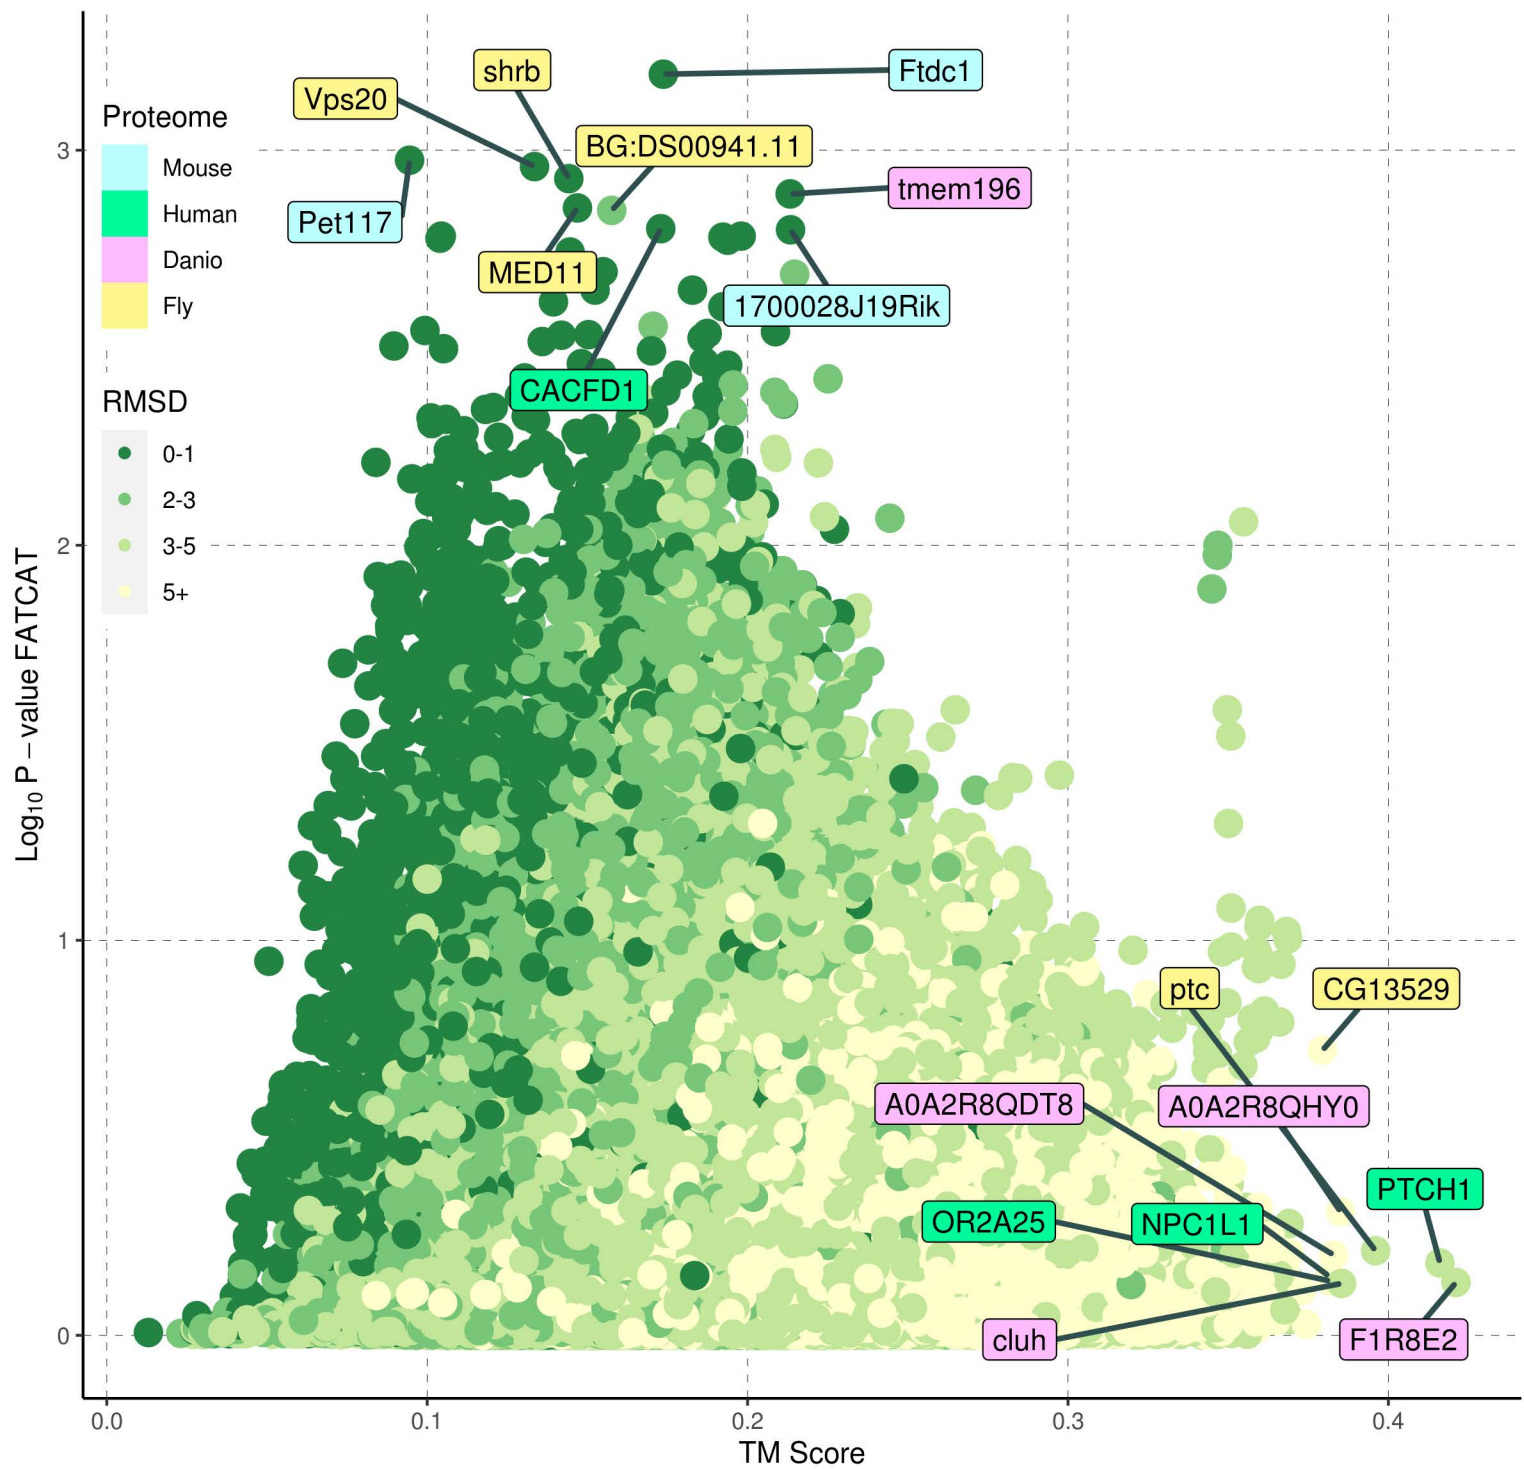

A24

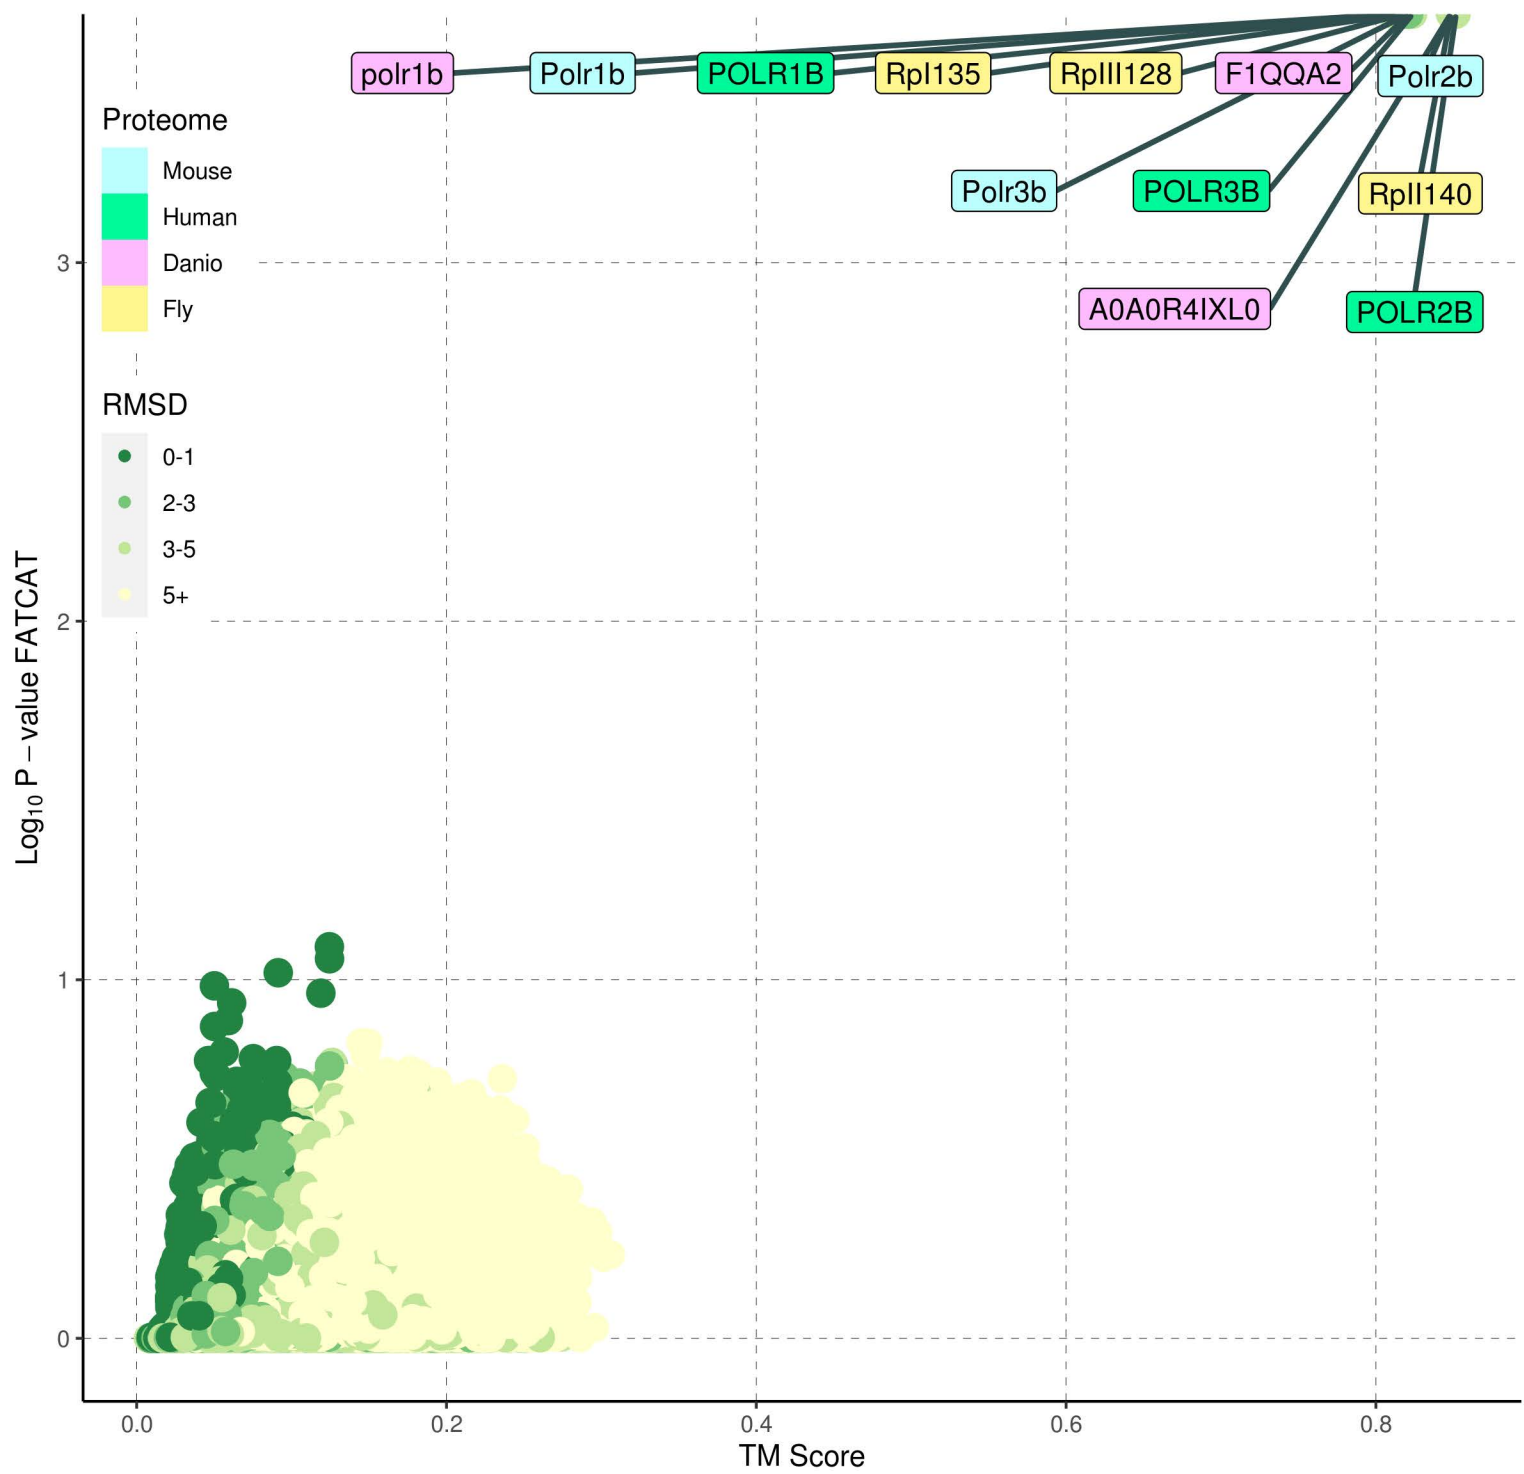

A26 : No hits, top-scoring values are indicated

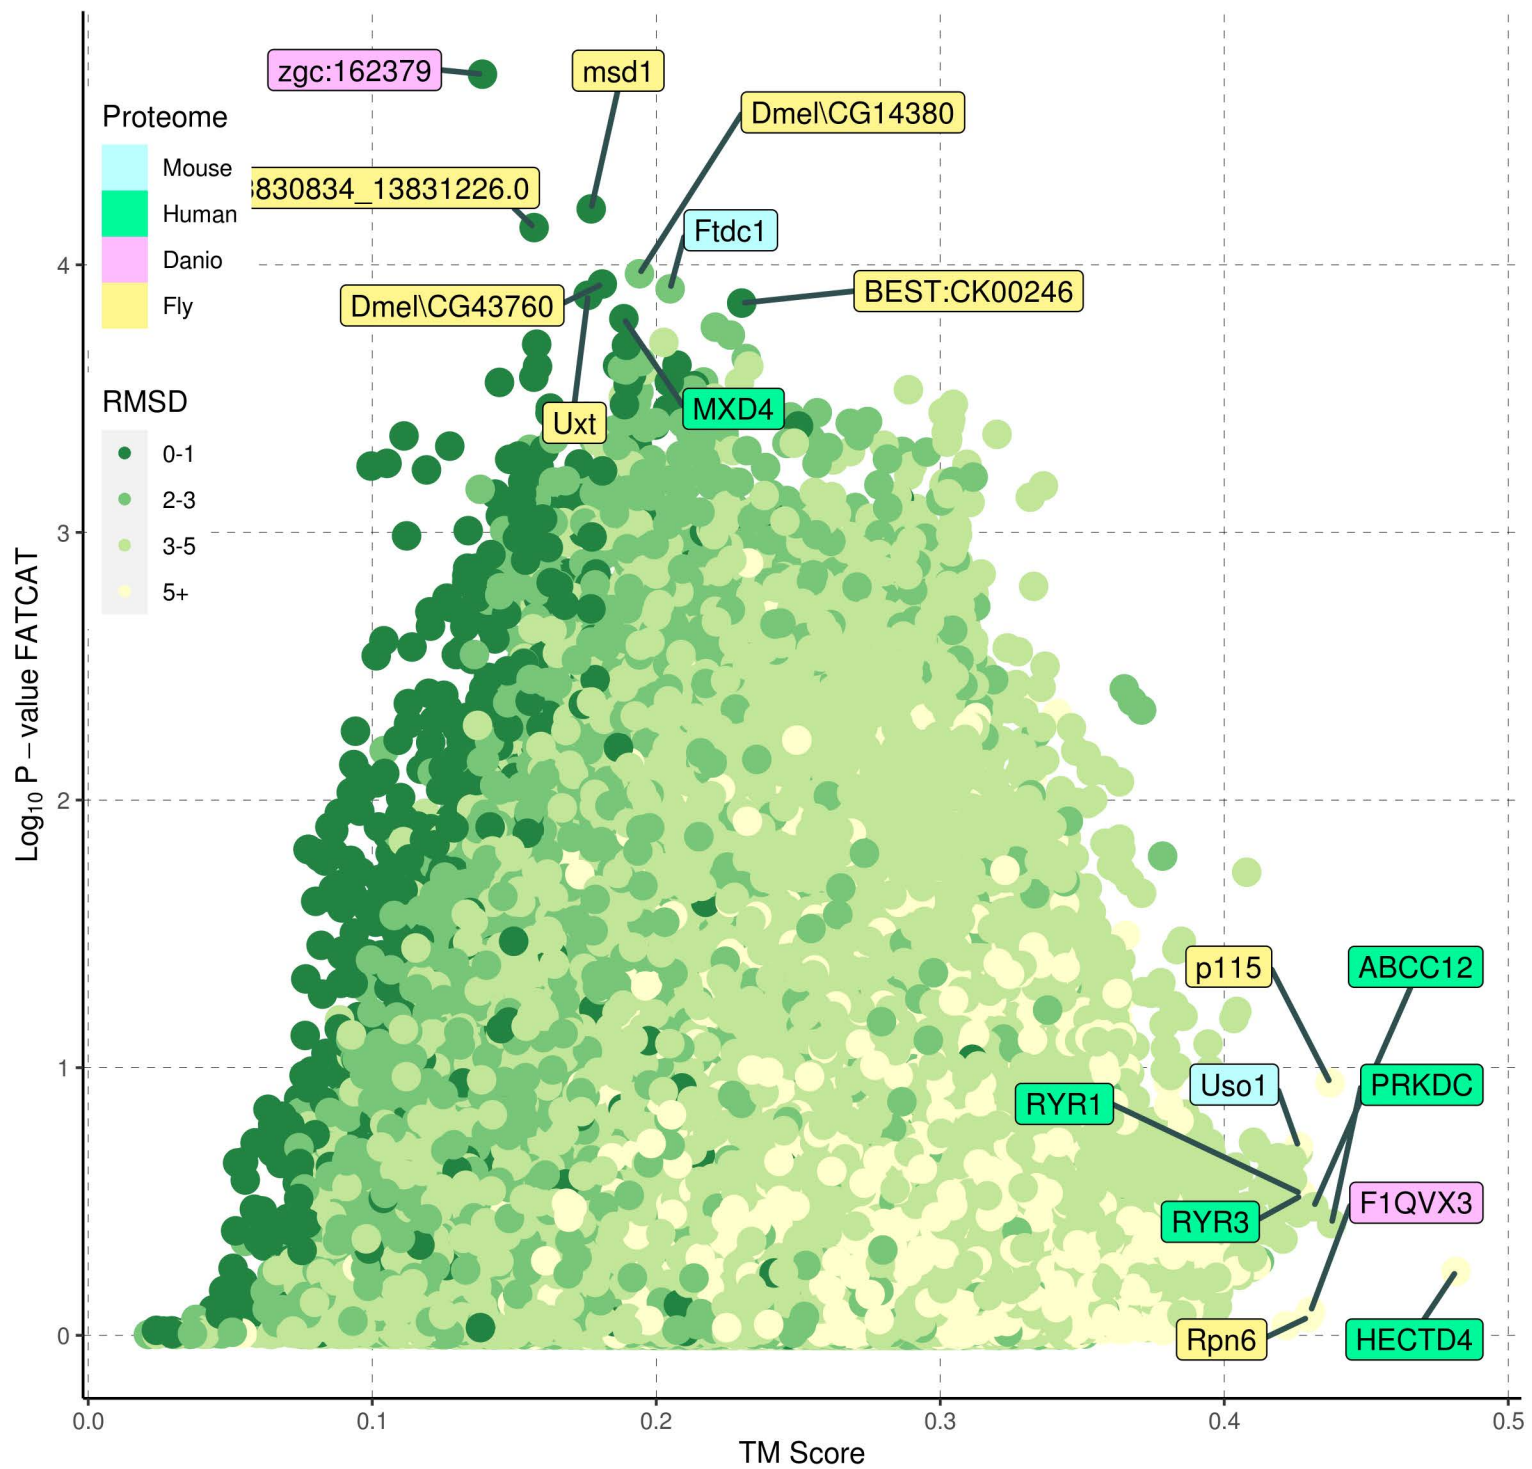



## A27

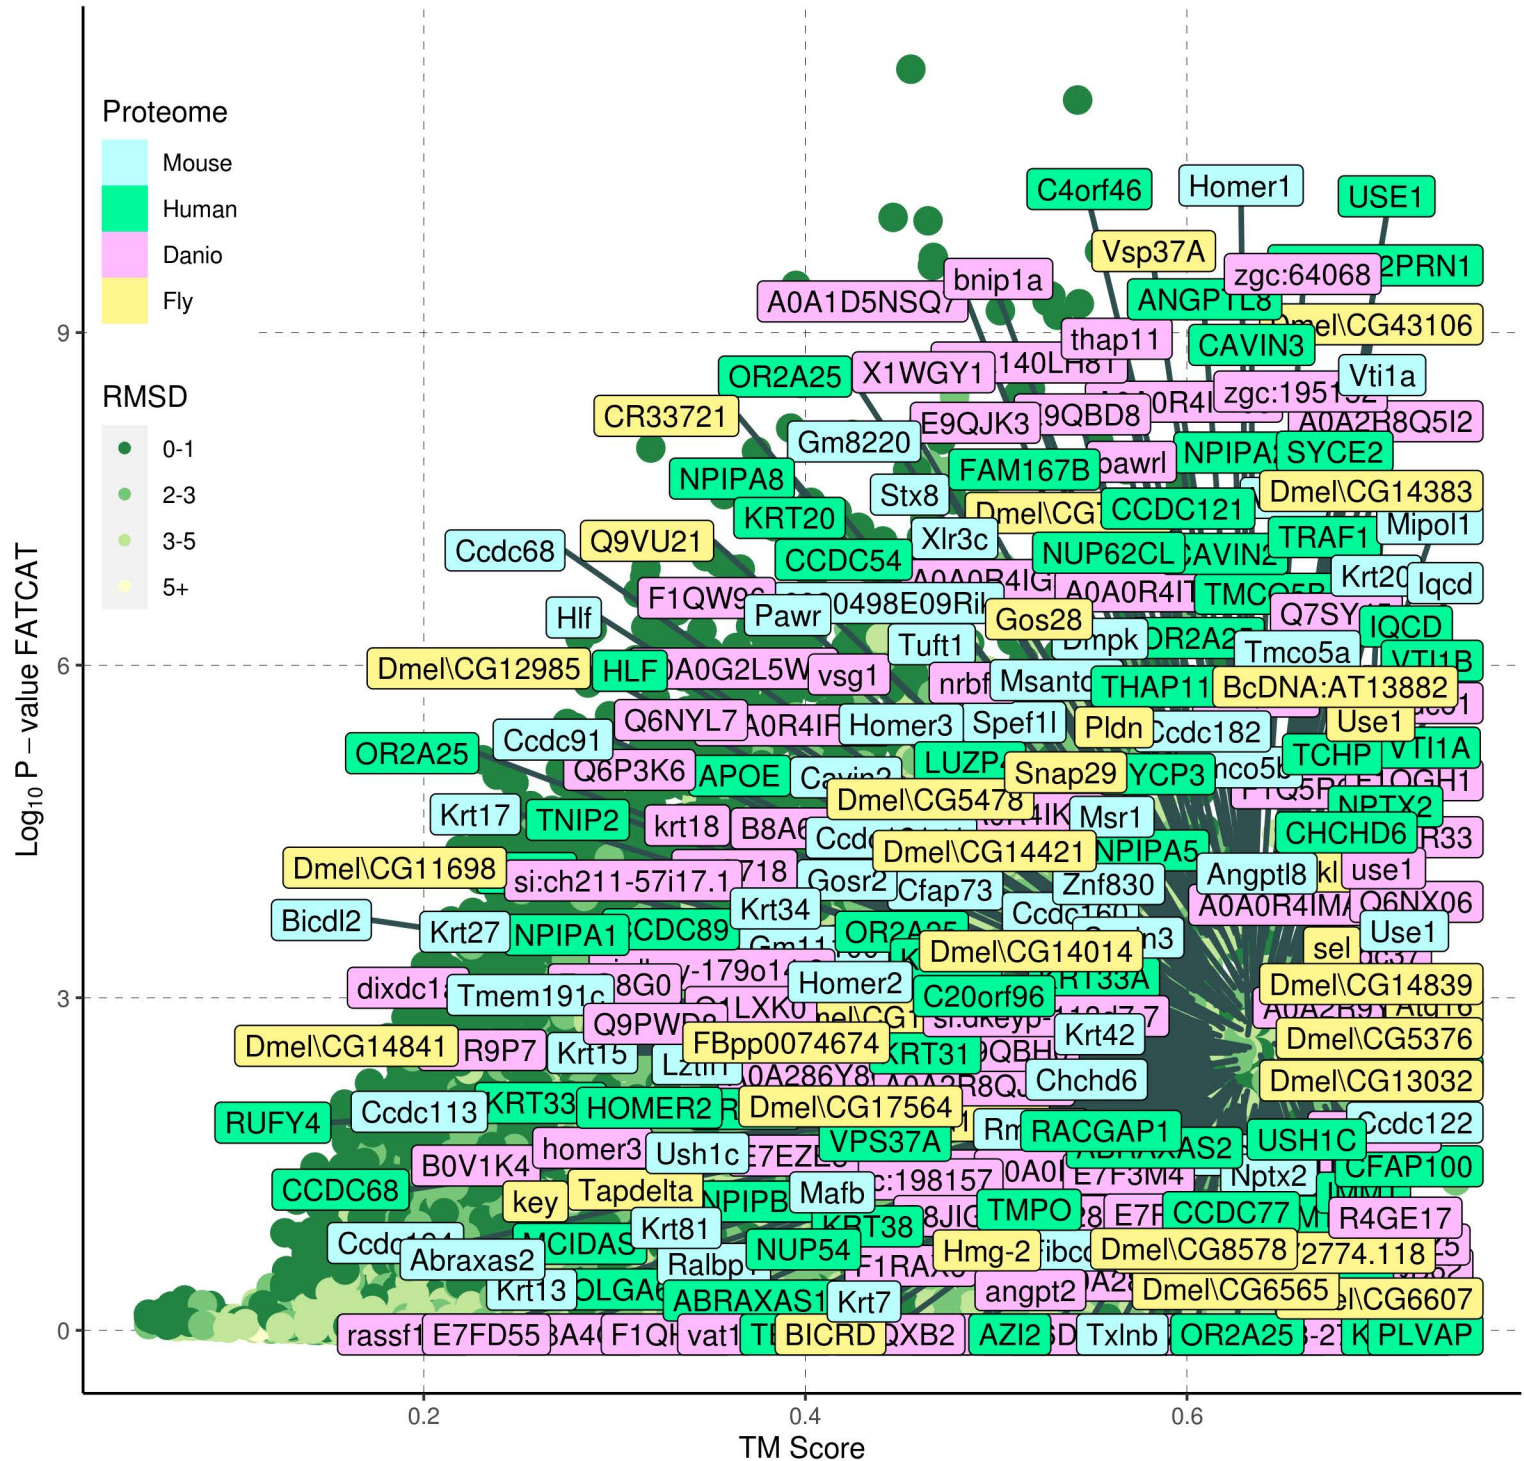

A28 : No hits, top-scoring values are indicated

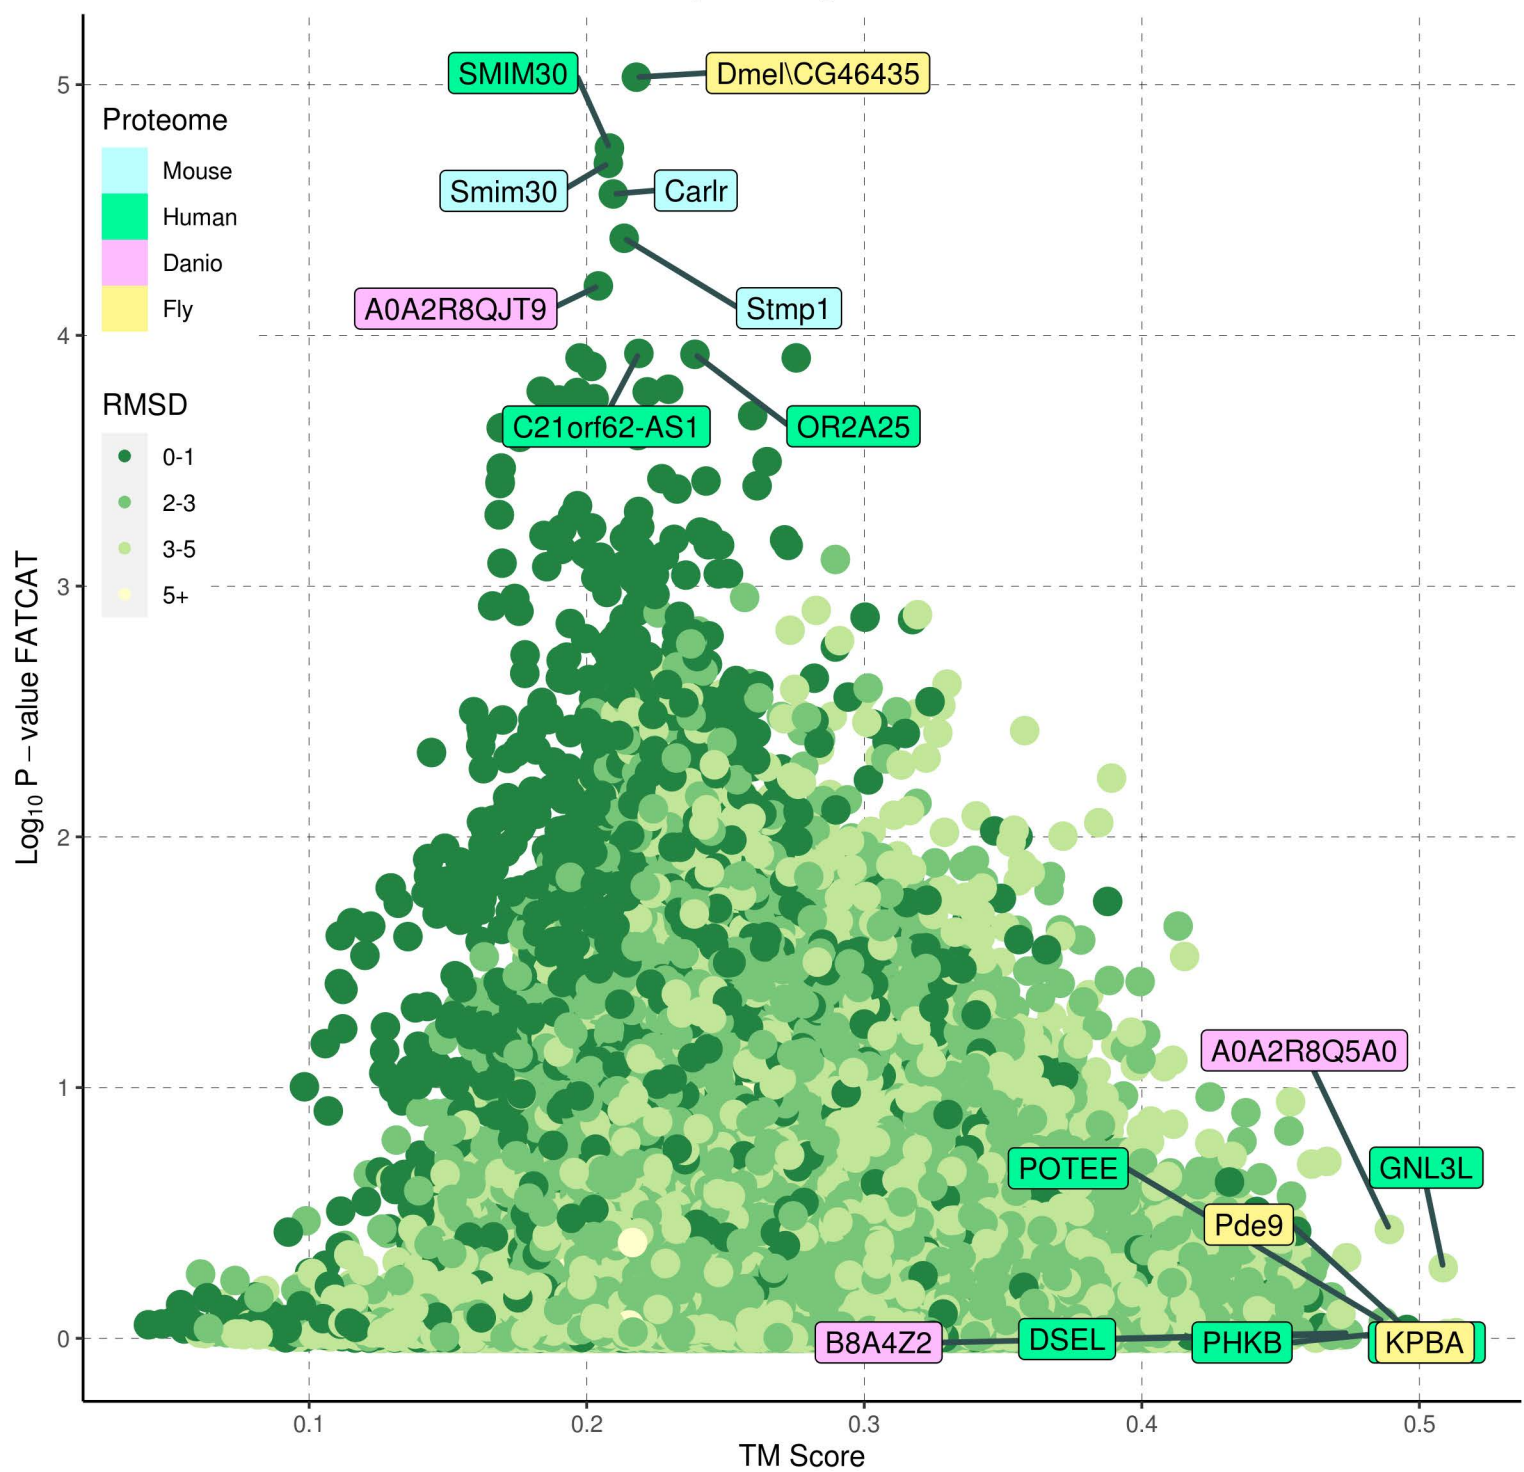

# A29 : No hits, top-scoring values are indicated

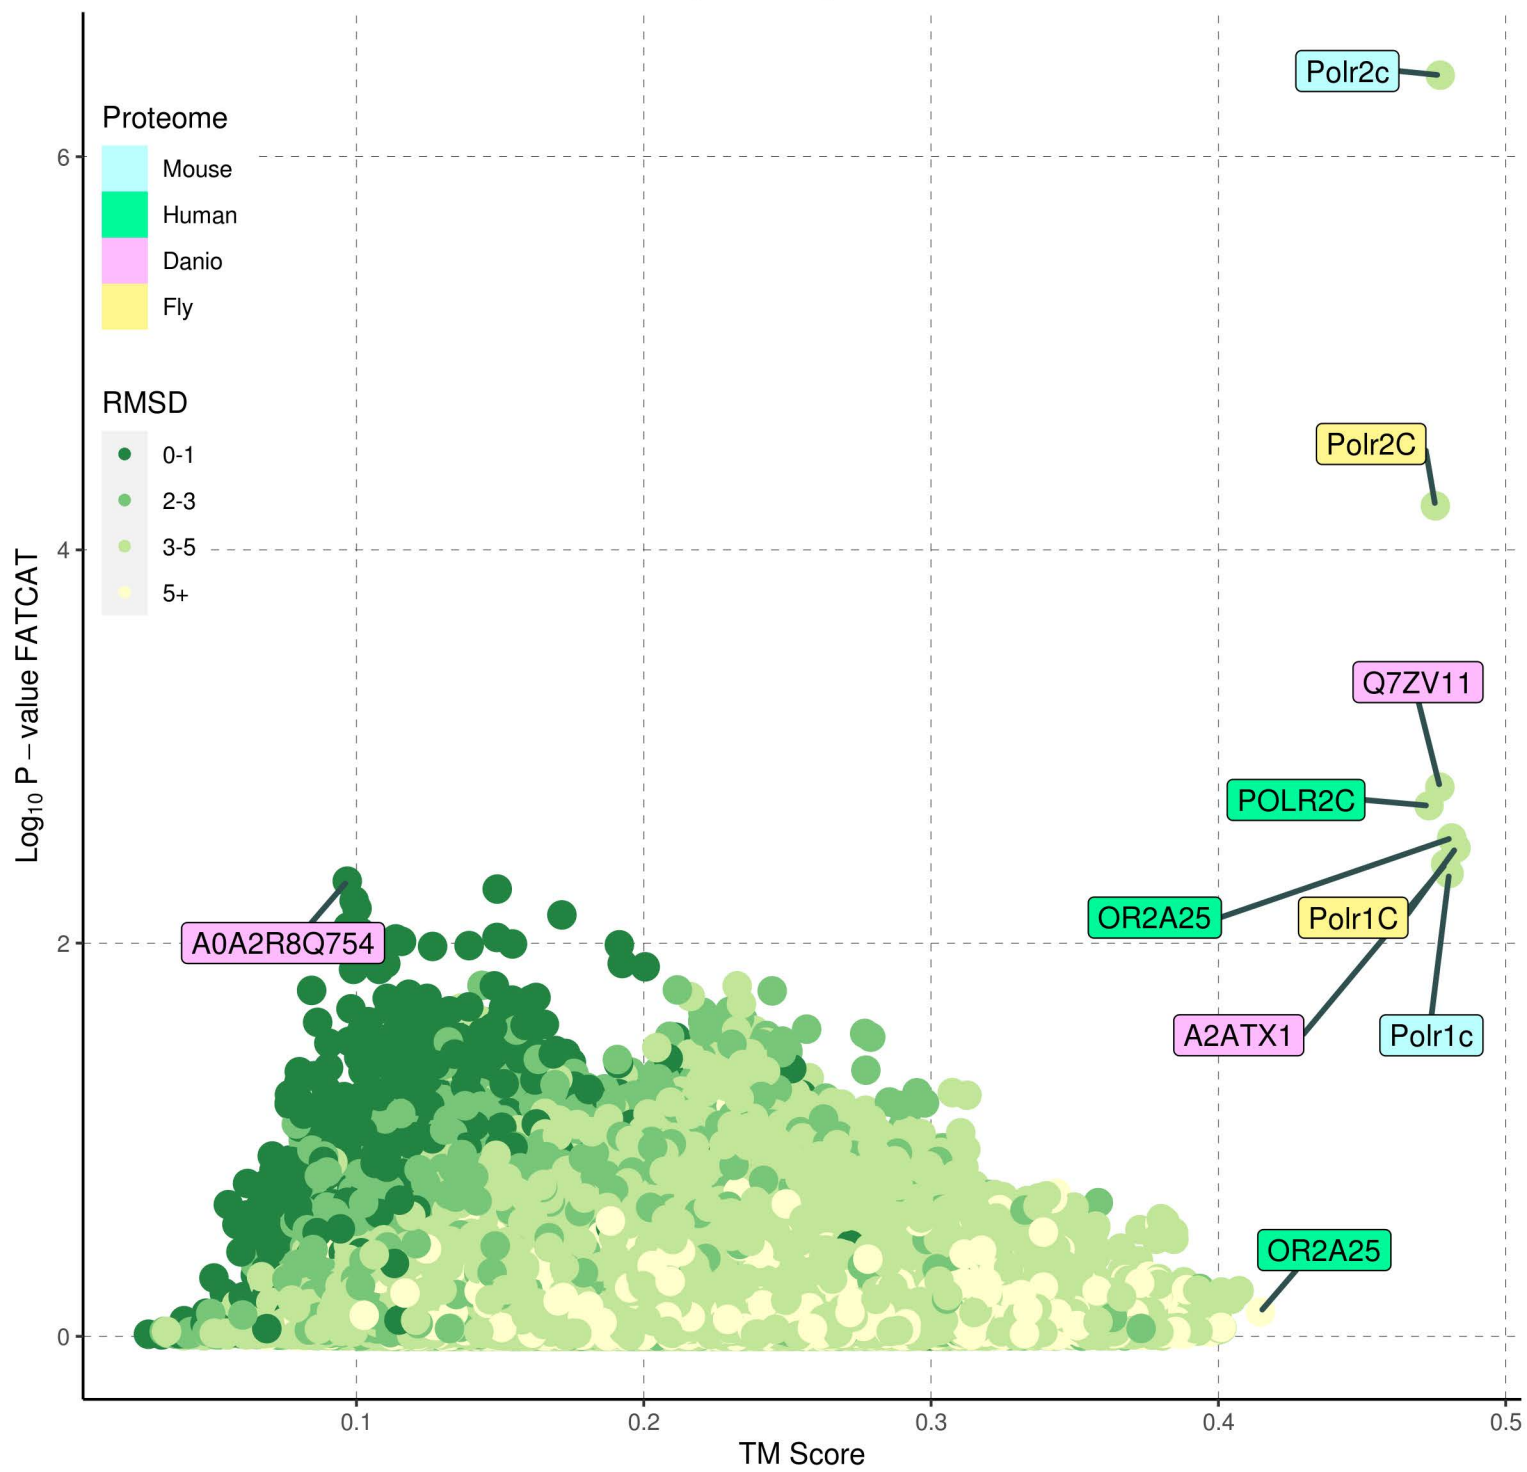

# A30

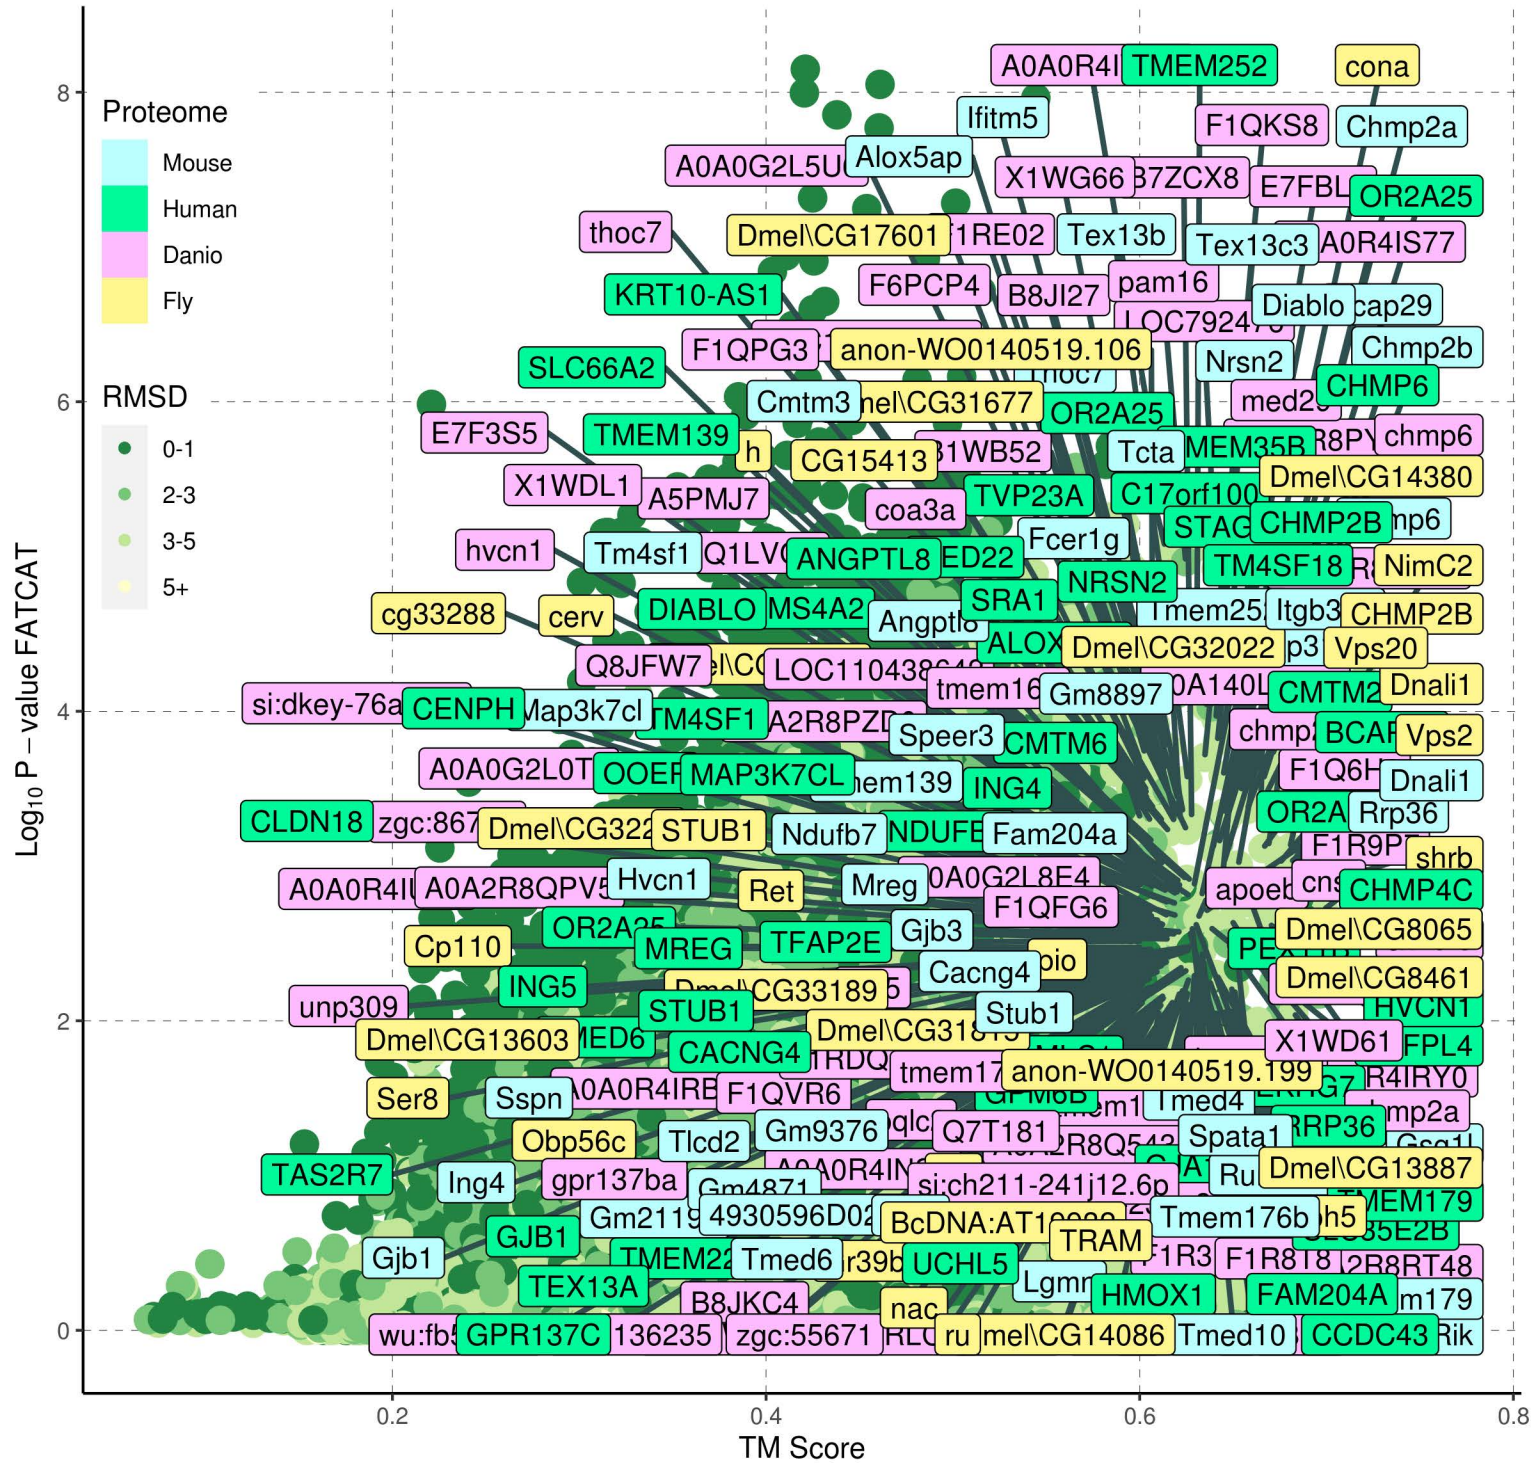

# A31 : No hits, top-scoring values are indicated

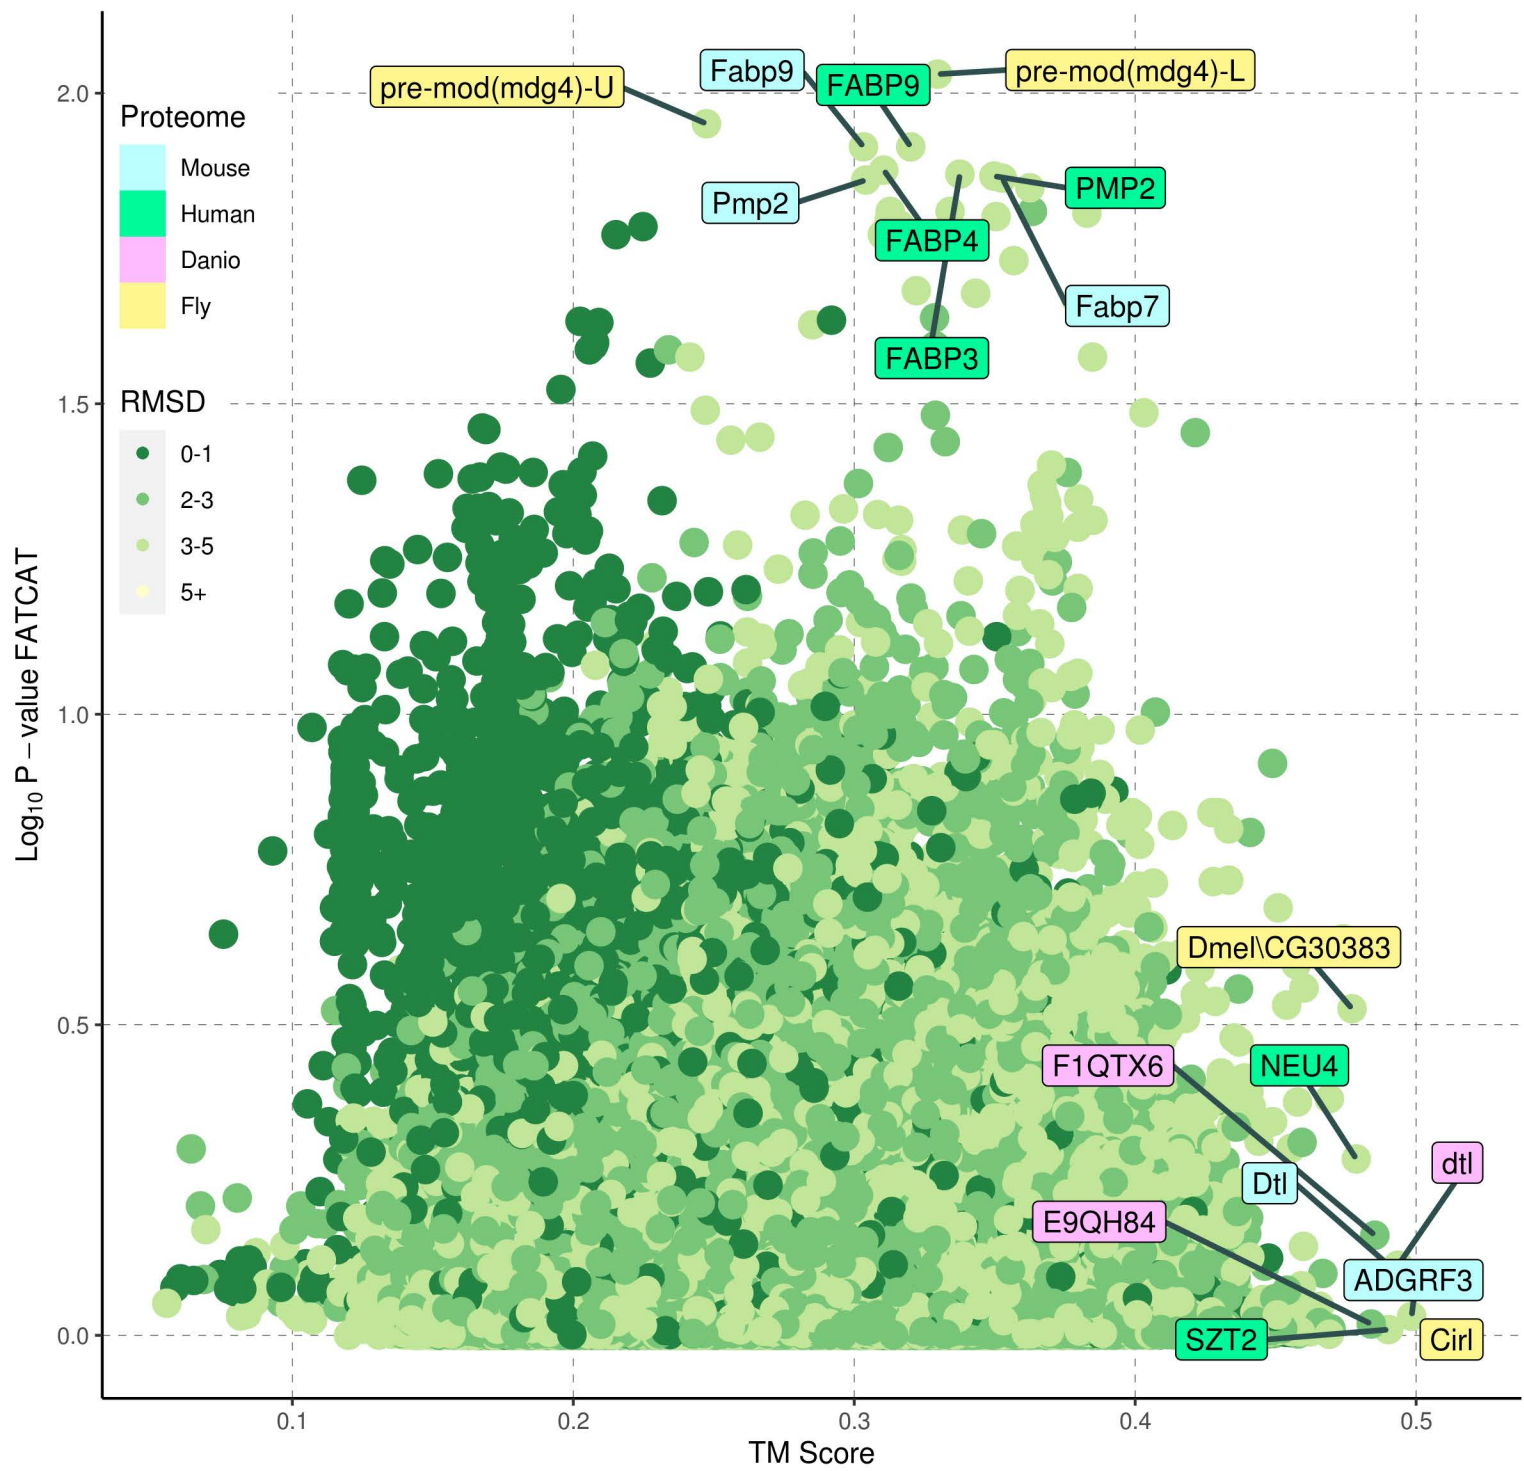

A32 : No hits, top-scoring values are indicated

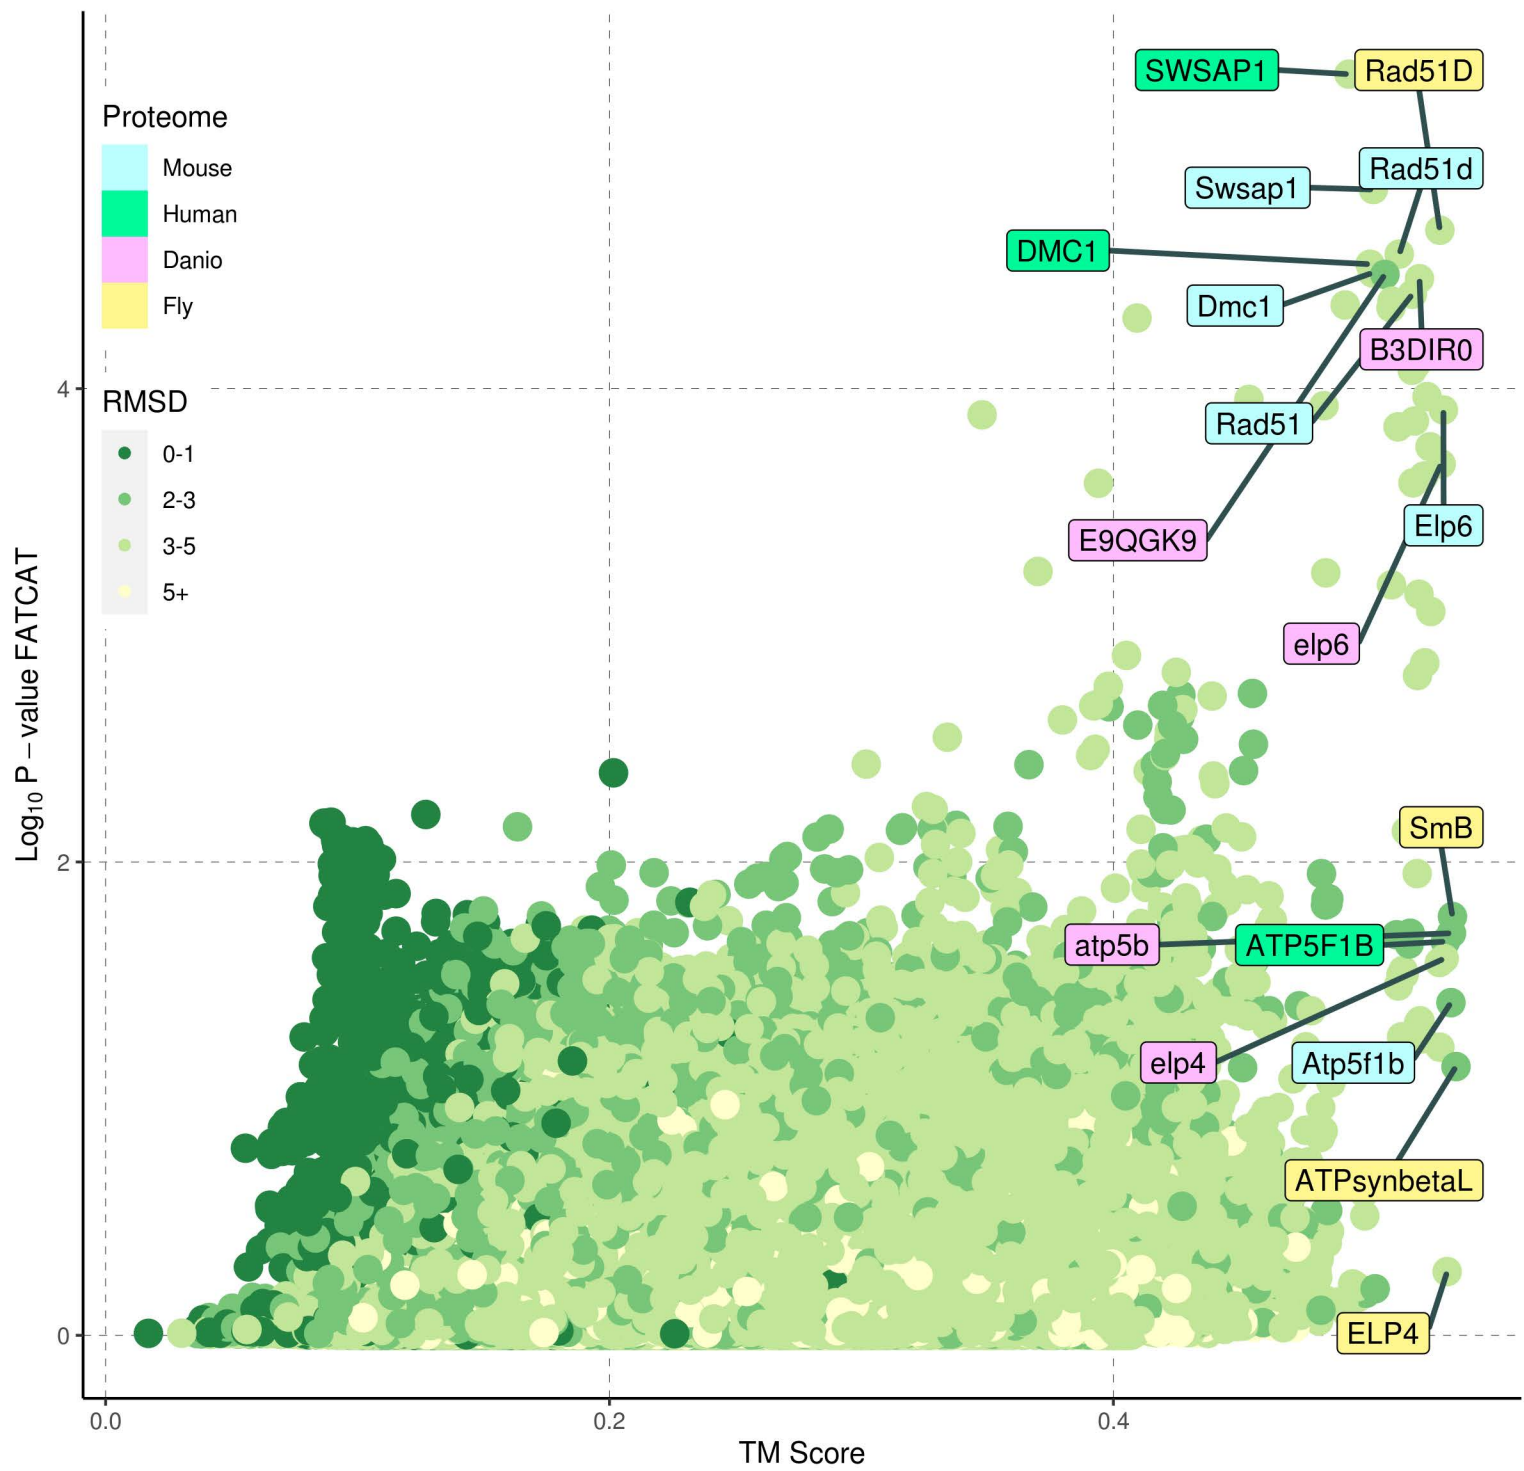

A33

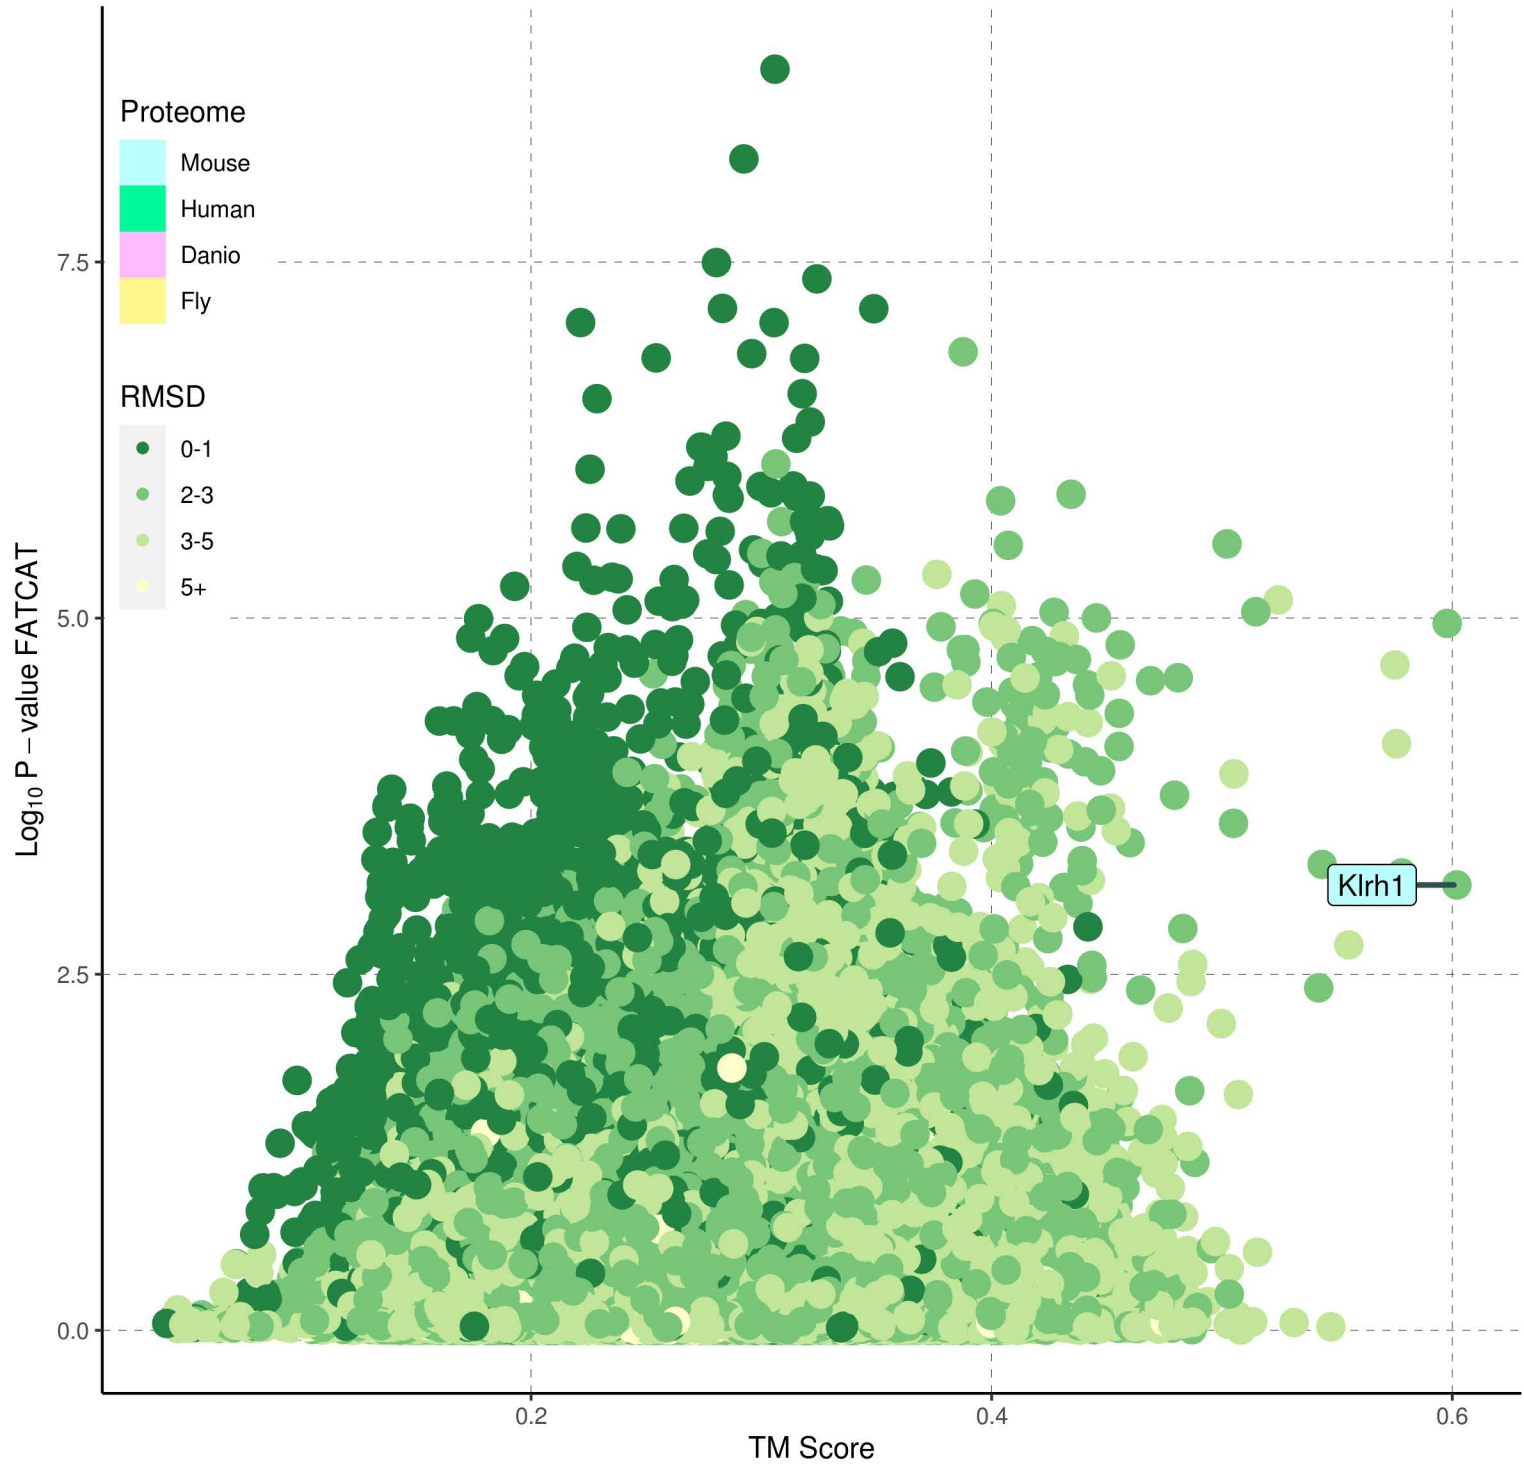

# A34

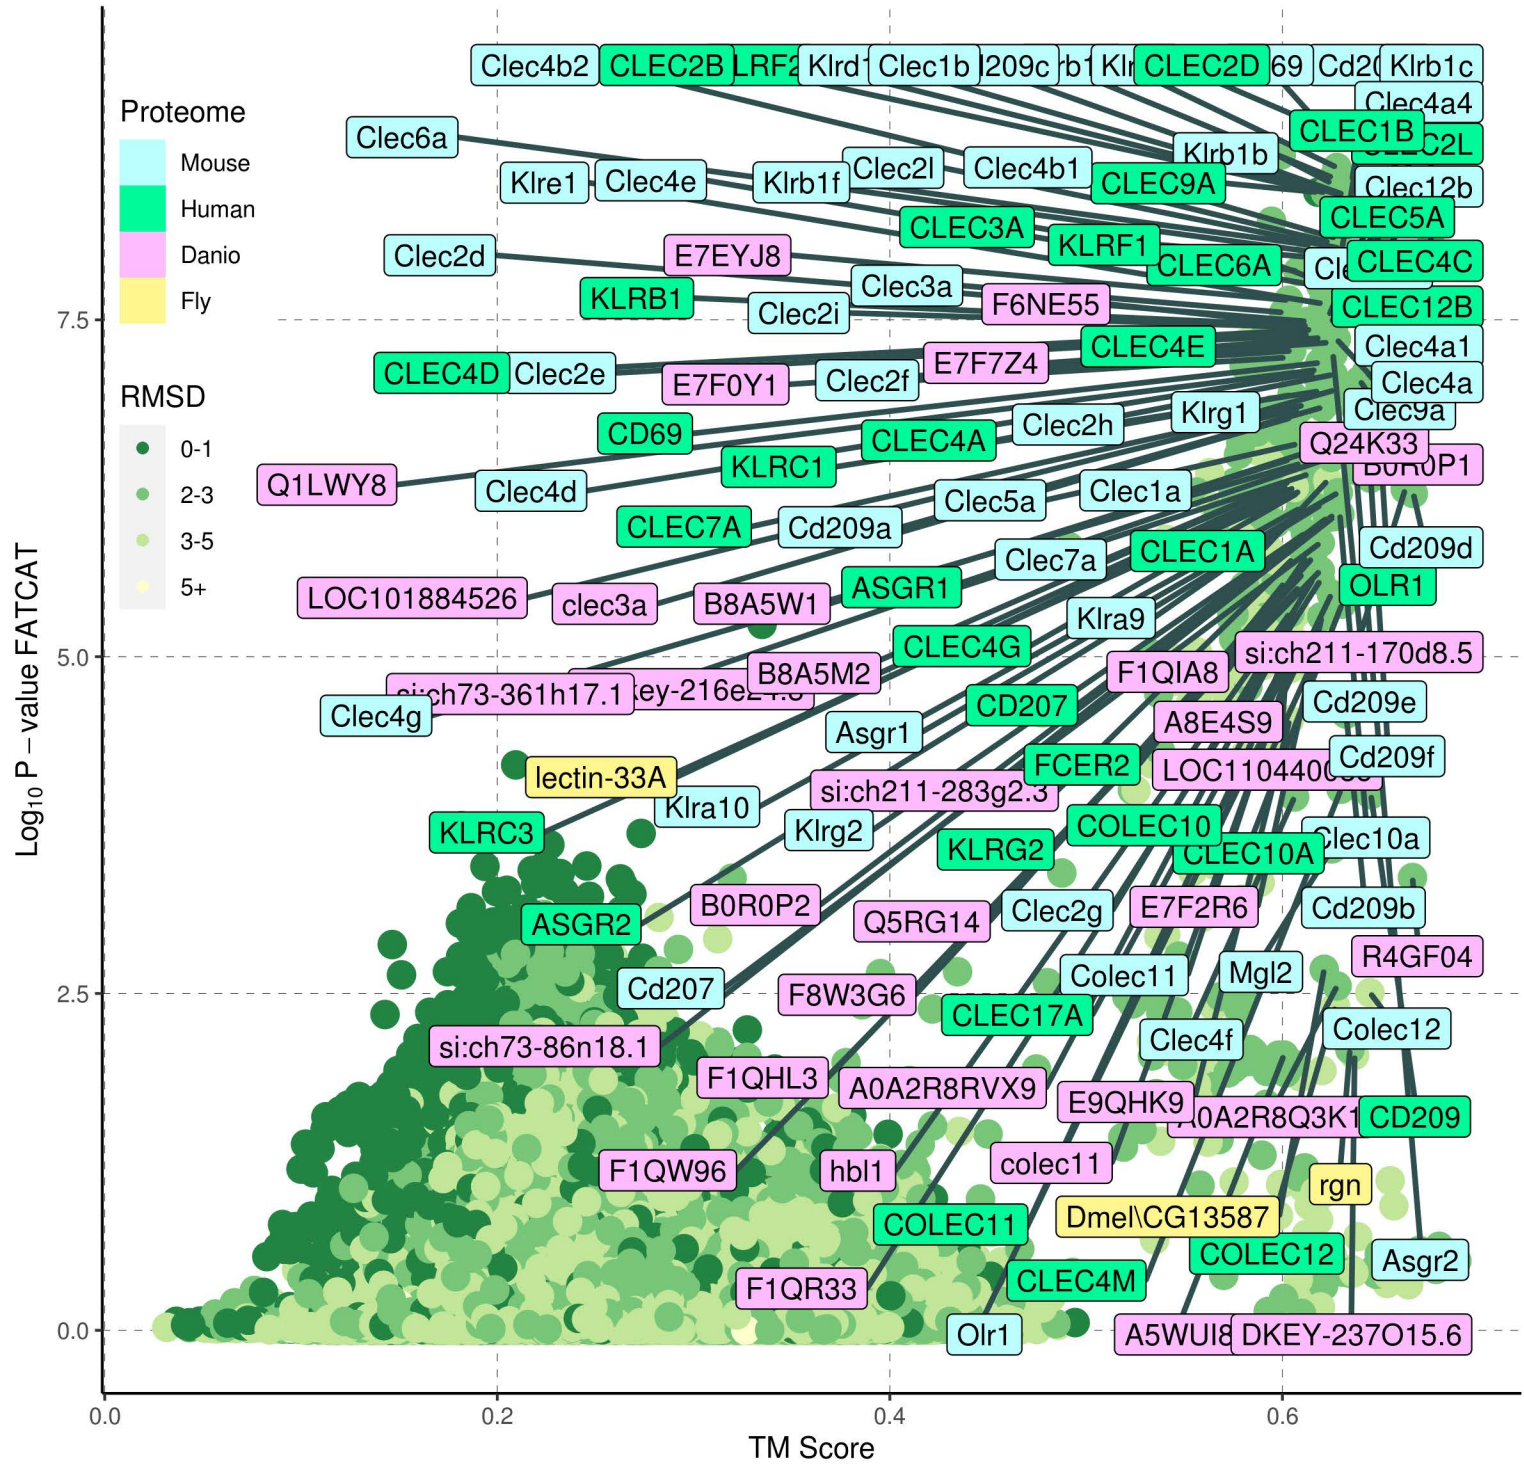



A35 : No hits, top-scoring values are indicated

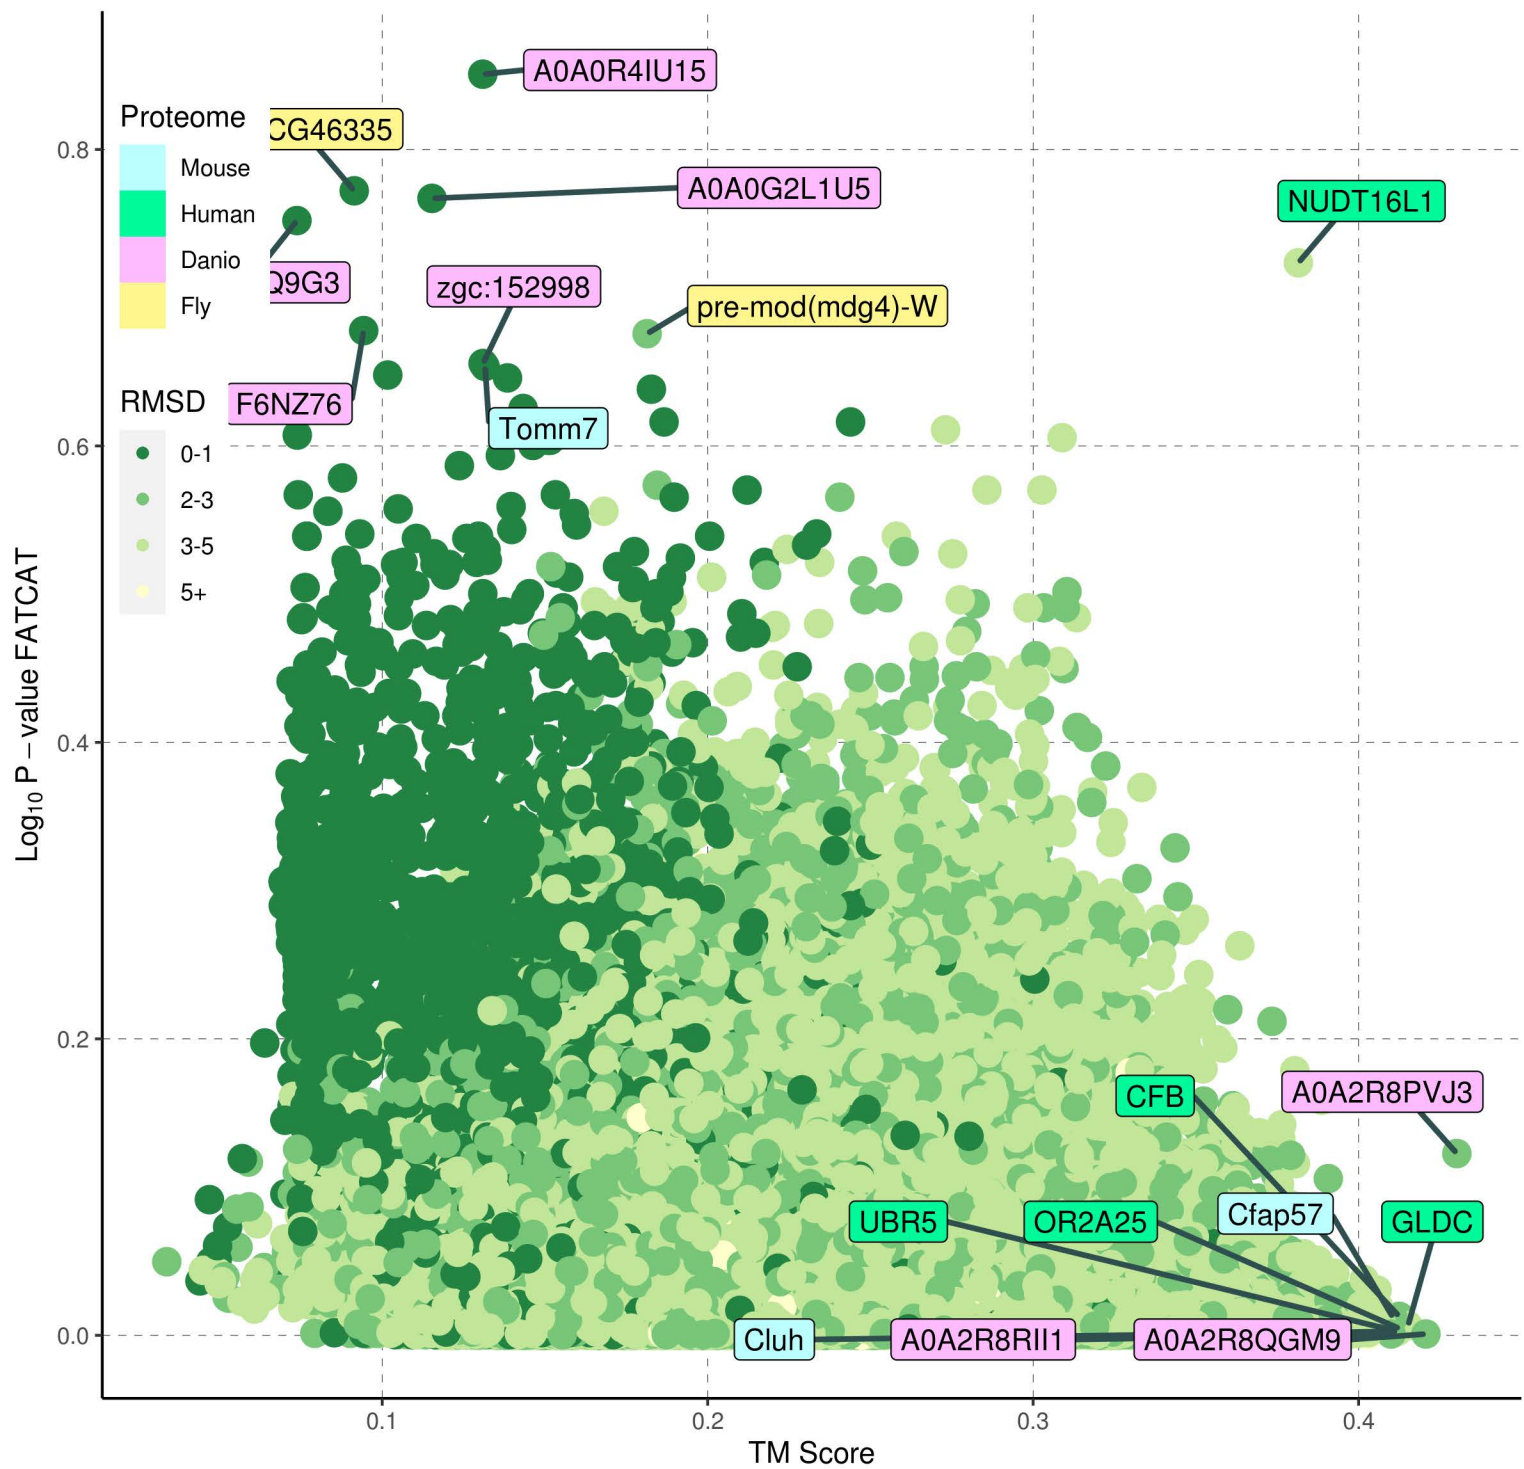

# A36 : No hits, top-scoring values are indicated

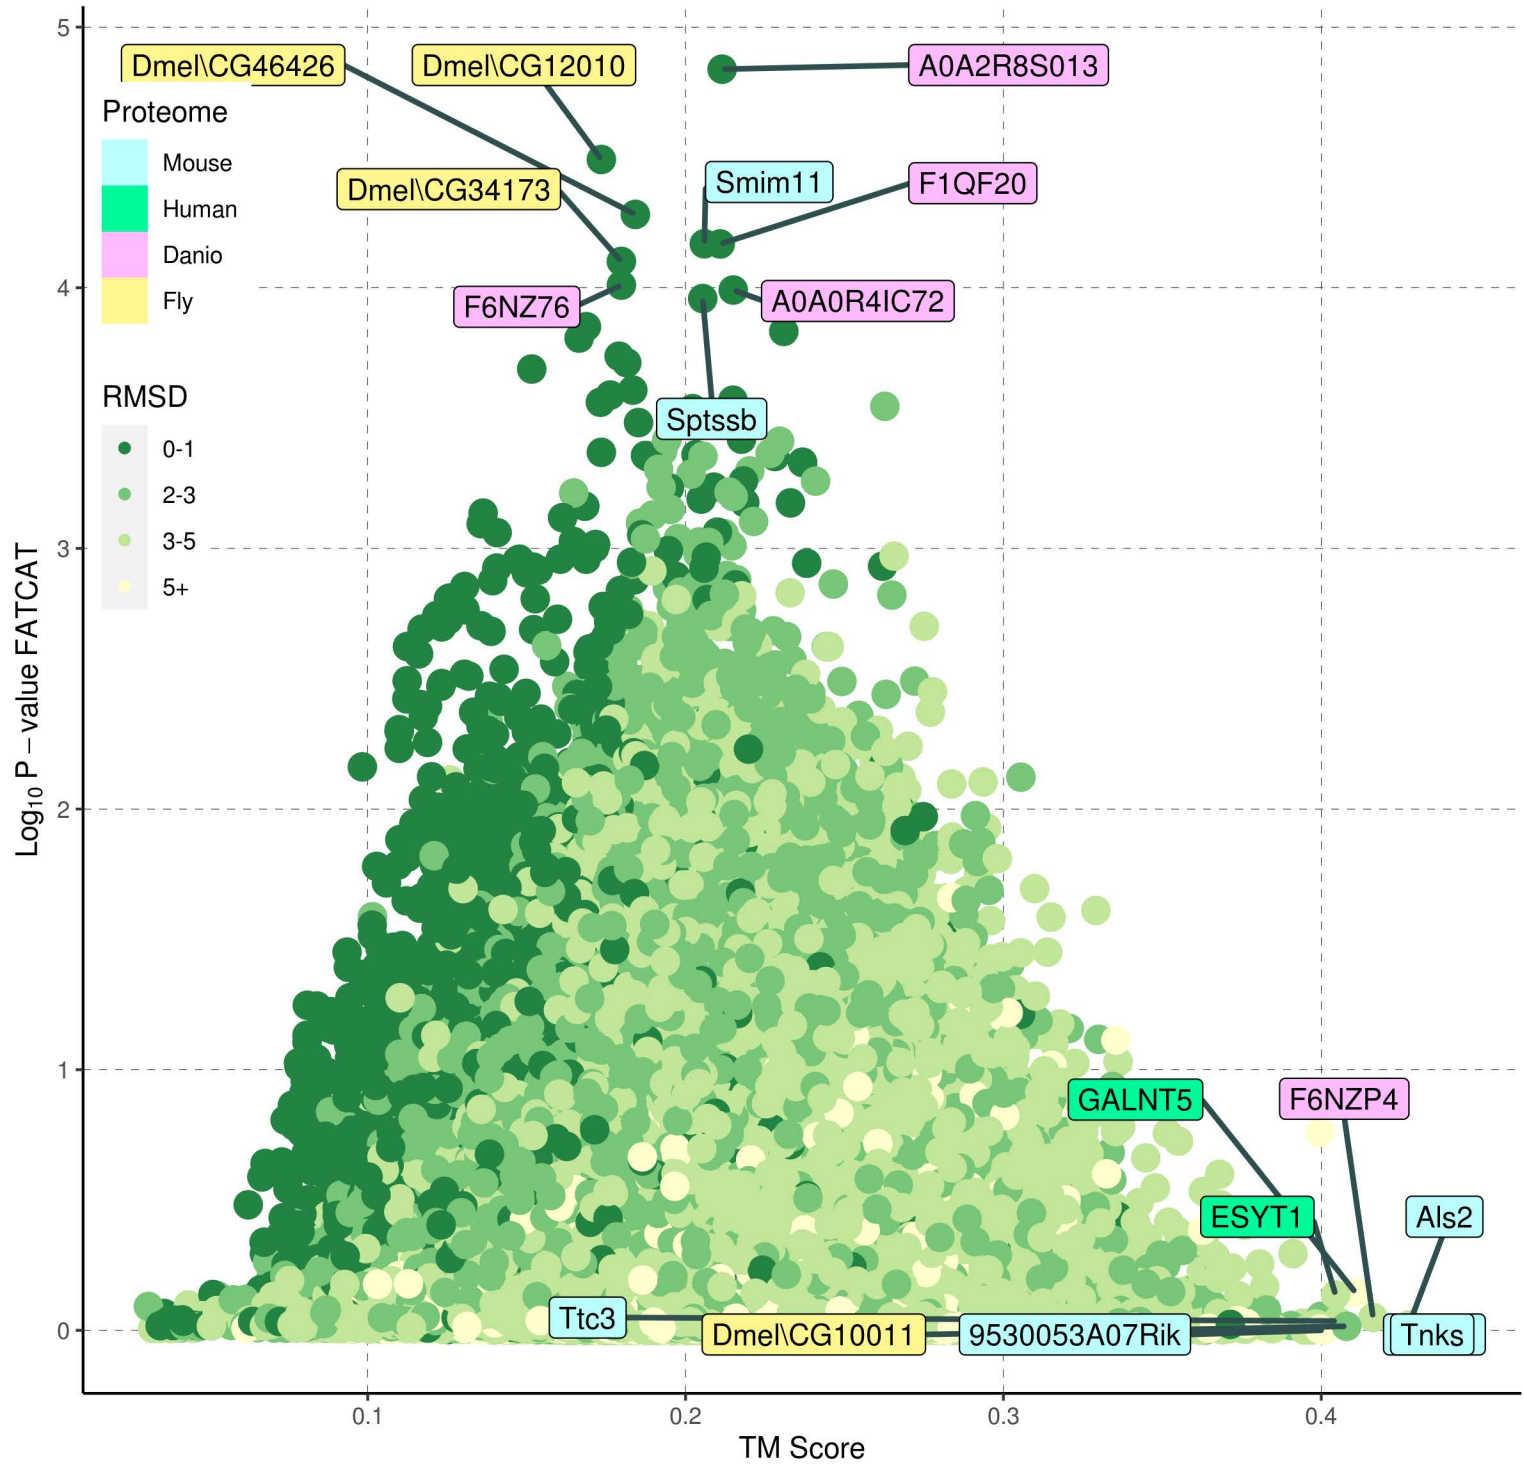

# A37 : No hits, top-scoring values are indicated

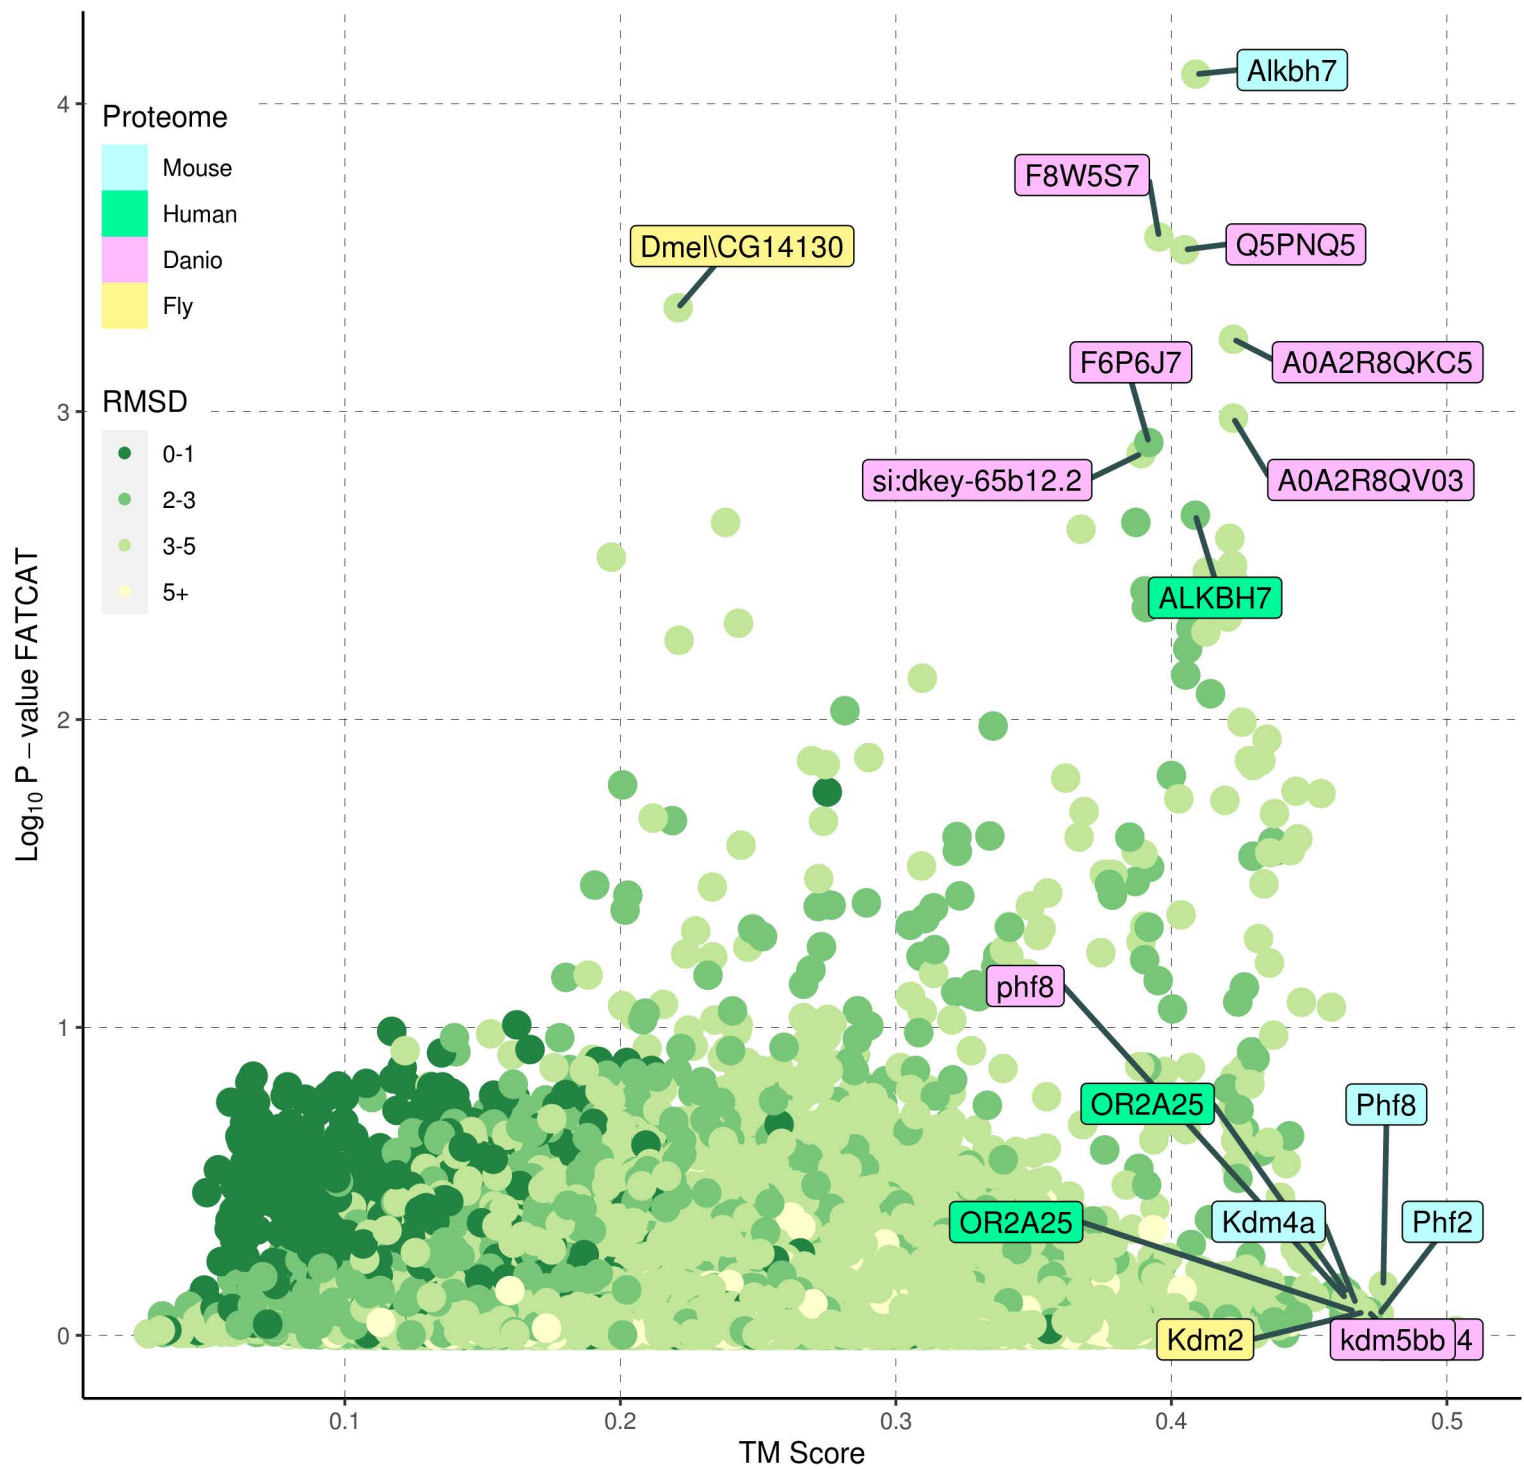

## A38

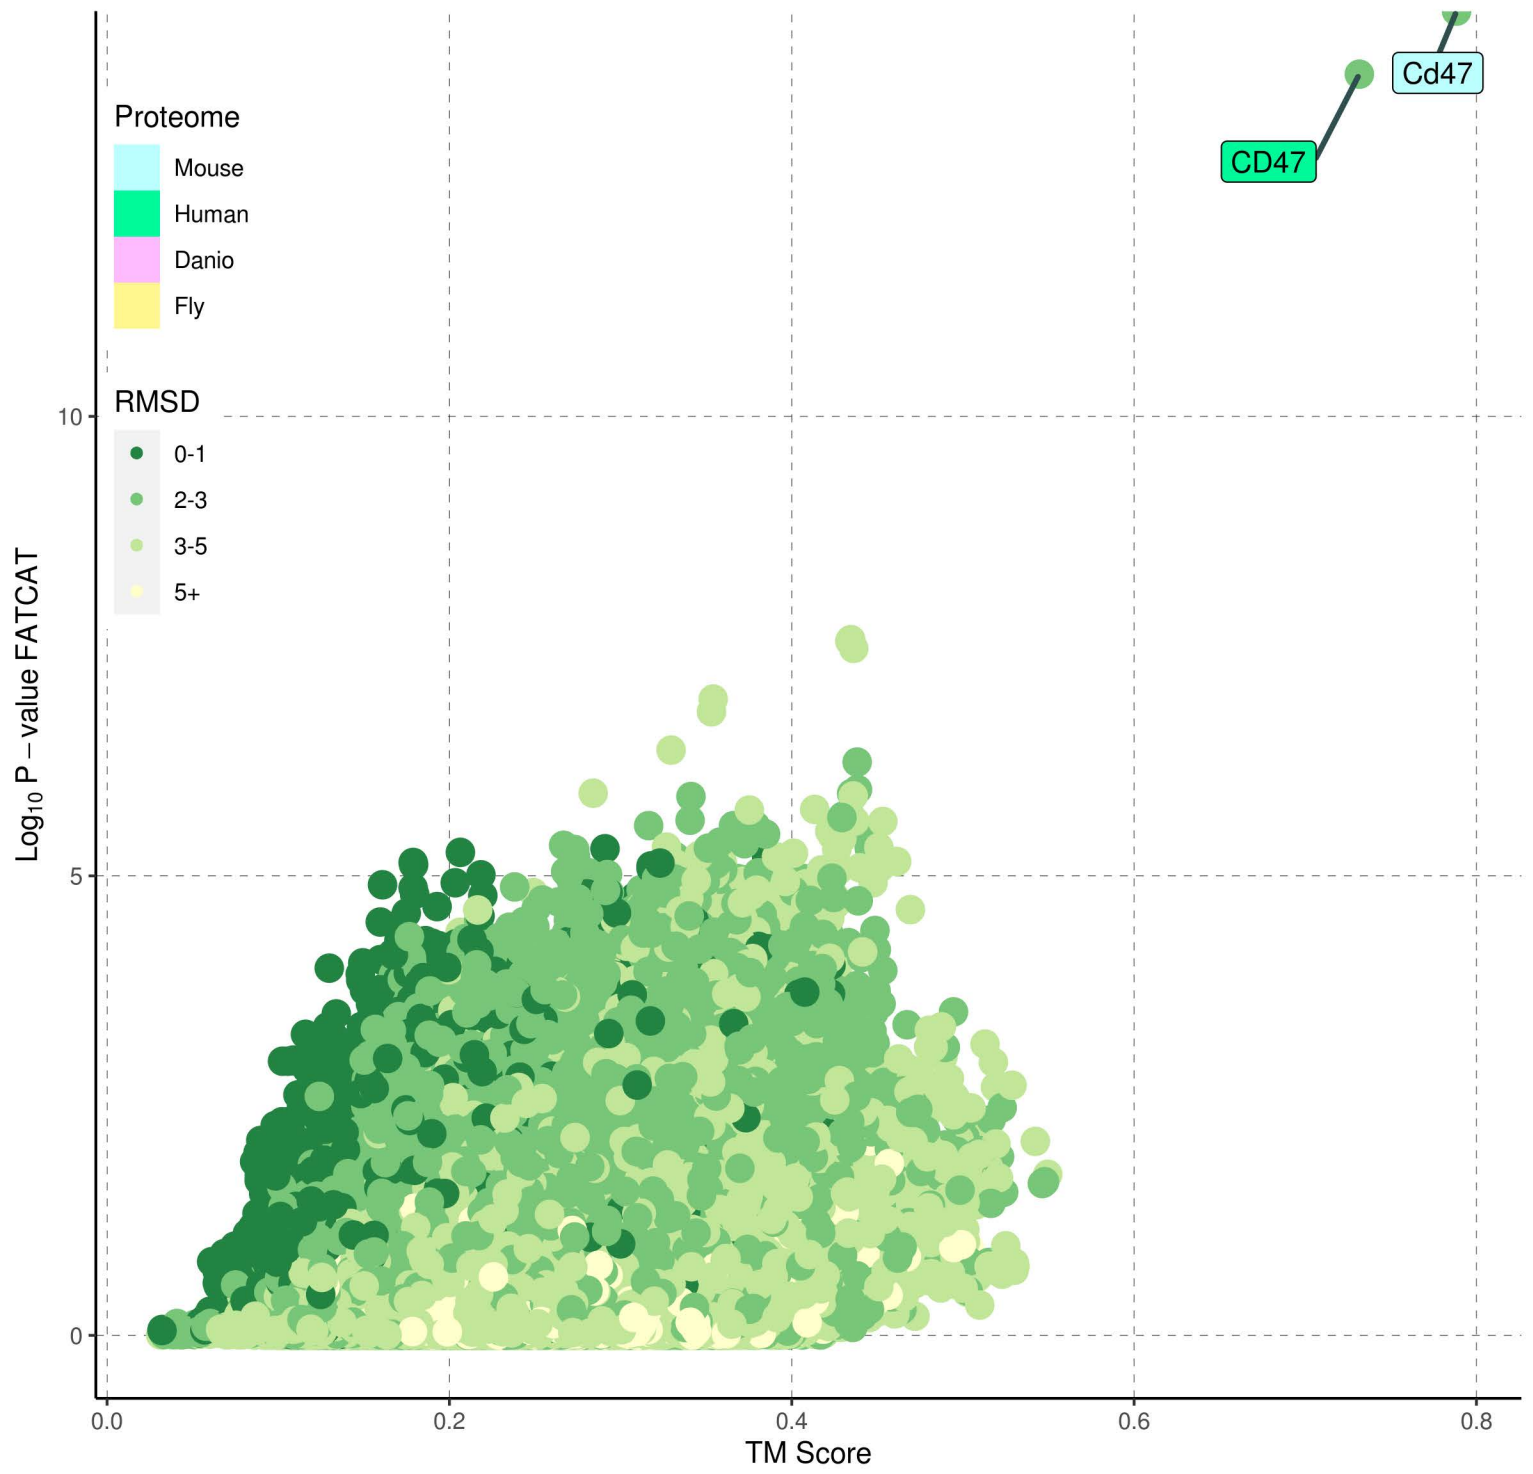



## A40

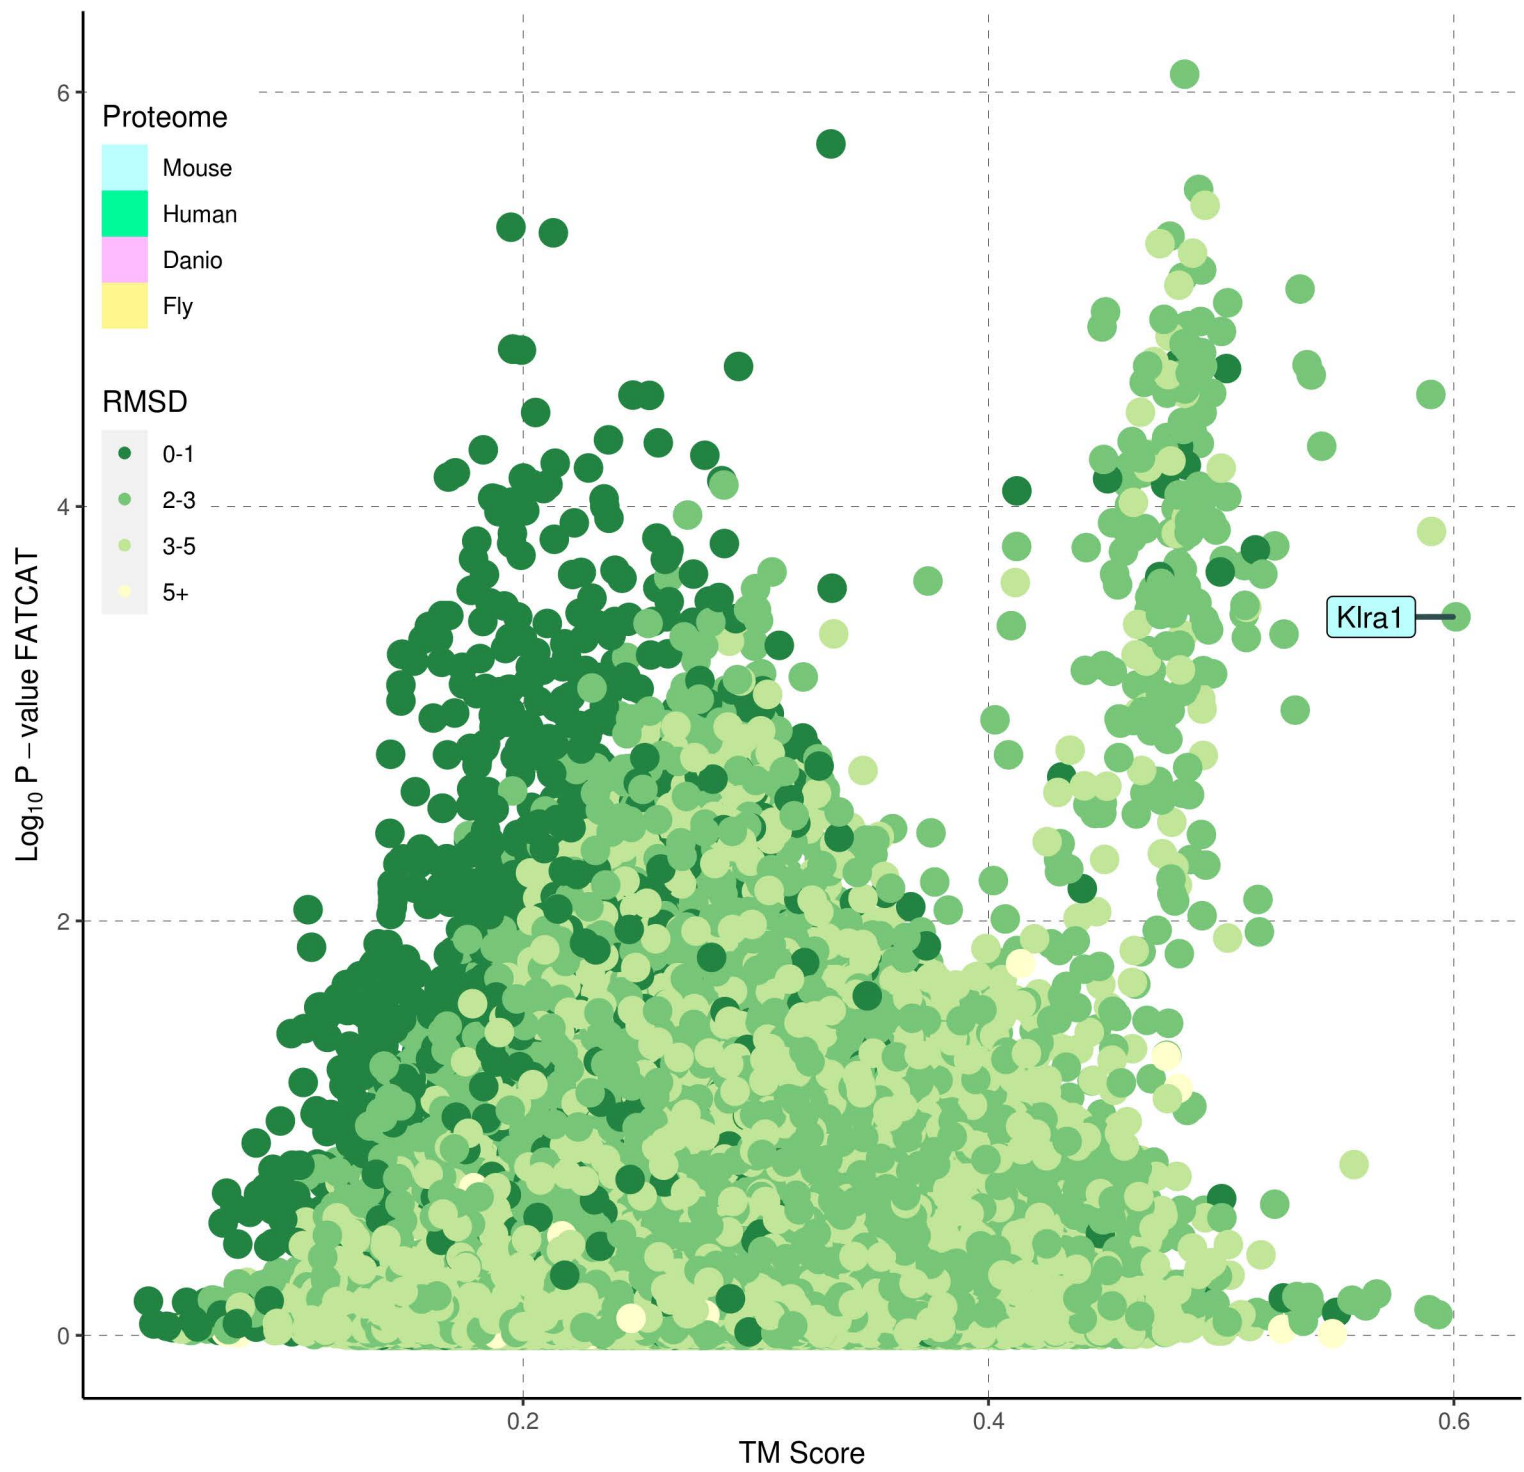

A41 : No hits, top-scoring values are indicated

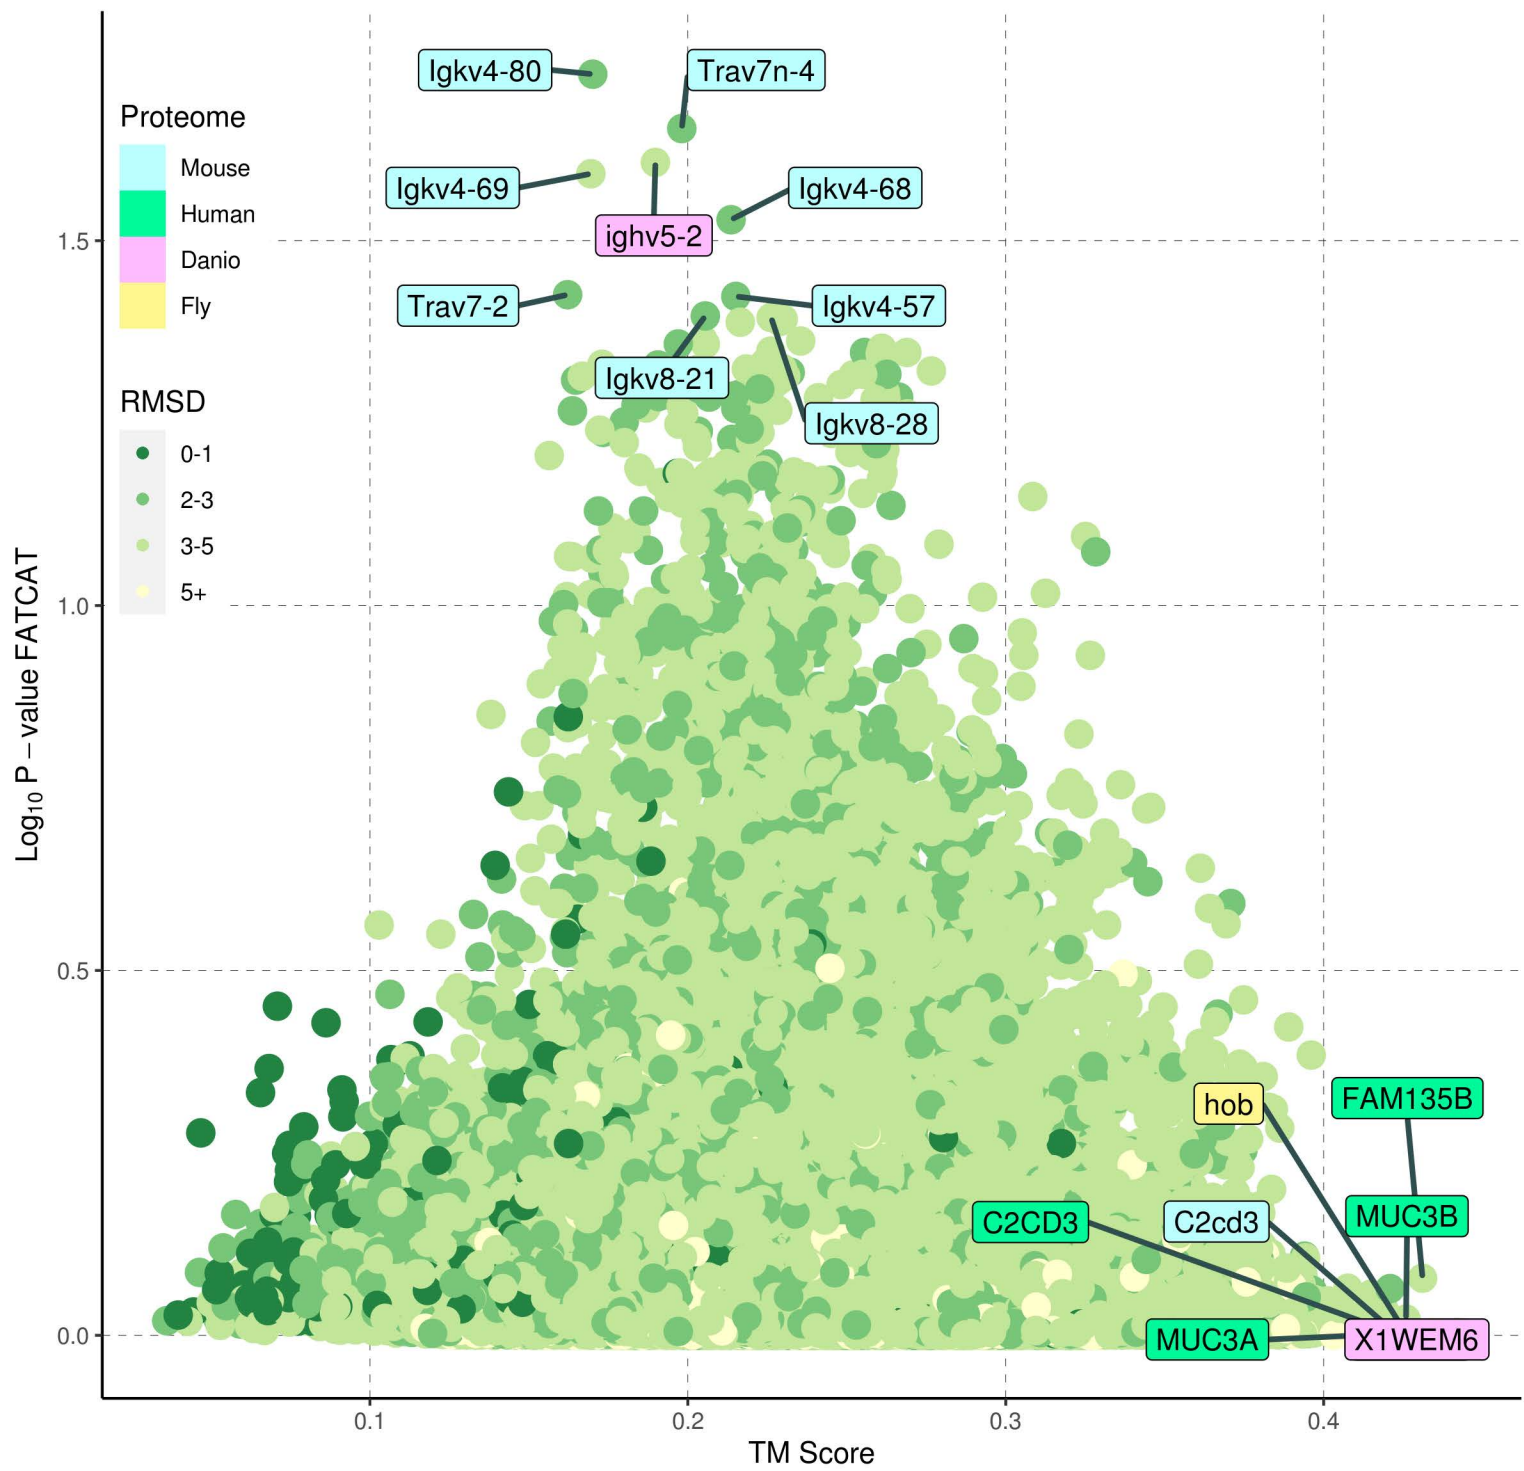

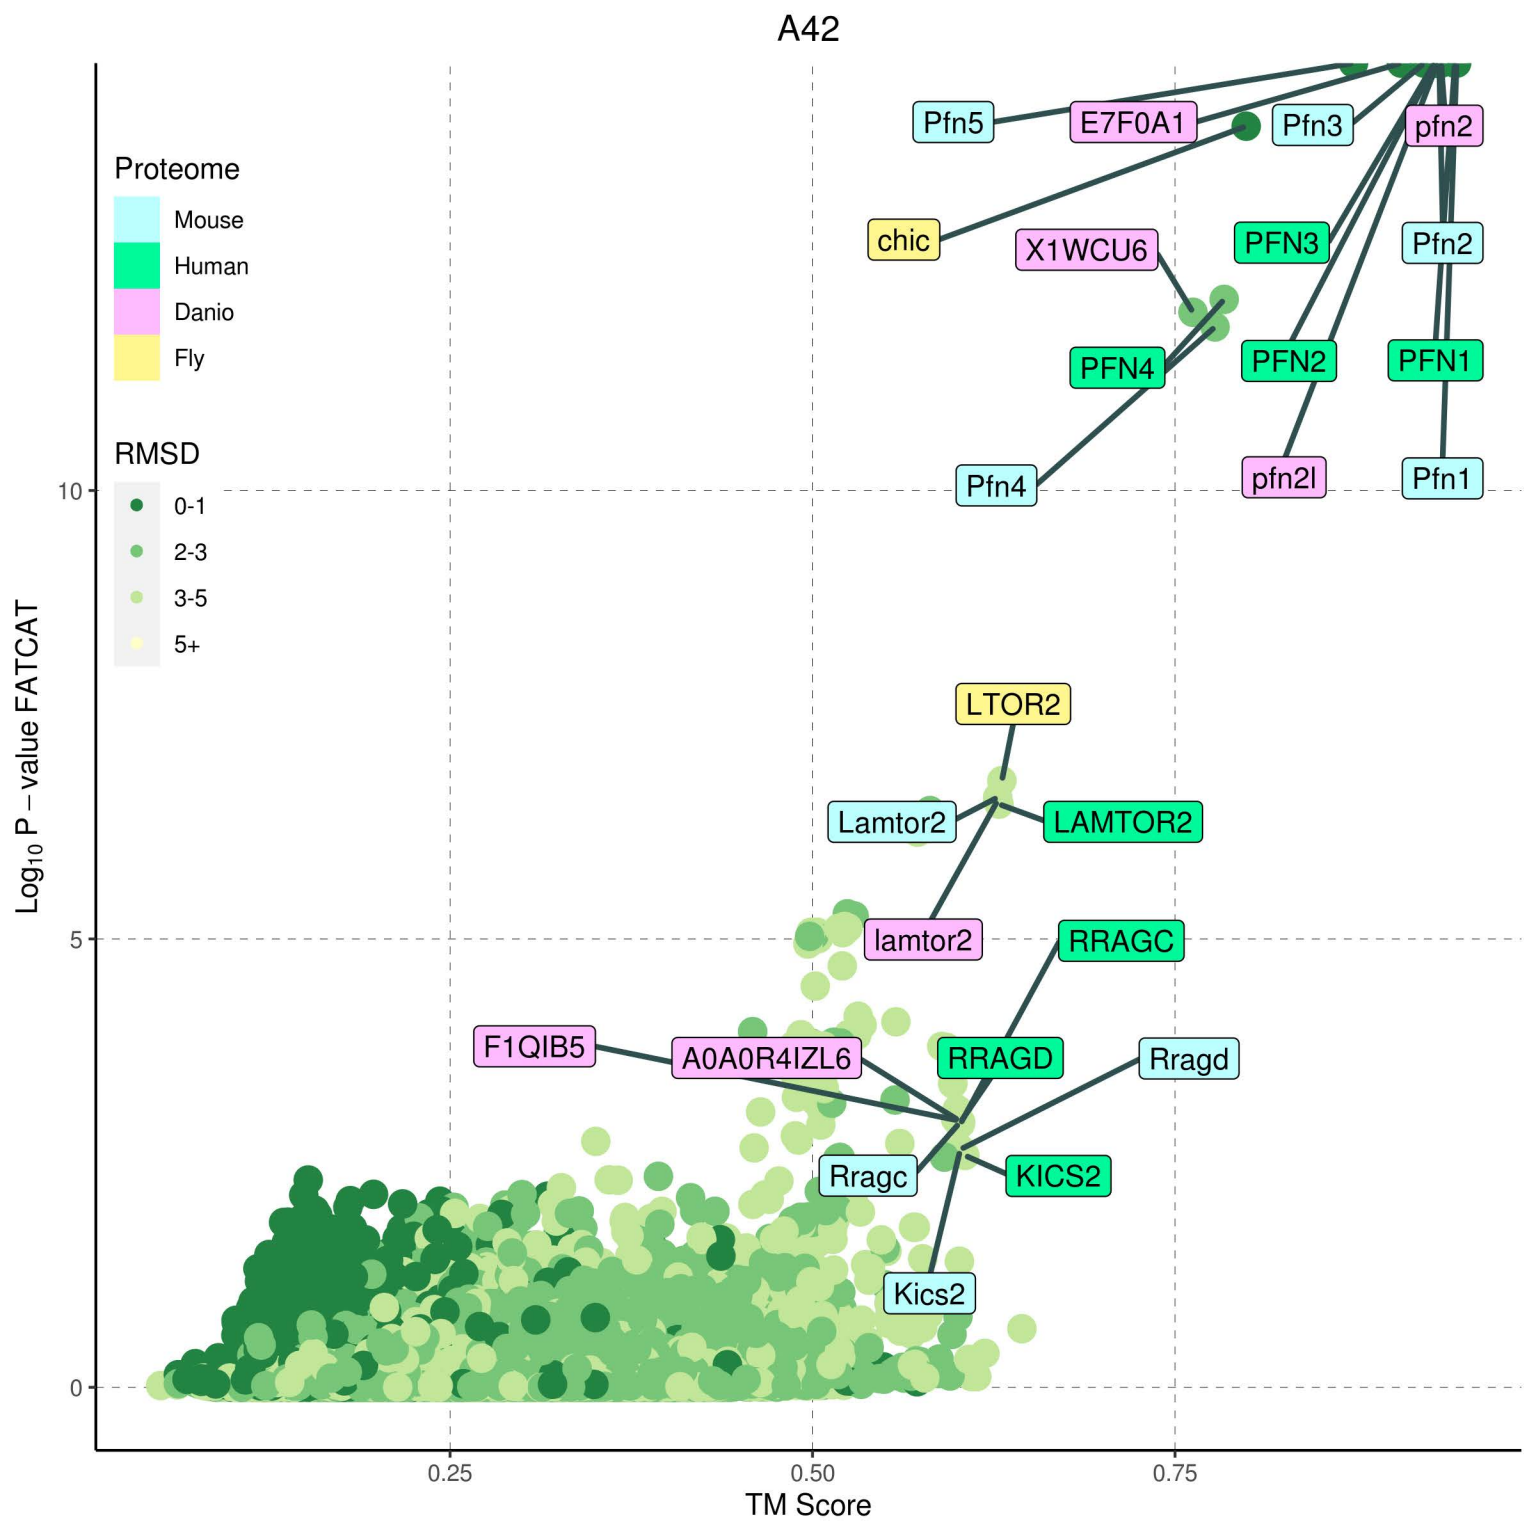



# A43 : No hits, top-scoring values are indicated

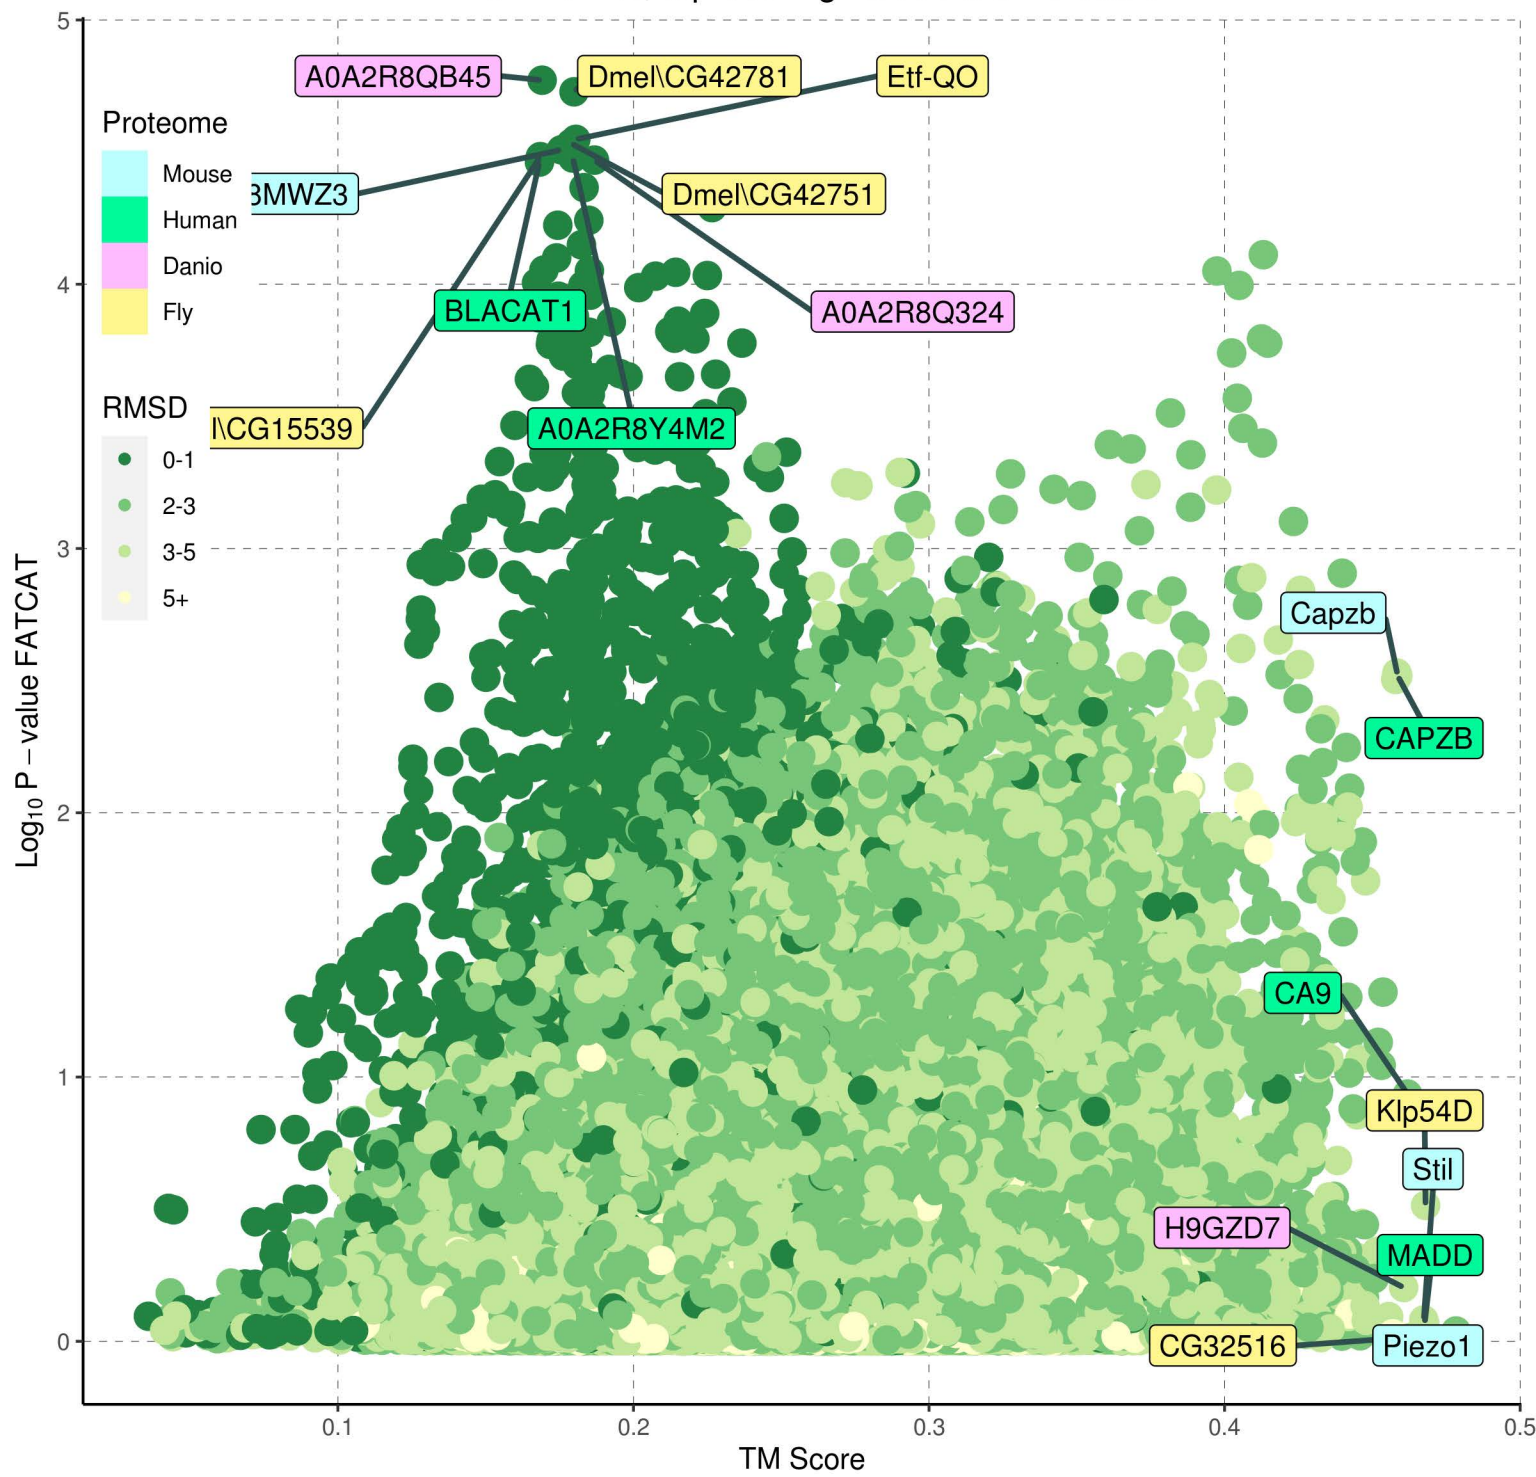

## A44

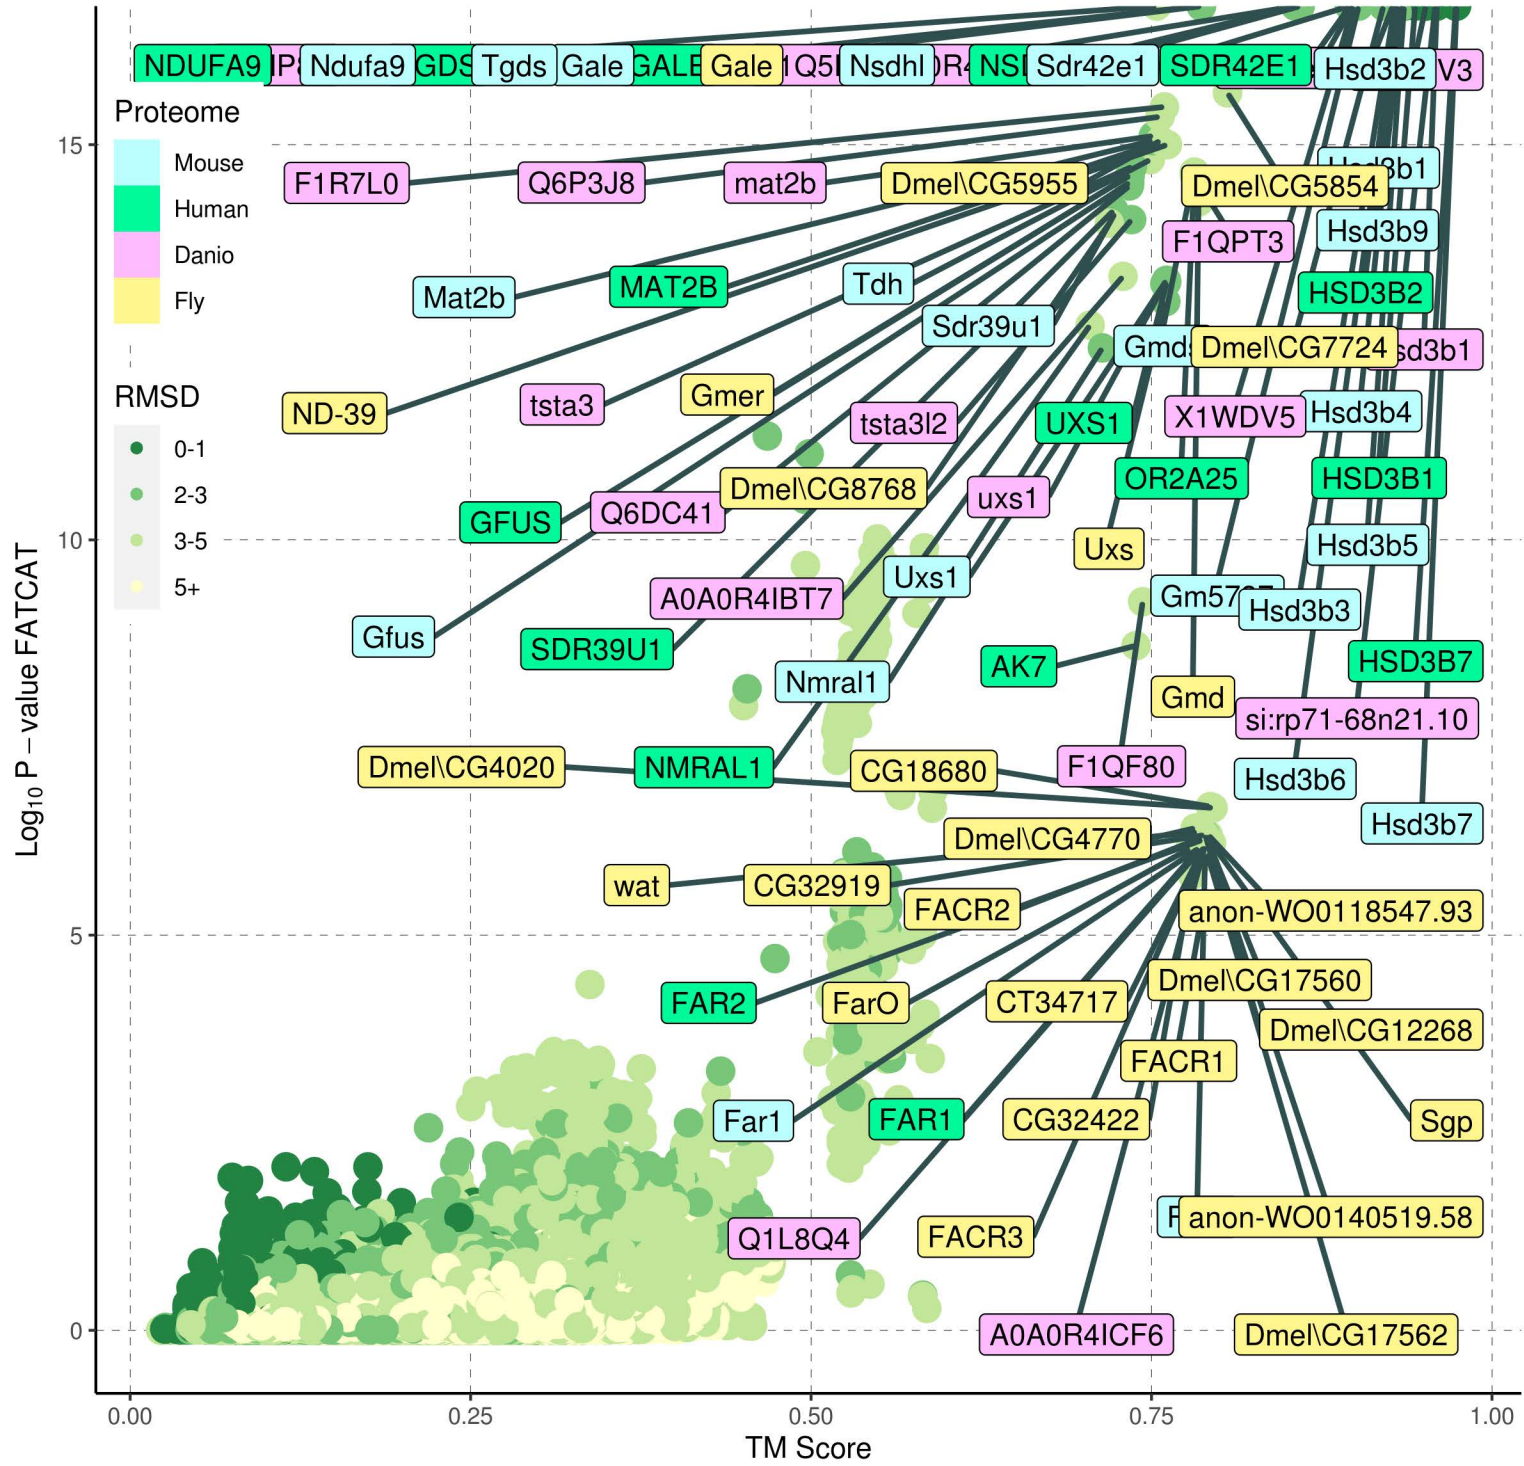

## A45

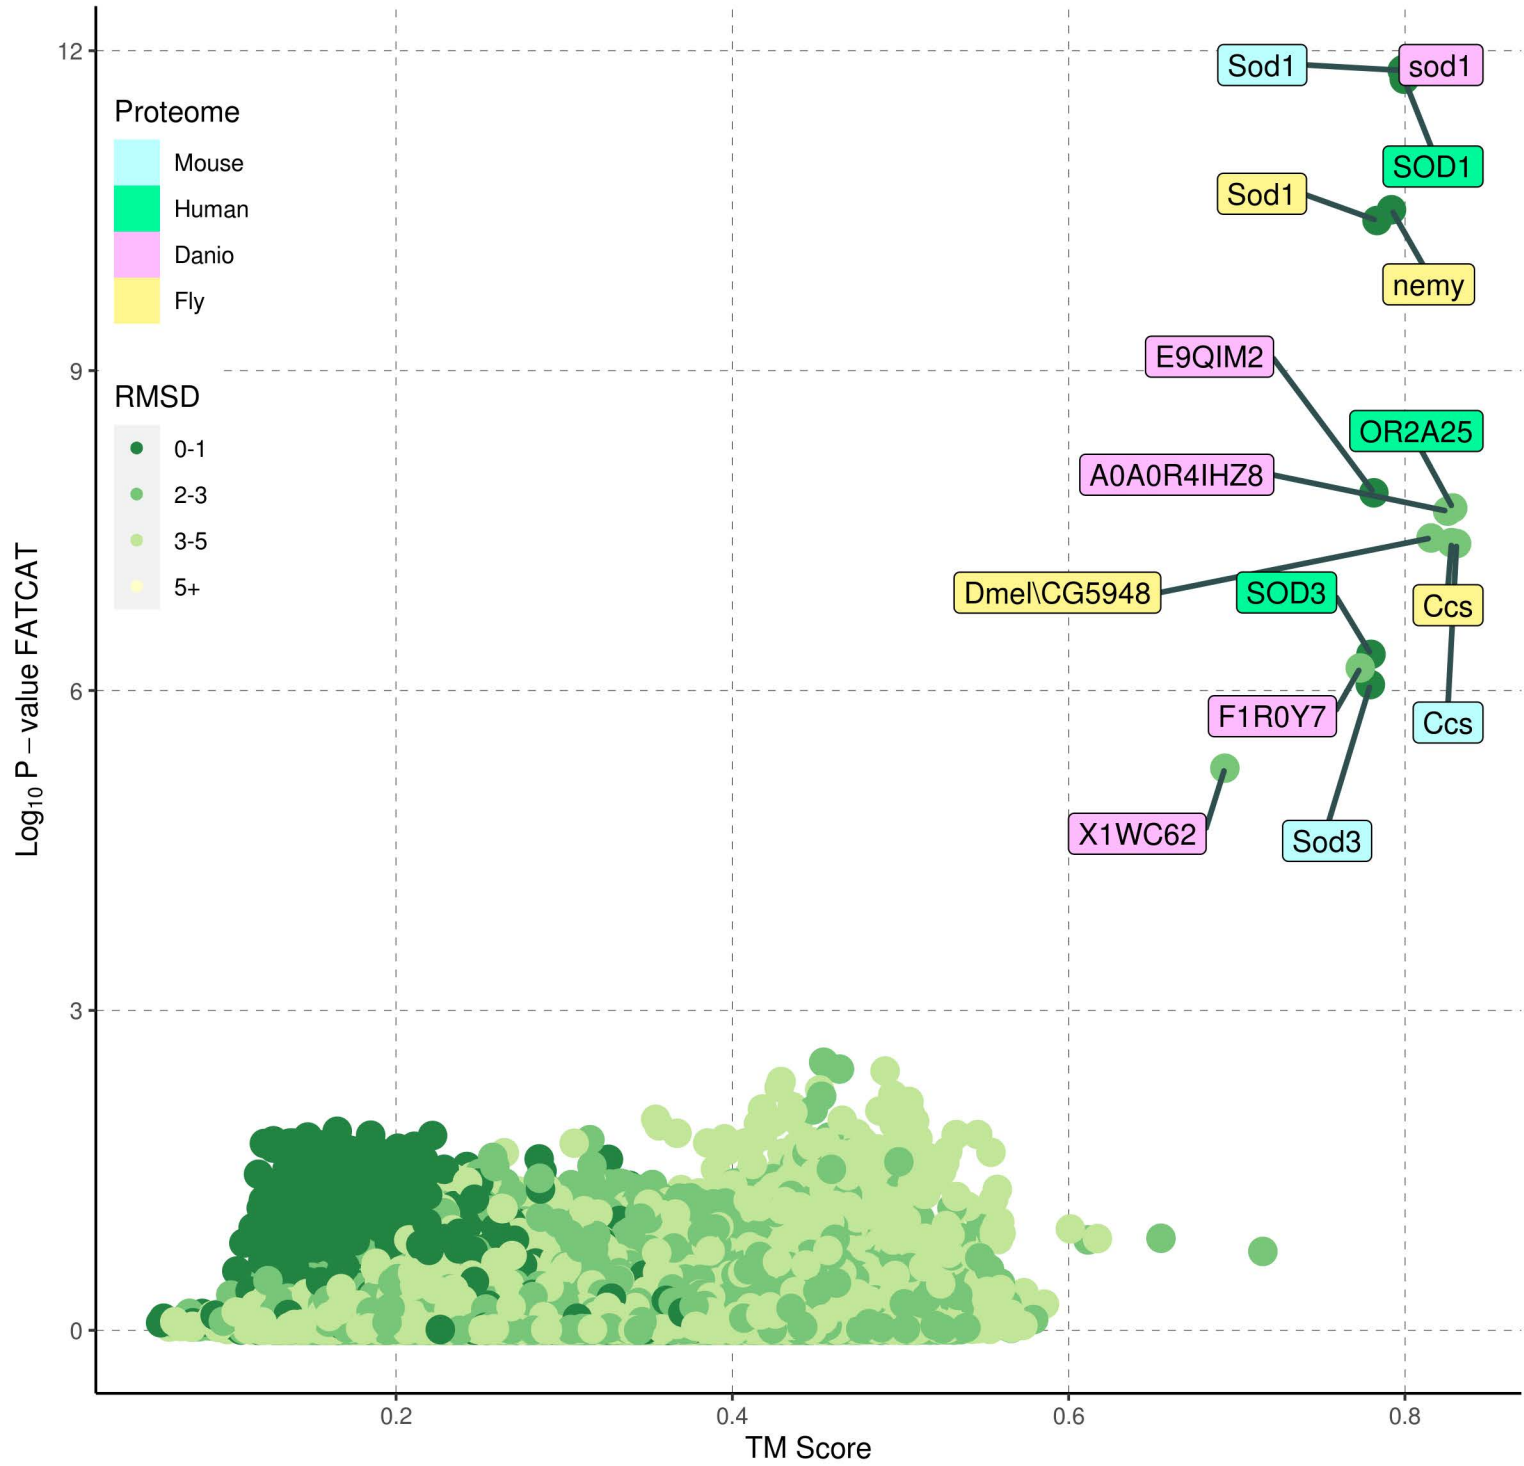

# A46 : No hits, top-scoring values are indicated

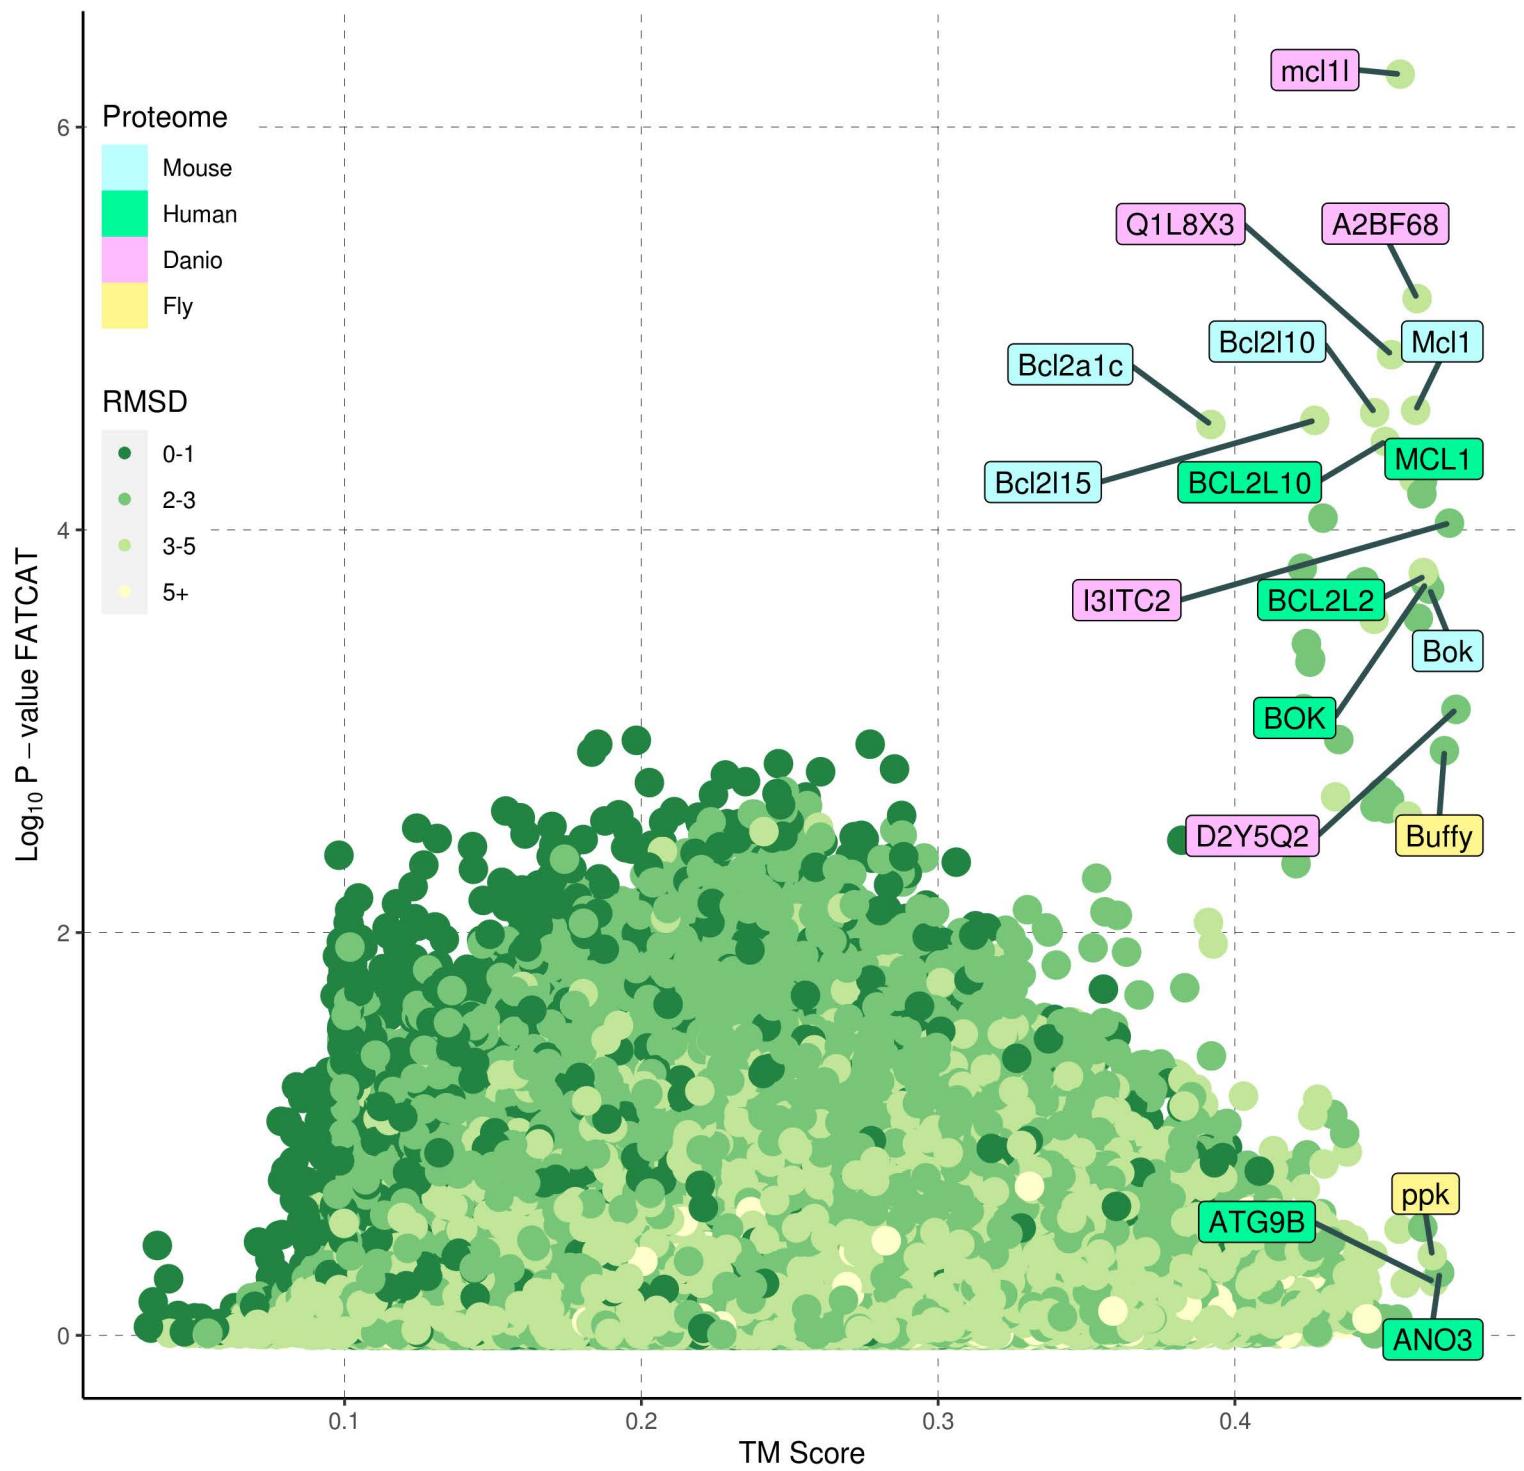

## A47

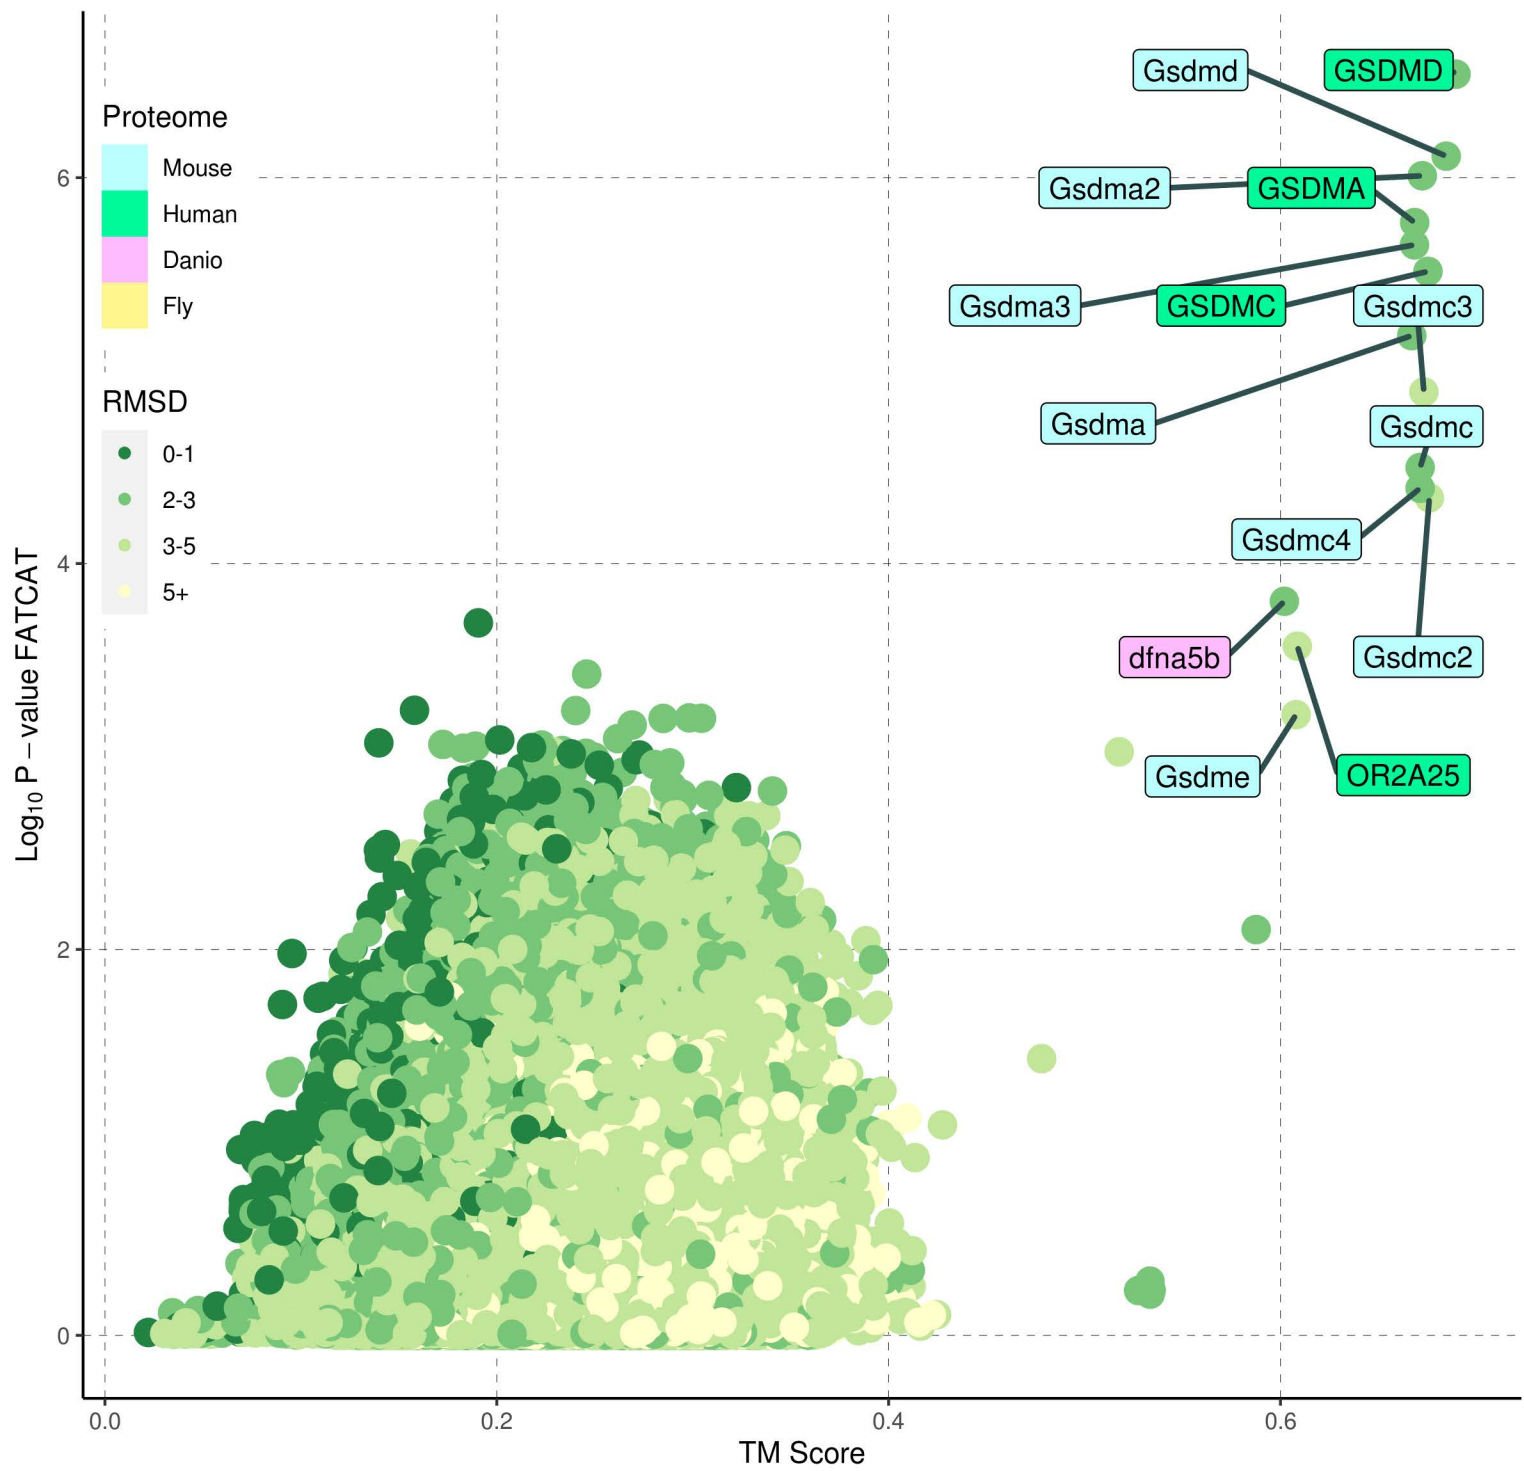

## A48

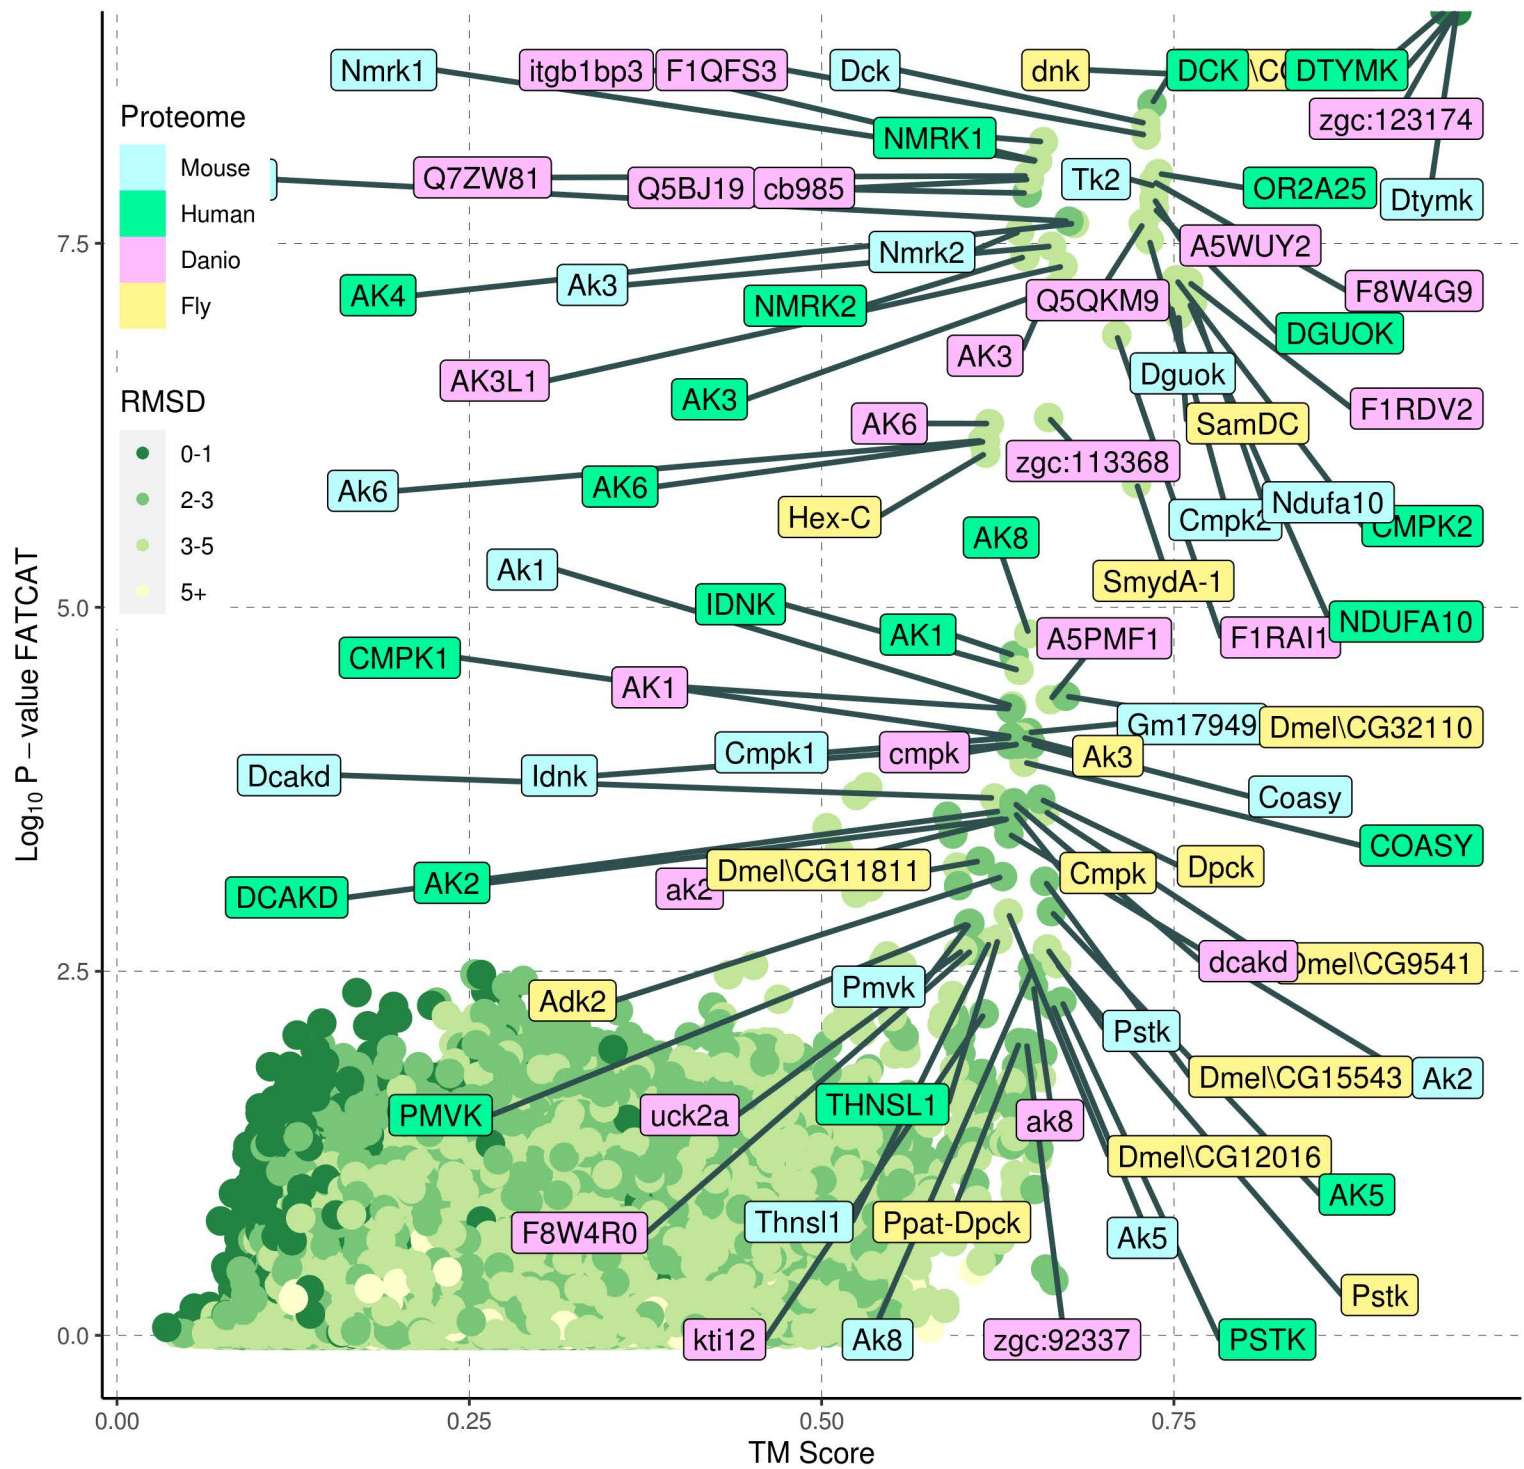

A49 : No hits, top-scoring values are indicated

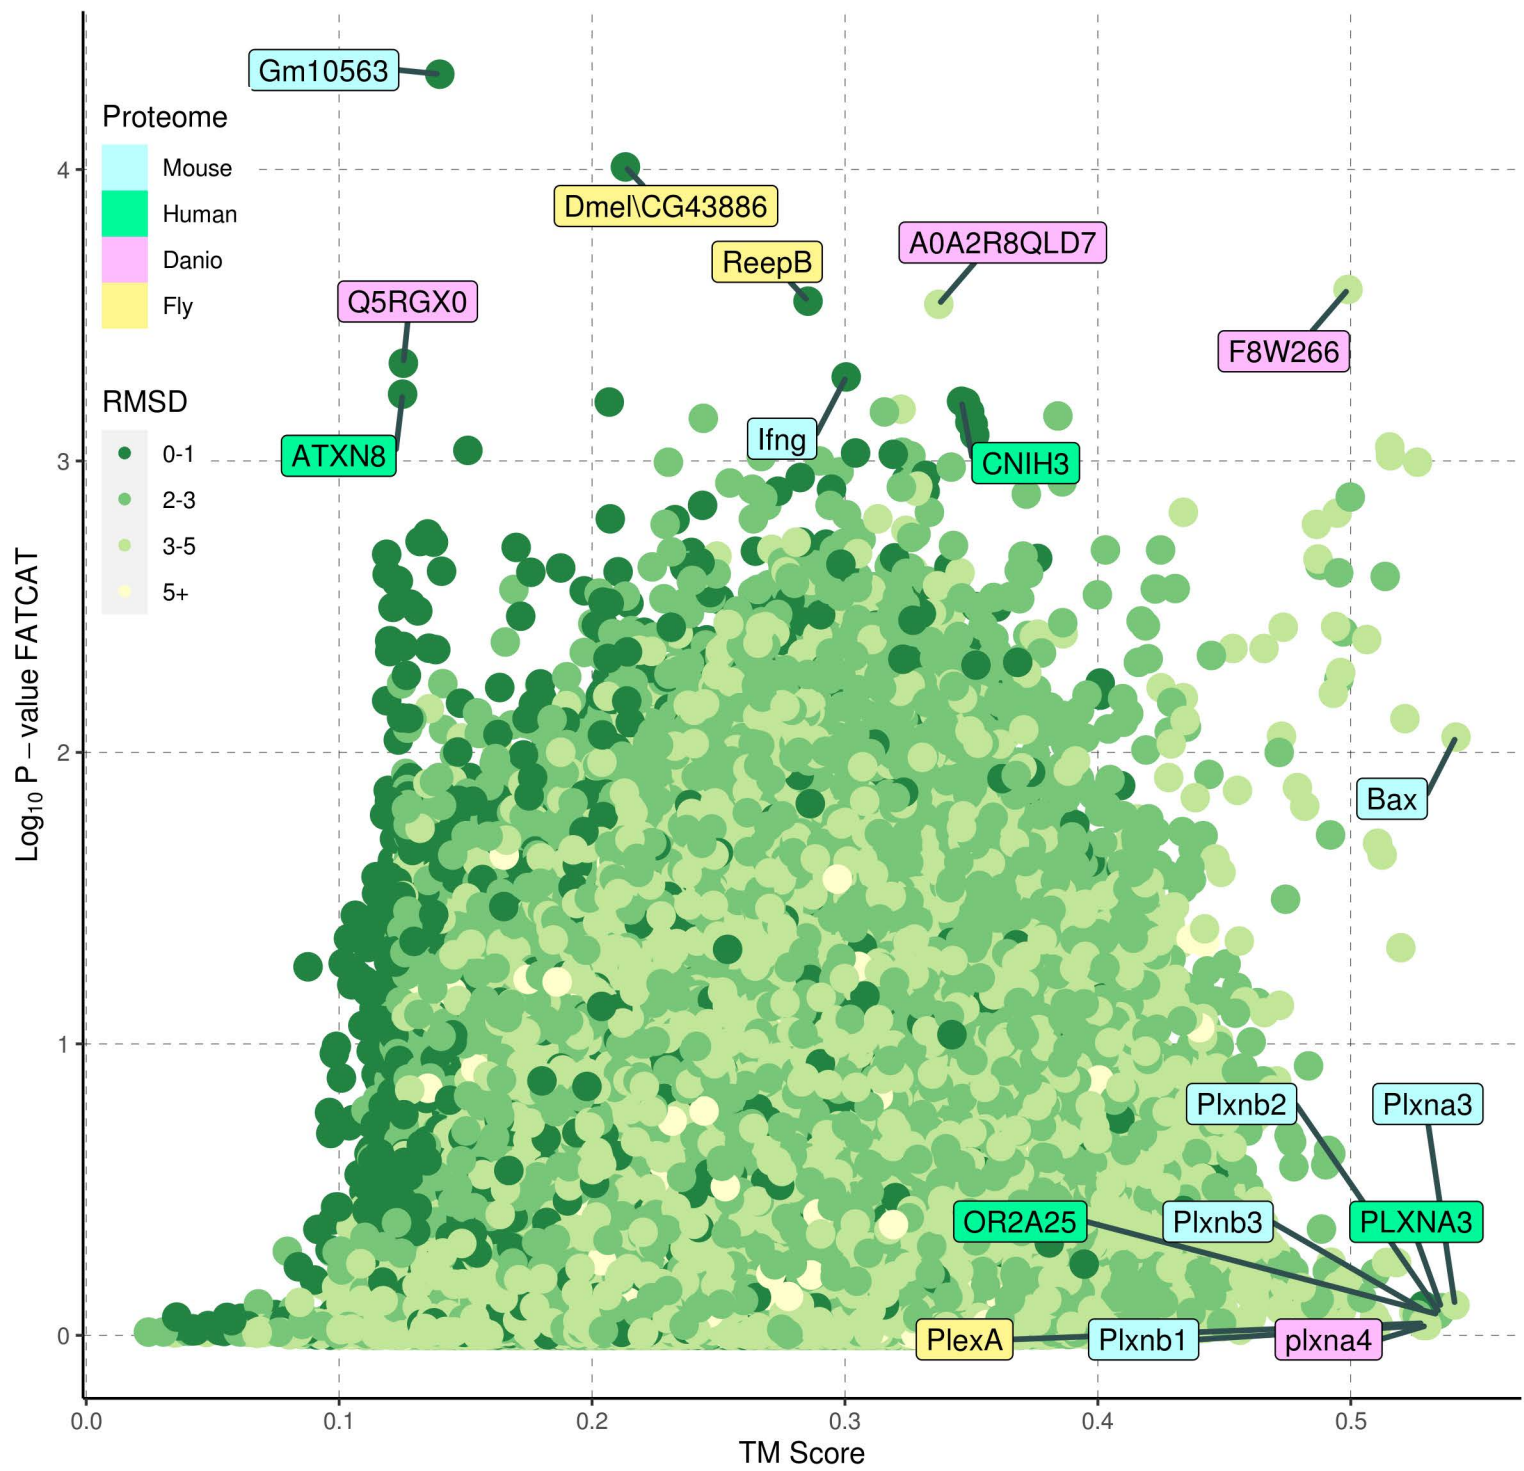

A50

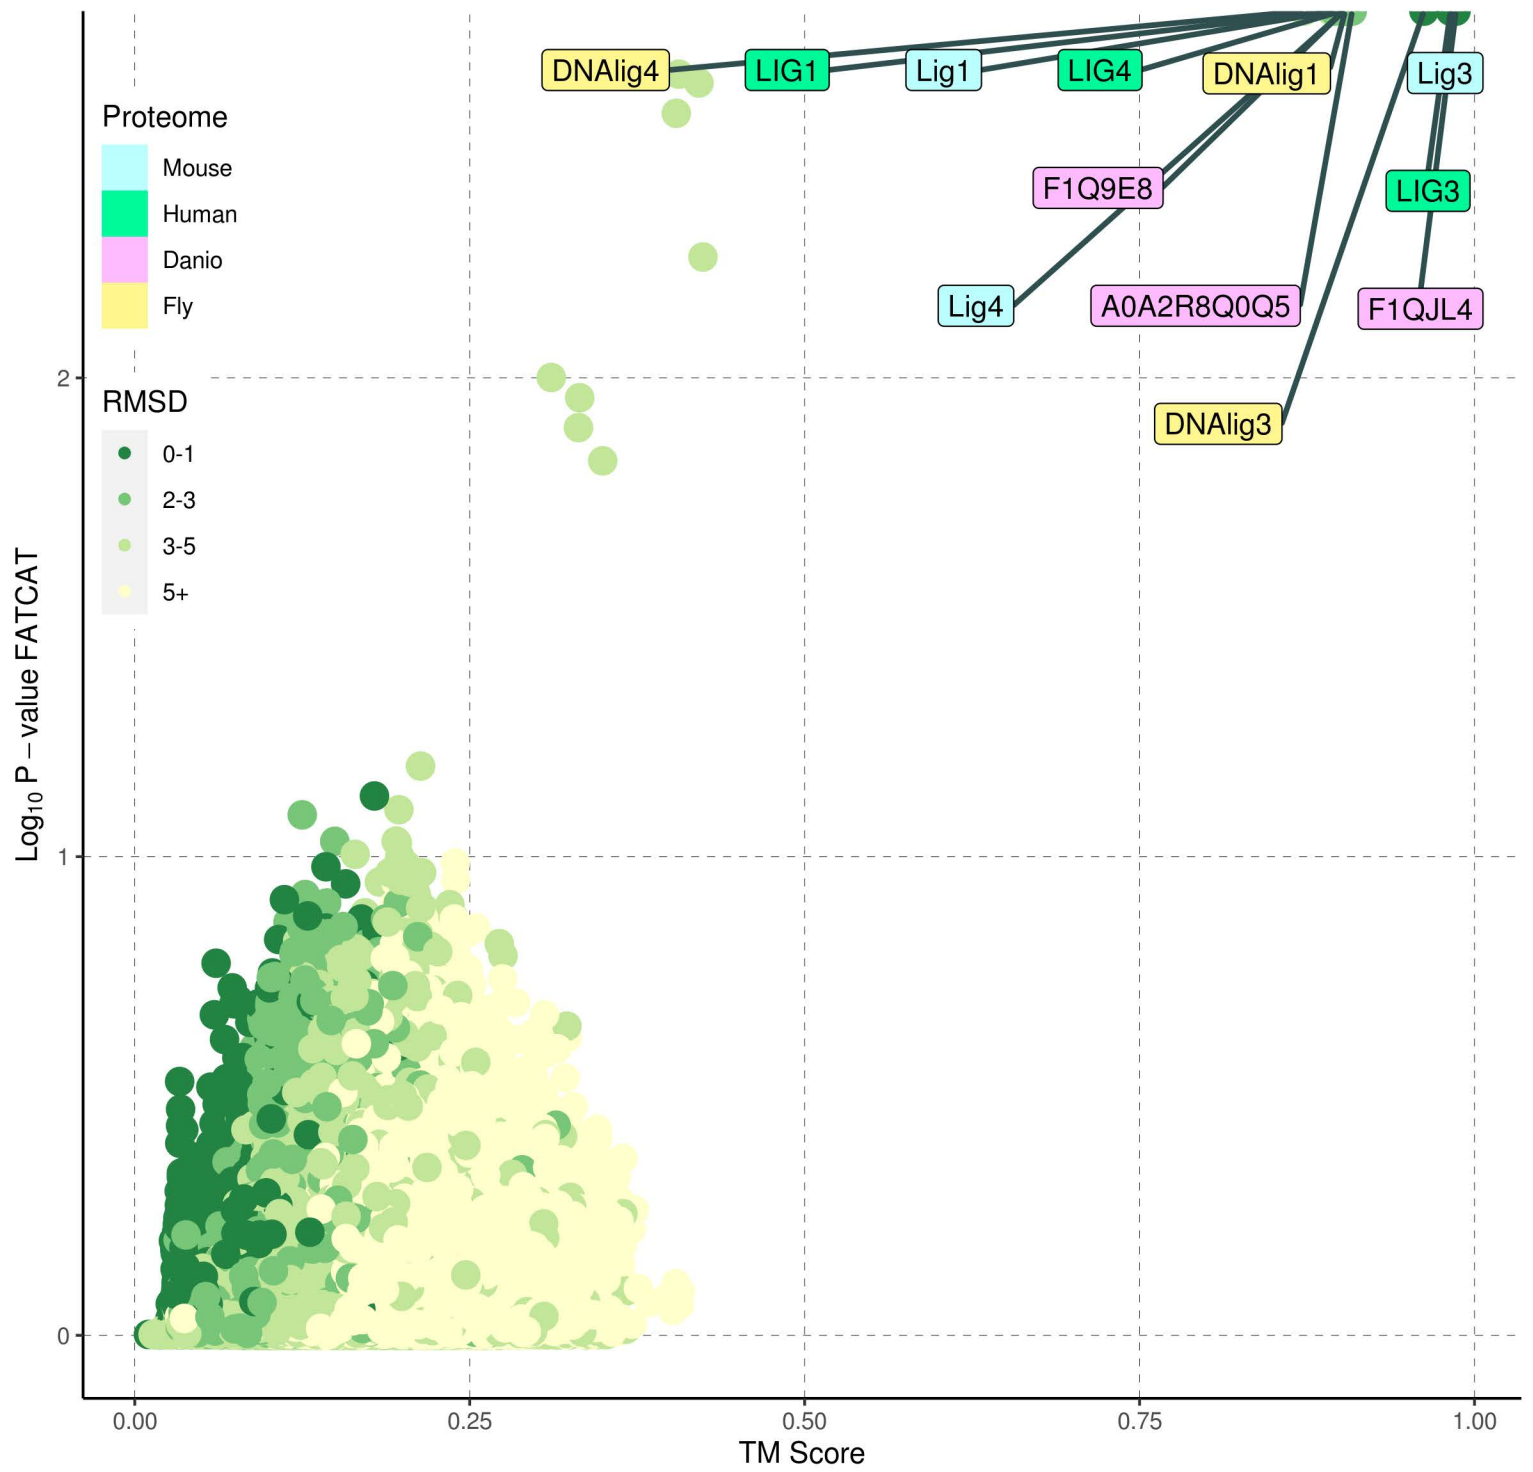



# A51 : No hits, top-scoring values are indicated

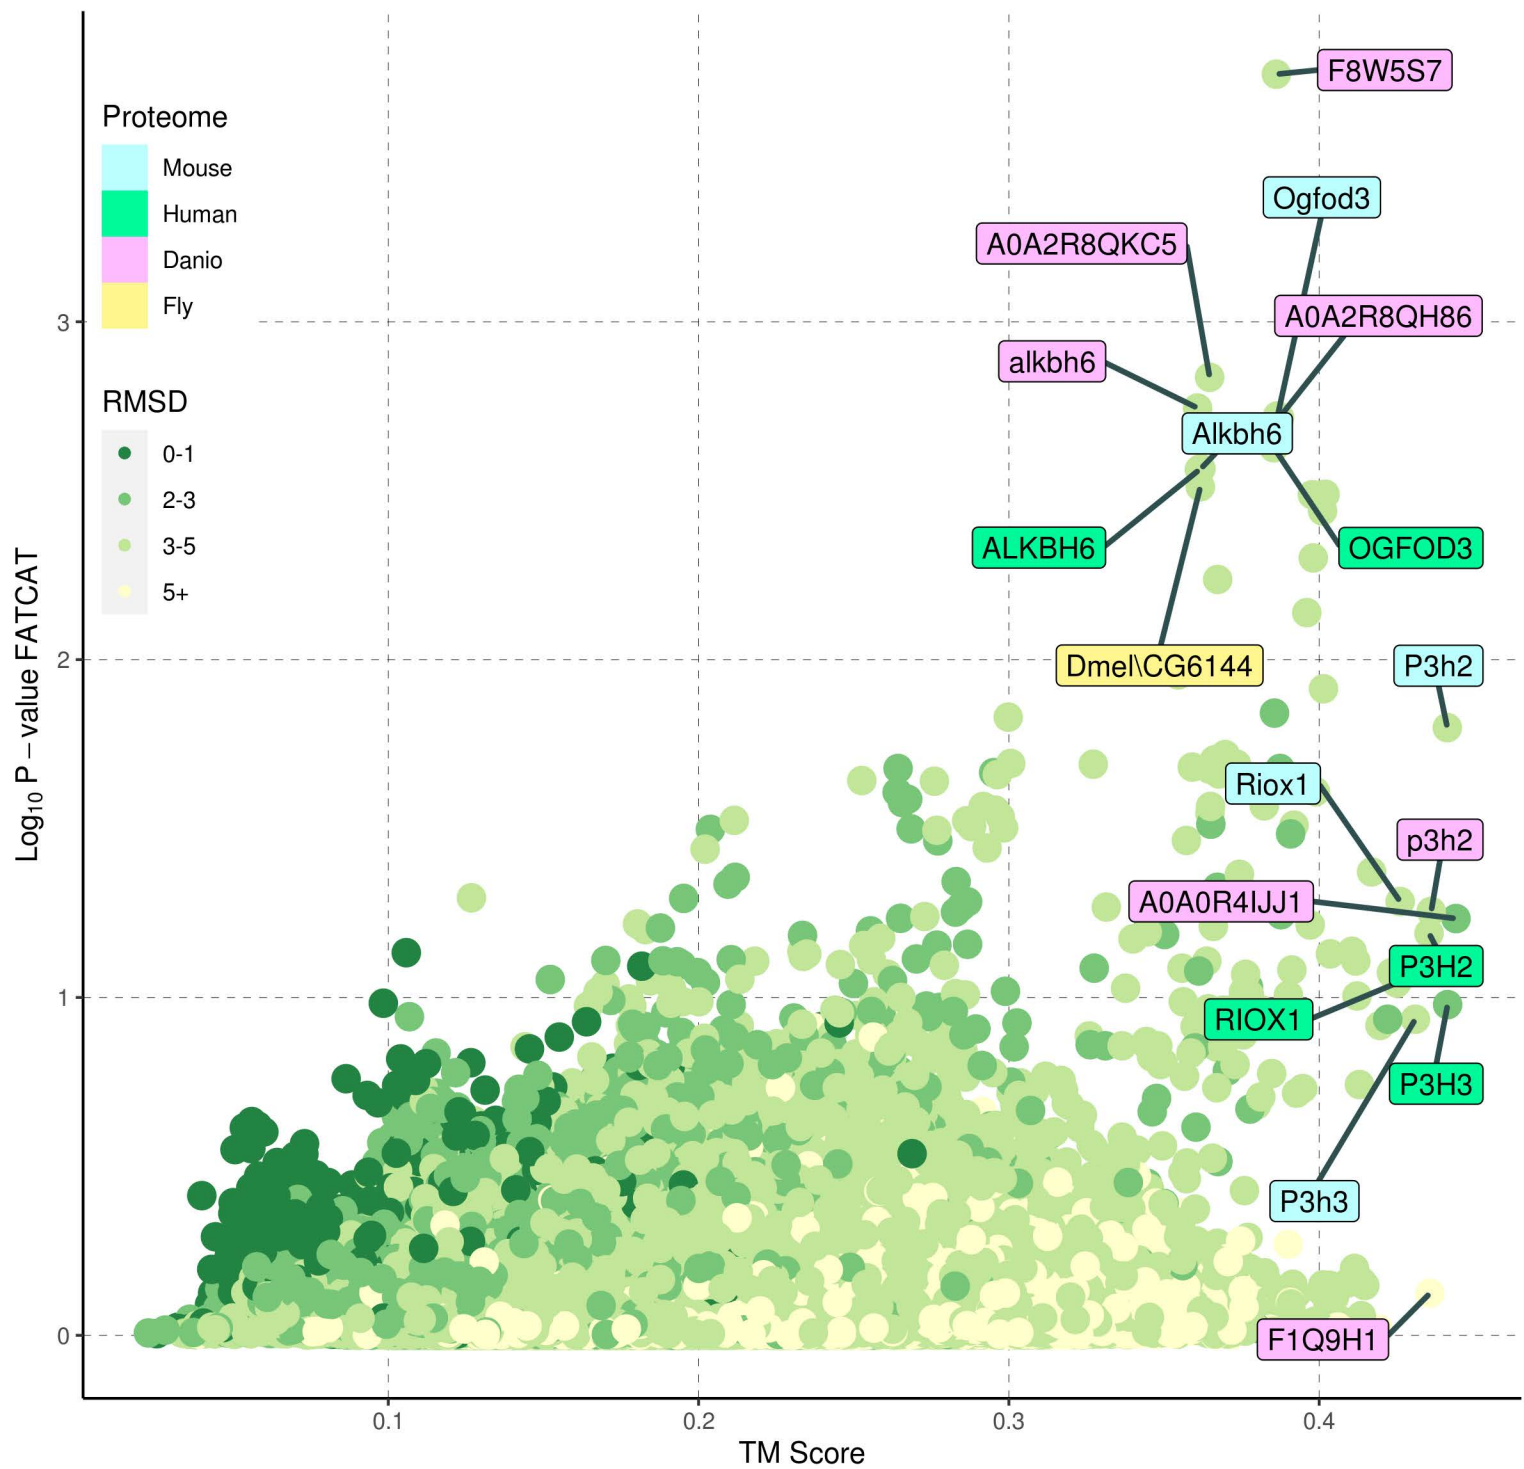

A52 : No hits, top-scoring values are indicated

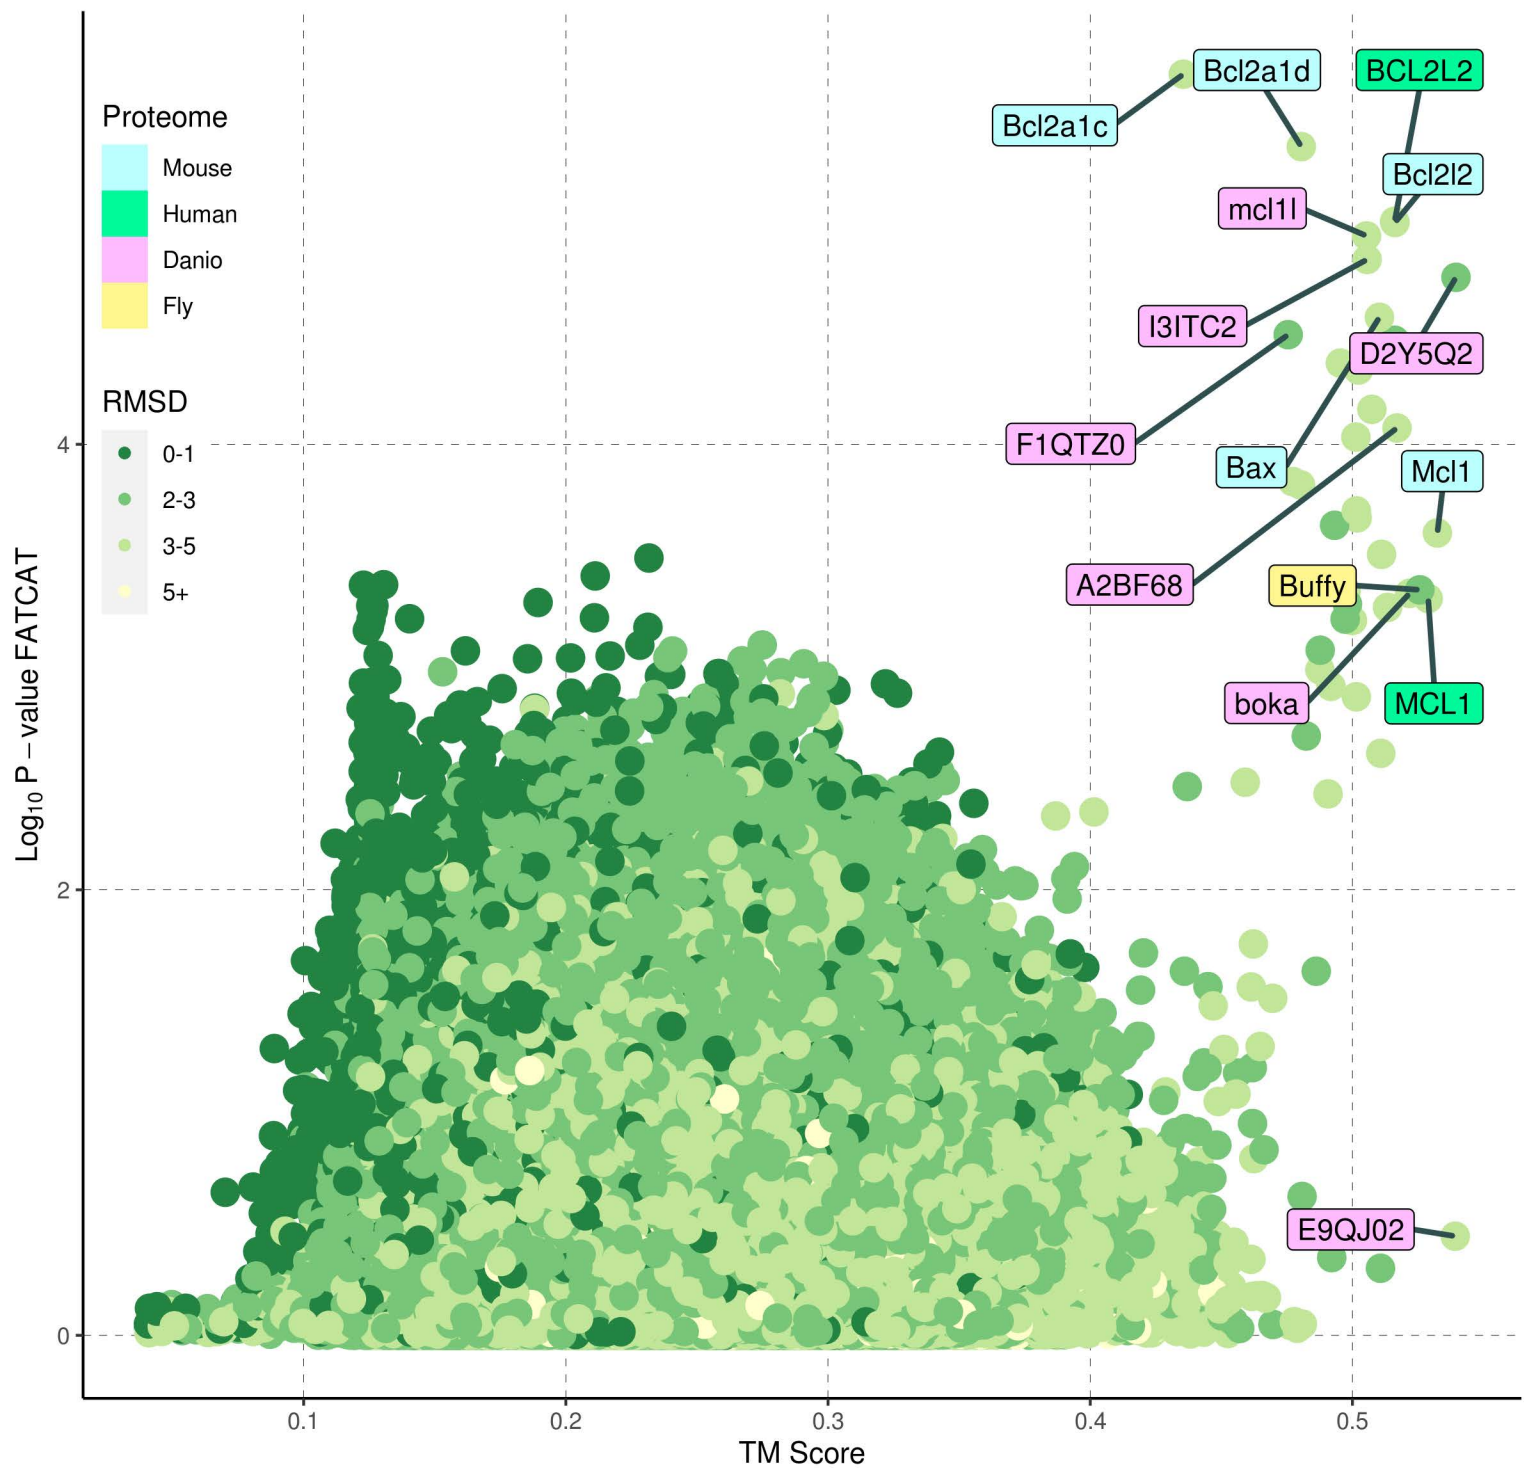

## A53

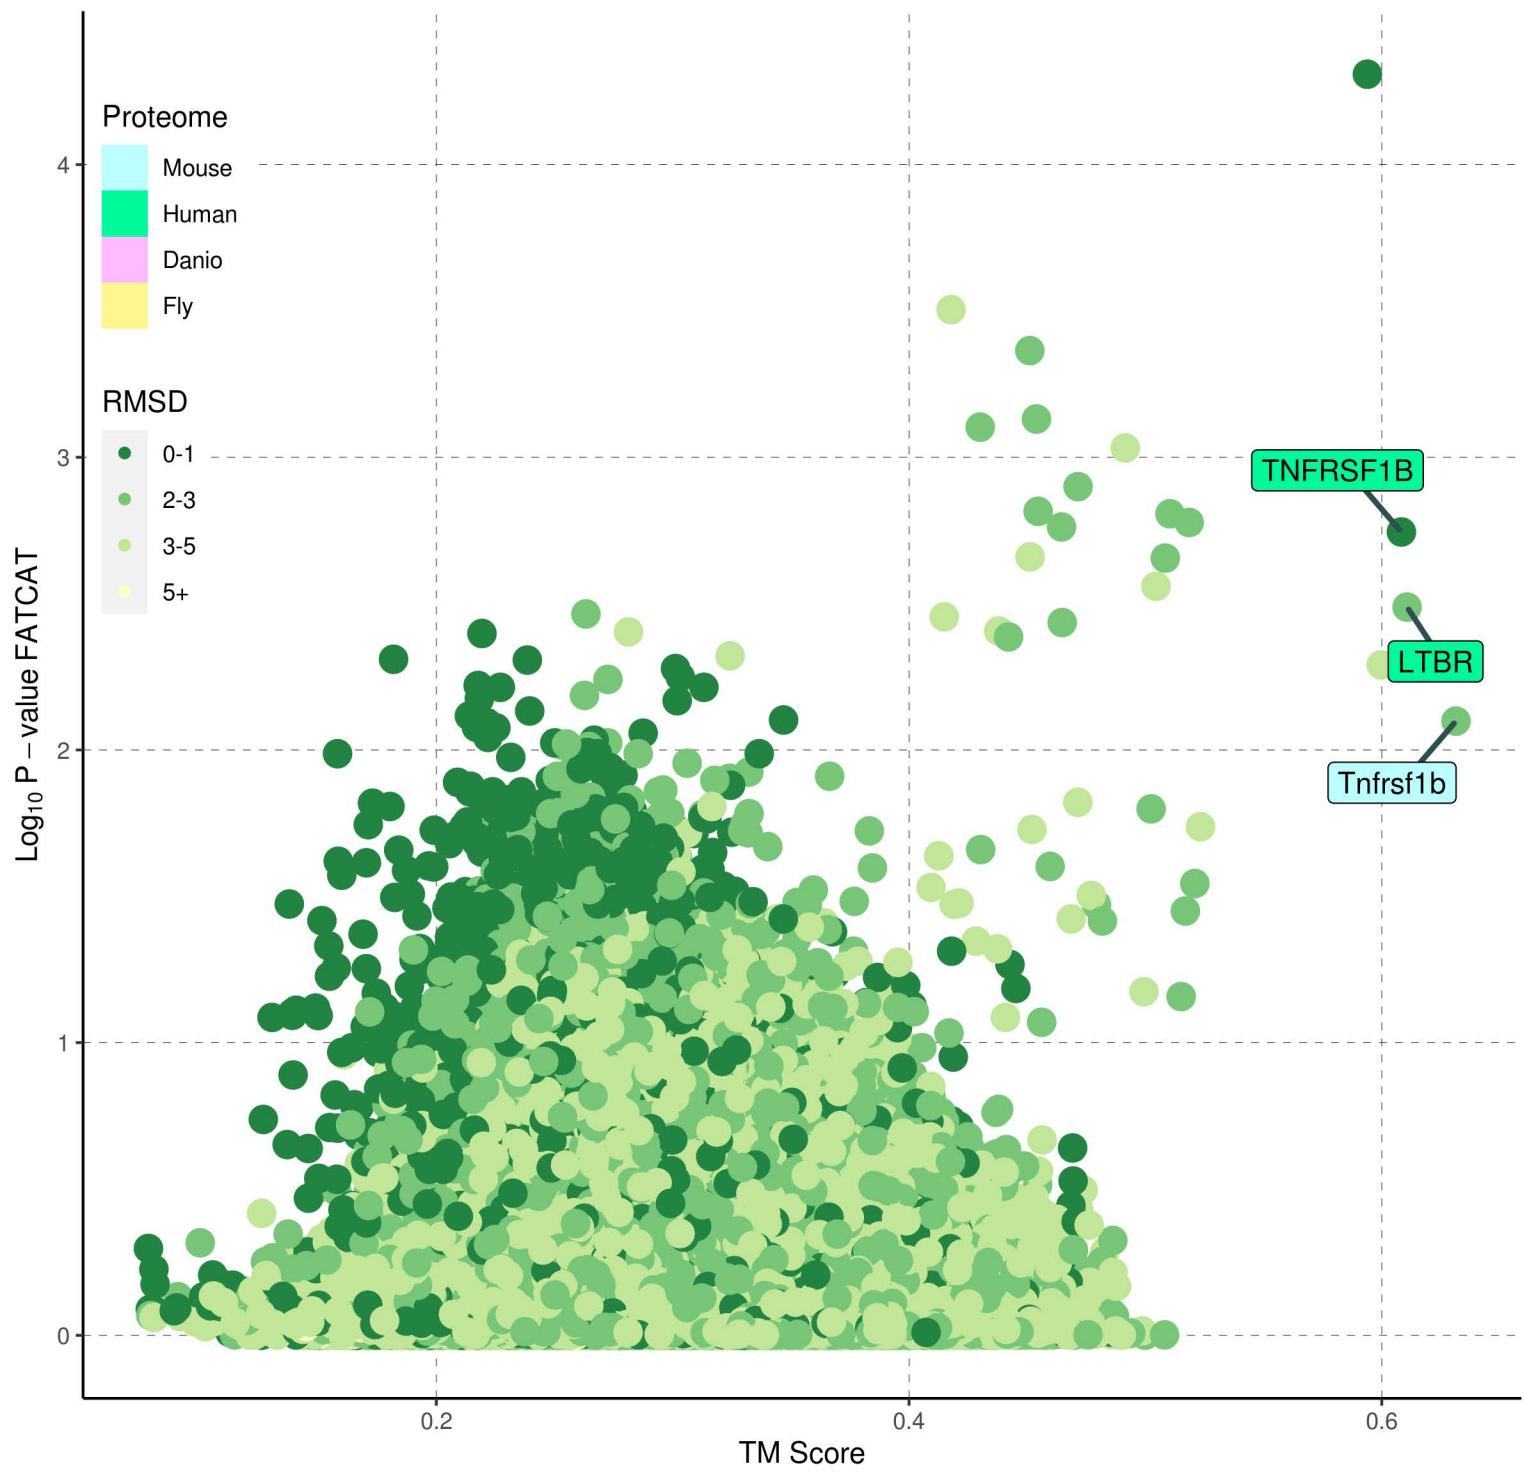



## A55

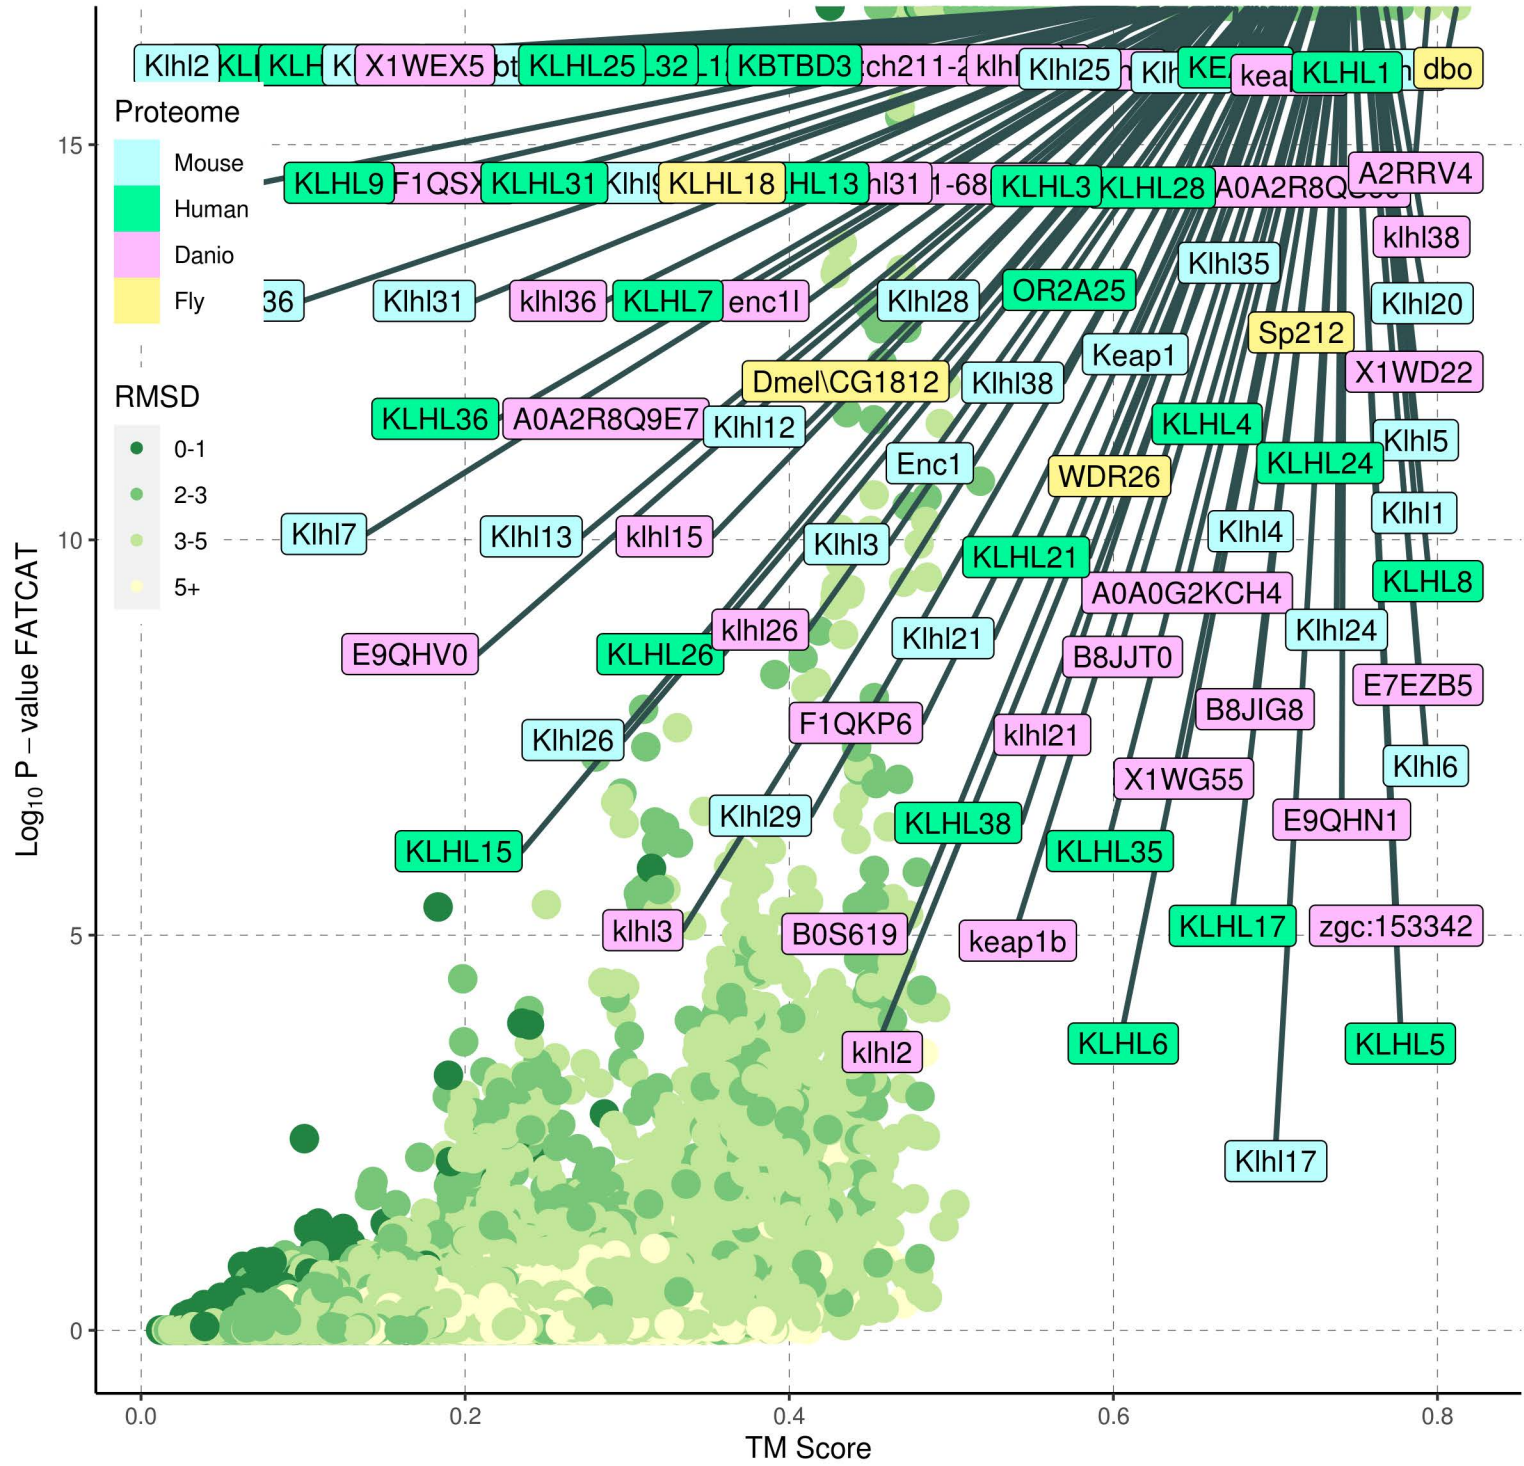

A56 : No hits, top-scoring values are indicated

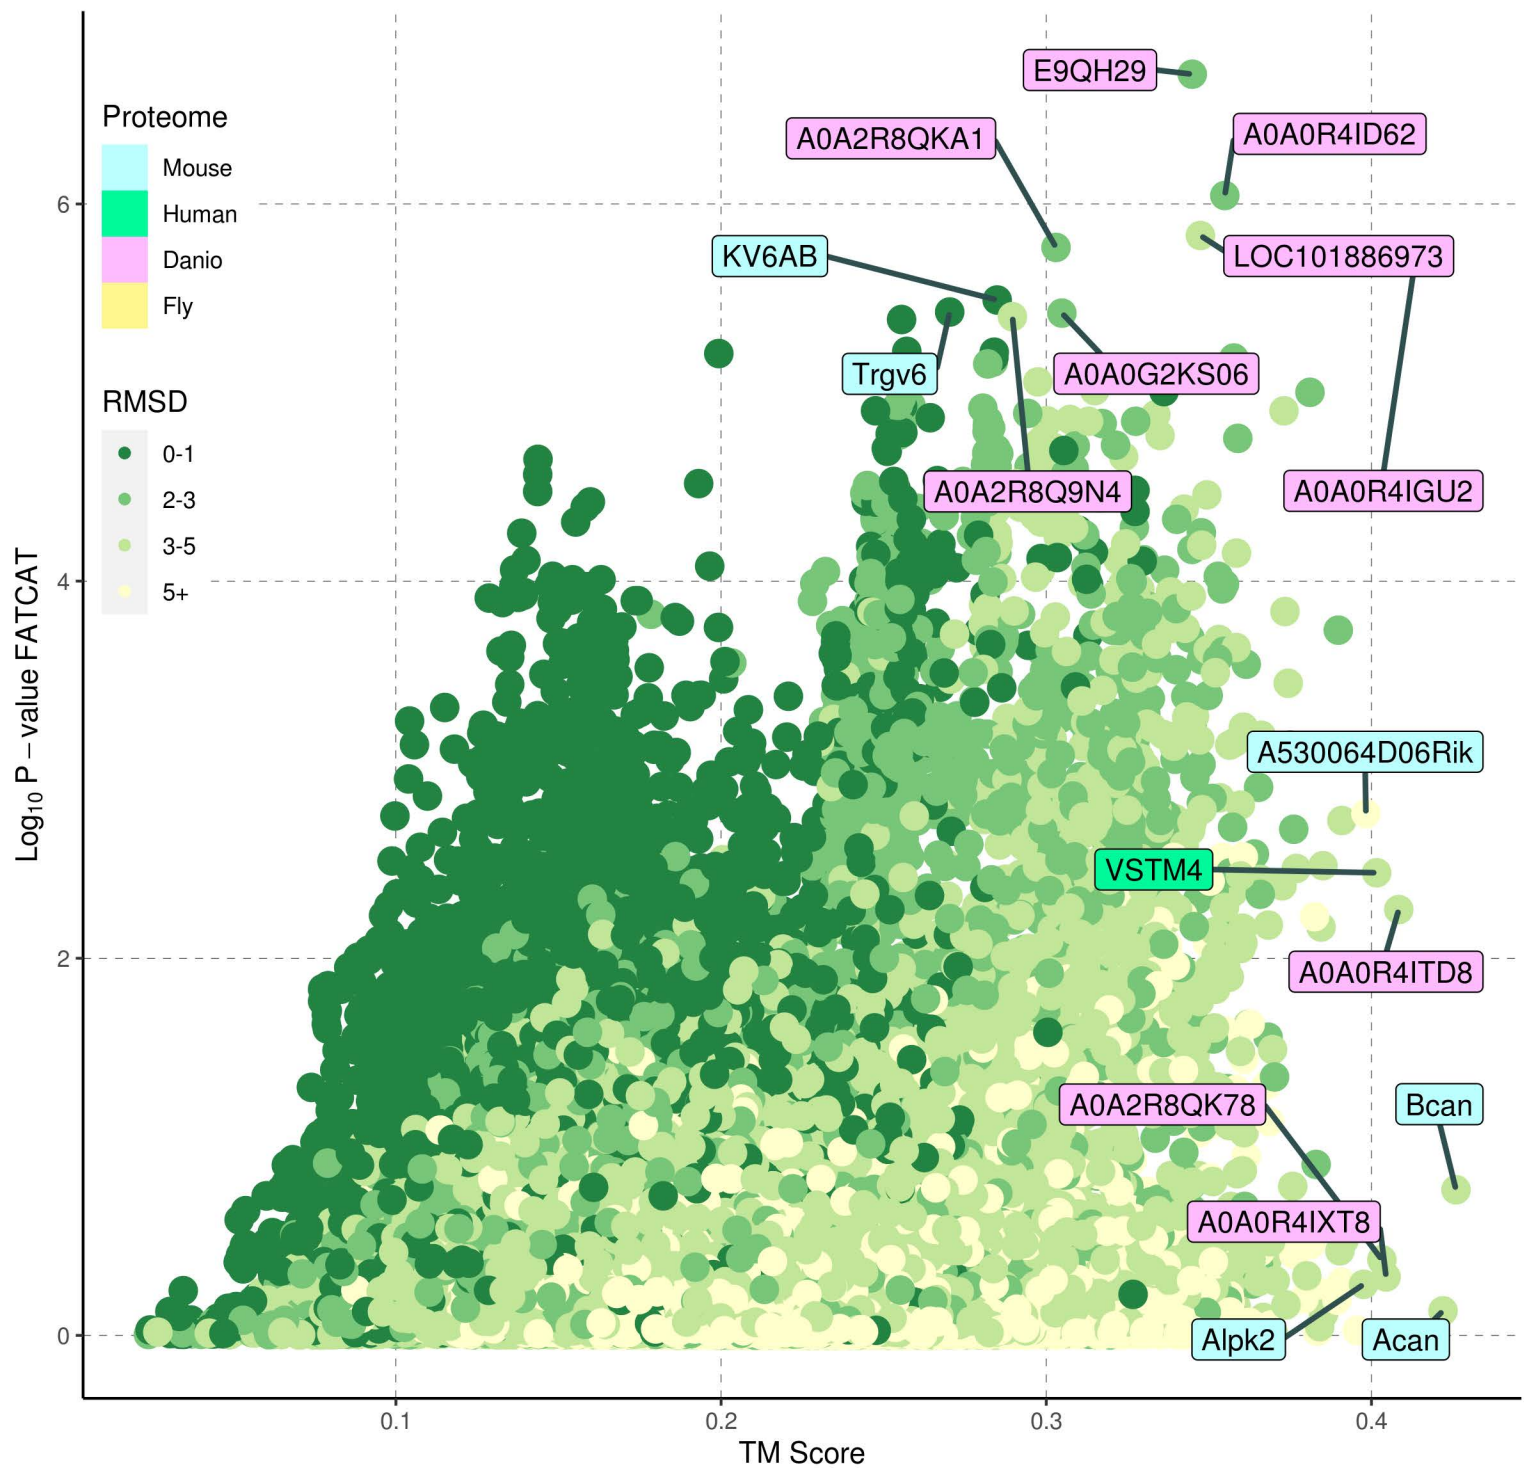



AorfA : No hits, top-scoring values are indicated

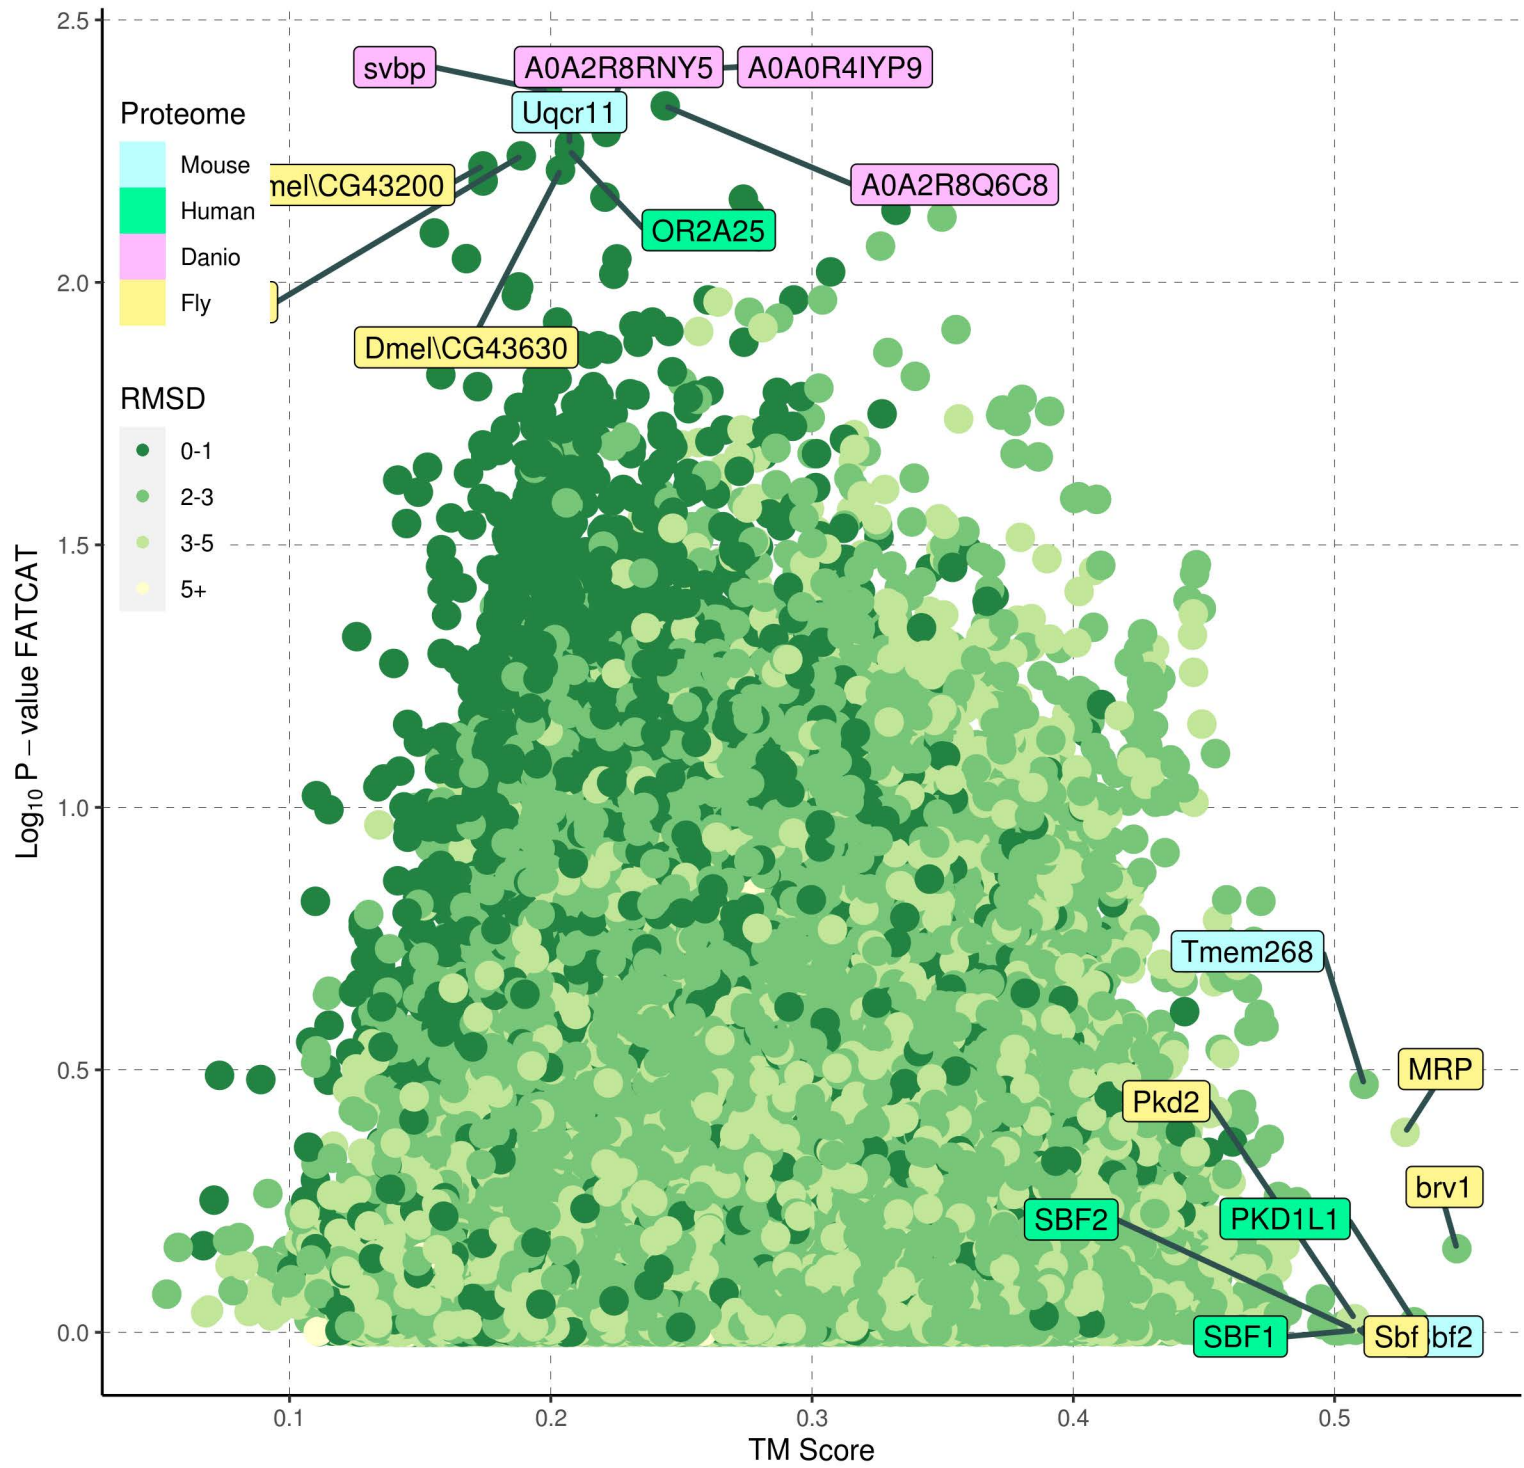





# Aorfc : No hits, top-scoring values are indicated

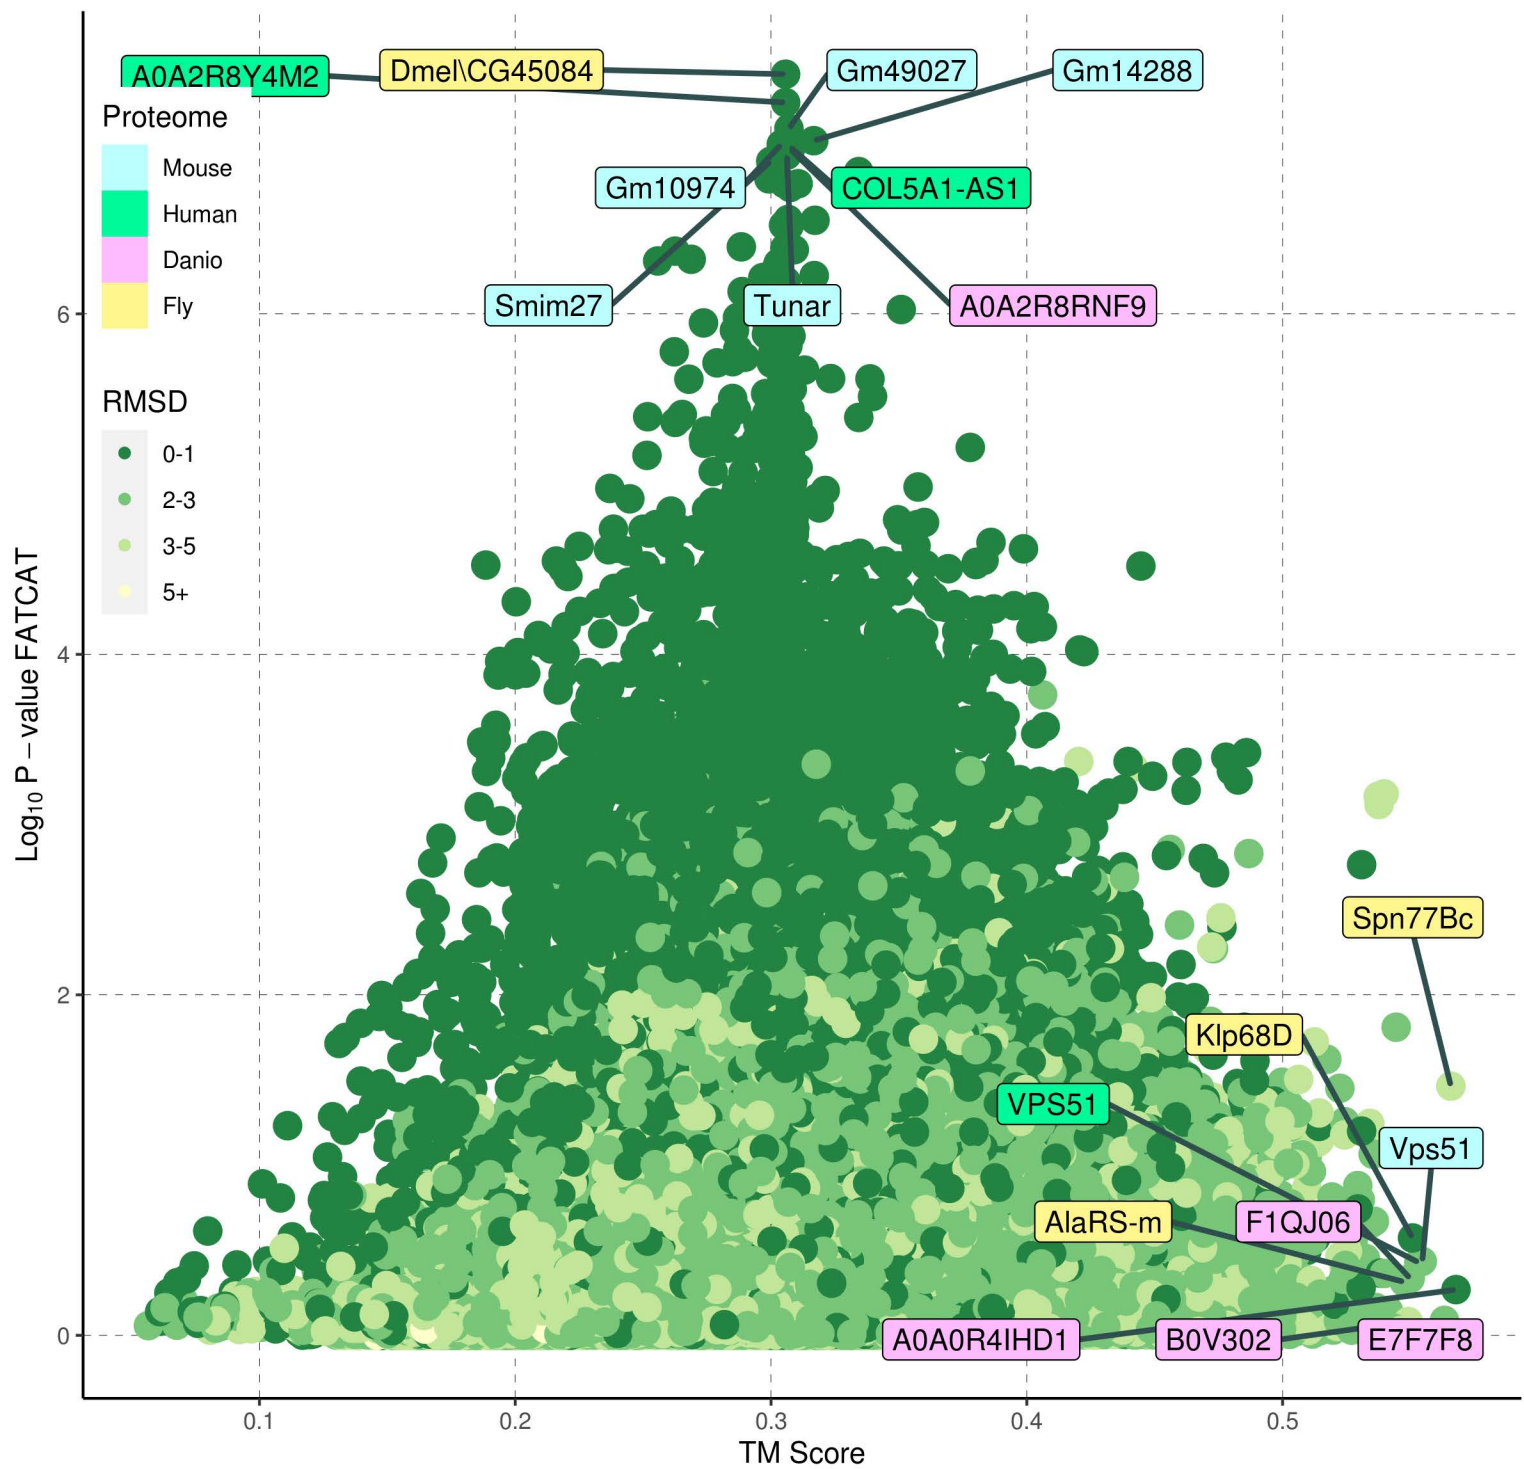

## AorfD

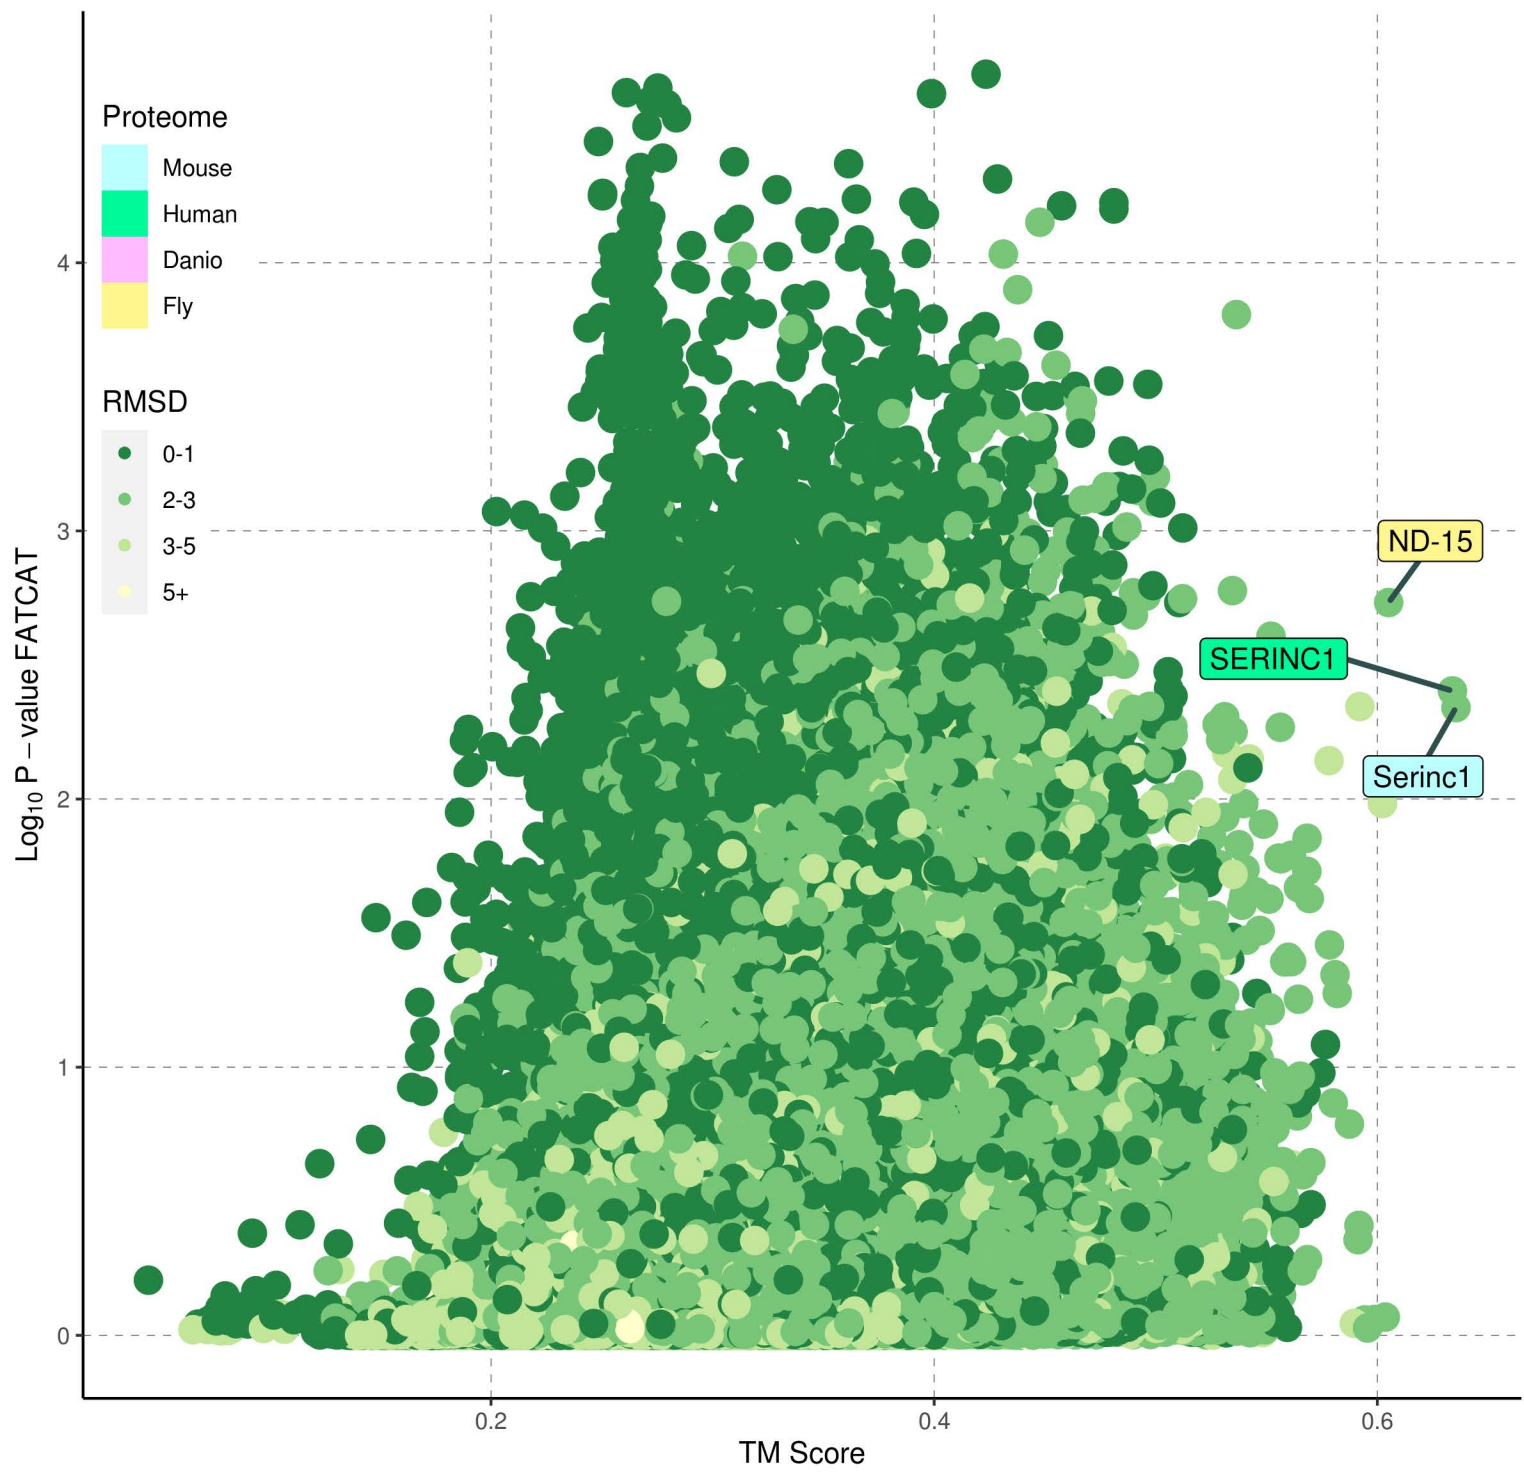

AorfE : No hits, top-scoring values are indicated

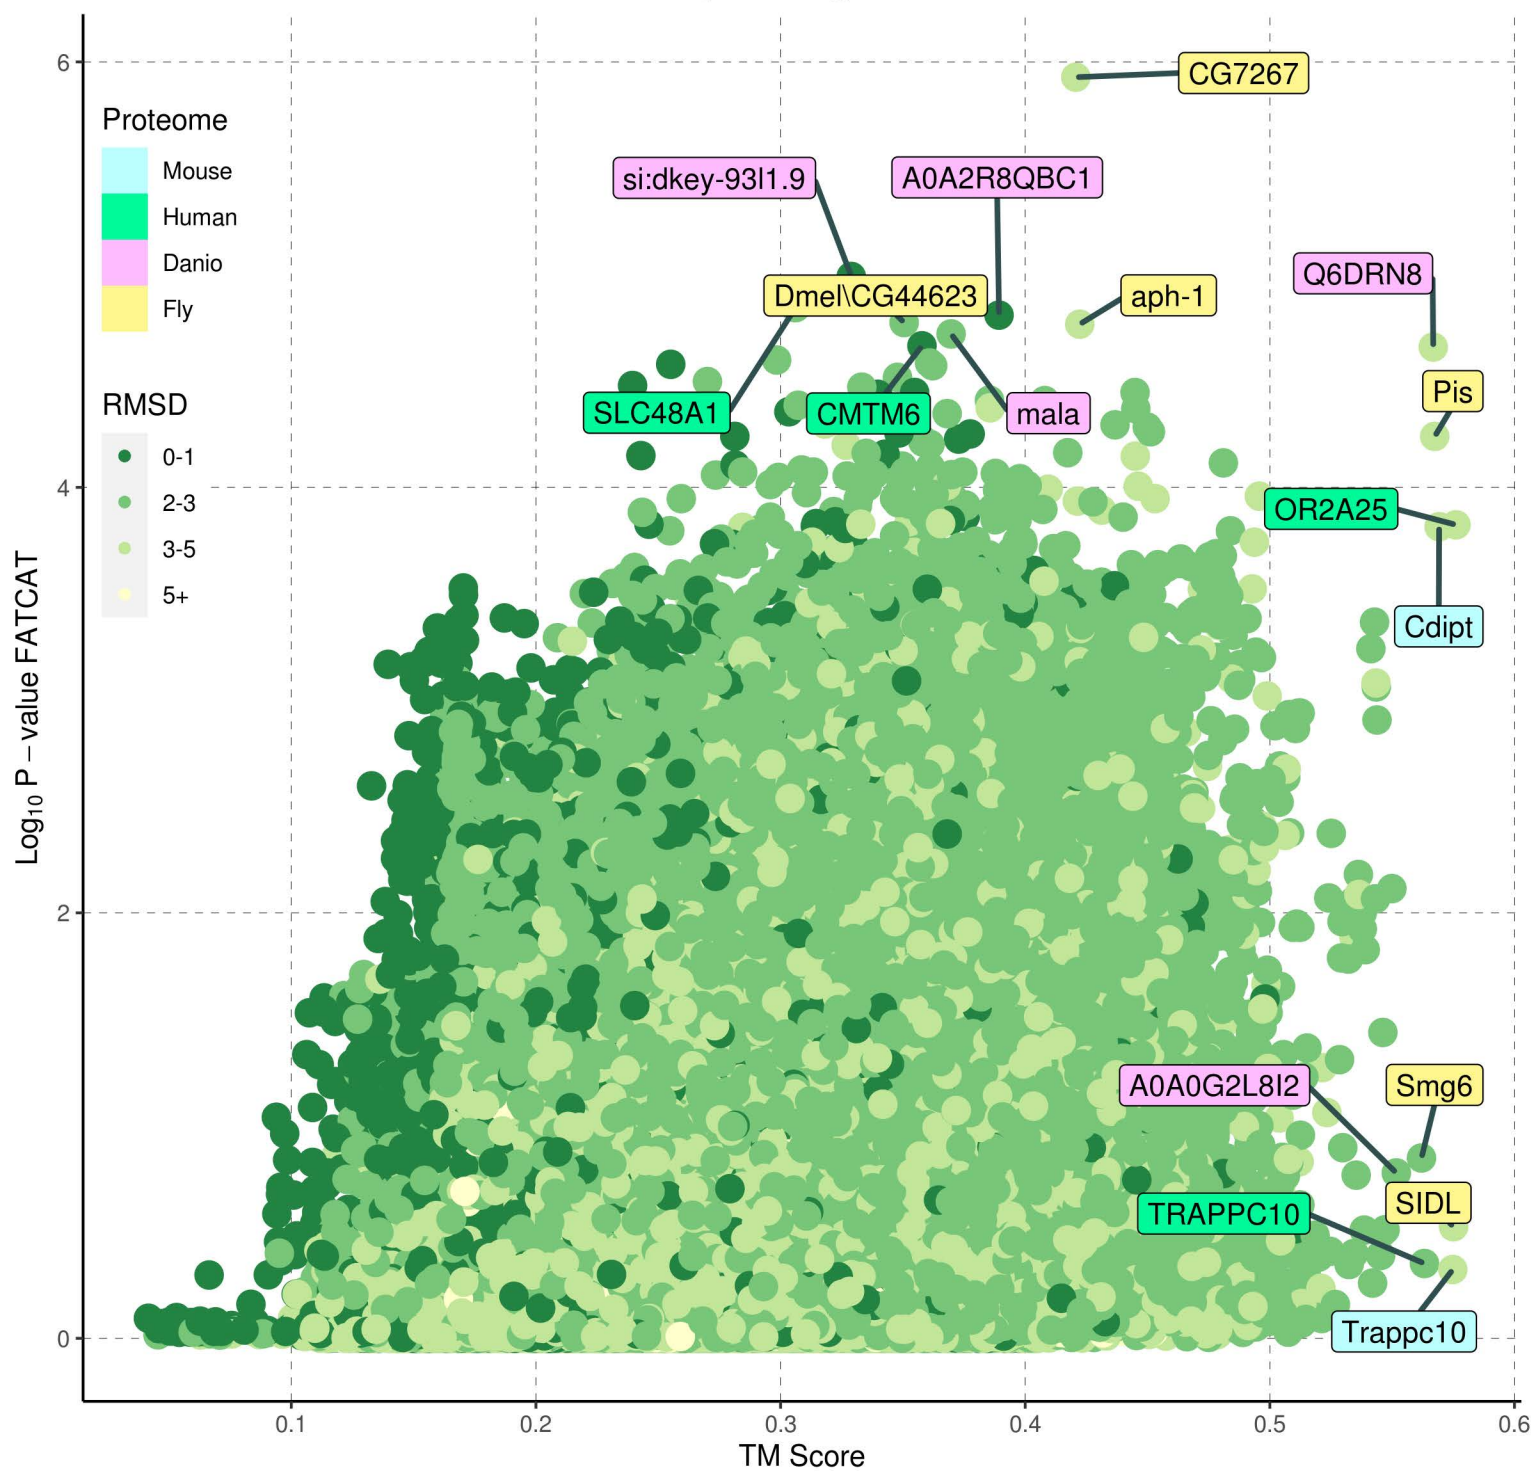

AorfF : No hits, top-scoring values are indicated

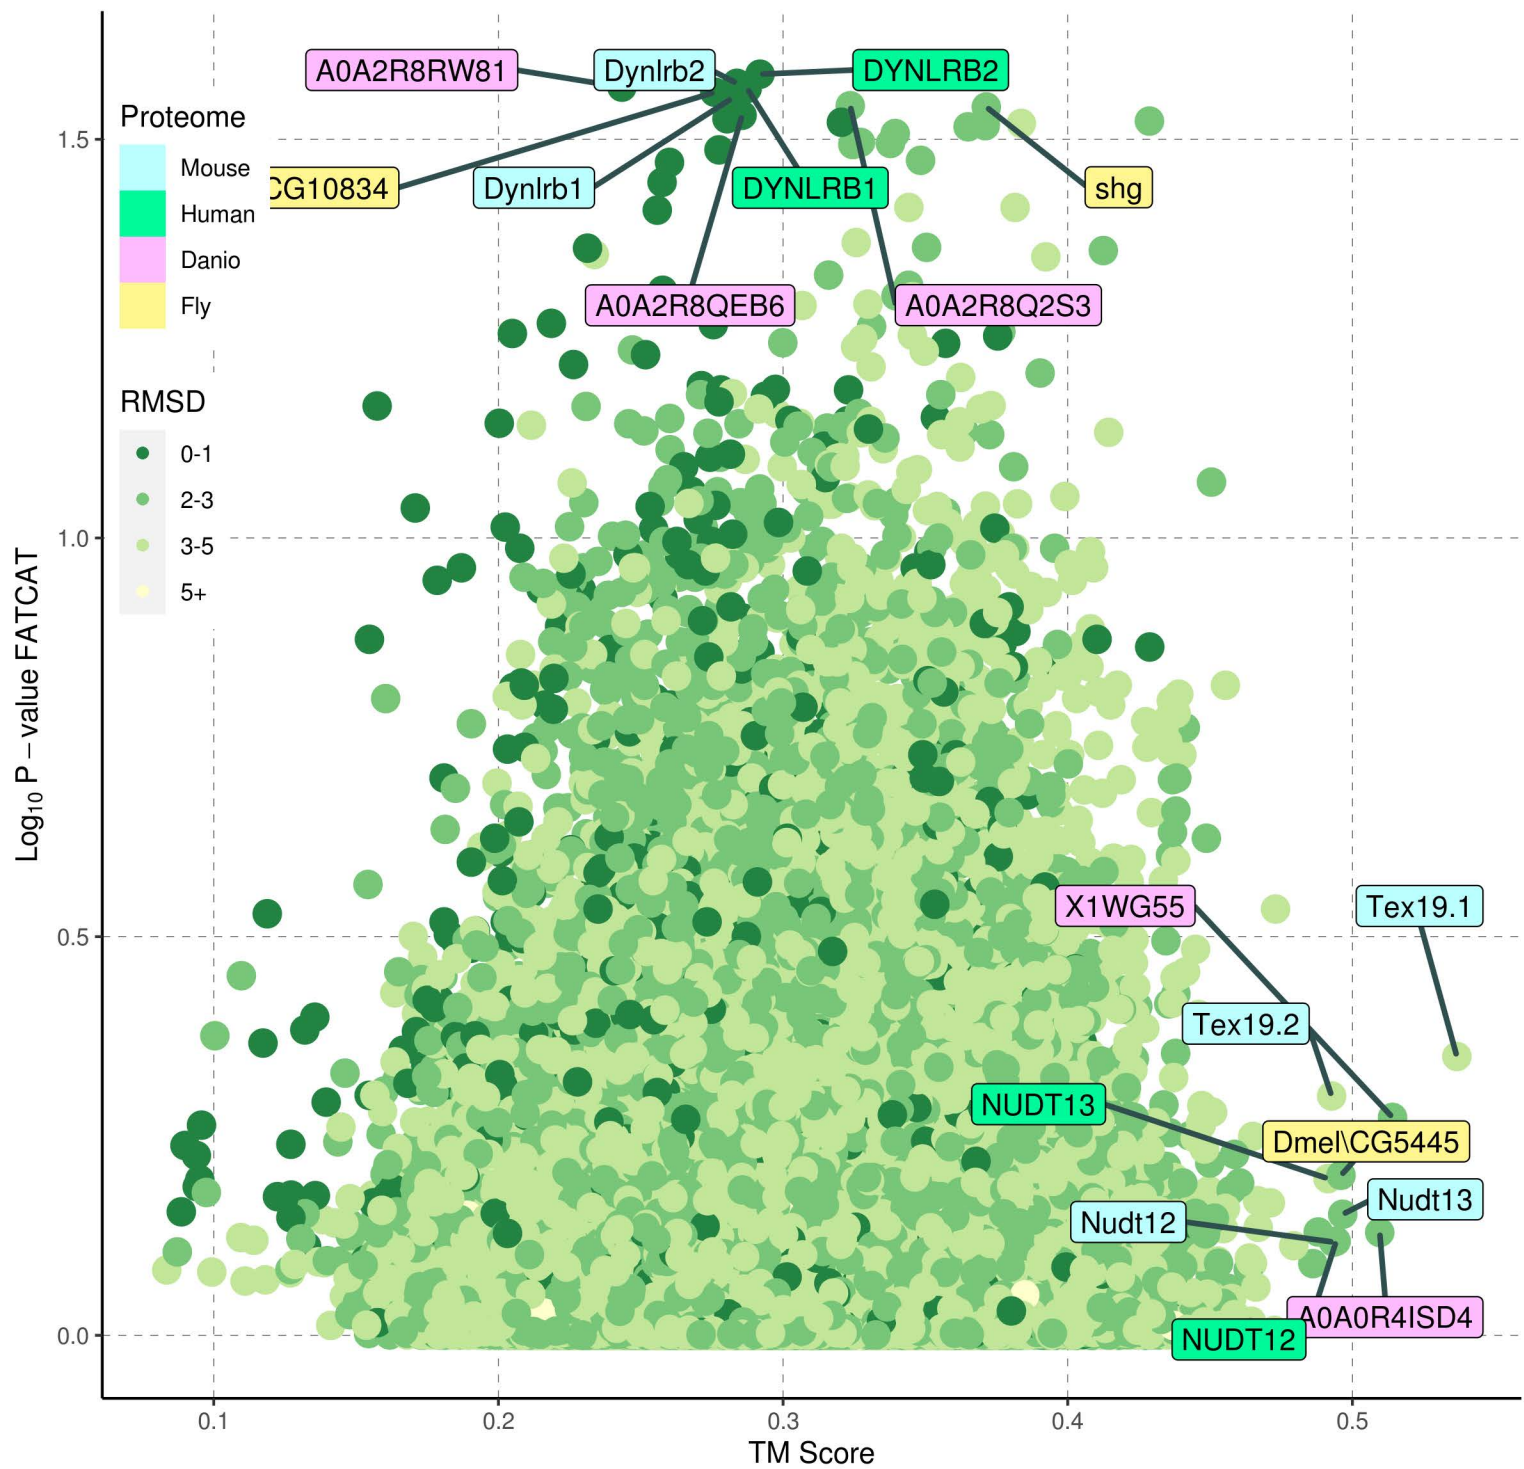

AorfG : No hits, top-scoring values are indicated

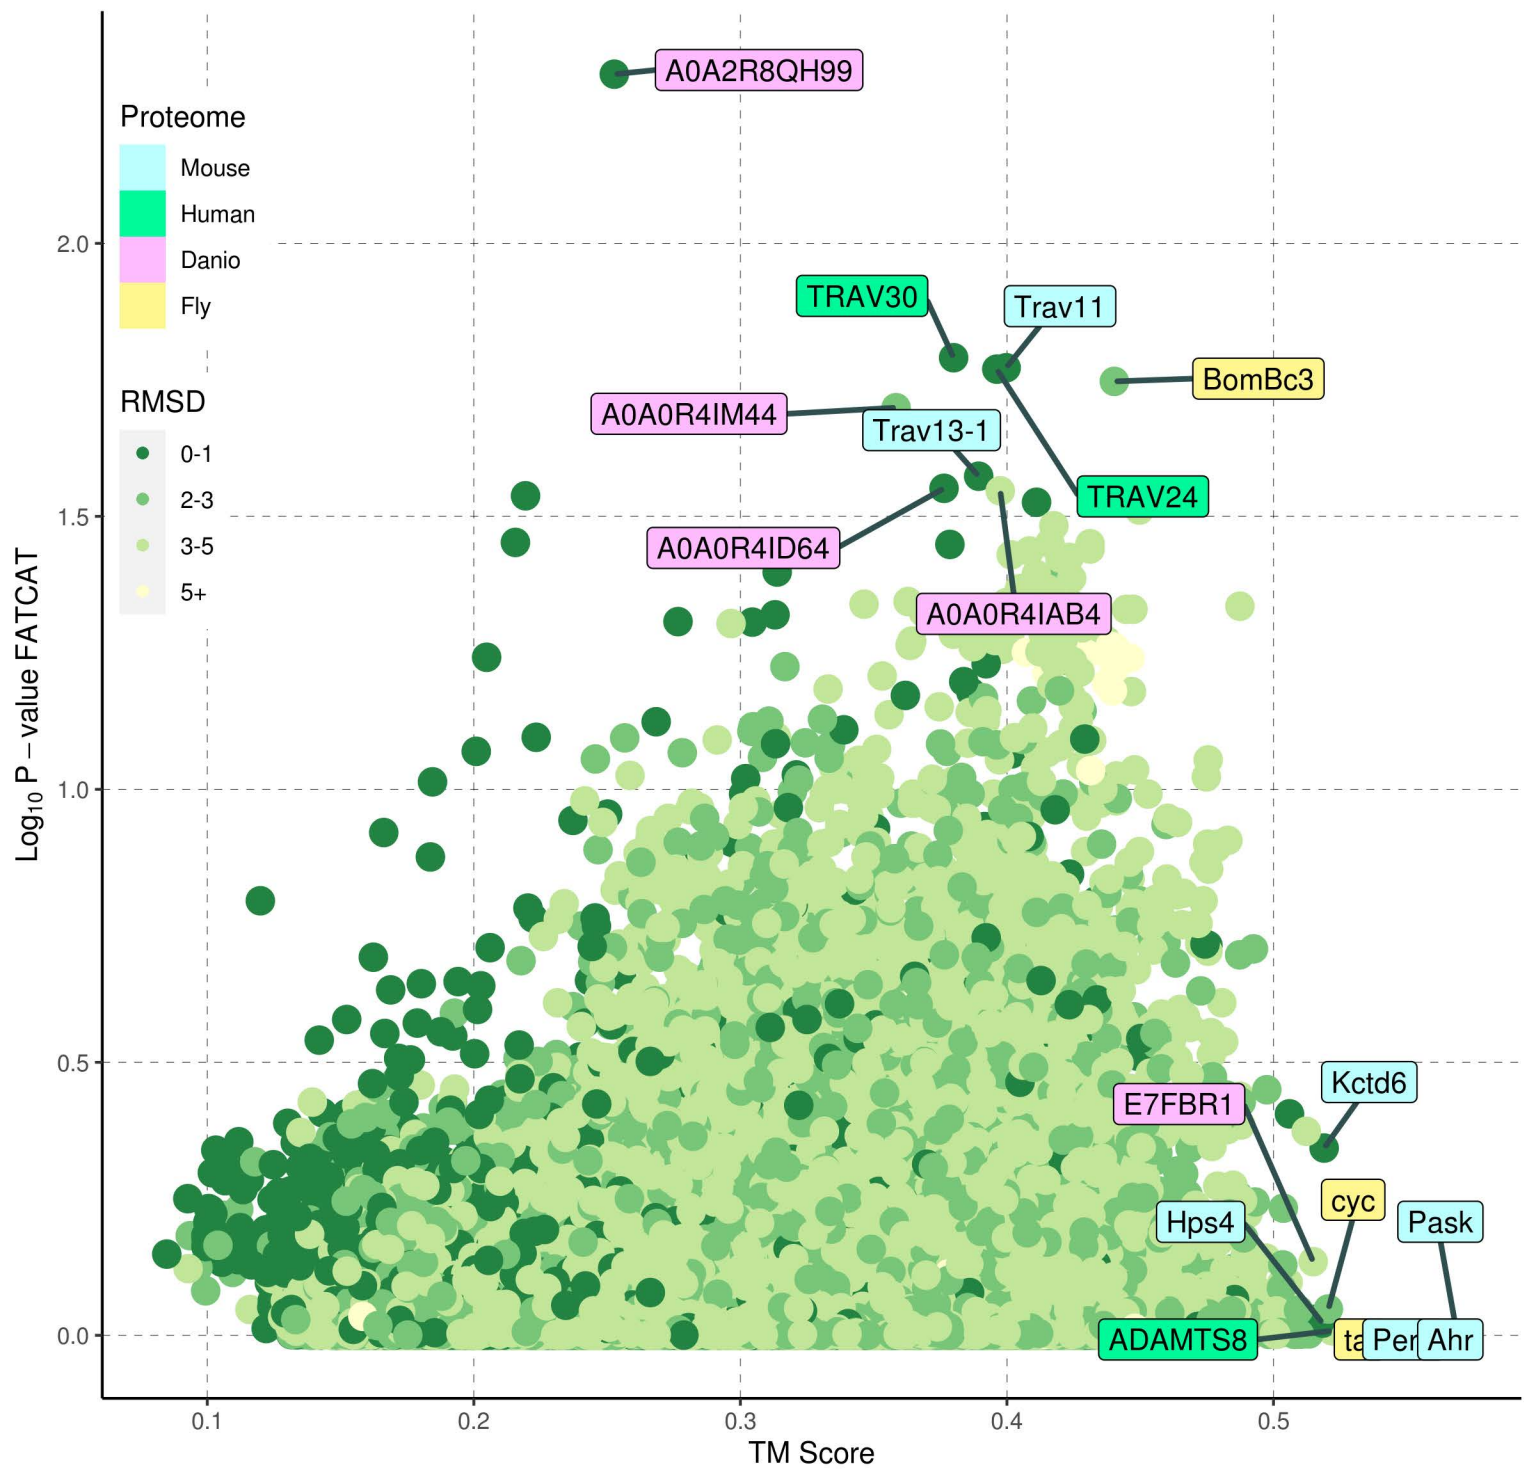

AorfH : No hits, top-scoring values are indicated

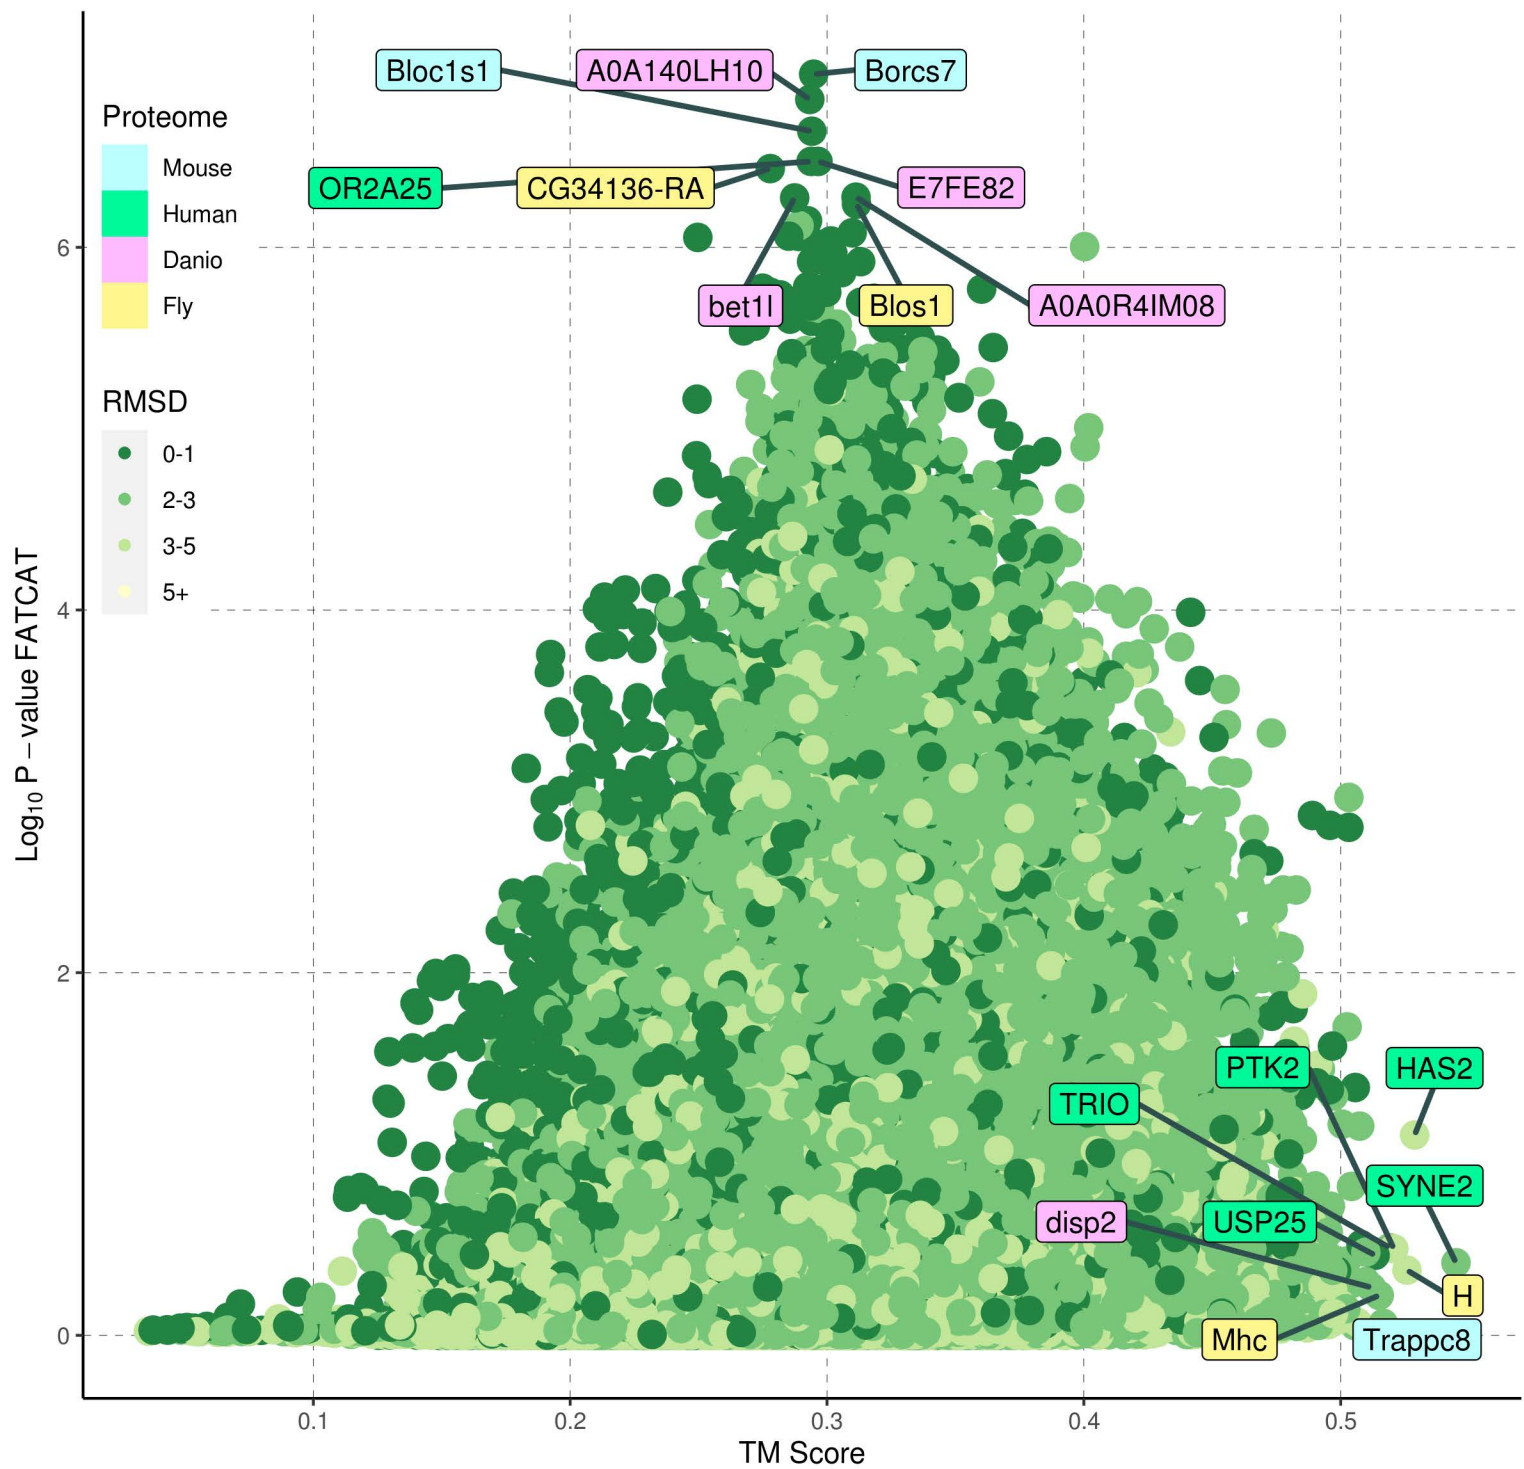





# AorfJ : No hits, top-scoring values are indicated

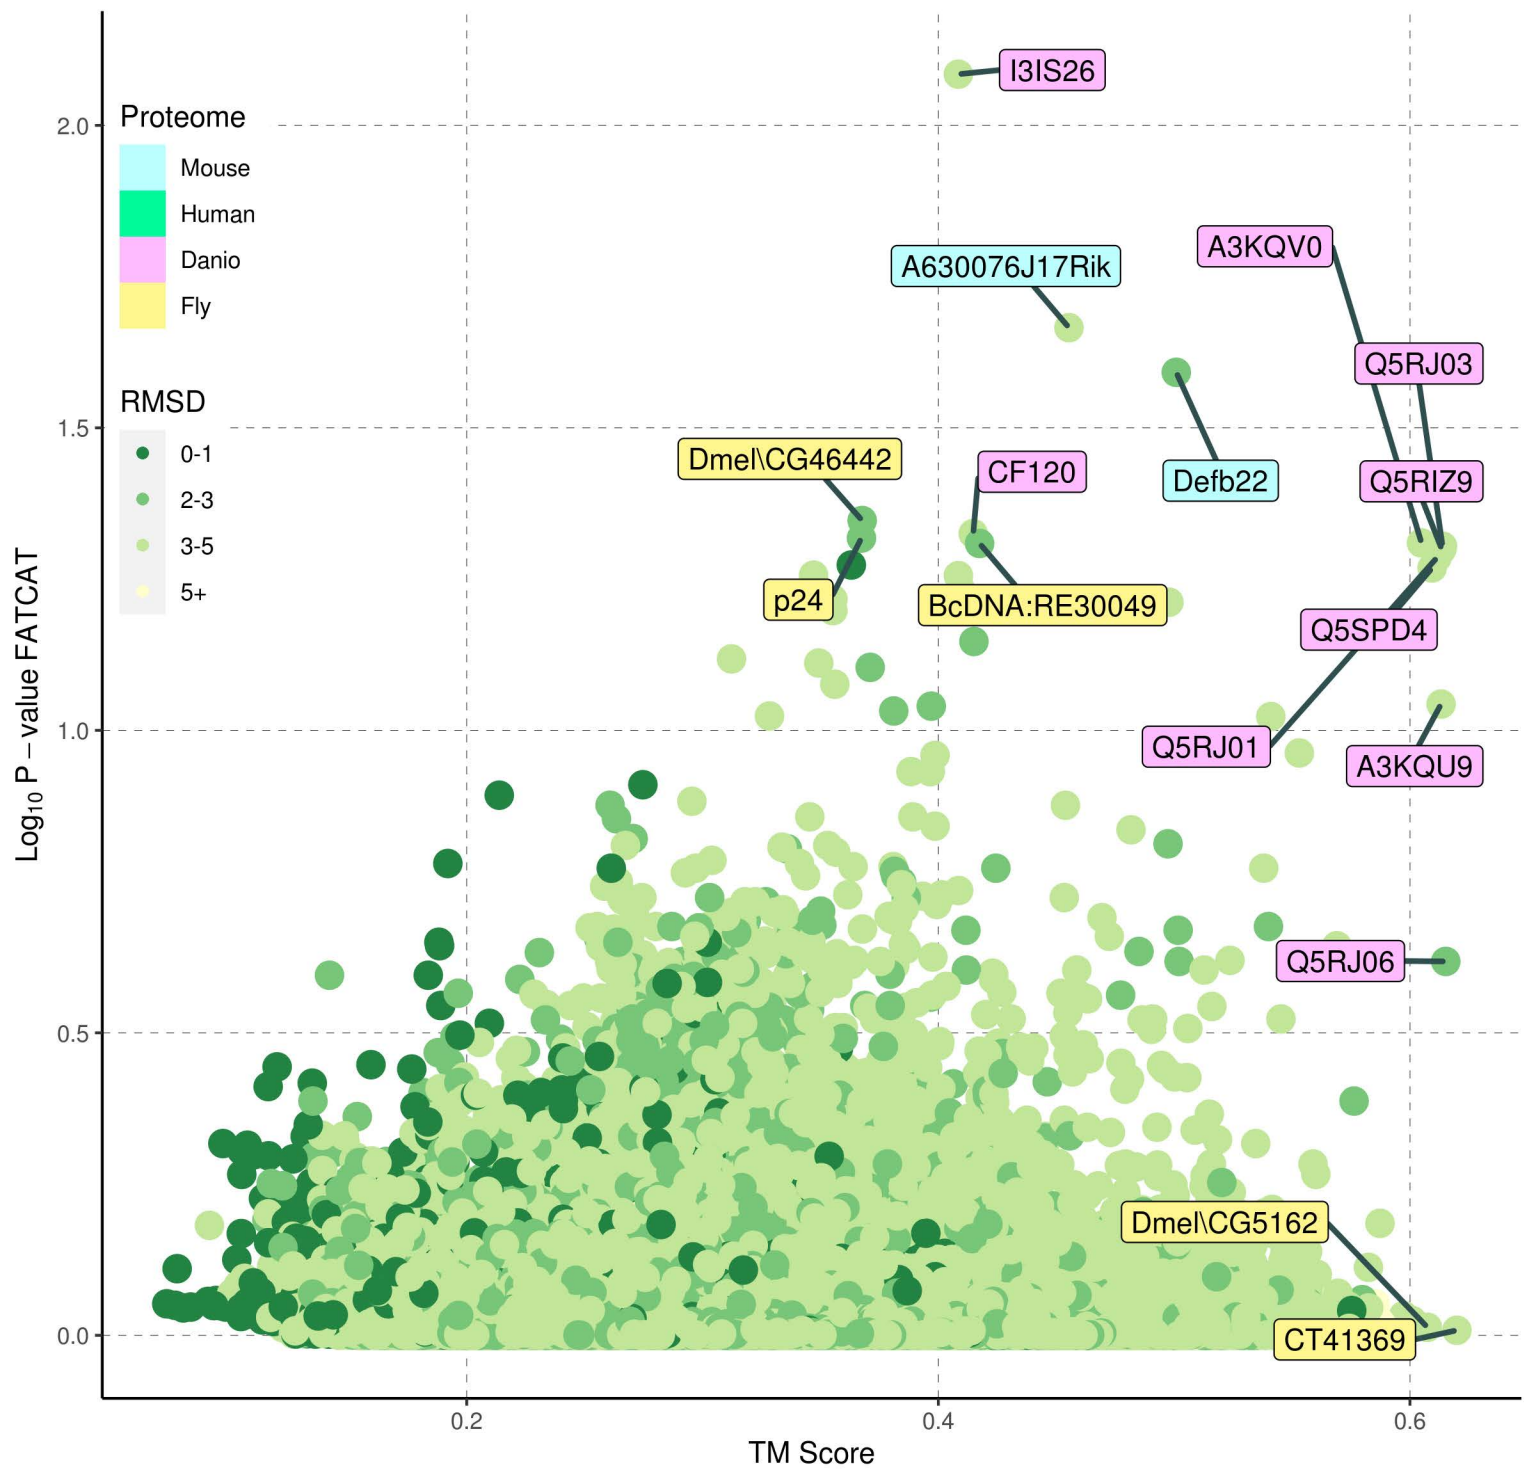

AorfK : No hits, top-scoring values are indicated

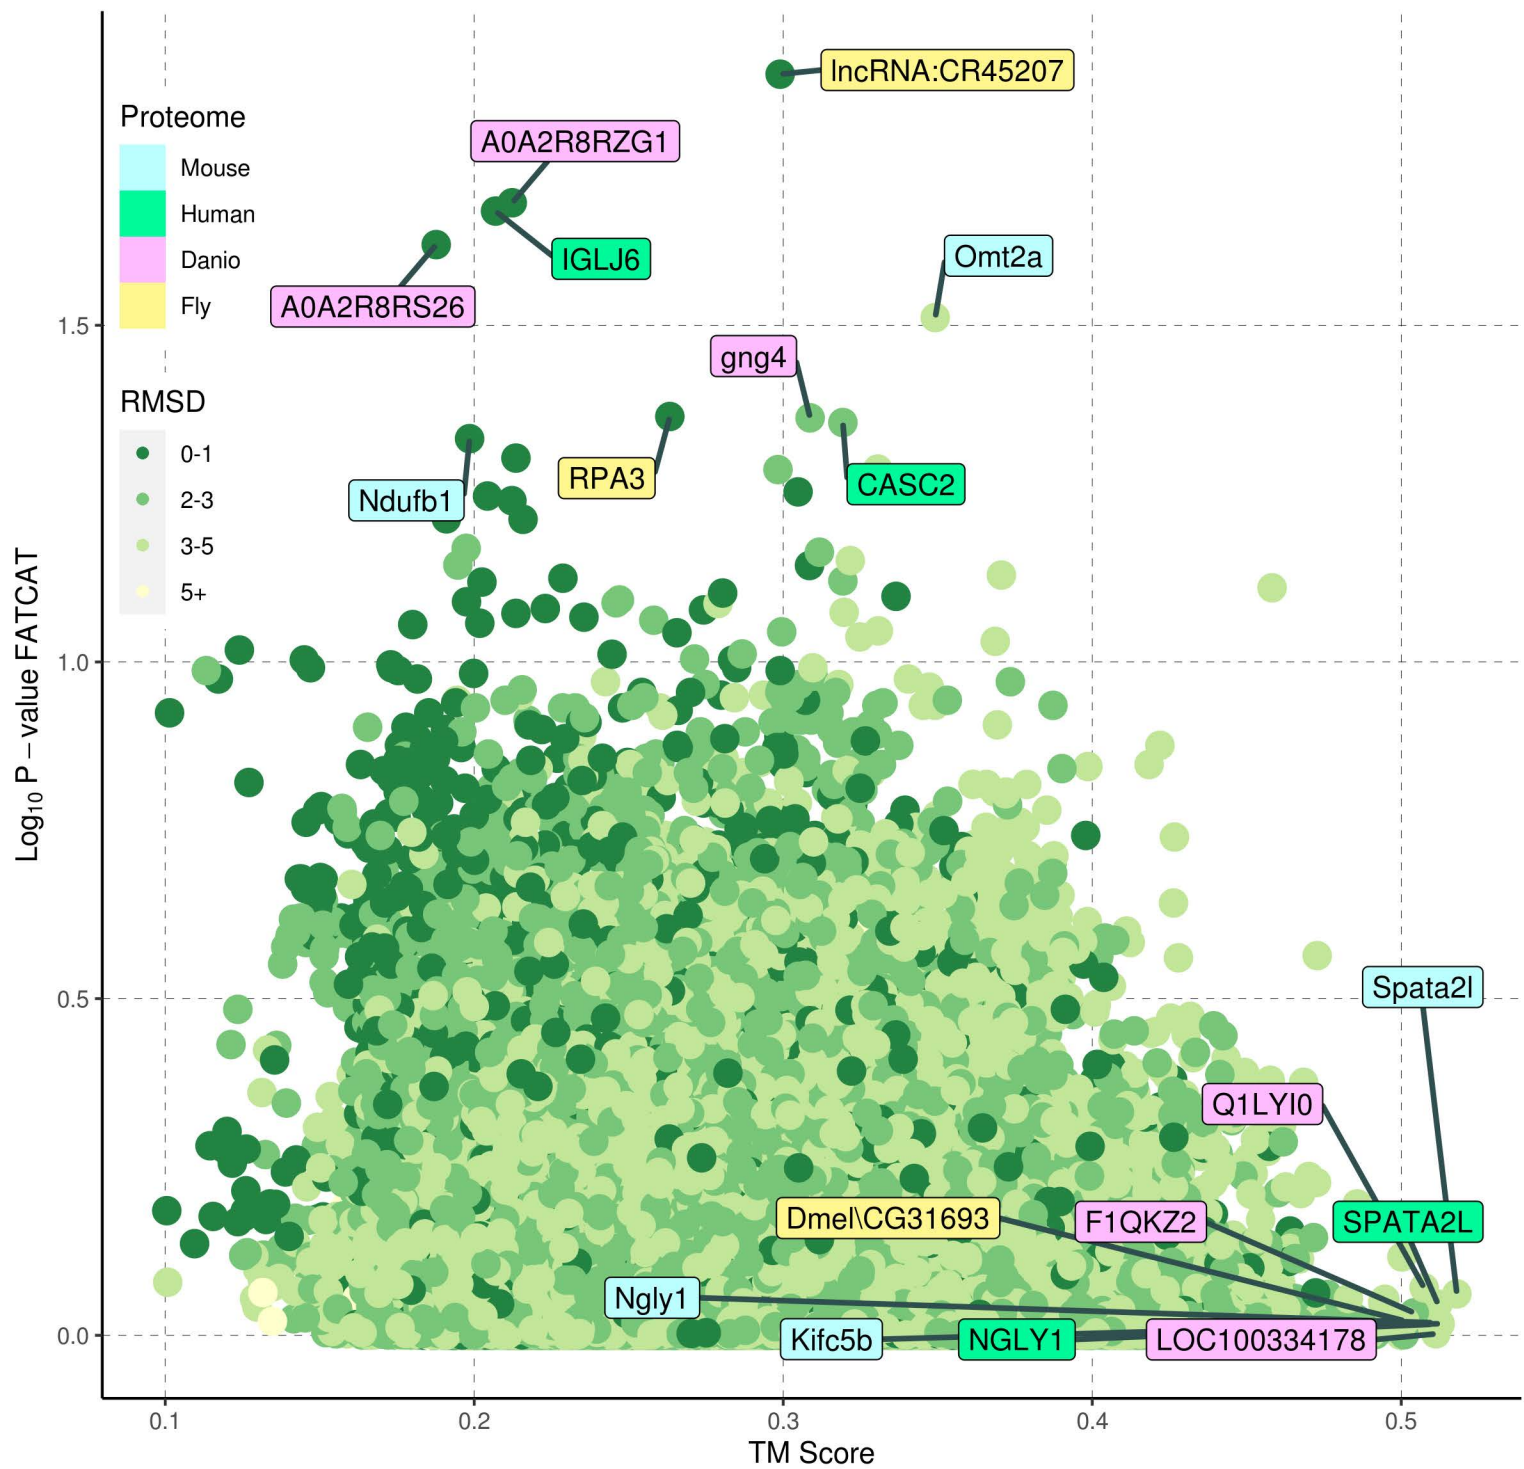

## AorfL

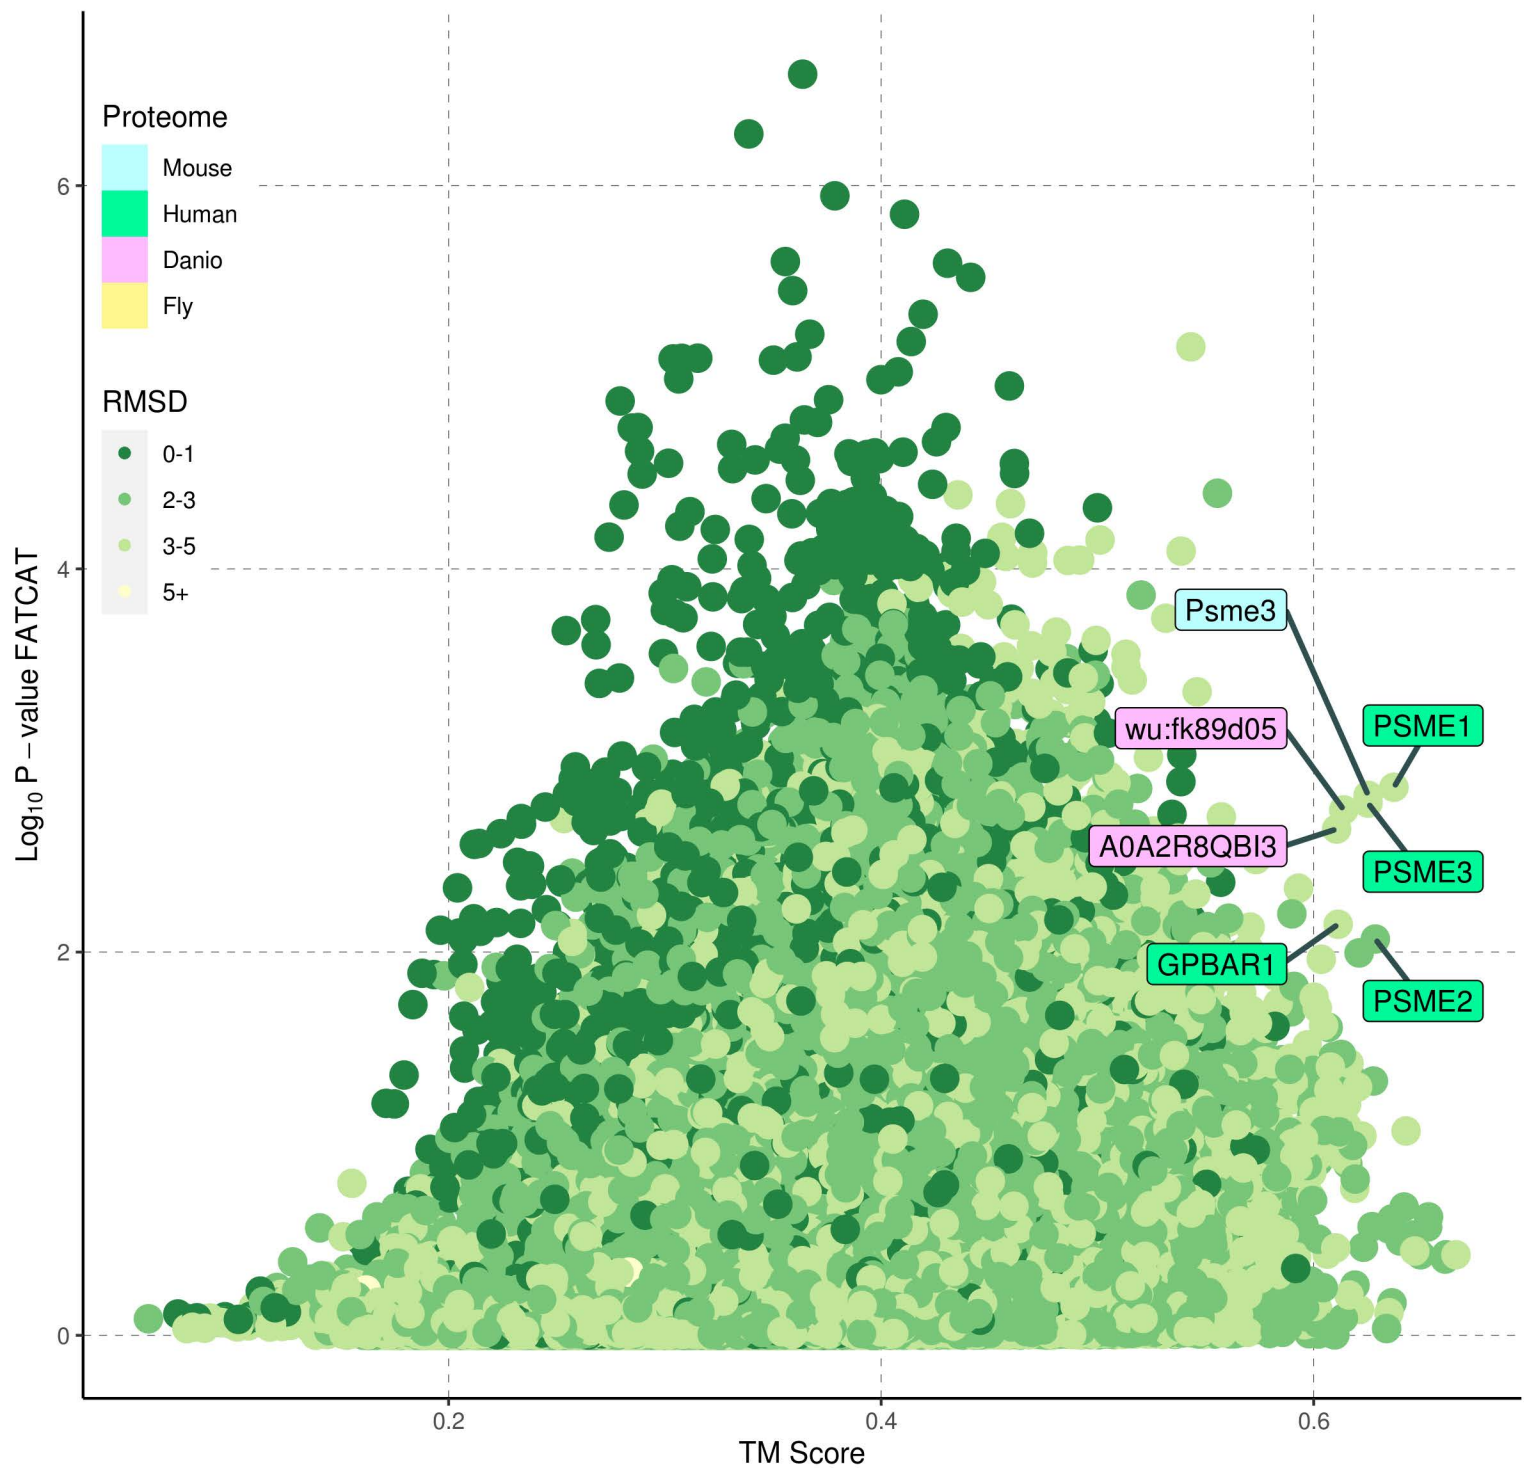



## AorfN

Log<sub>10</sub> P -value FATCAT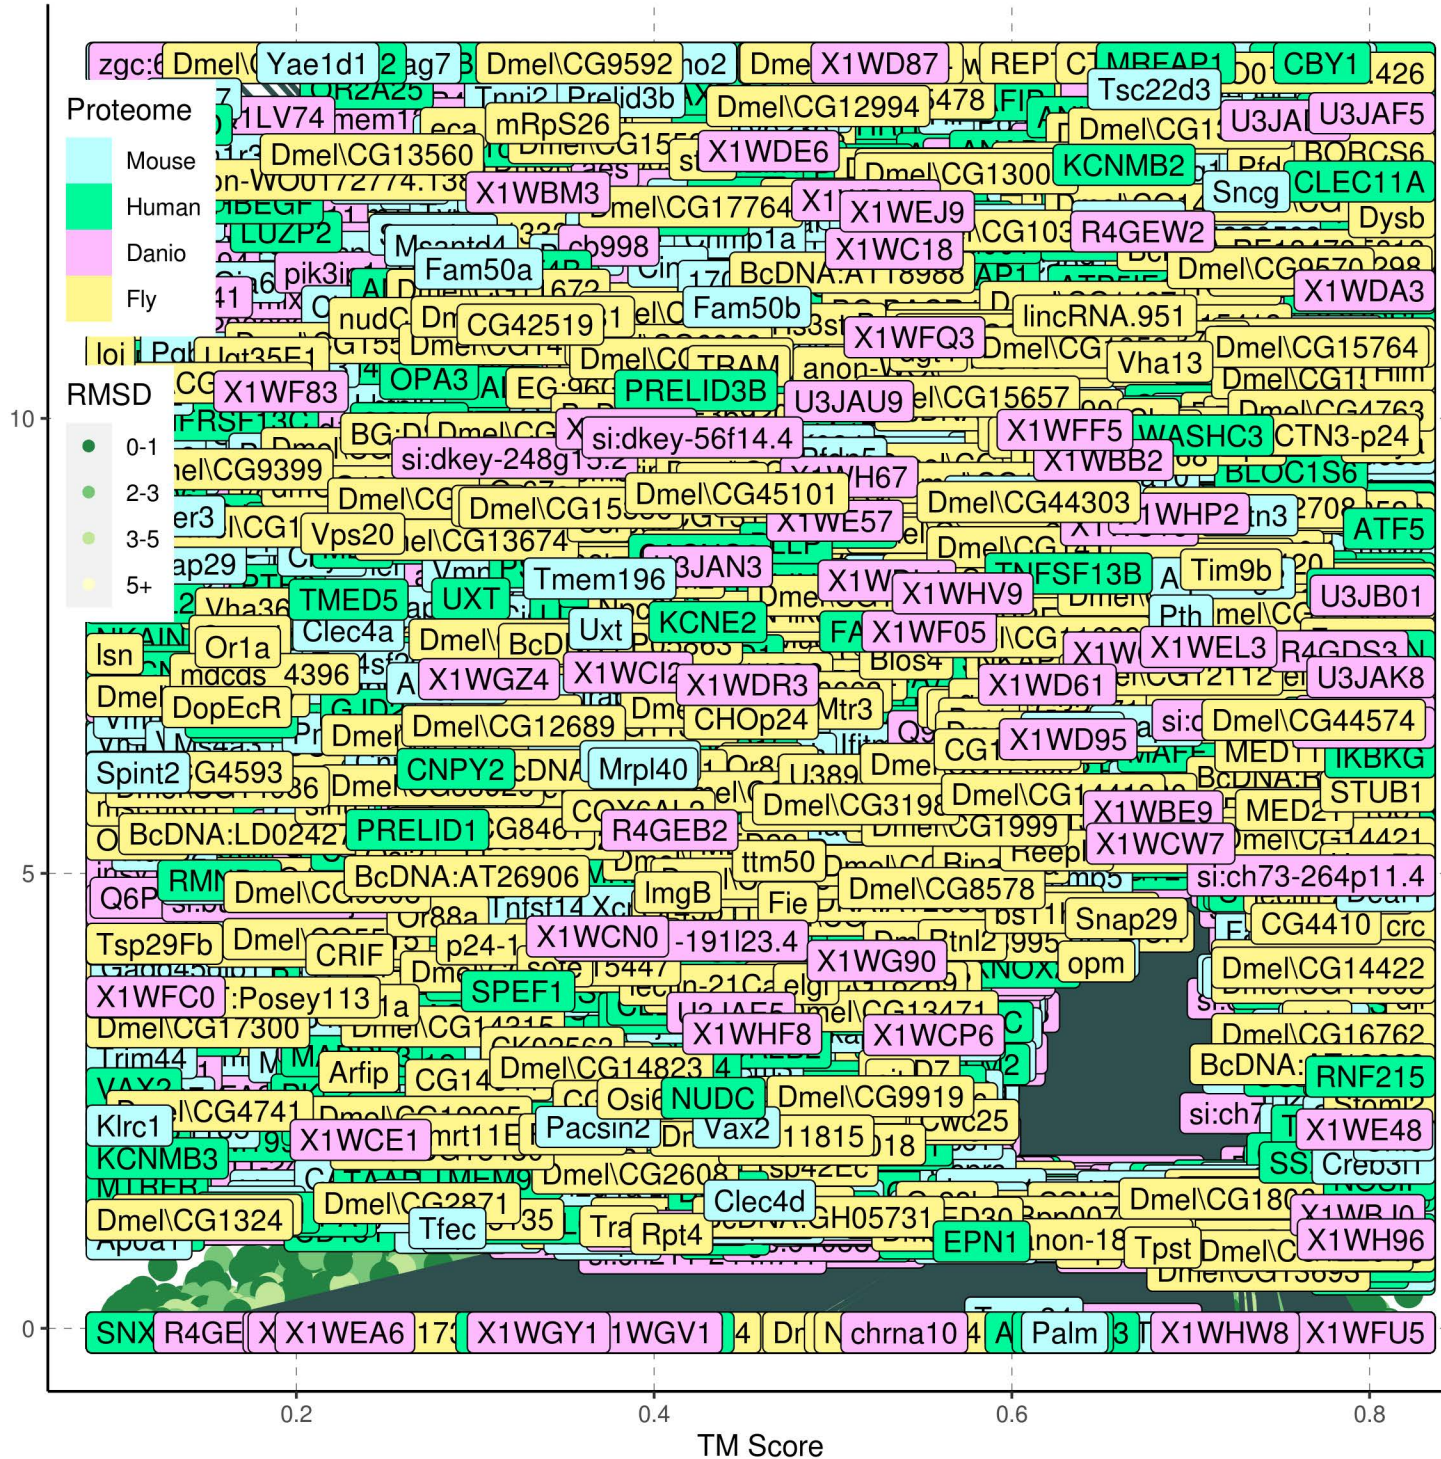

AorfO : No hits, top-scoring values are indicated

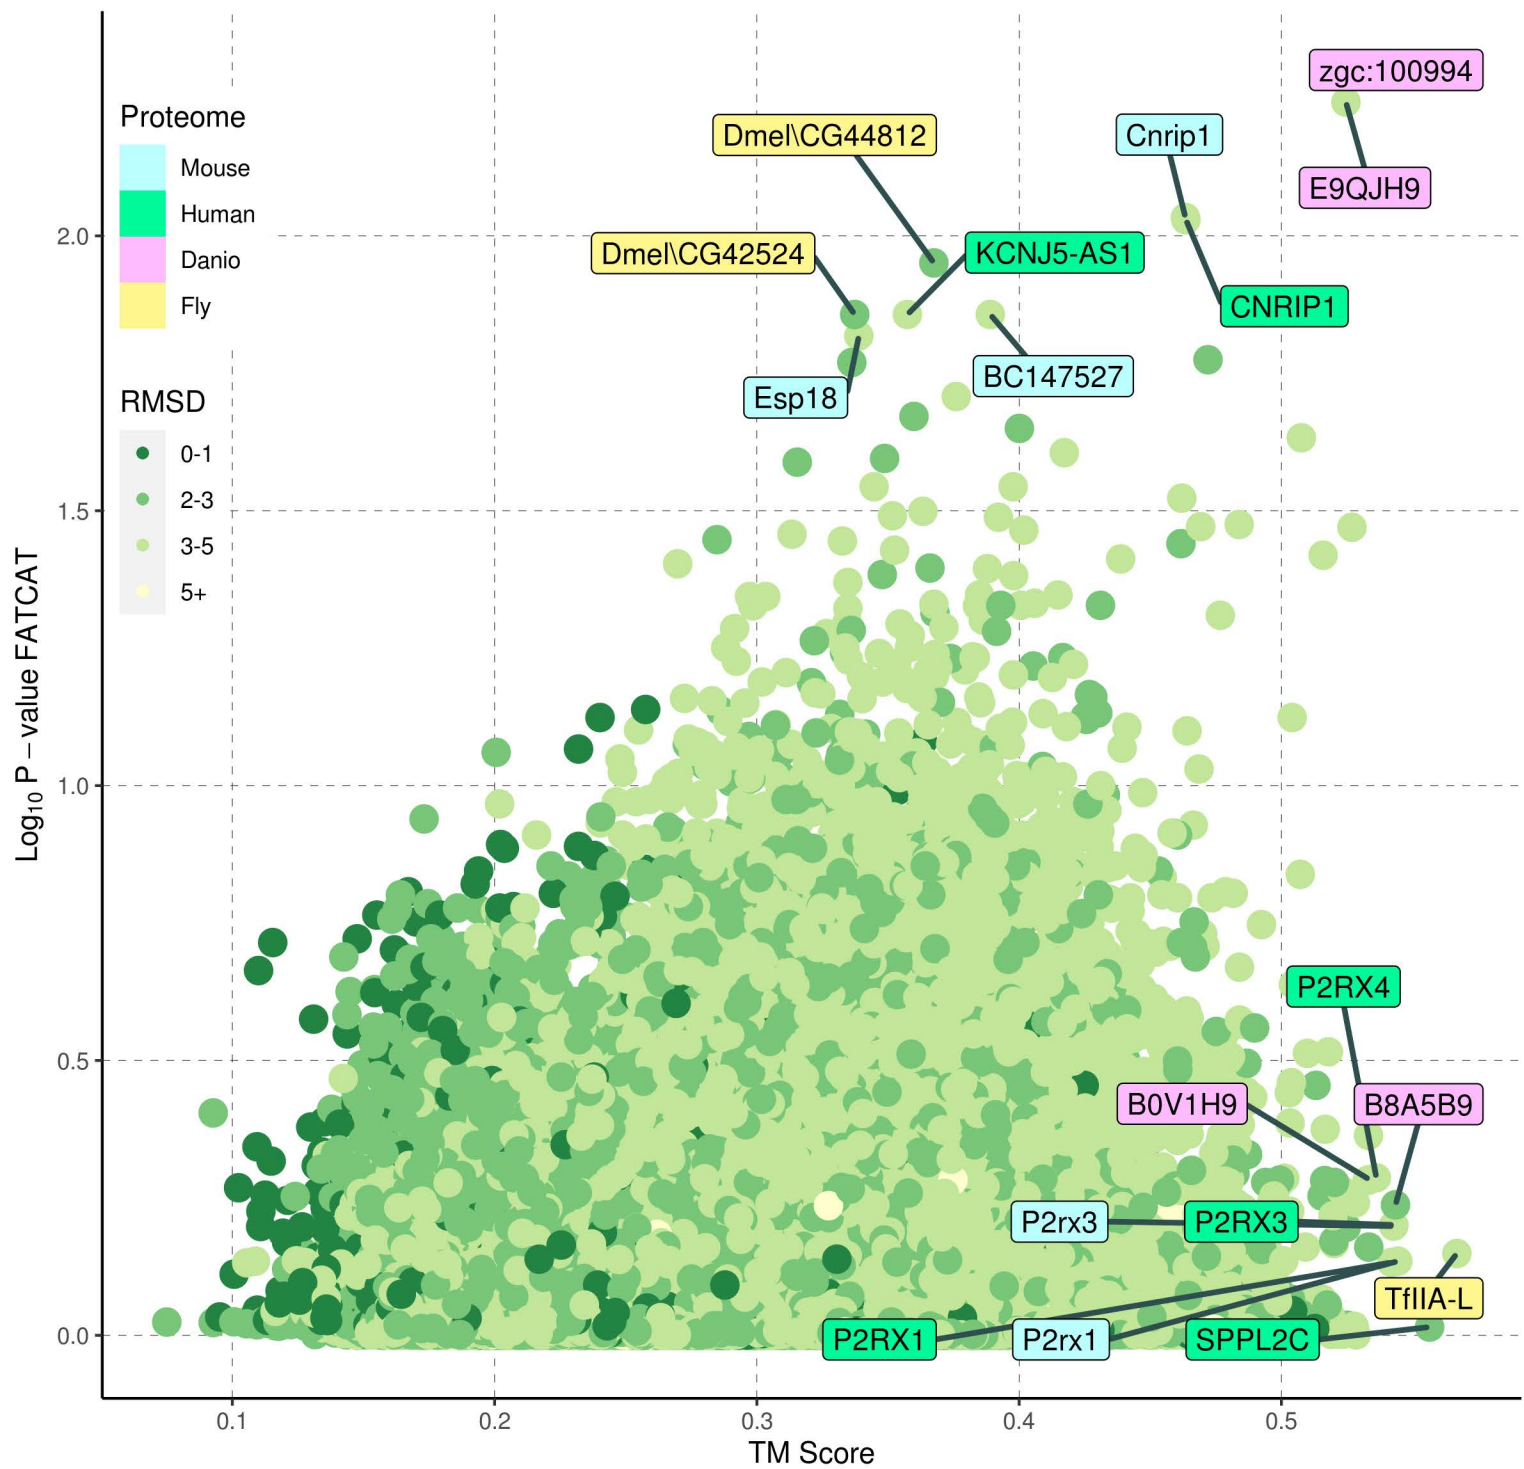

# AorfP : No hits, top-scoring values are indicated

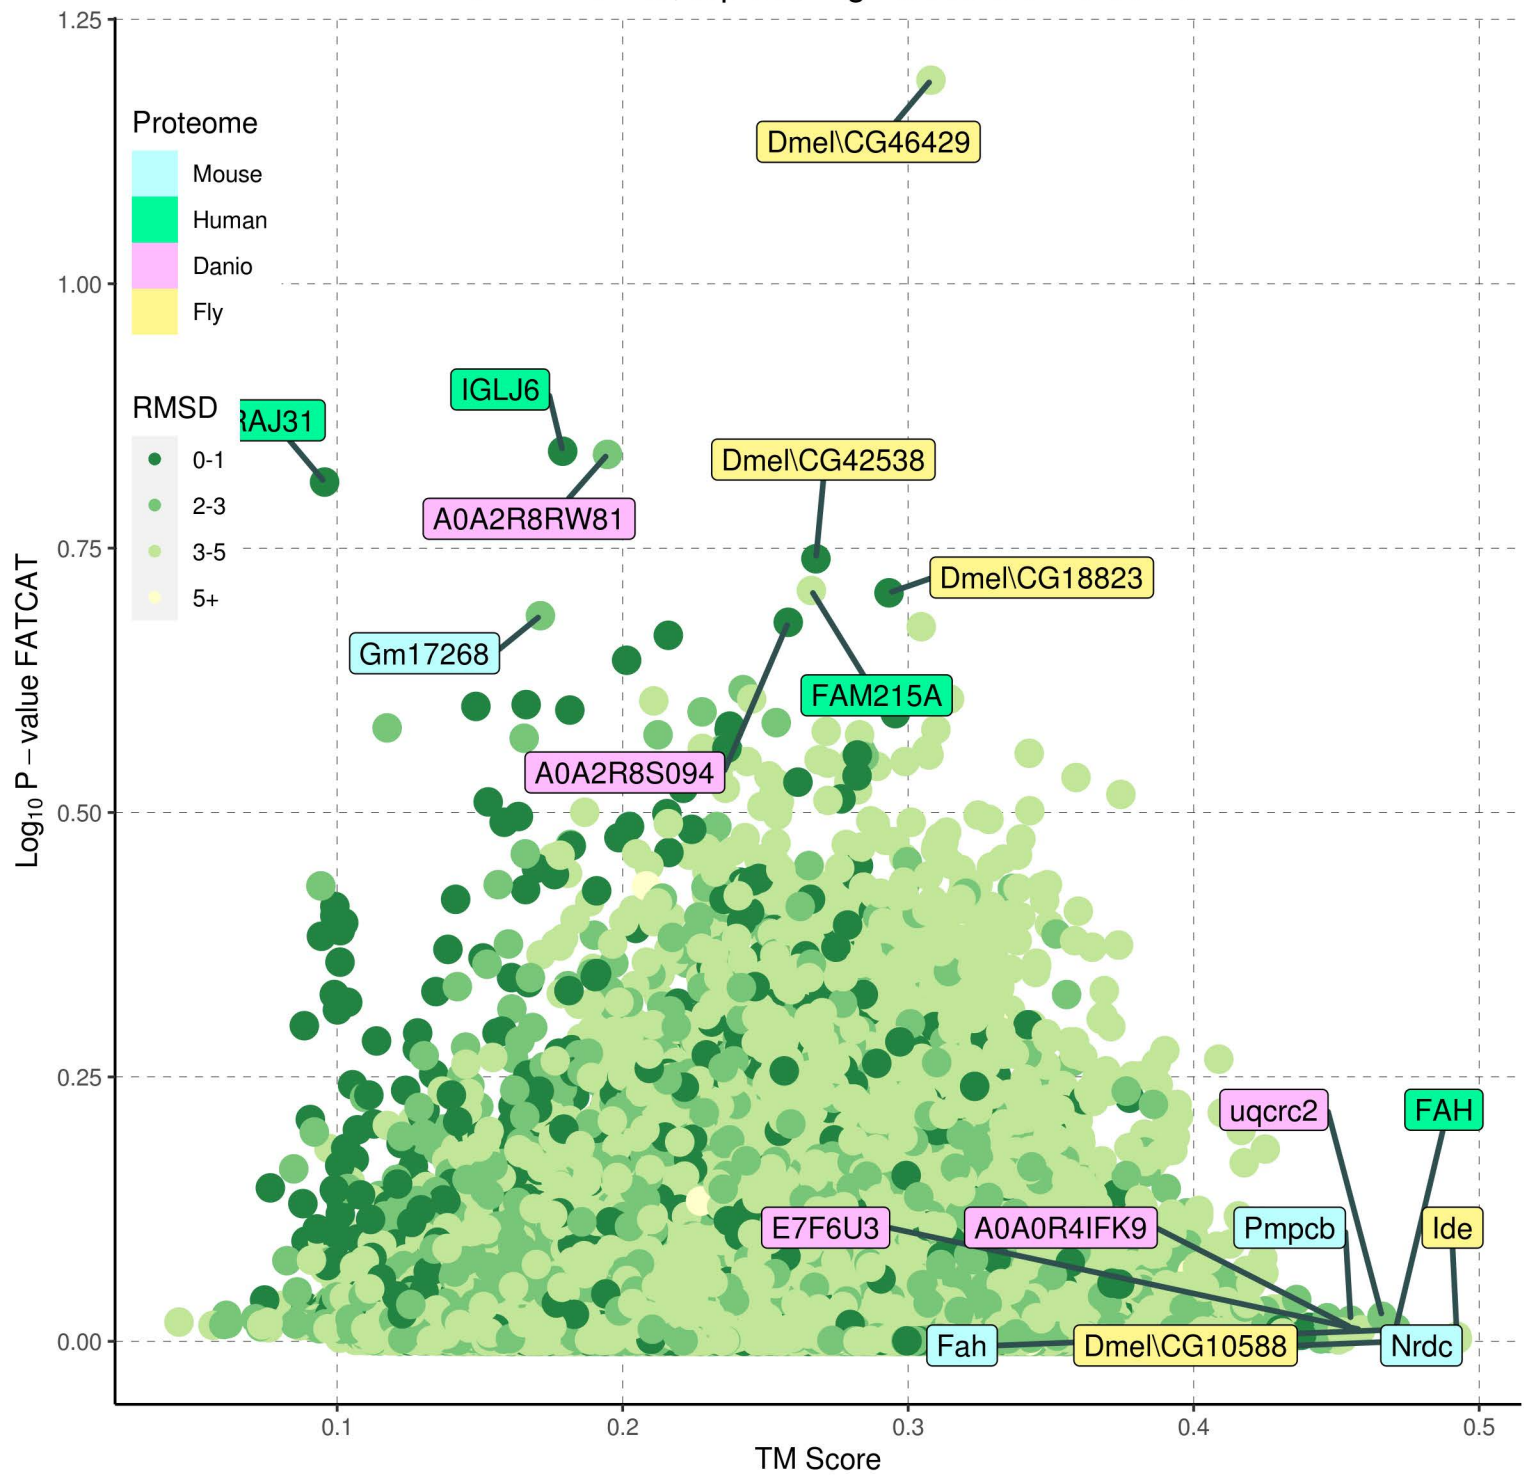

AorfQ : No hits, top-scoring values are indicated

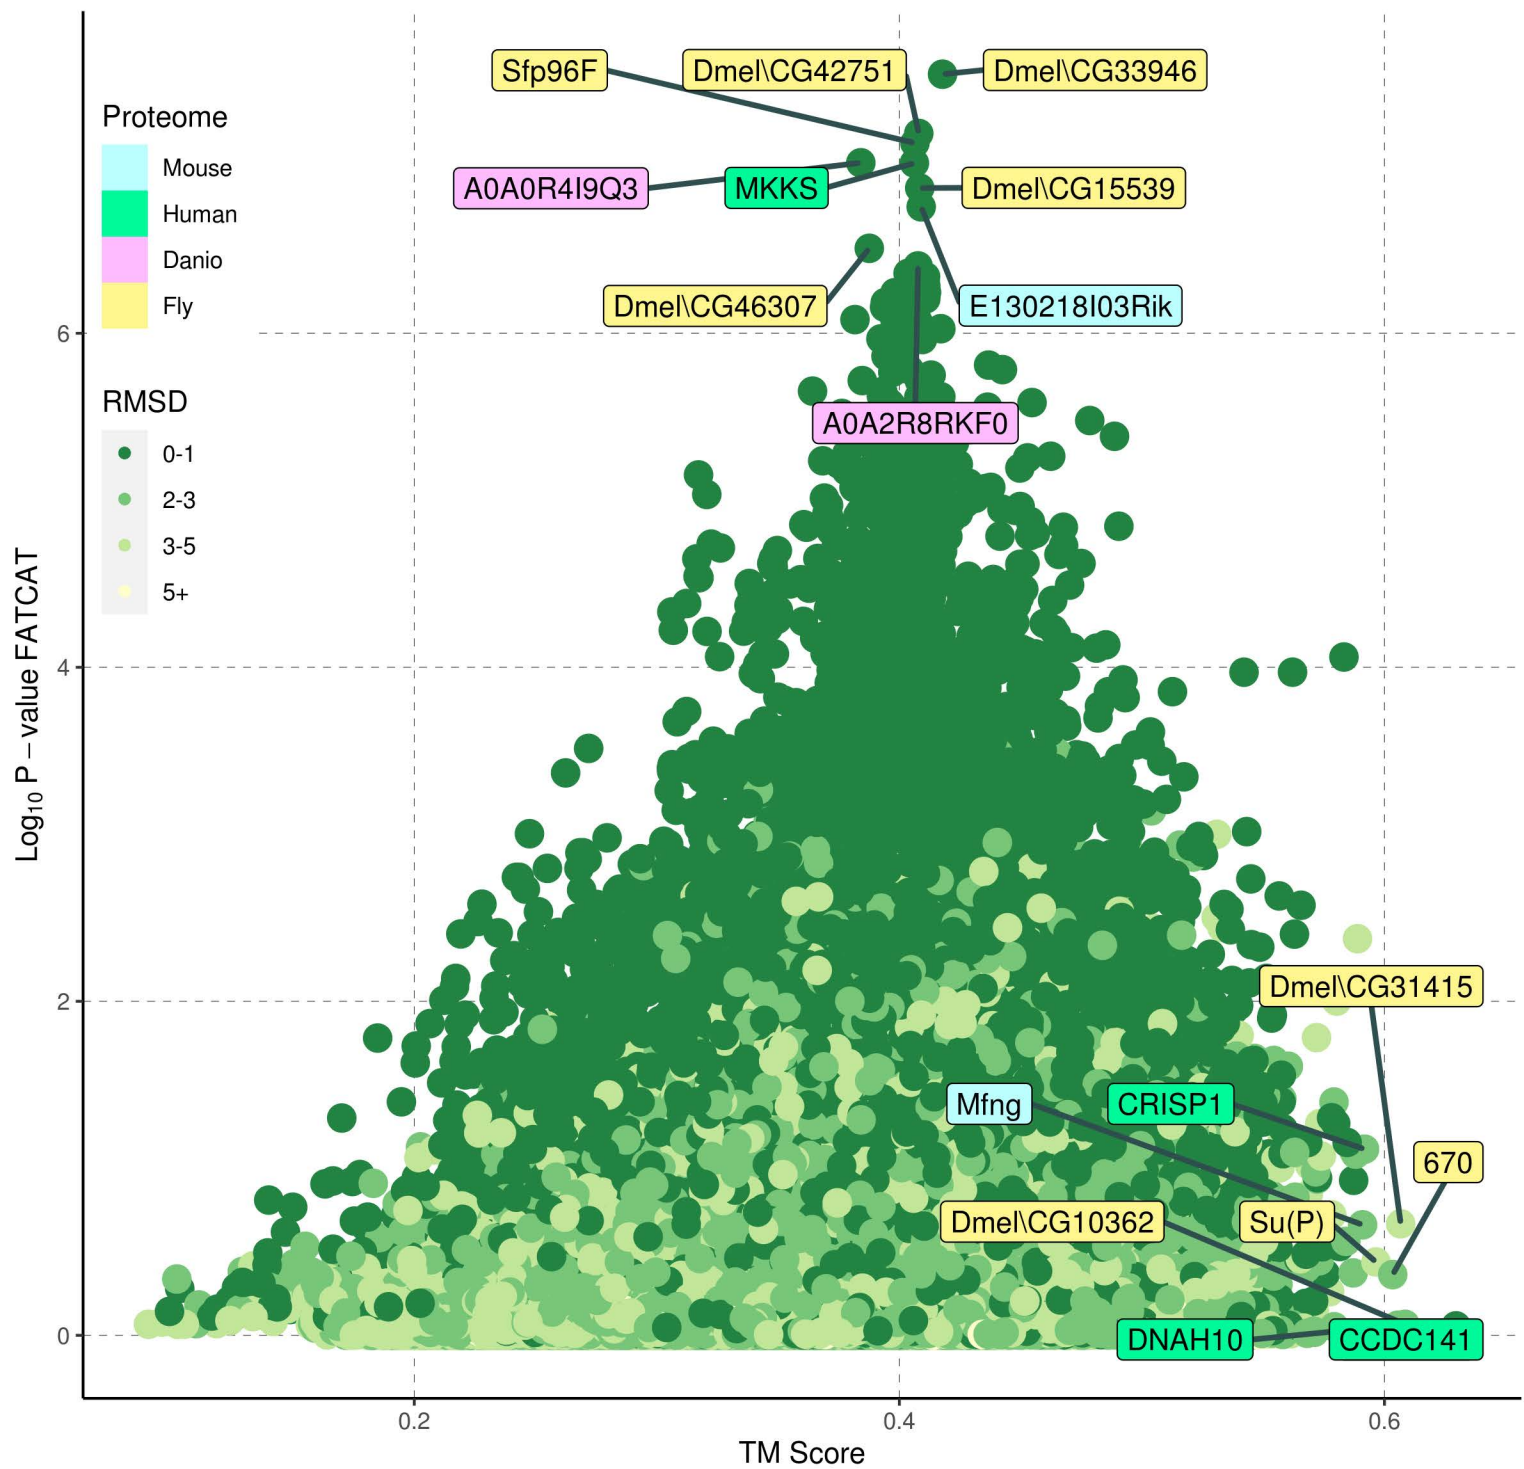



## AorR

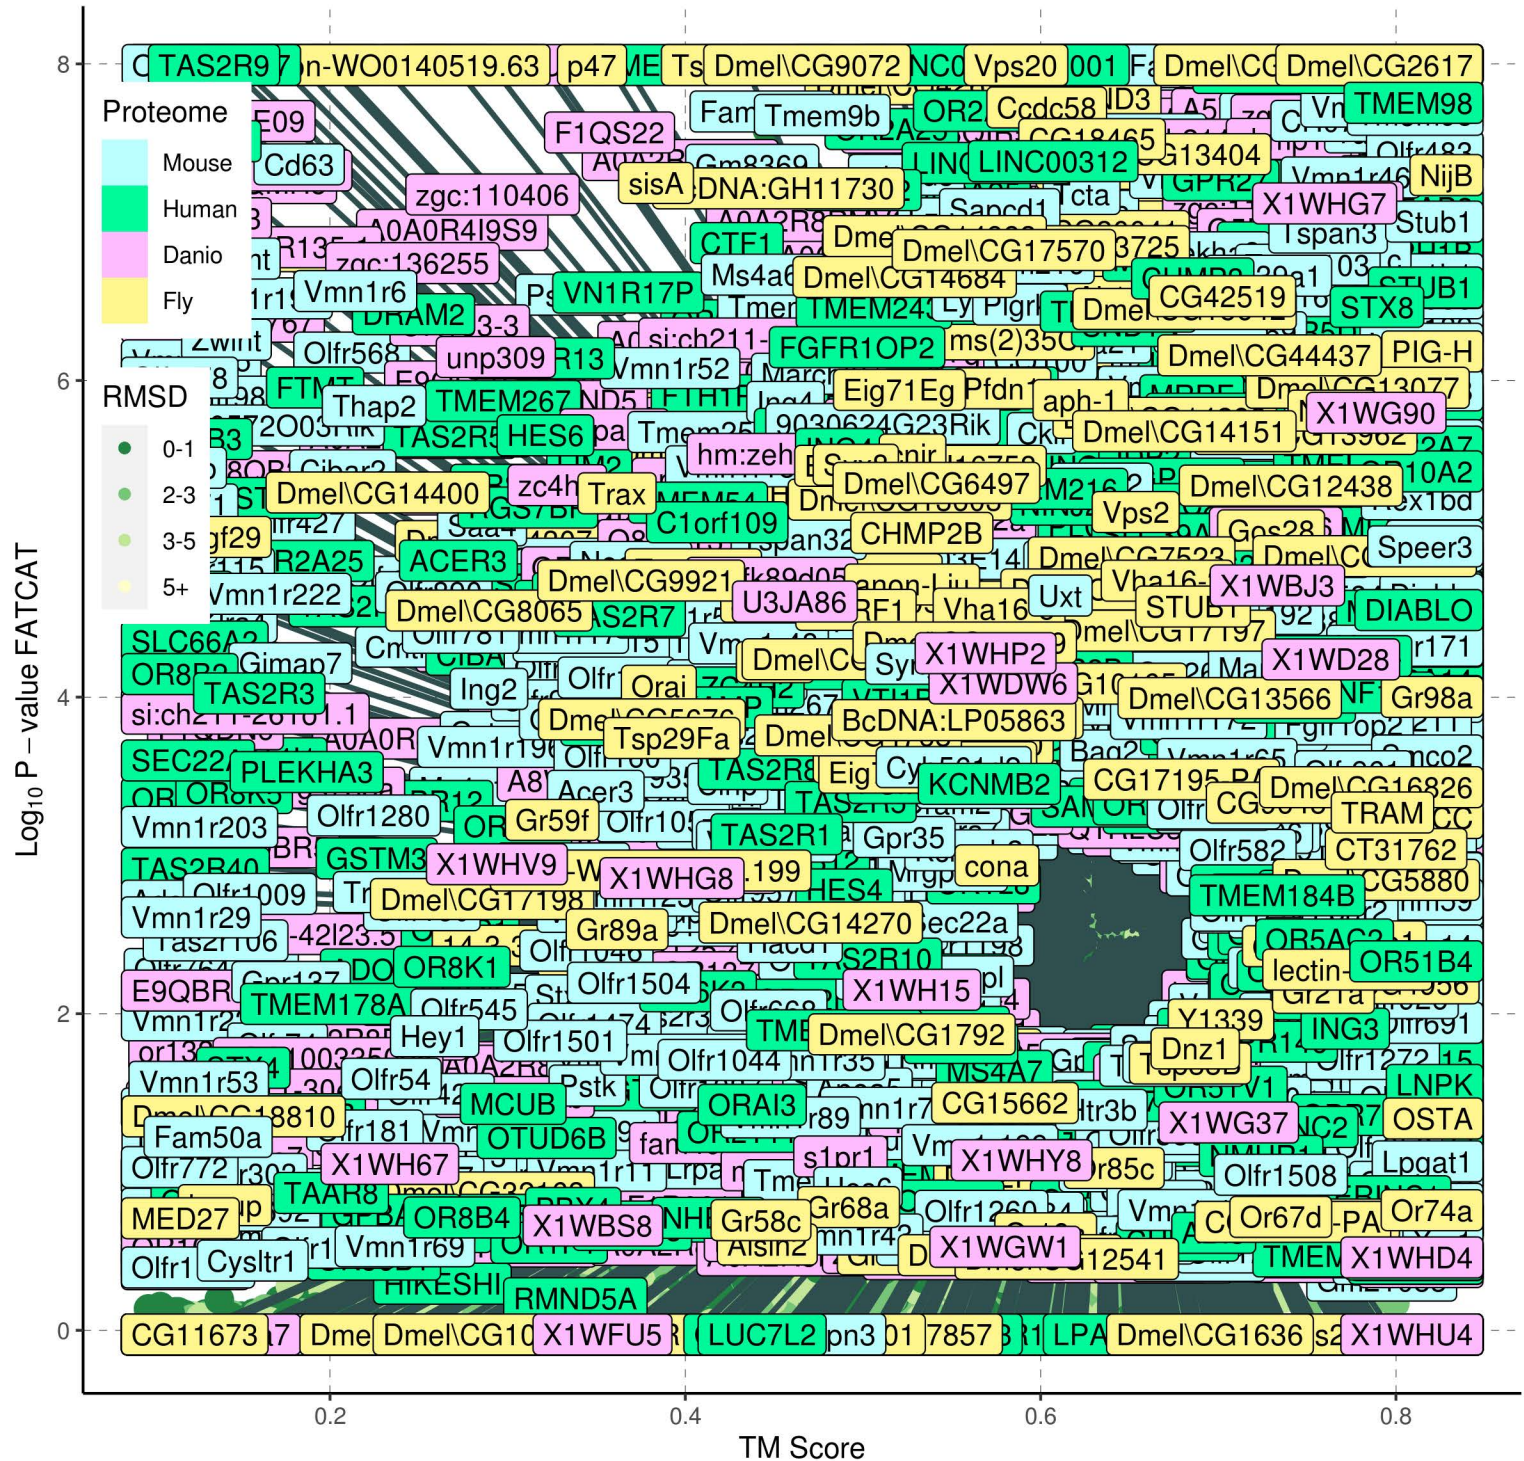

AorfS : No hits, top-scoring values are indicated

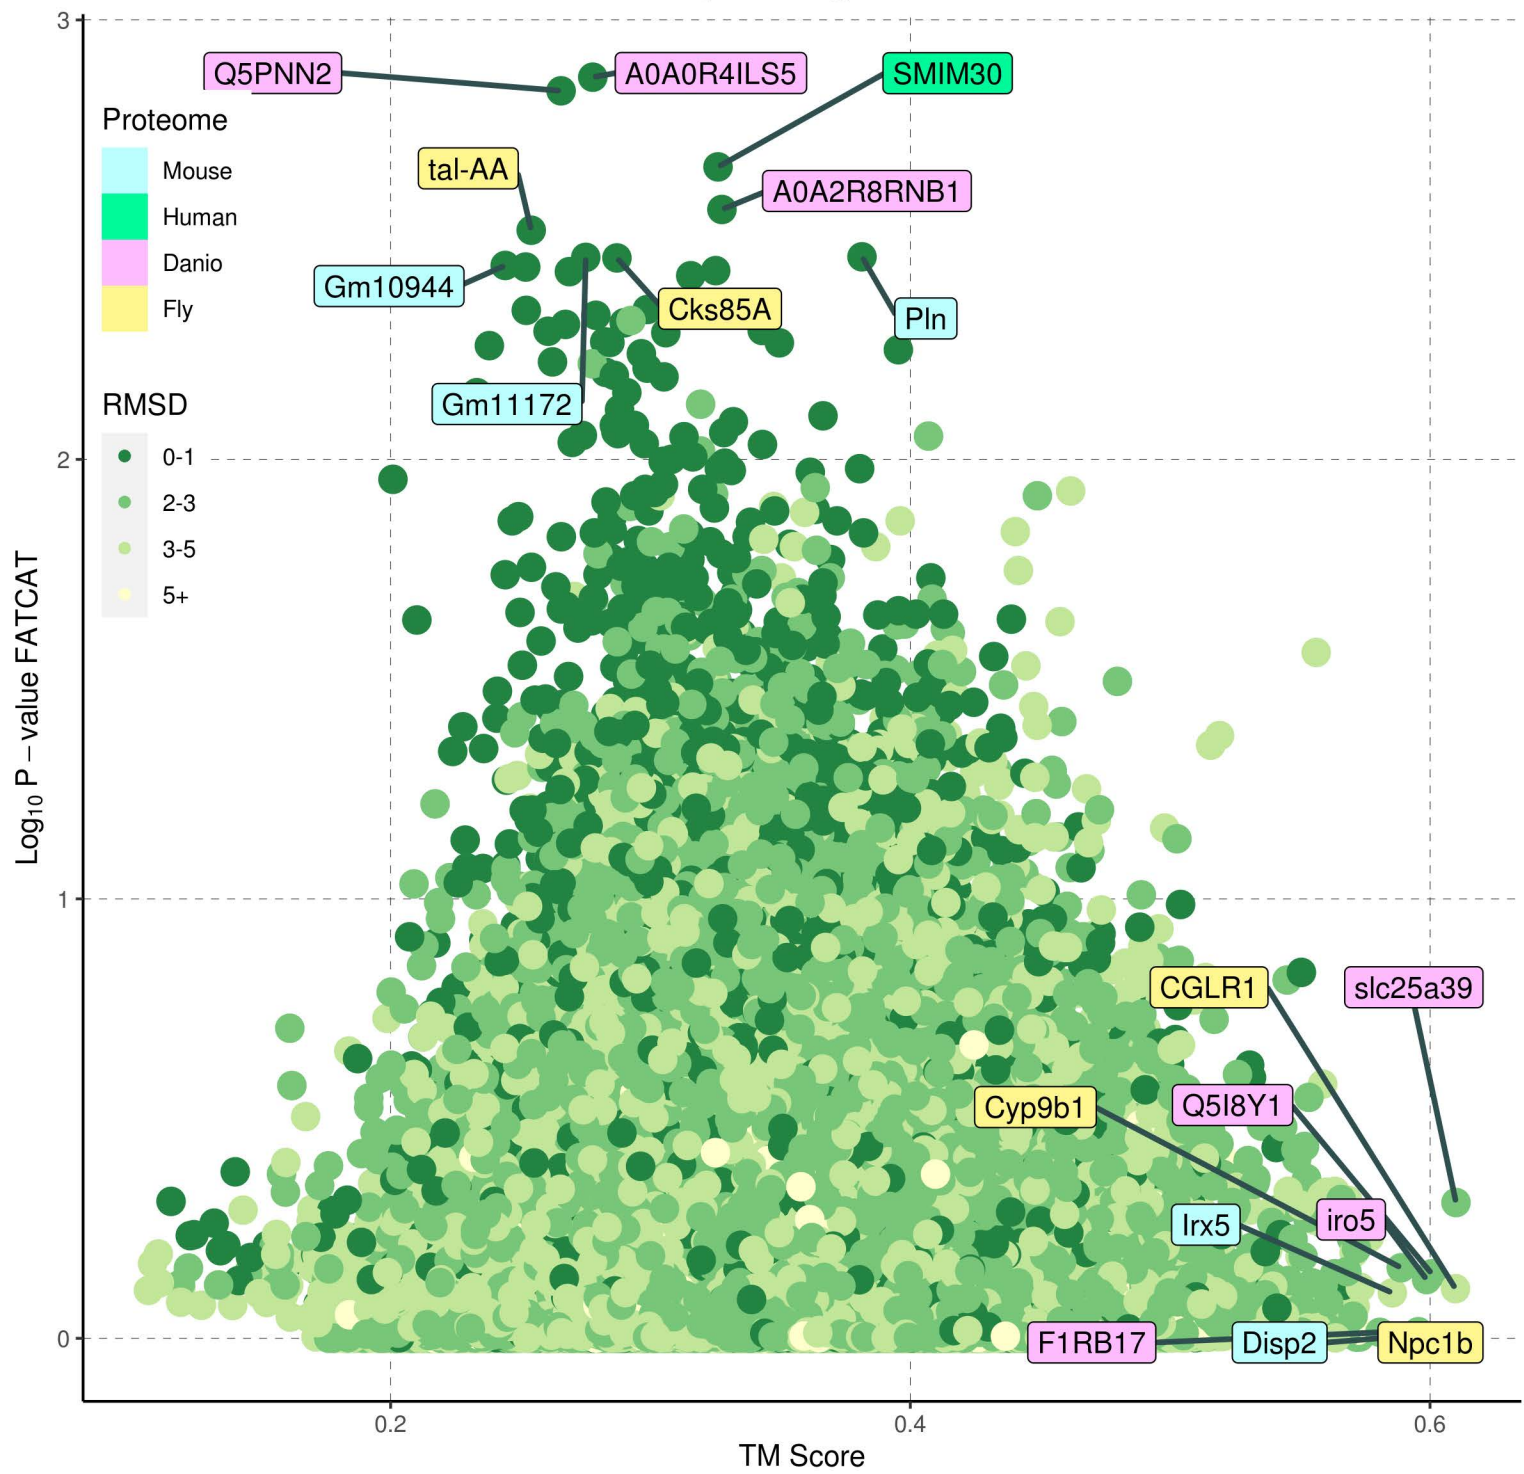

# AorfT : No hits, top-scoring values are indicated

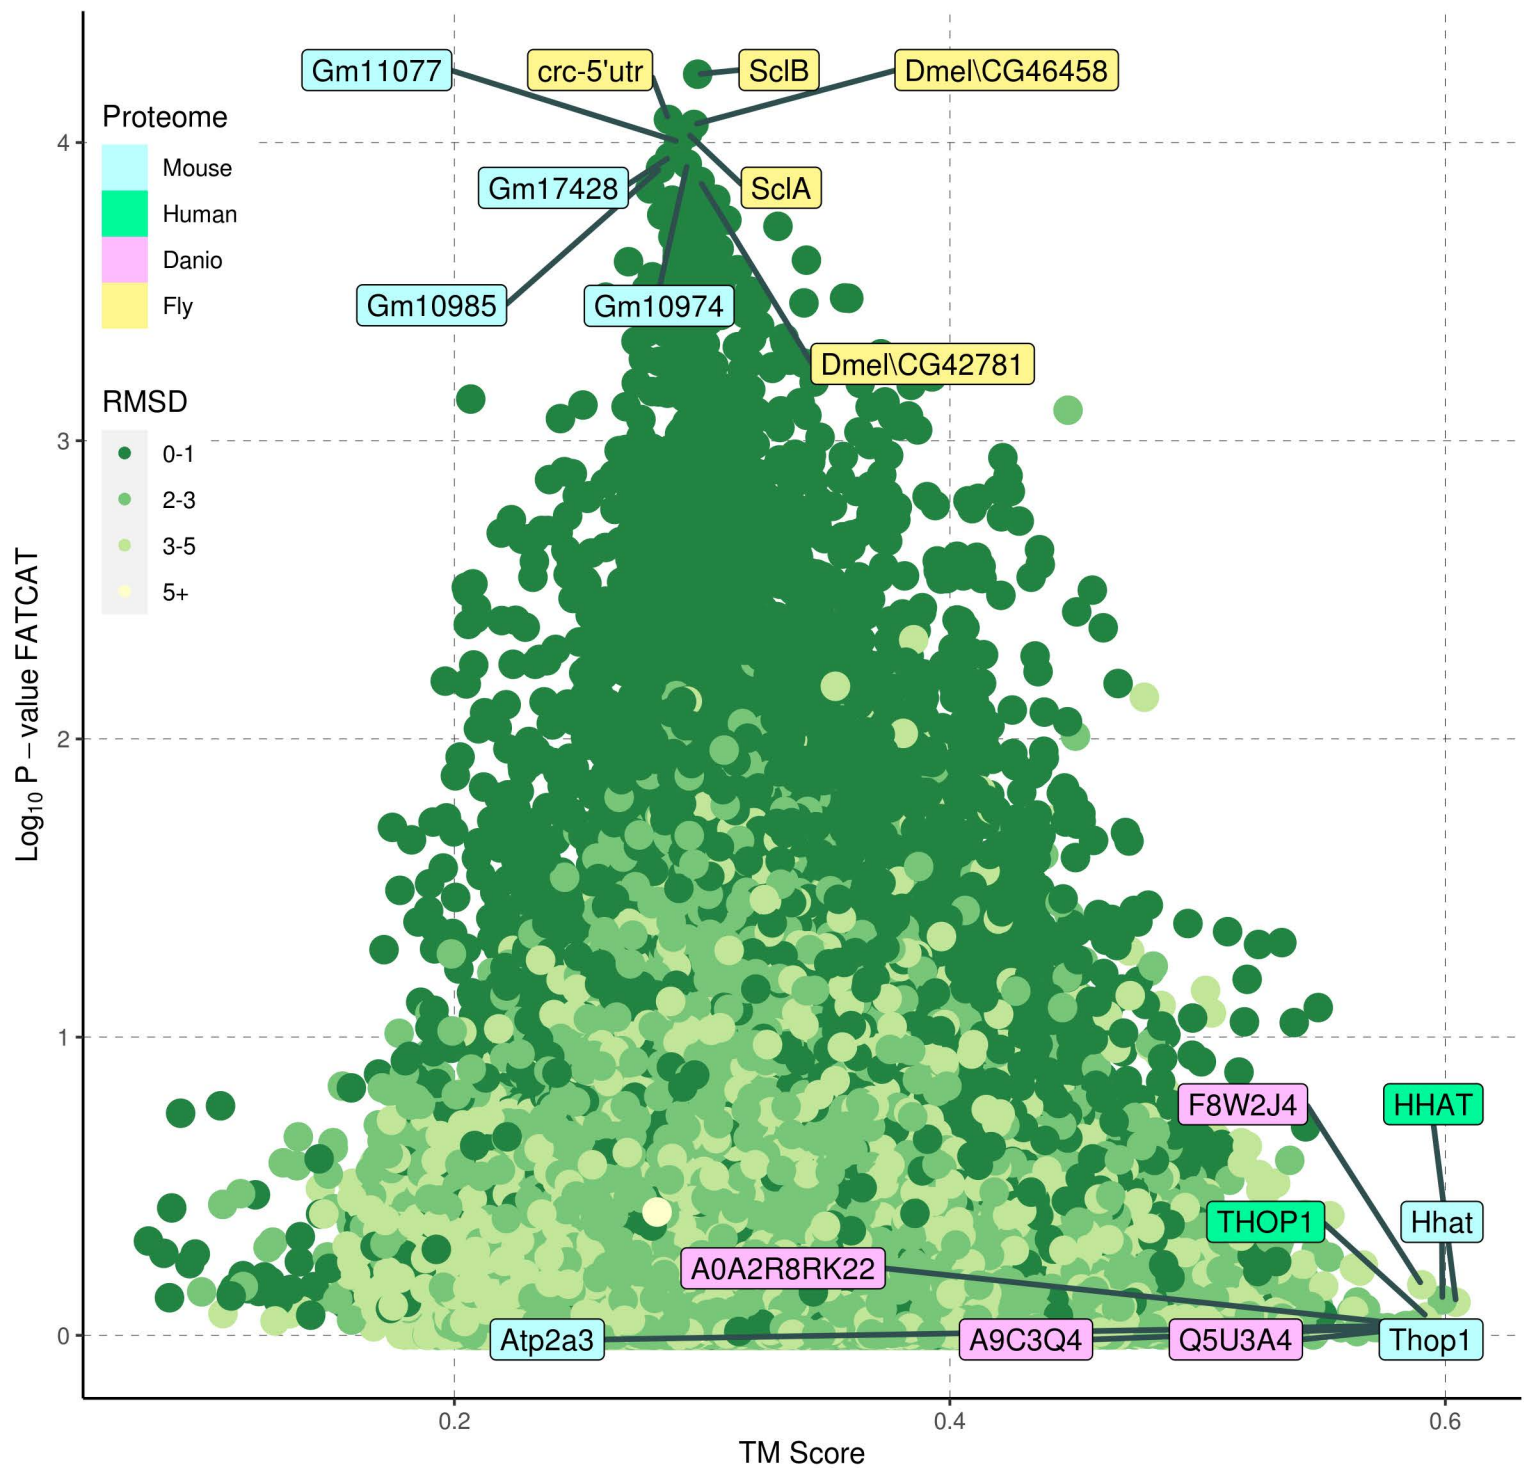

## AorfU

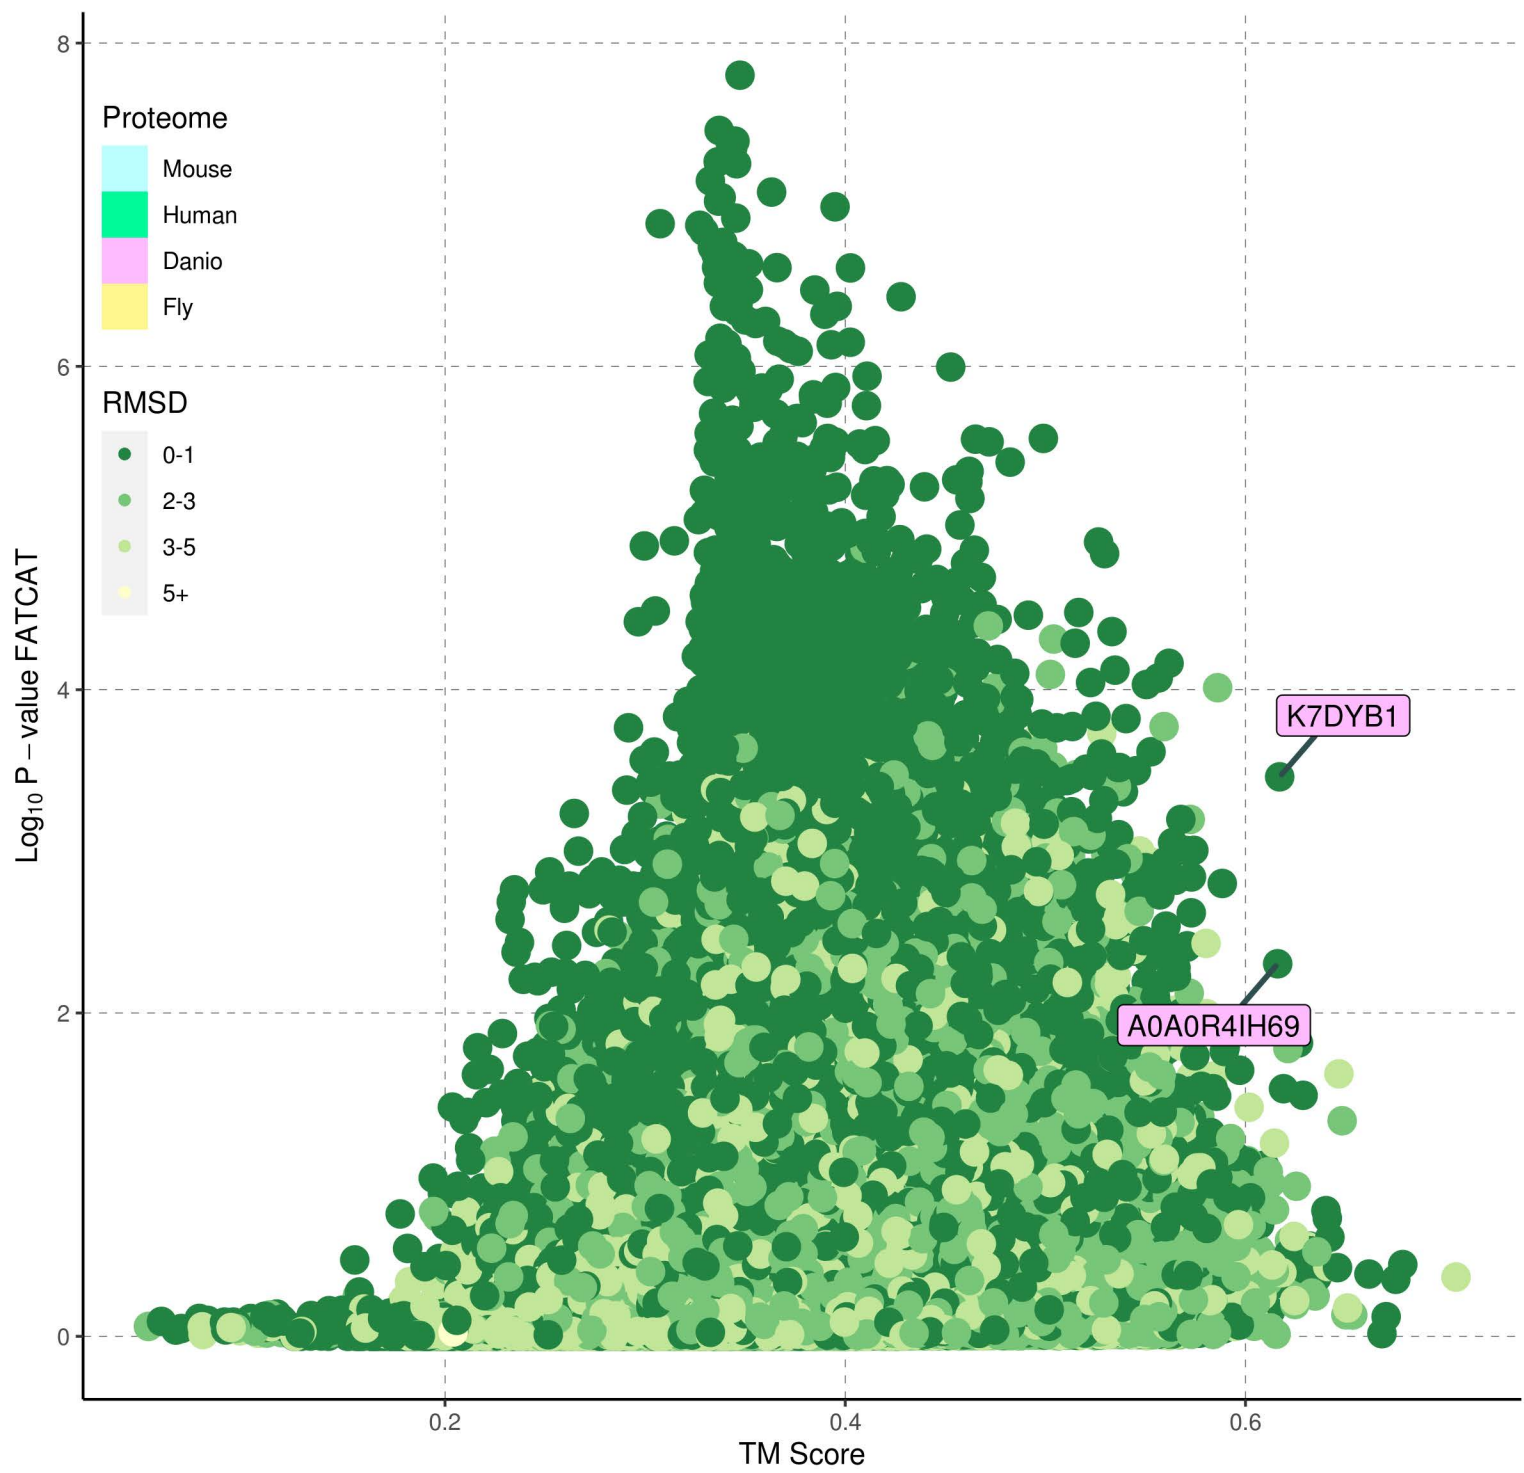

## B1

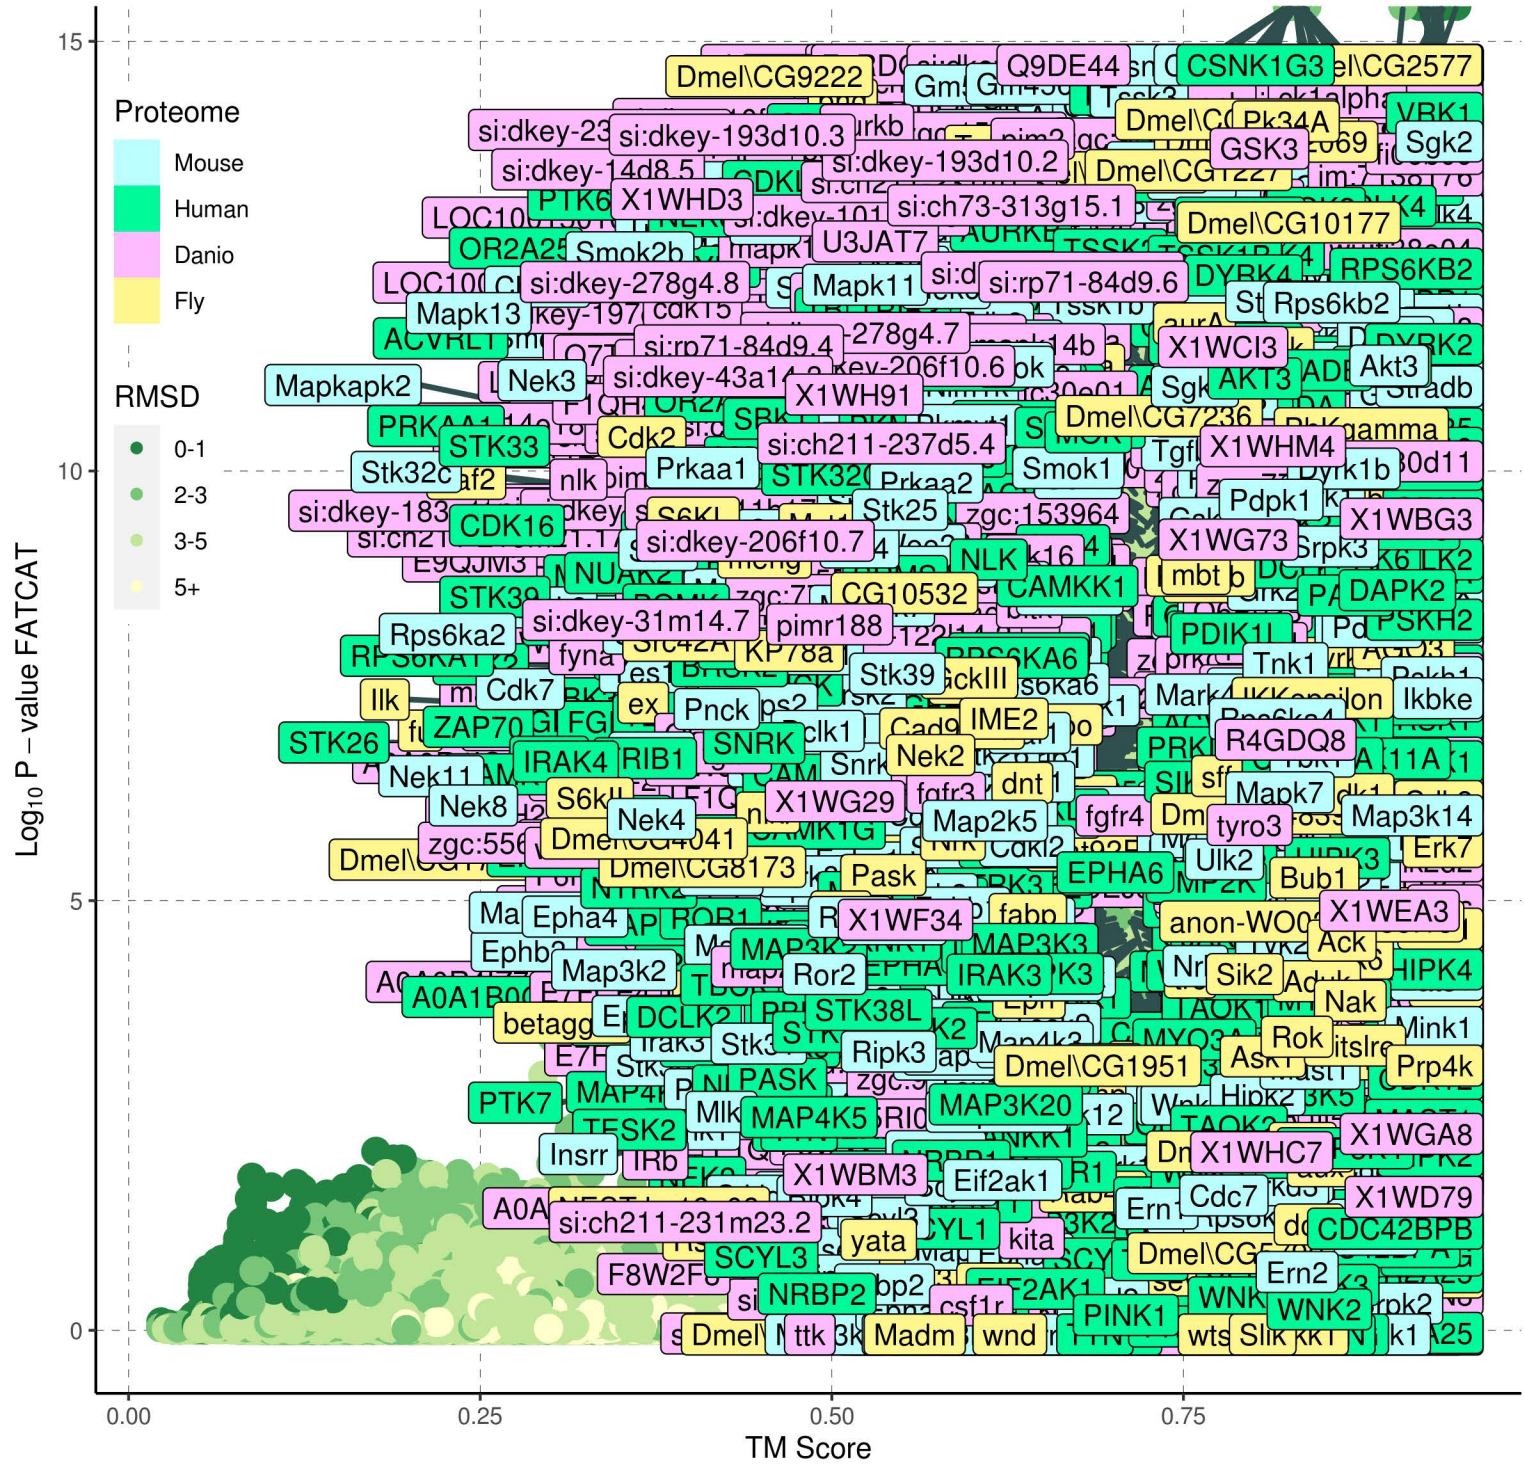

B2 : No hits, top-scoring values are indicated

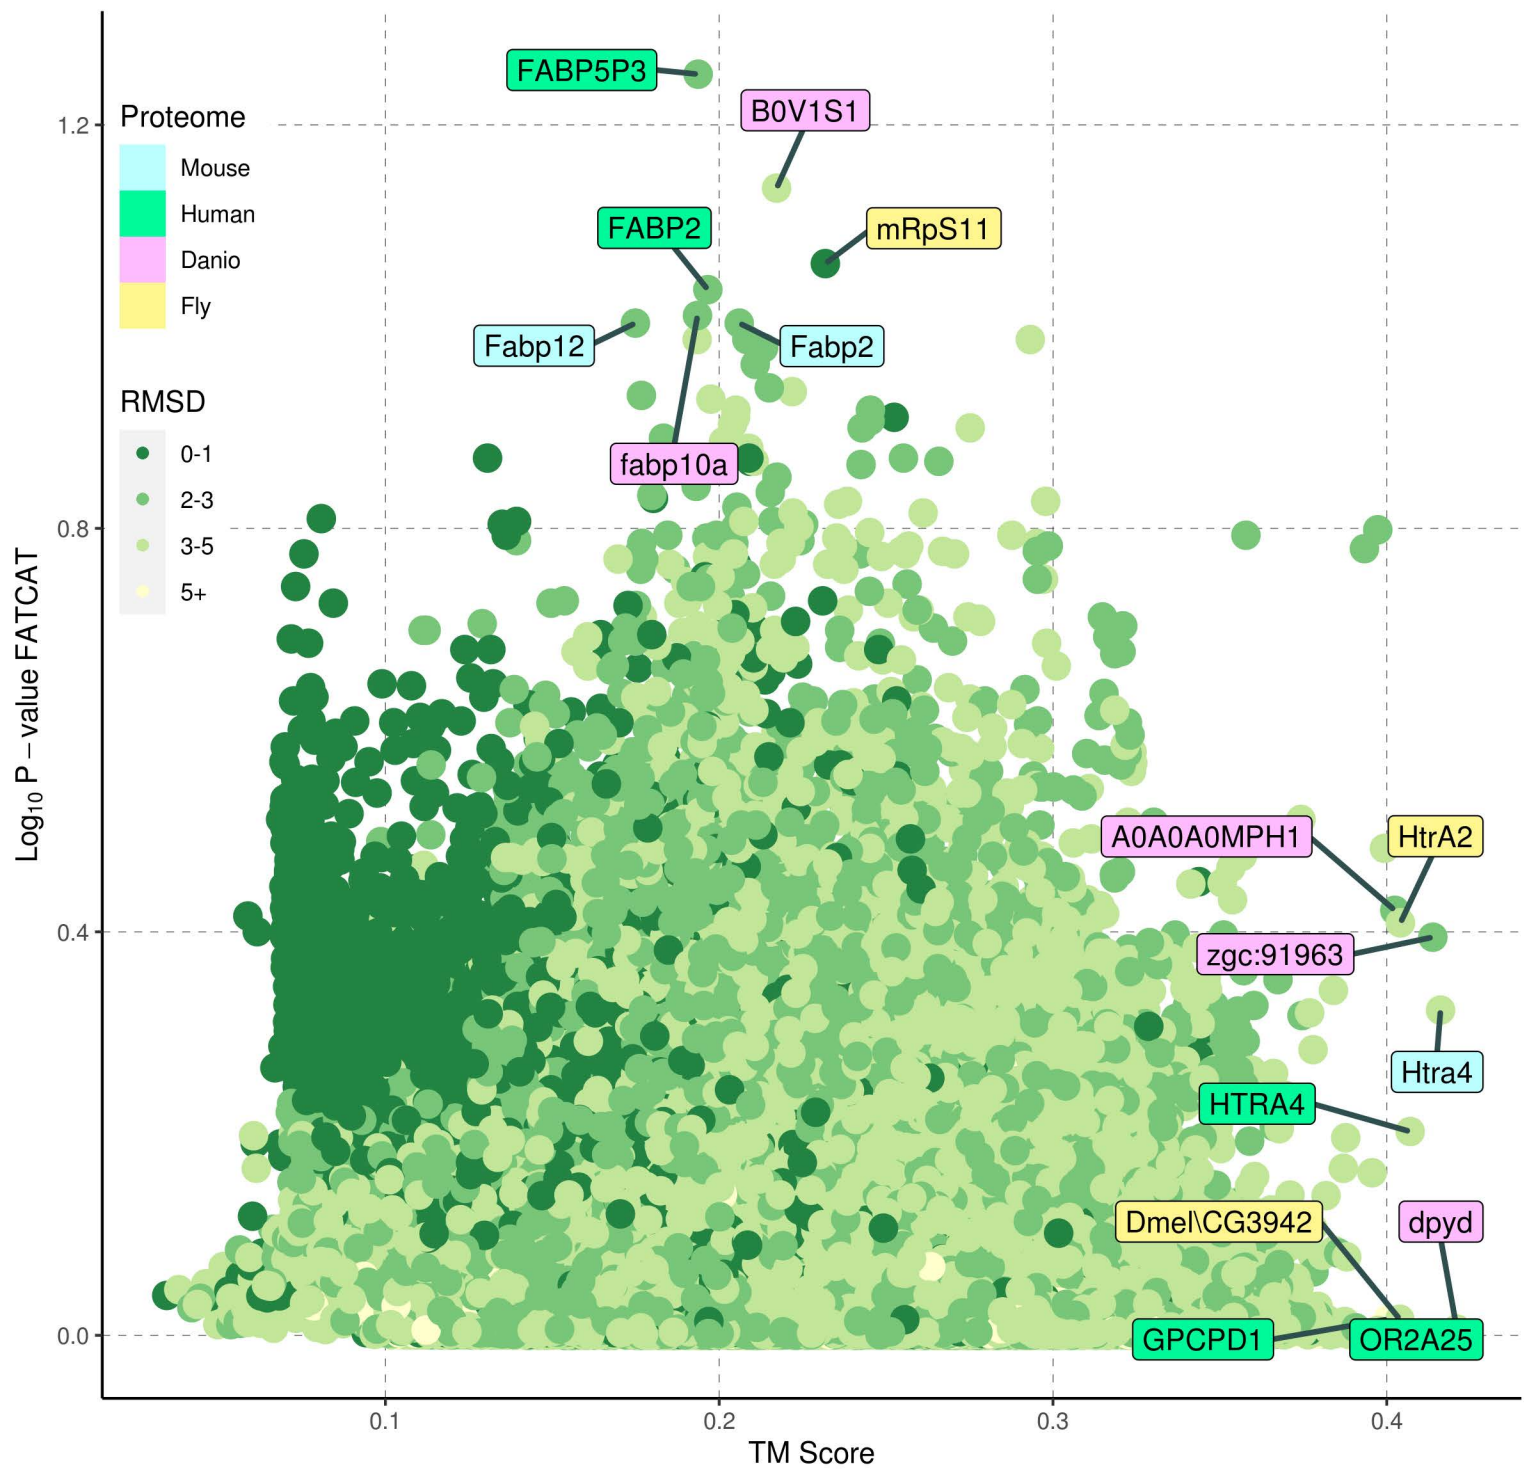

B3

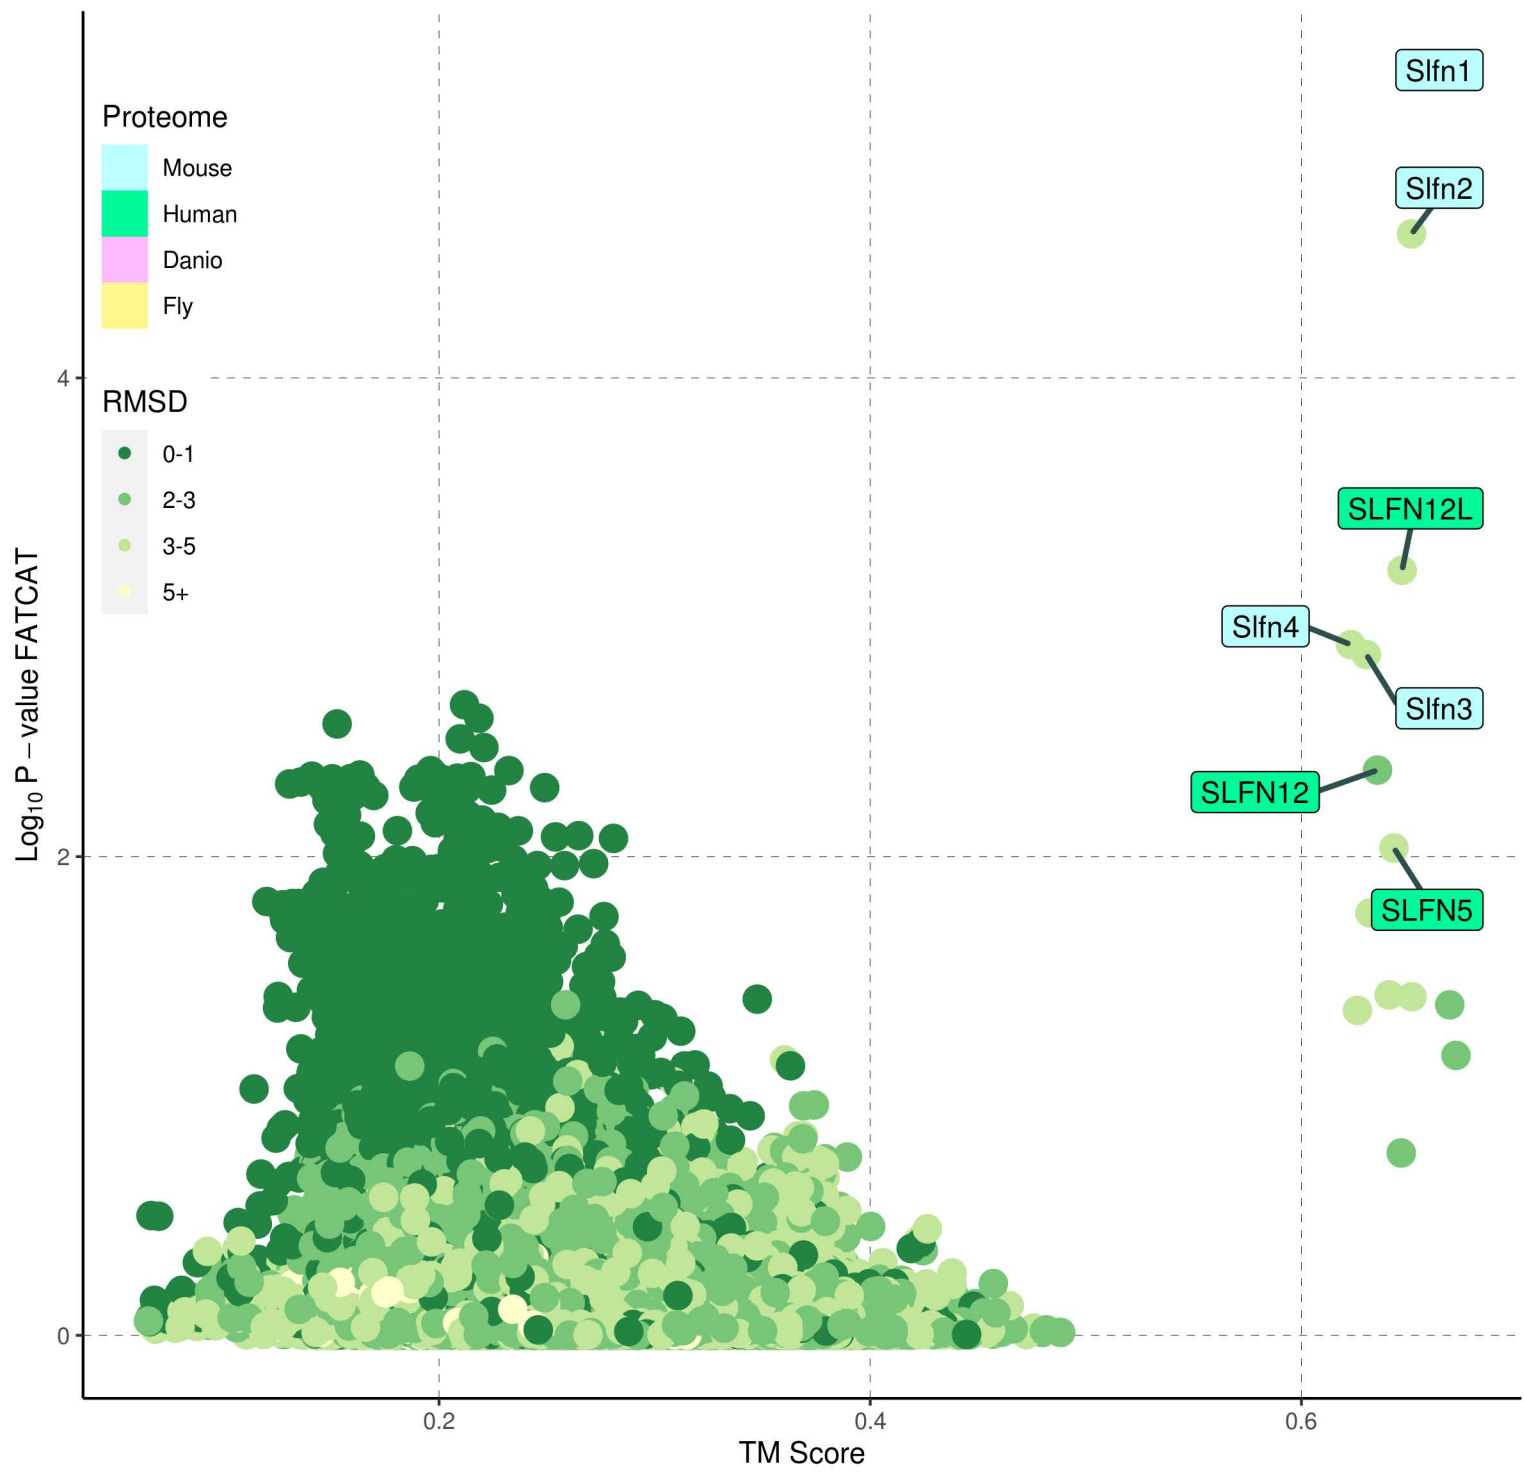

B4 : No hits, top-scoring values are indicated

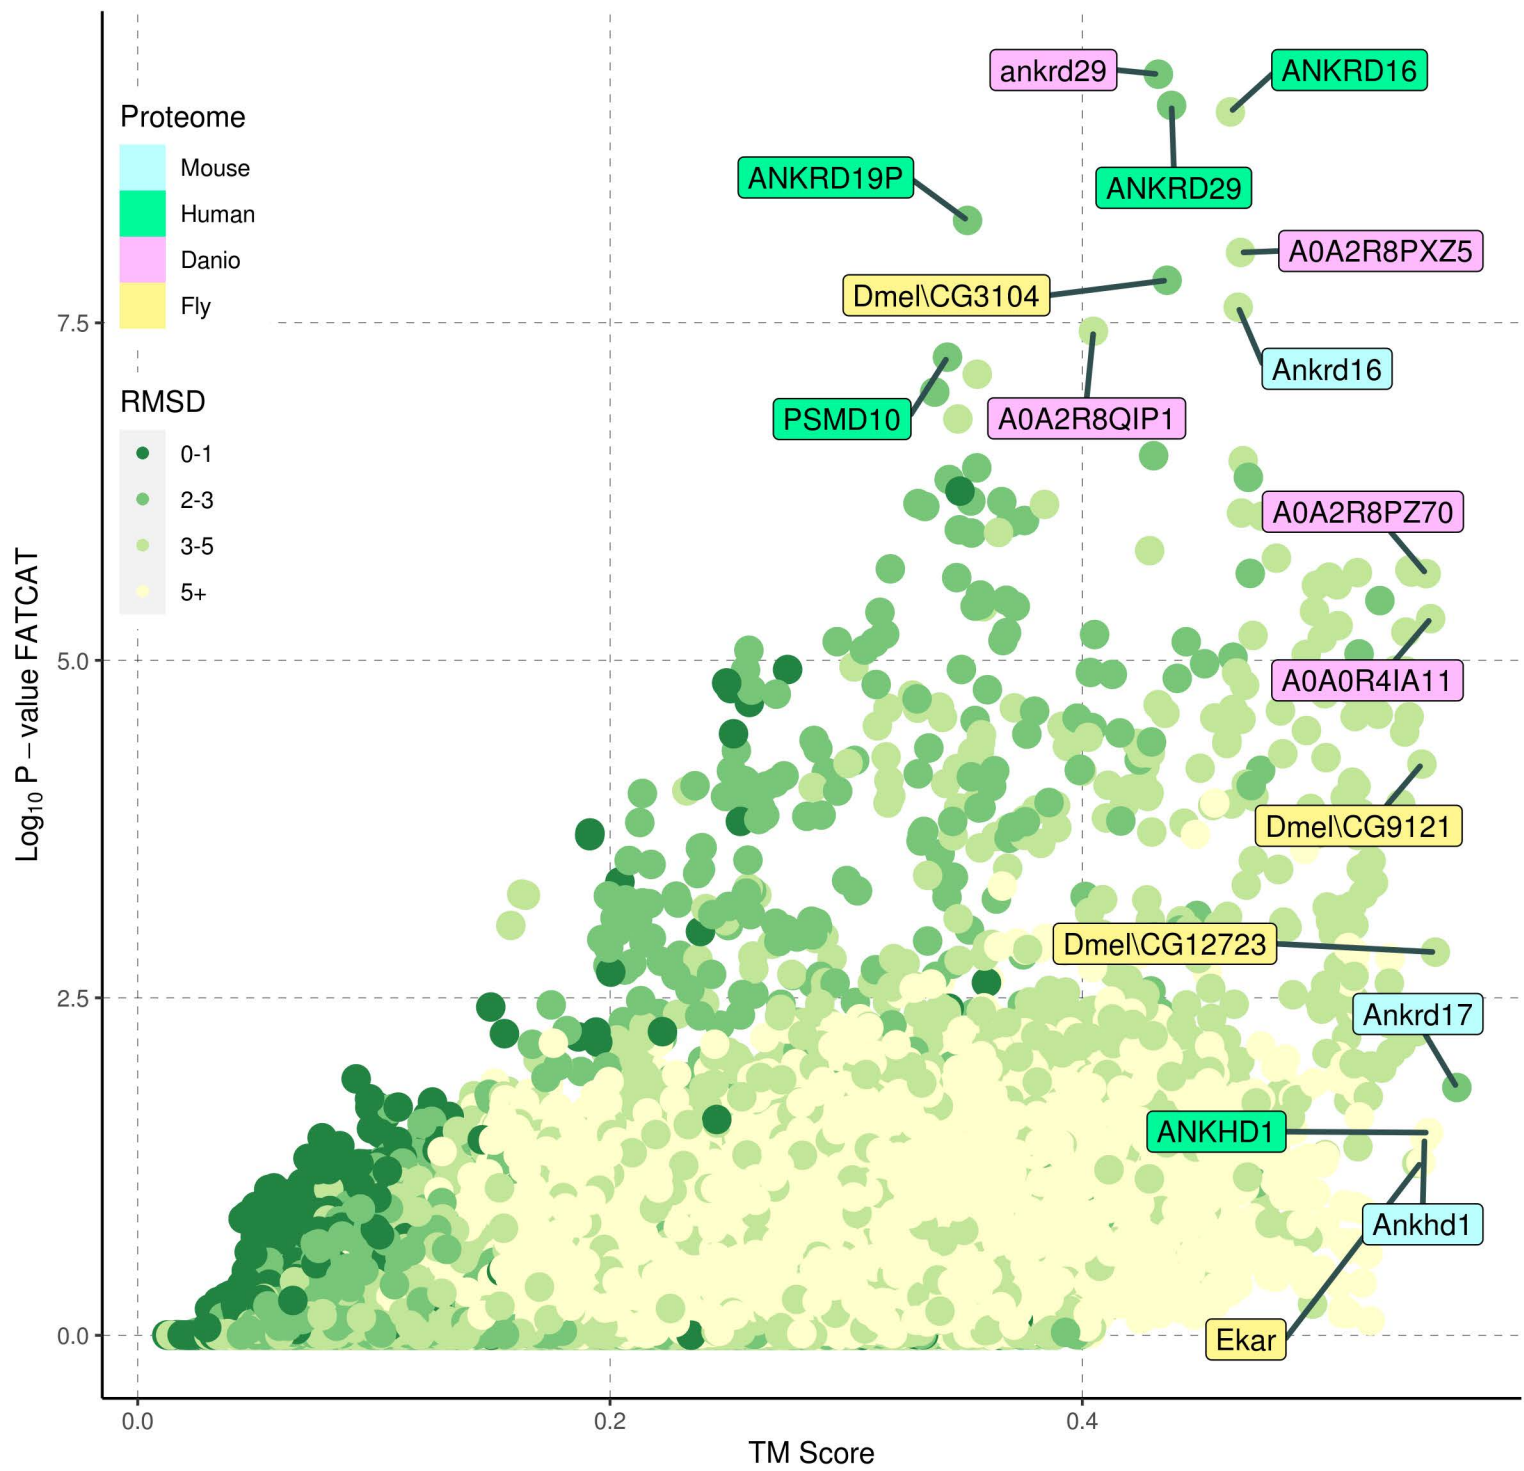



B5 : No hits, top-scoring values are indicated

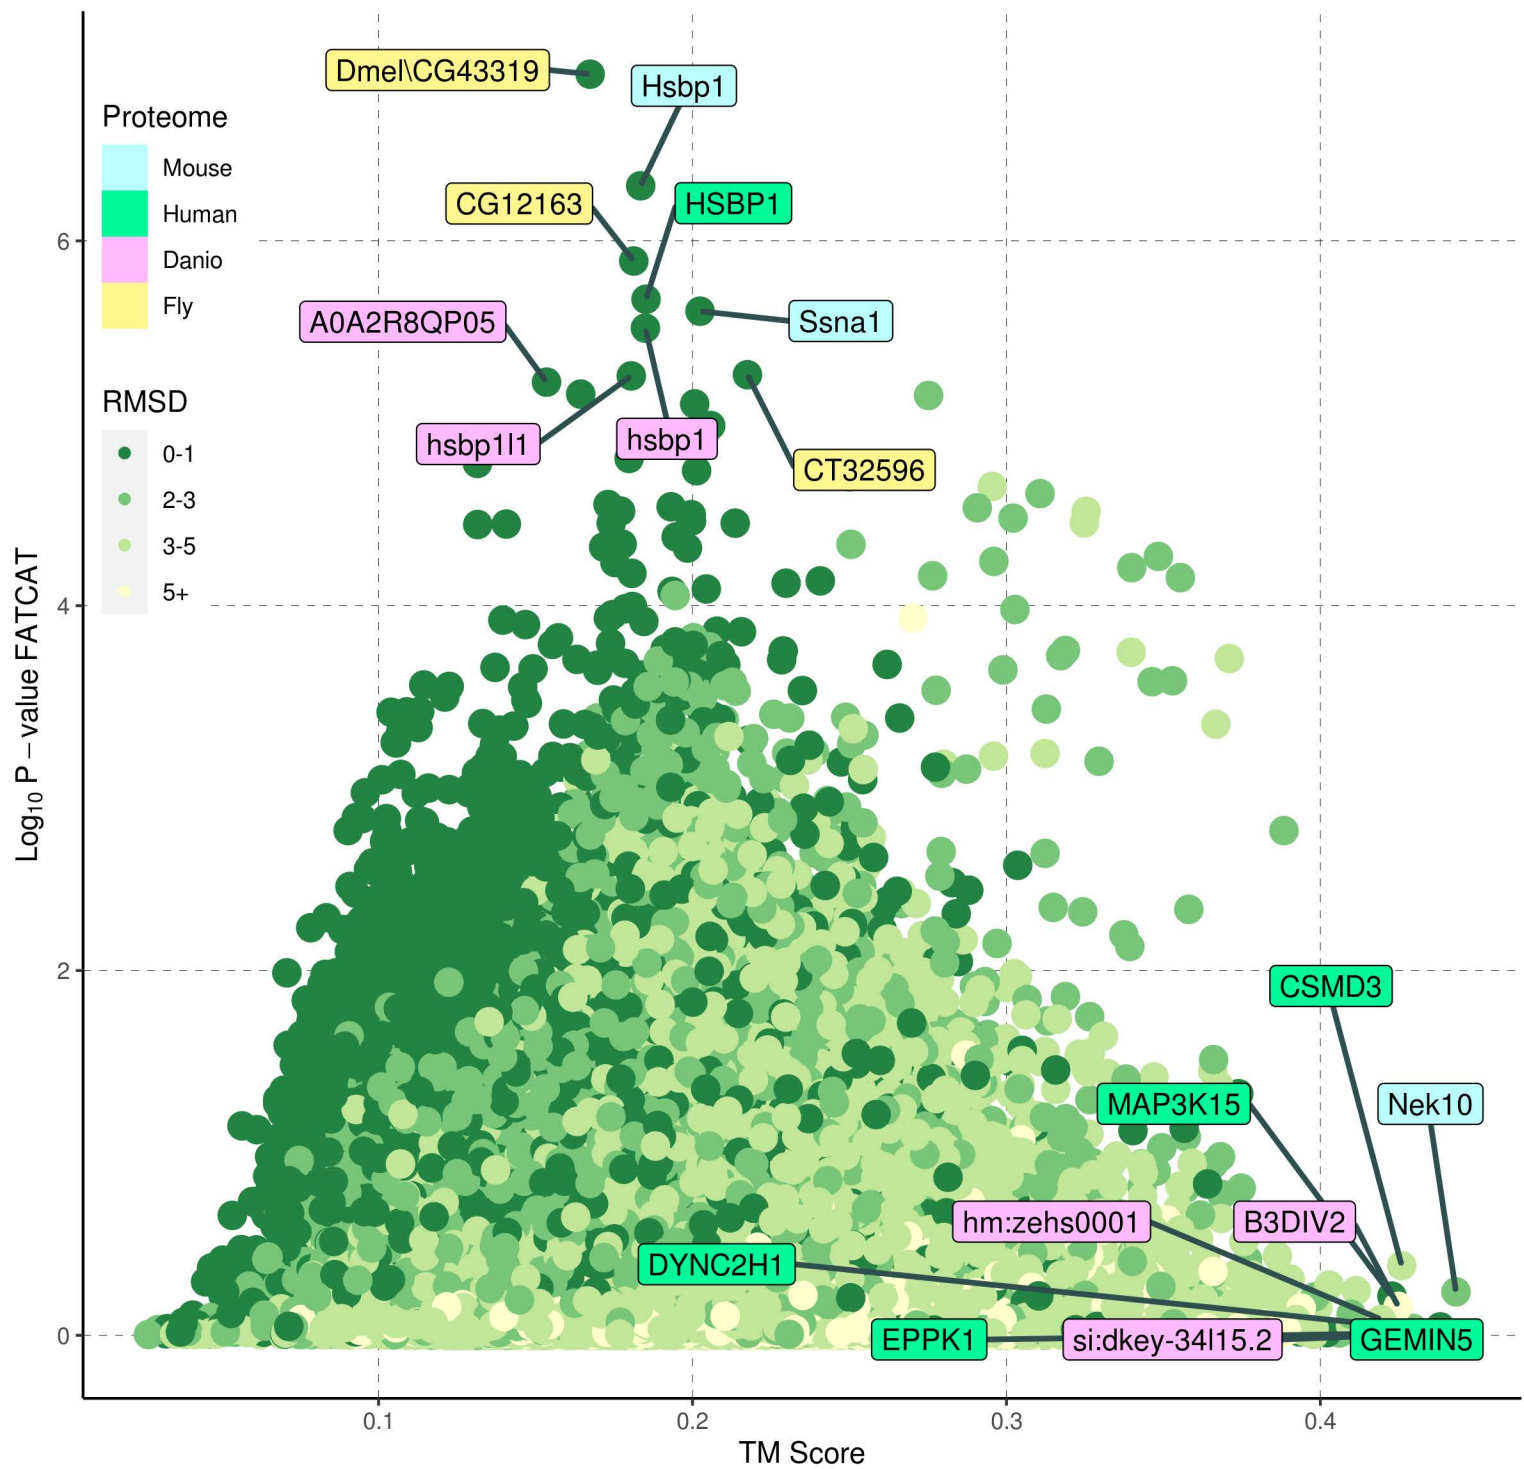

B6

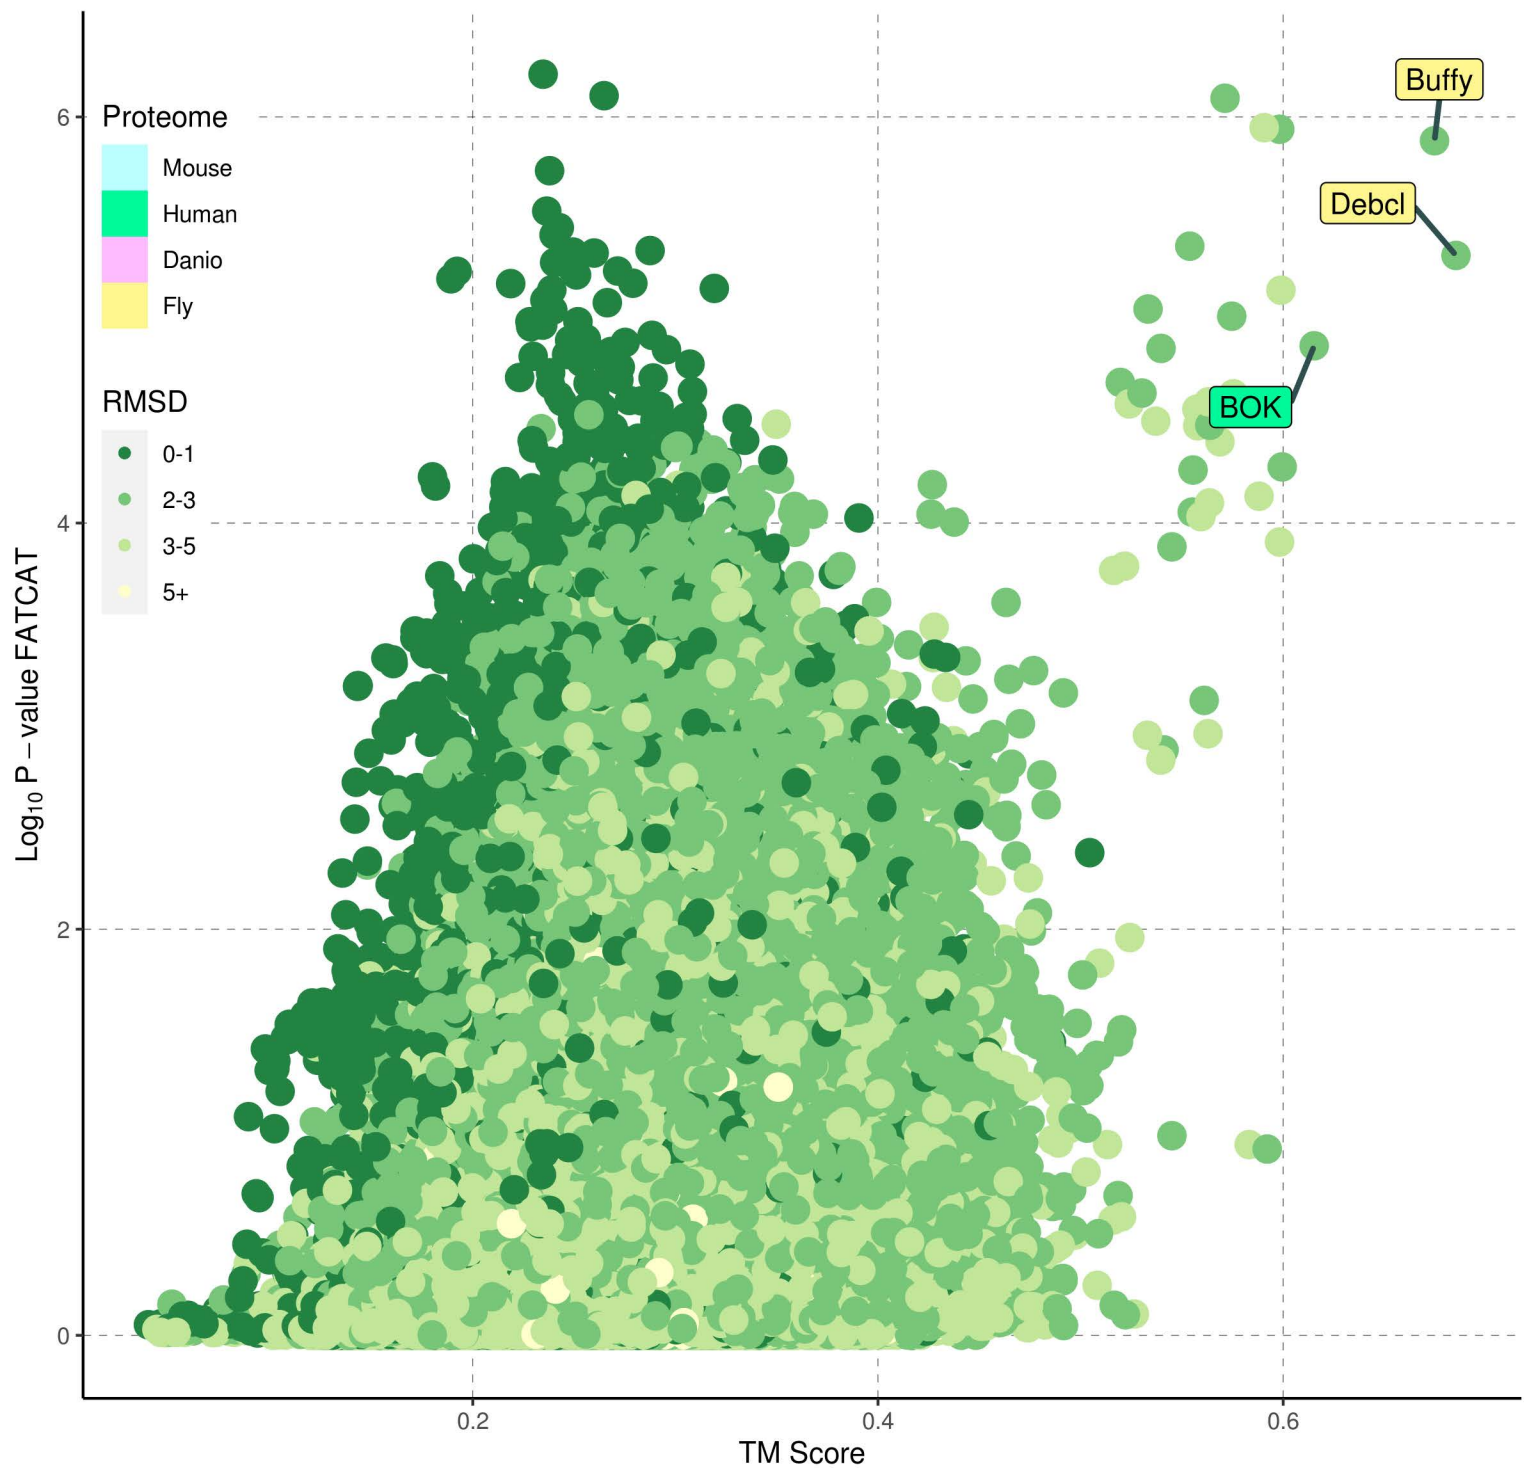

B7 : No hits, top-scoring values are indicated

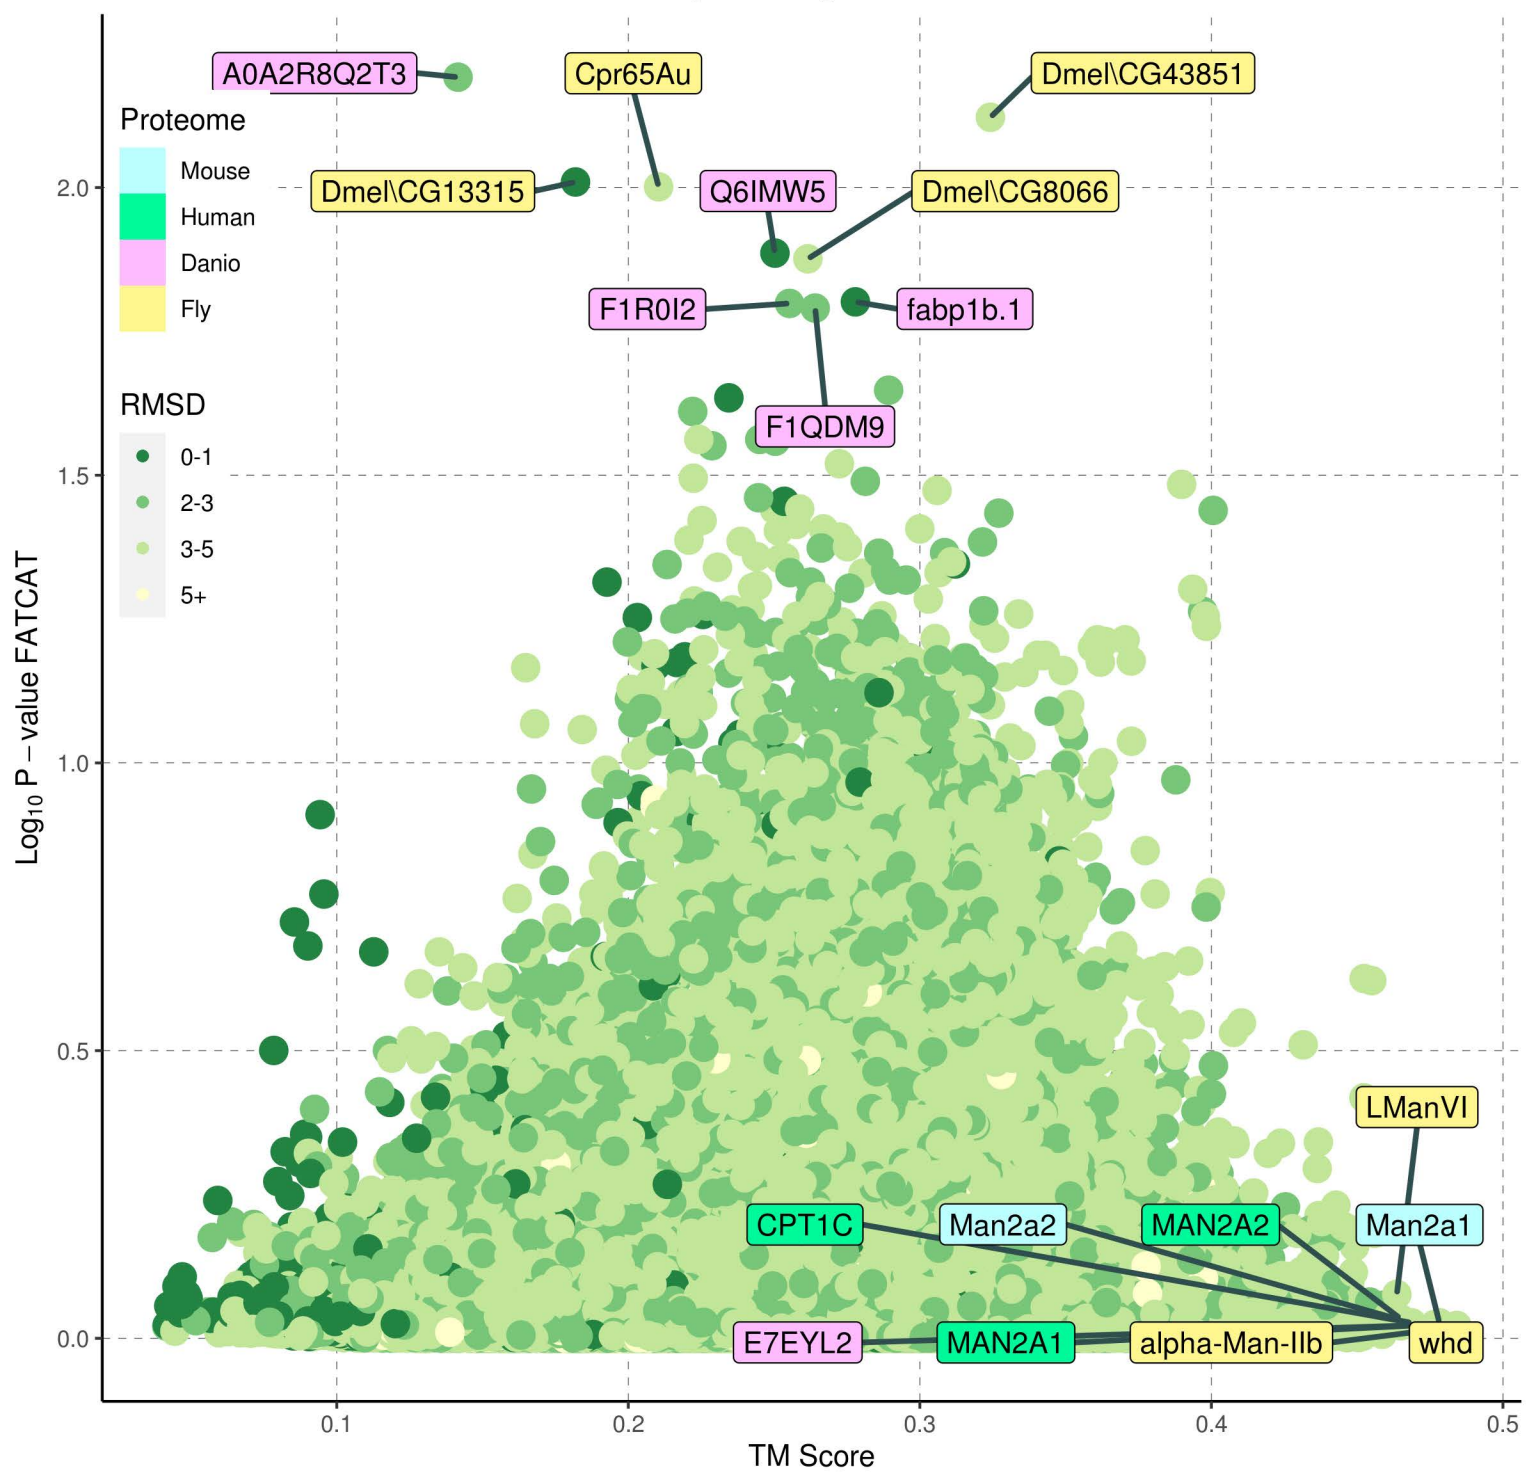

## B8

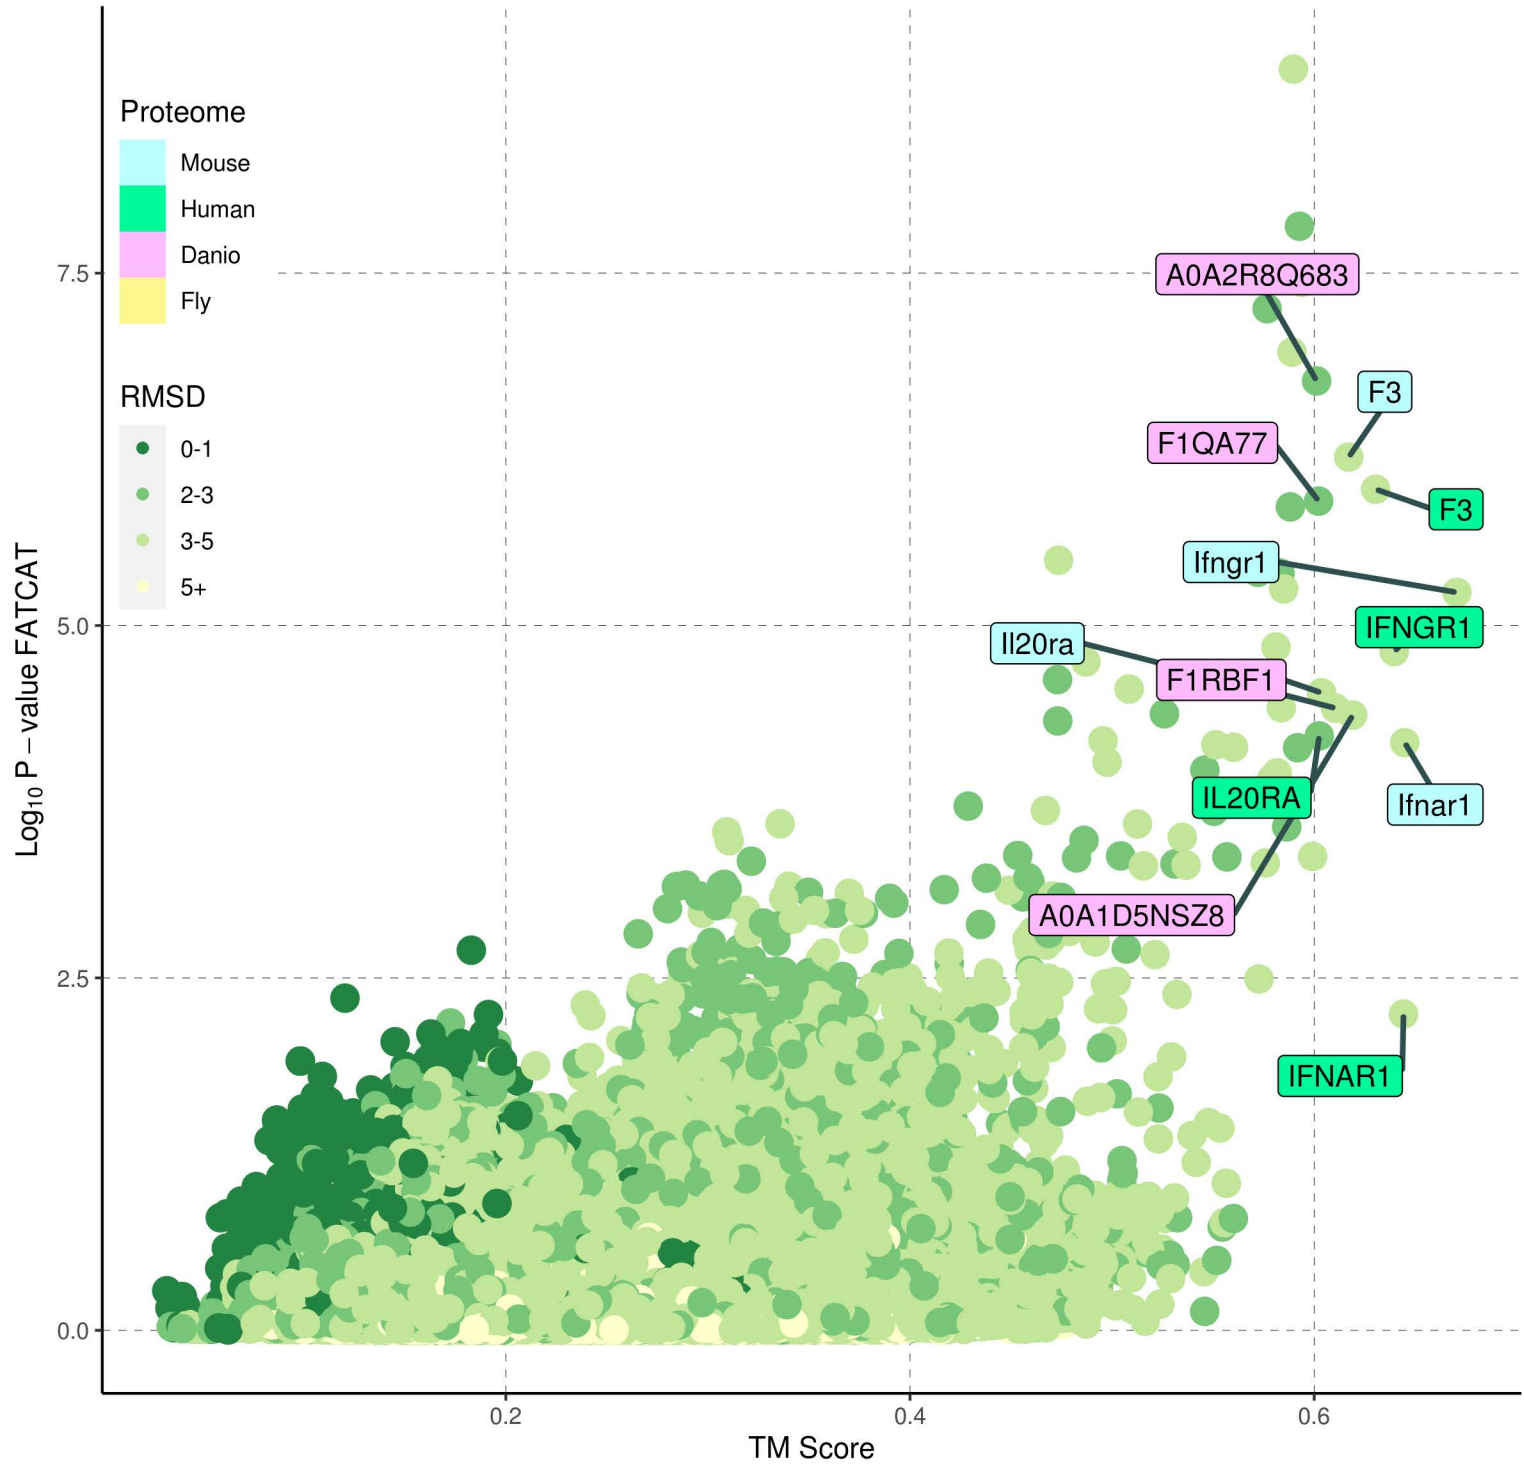

B9 : No hits, top-scoring values are indicated

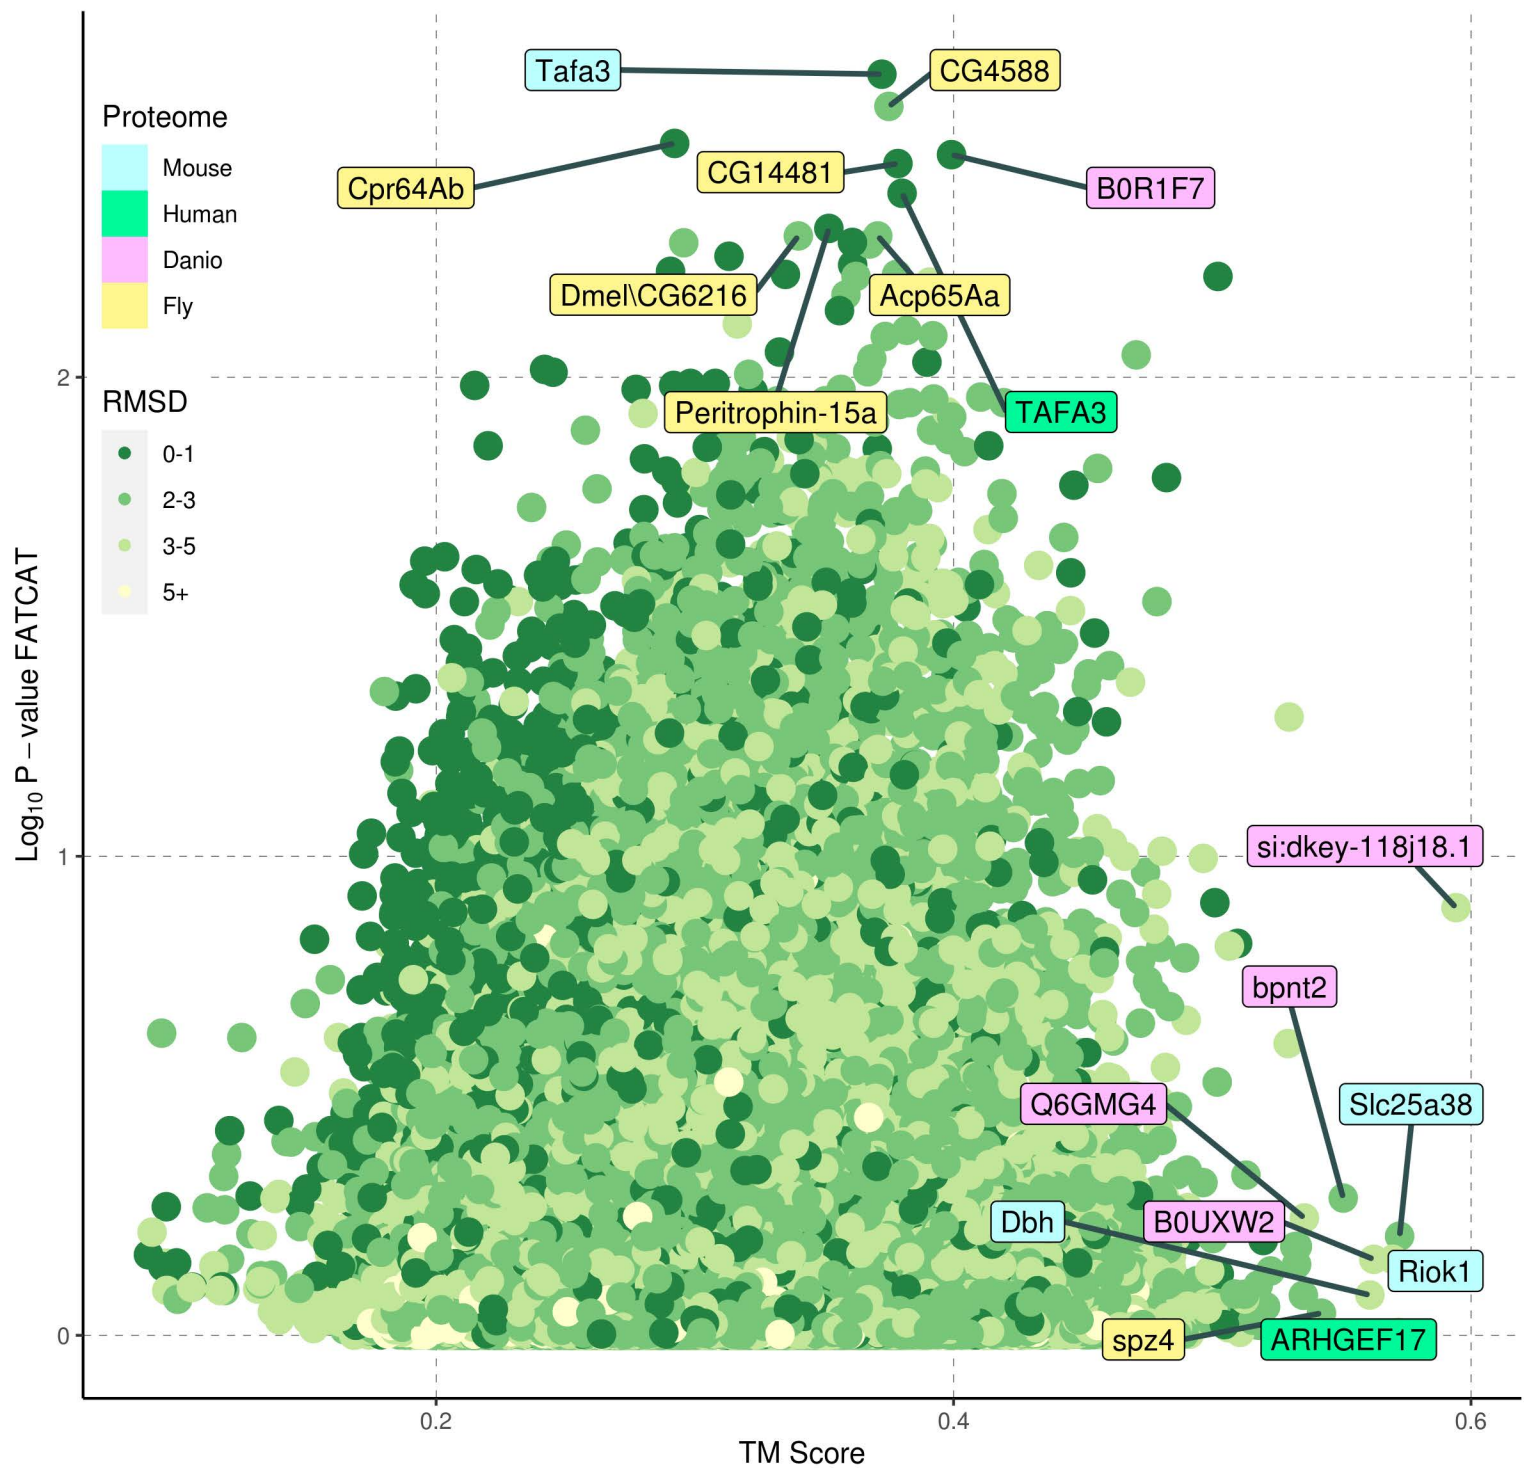





# B12

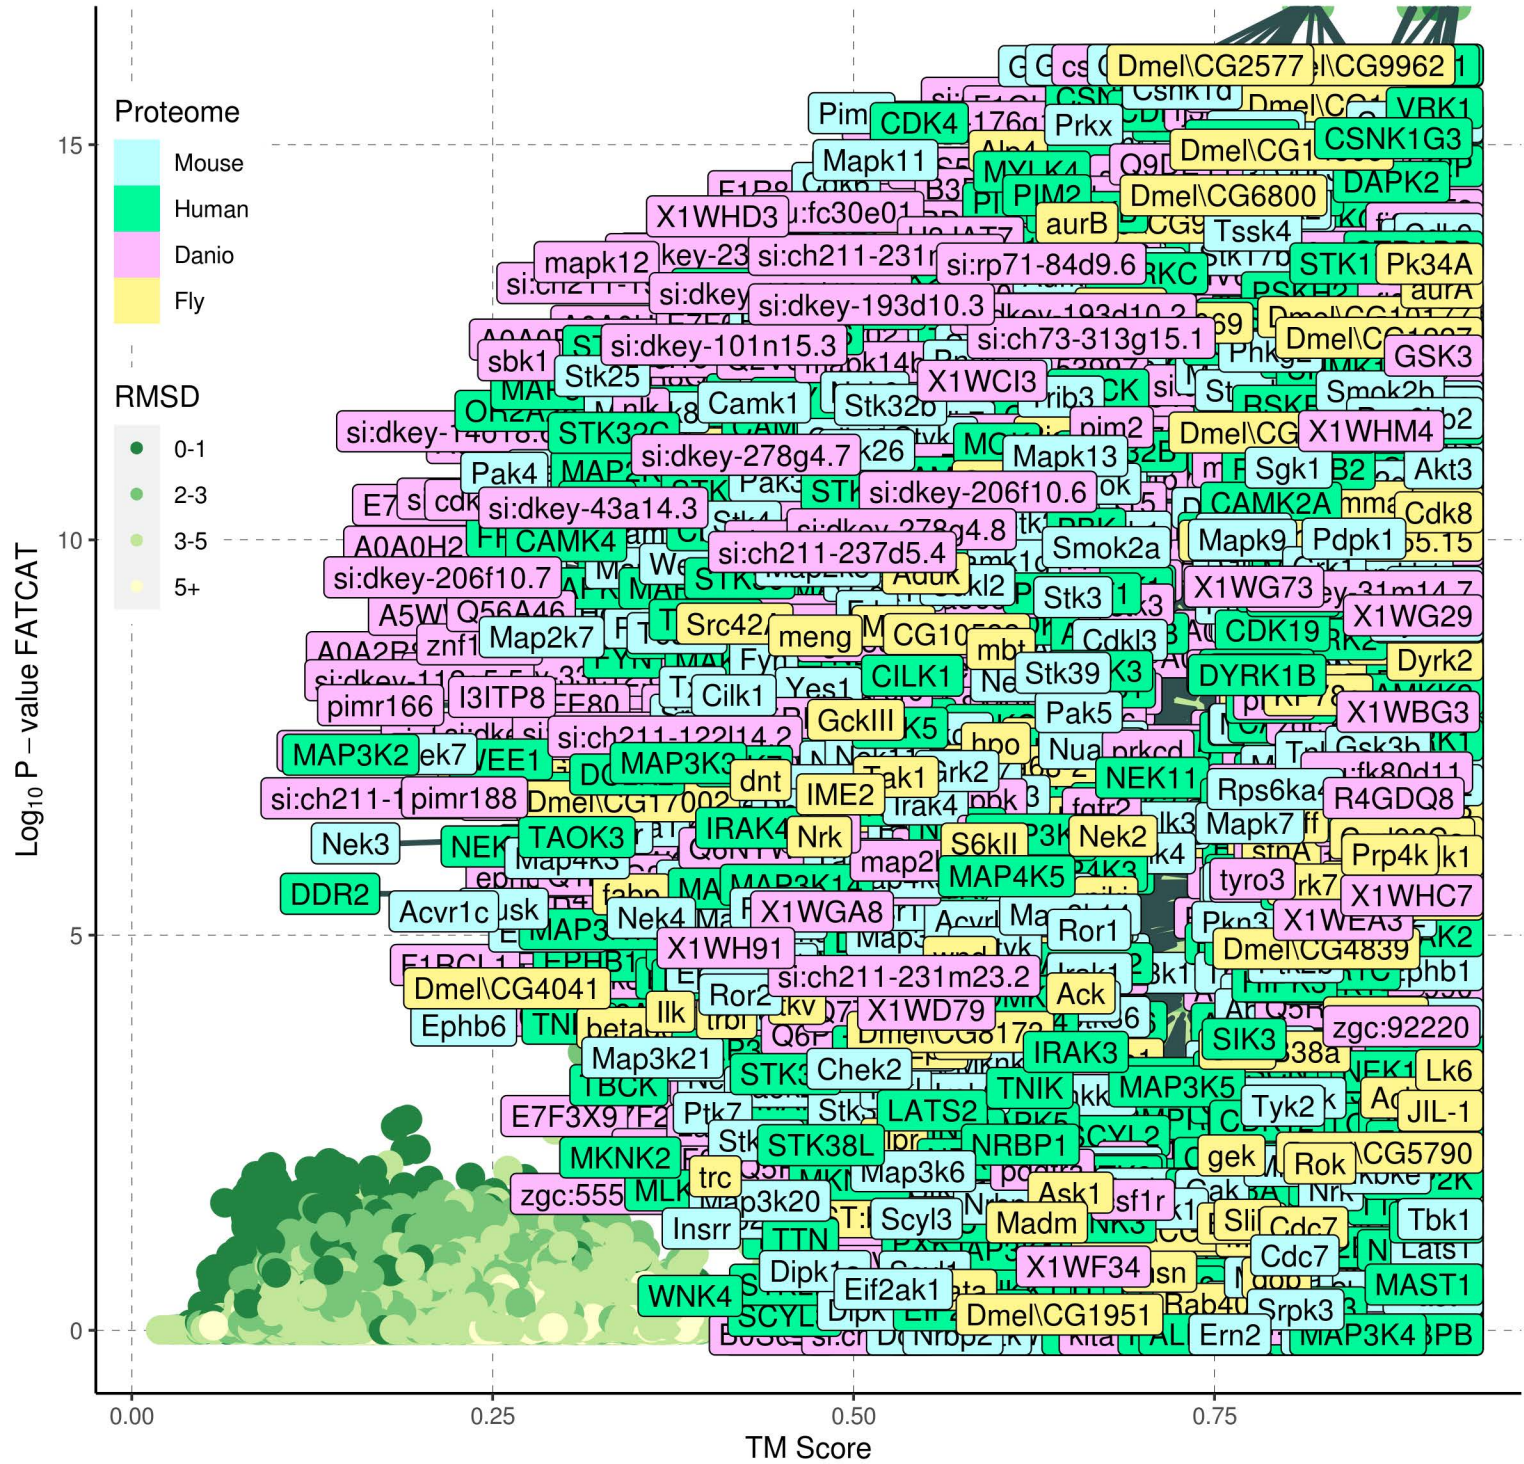



# B13

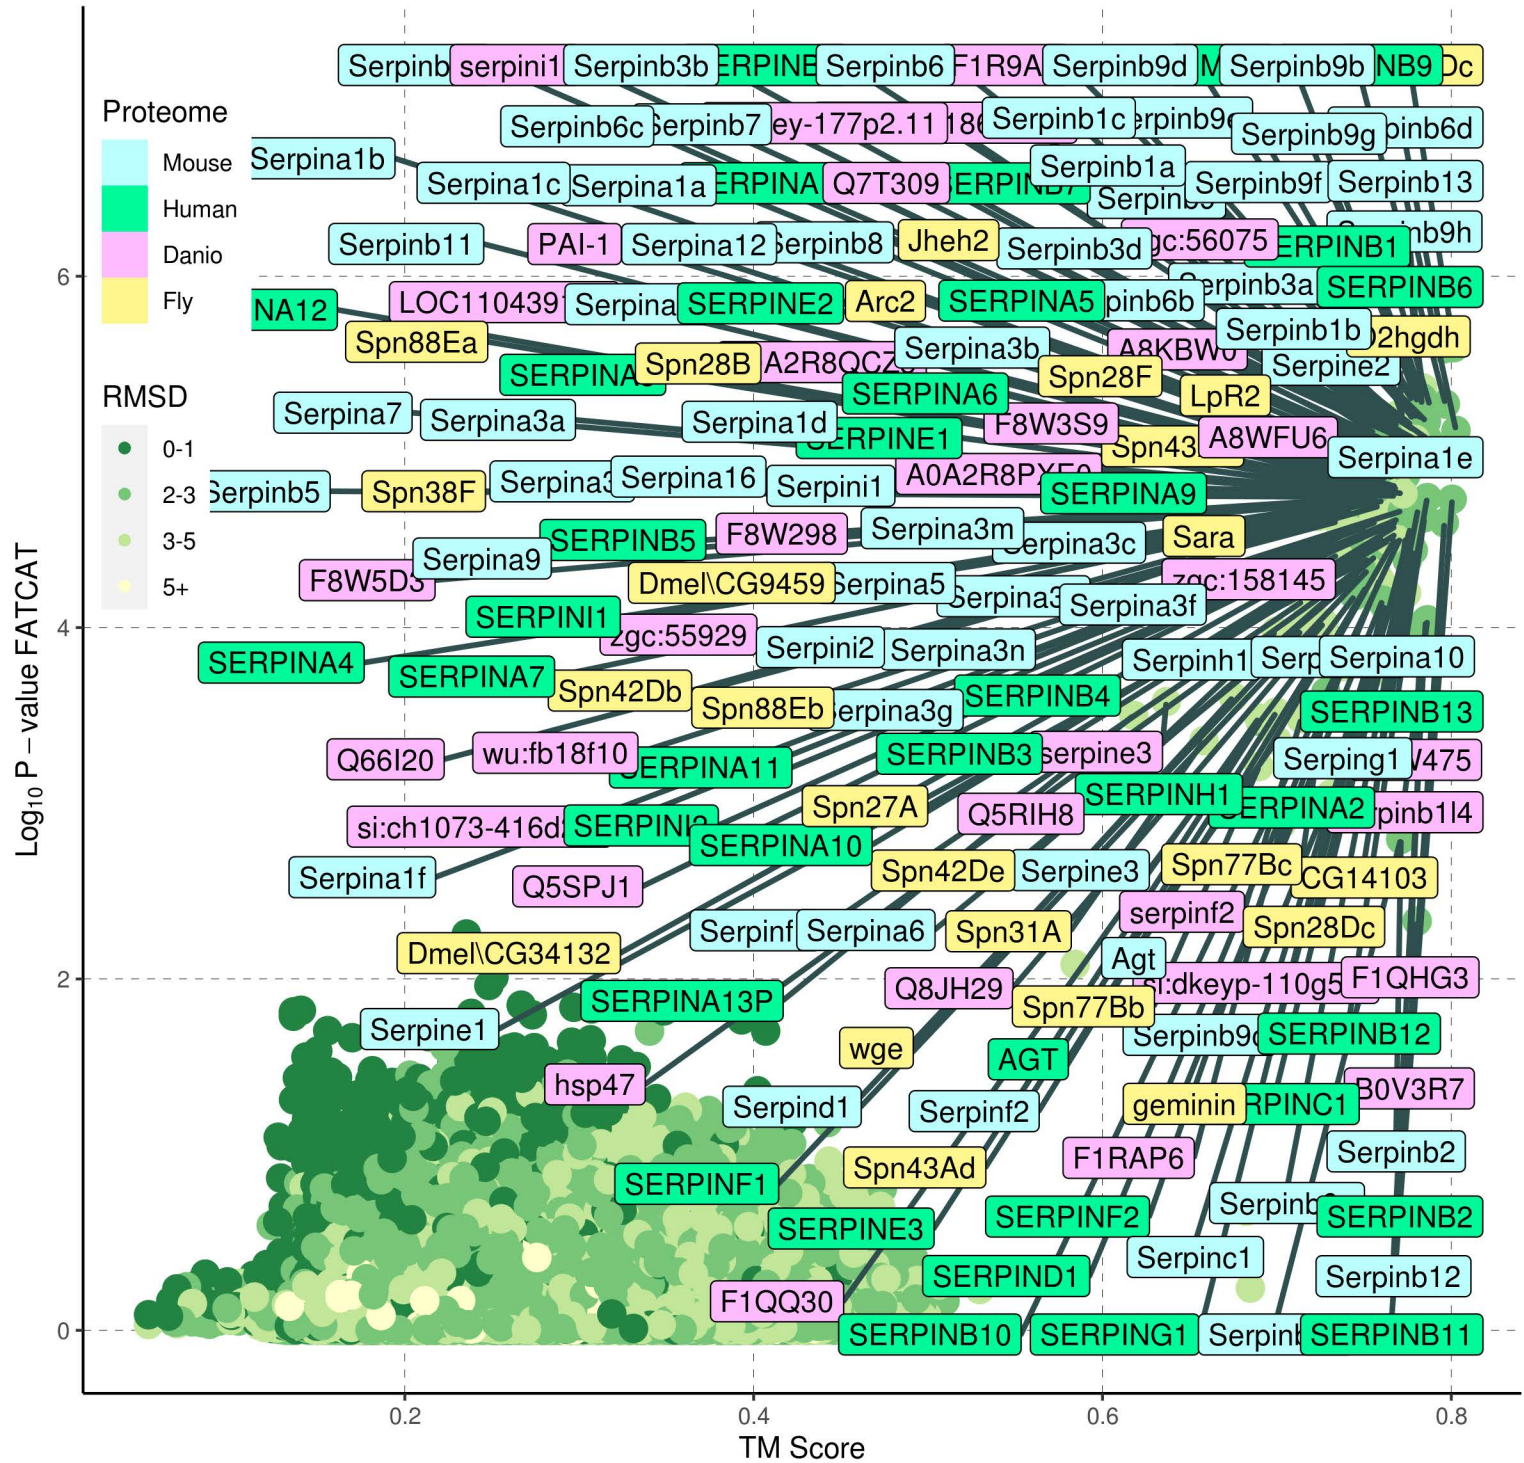



## B15

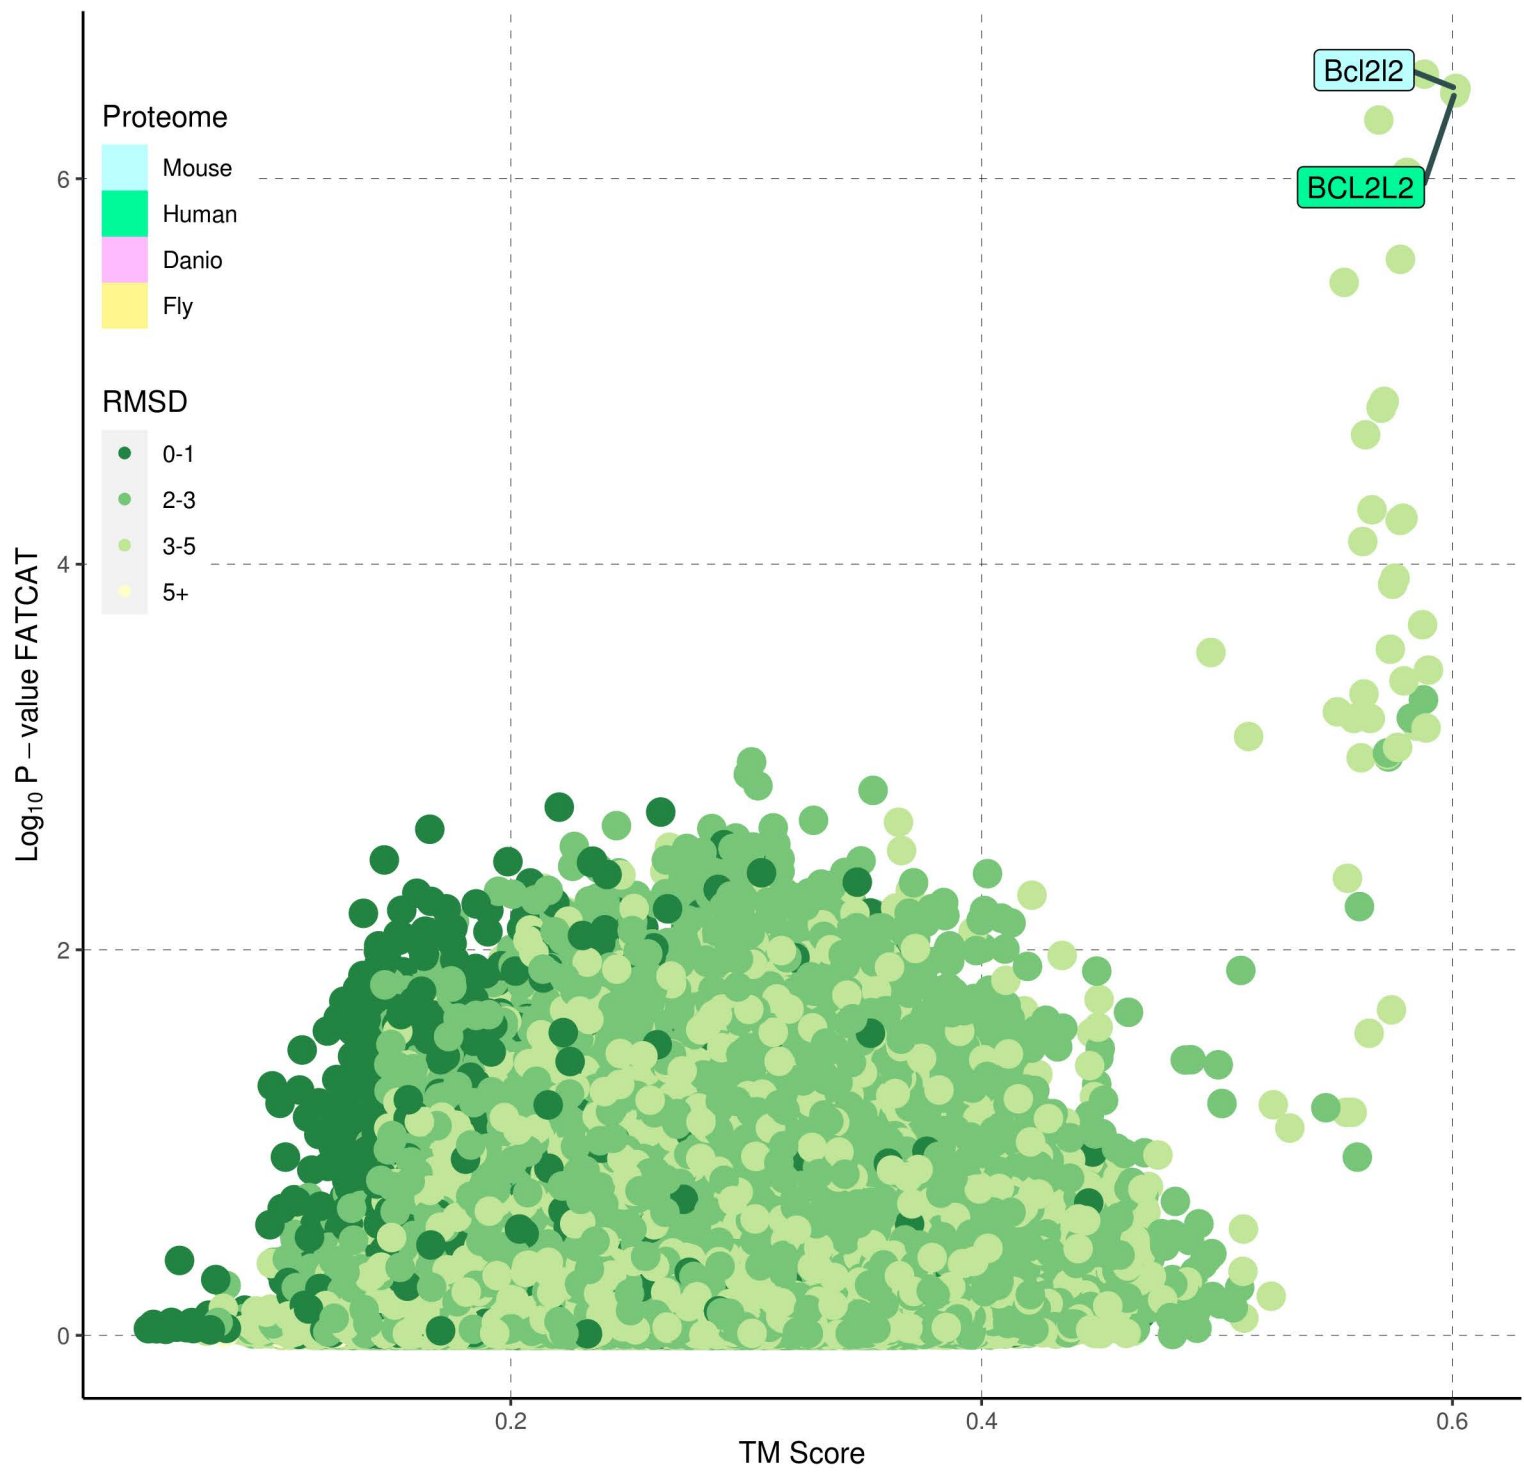



# B17 : No hits, top-scoring values are indicated

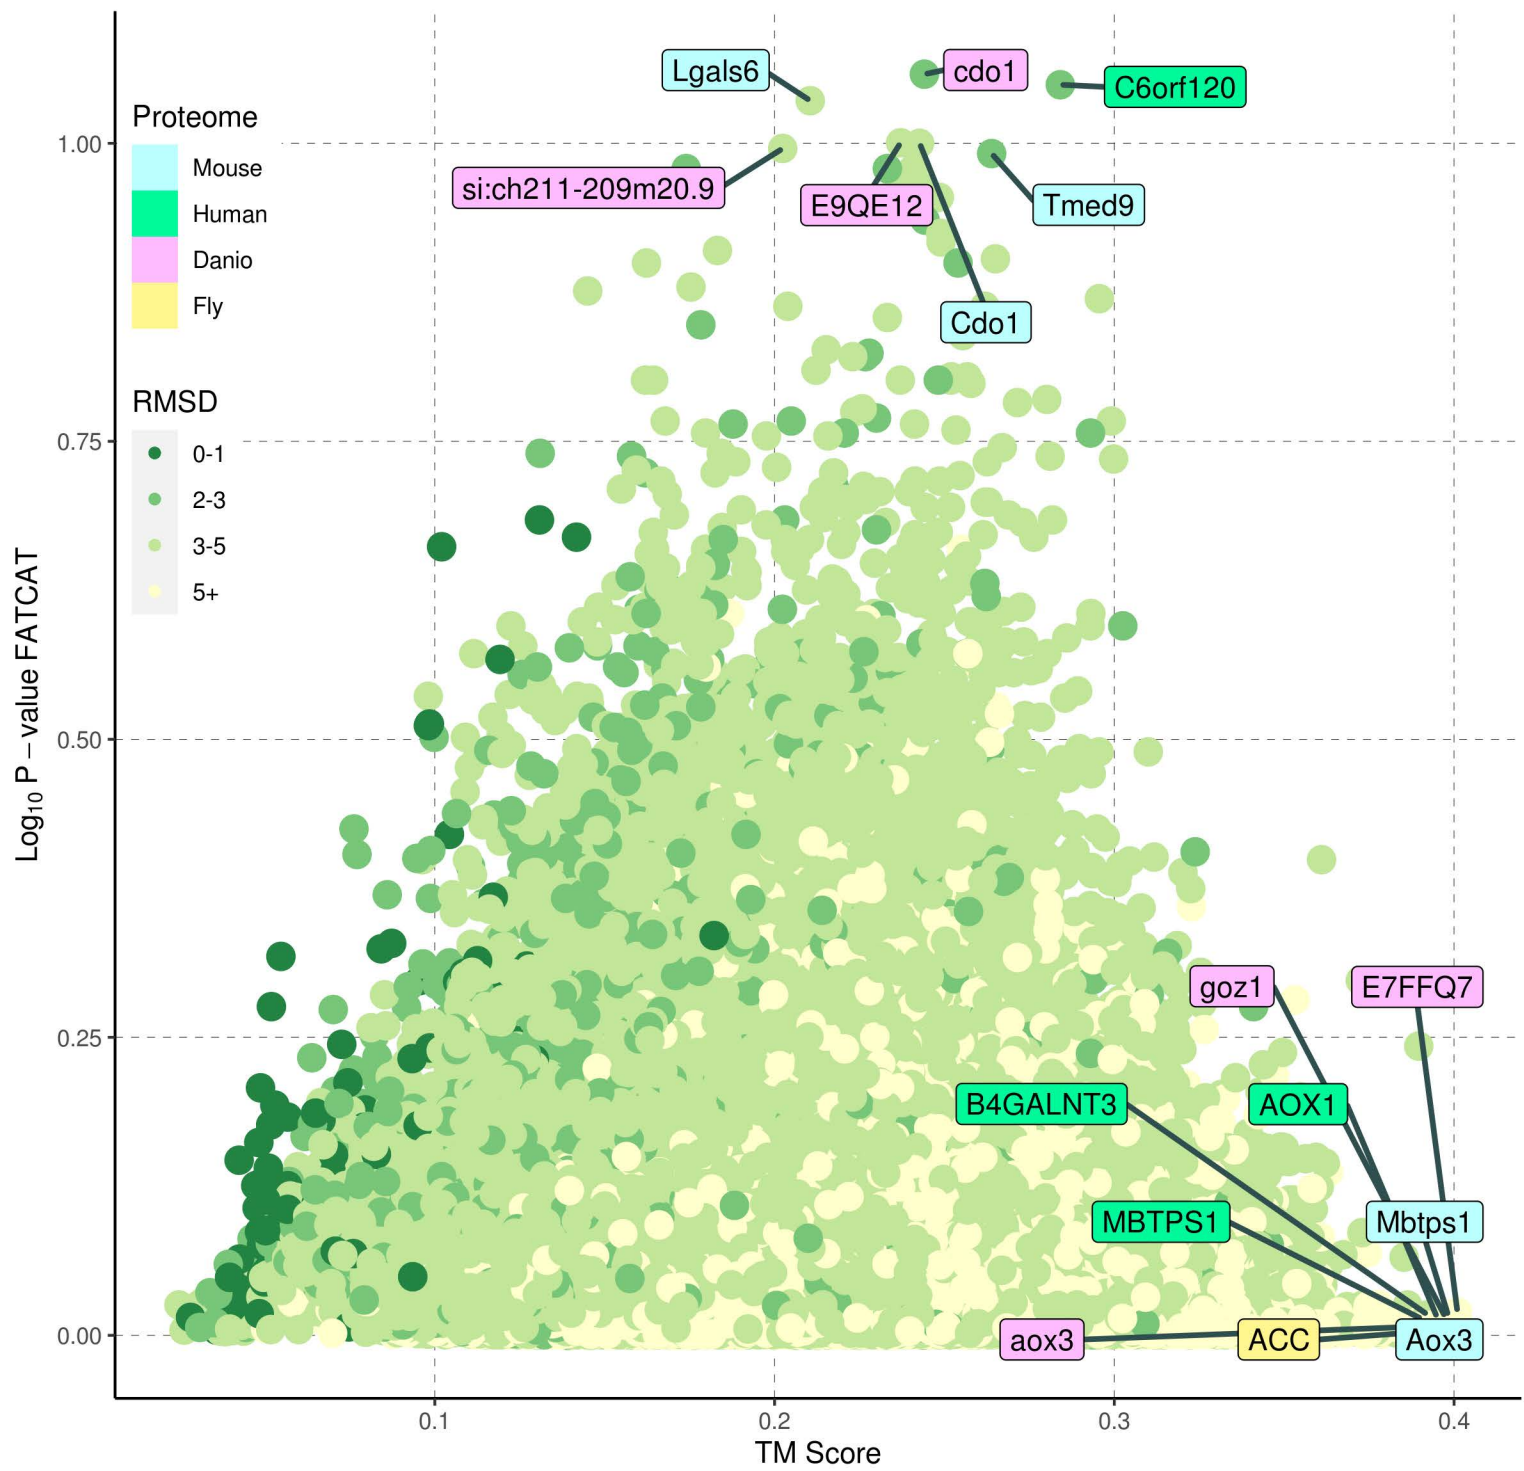

## B18

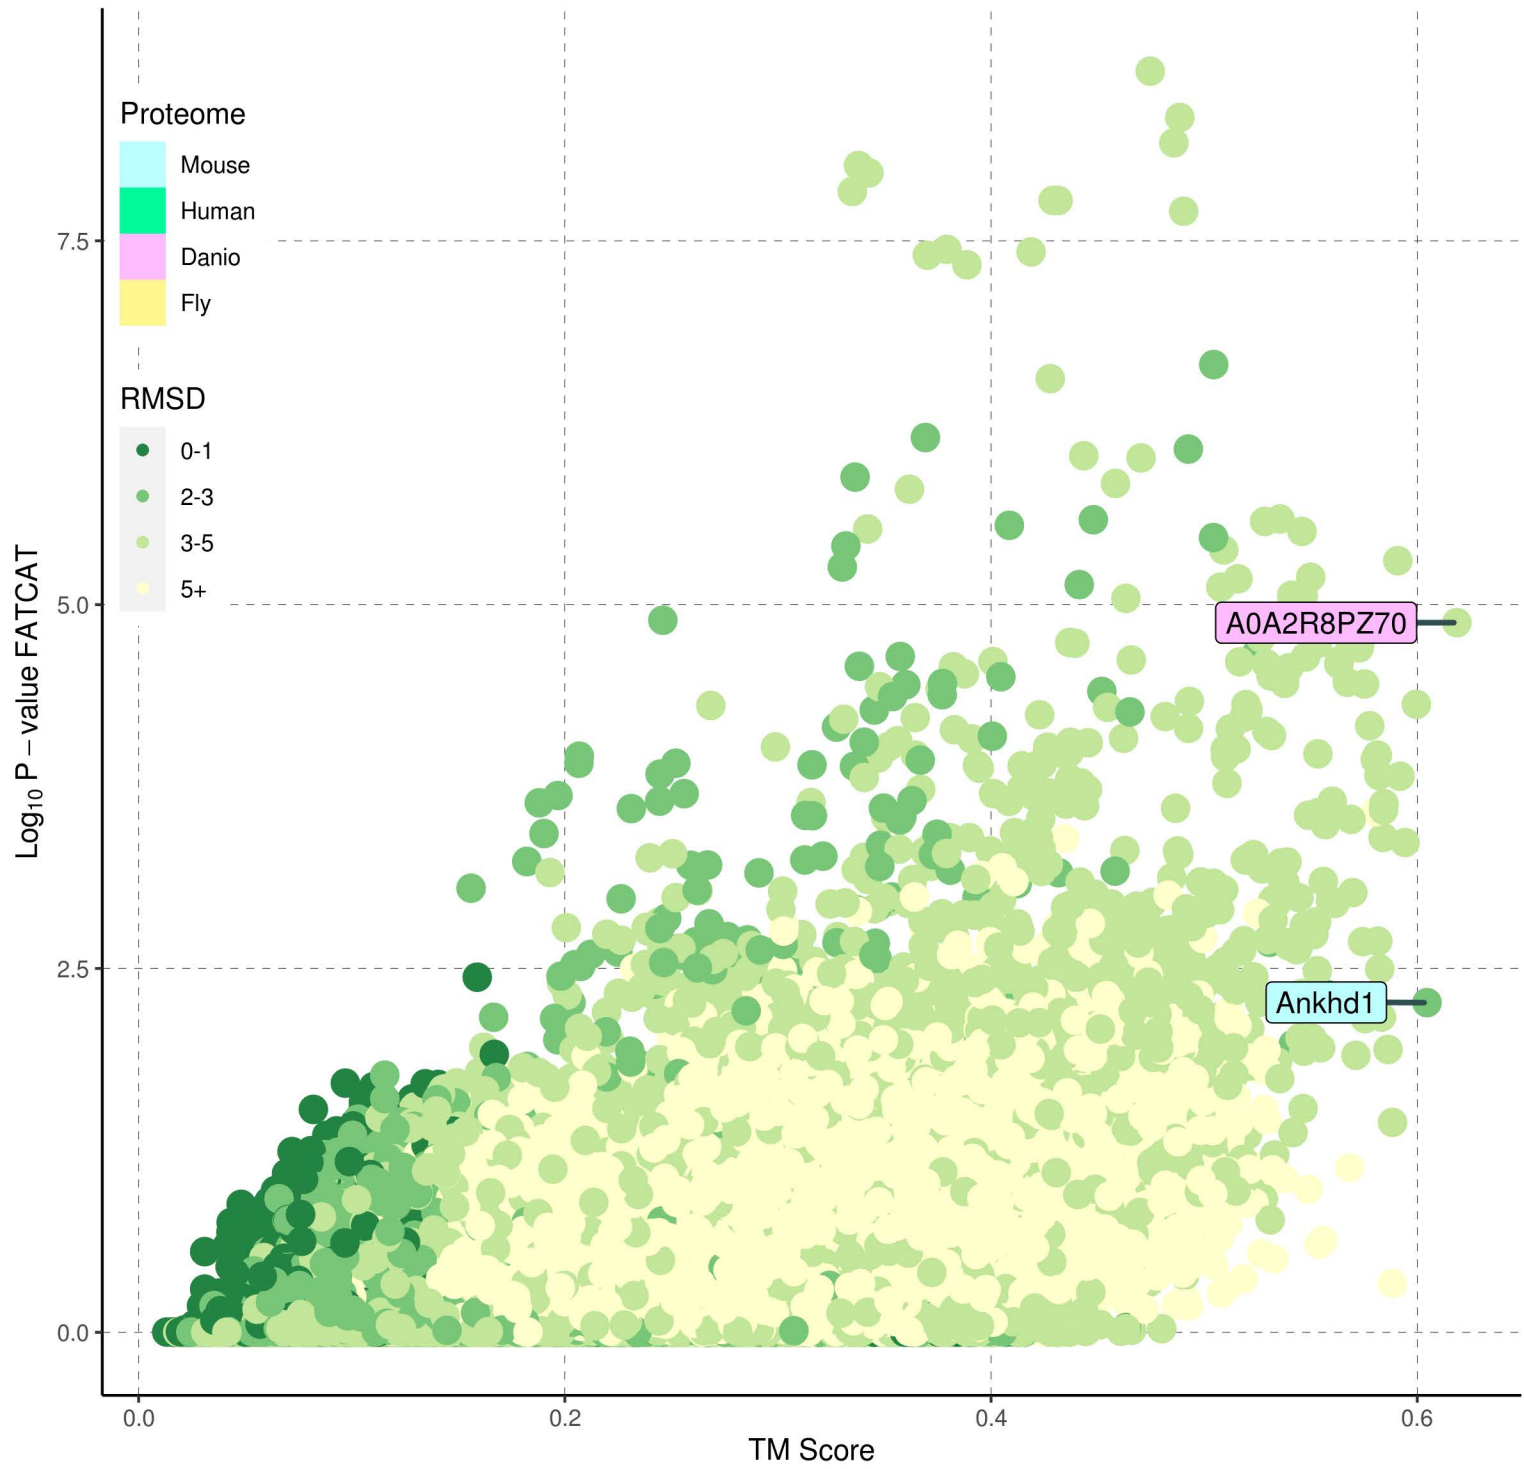

B19 : No hits, top-scoring values are indicated

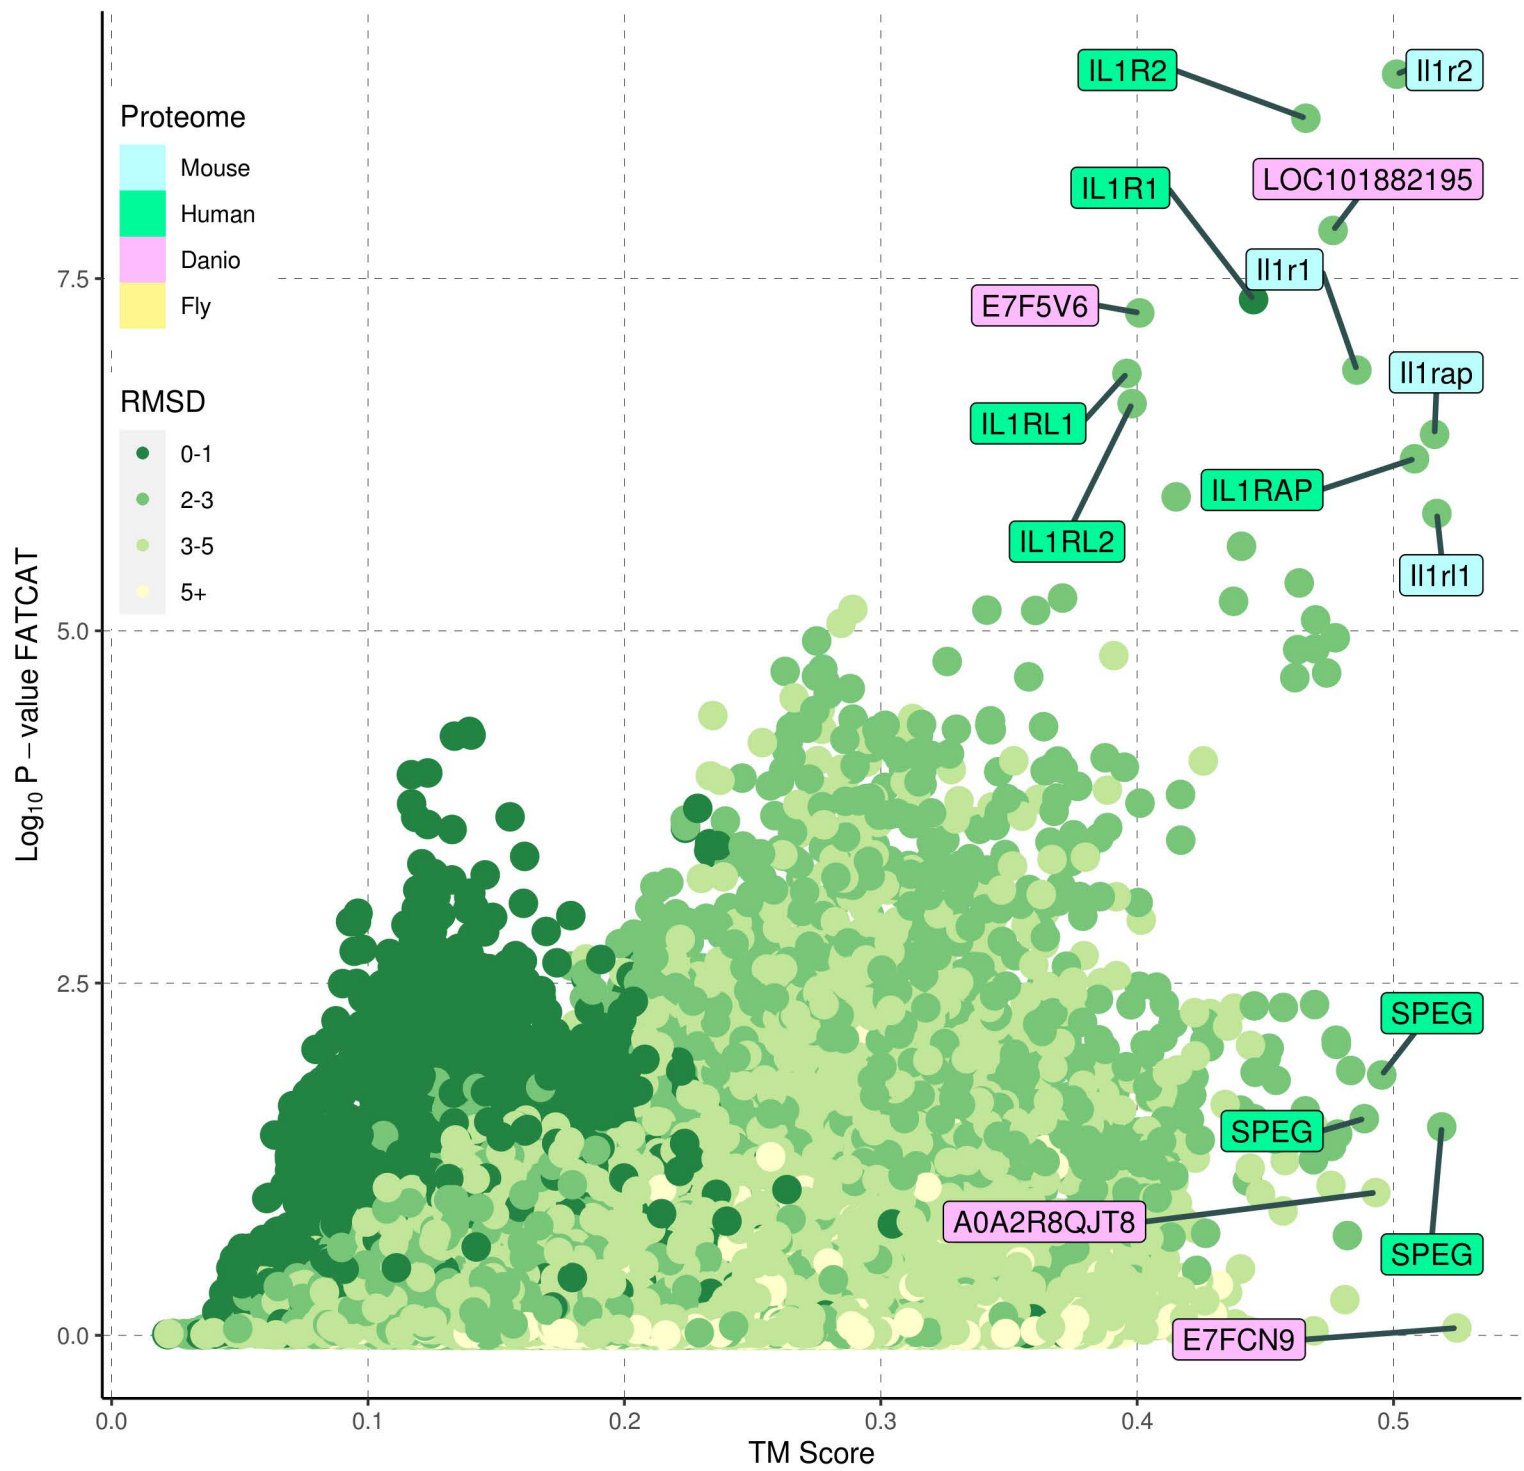

B20 : No hits, top-scoring values are indicated

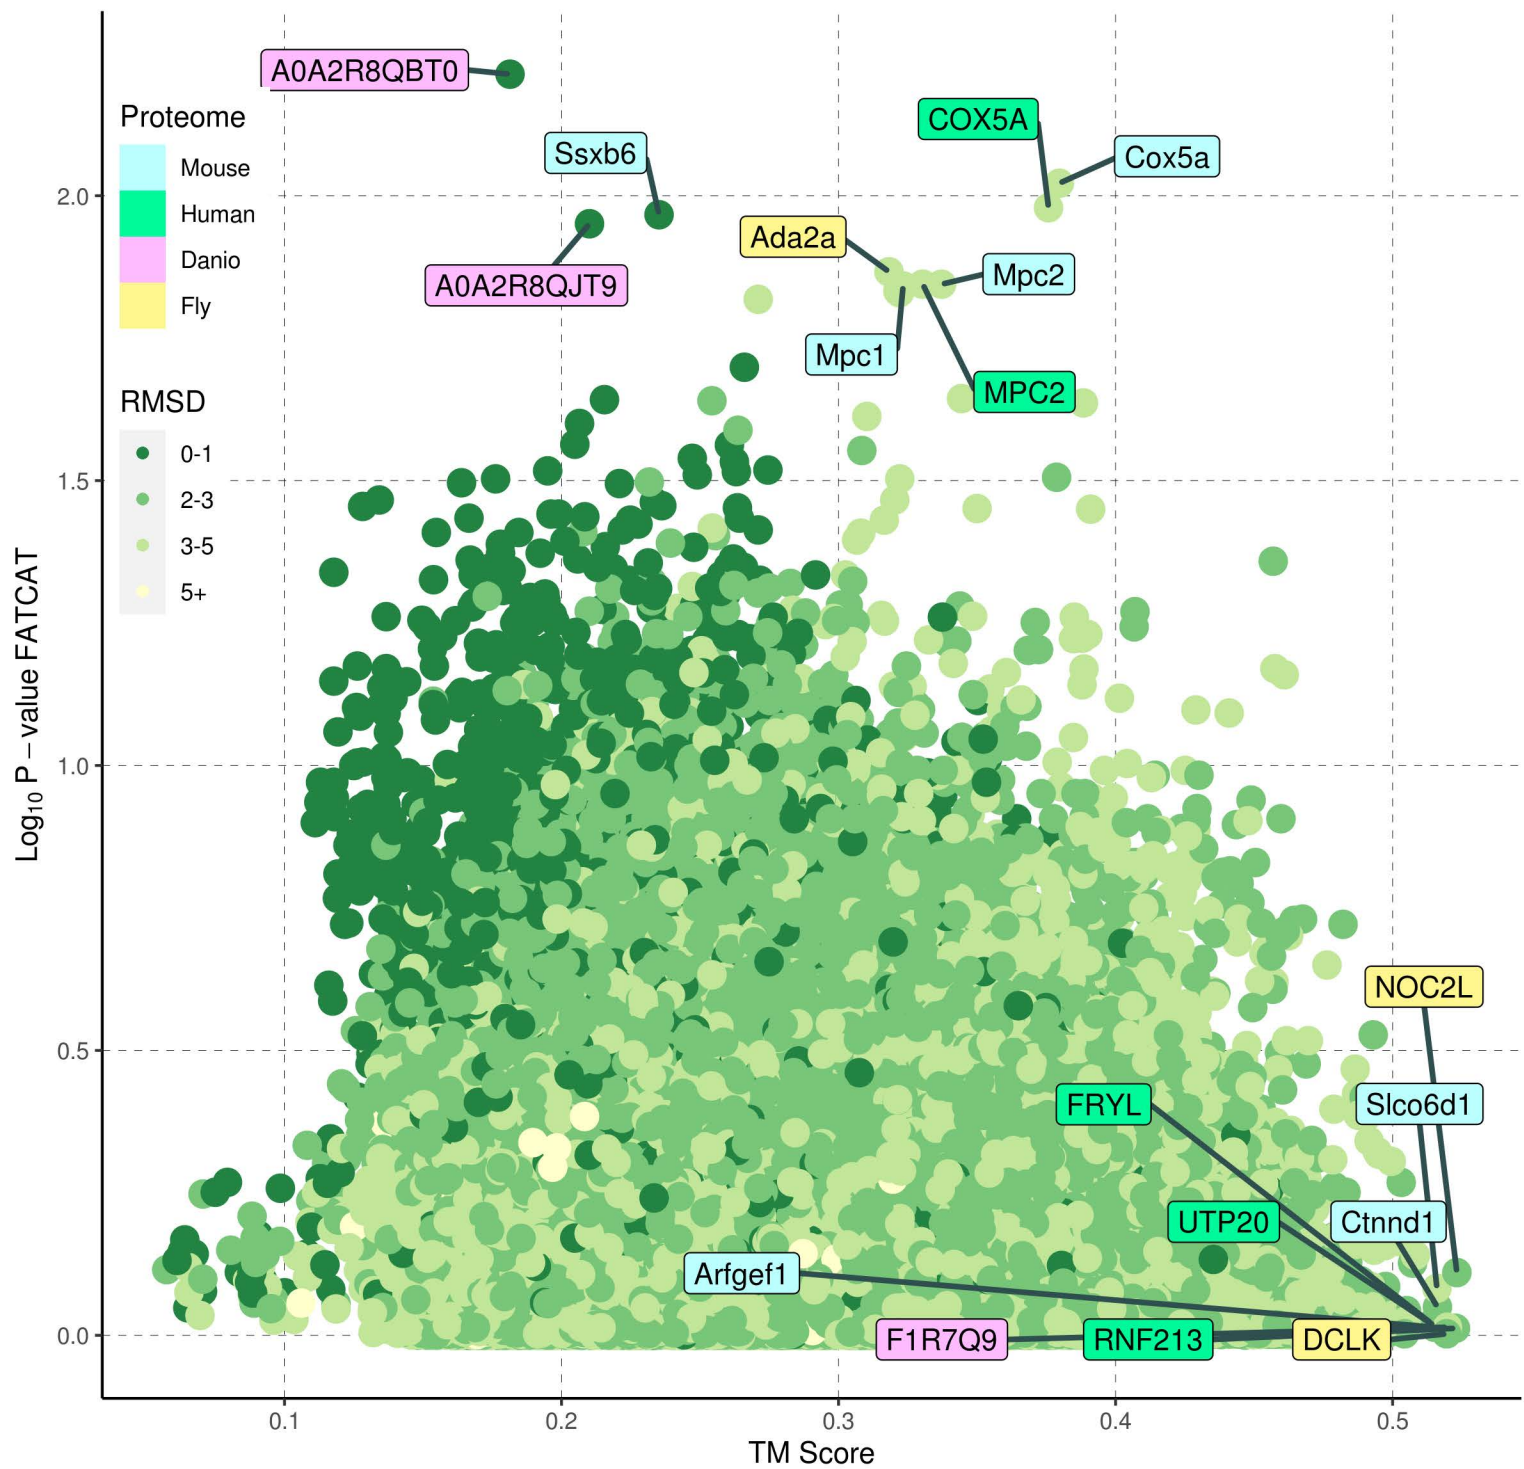



## B21

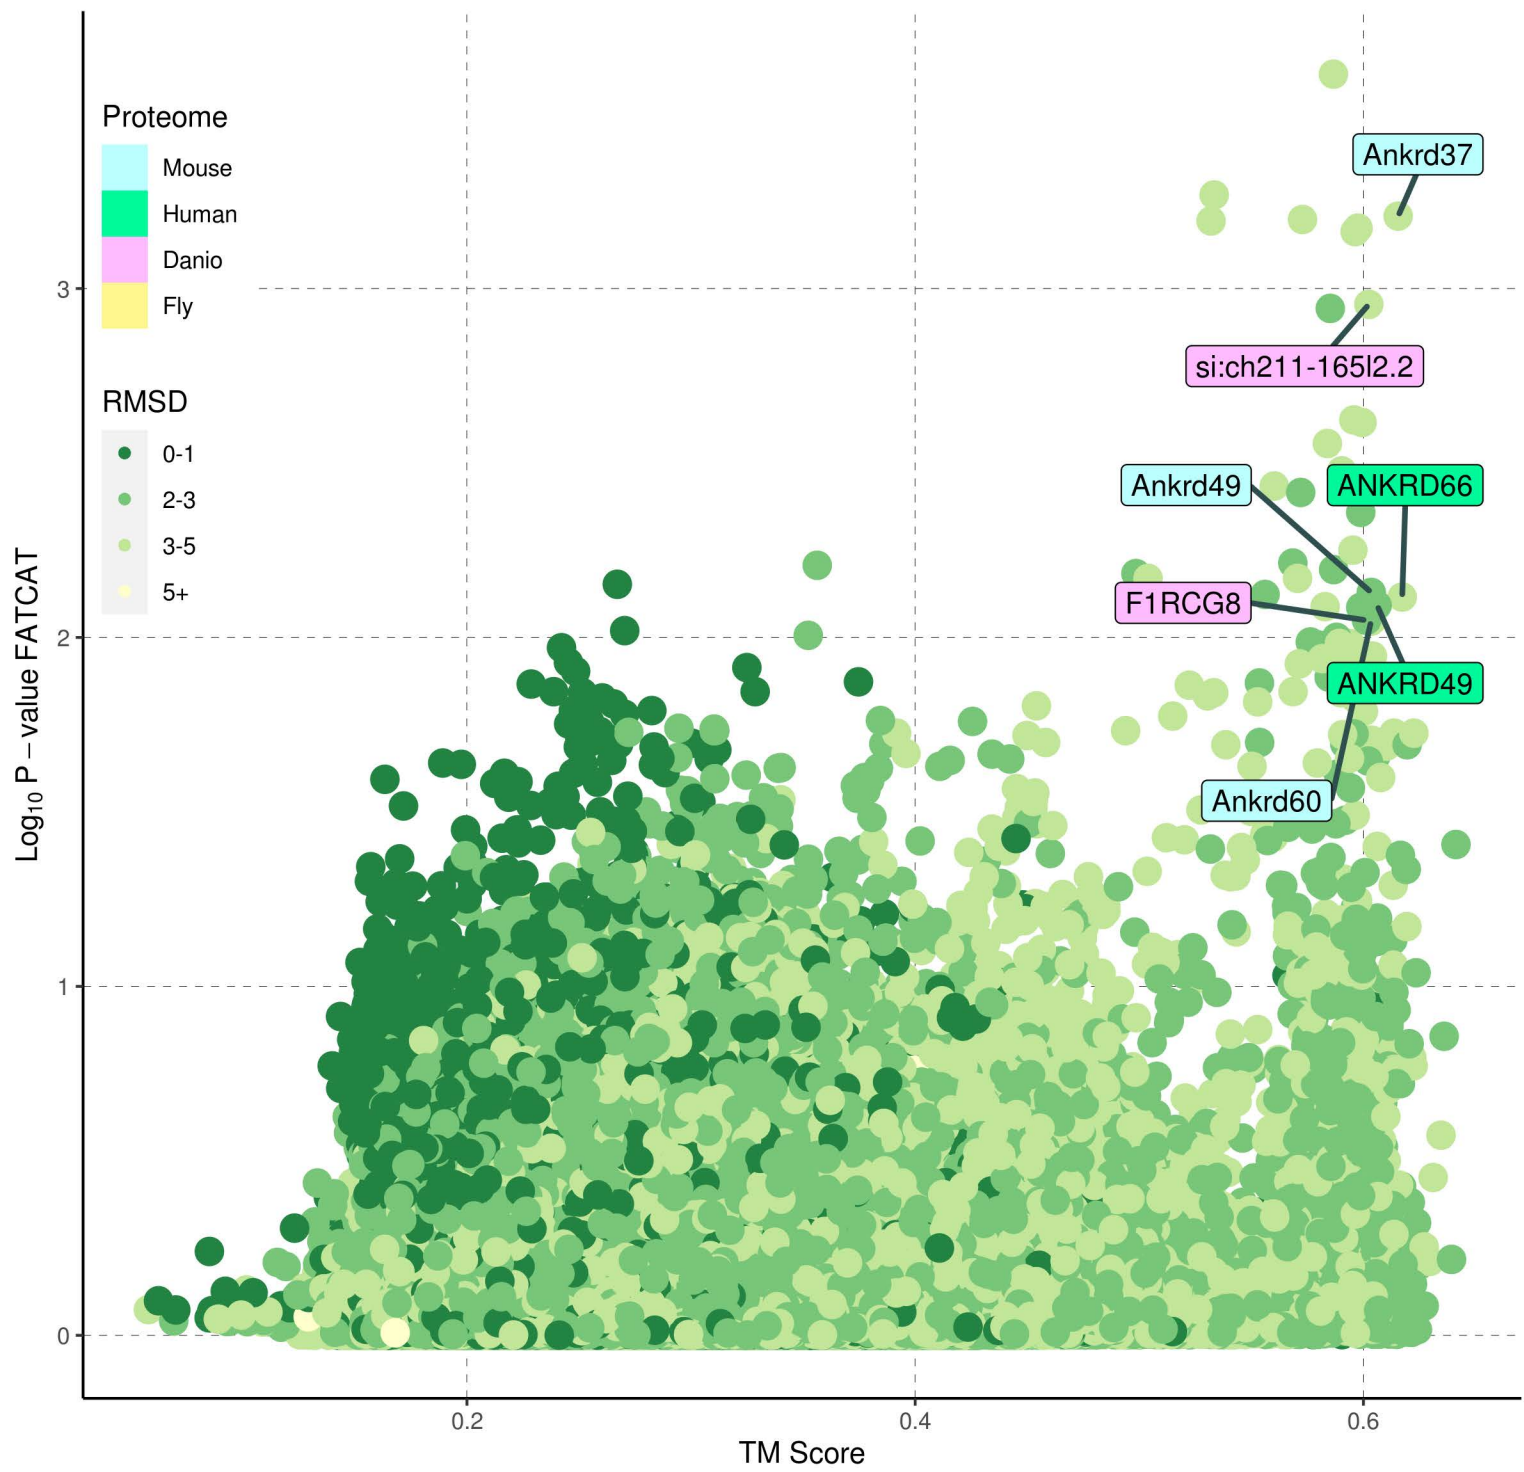

B22 : No hits, top-scoring values are indicated

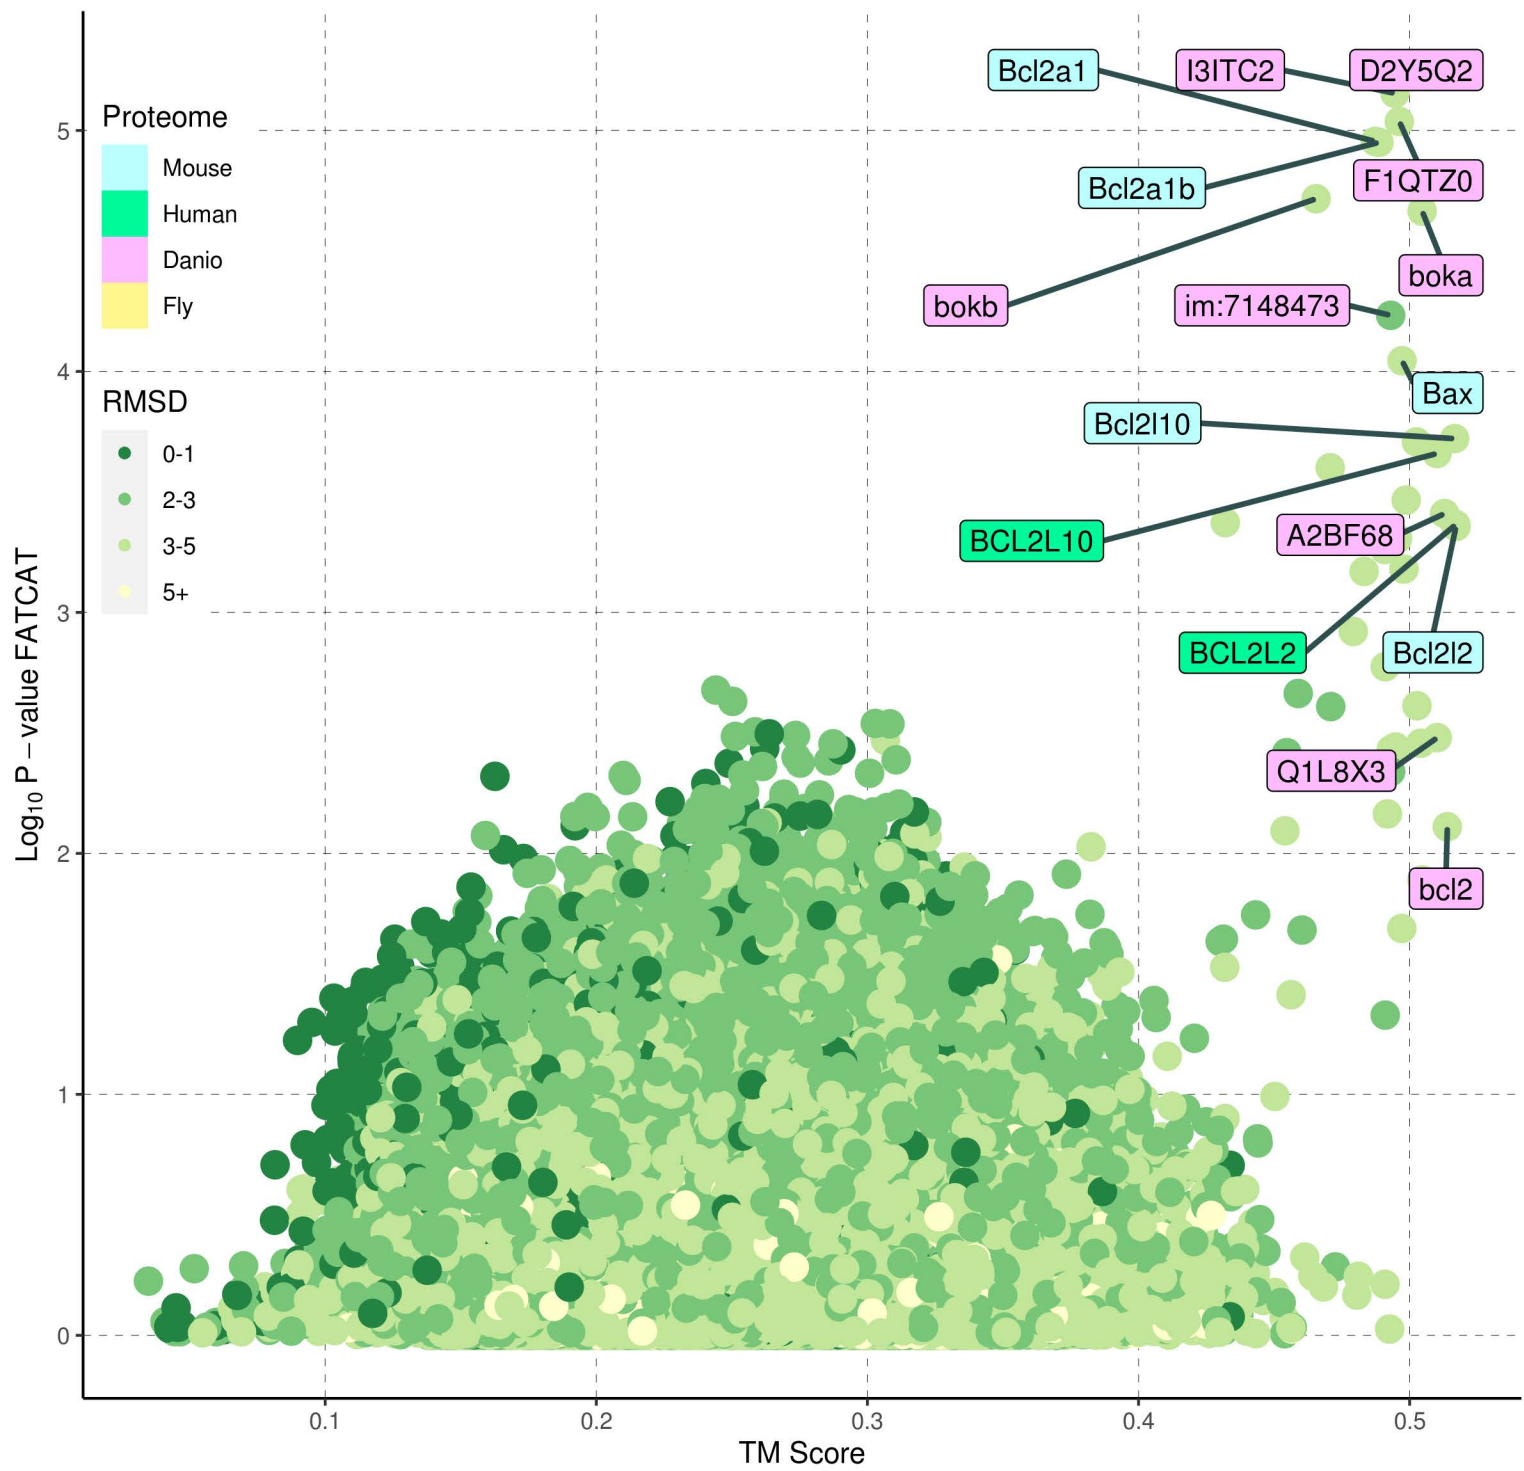





## B25

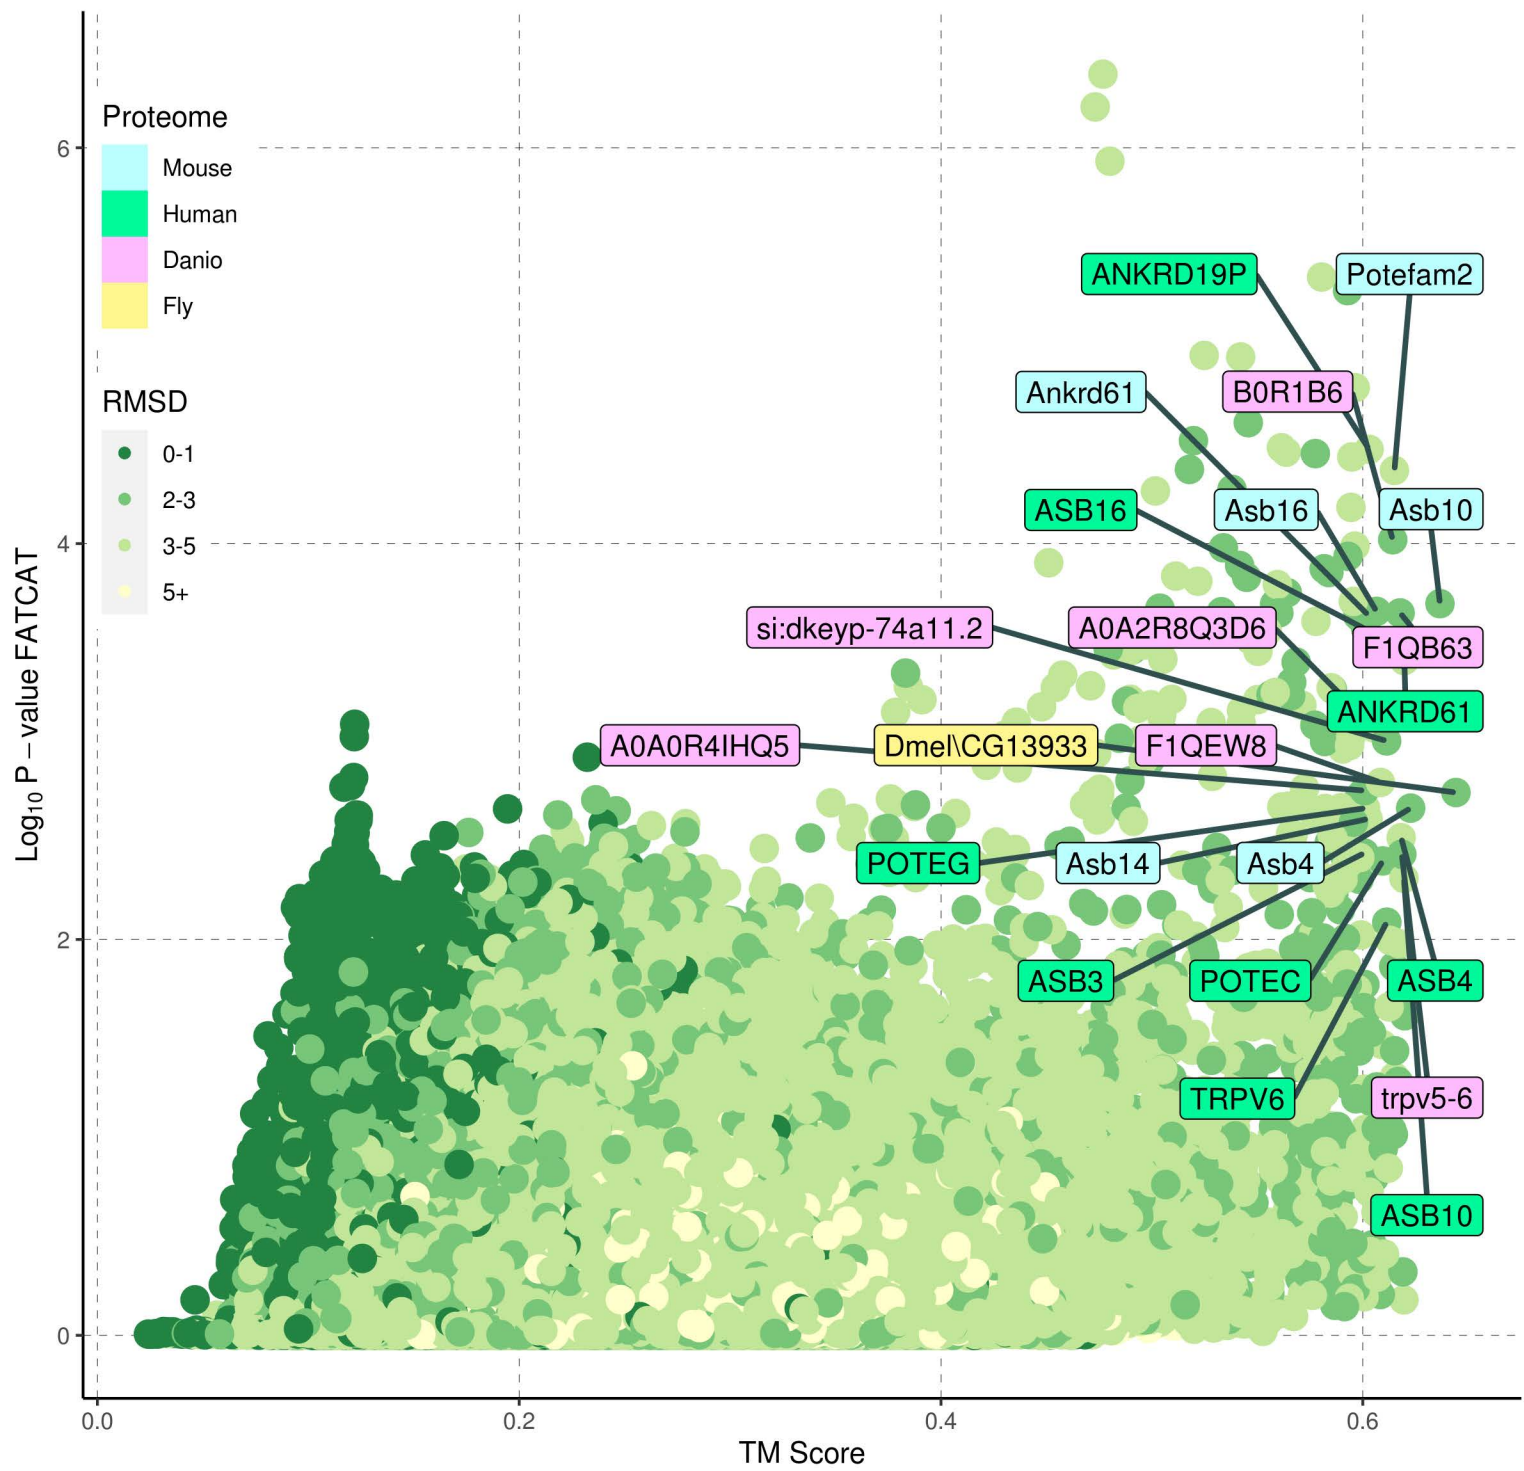

## B26

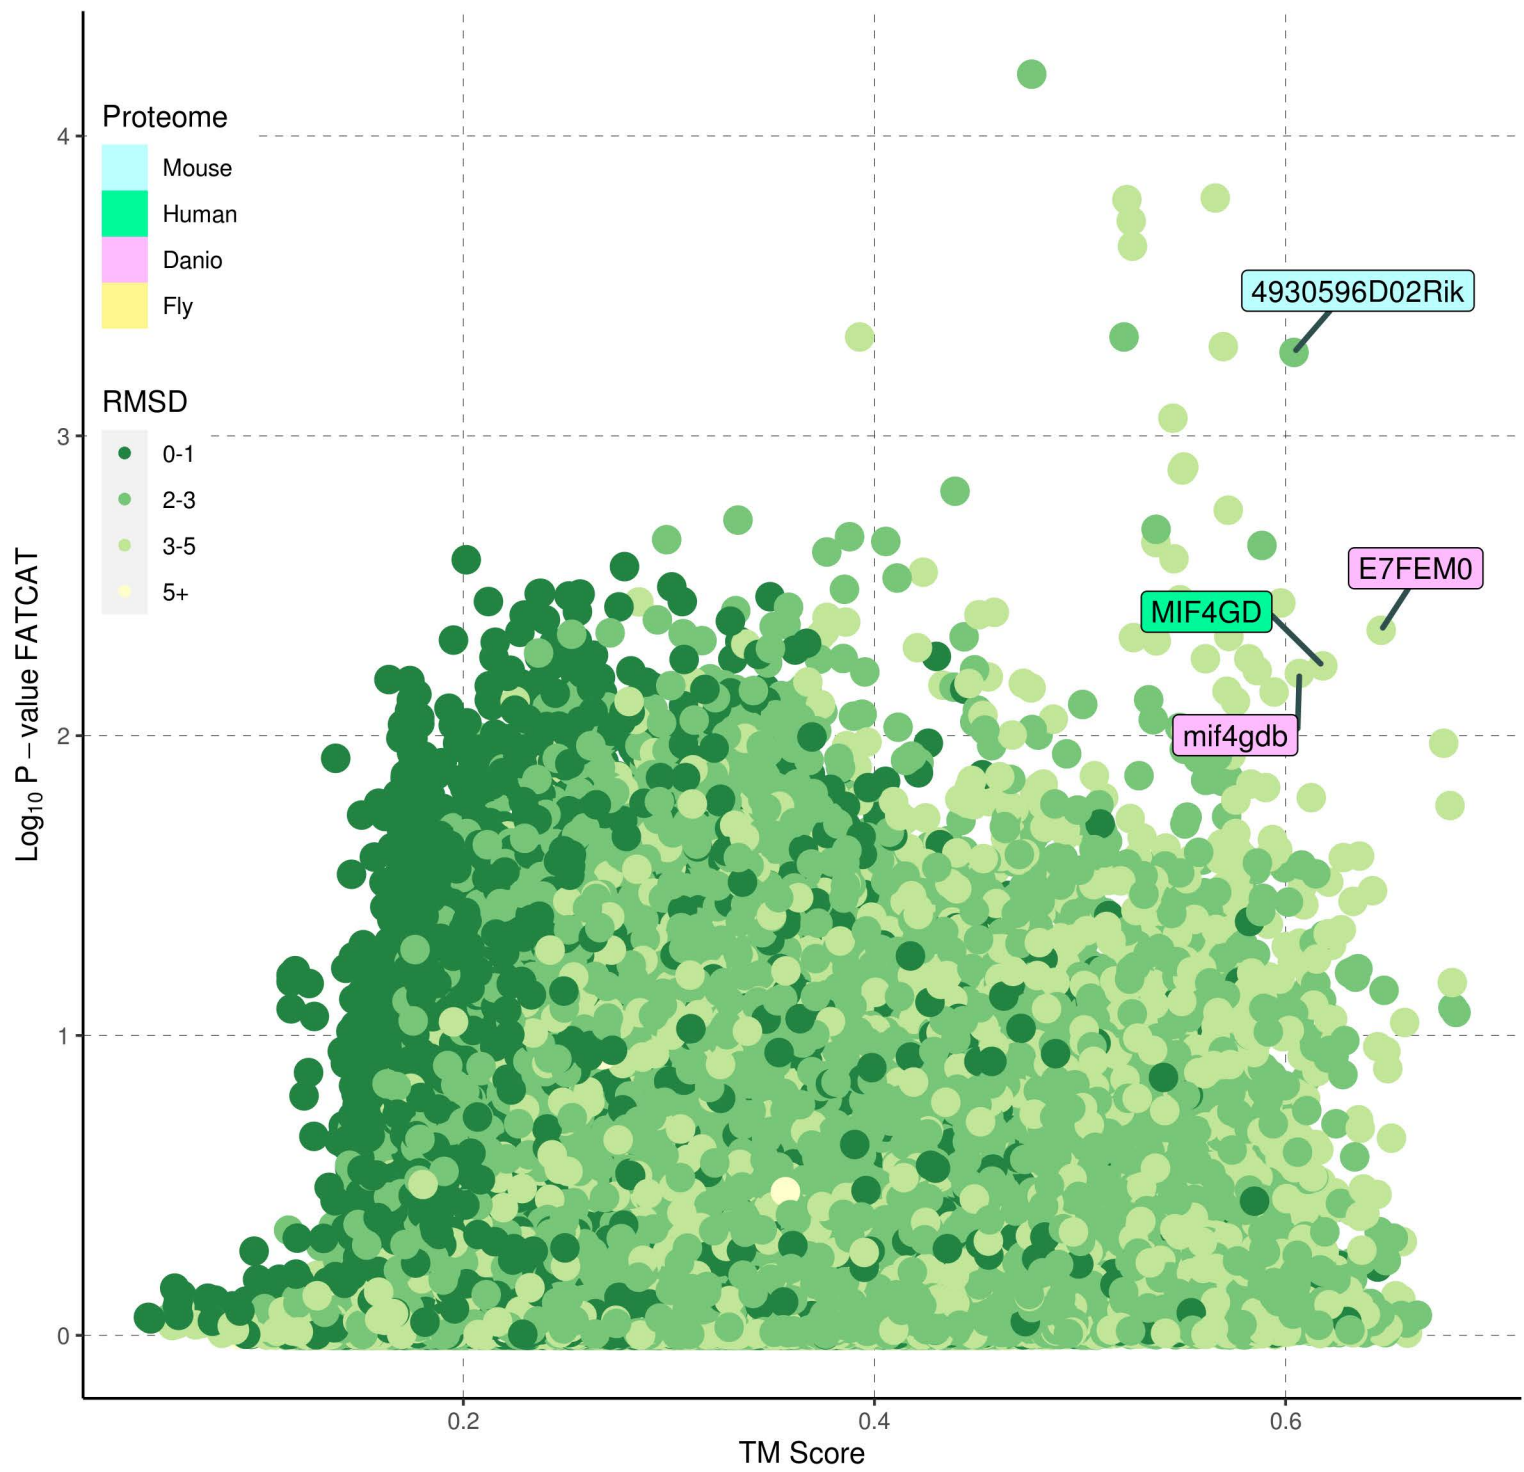

B27 : No hits, top-scoring values are indicated

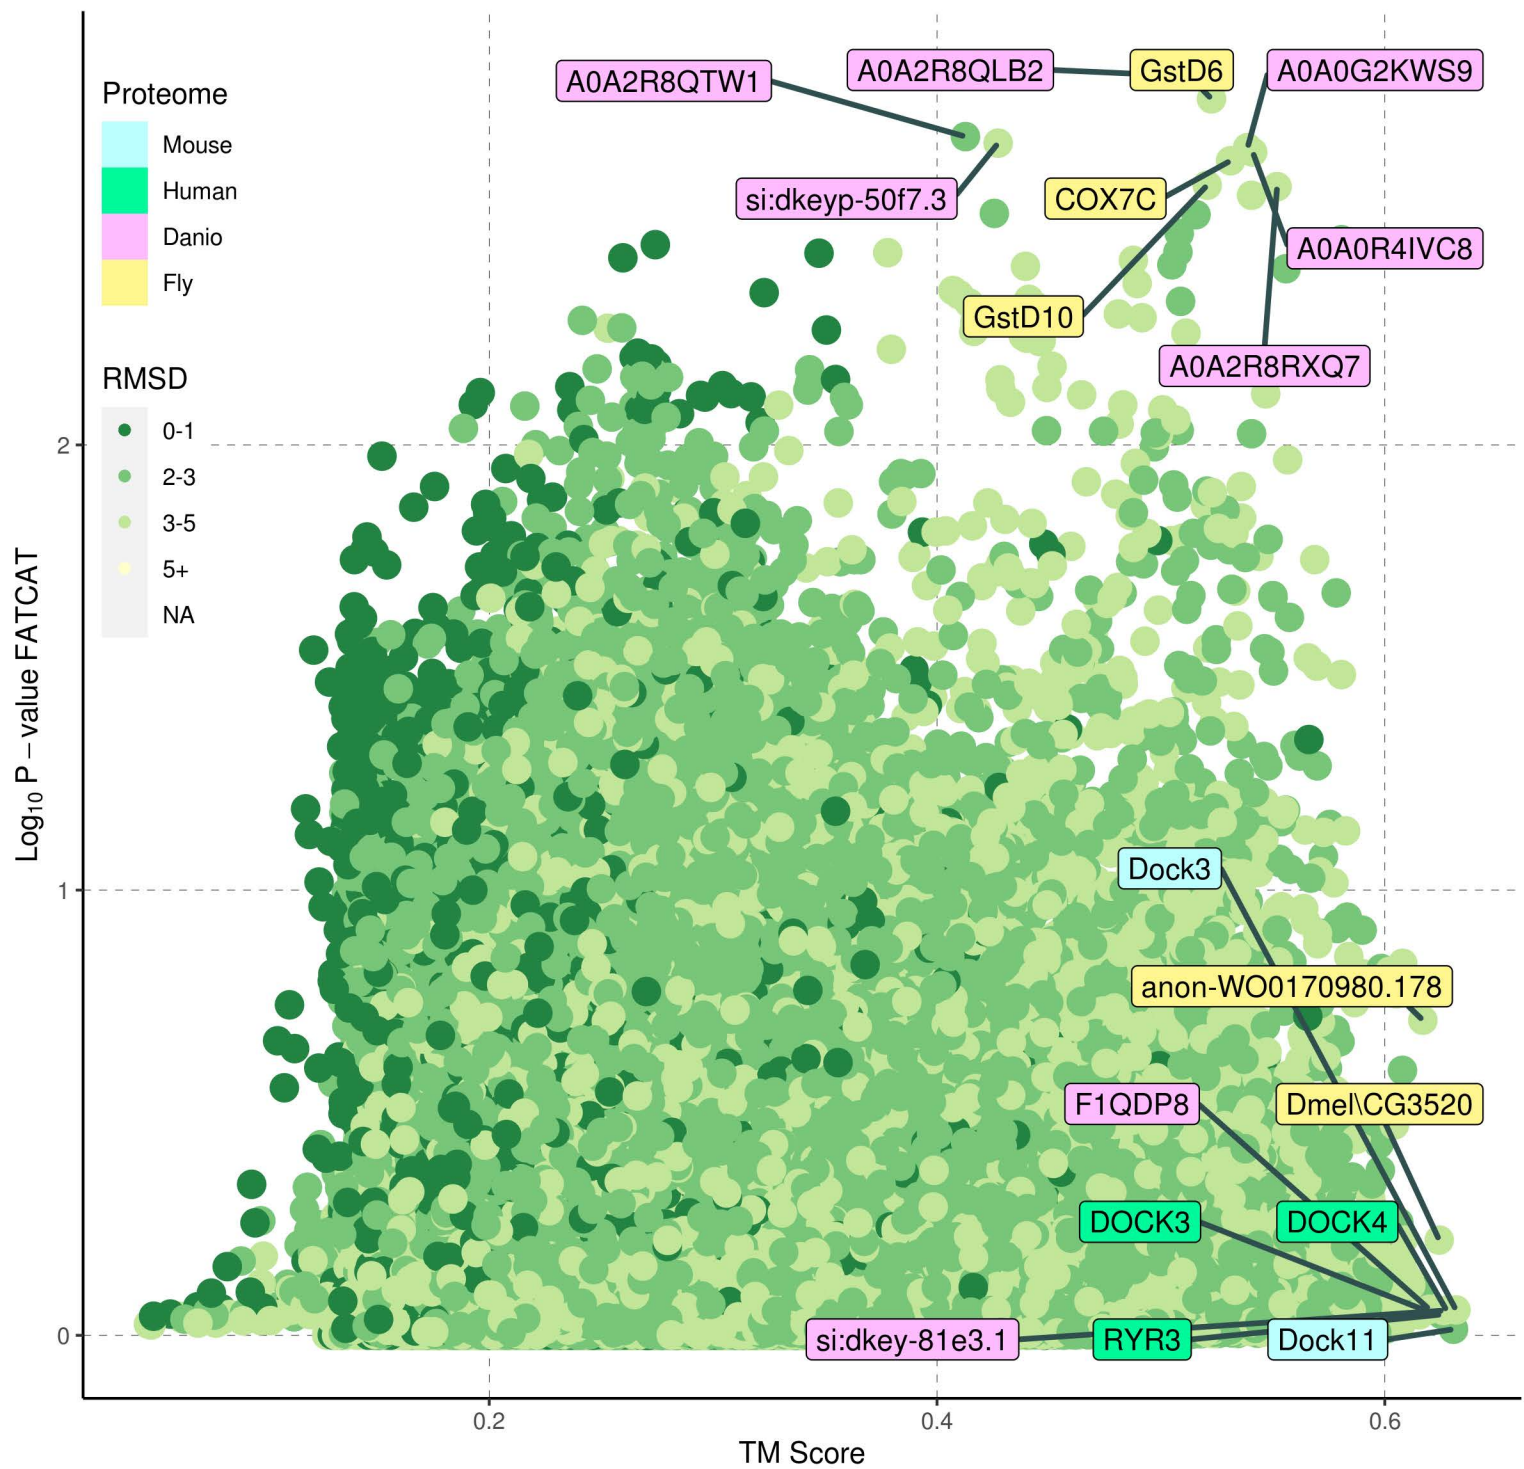

B28 : No hits, top-scoring values are indicated

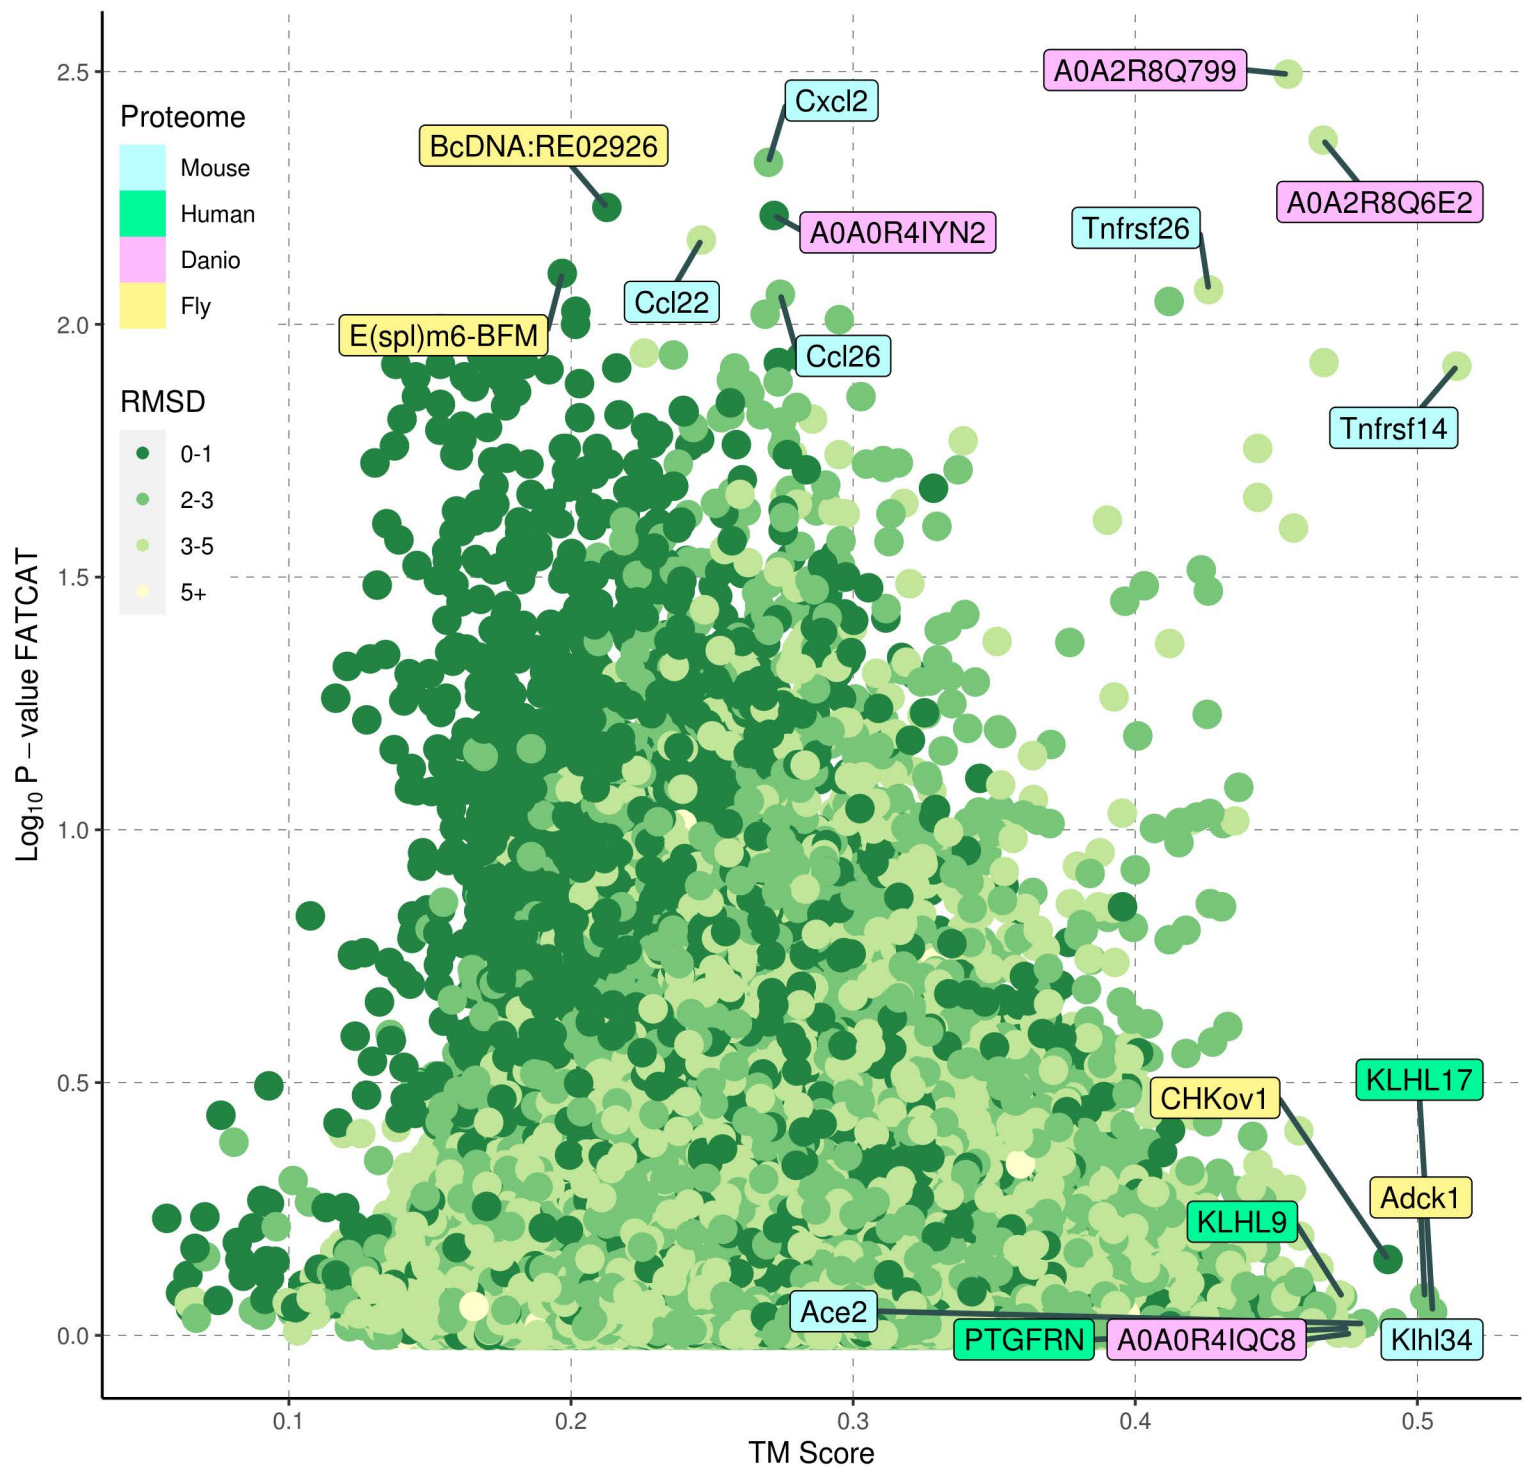



BorfA : No hits, top-scoring values are indicated

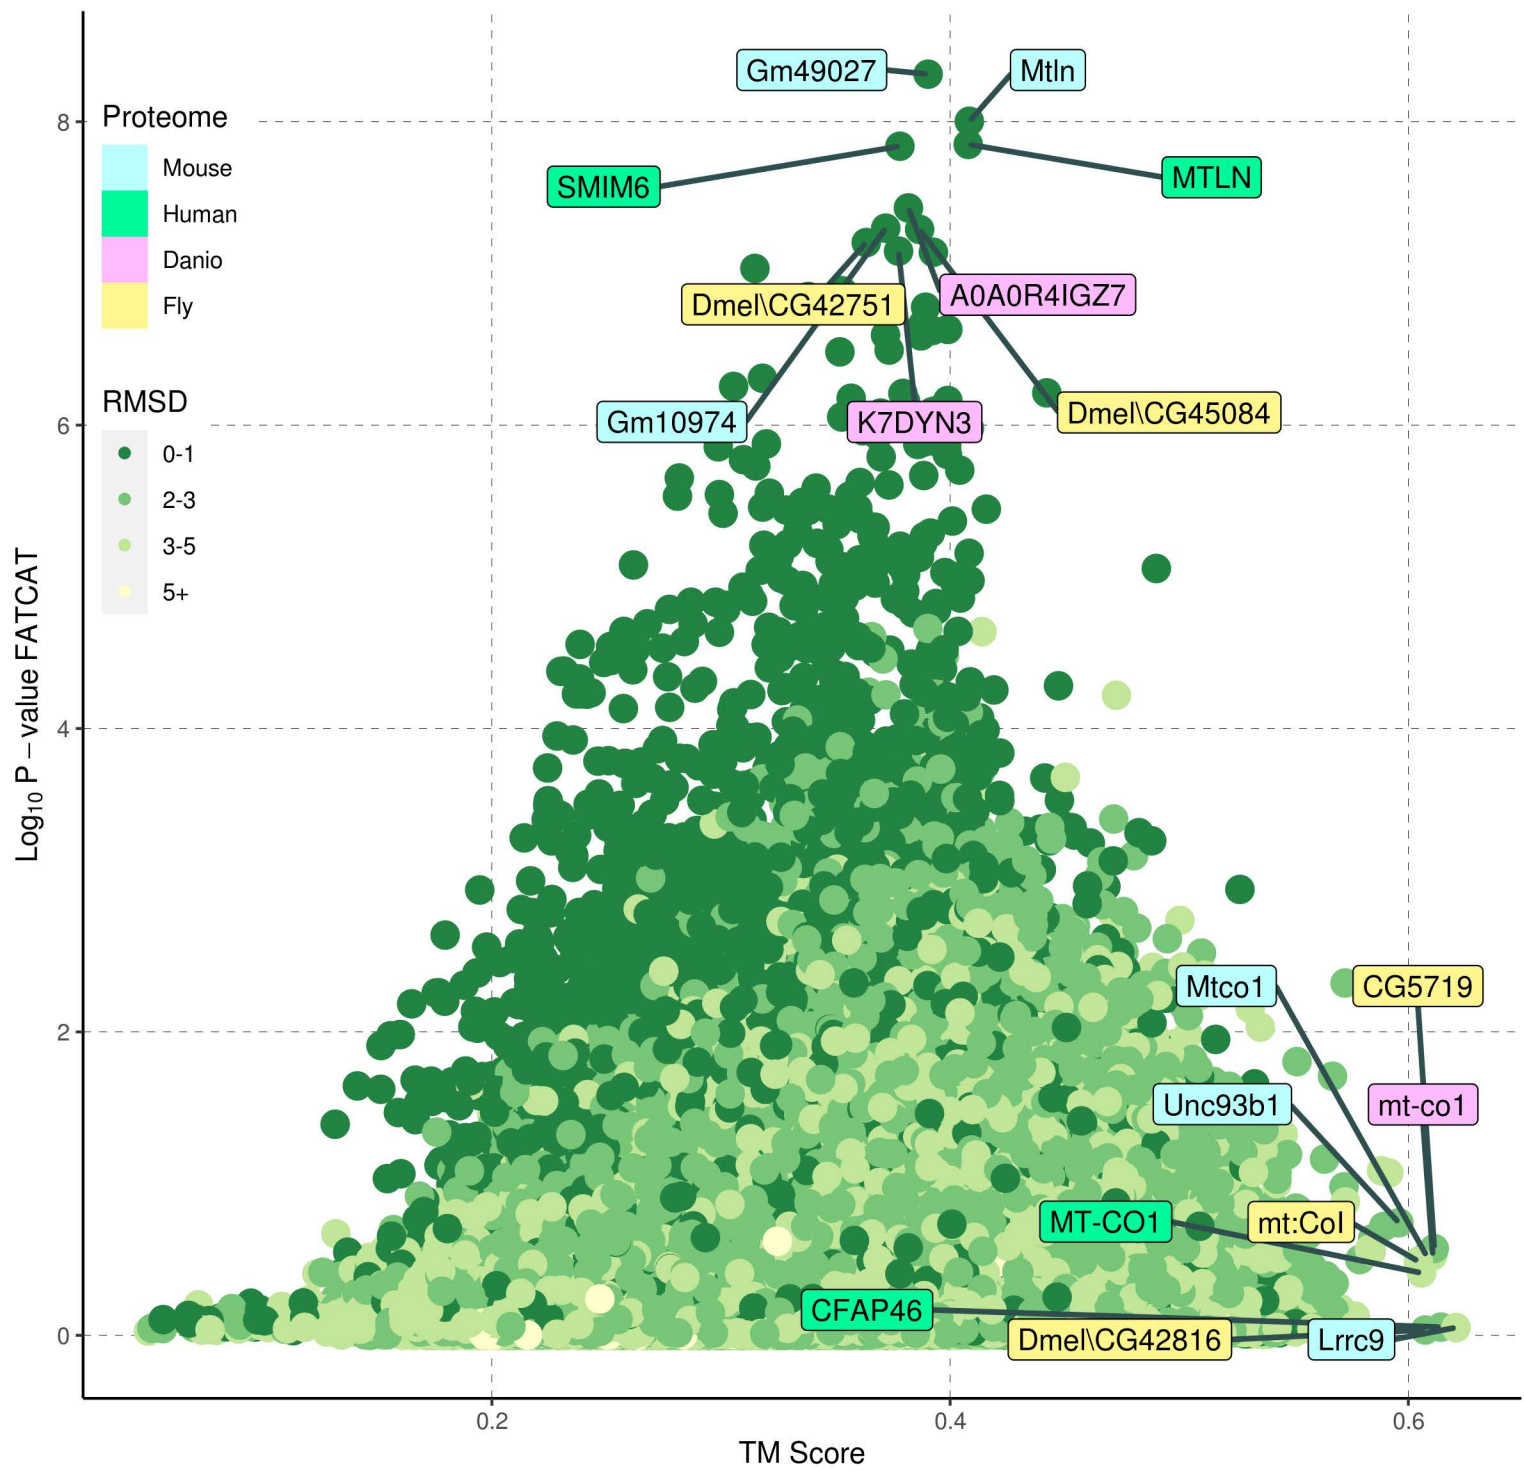

BorfB : No hits, top-scoring values are indicated

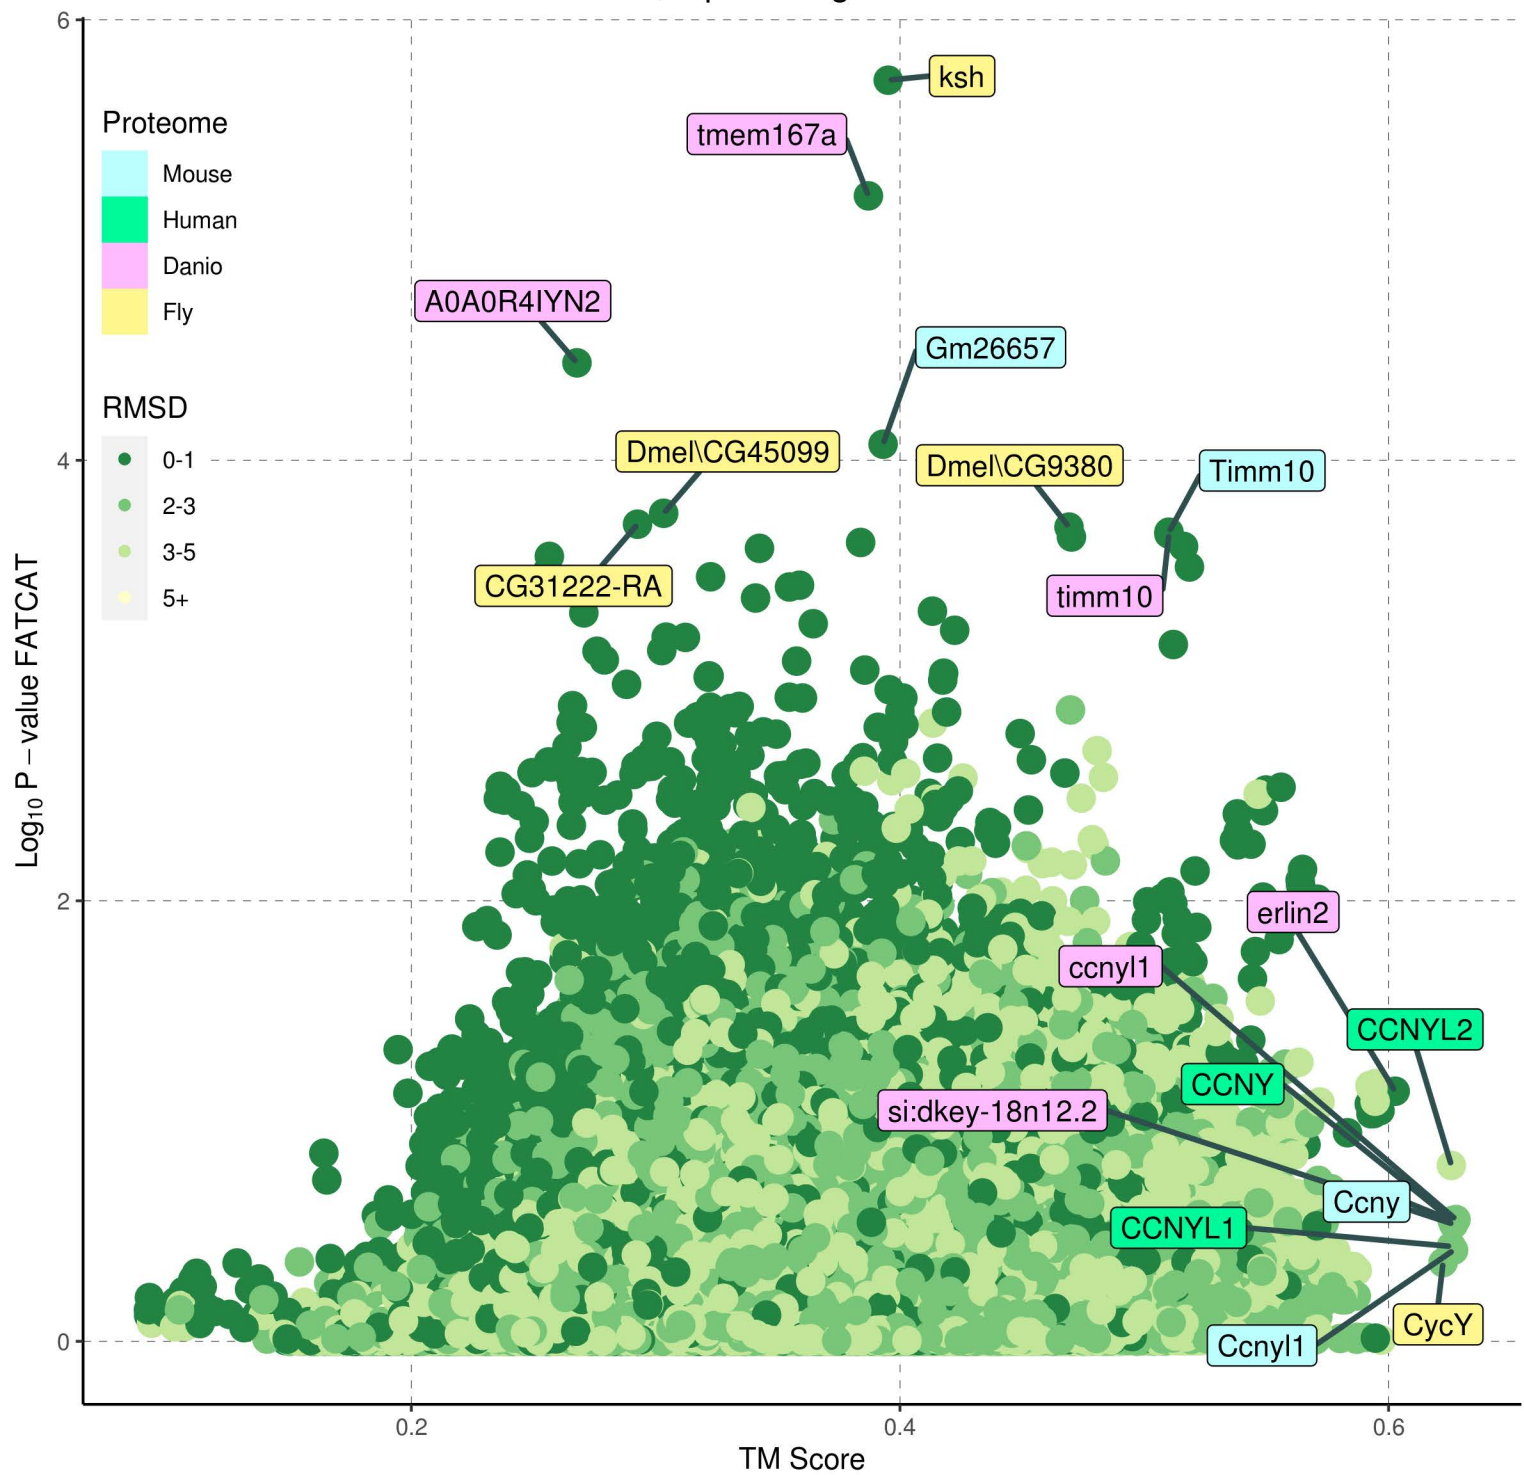

BorfC : No hits, top-scoring values are indicated

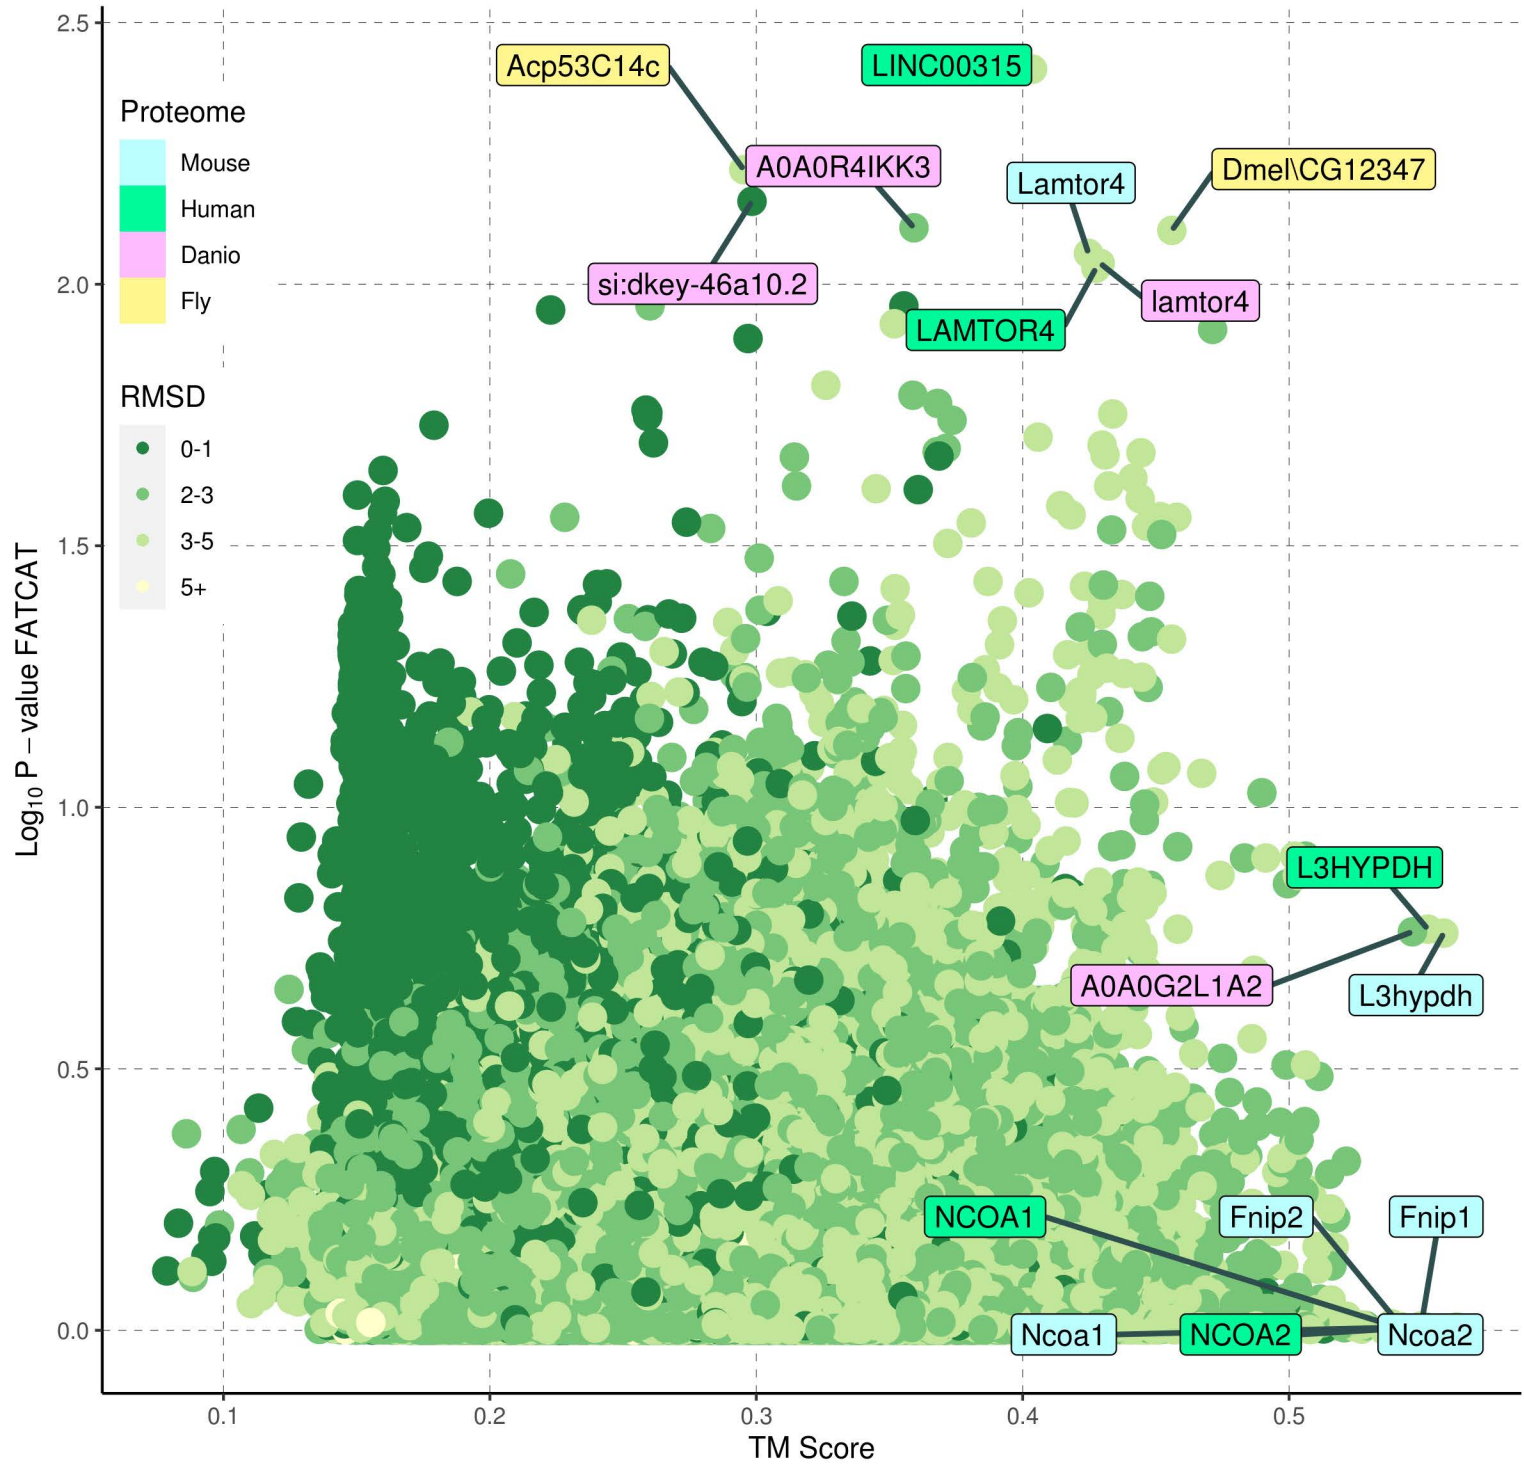

## BorfD

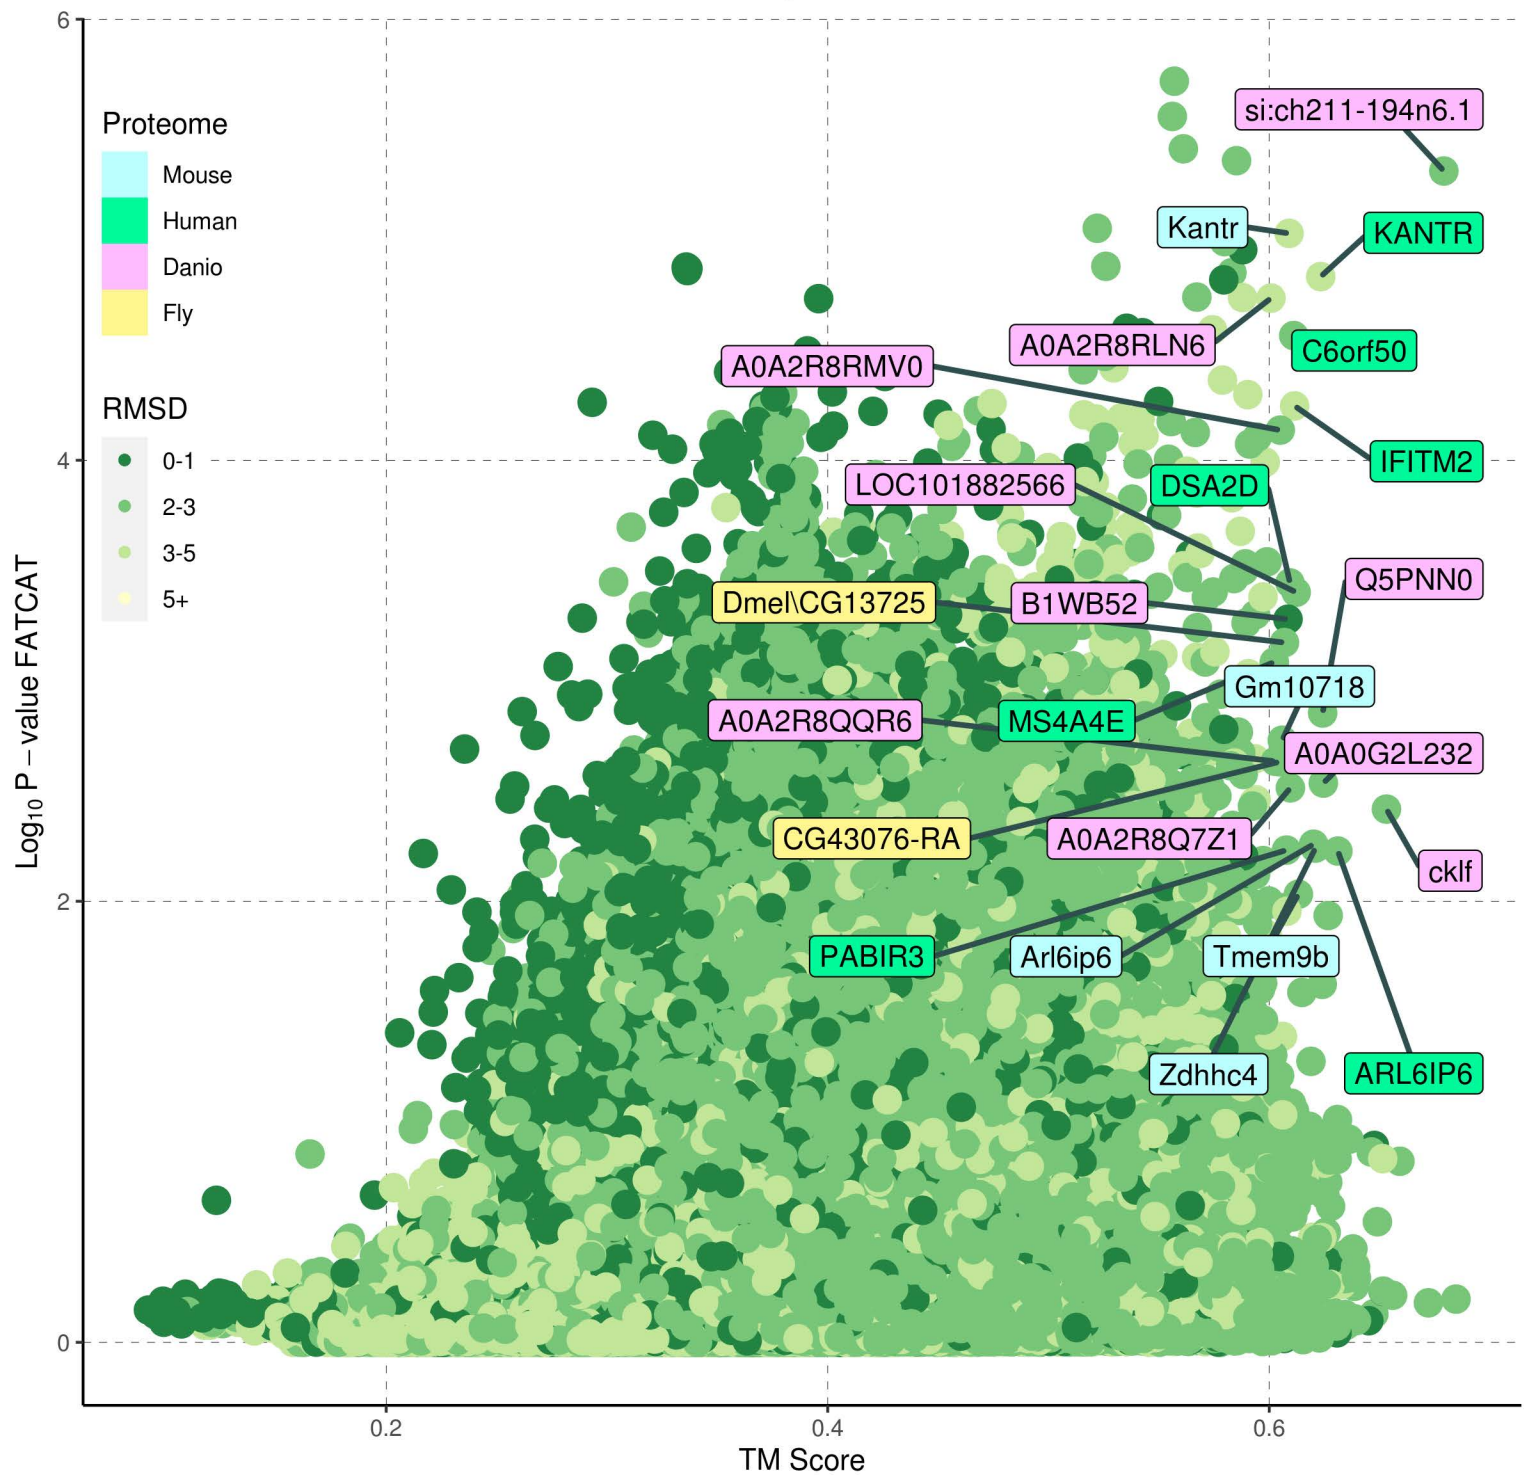

BorfE : No hits, top-scoring values are indicated

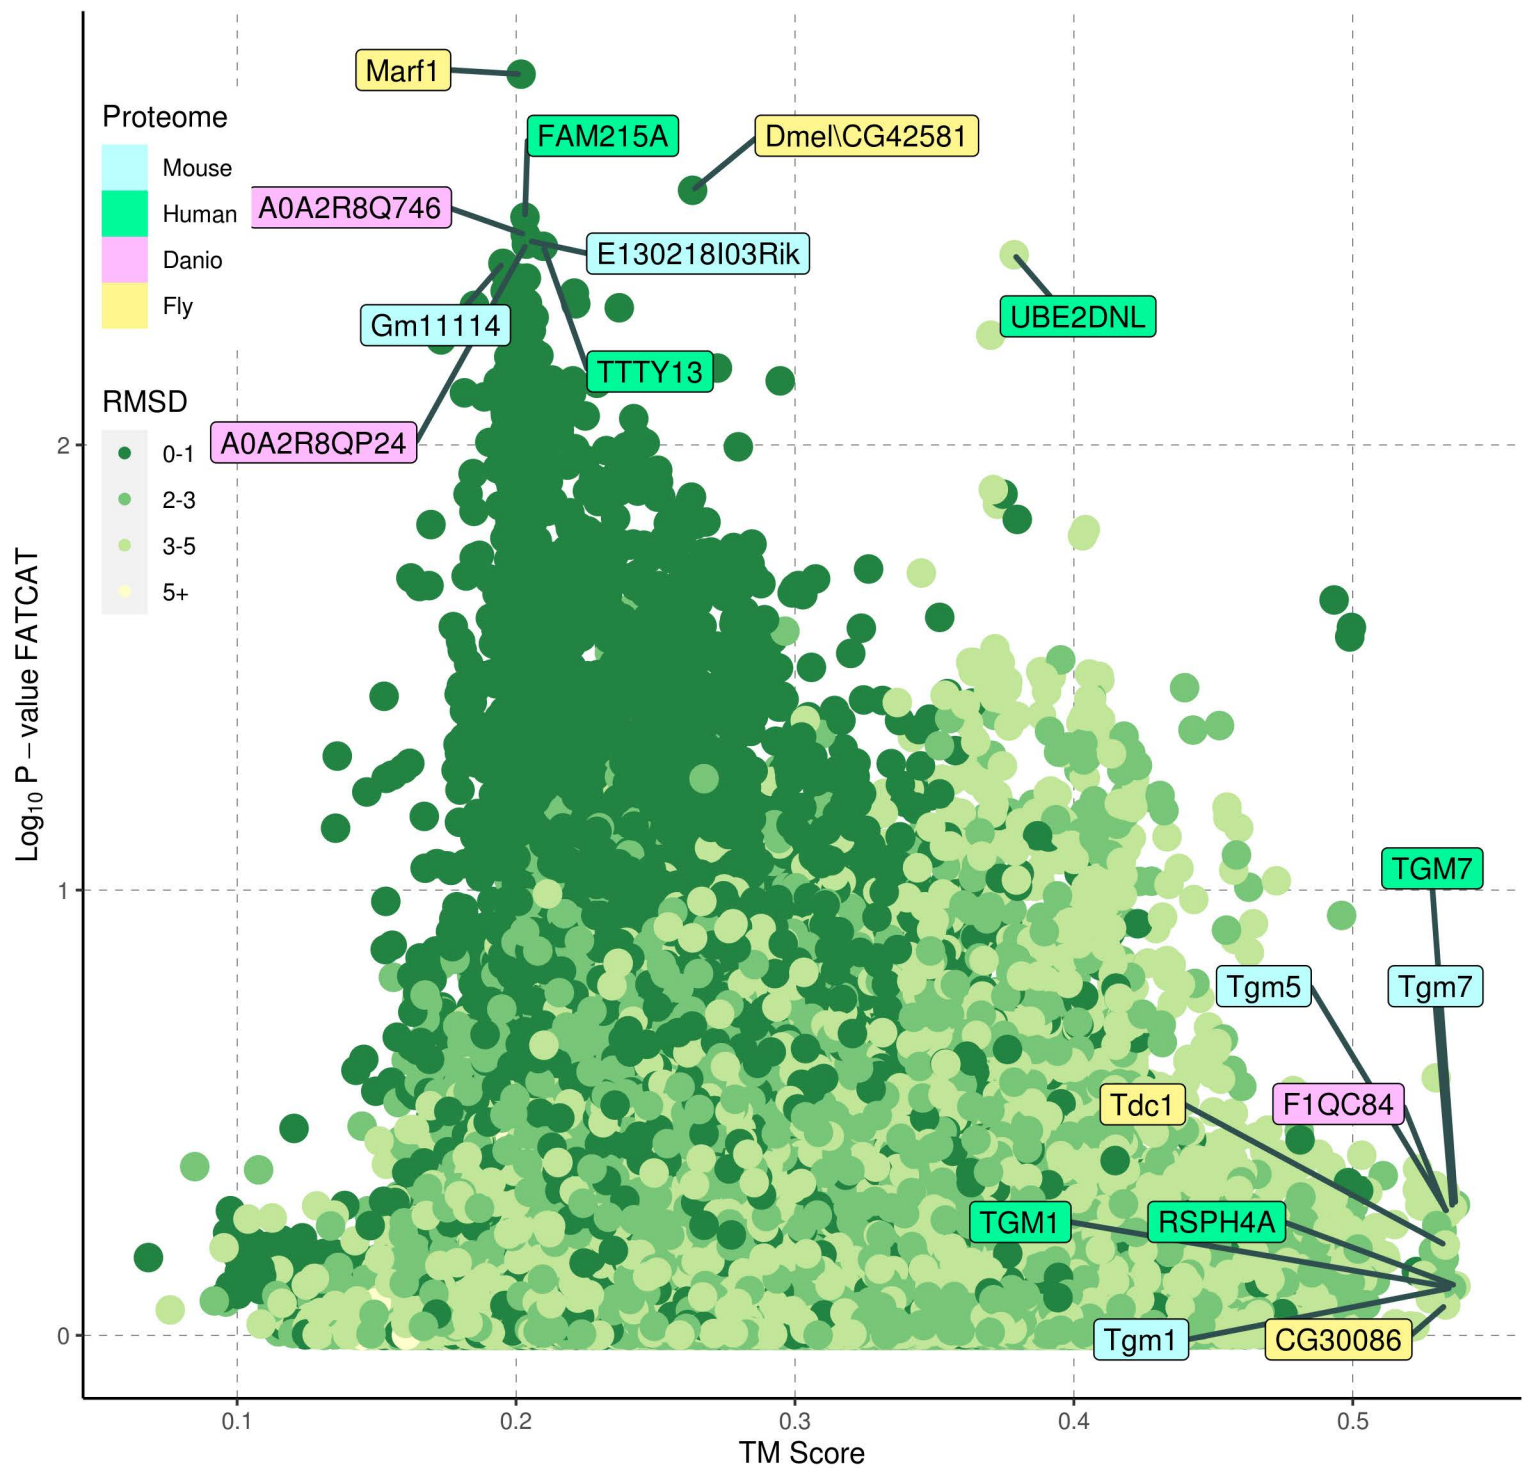

Borrf : No hits, top-scoring values are indicated

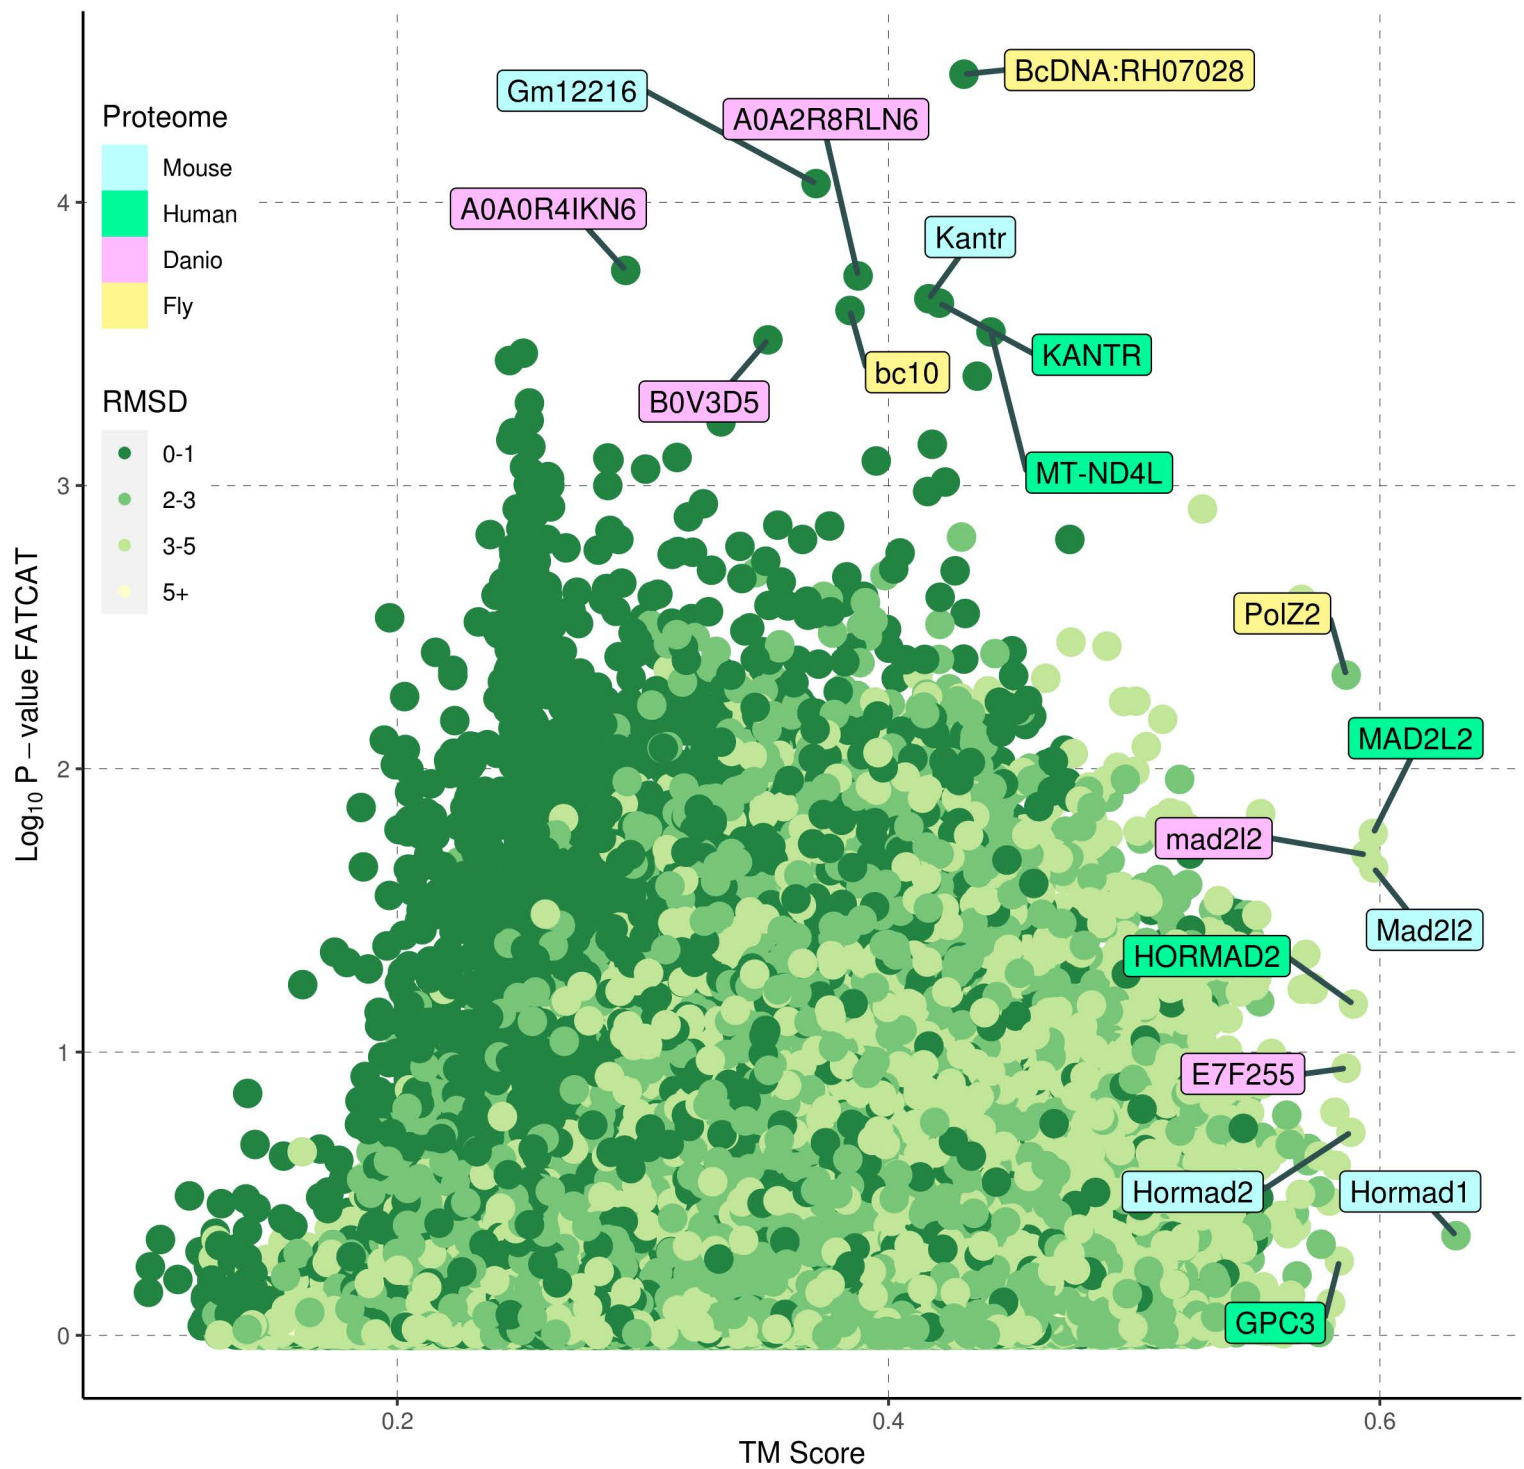

# BorfG

Log<sub>10</sub> P-value FATCAT

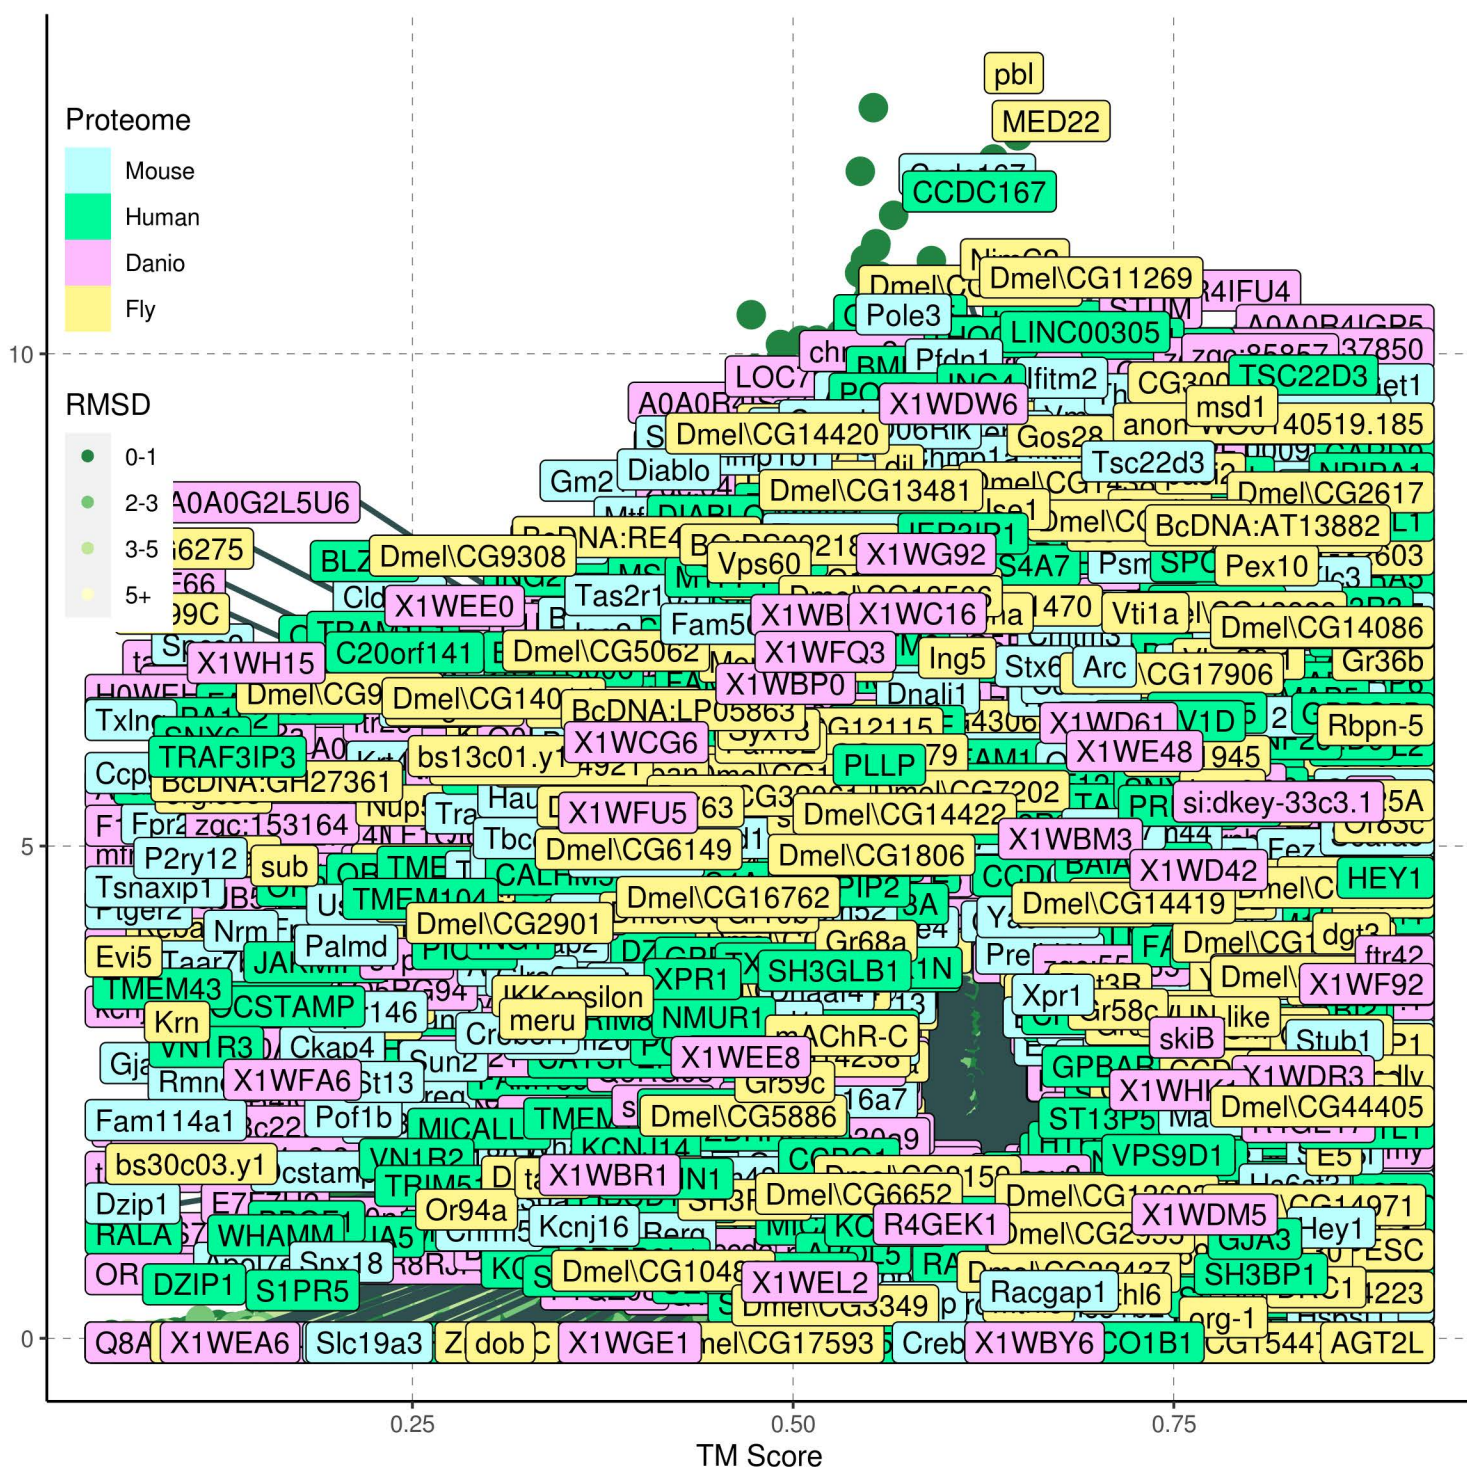

BorfH : No hits, top-scoring values are indicated

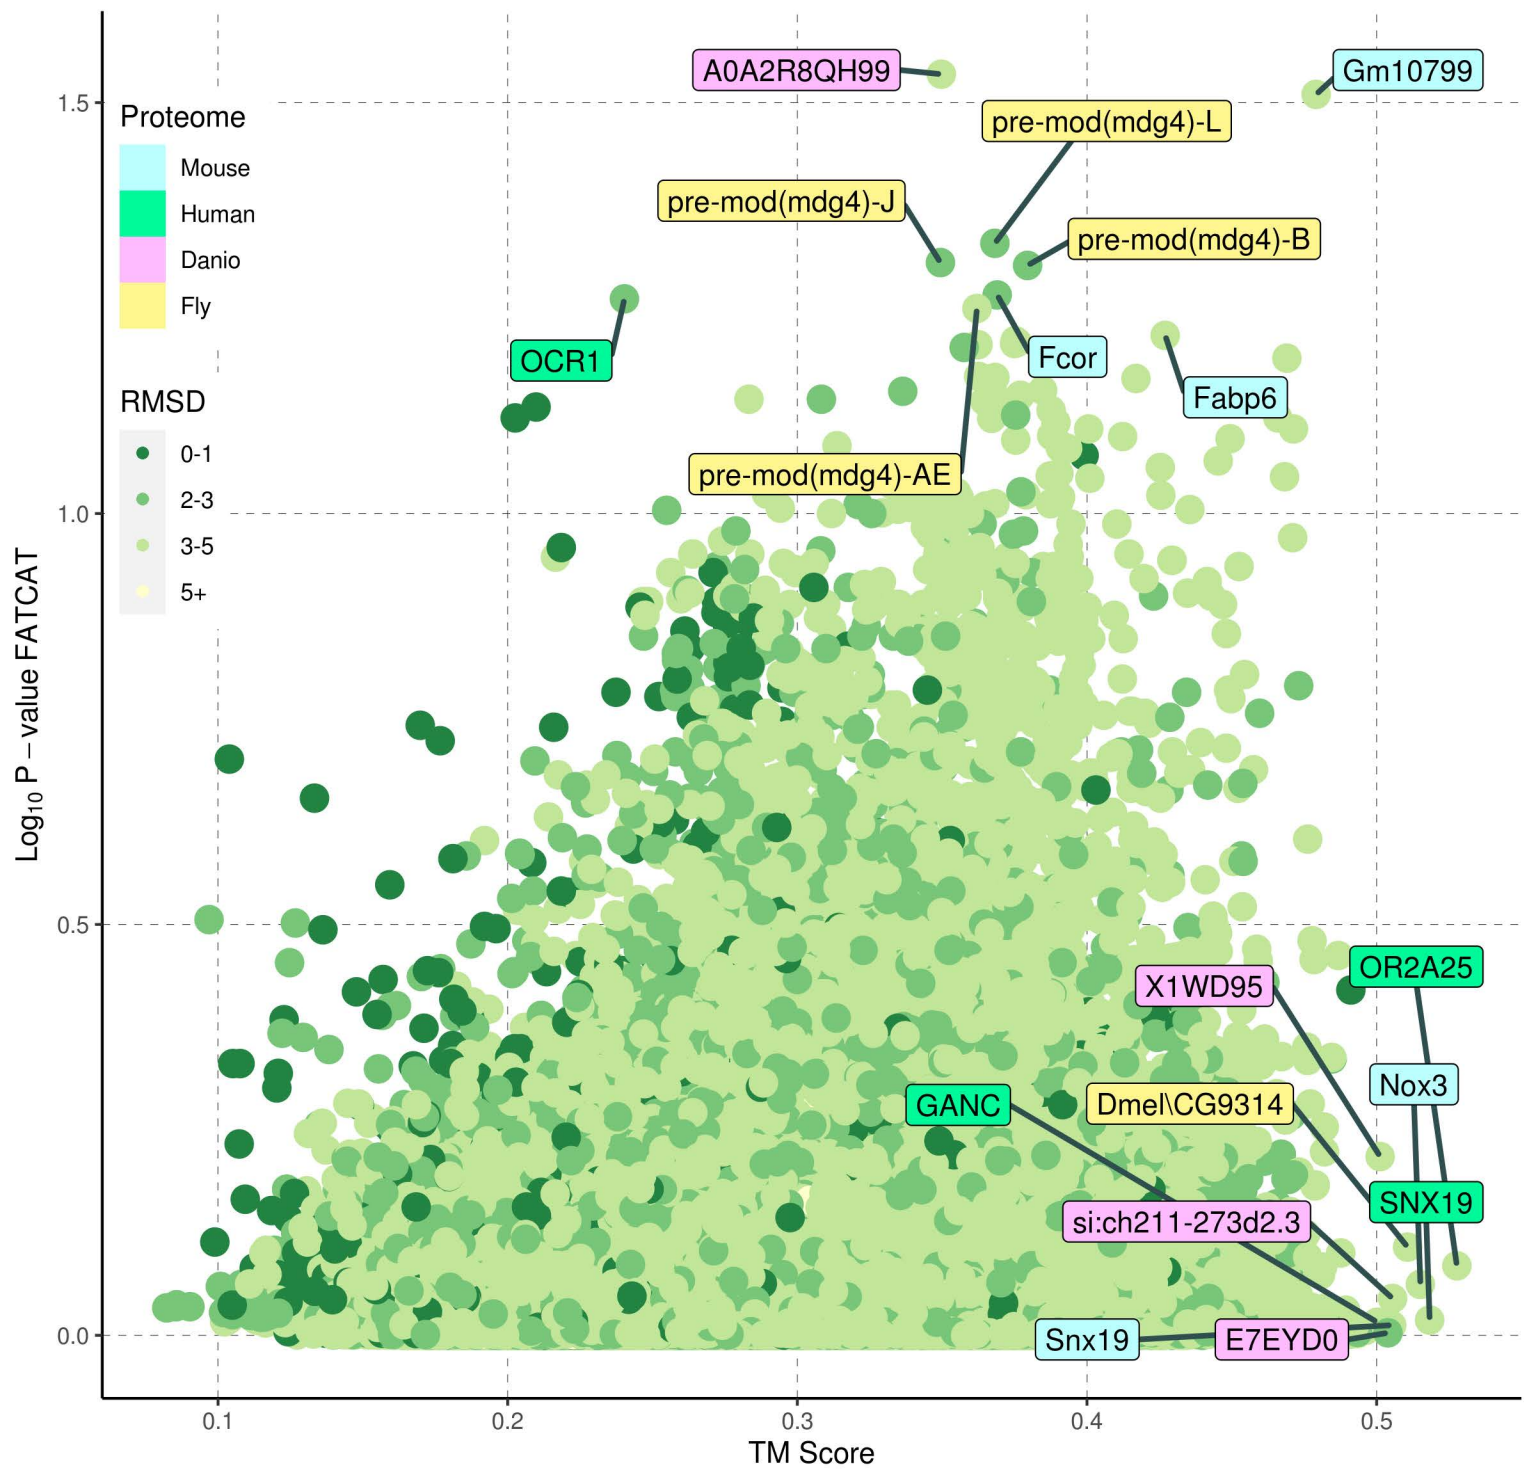



Borfl : No hits, top-scoring values are indicated

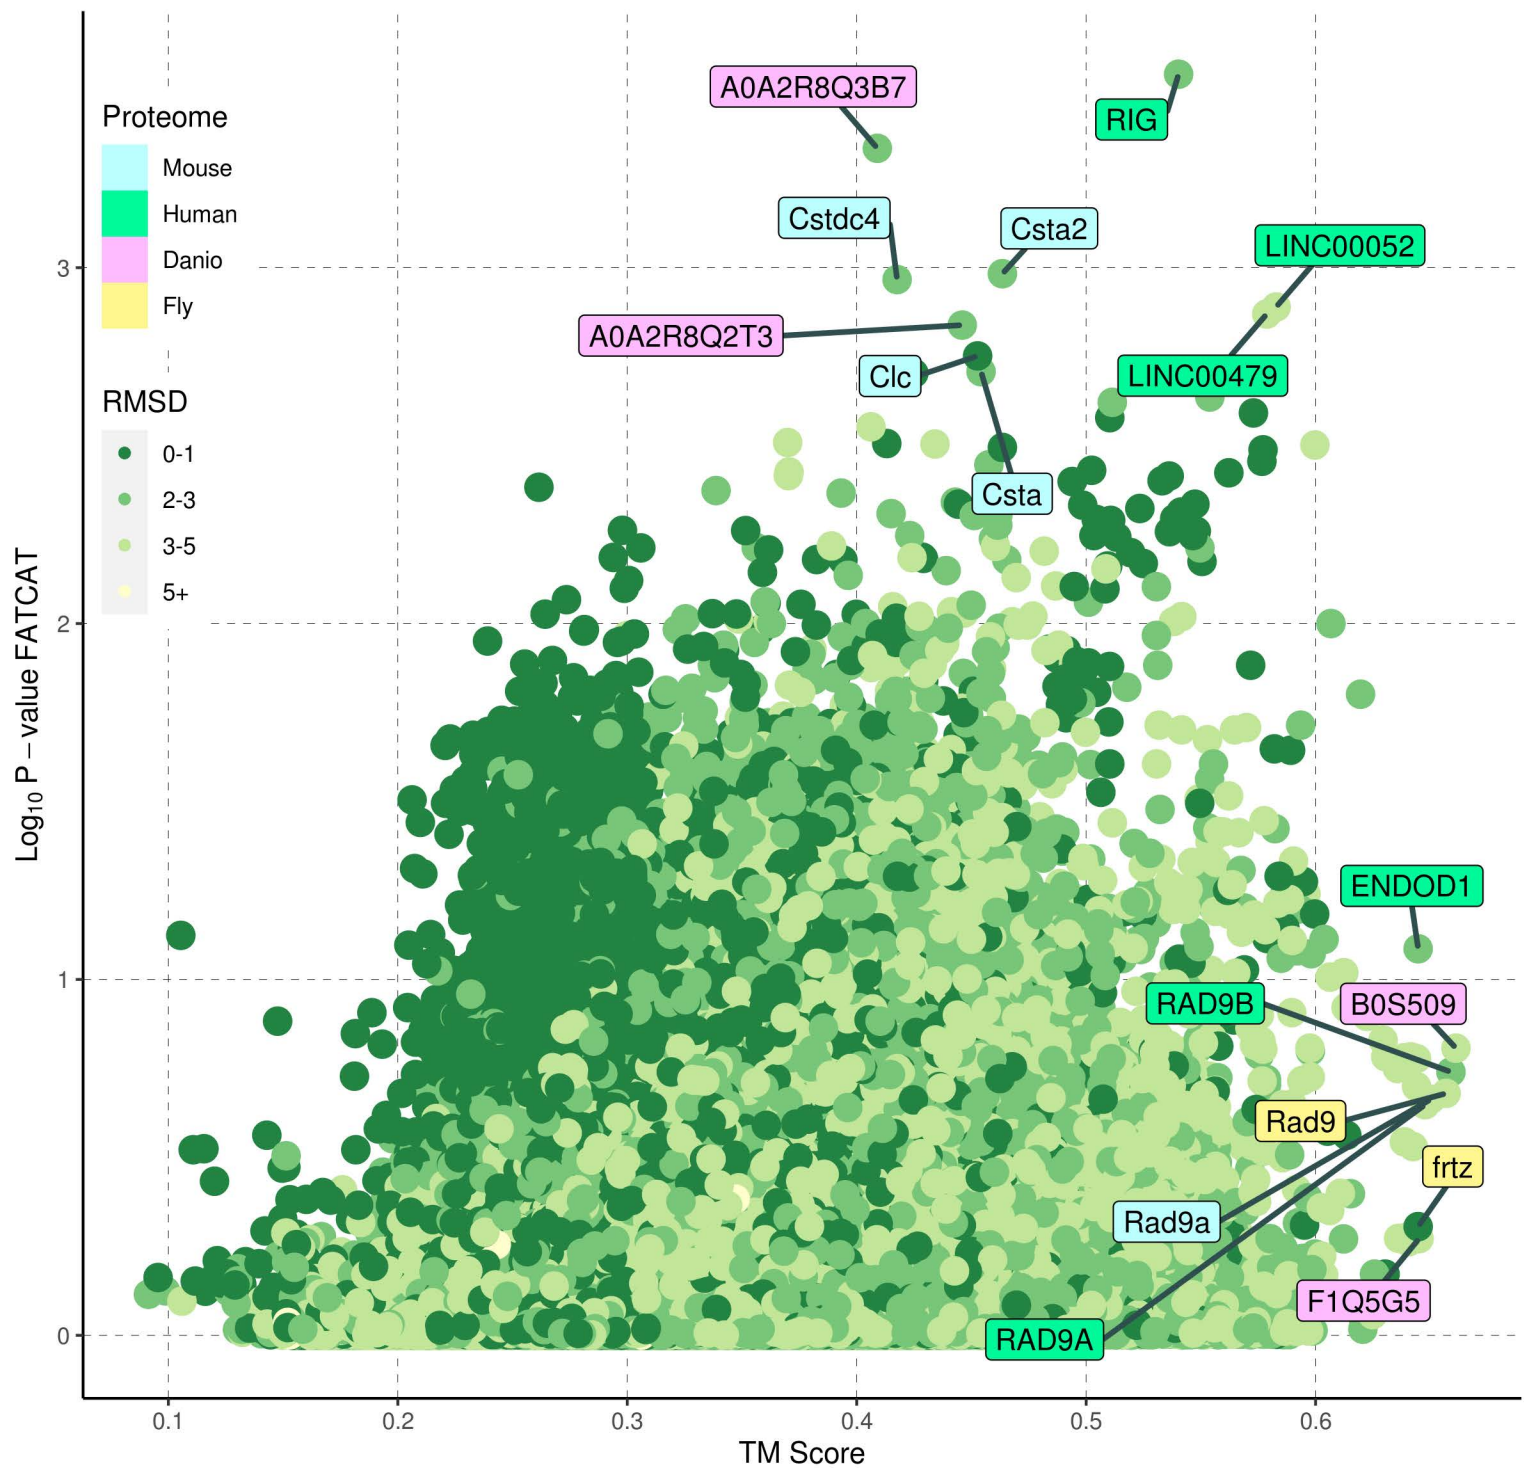

C1 : No hits, top-scoring values are indicated

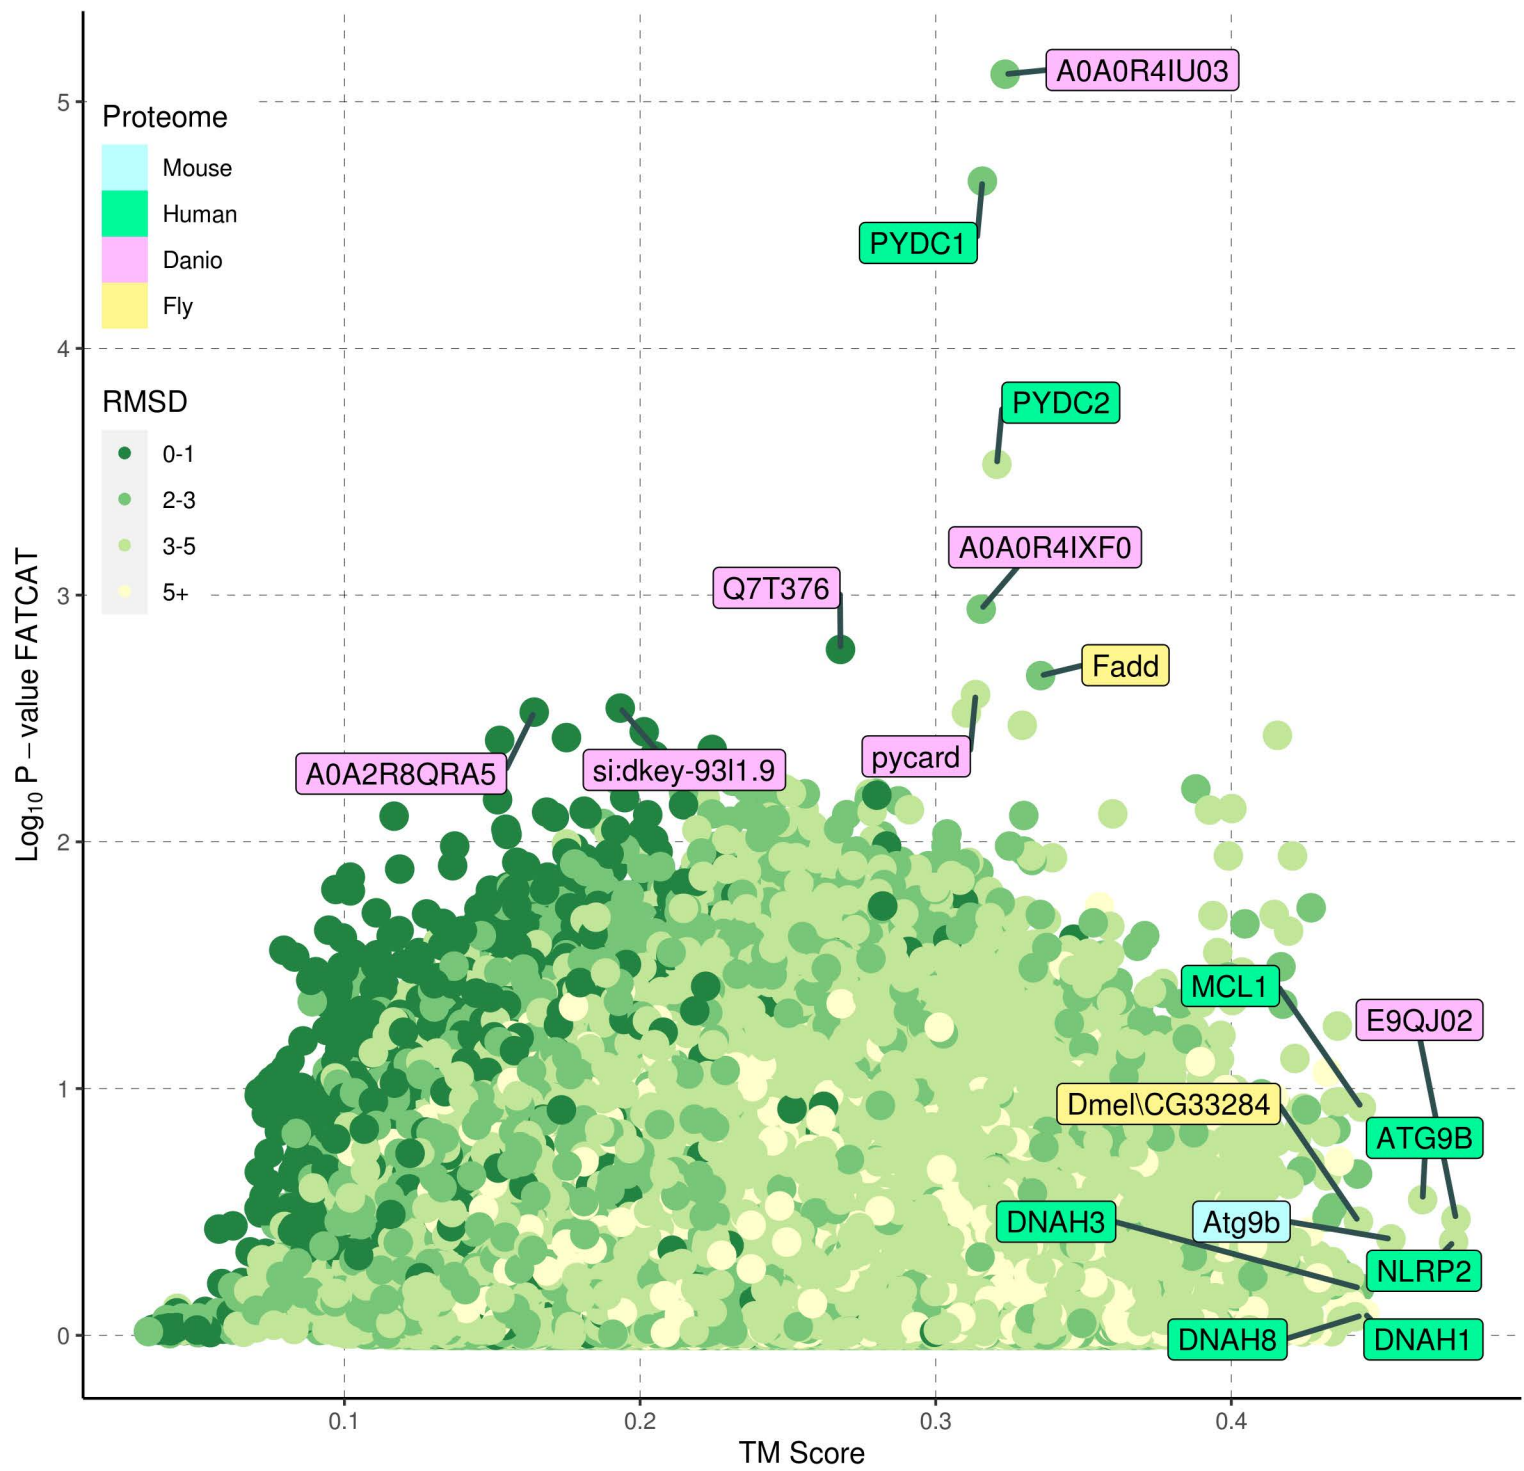

## C2

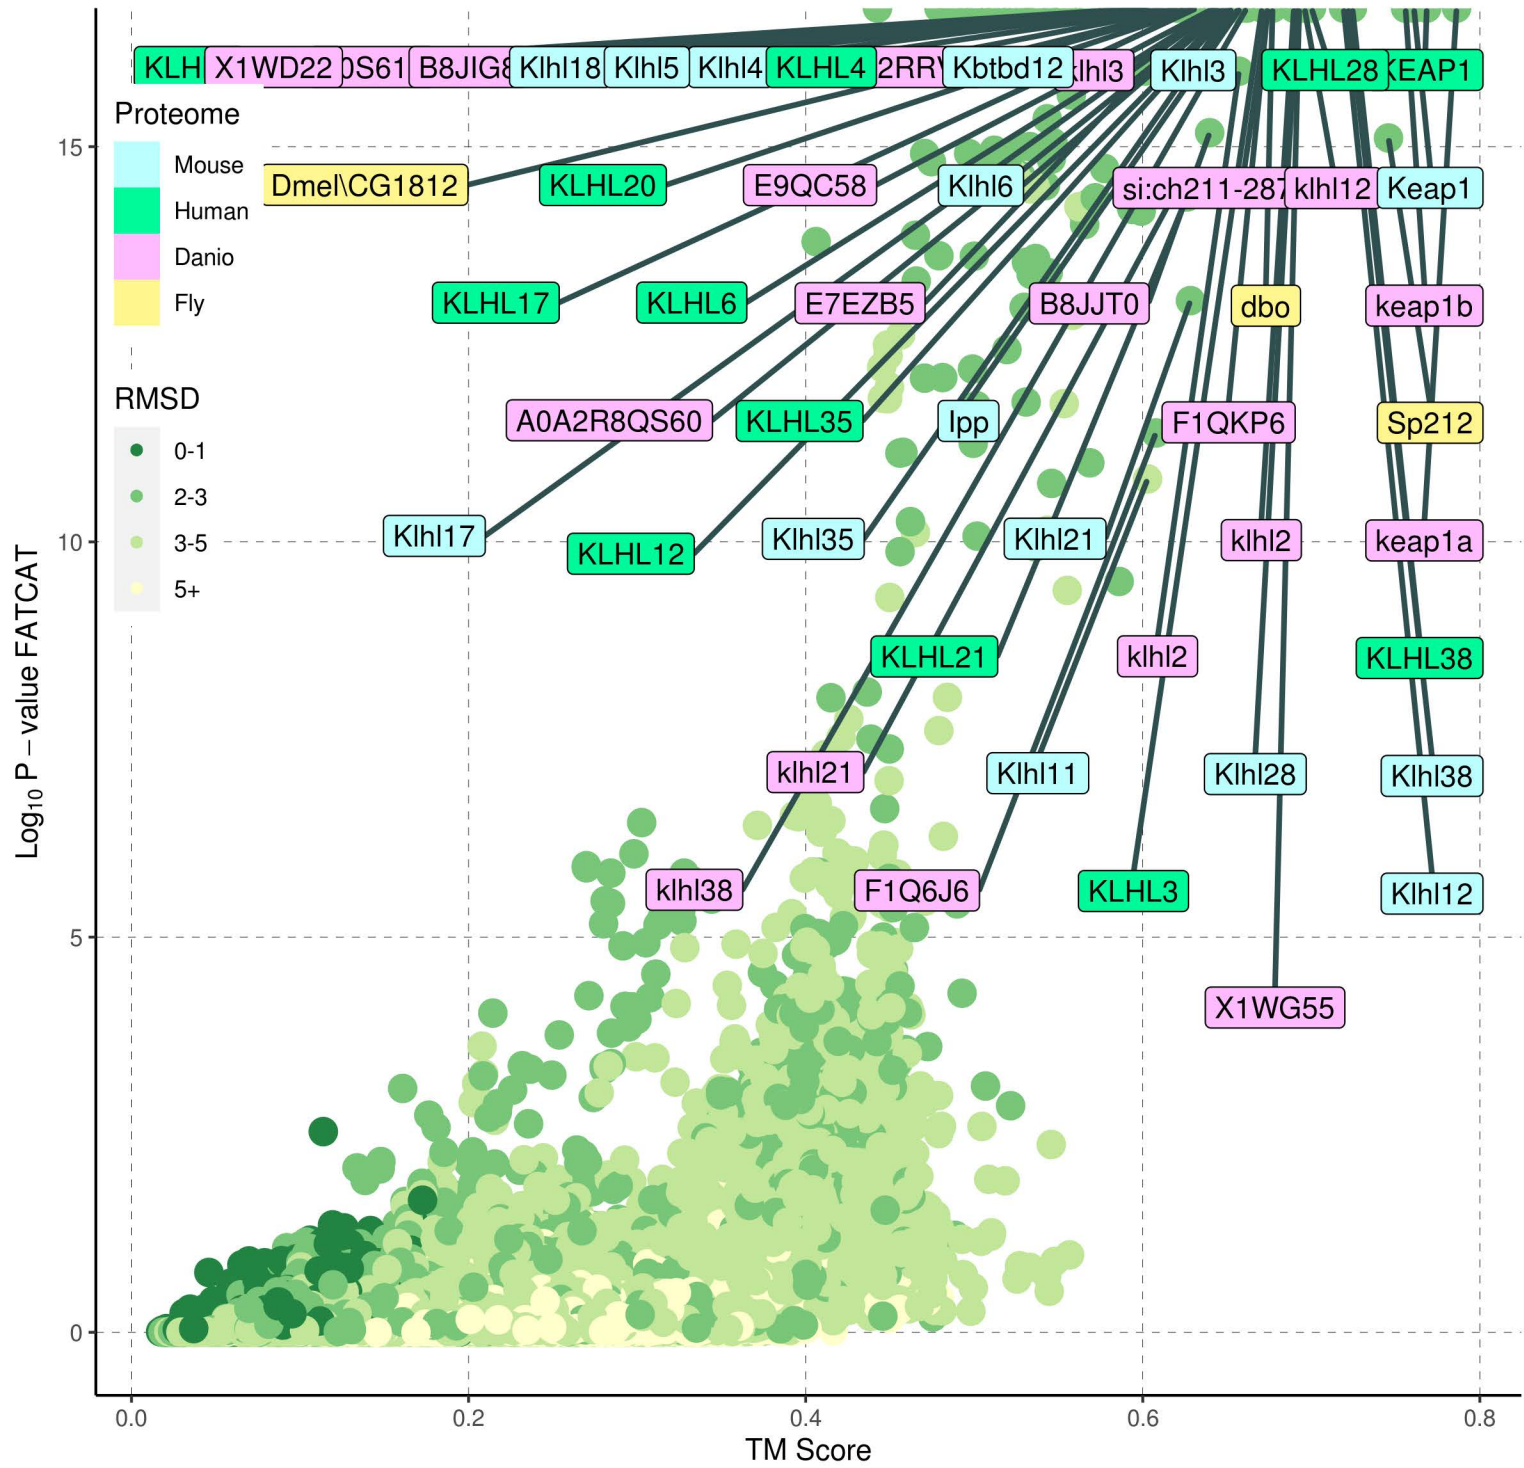

## C3

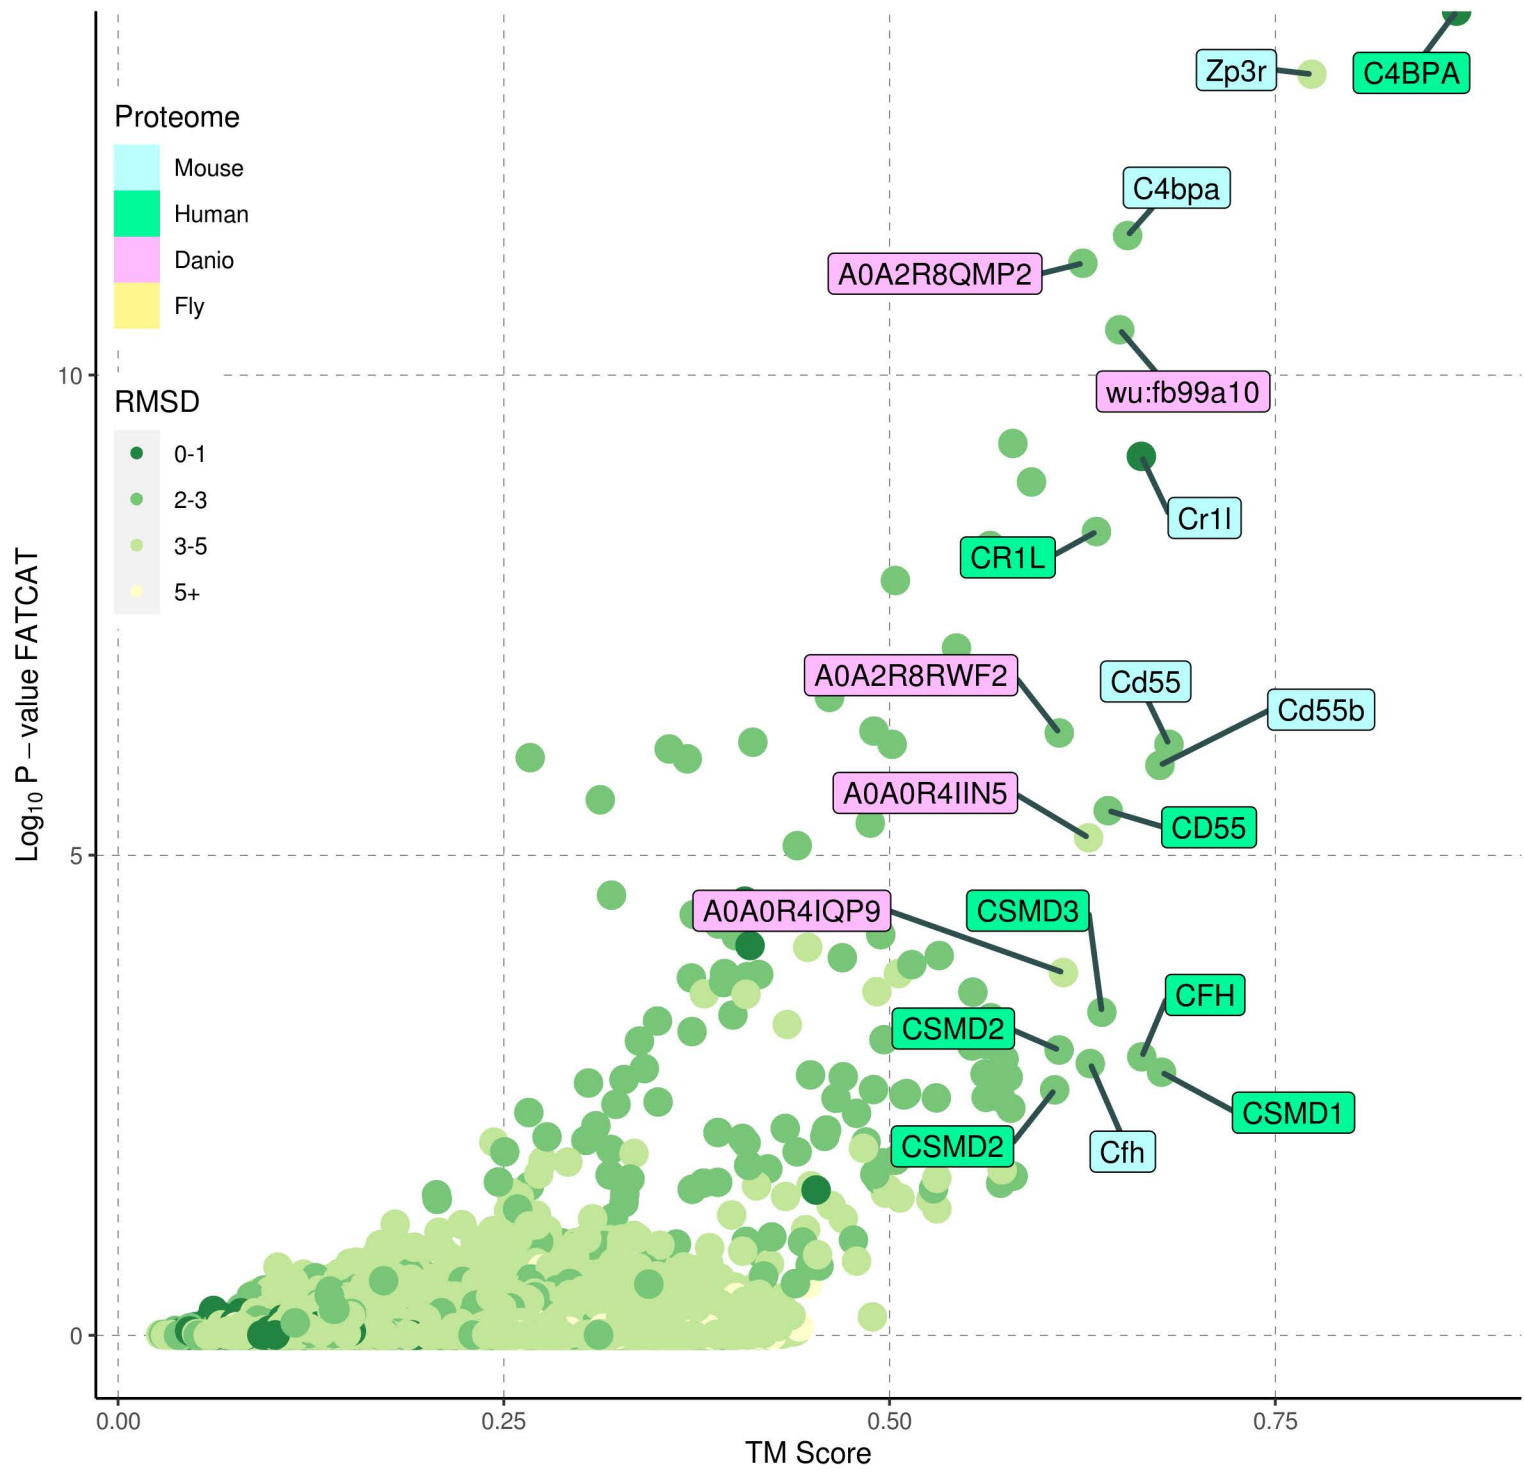

C4 : No hits, top-scoring values are indicated

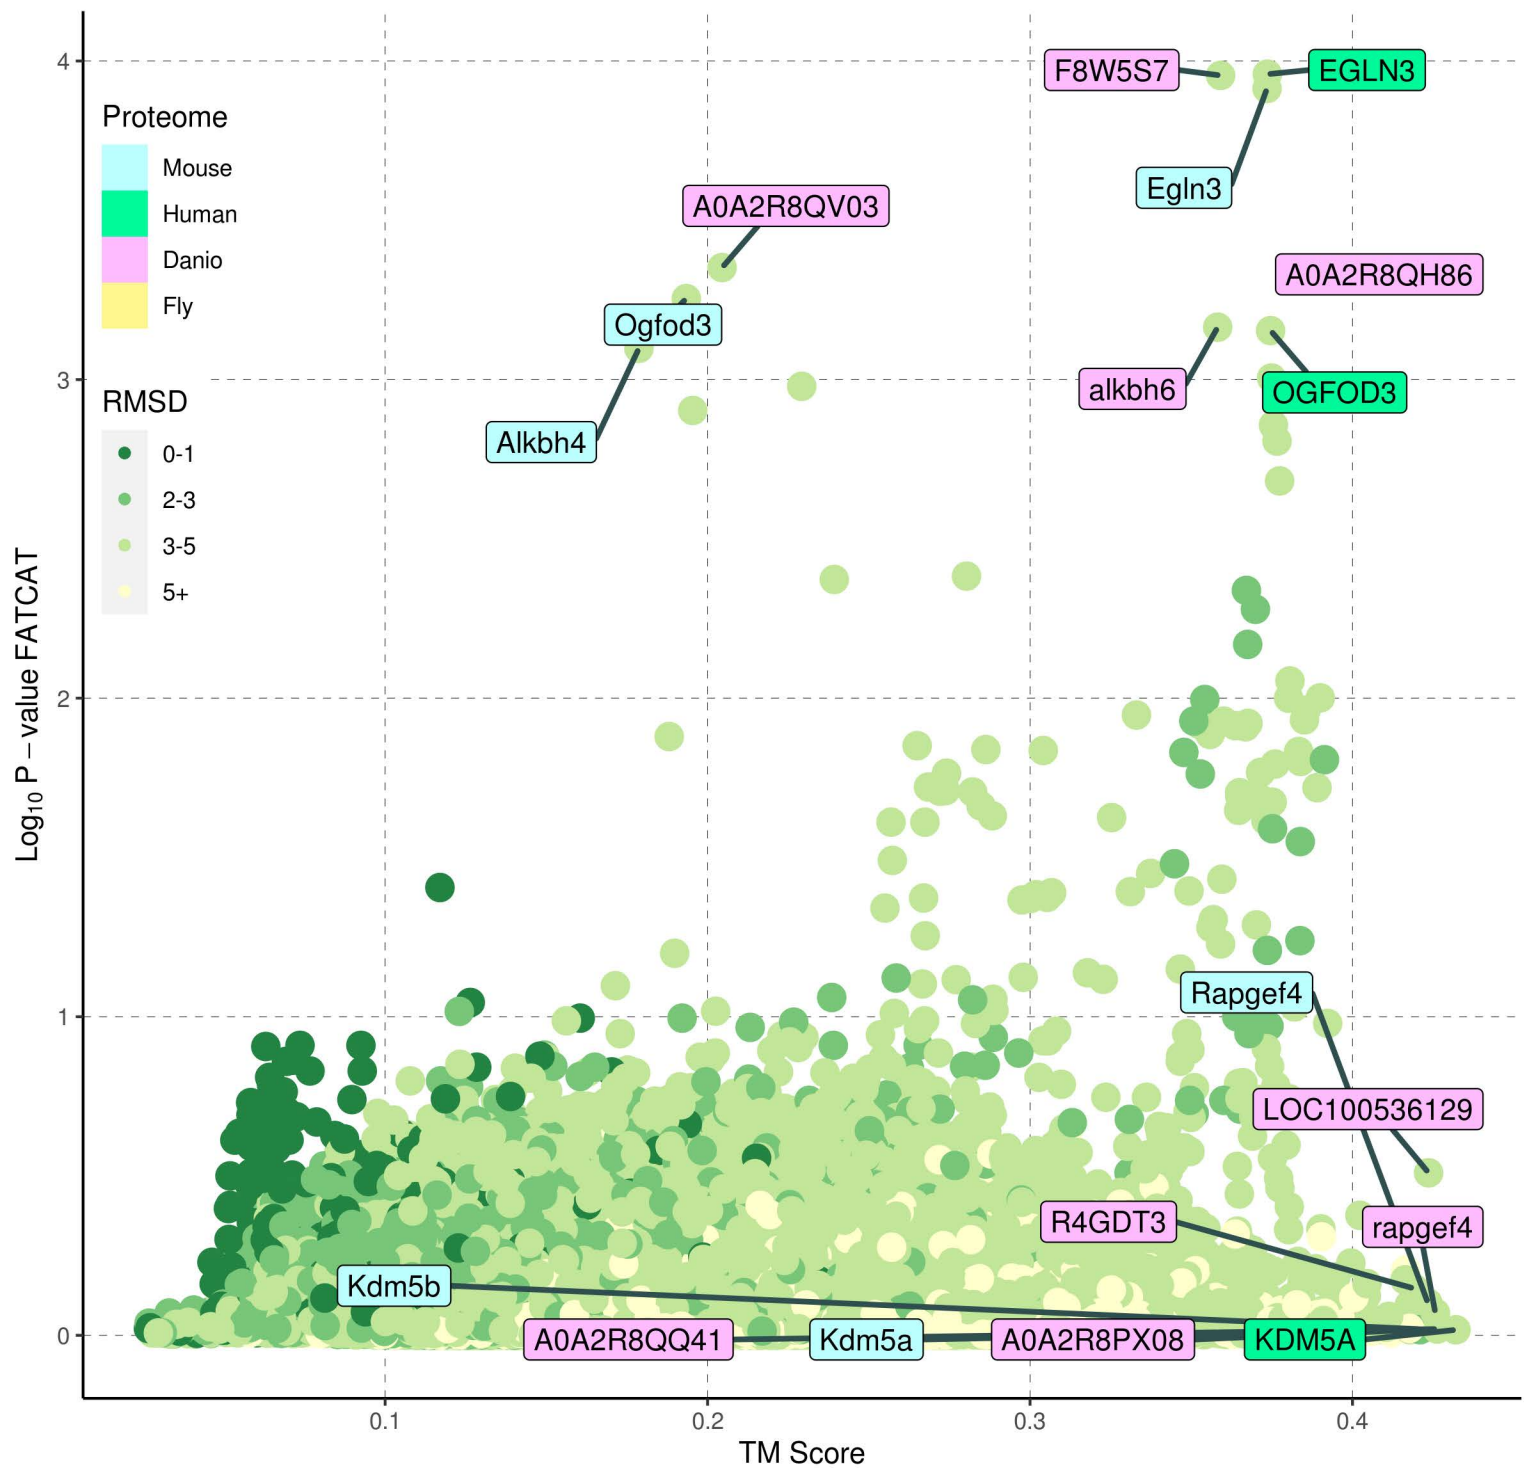

## C5

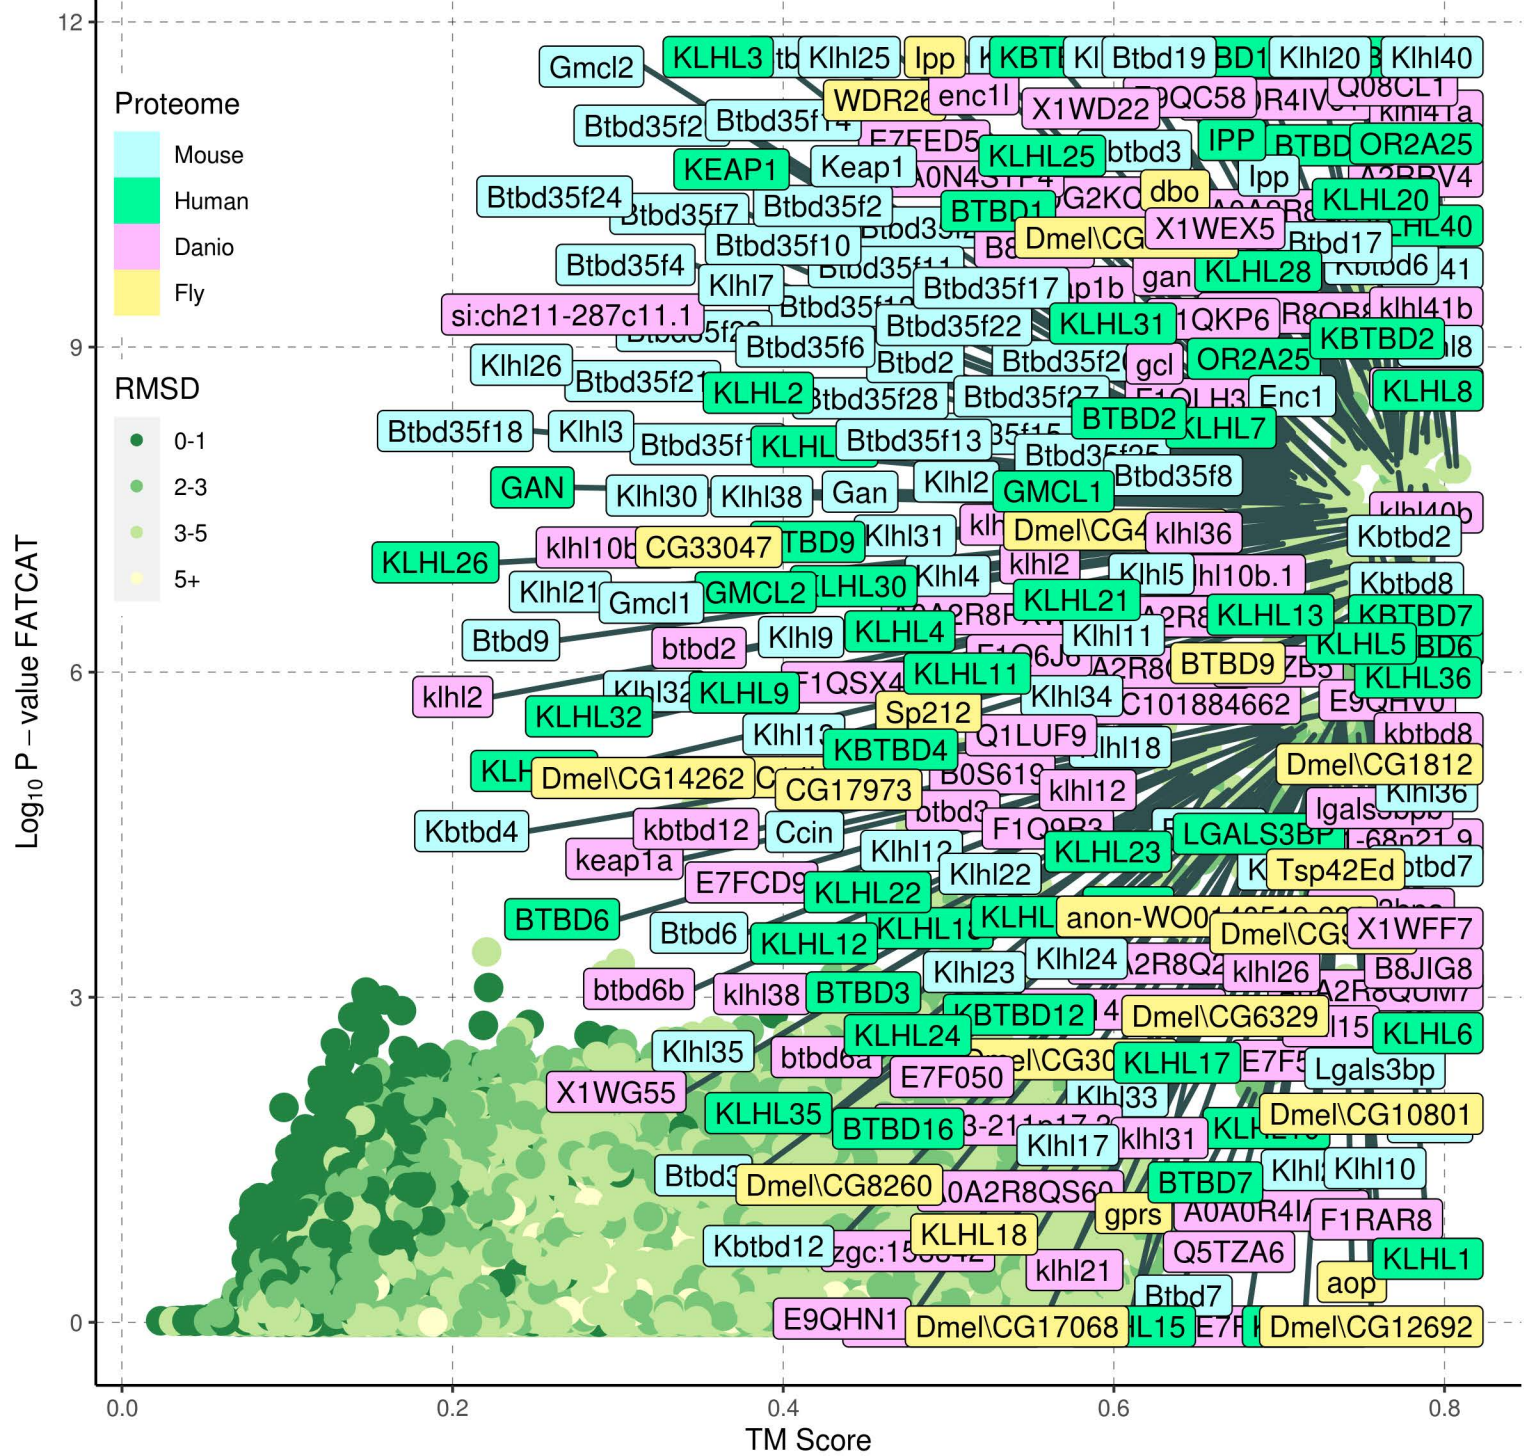

C6 : No hits, top-scoring values are indicated

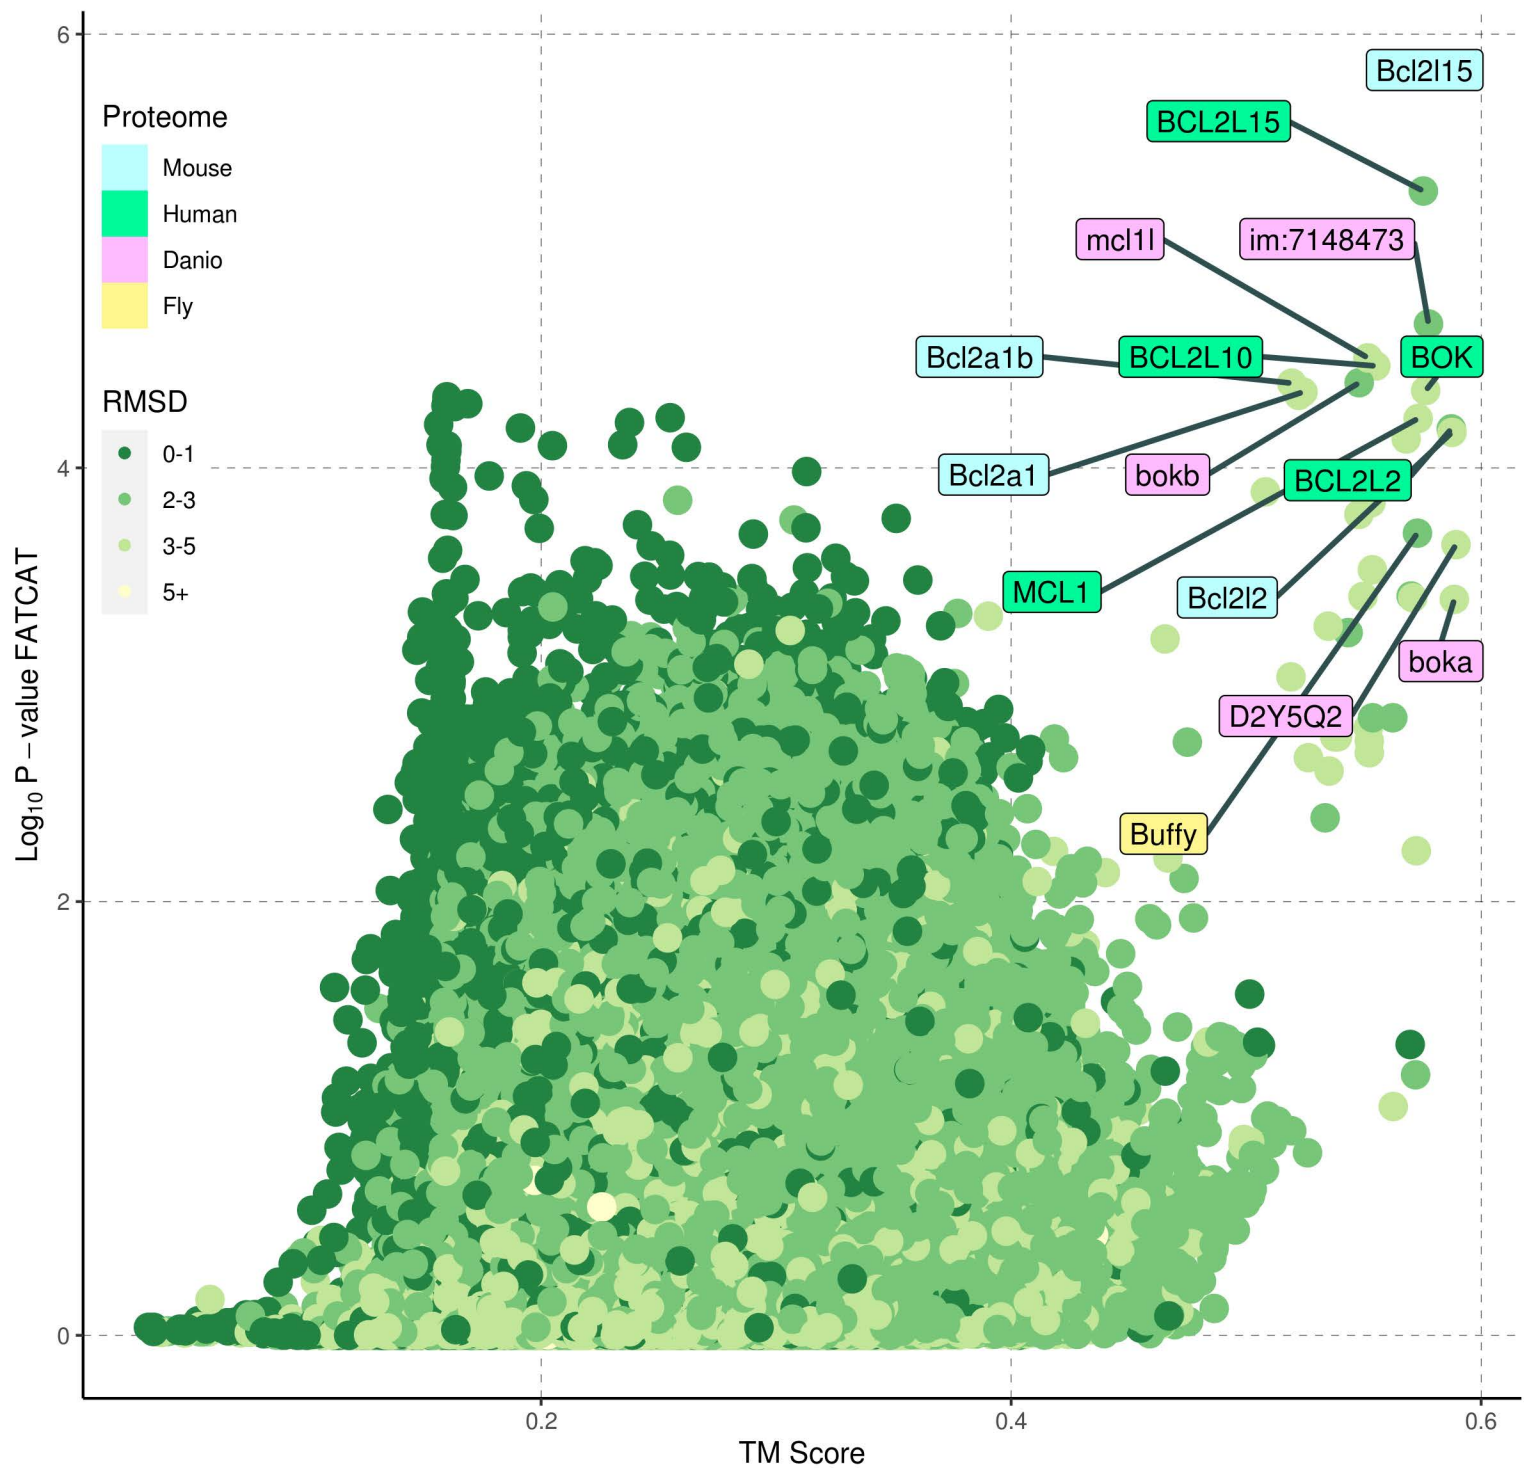

C7 : No hits, top-scoring values are indicated

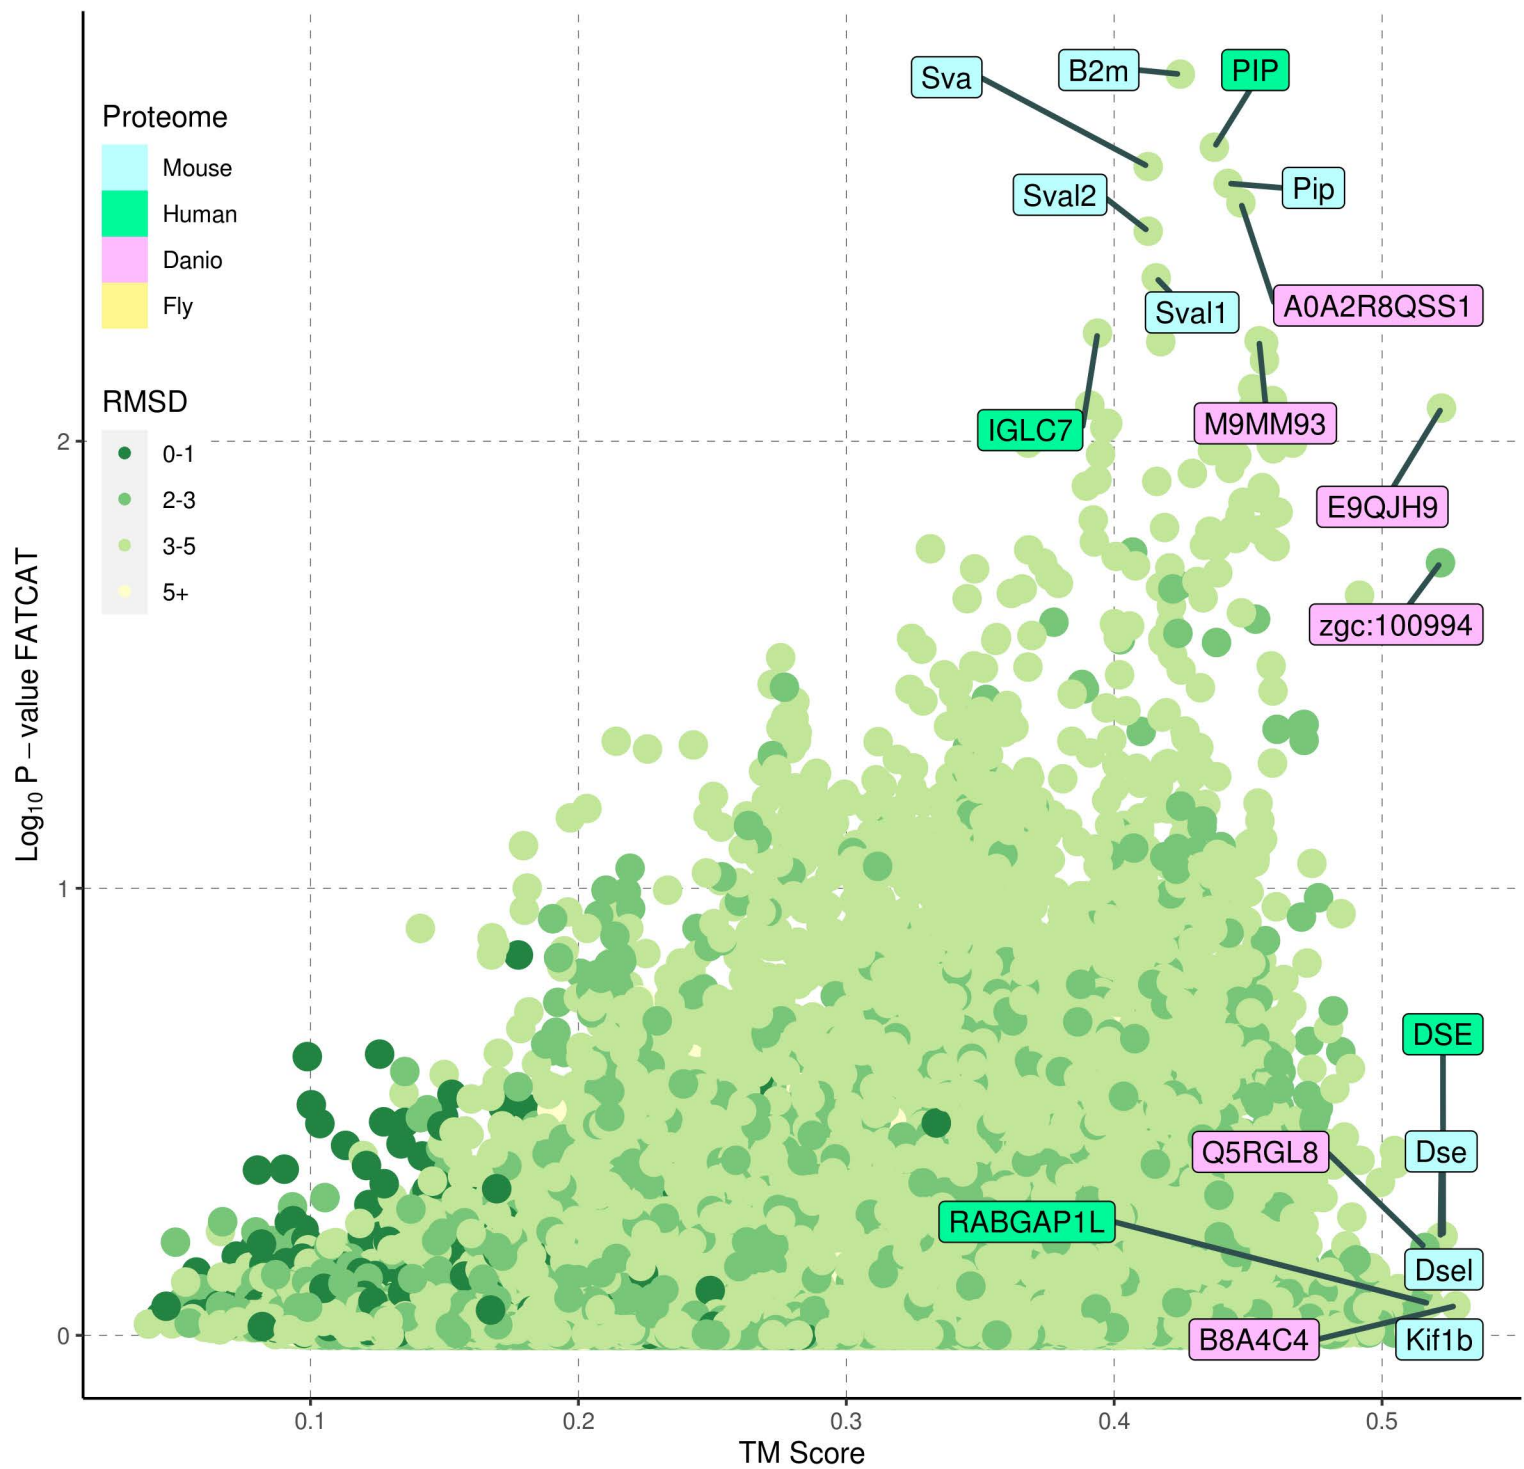



C8 : No hits, top-scoring values are indicated

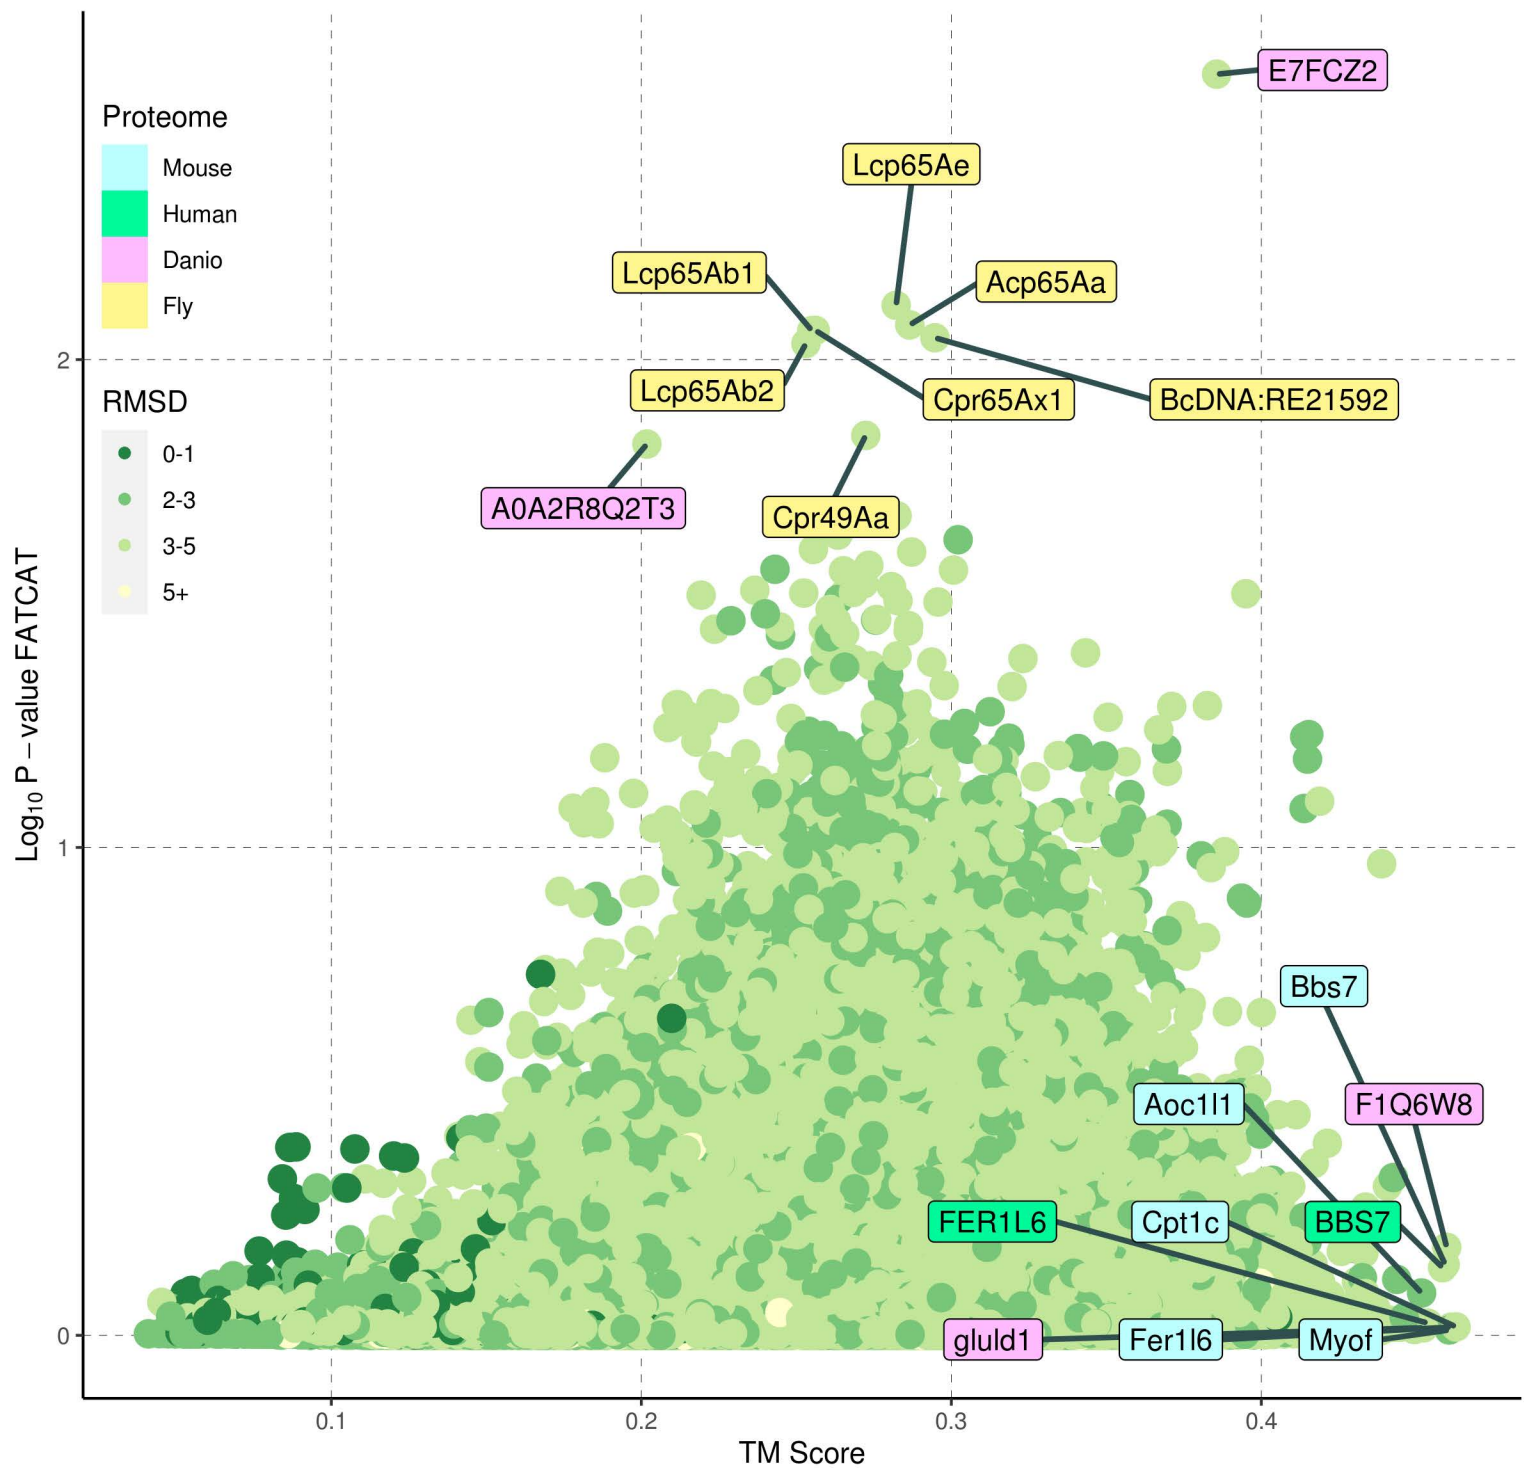

C9 : No hits, top-scoring values are indicated

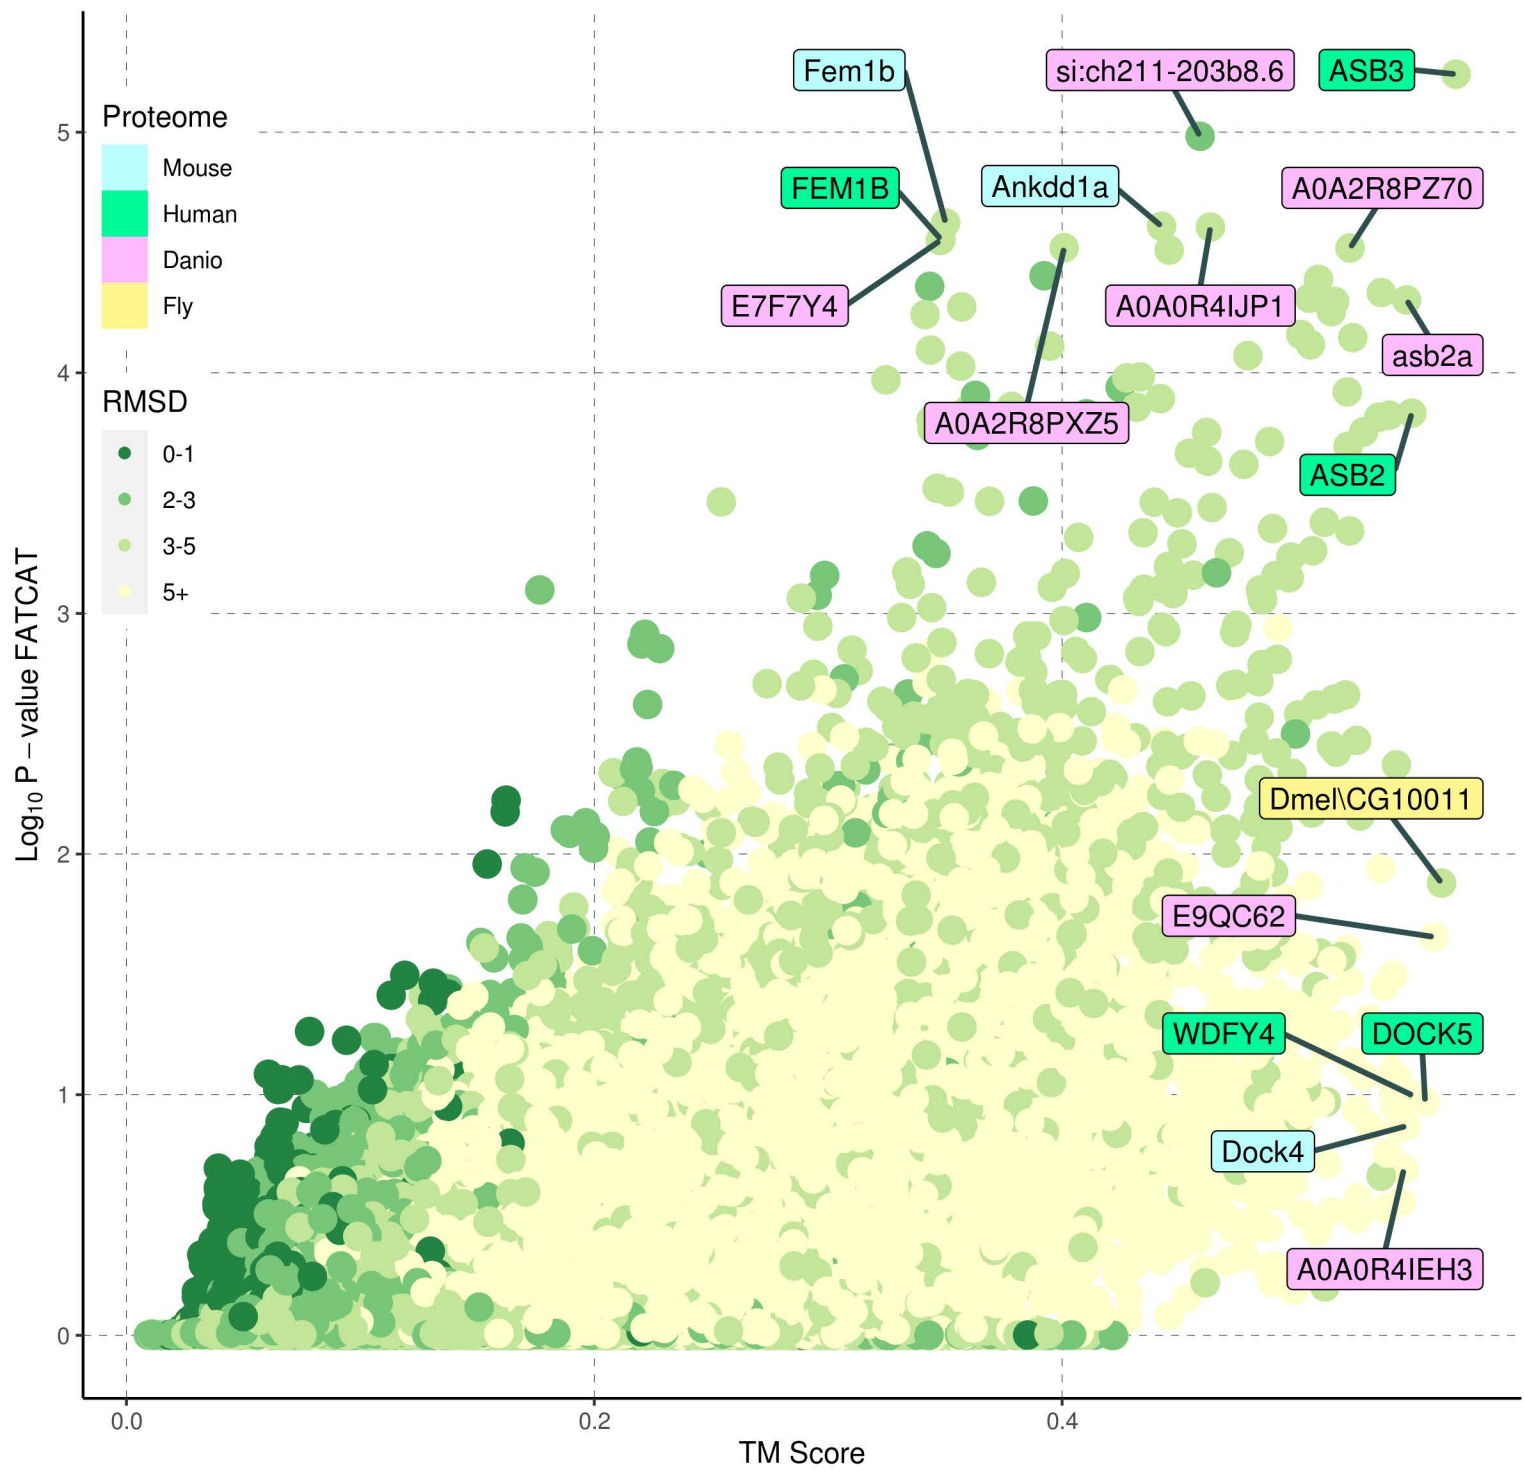

C10 : No hits, top-scoring values are indicated

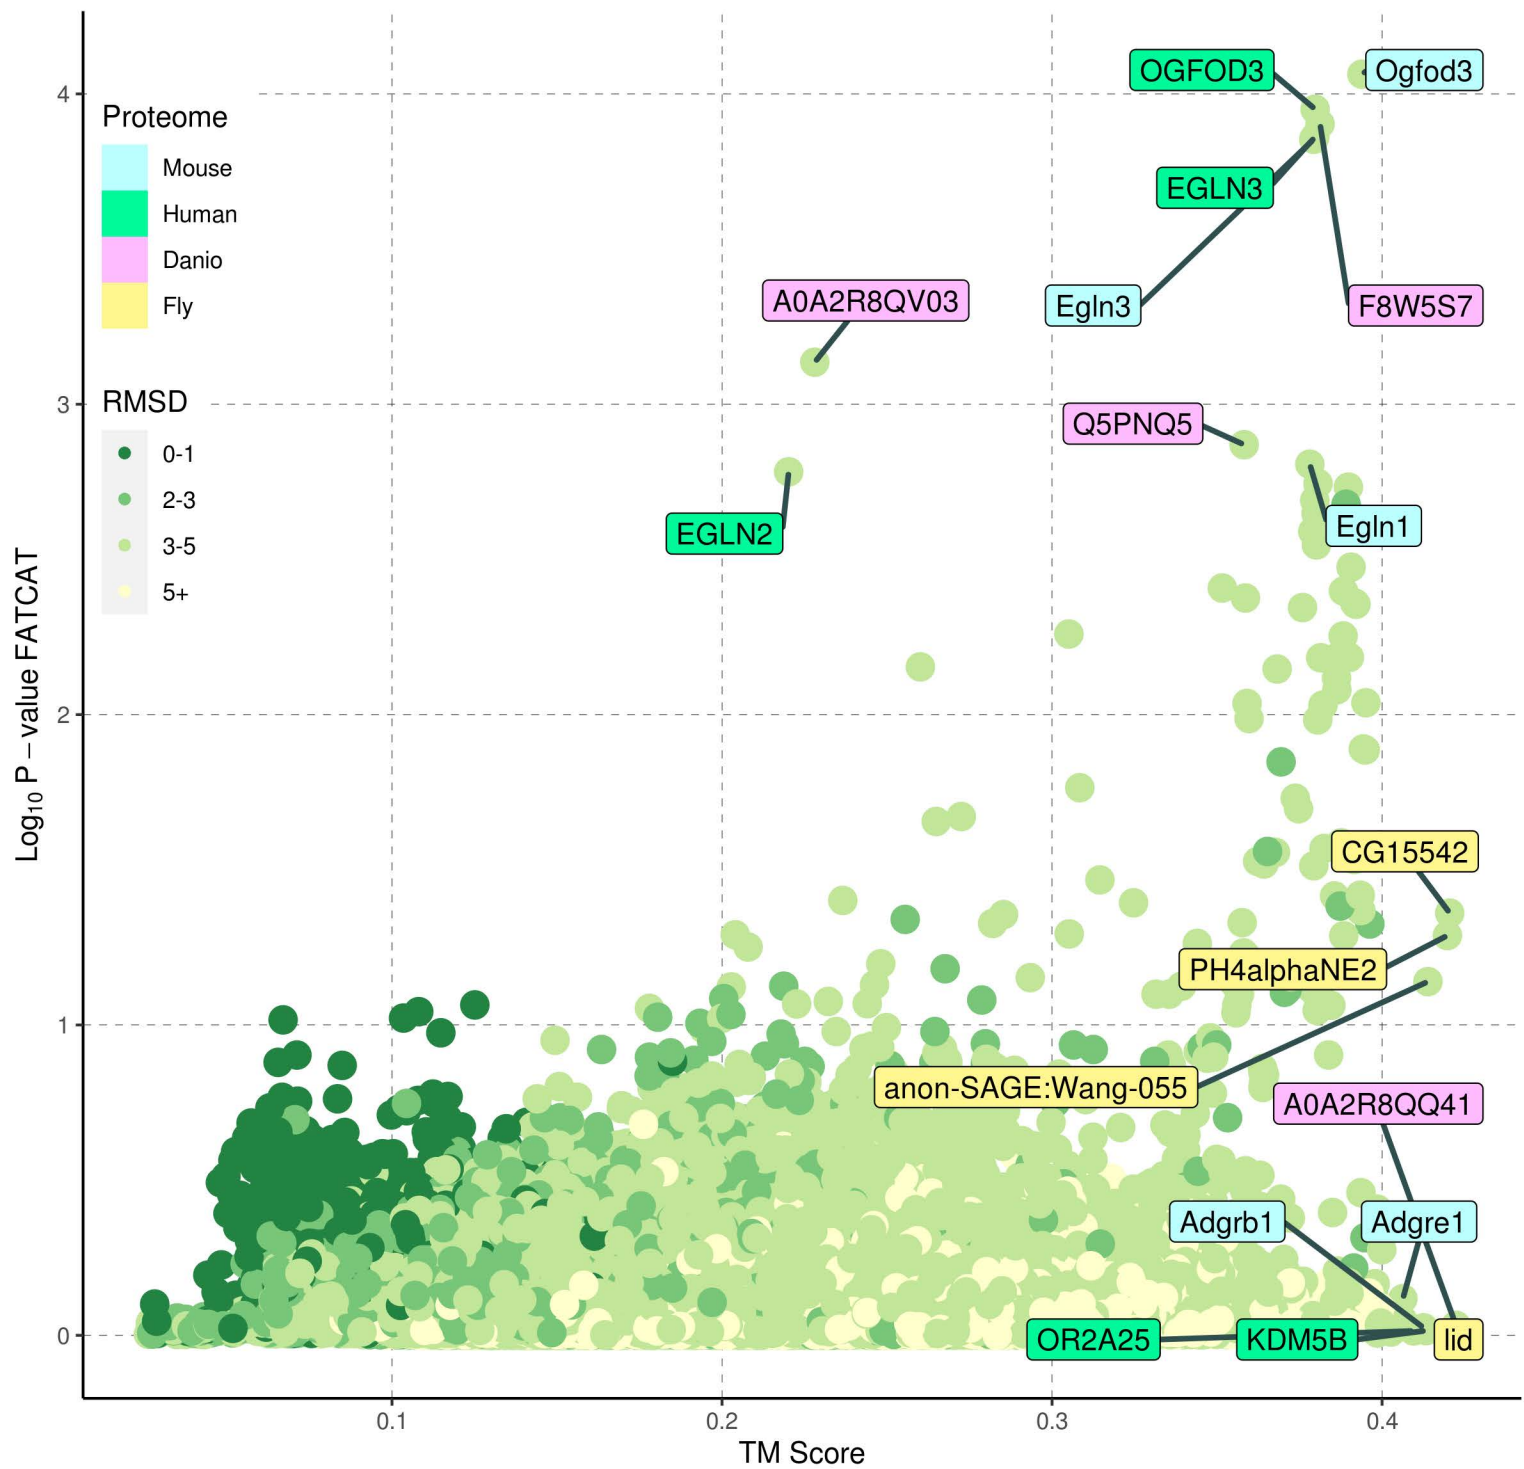

C11 : No hits, top-scoring values are indicated

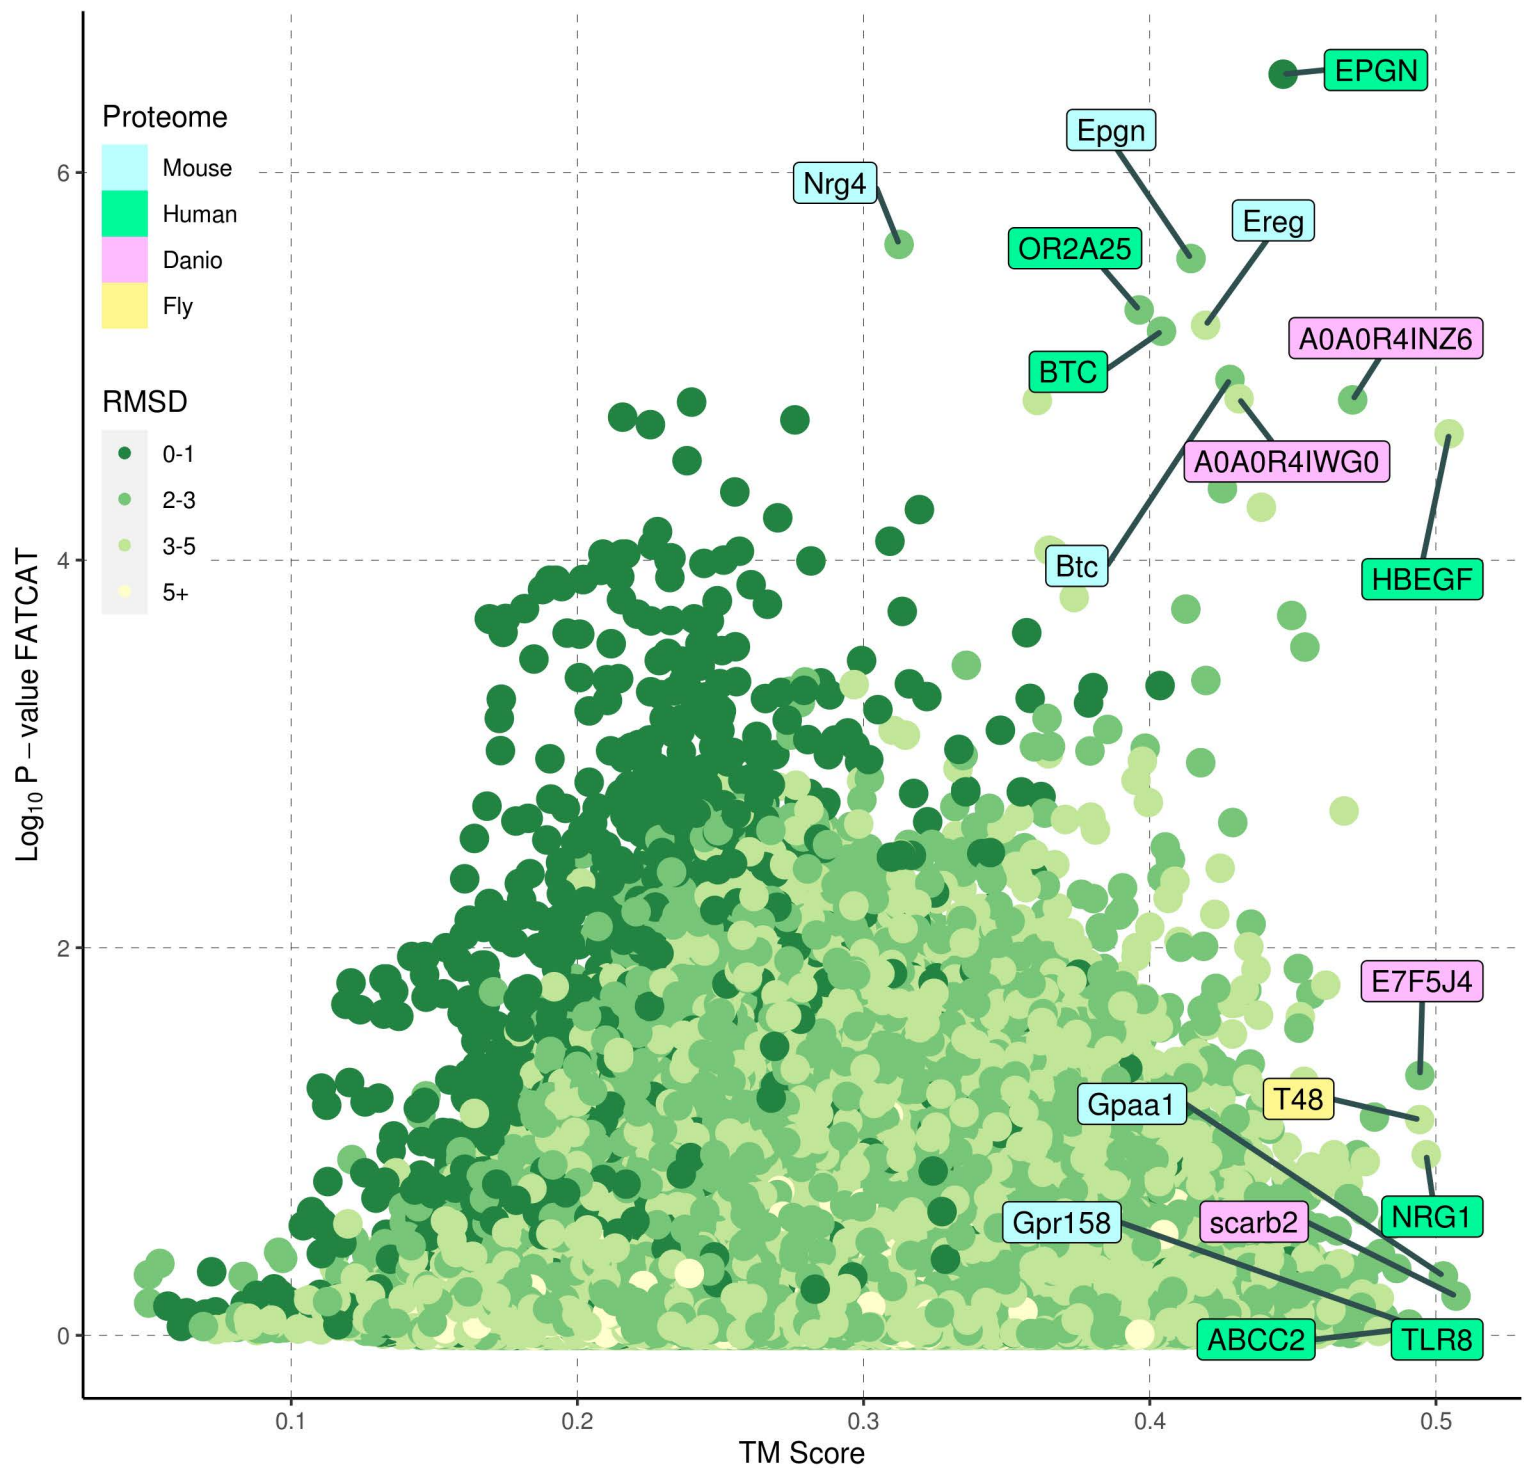

# C12

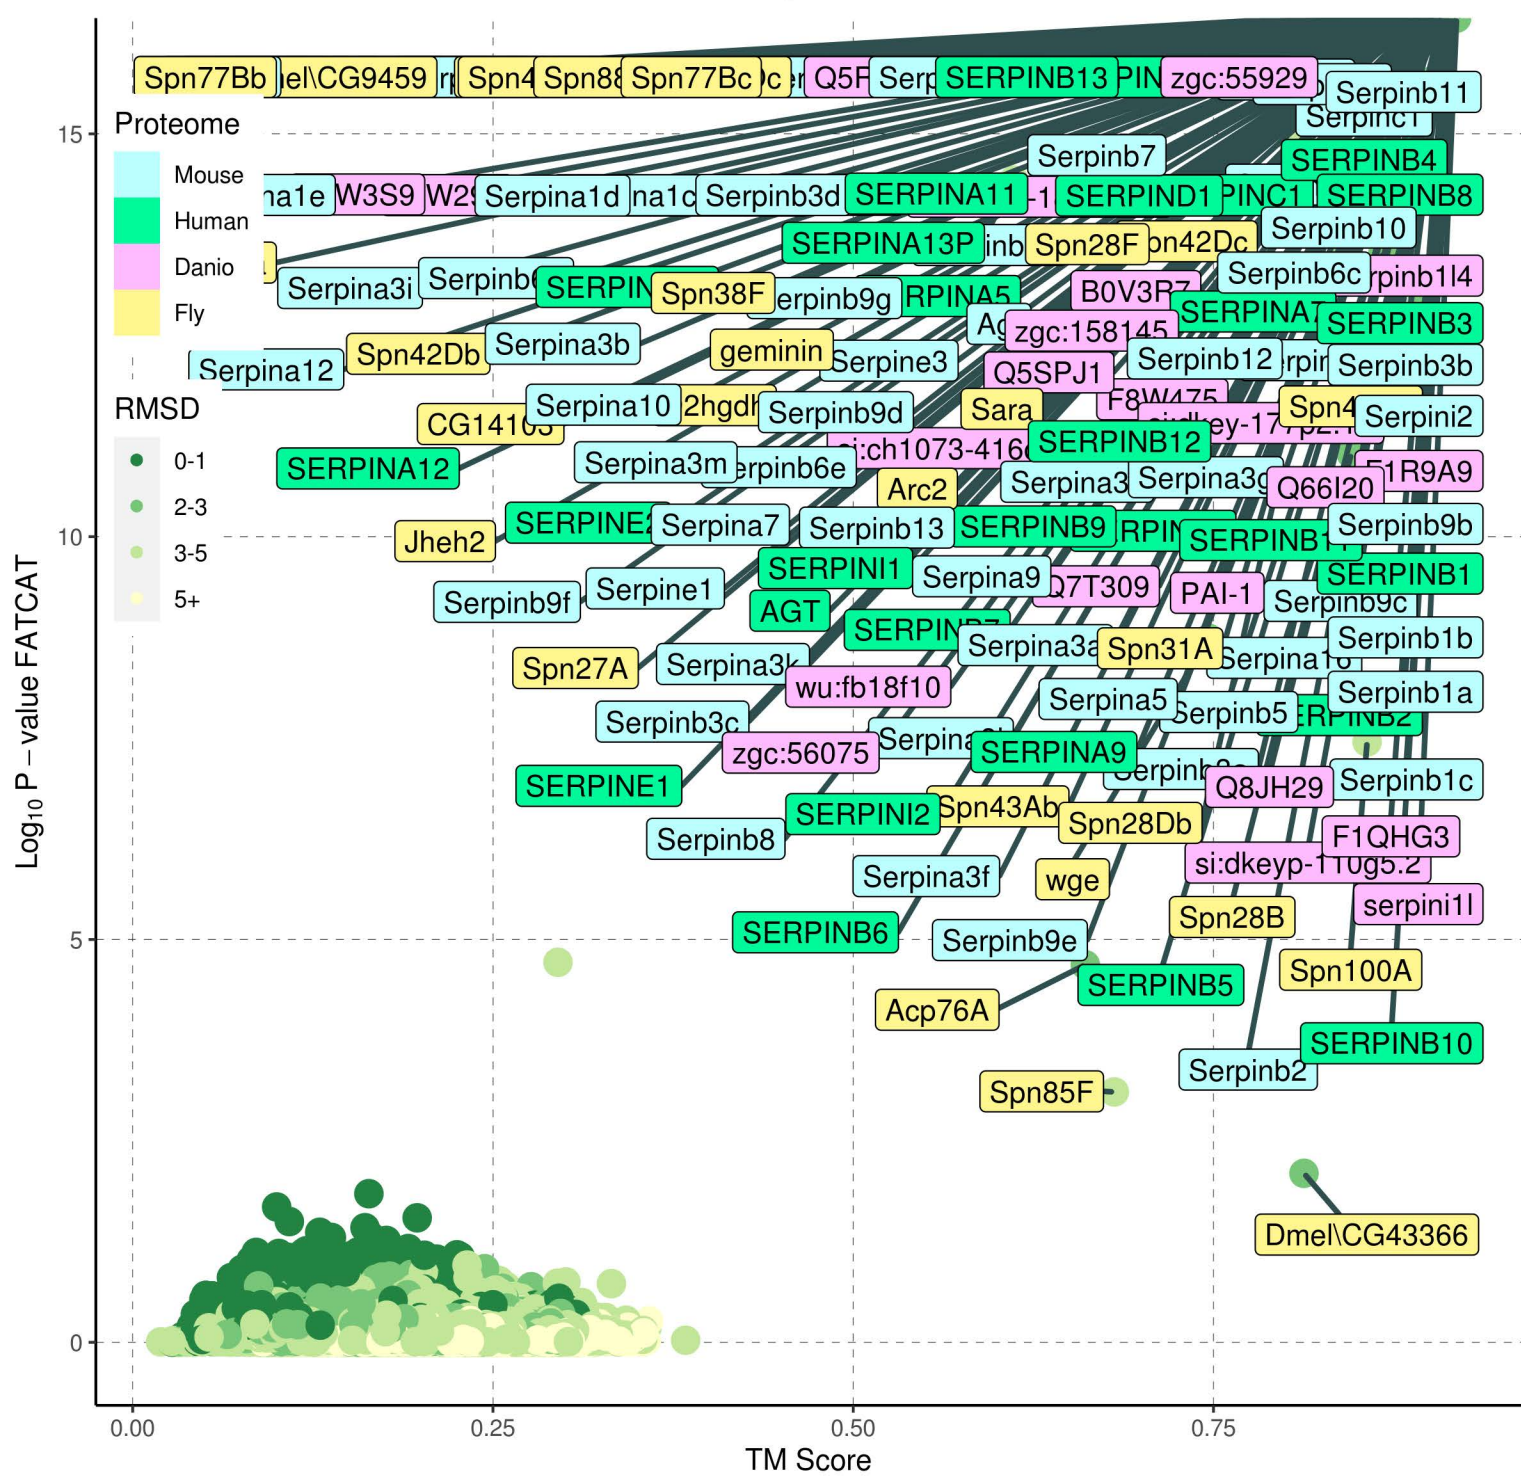

C13 : No hits, top-scoring values are indicated

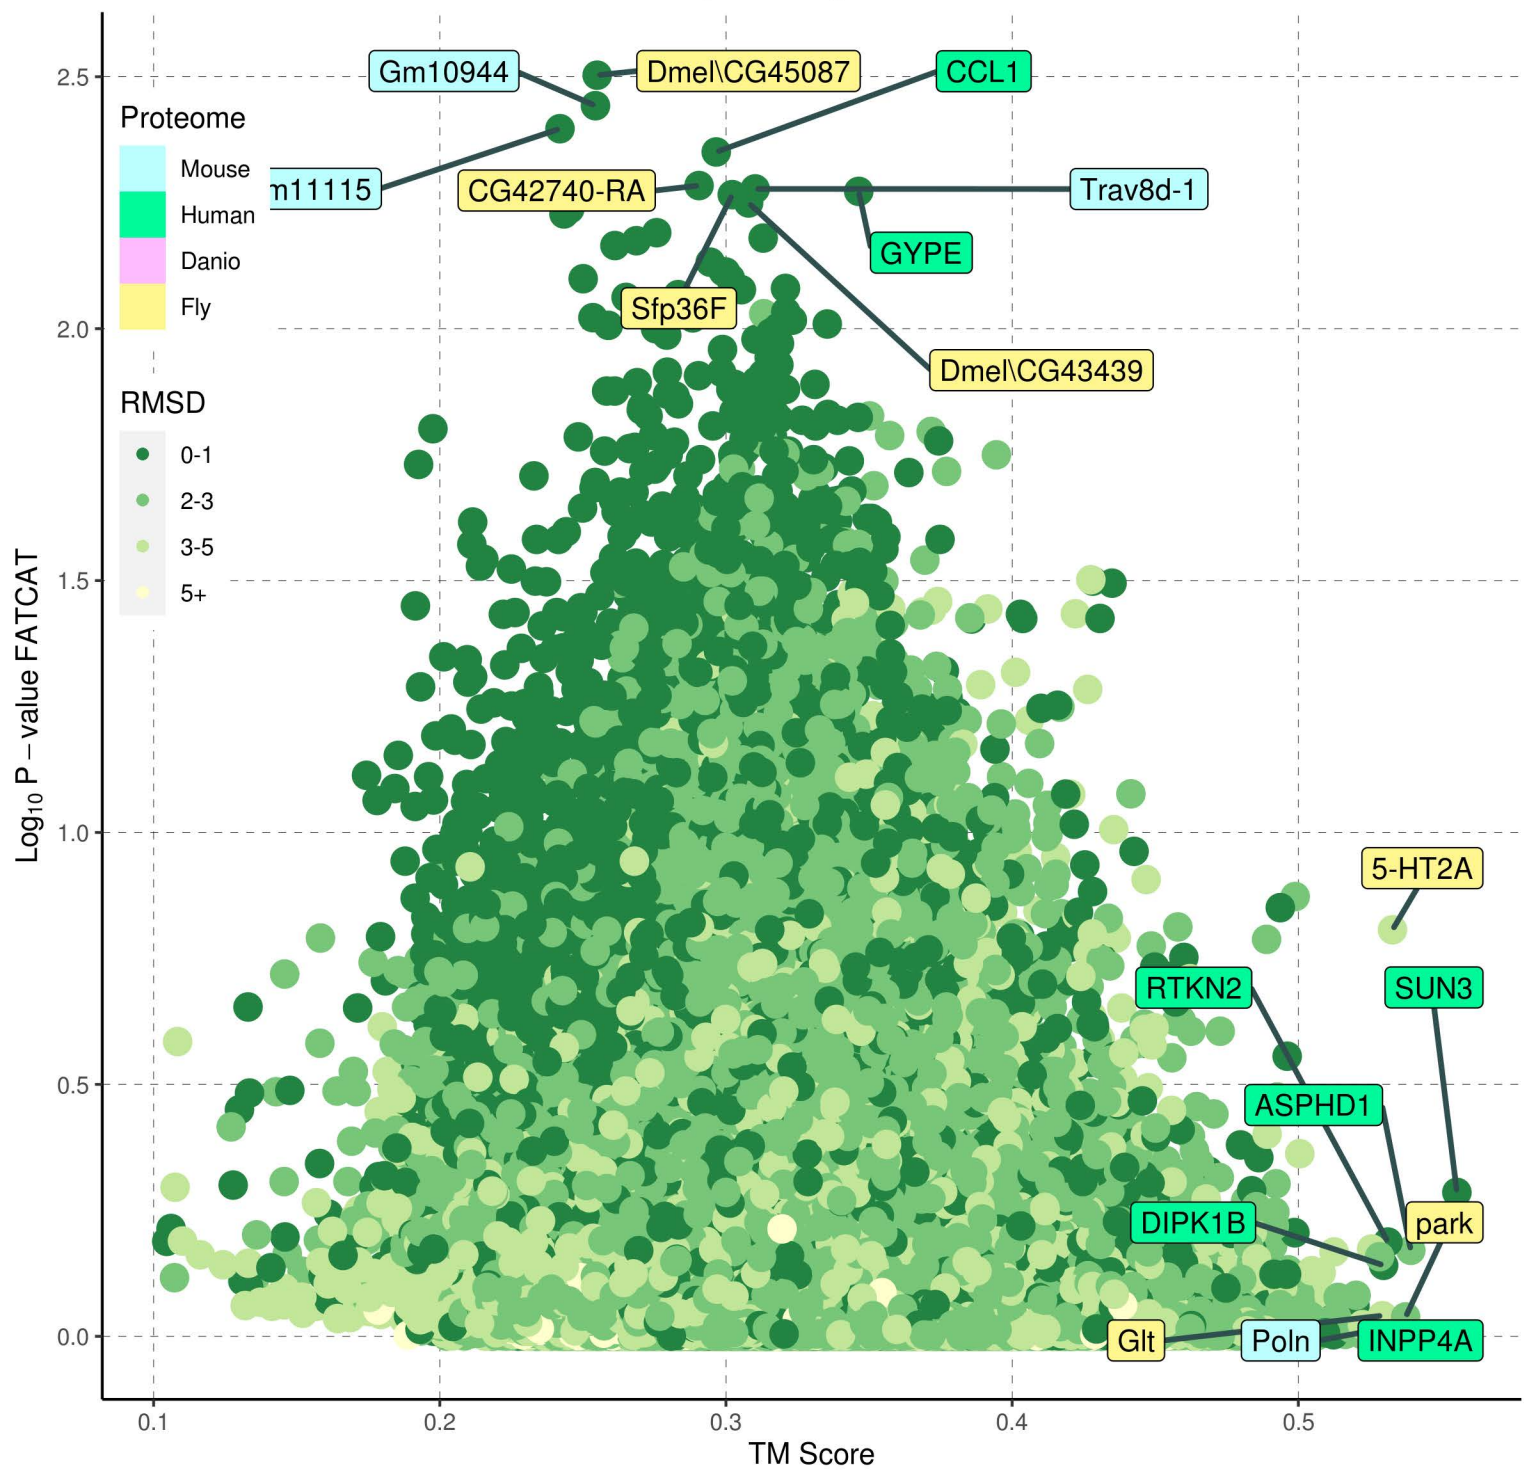

C14 : No hits, top-scoring values are indicated

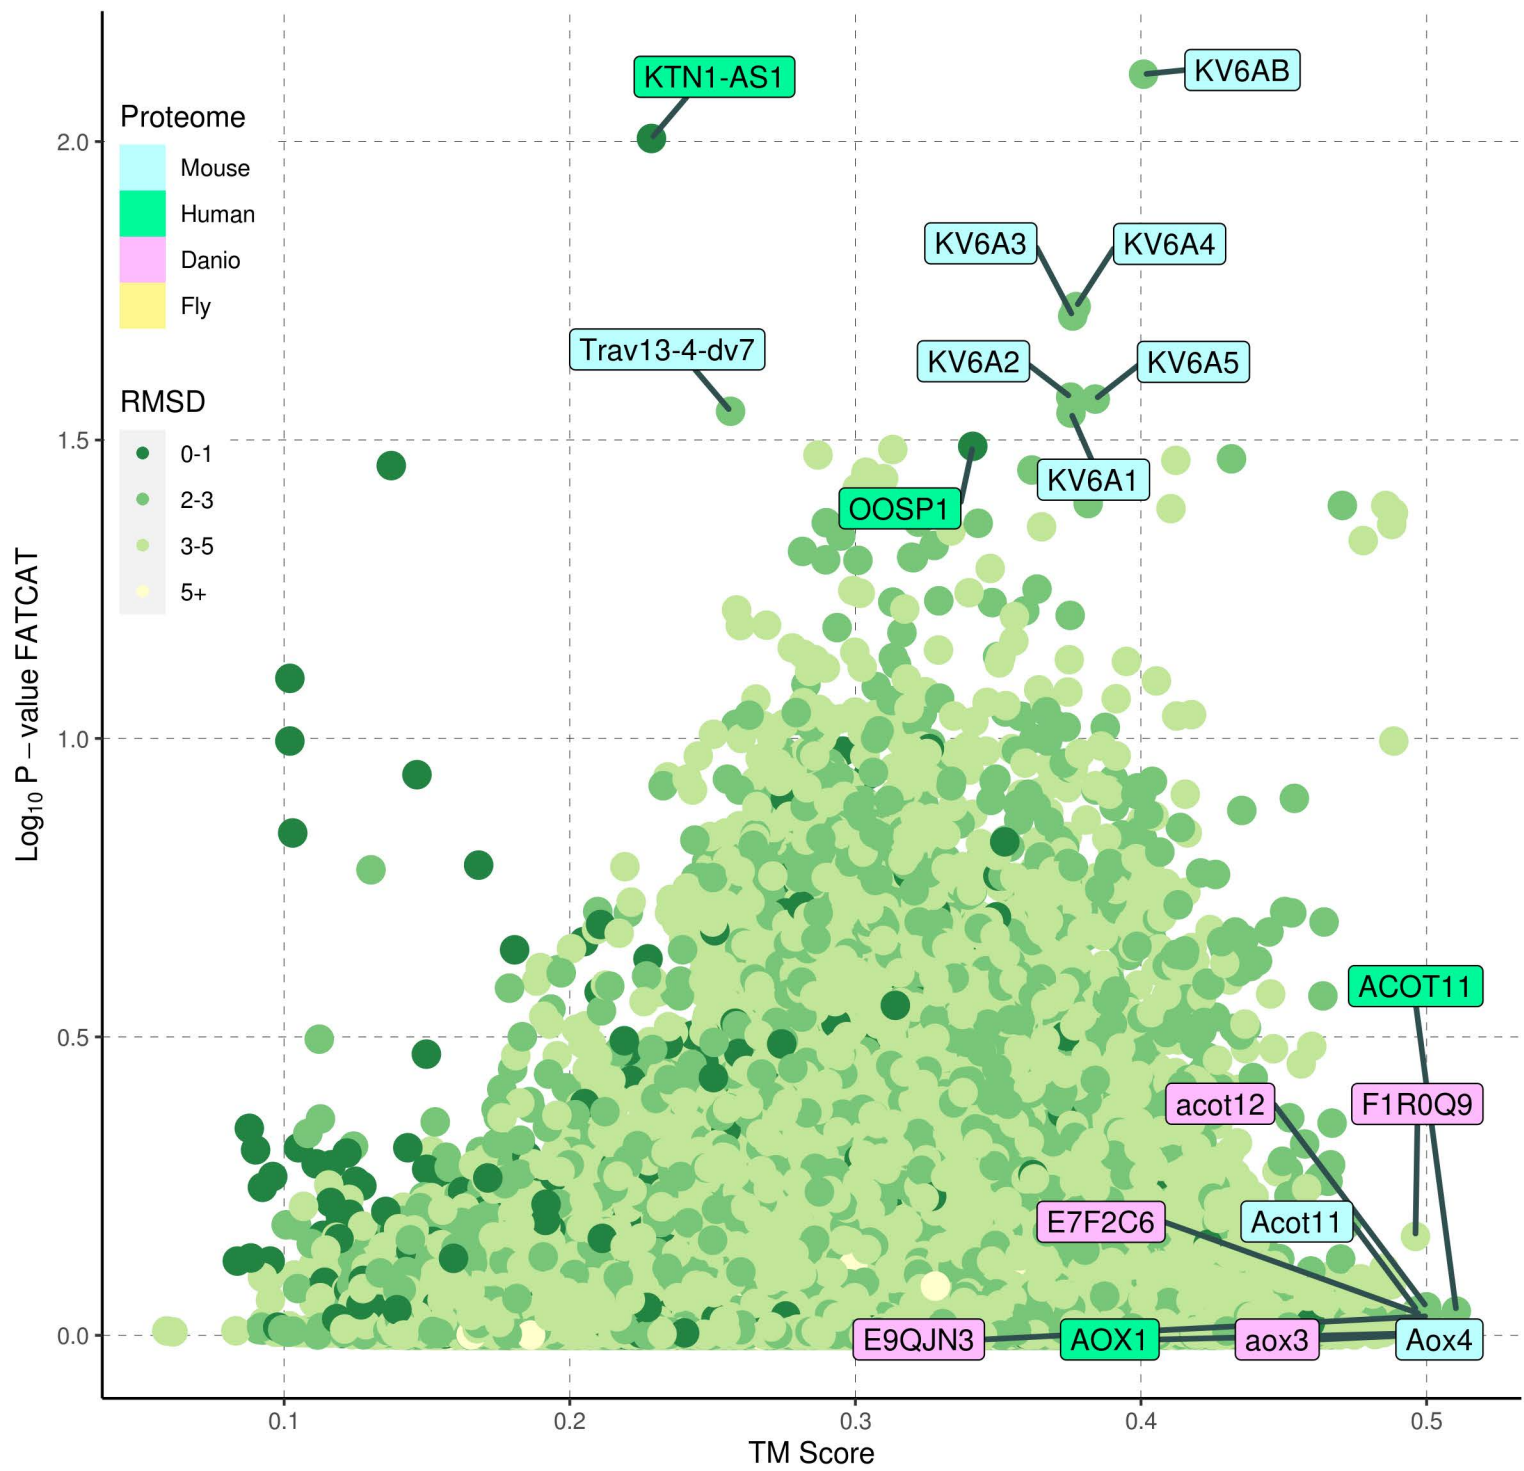

C23 : No hits, top-scoring values are indicated

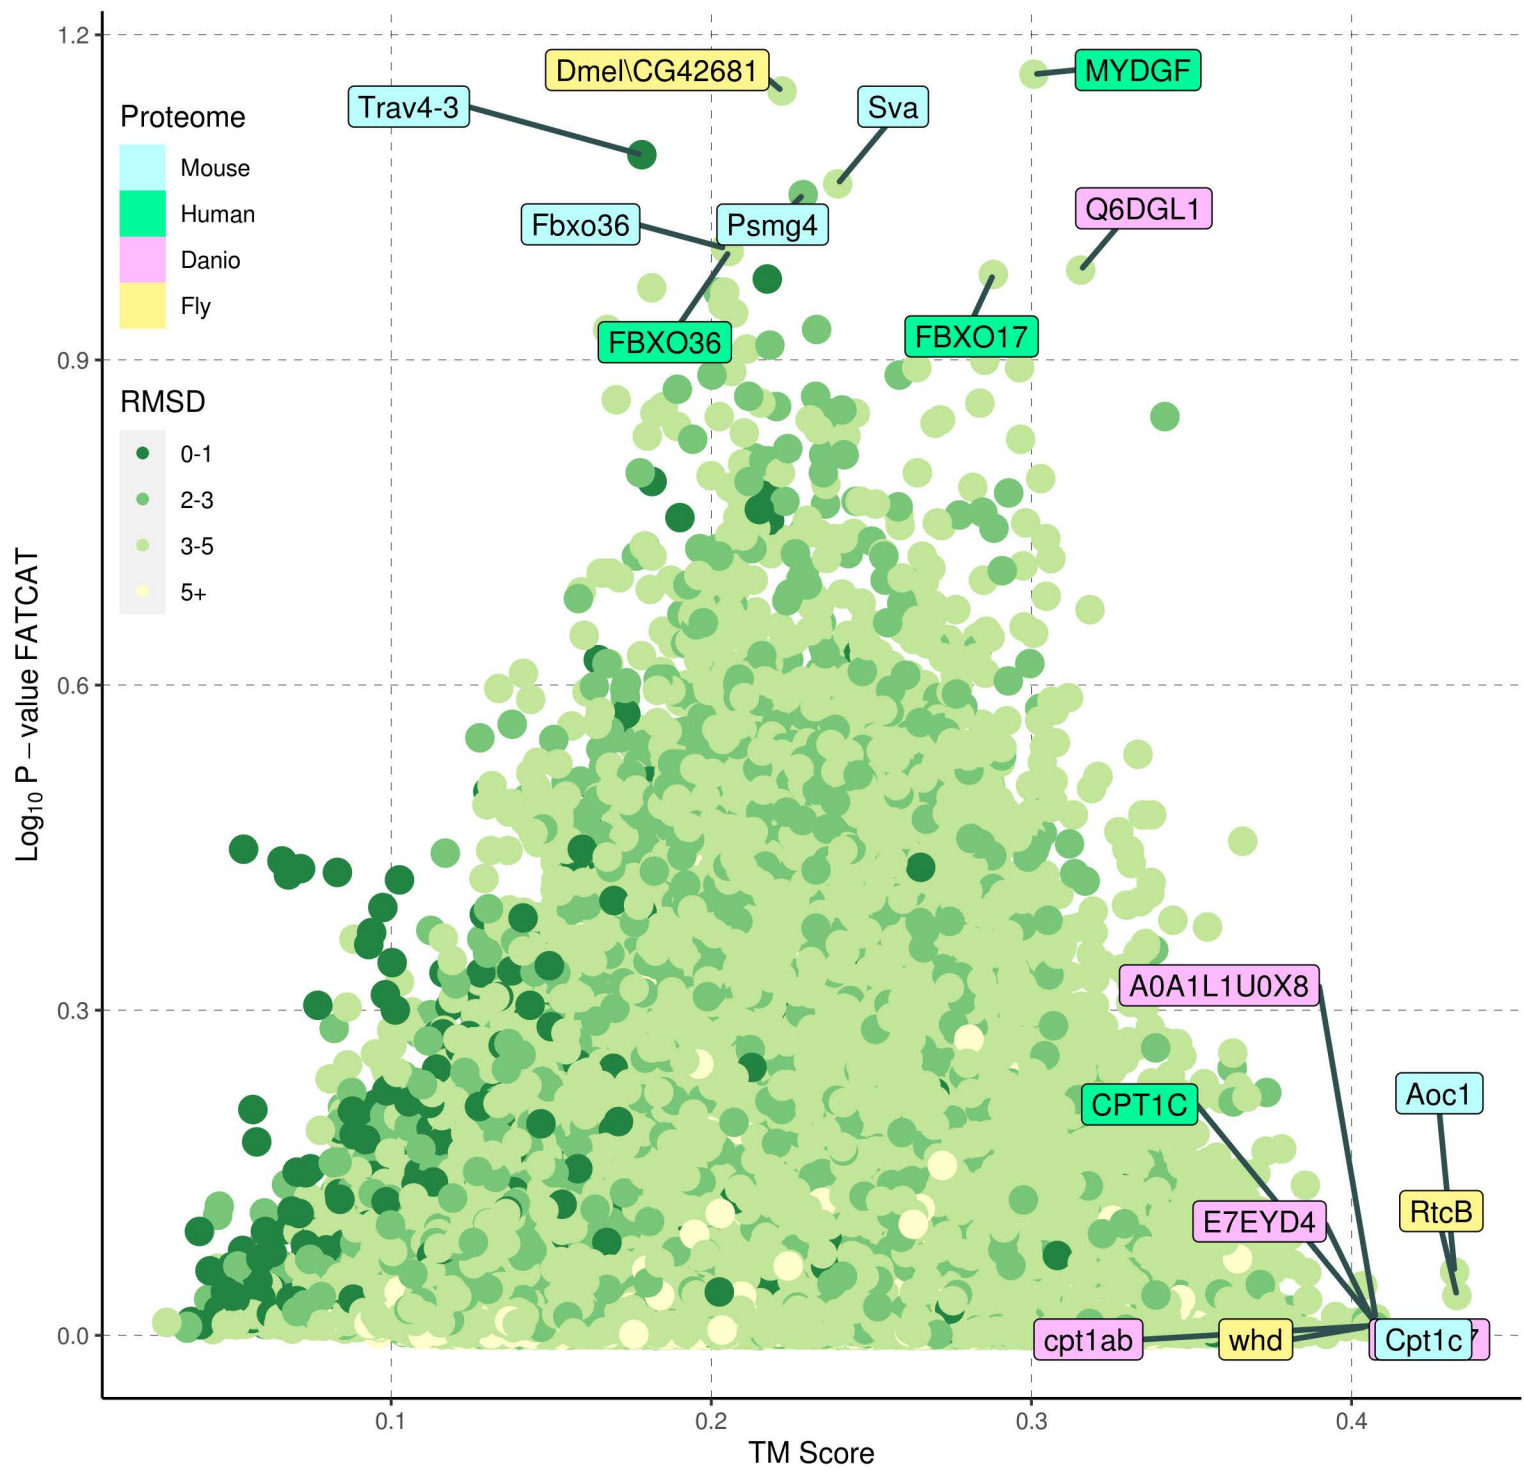



CorfA : No hits, top-scoring values are indicated

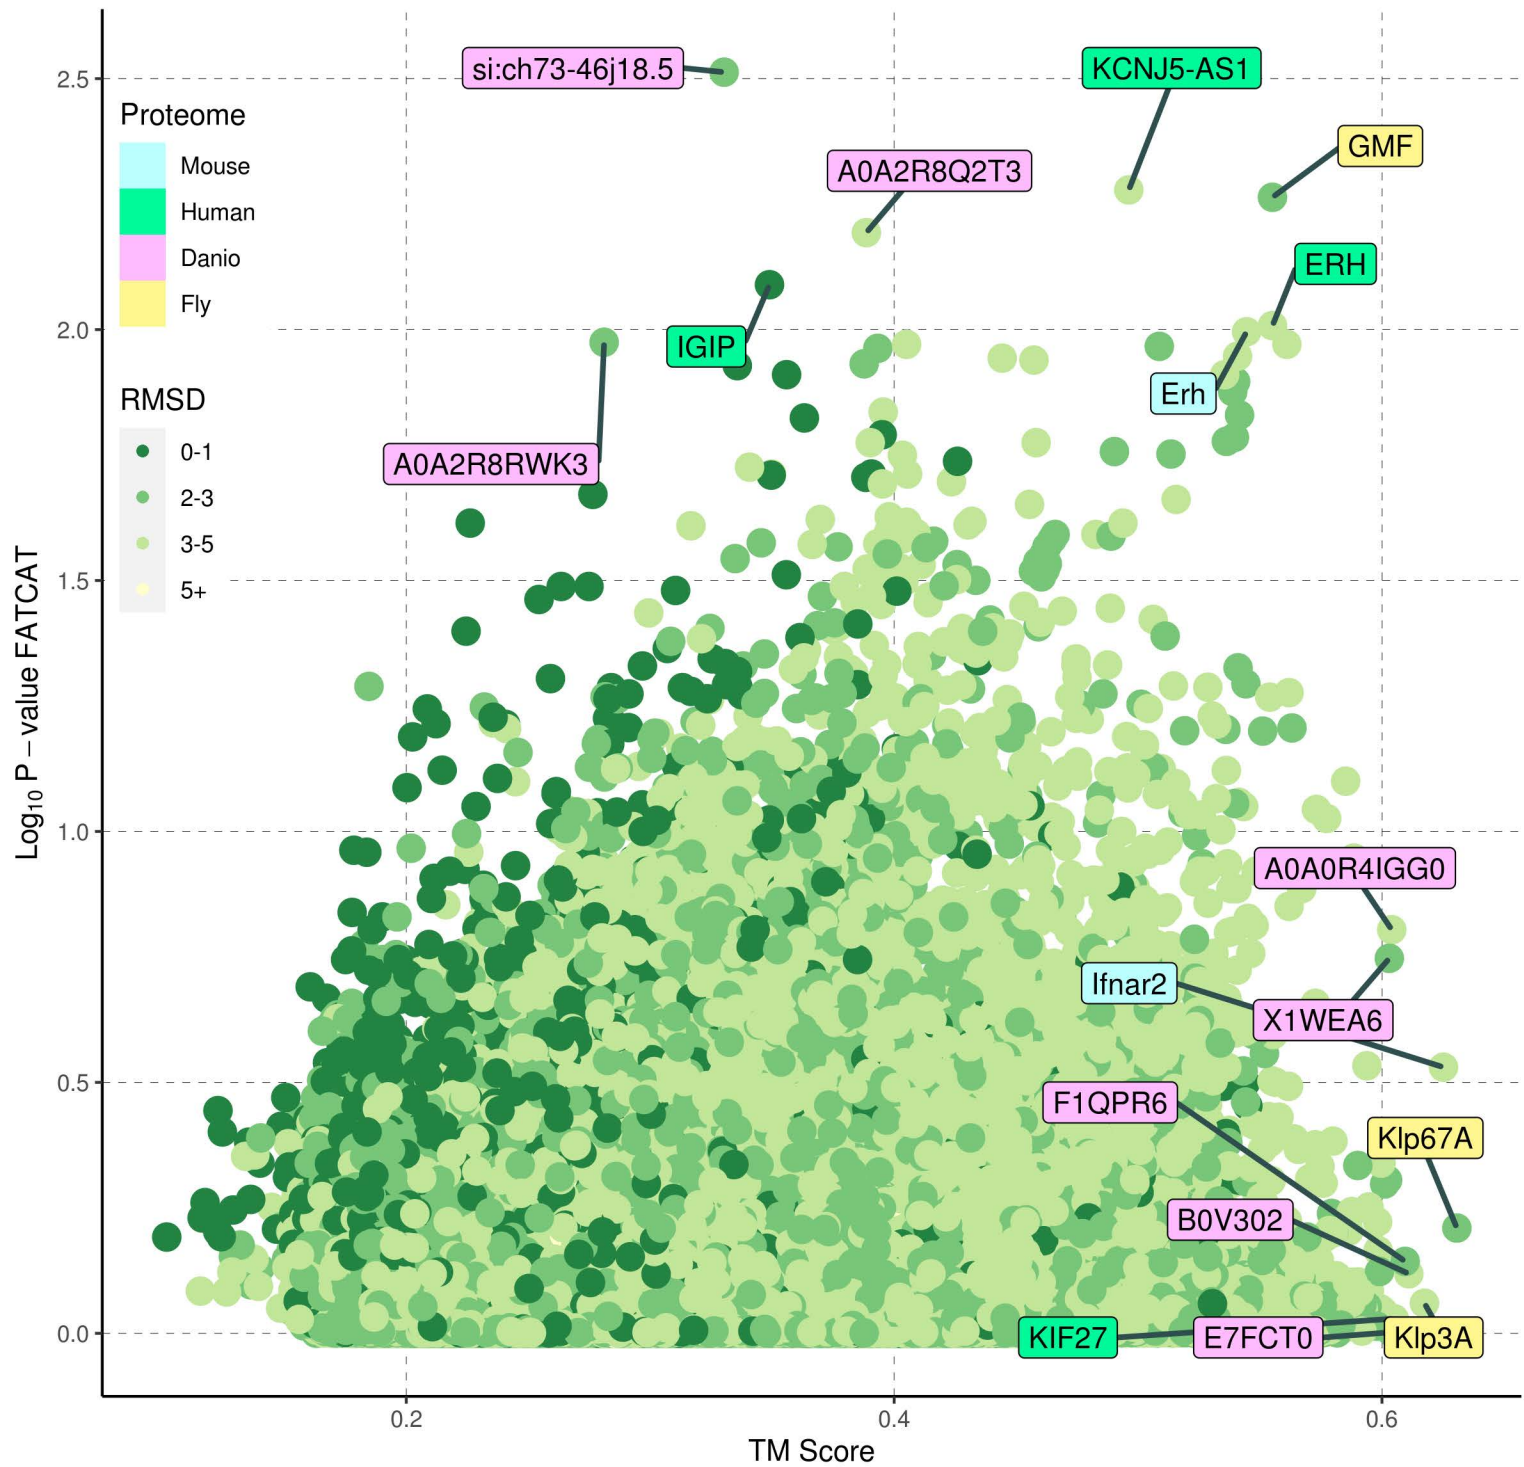

## CorfB

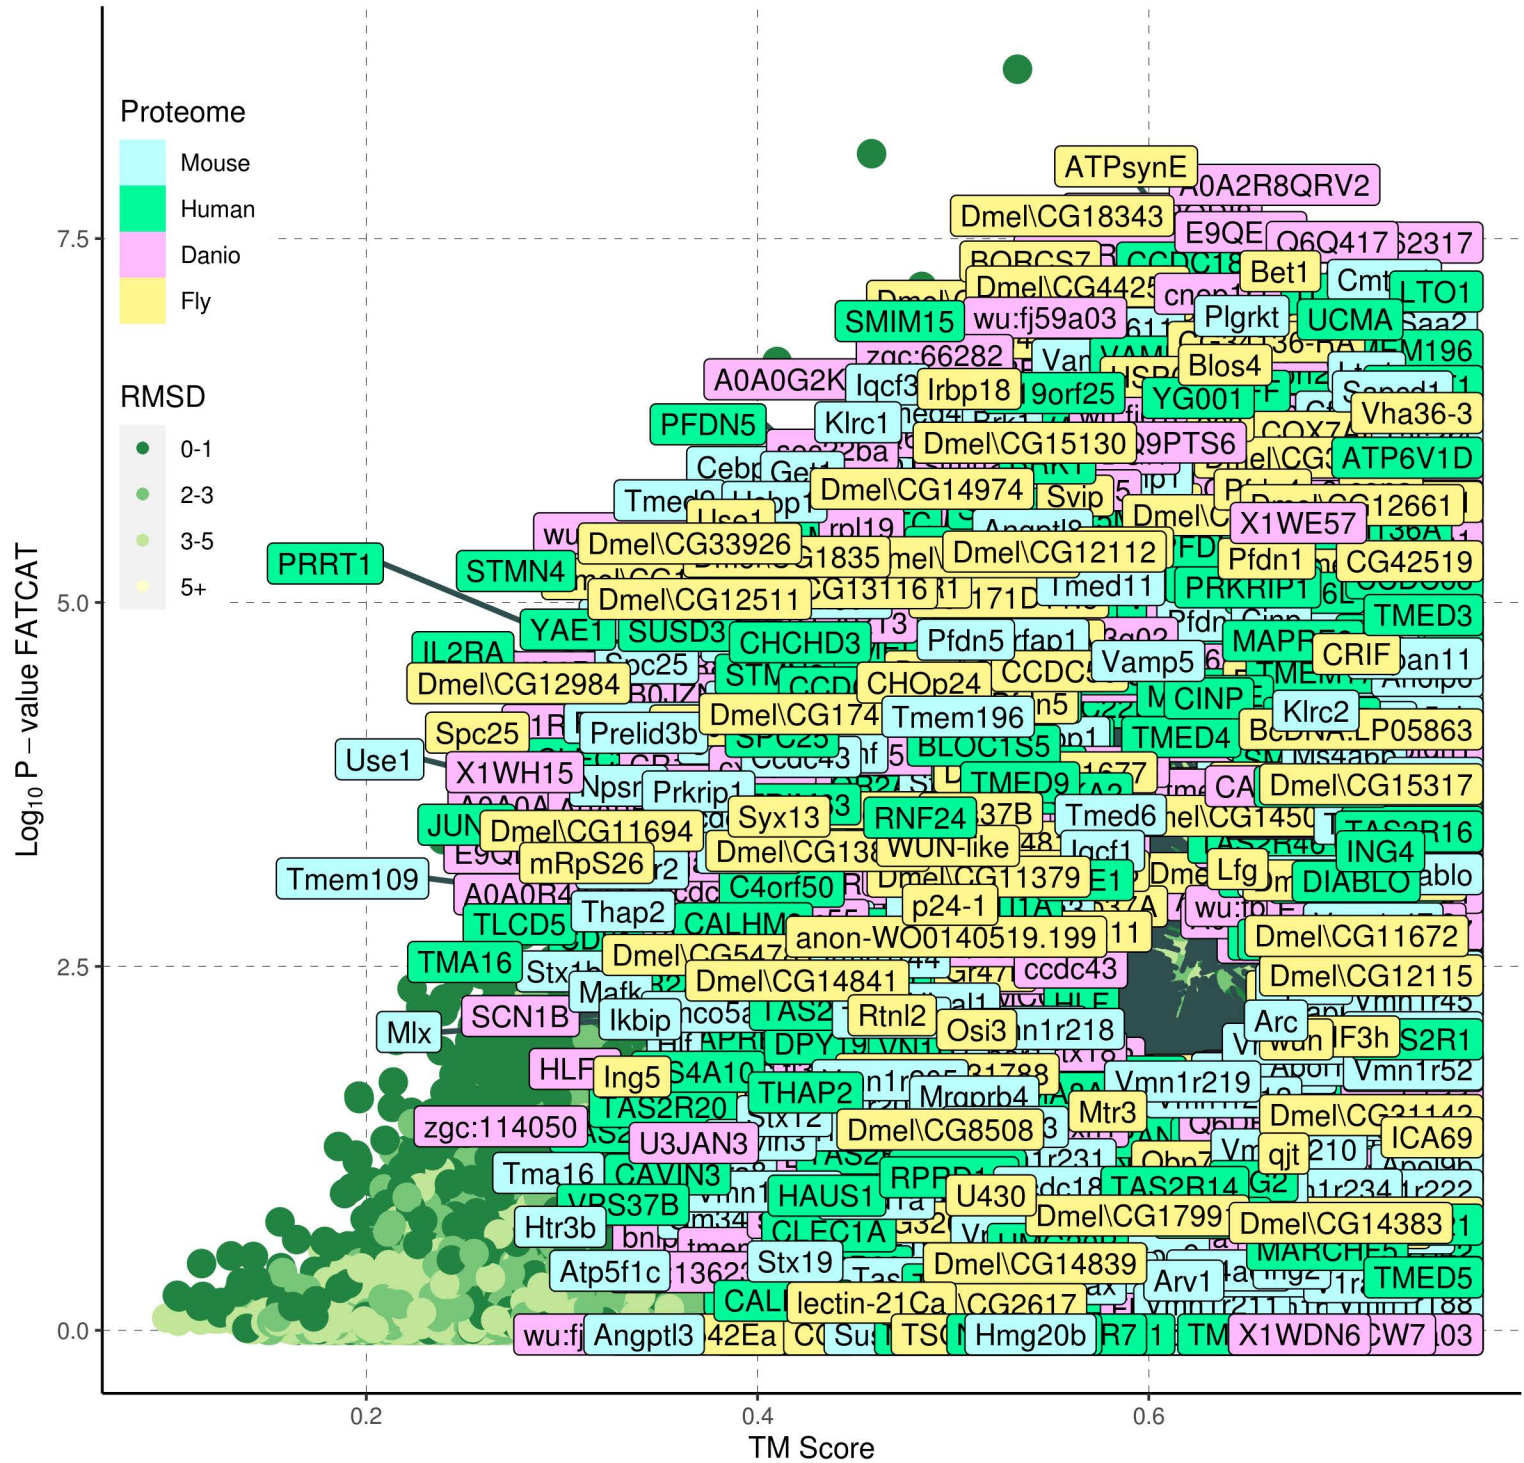



# CorfD

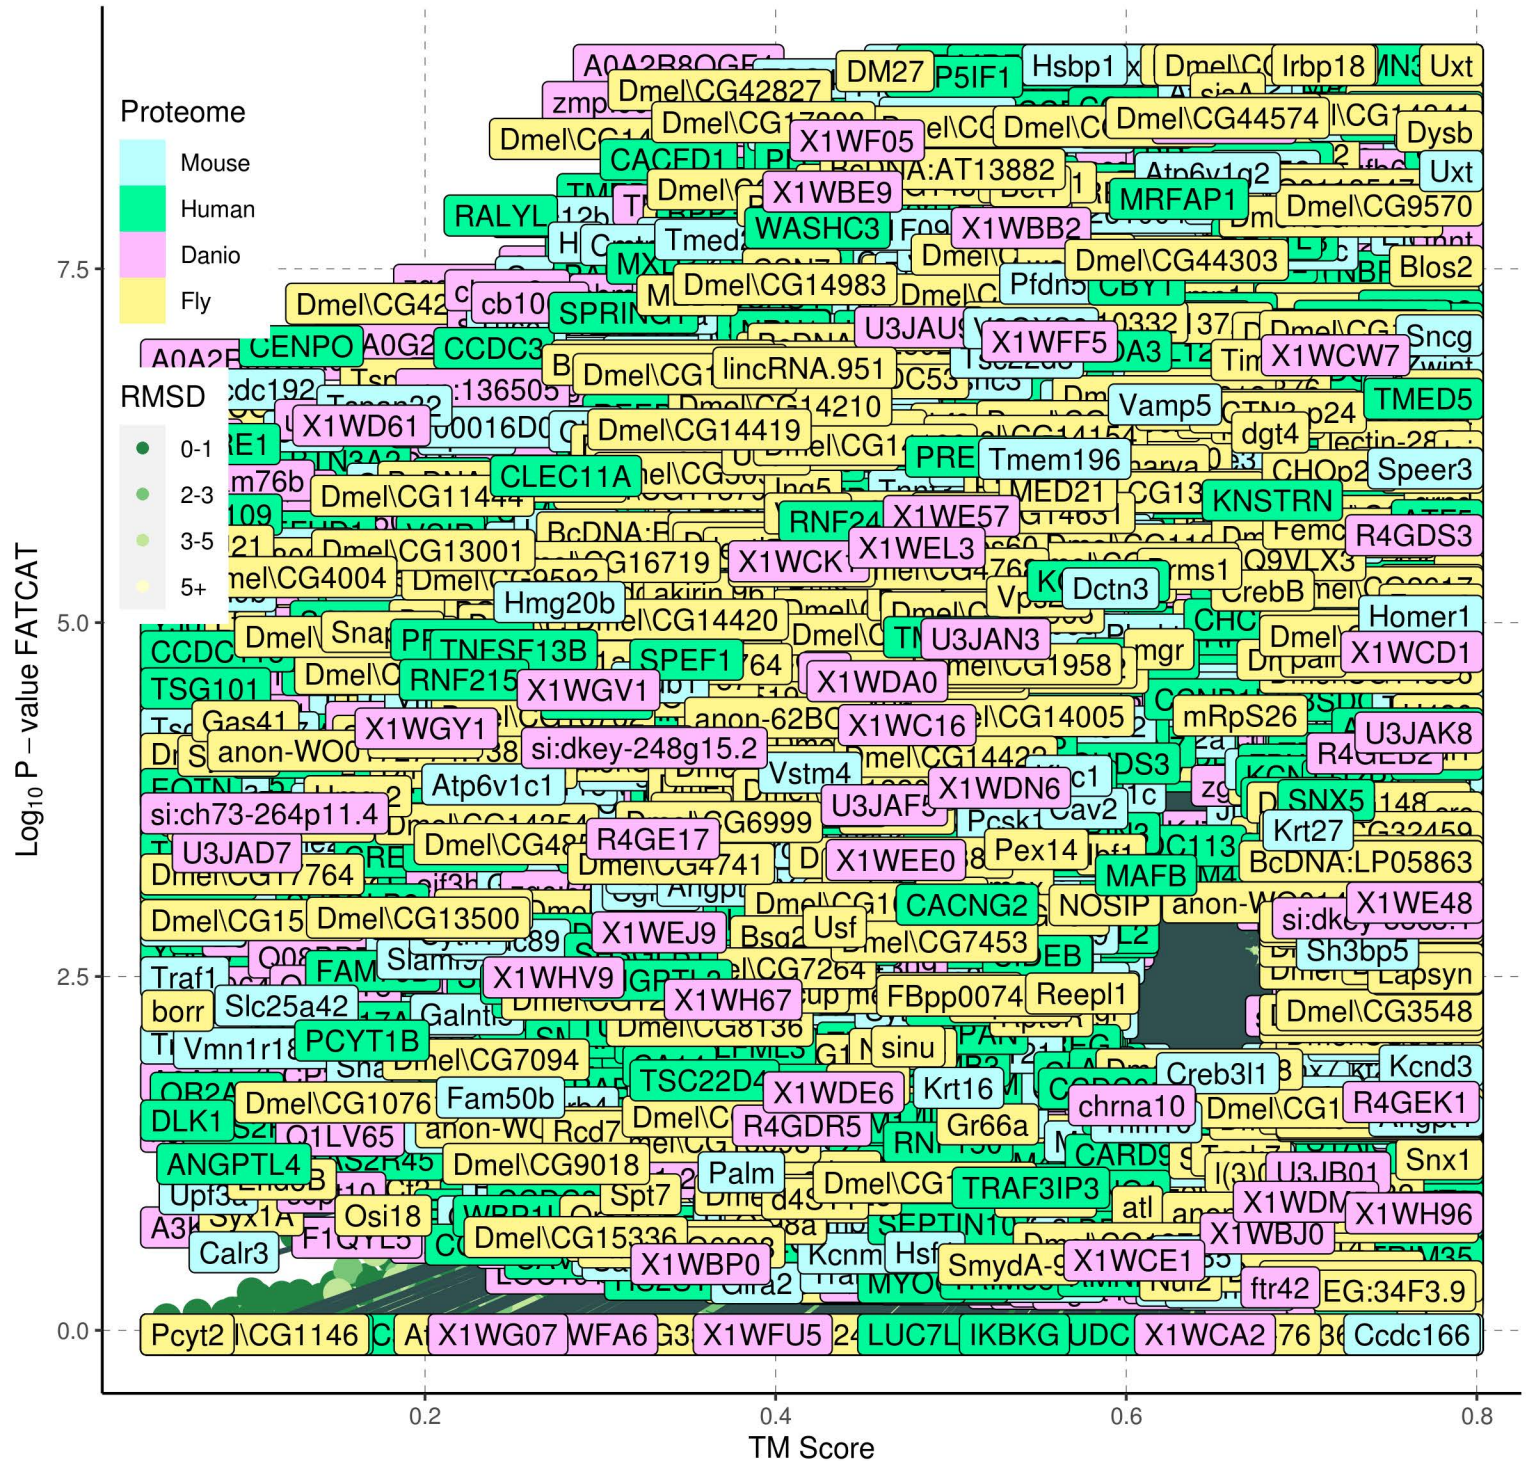

# CorfE

Log<sub>10</sub> P - value FATCAT

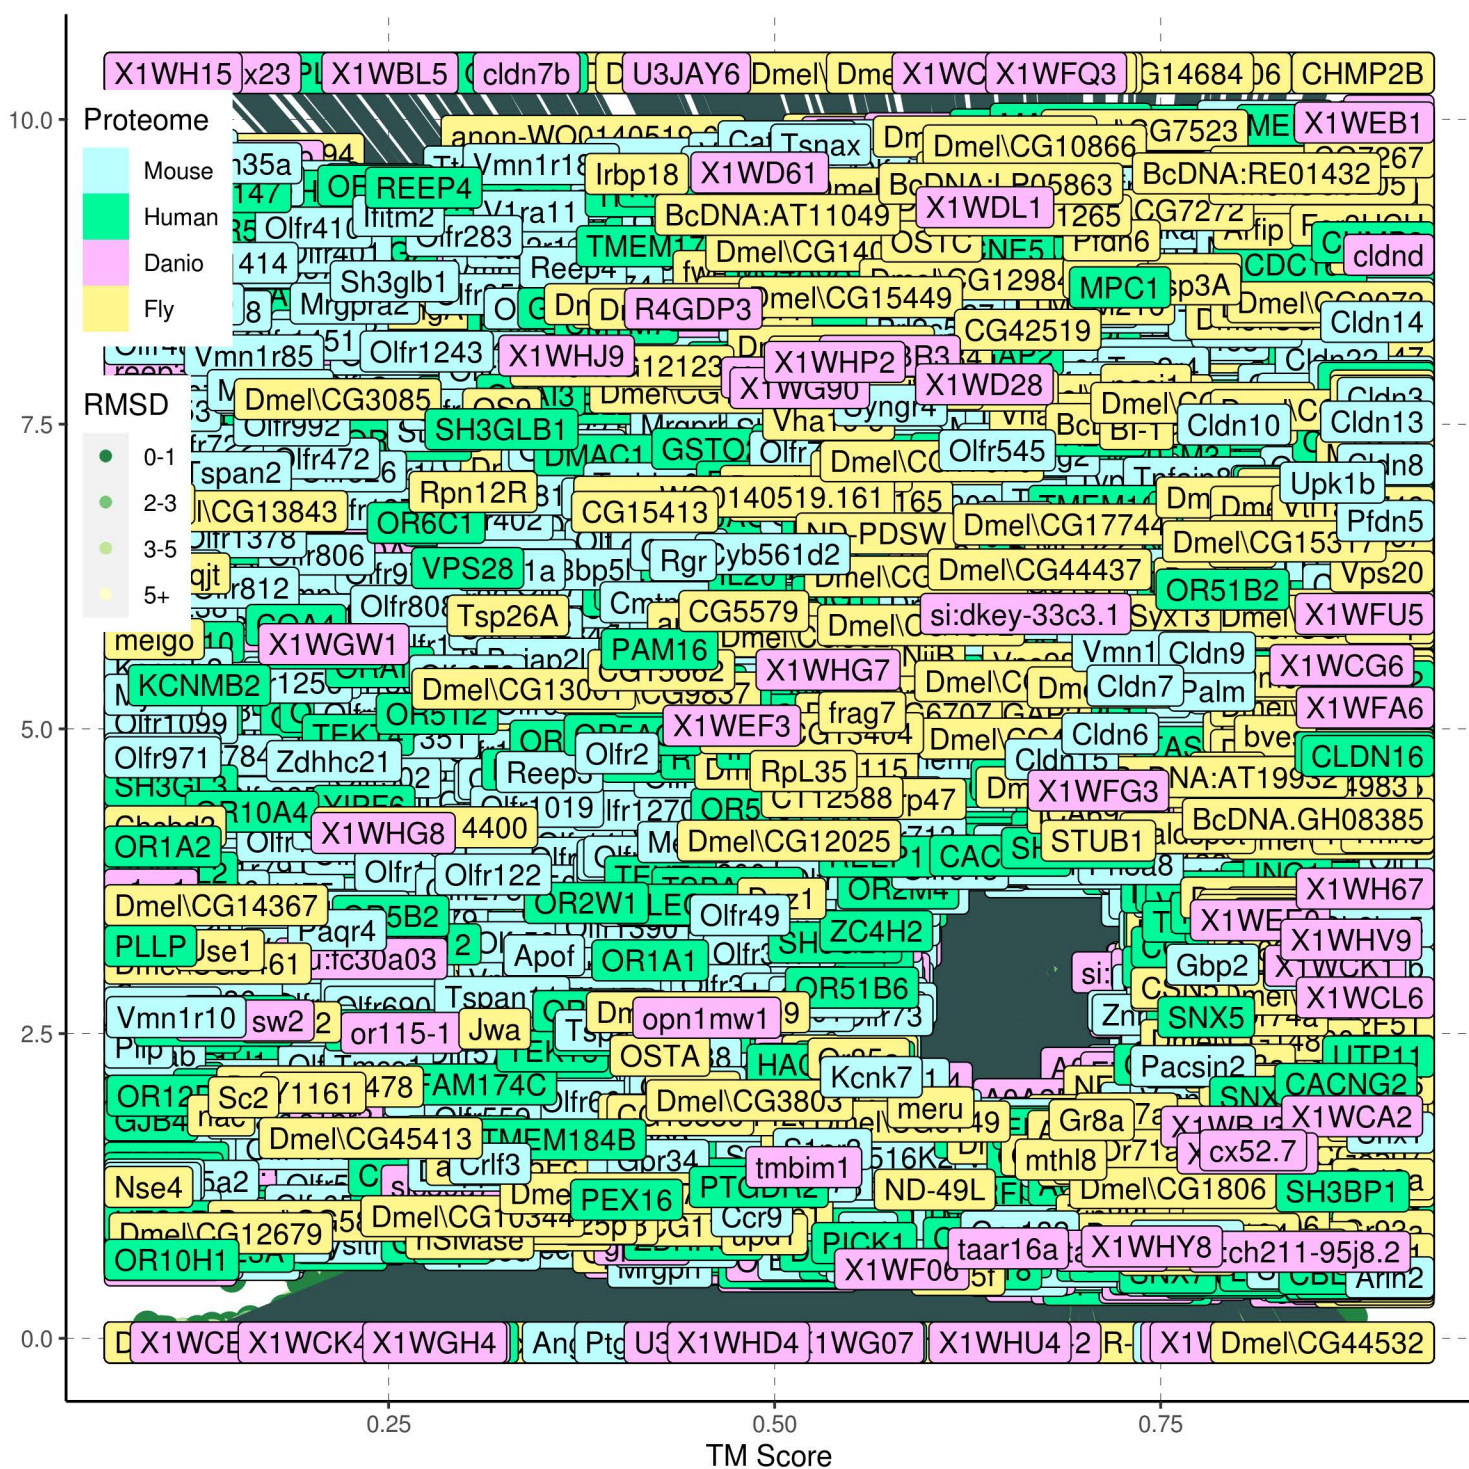

D1 : No hits, top-scoring values are indicated

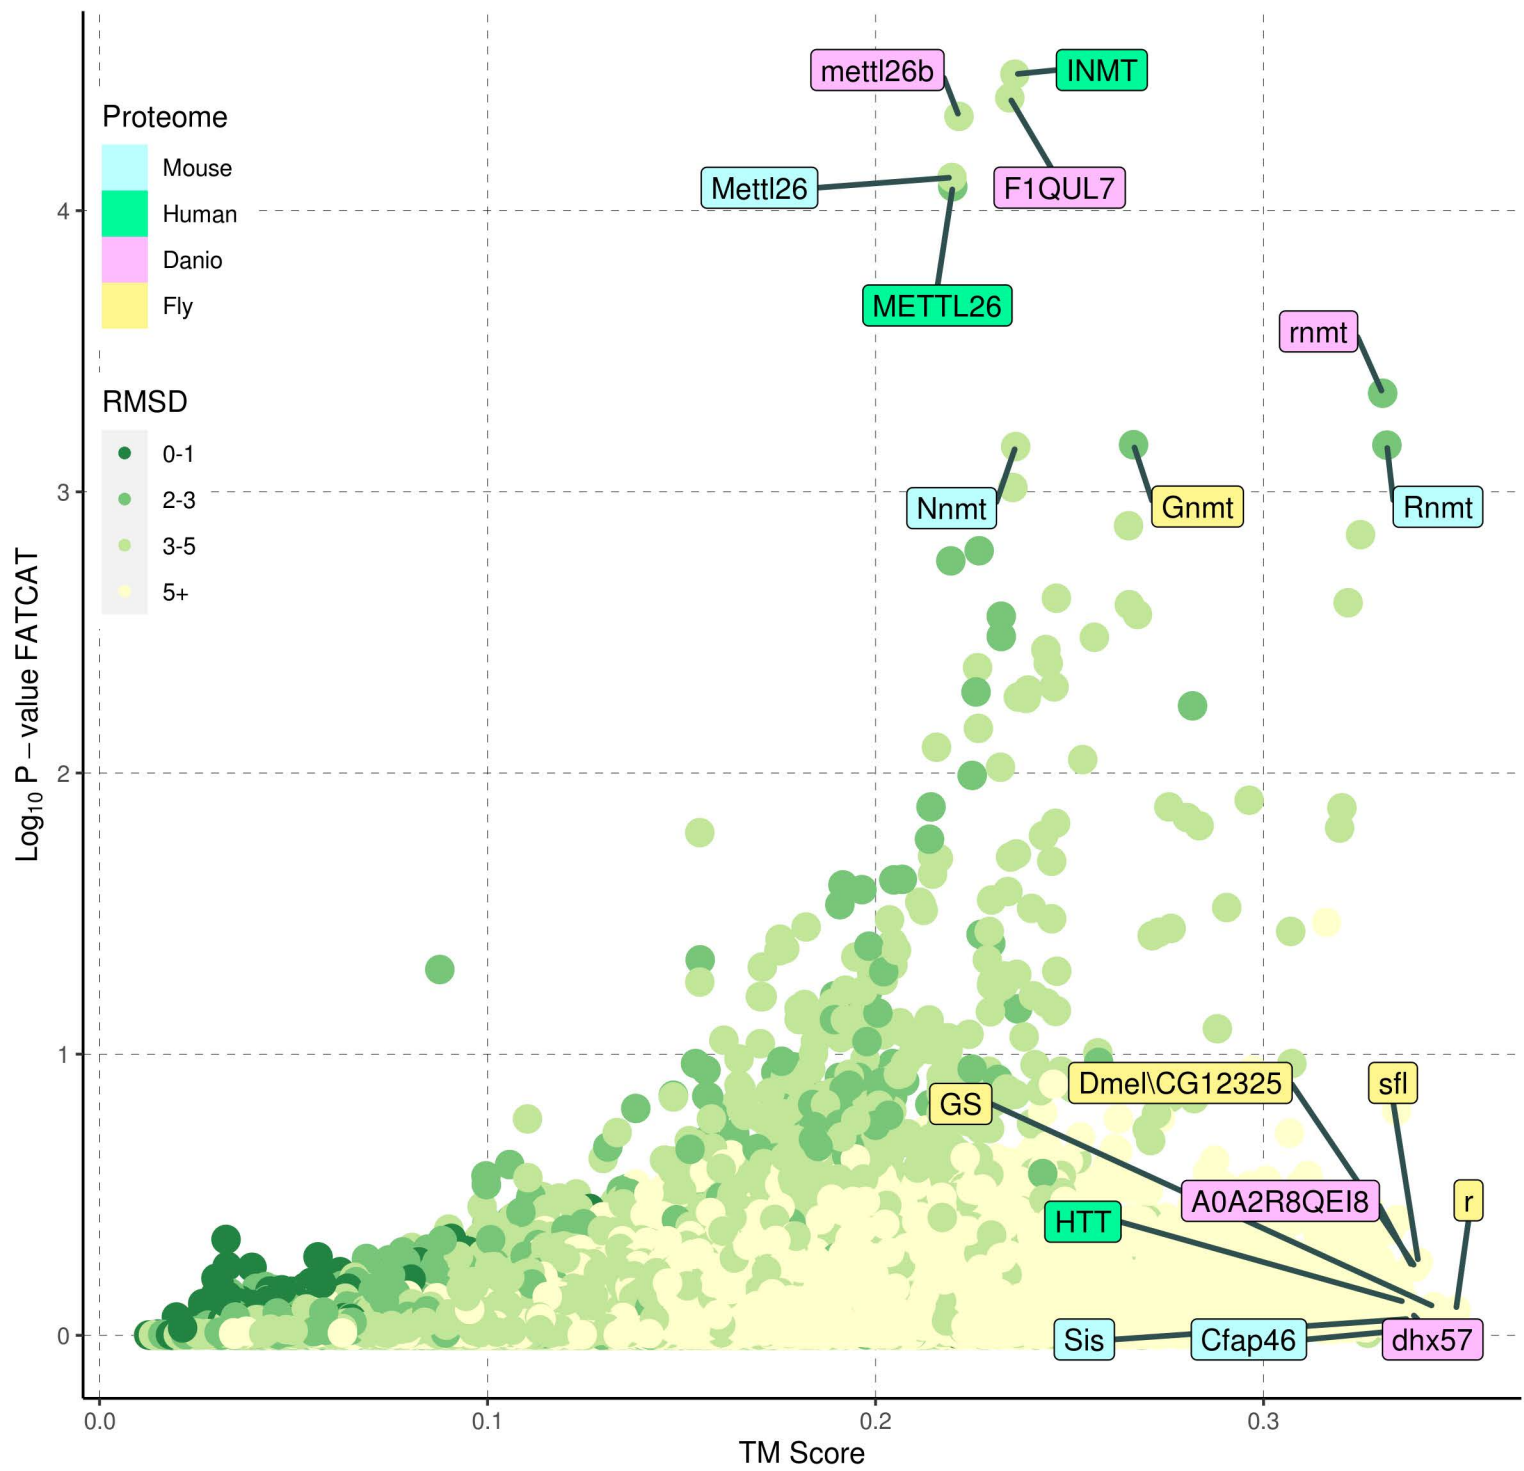

D2 : No hits, top-scoring values are indicated

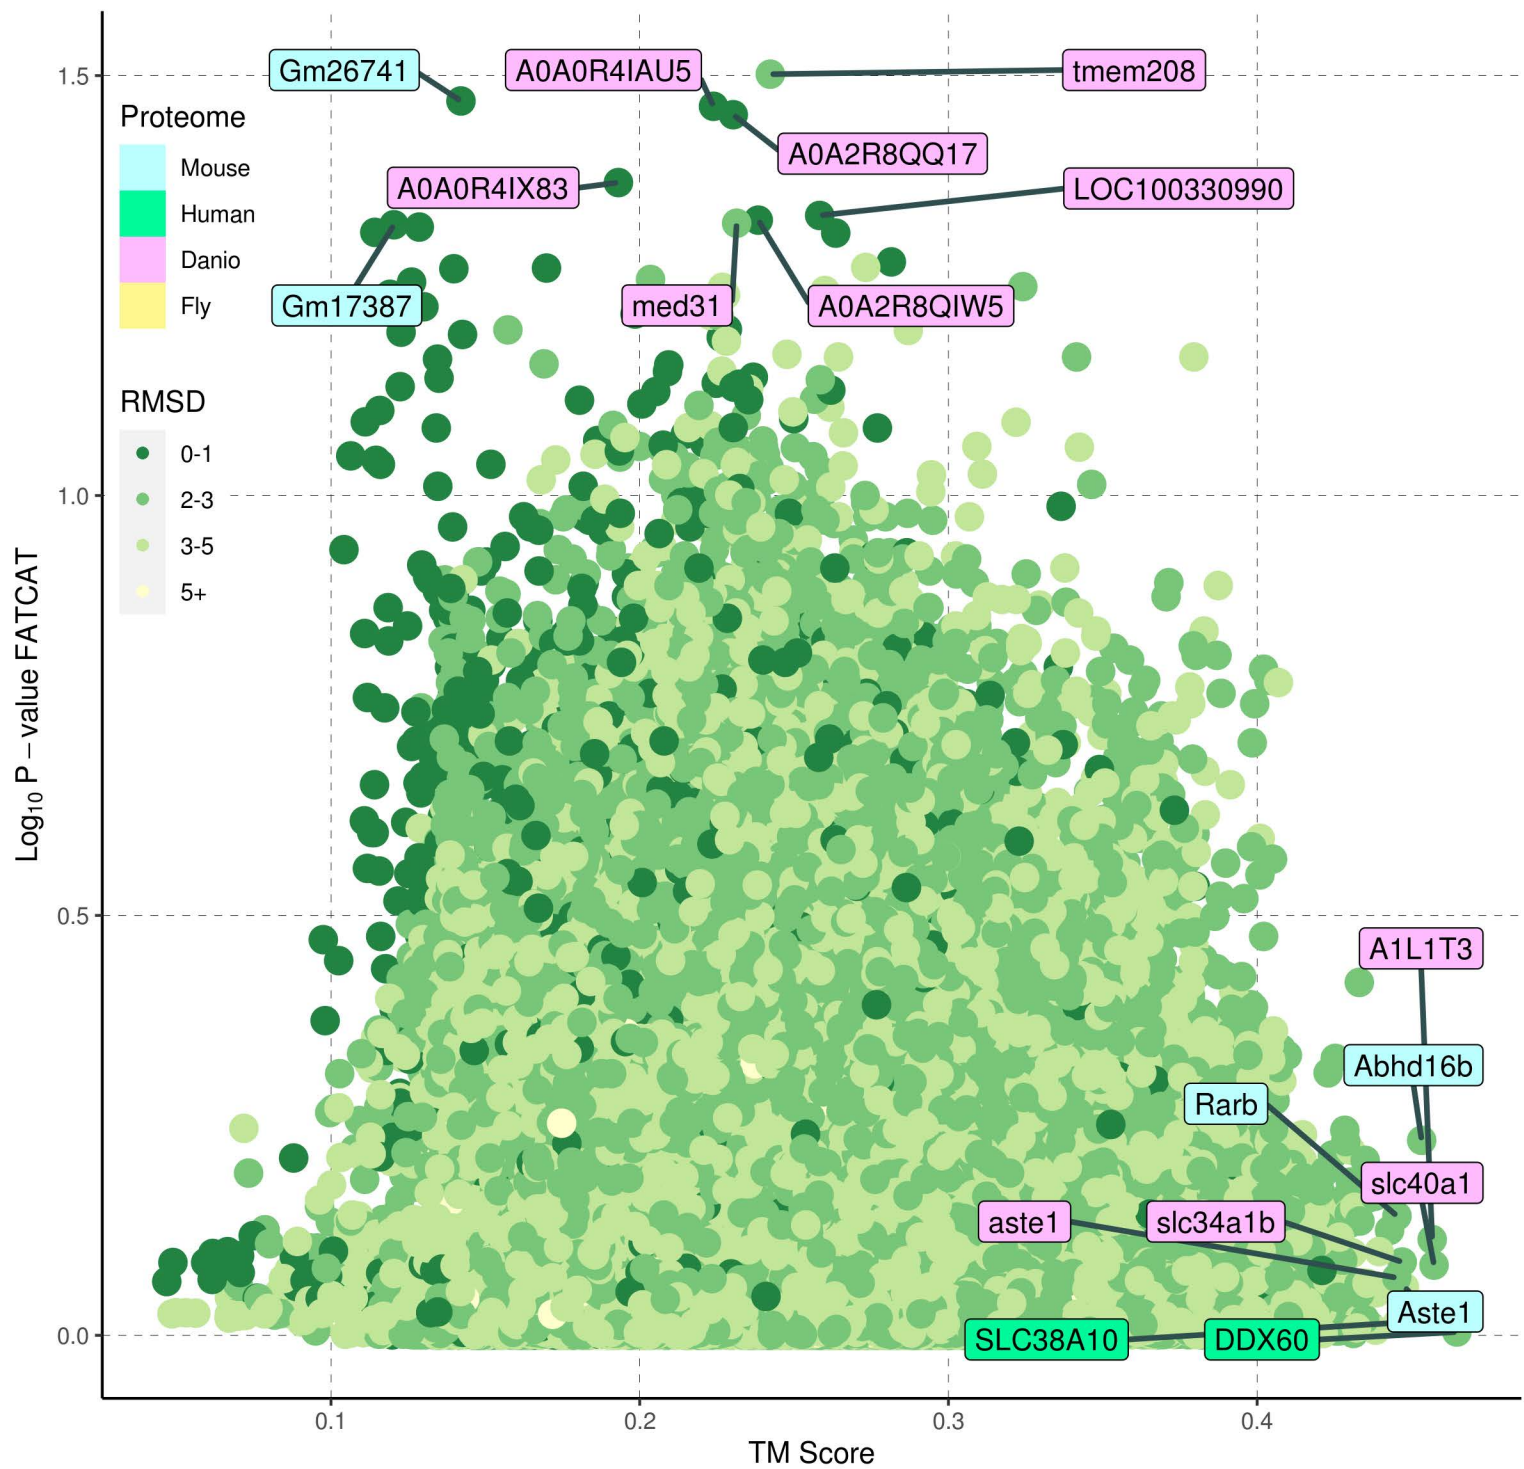

D3 : No hits, top-scoring values are indicated

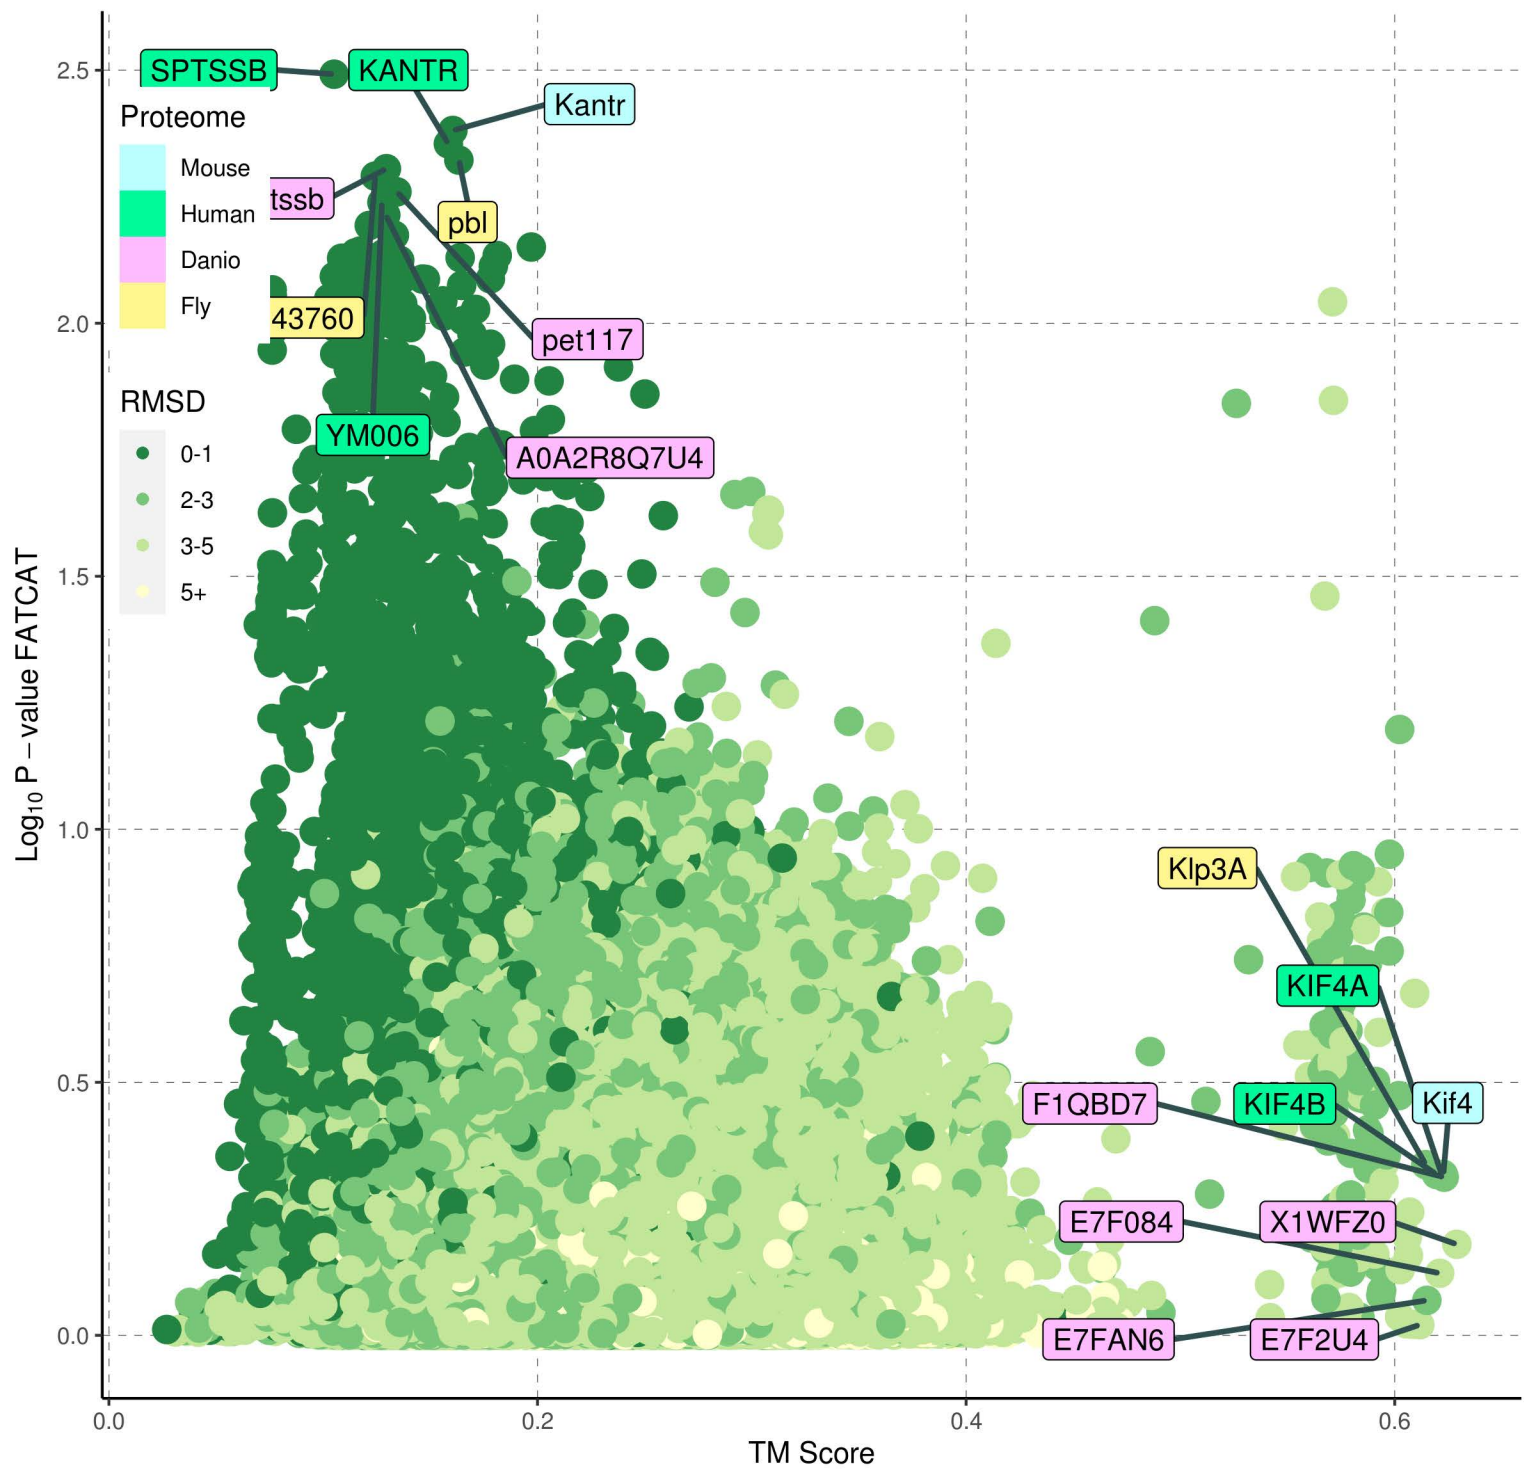



D4

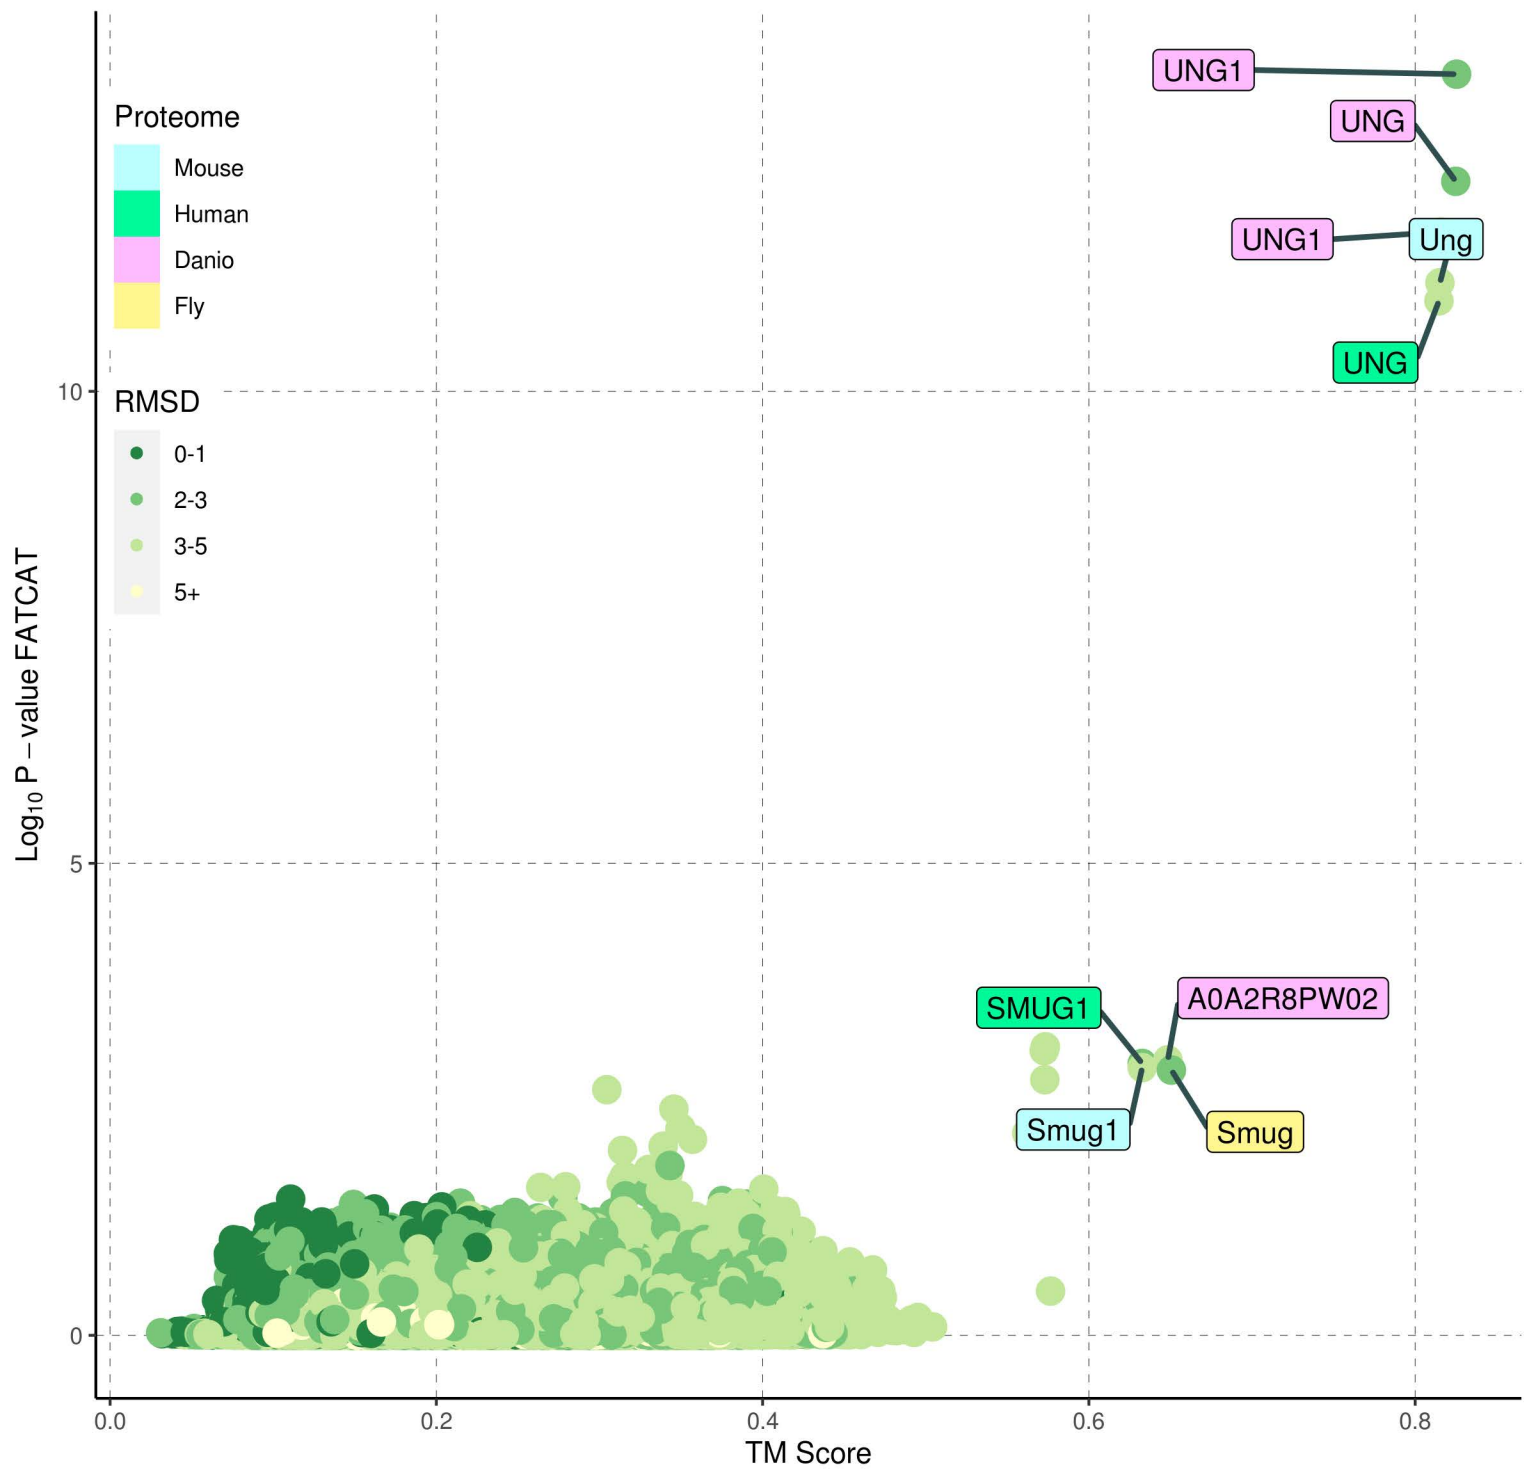

D5 : No hits, top-scoring values are indicated

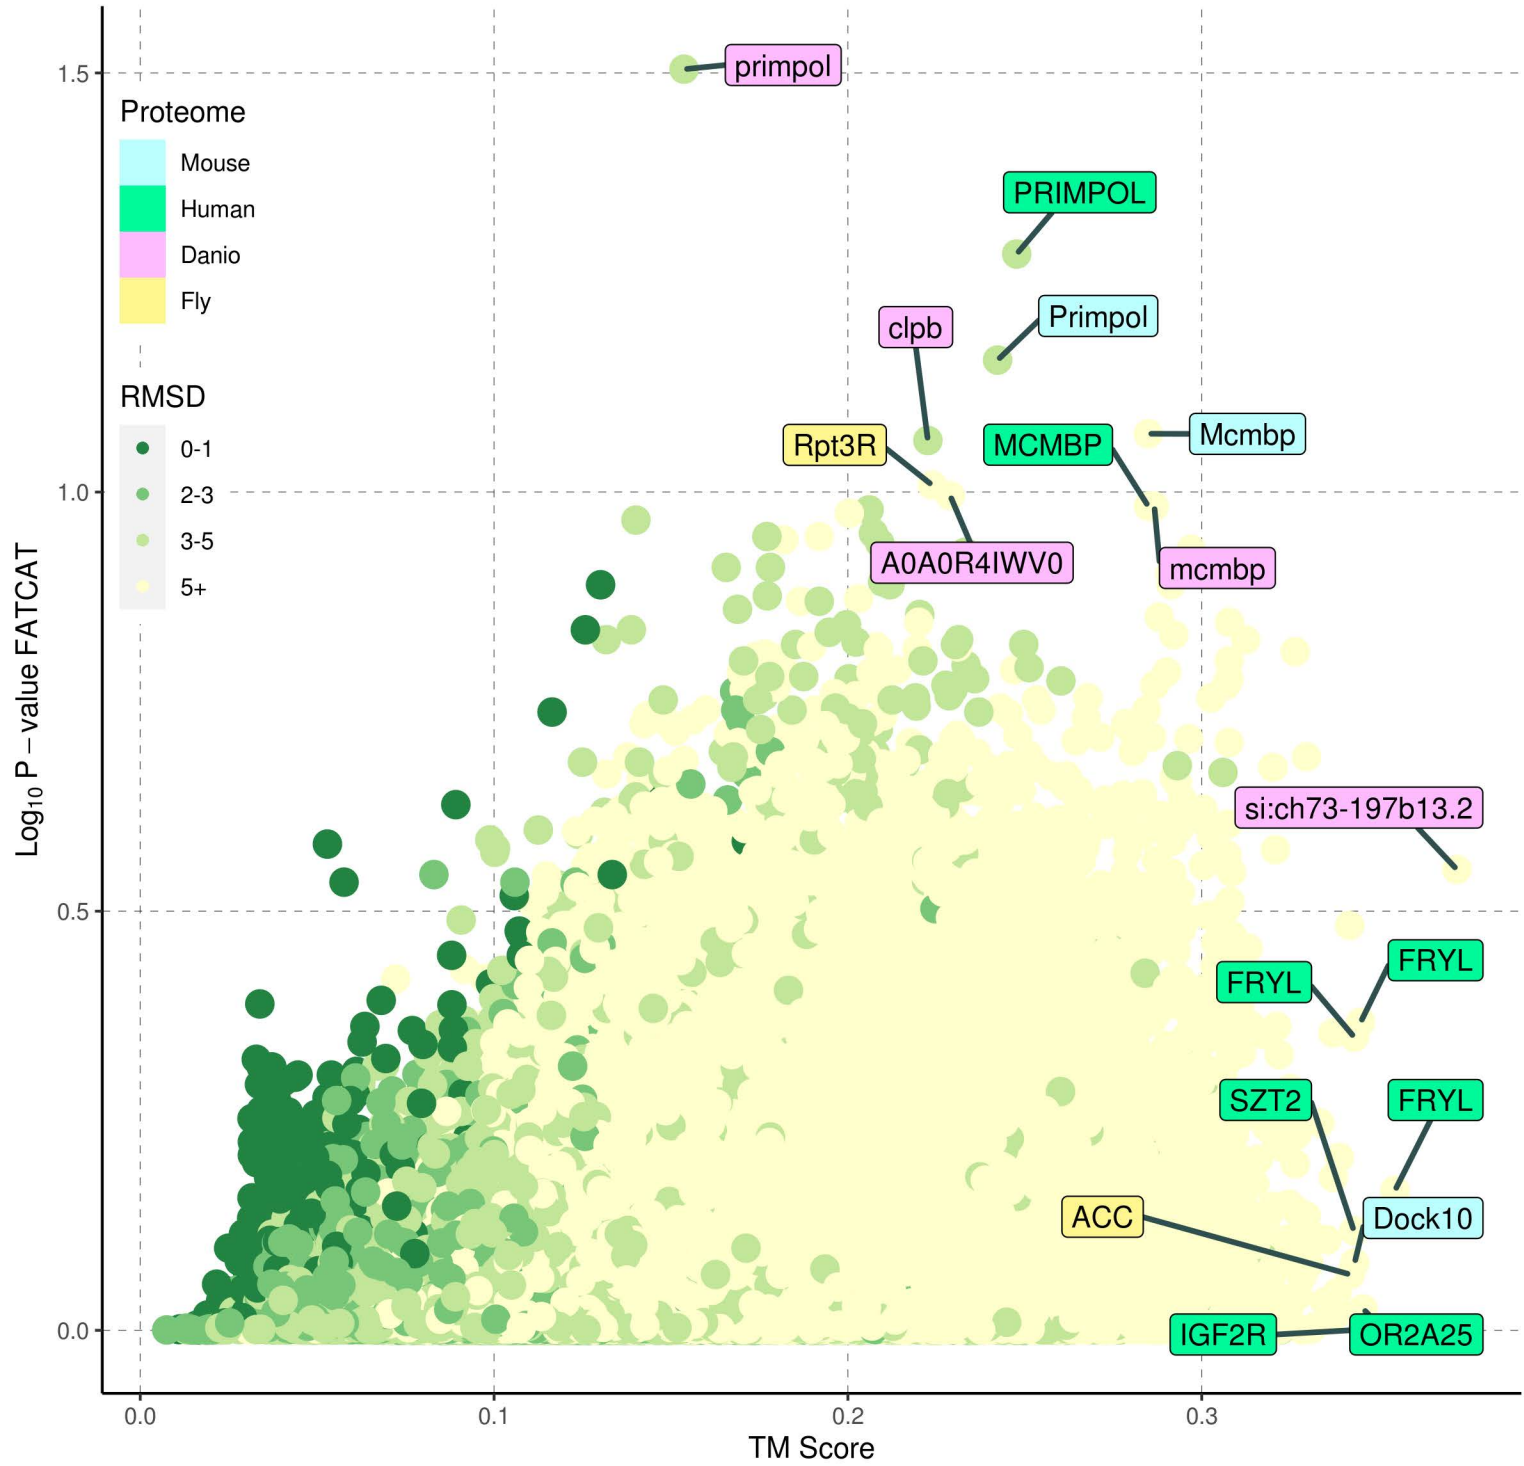

D6

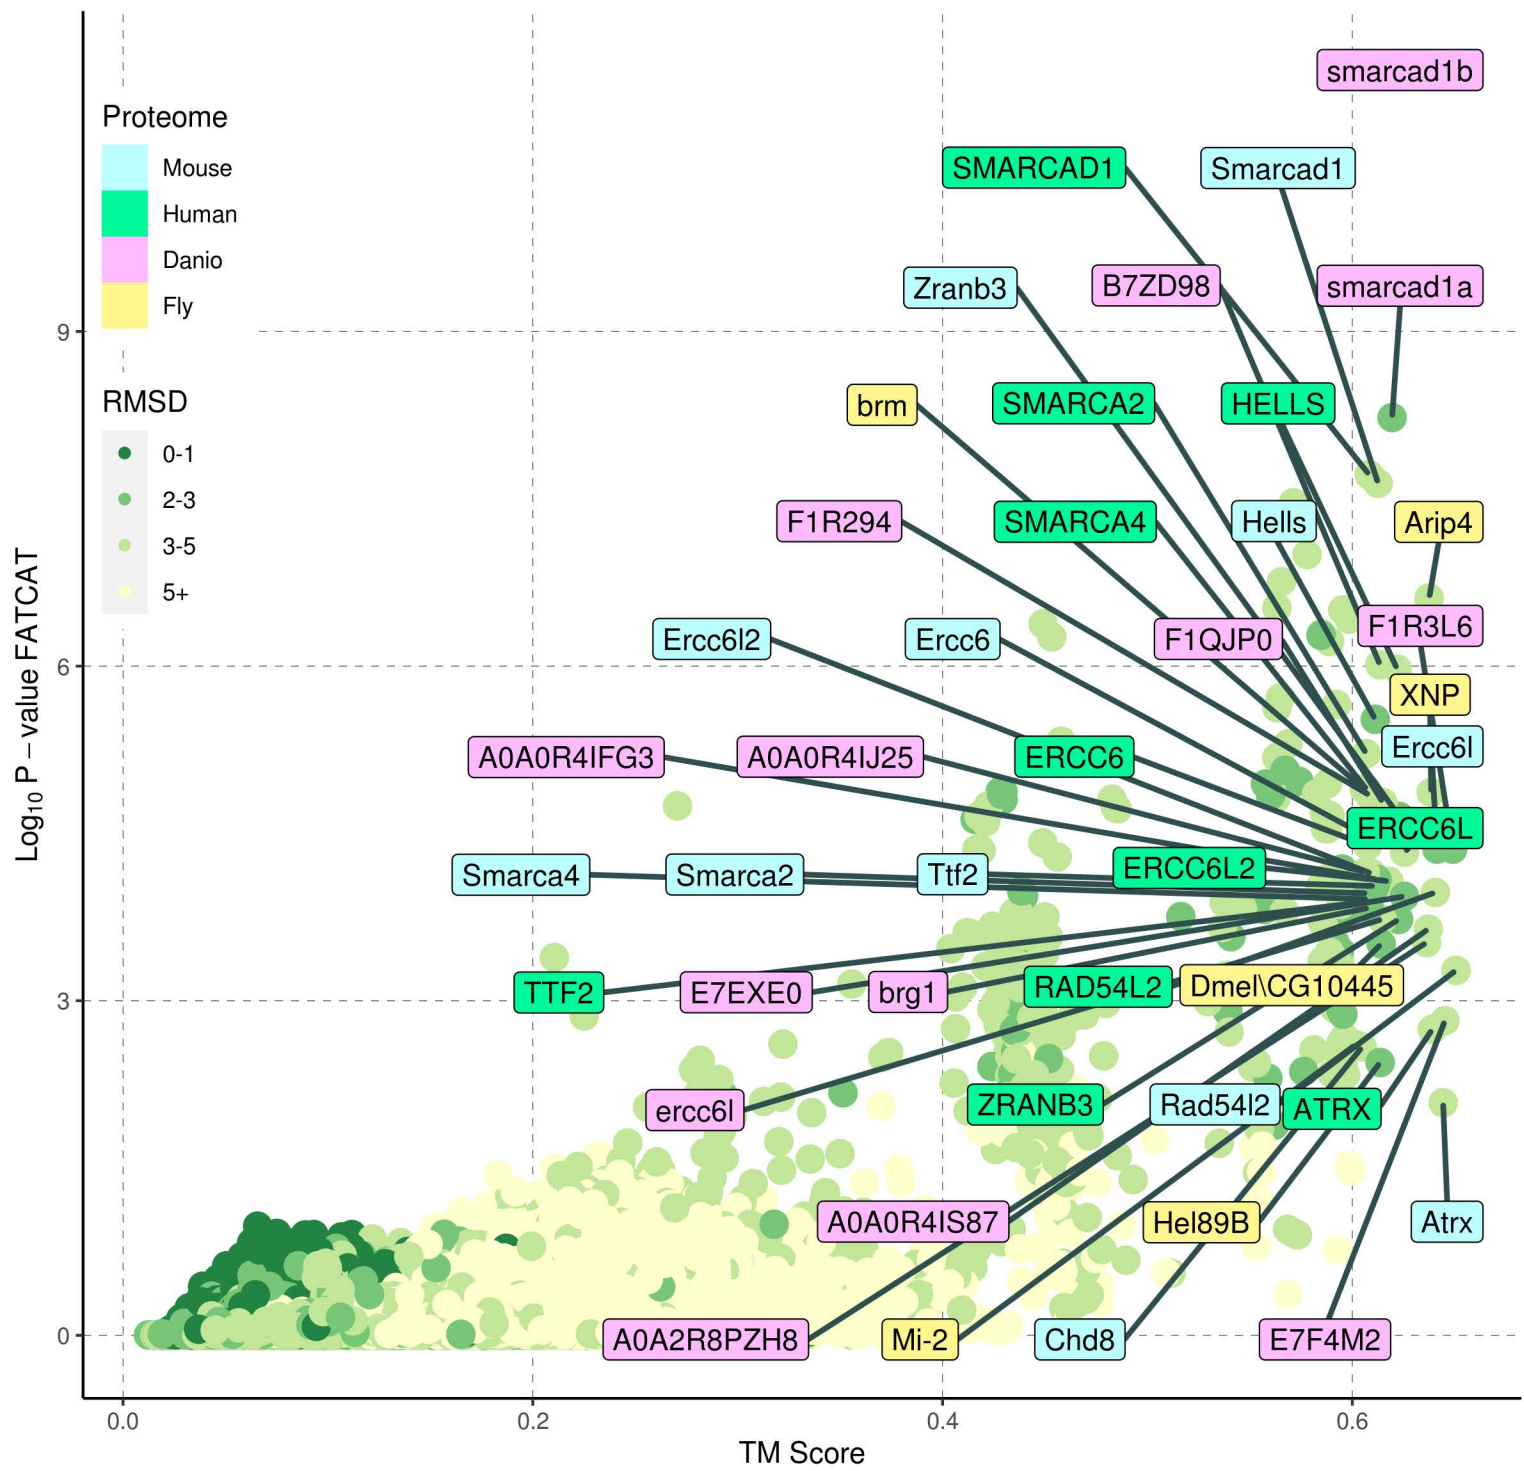

D7

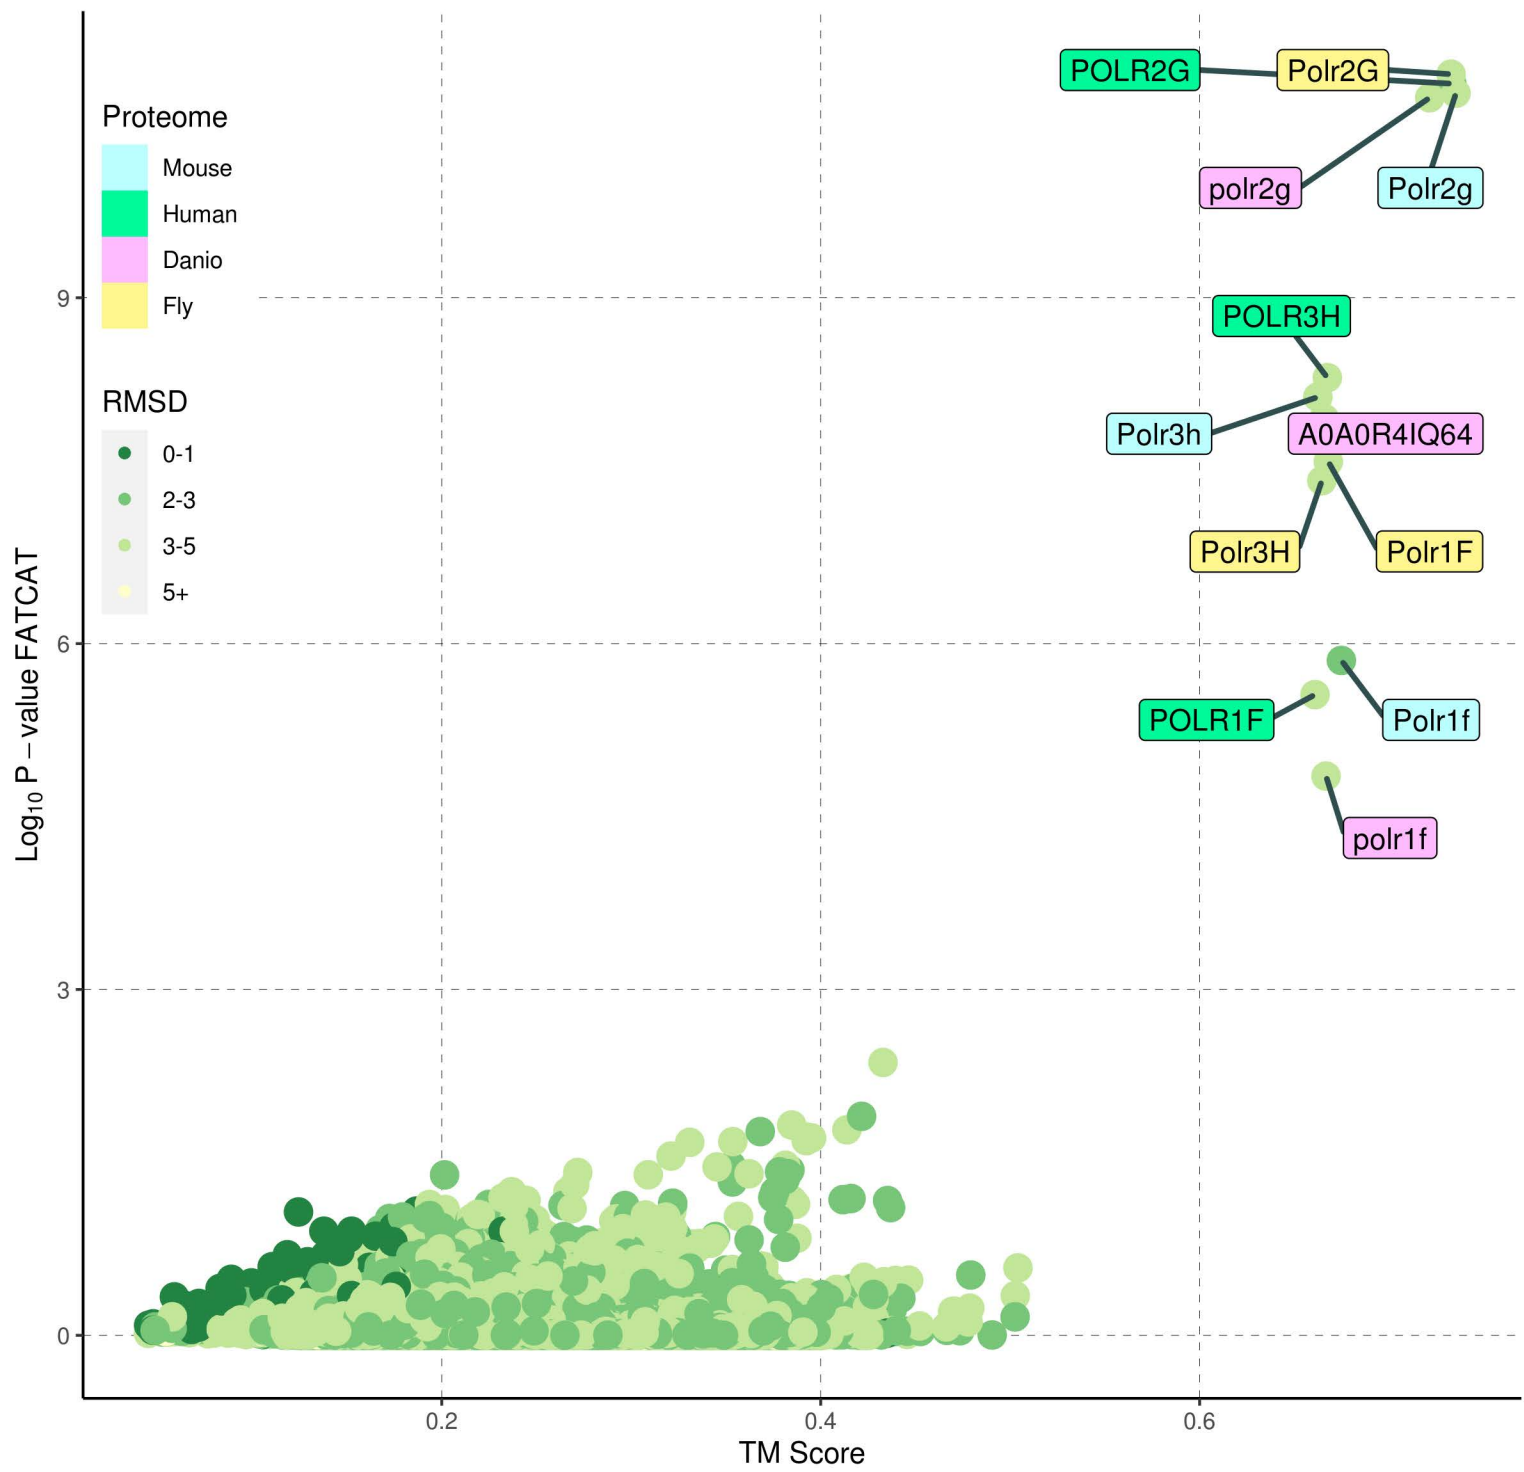

# D8

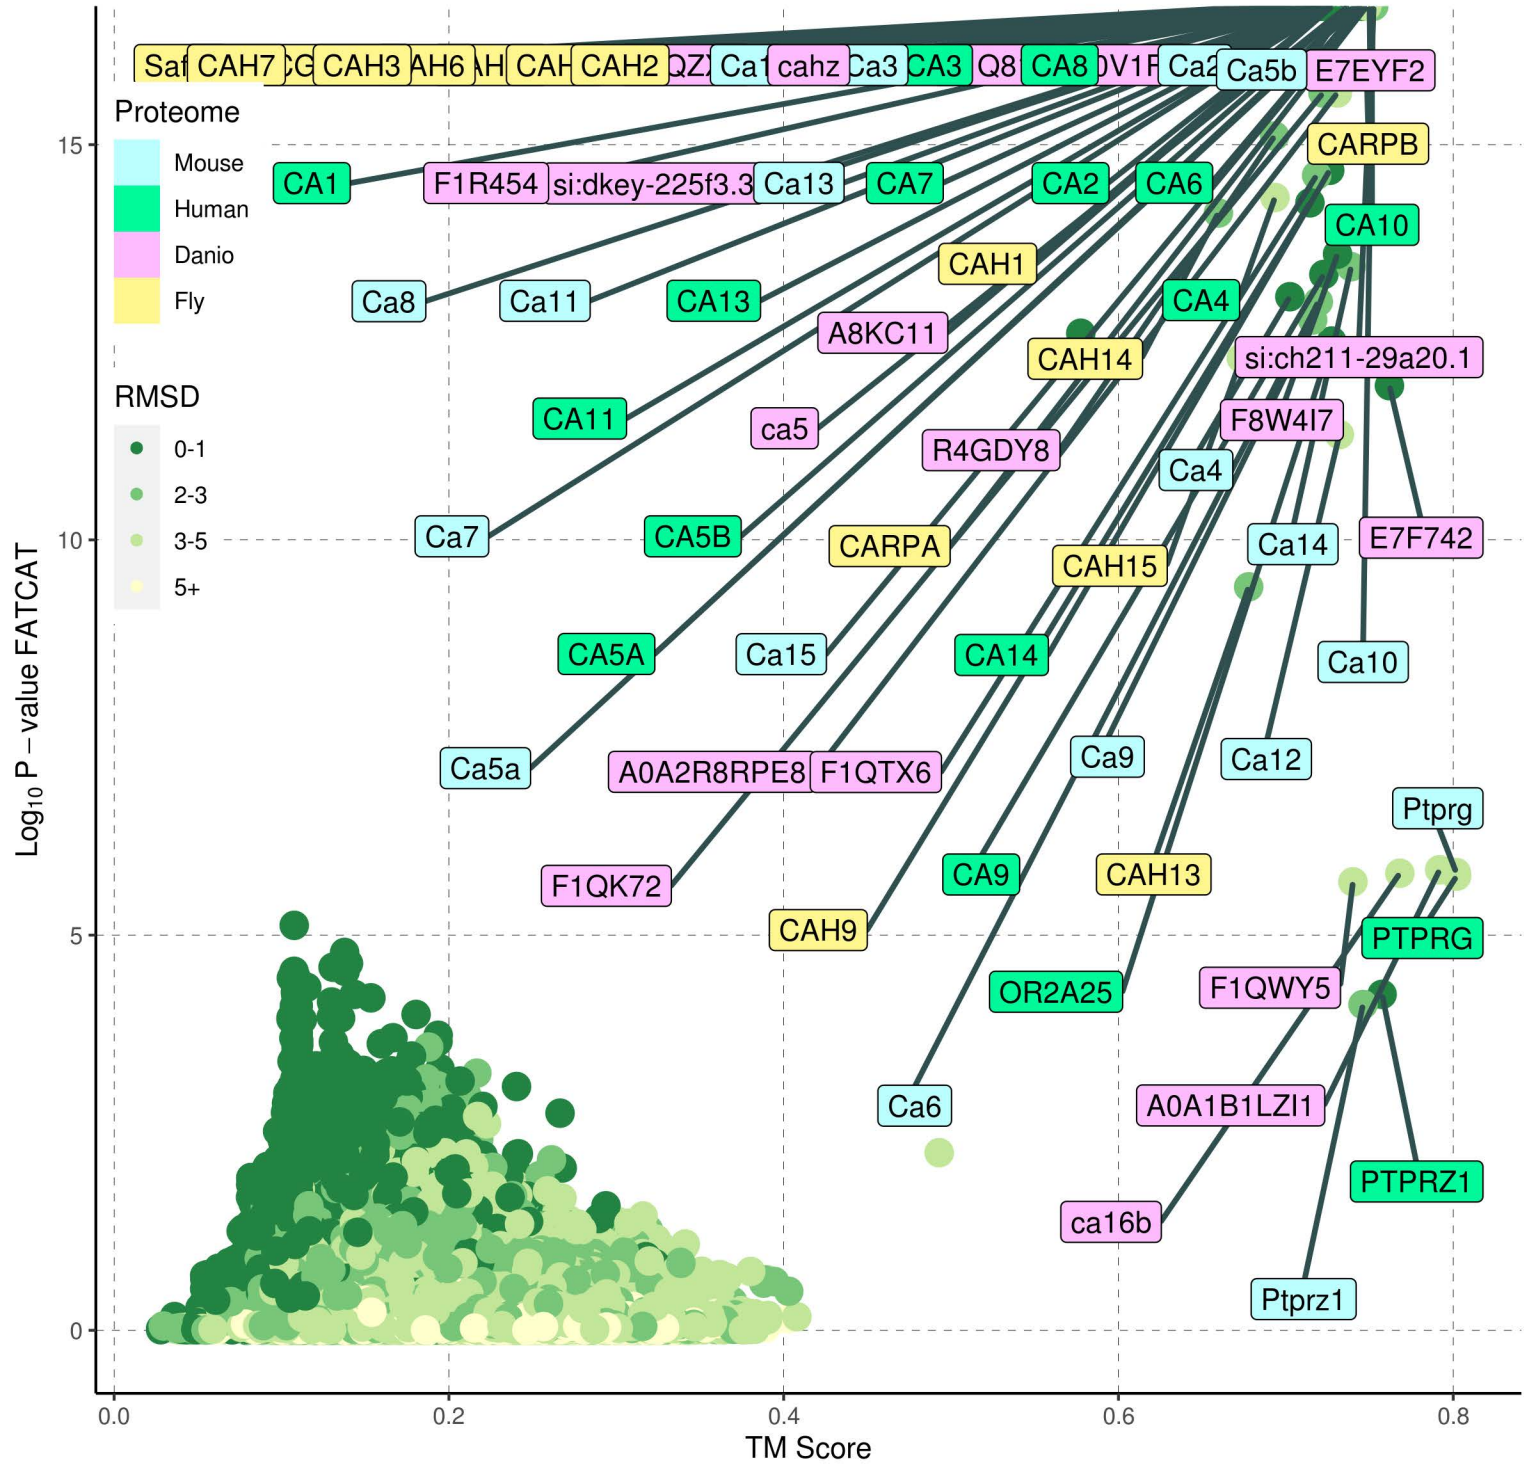

D9 : No hits, top-scoring values are indicated

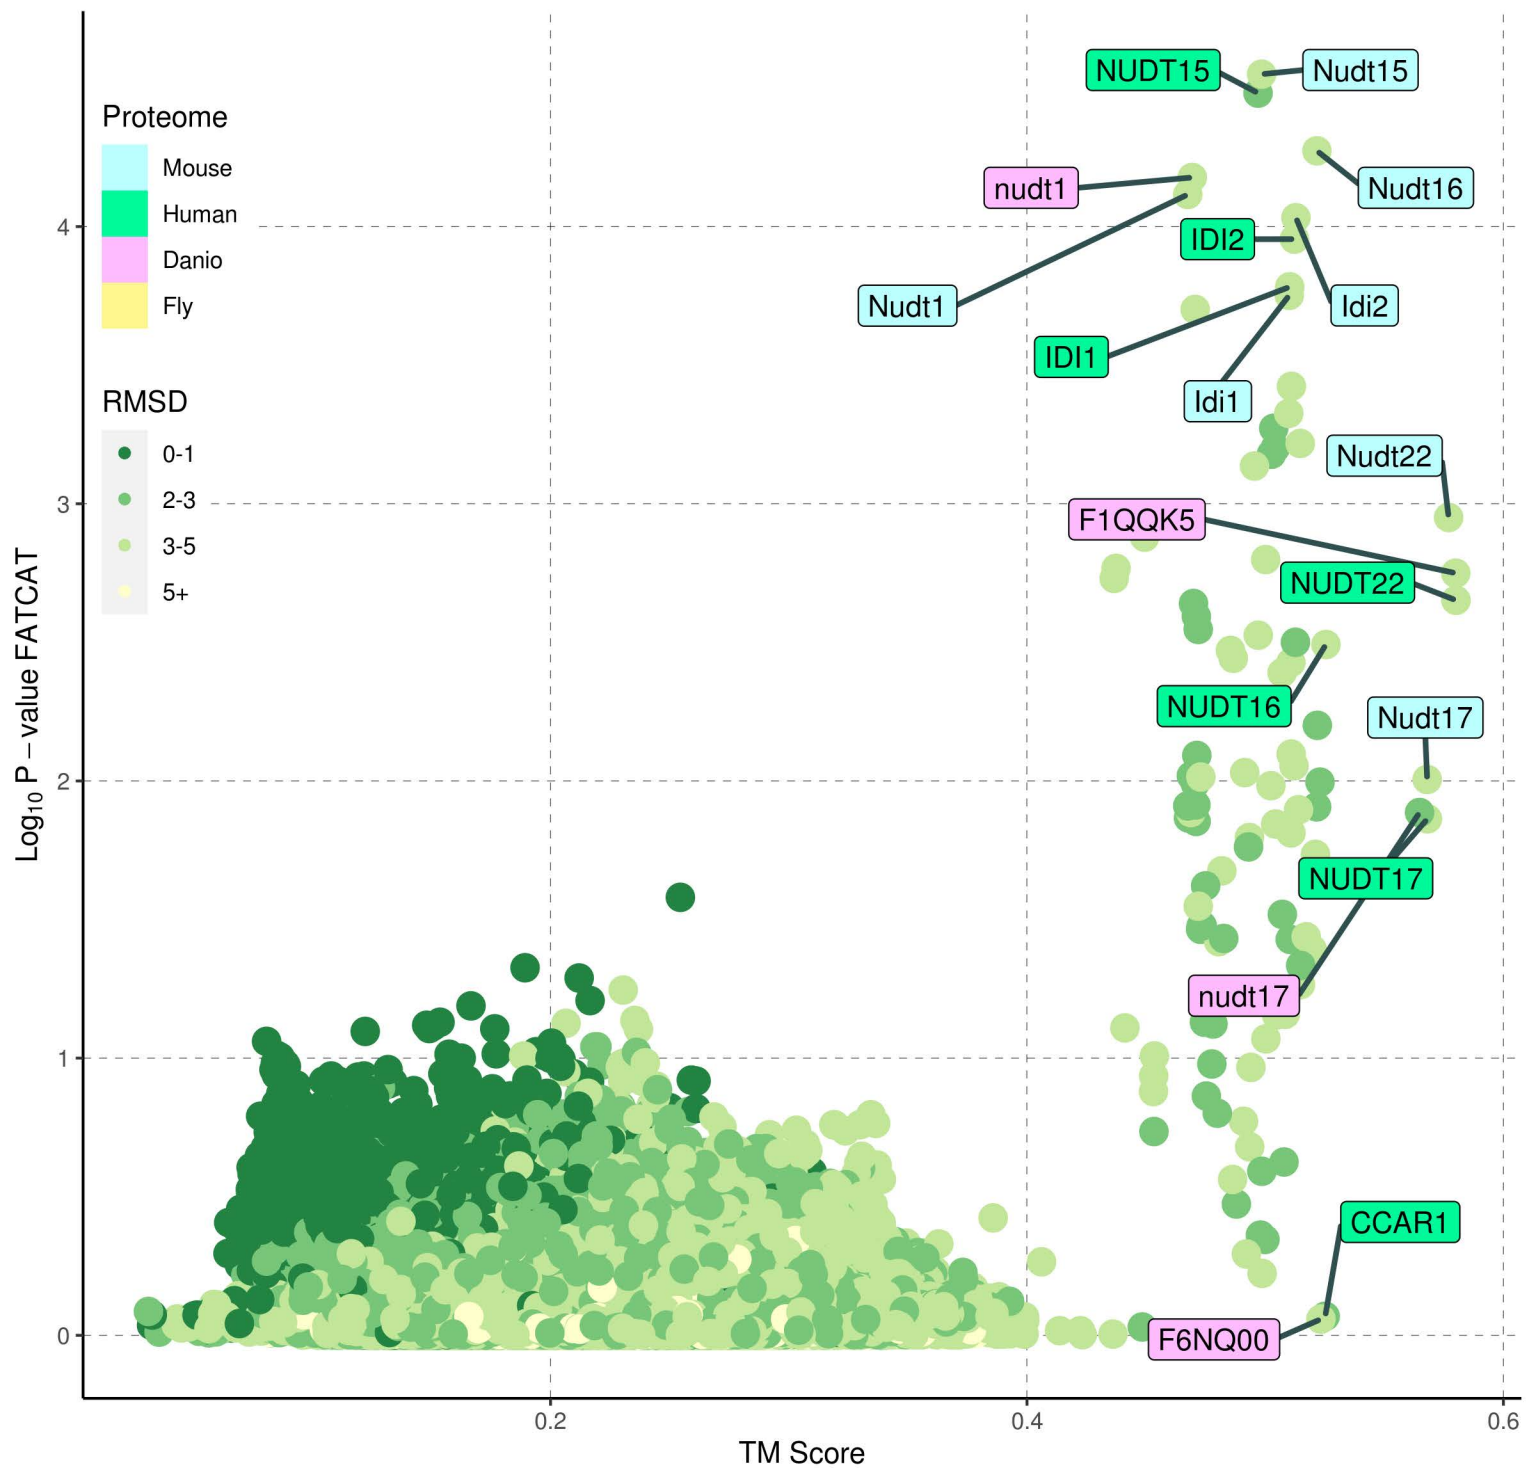

# D10 : No hits, top-scoring values are indicated

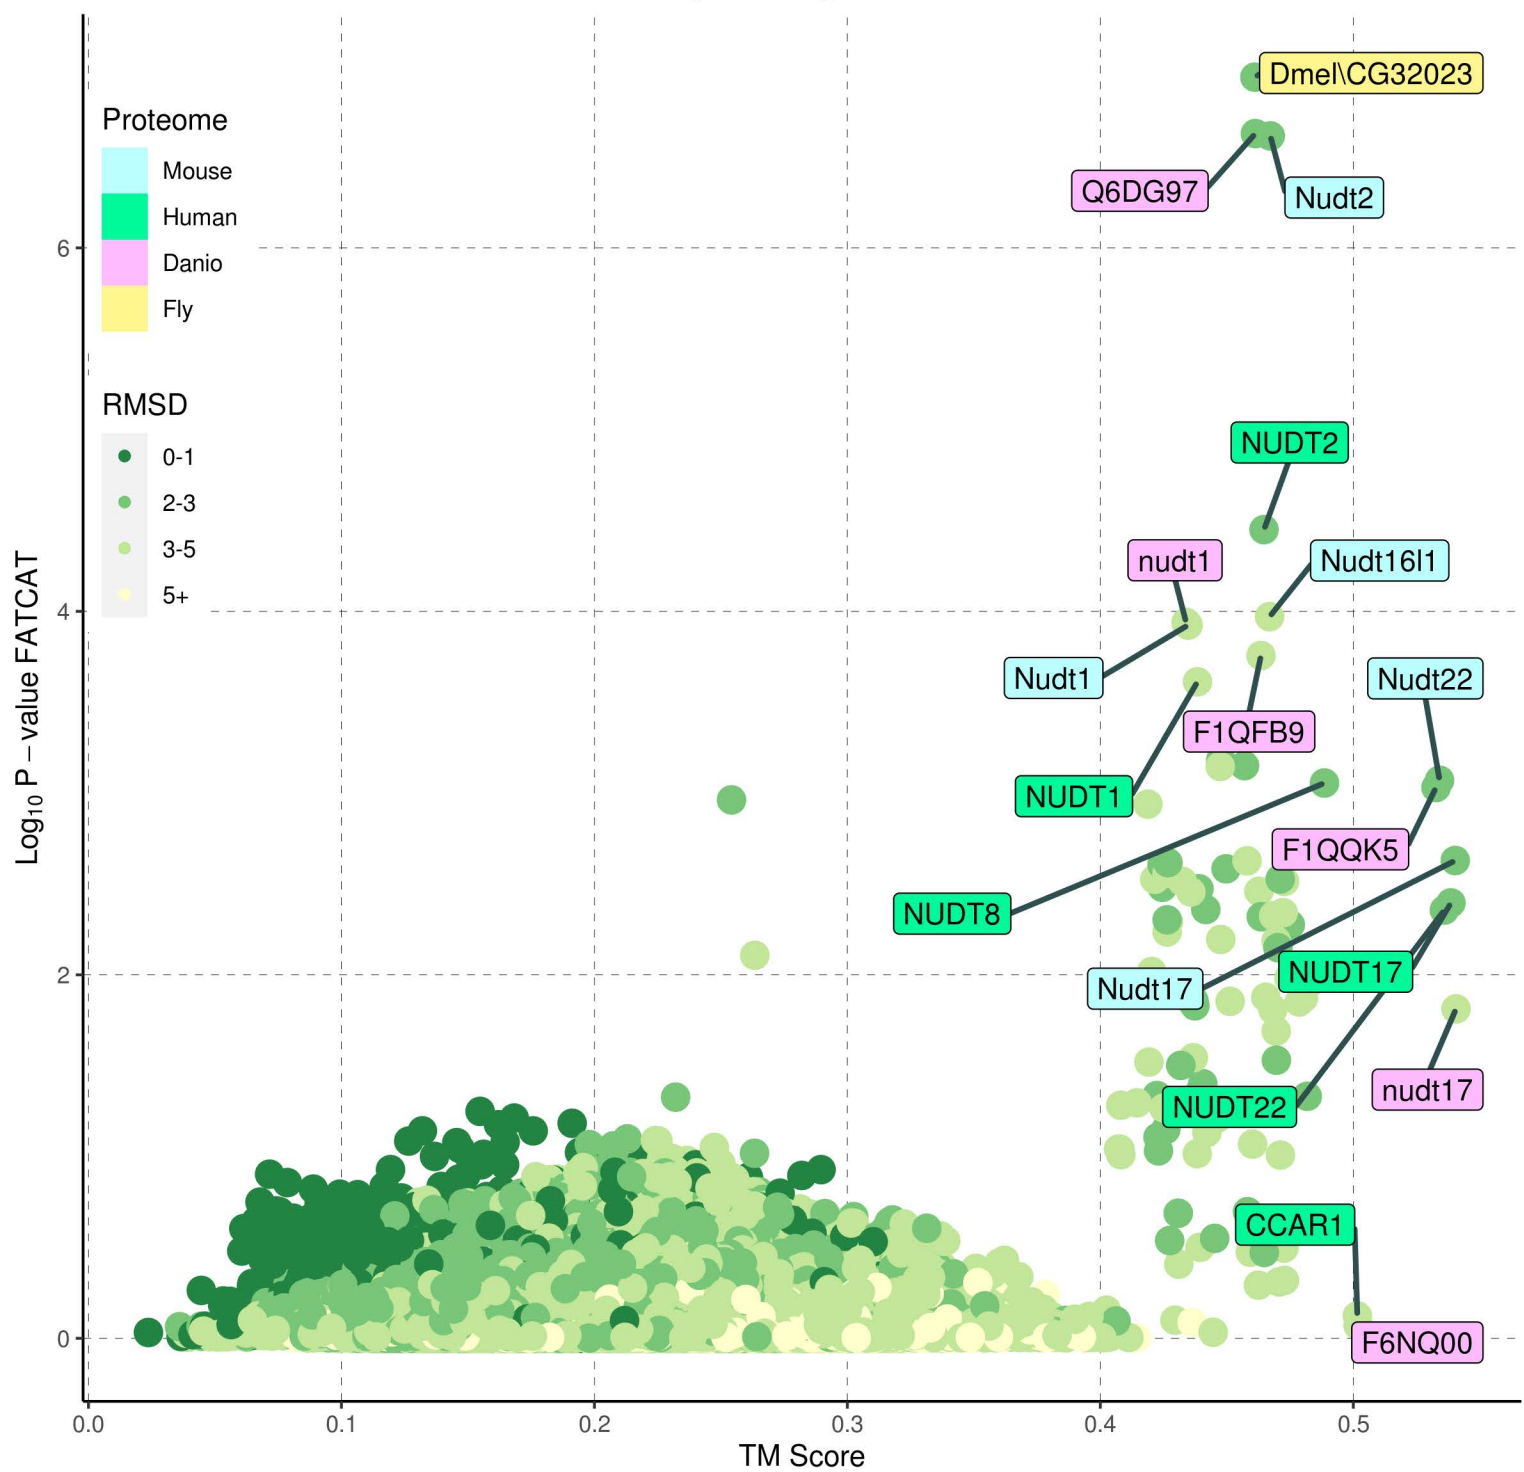

## D11

Log<sub>10</sub> P -value FATCAT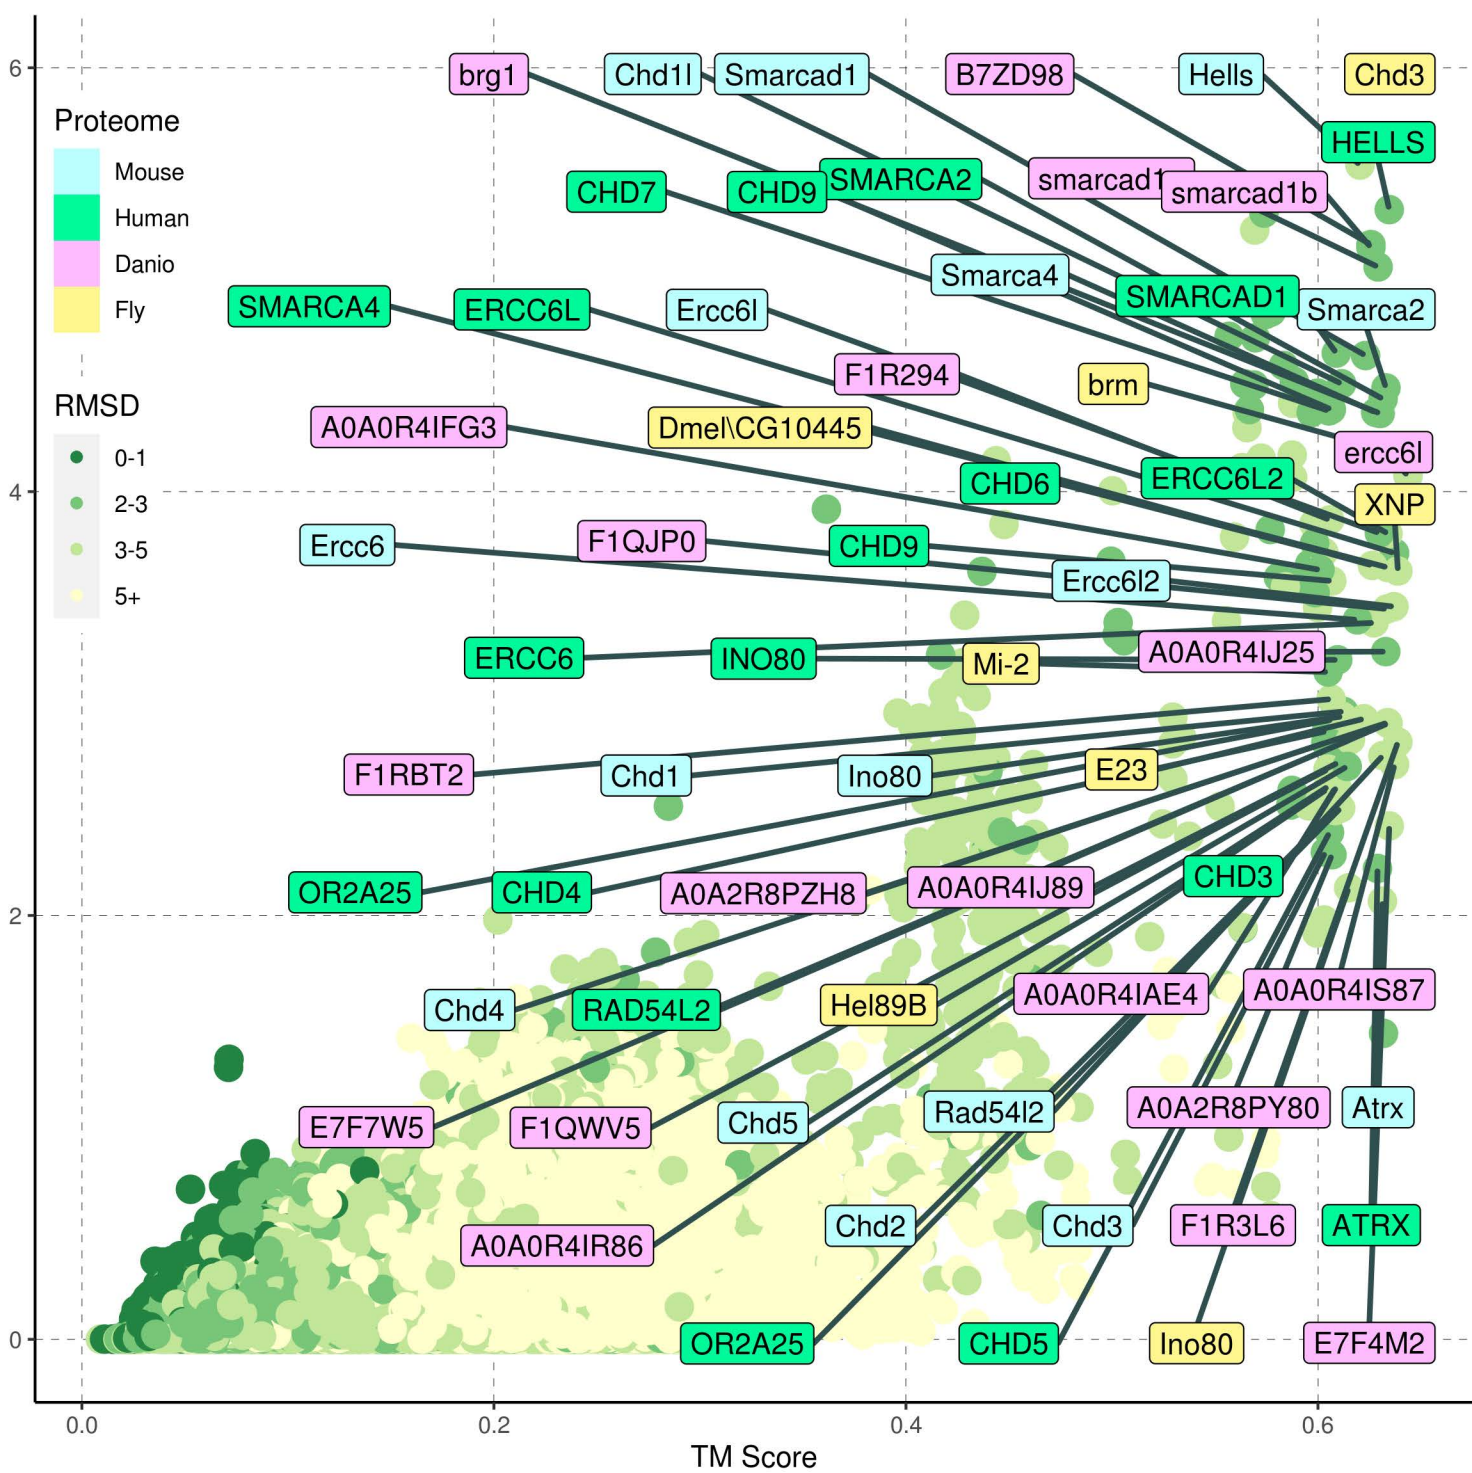



D12

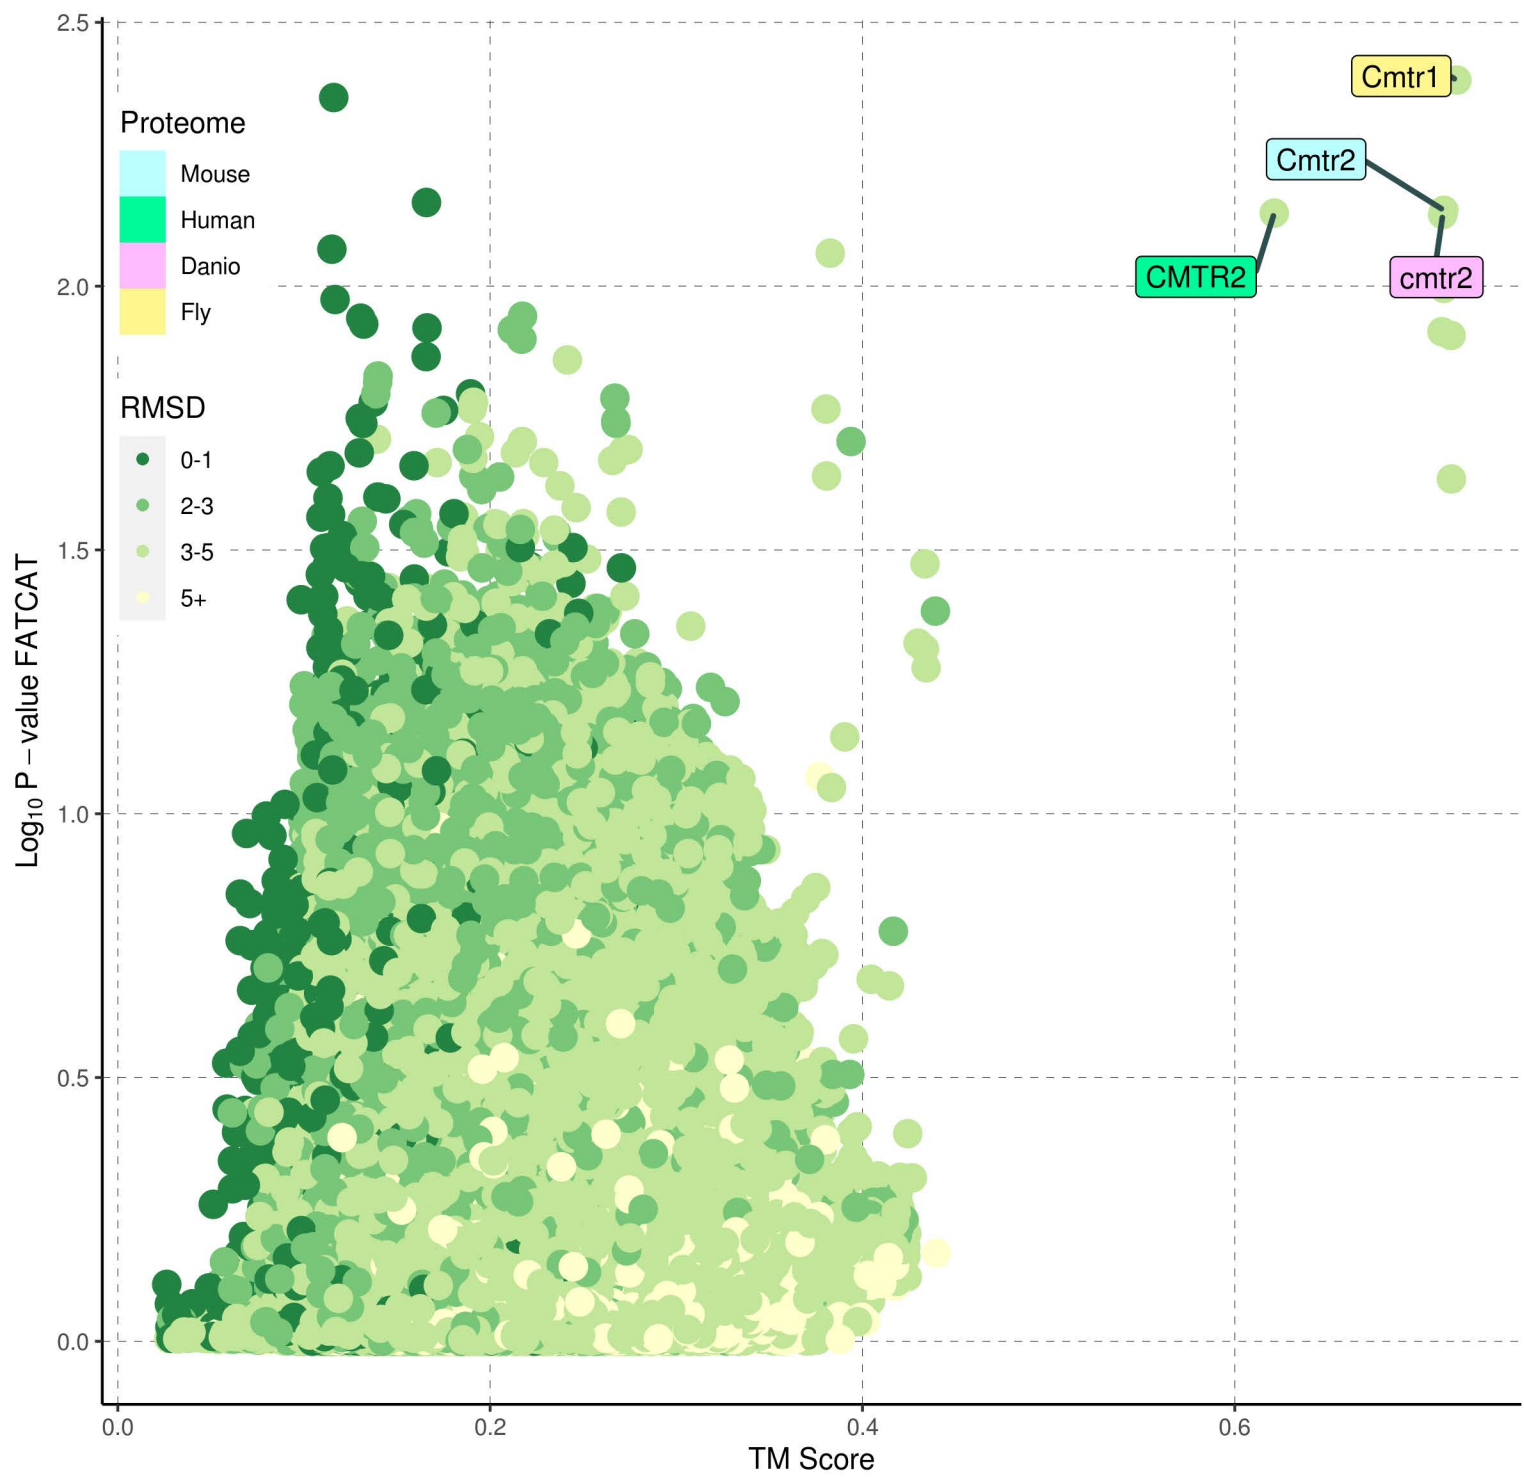

# D13 : No hits, top-scoring values are indicated

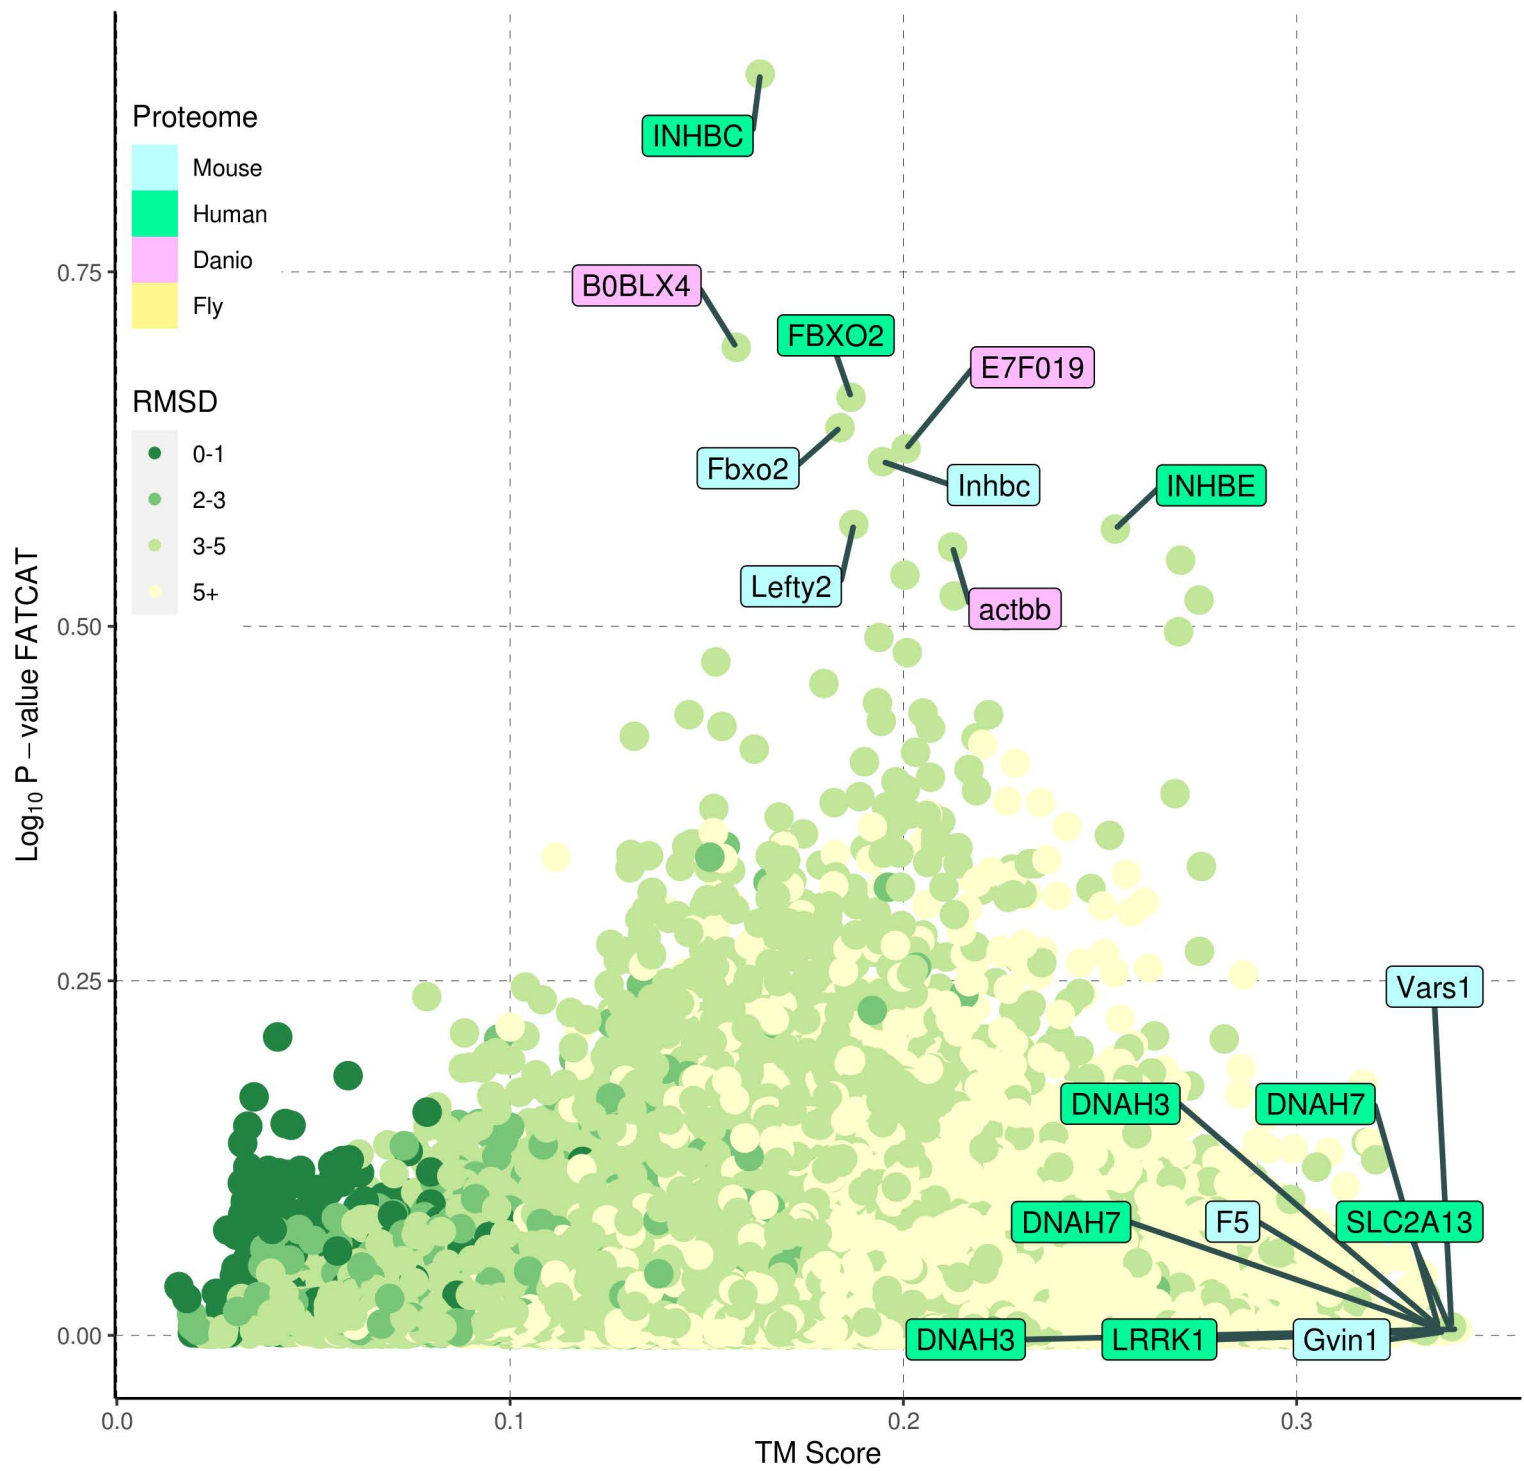



DorfB : No hits, top-scoring values are indicated

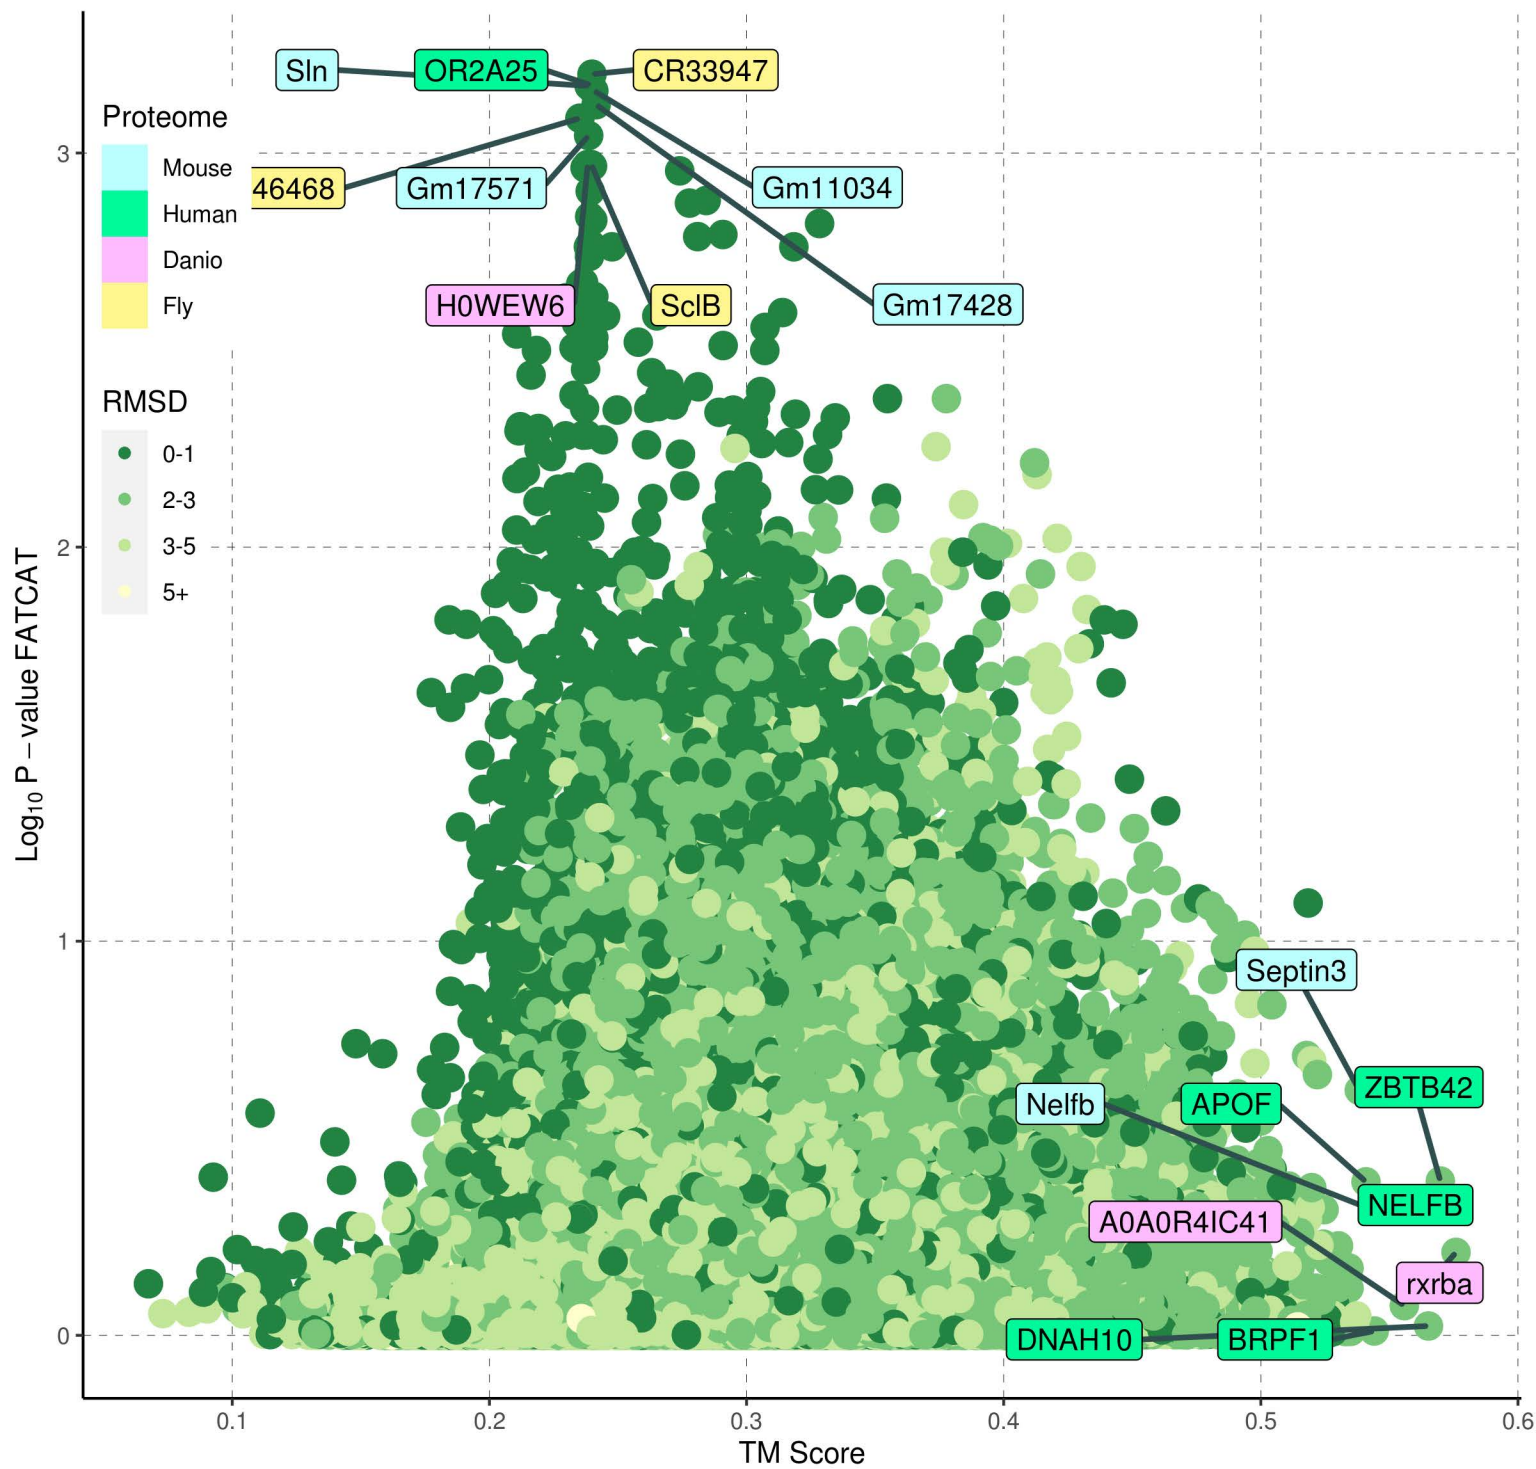

DorfC : No hits, top-scoring values are indicated

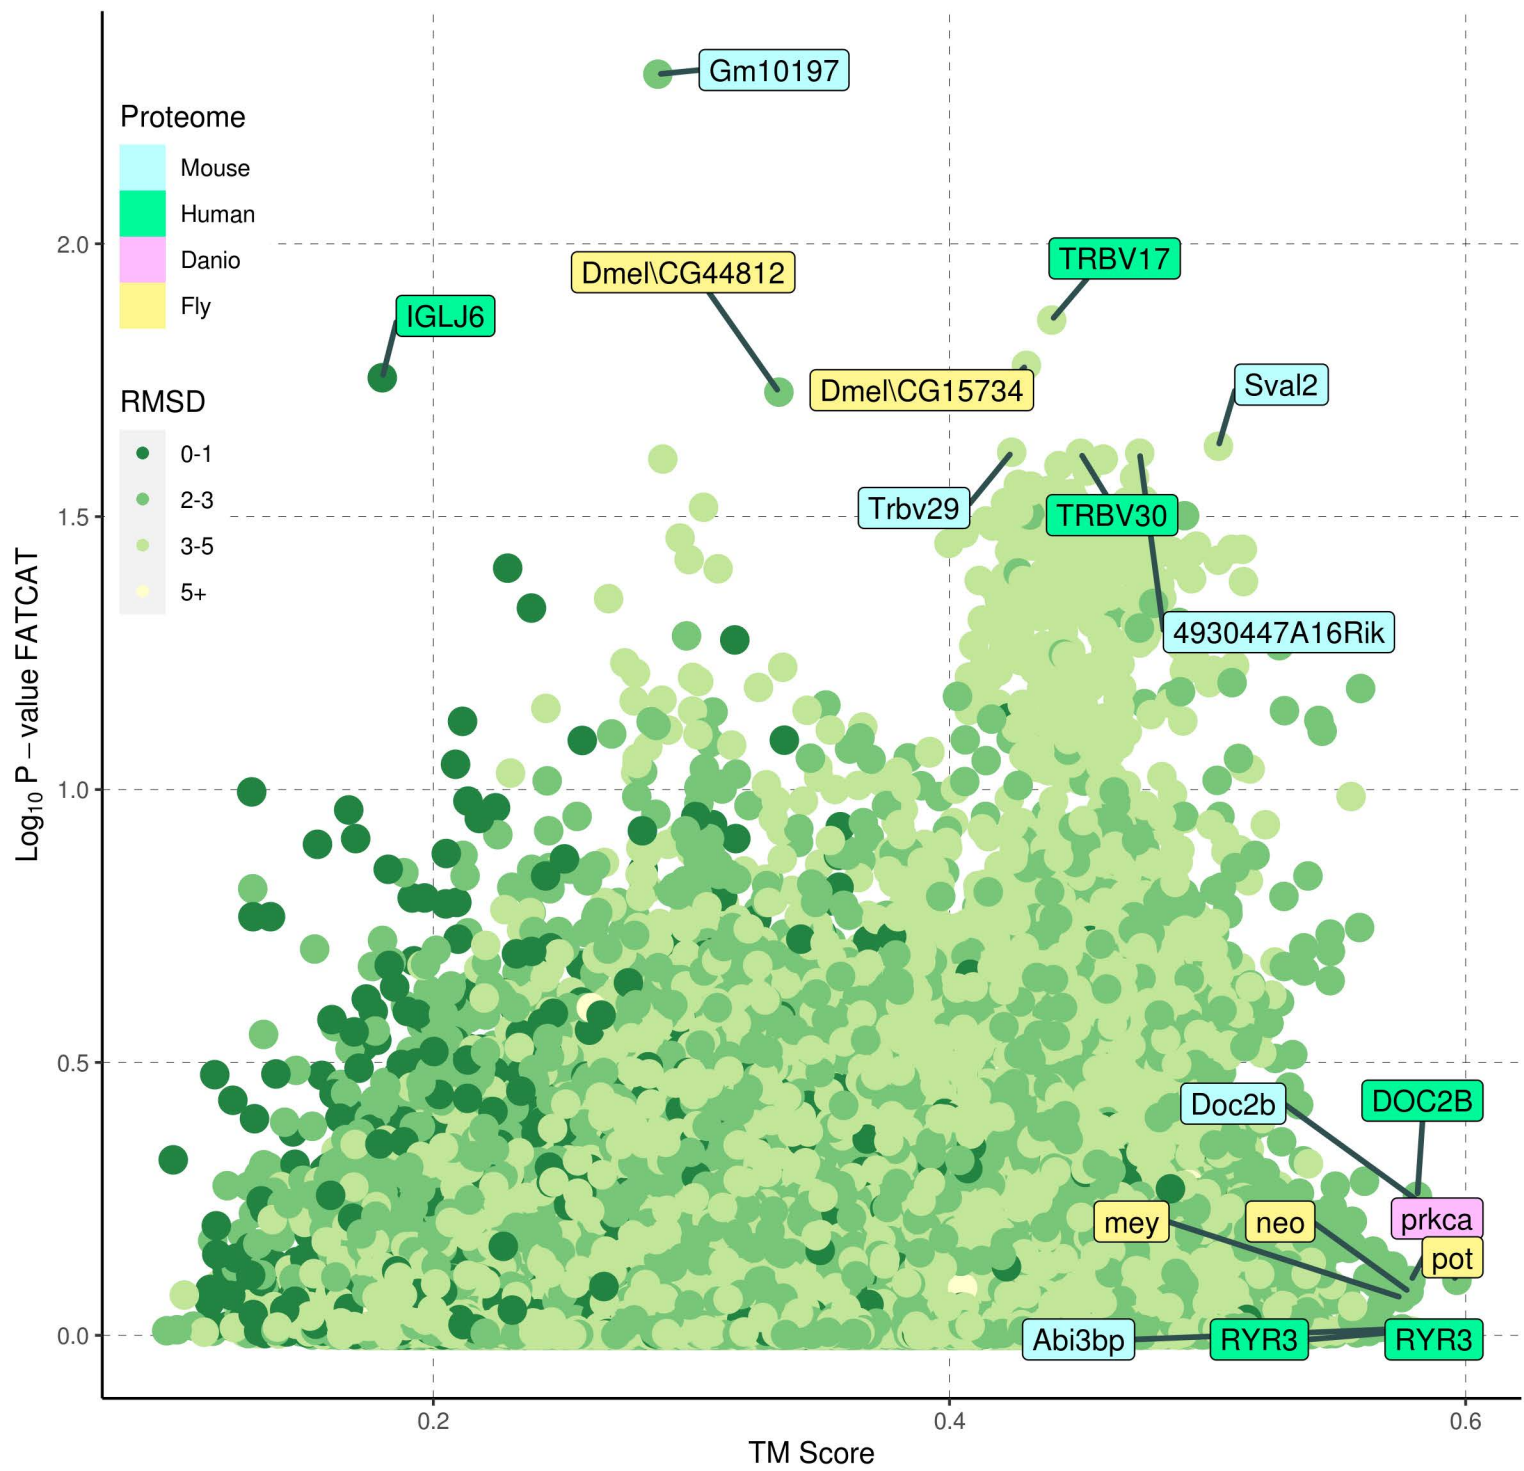

DorfD : No hits, top-scoring values are indicated

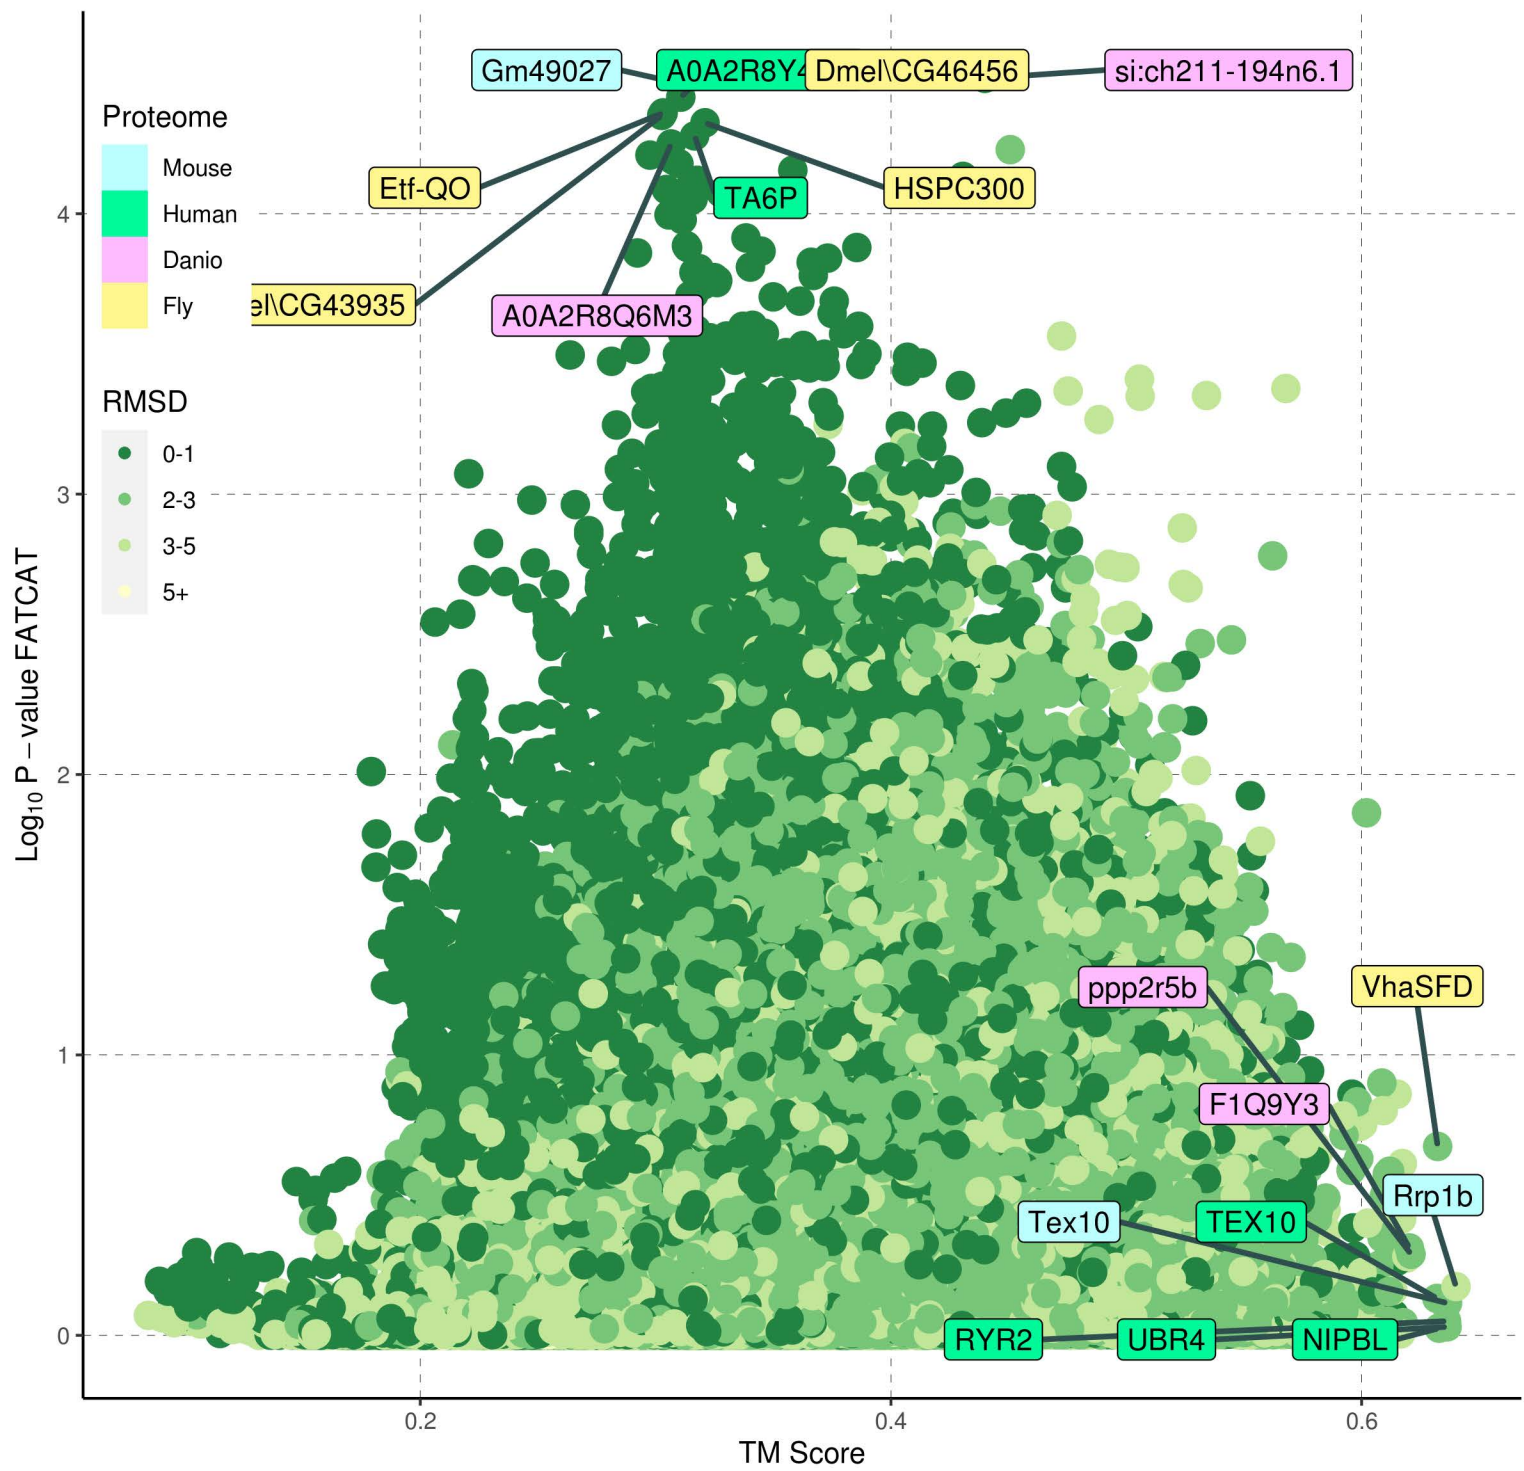

DorfE : No hits, top-scoring values are indicated

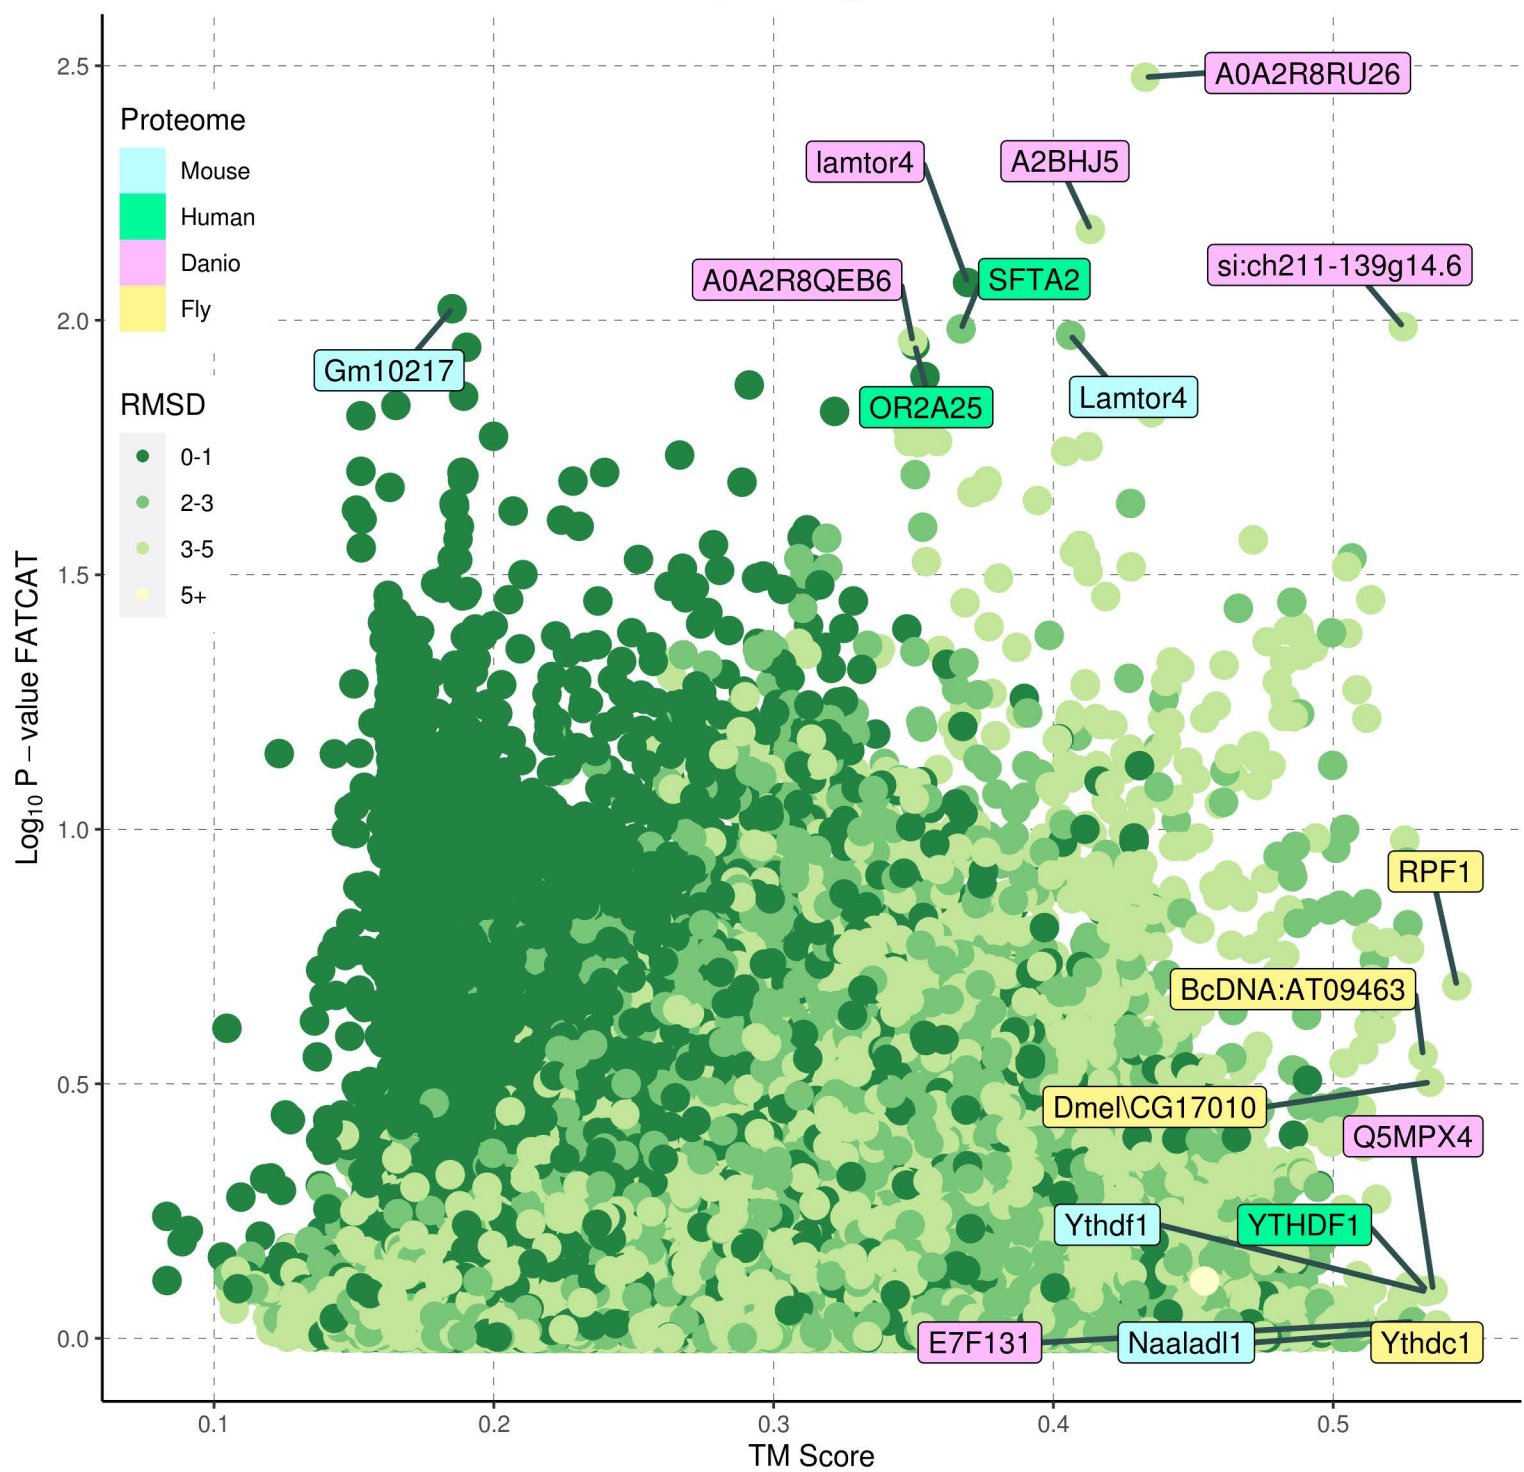

# DorfF

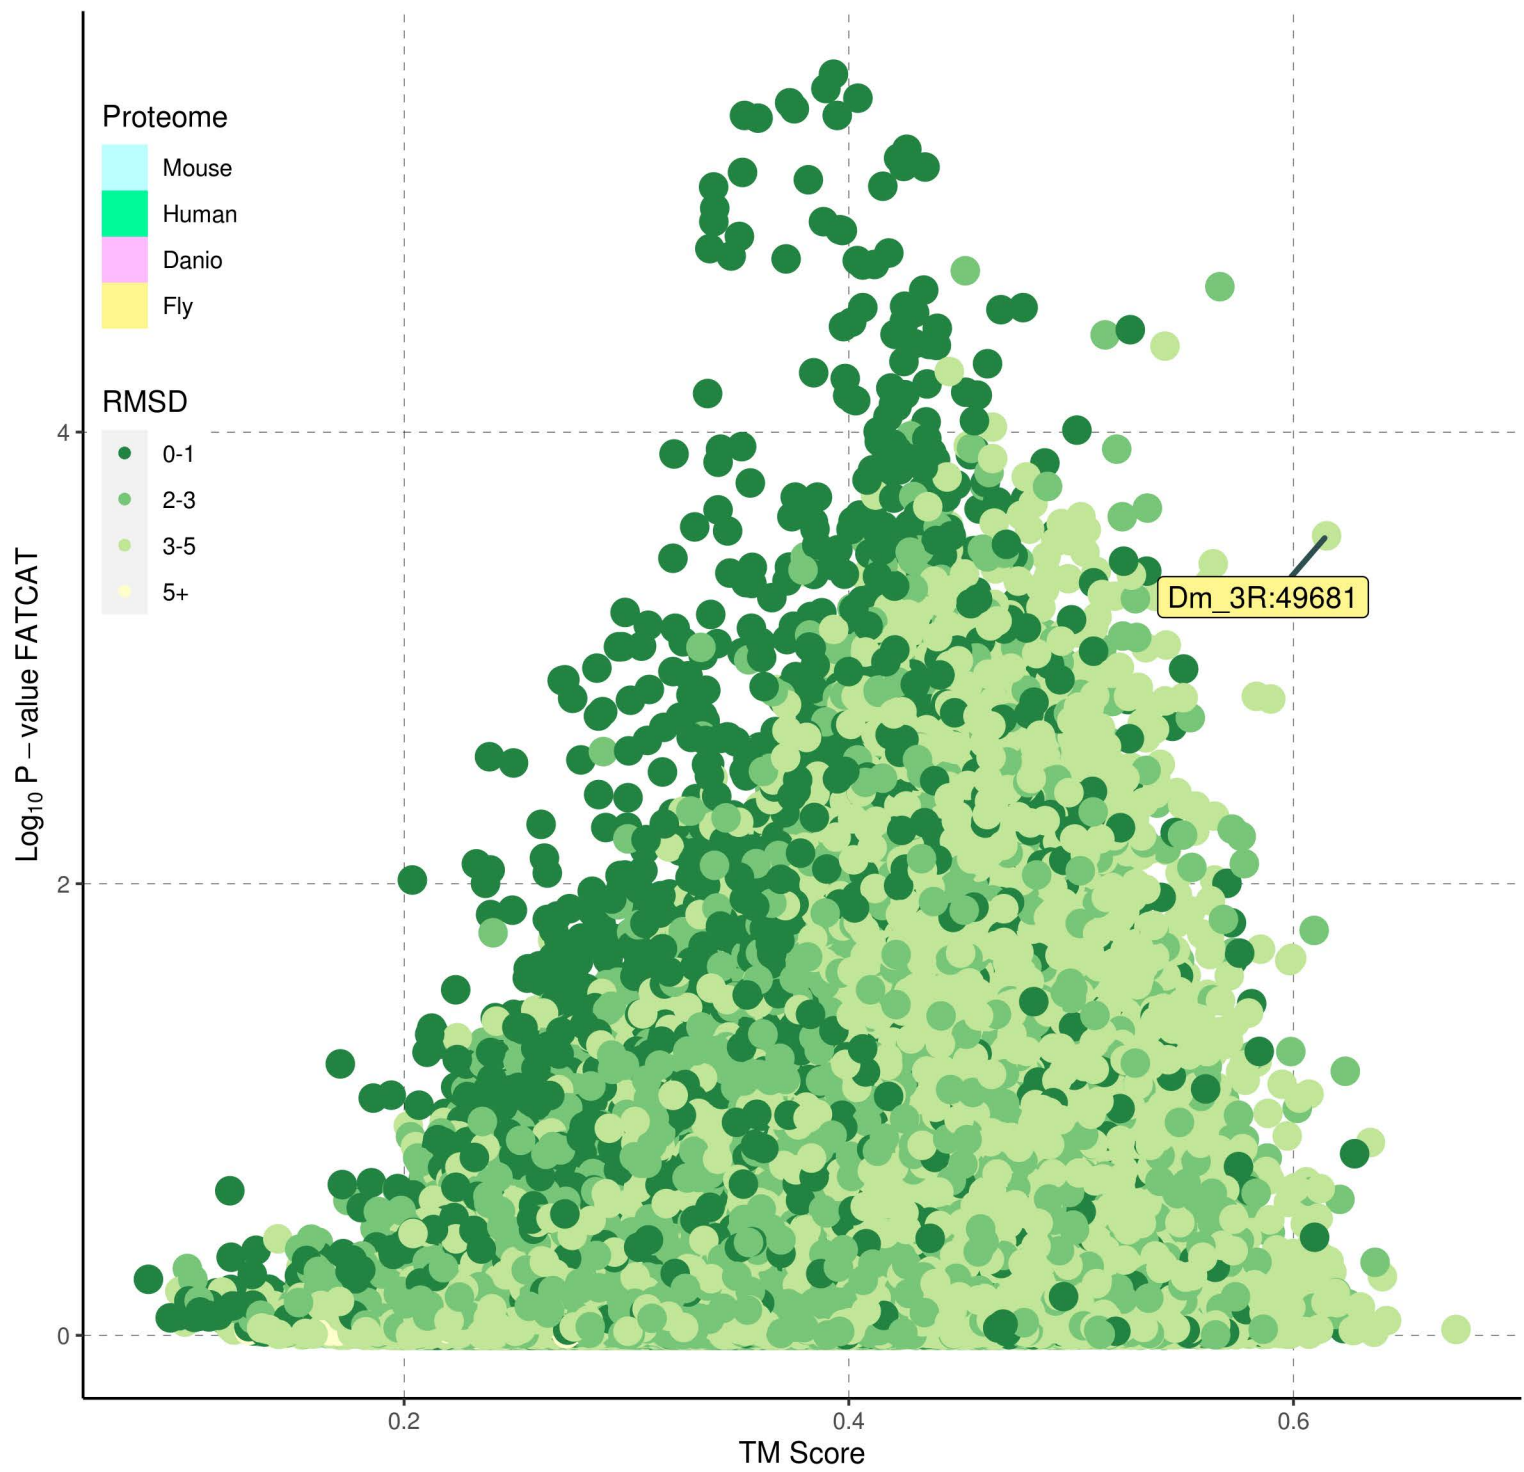



## DorfG

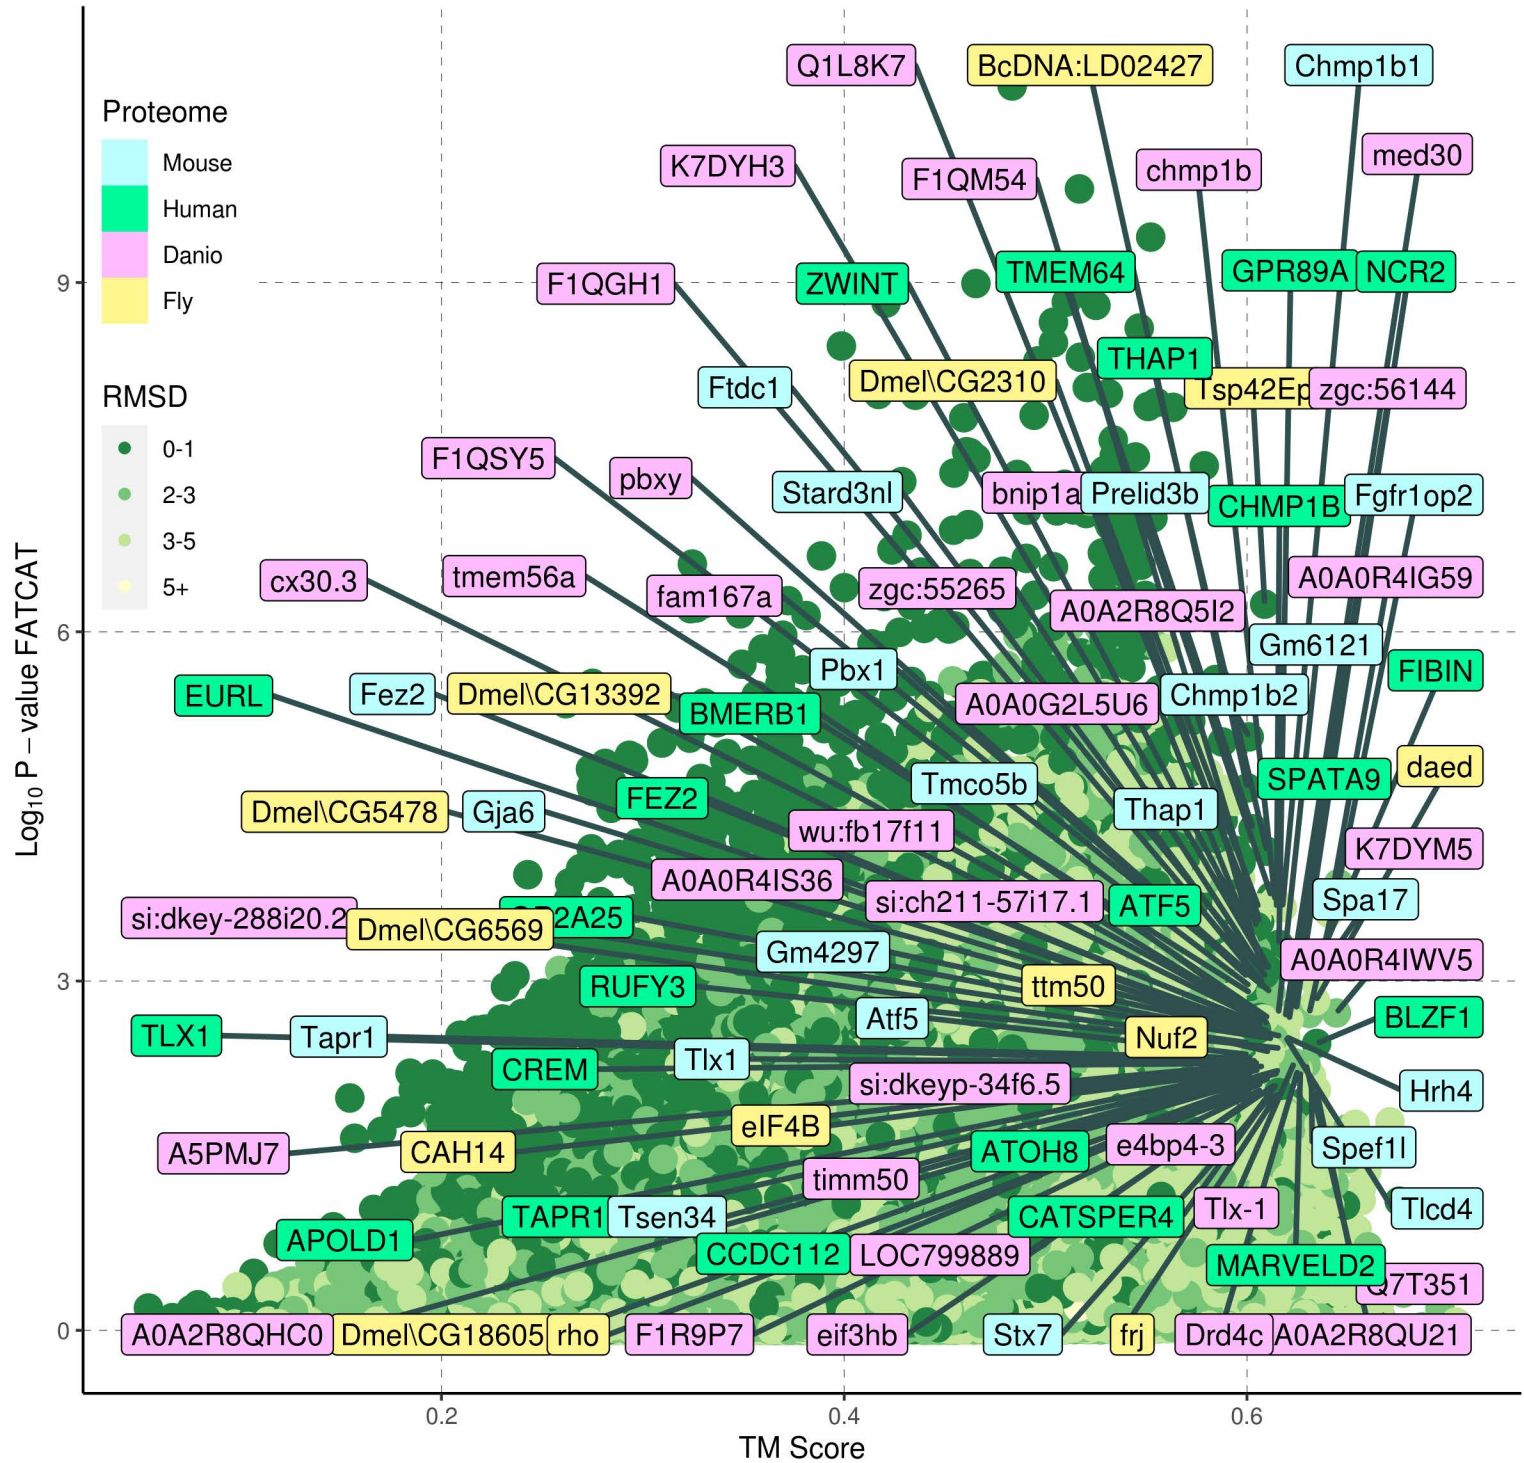

## DorfH

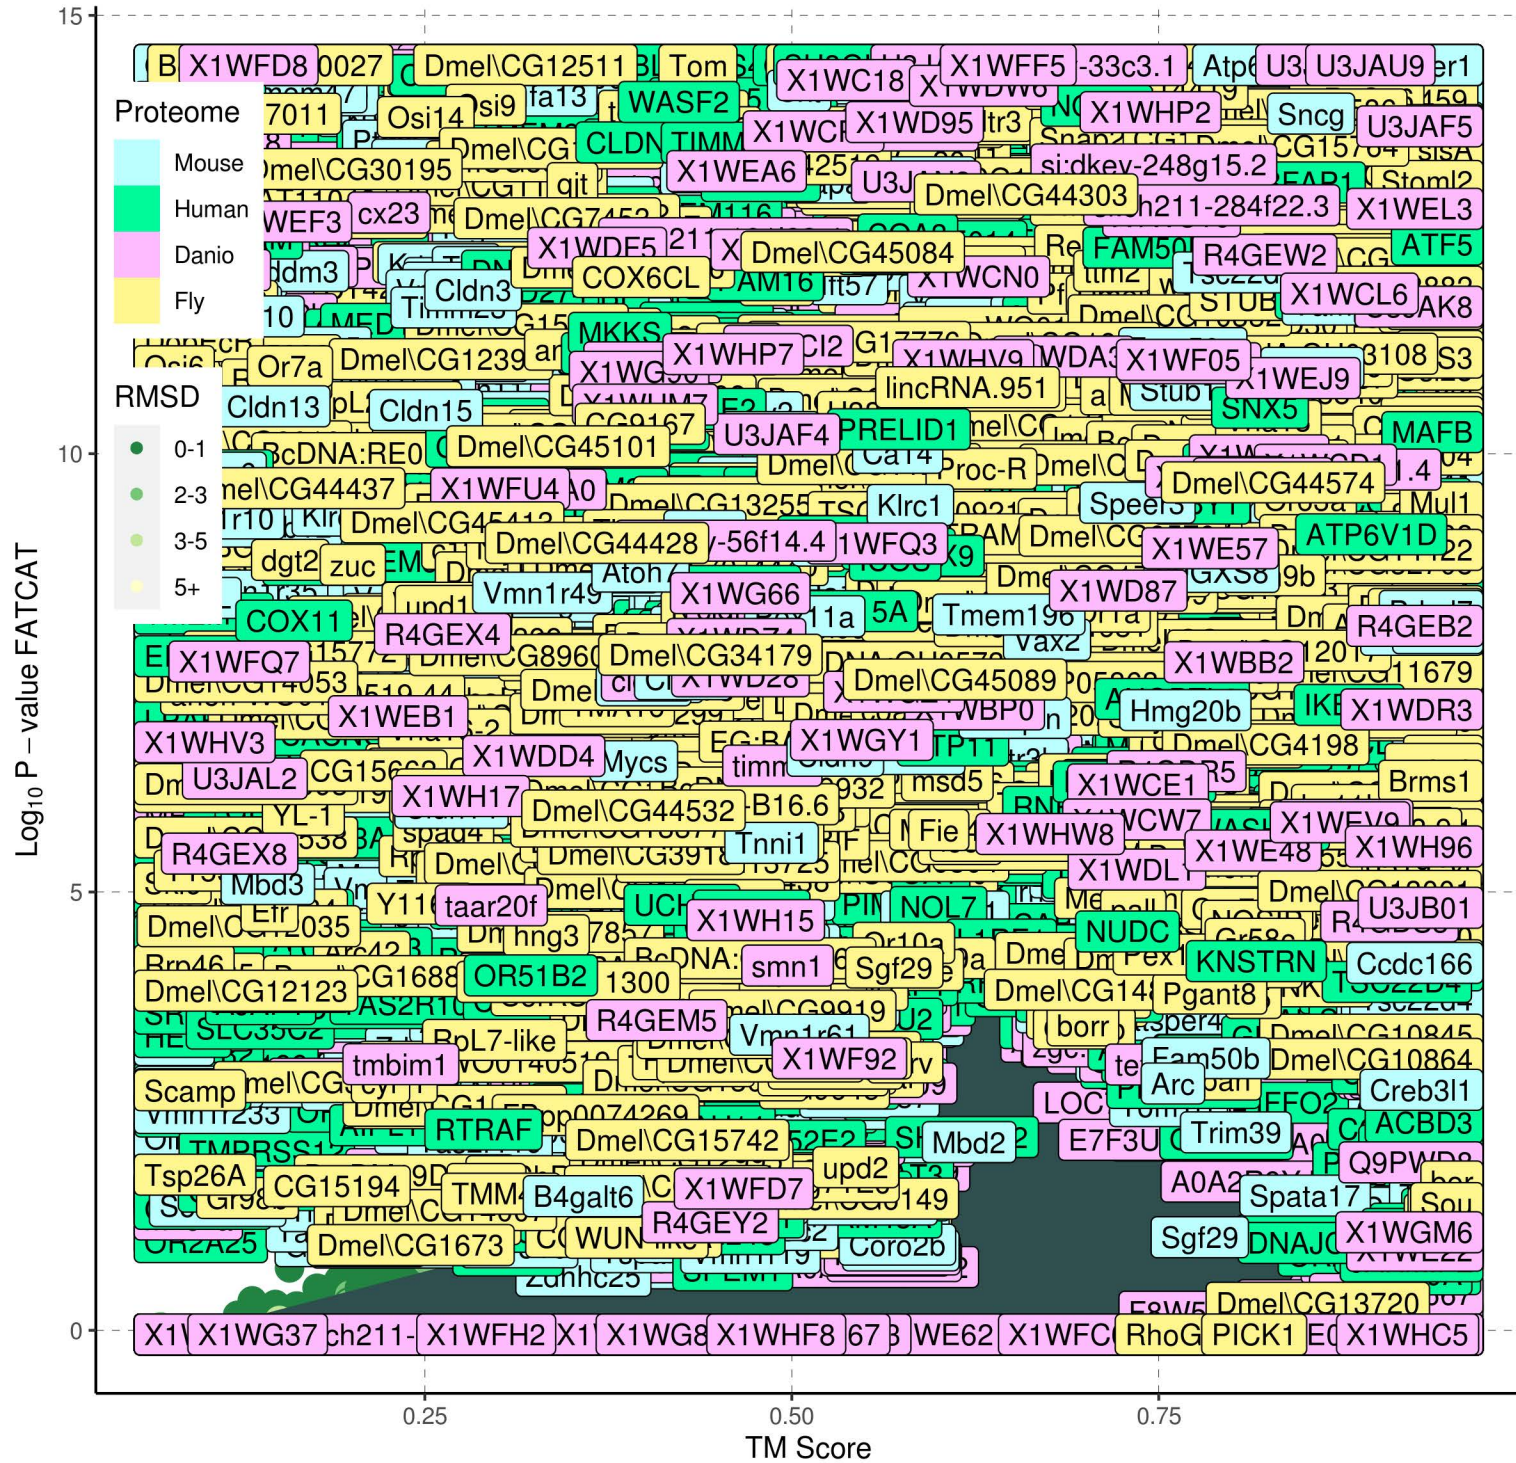

# Dorf1

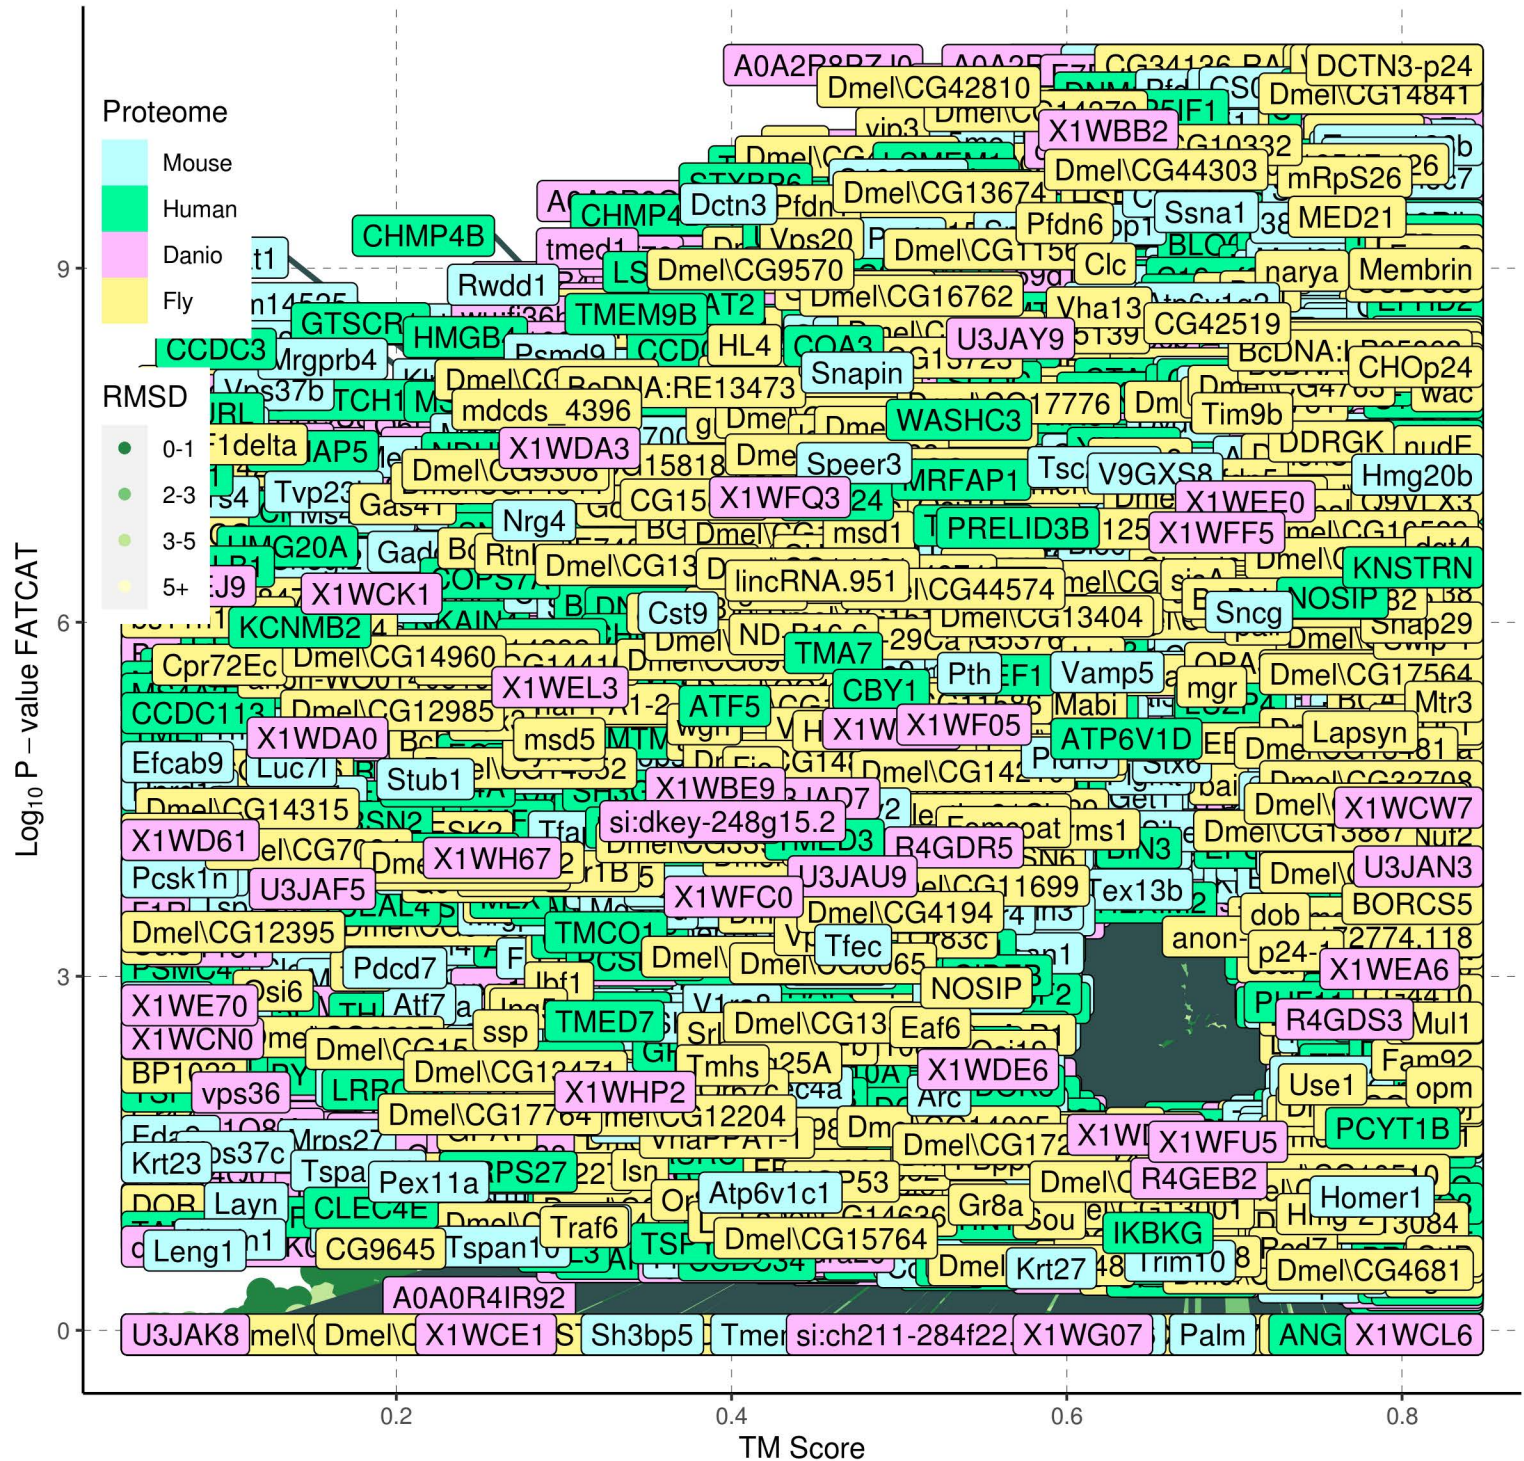

## E1 : No hits, top-scoring values are indicated

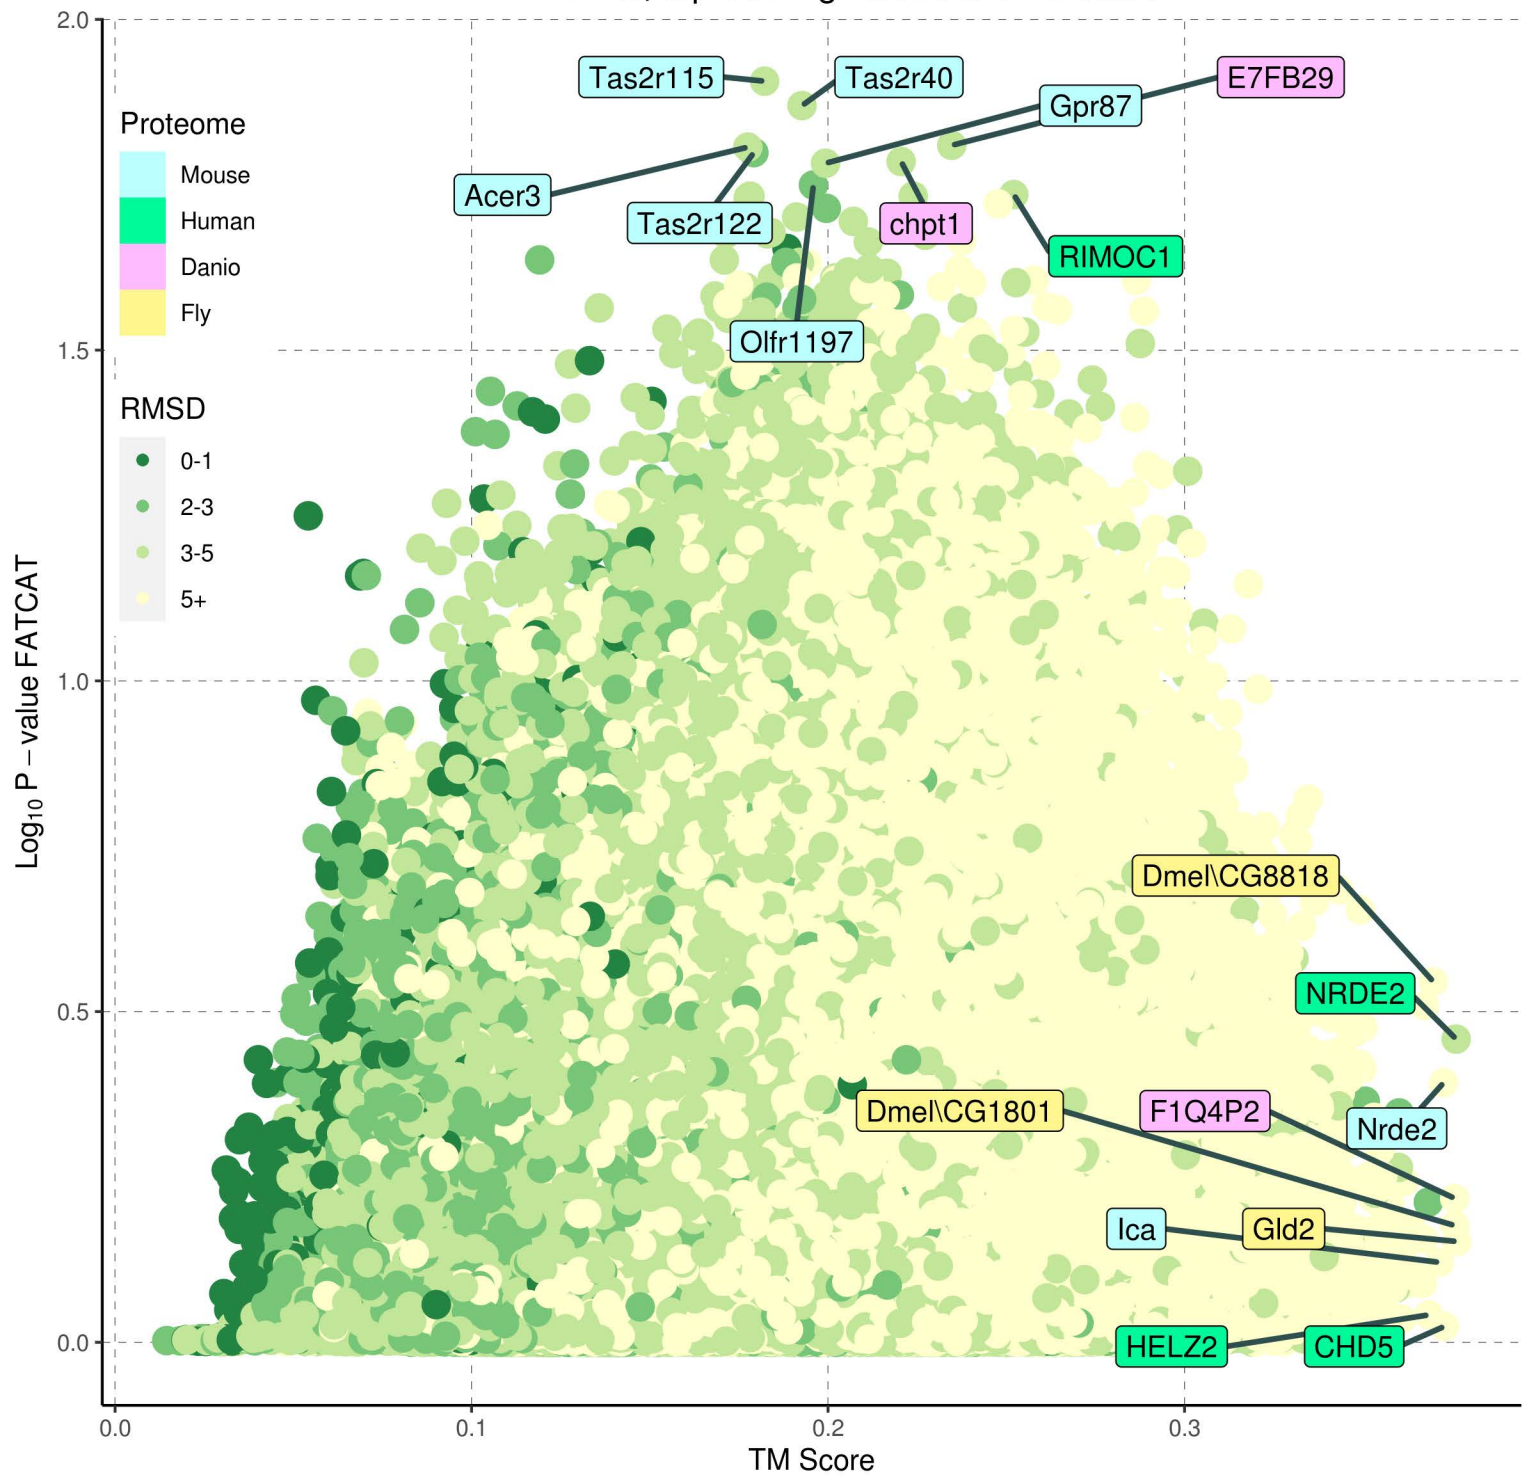

E2 : No hits, top-scoring values are indicated

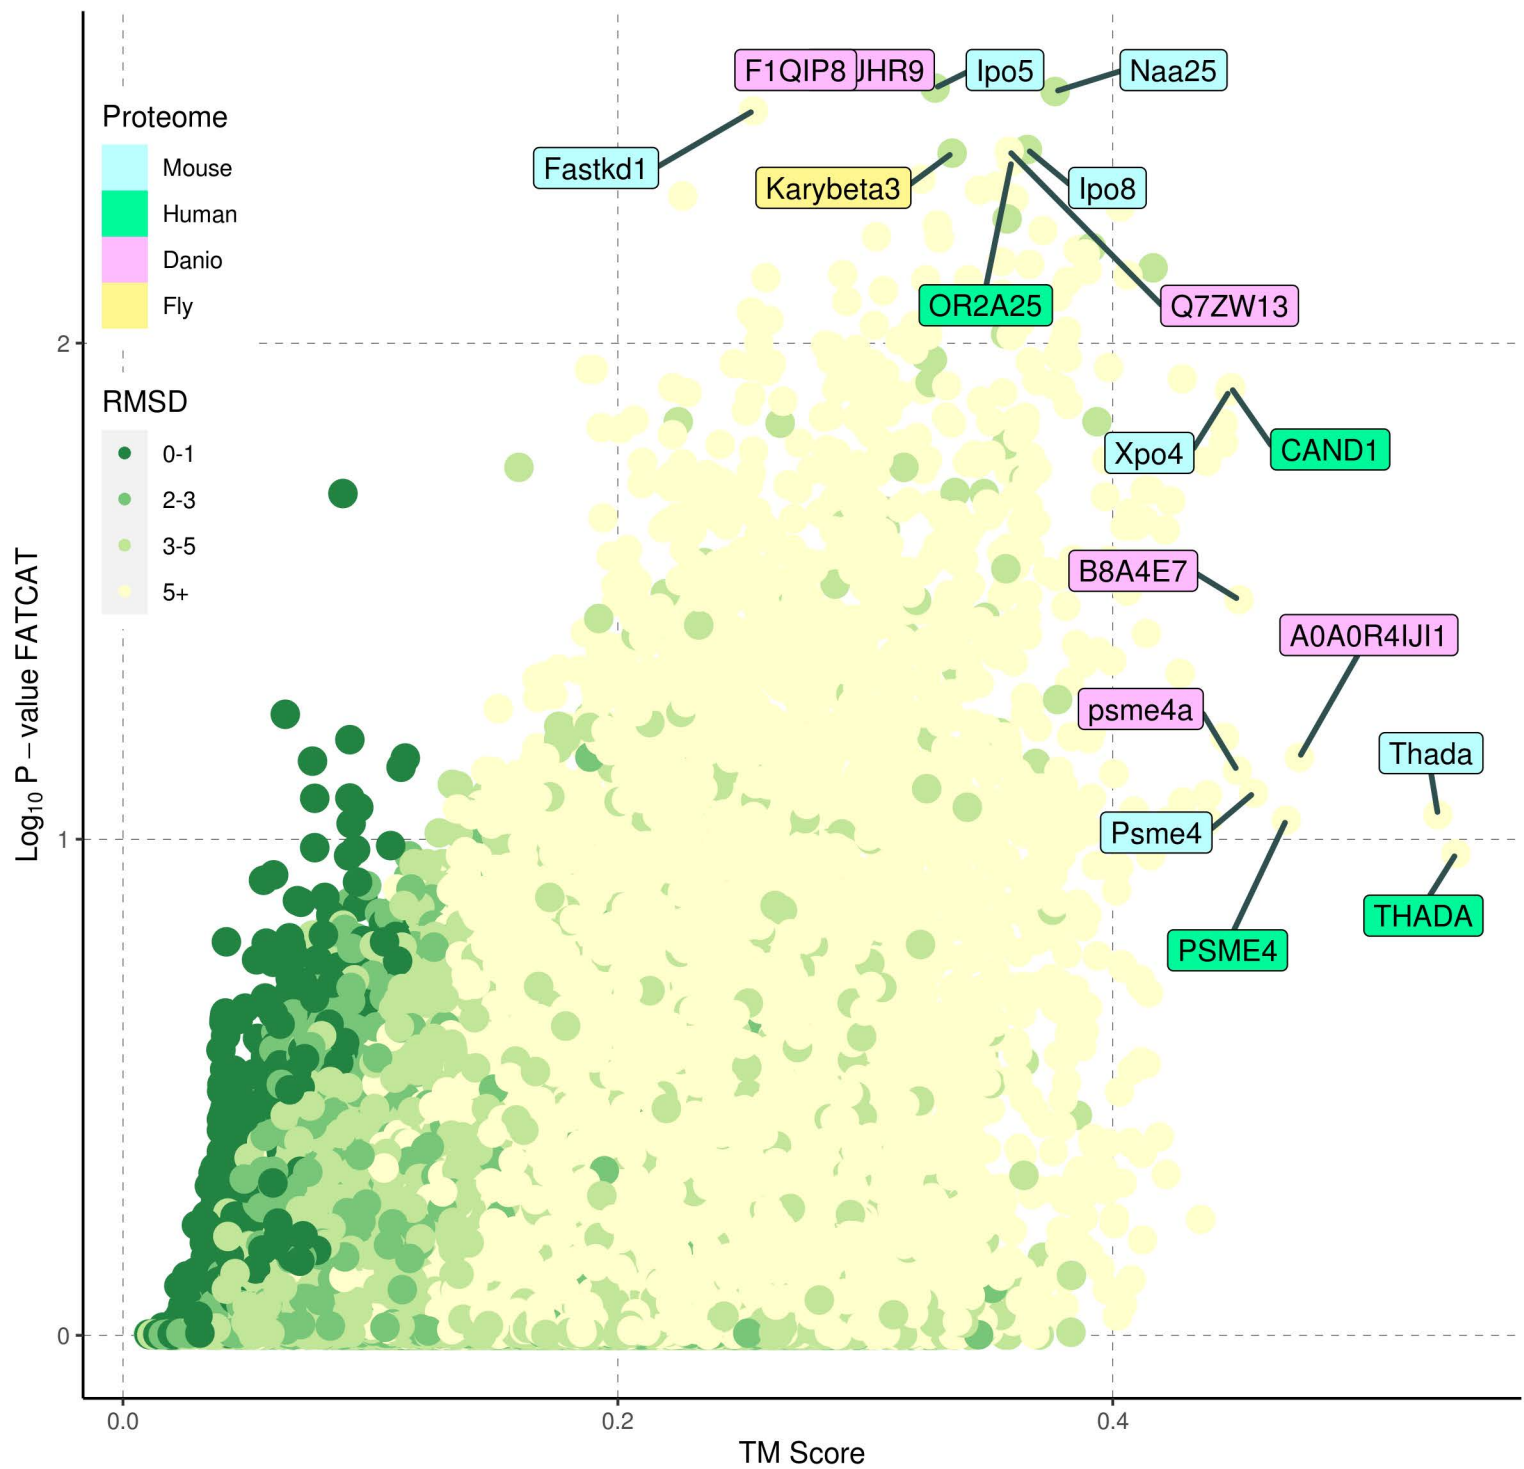

# E3 : No hits, top-scoring values are indicated

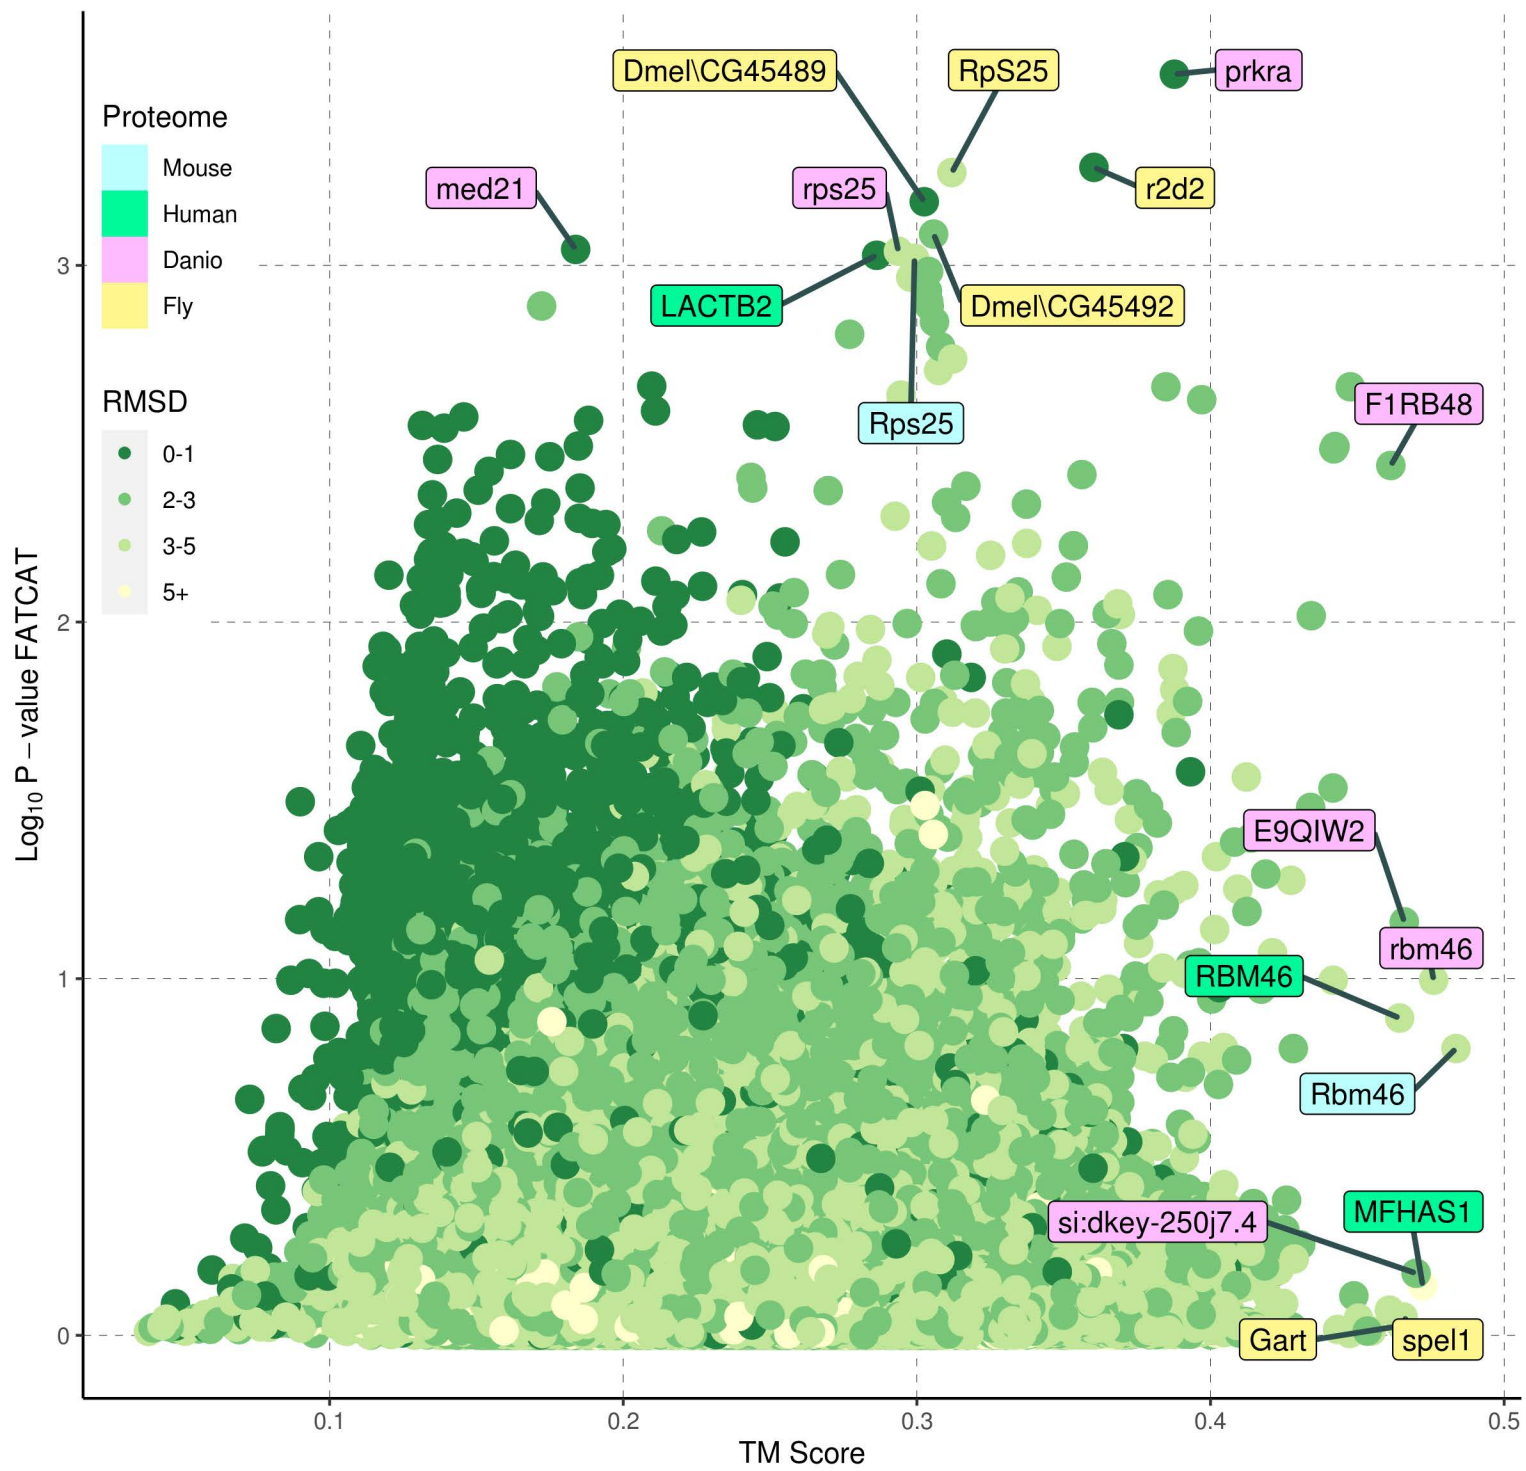

# E4 : No hits, top-scoring values are indicated

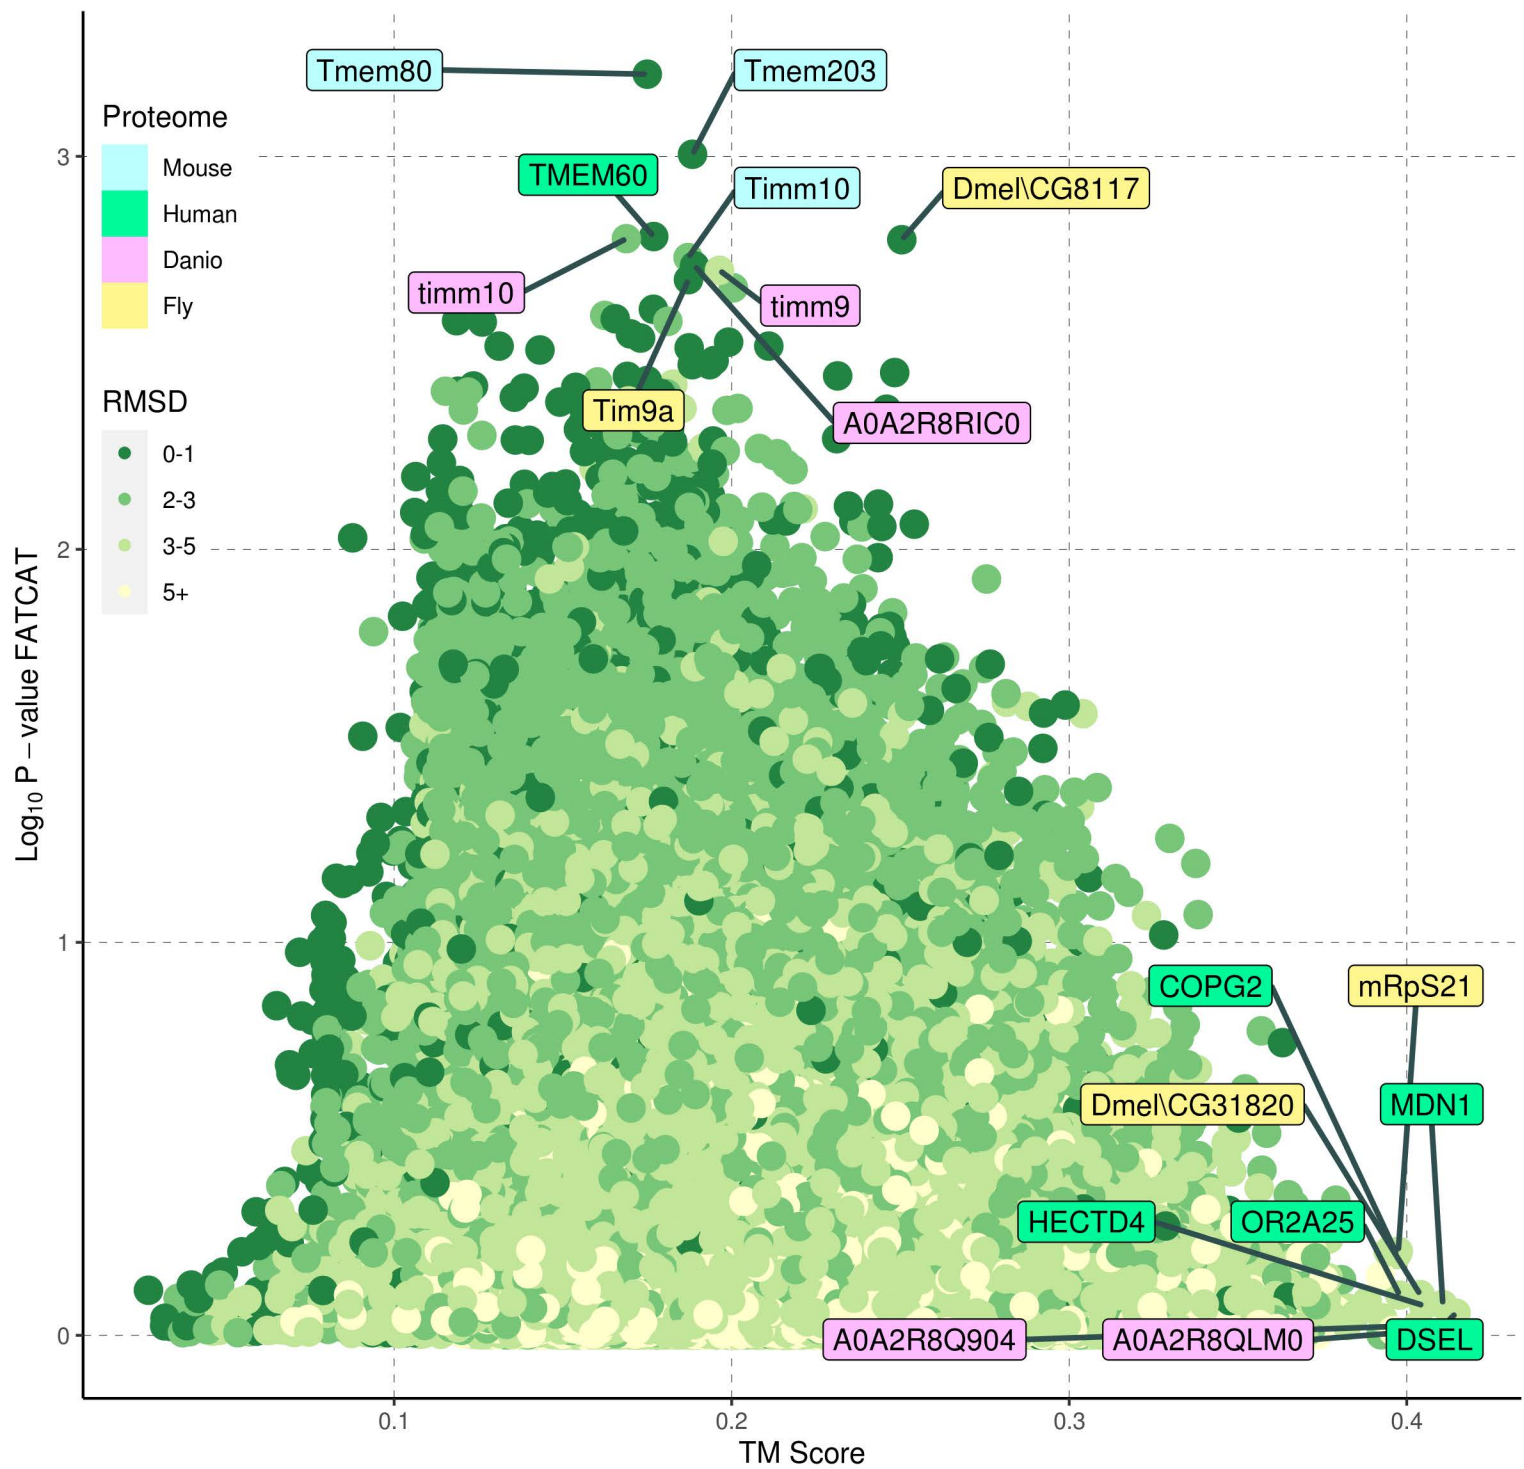

E5 : No hits, top-scoring values are indicated

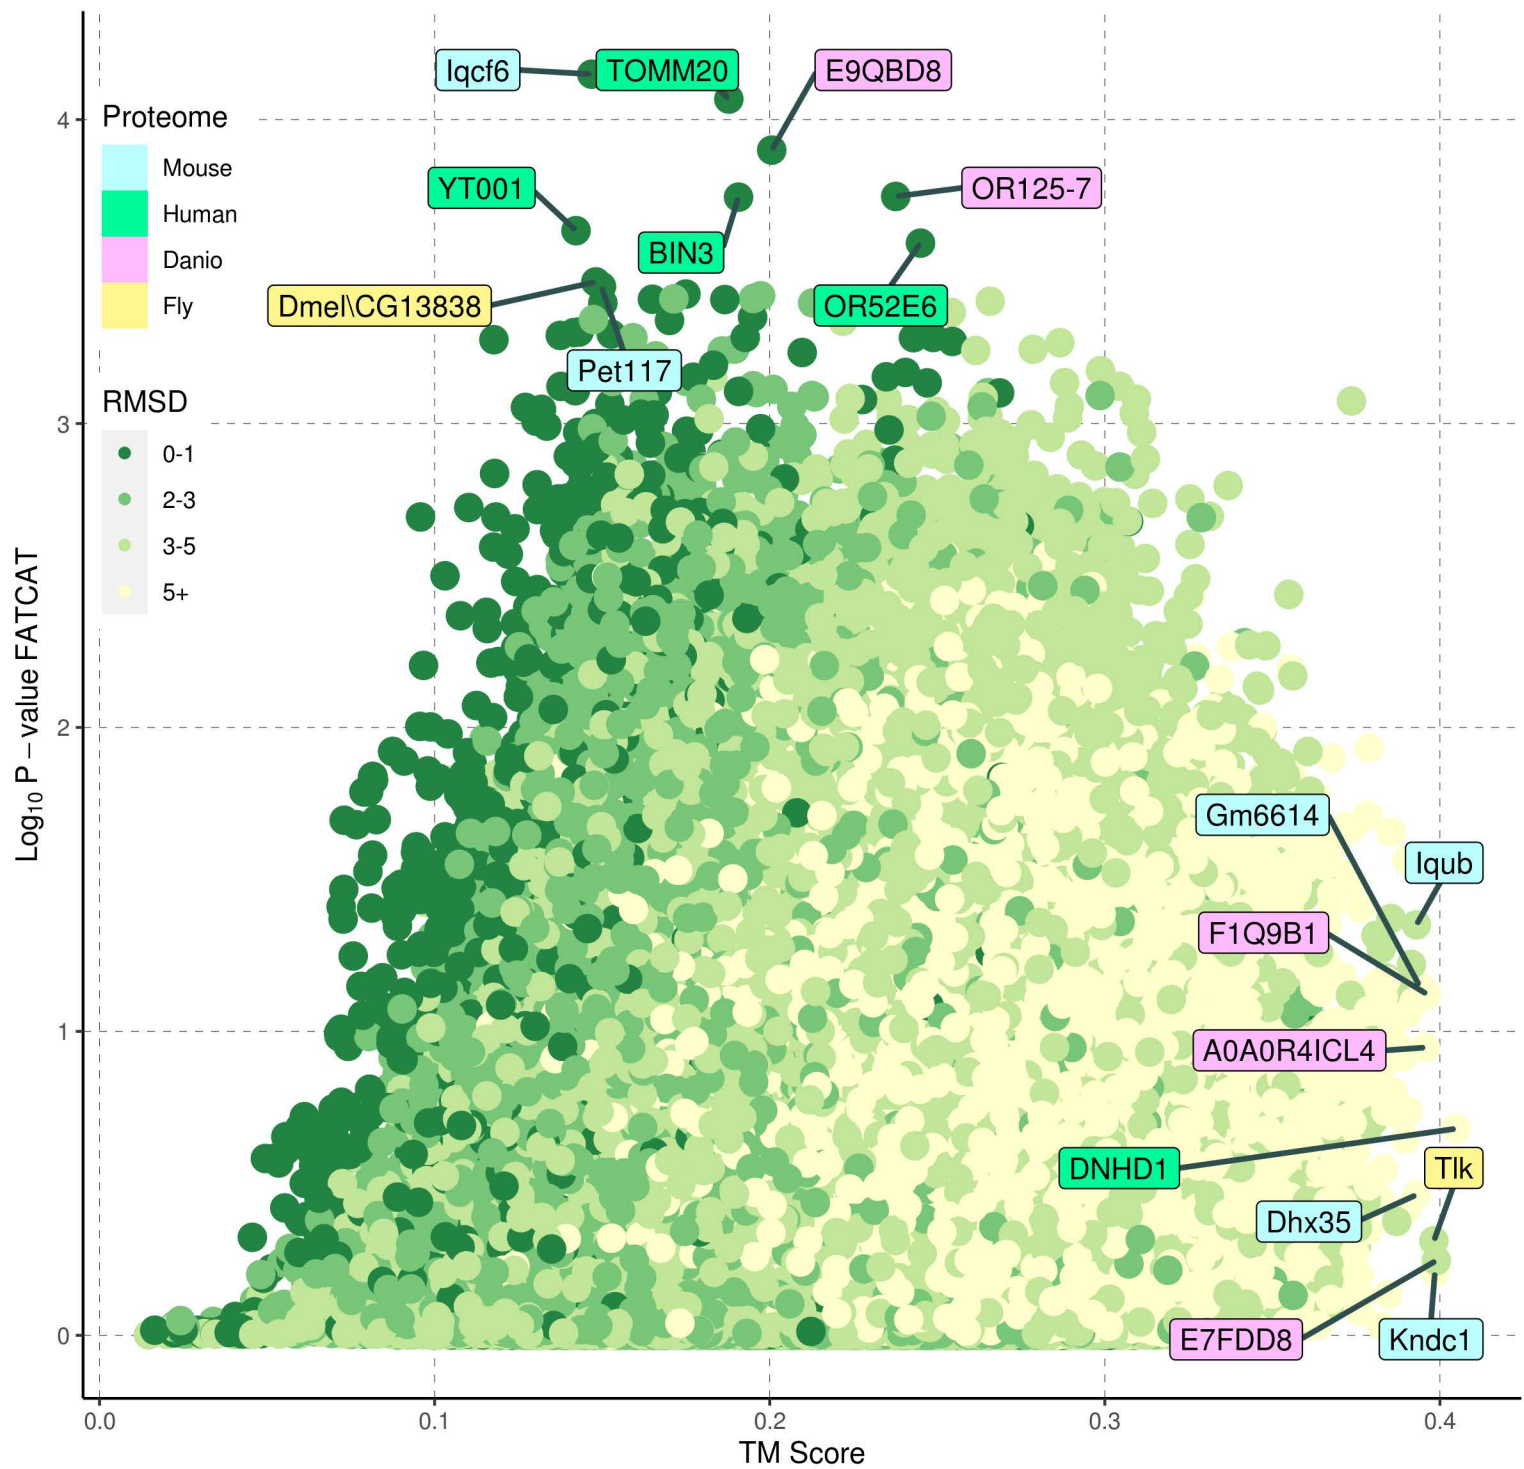



# E6 : No hits, top-scoring values are indicated

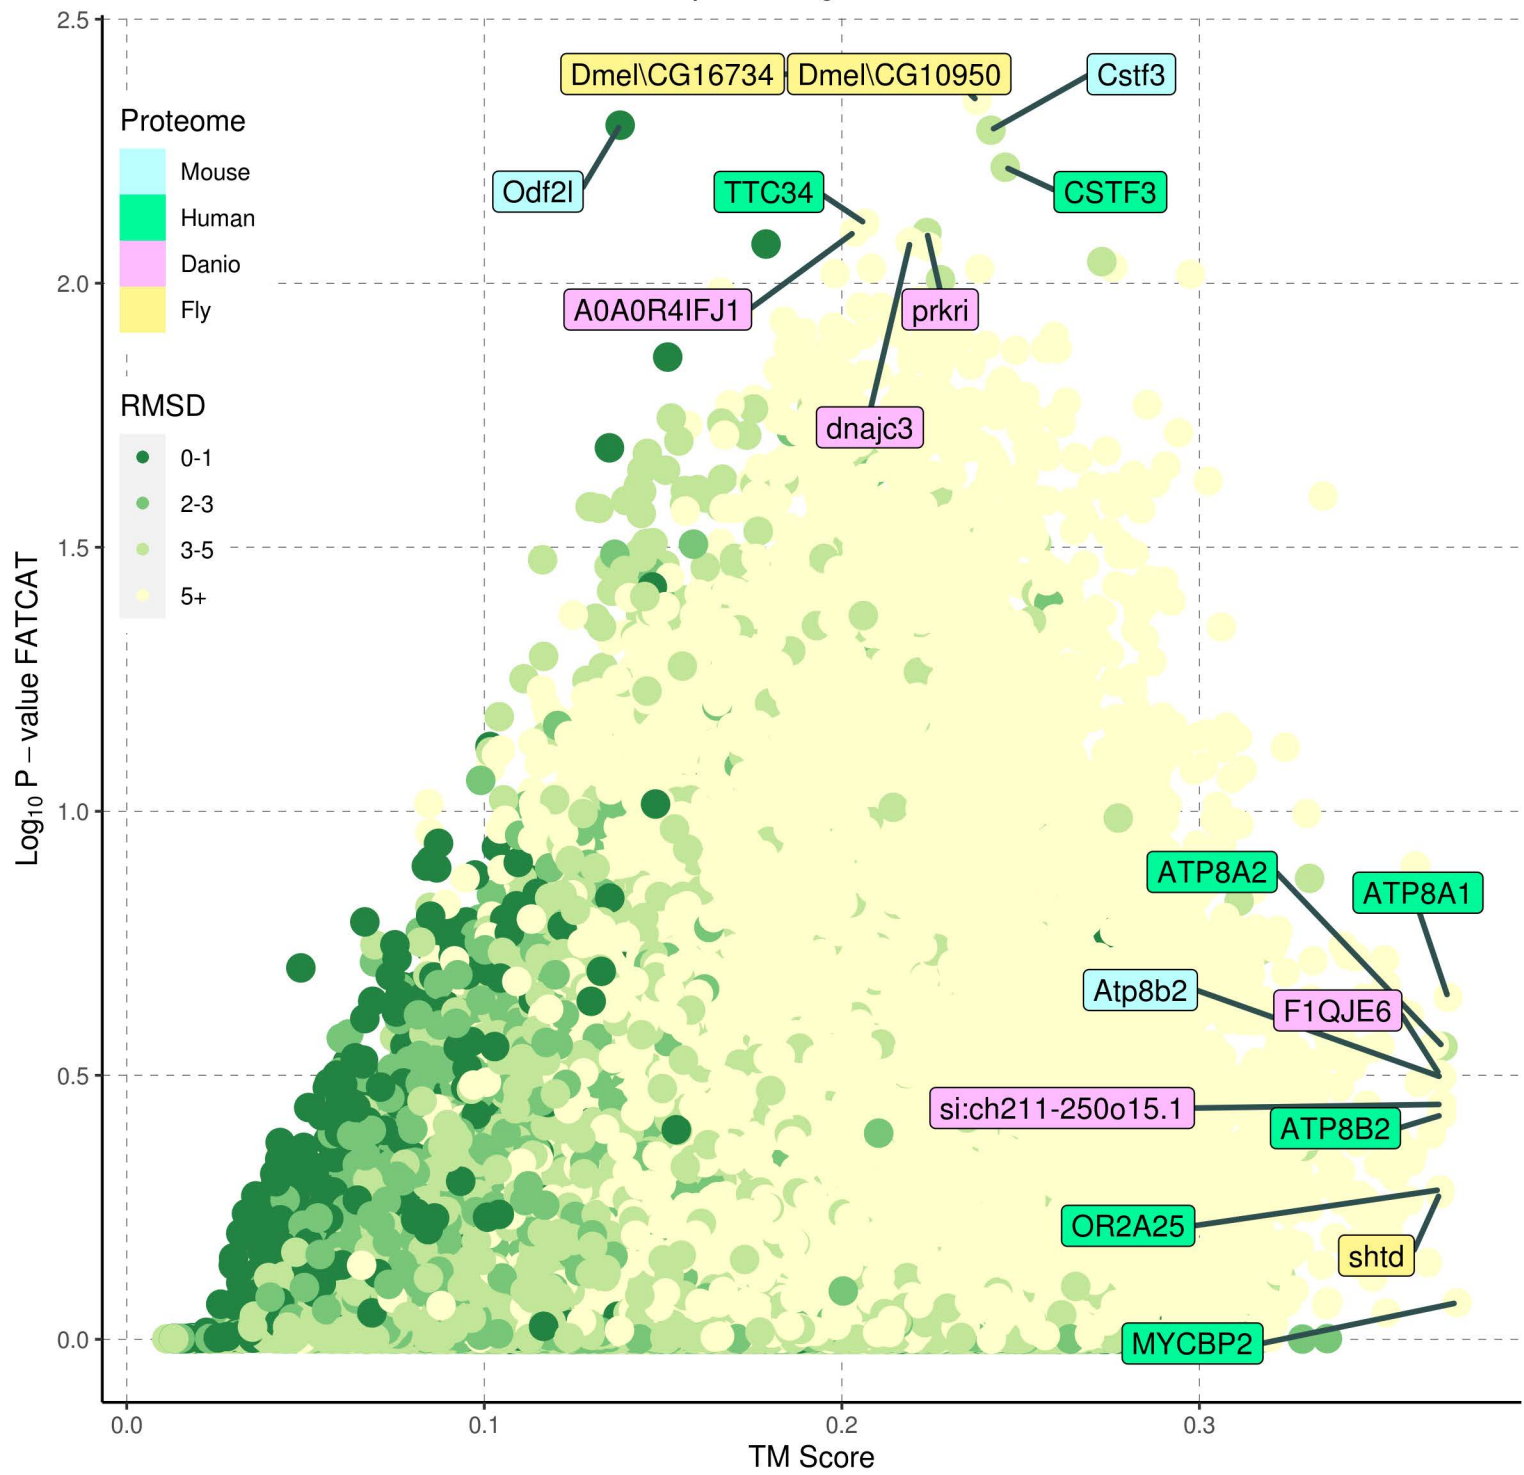

E7 : No hits, top-scoring values are indicated

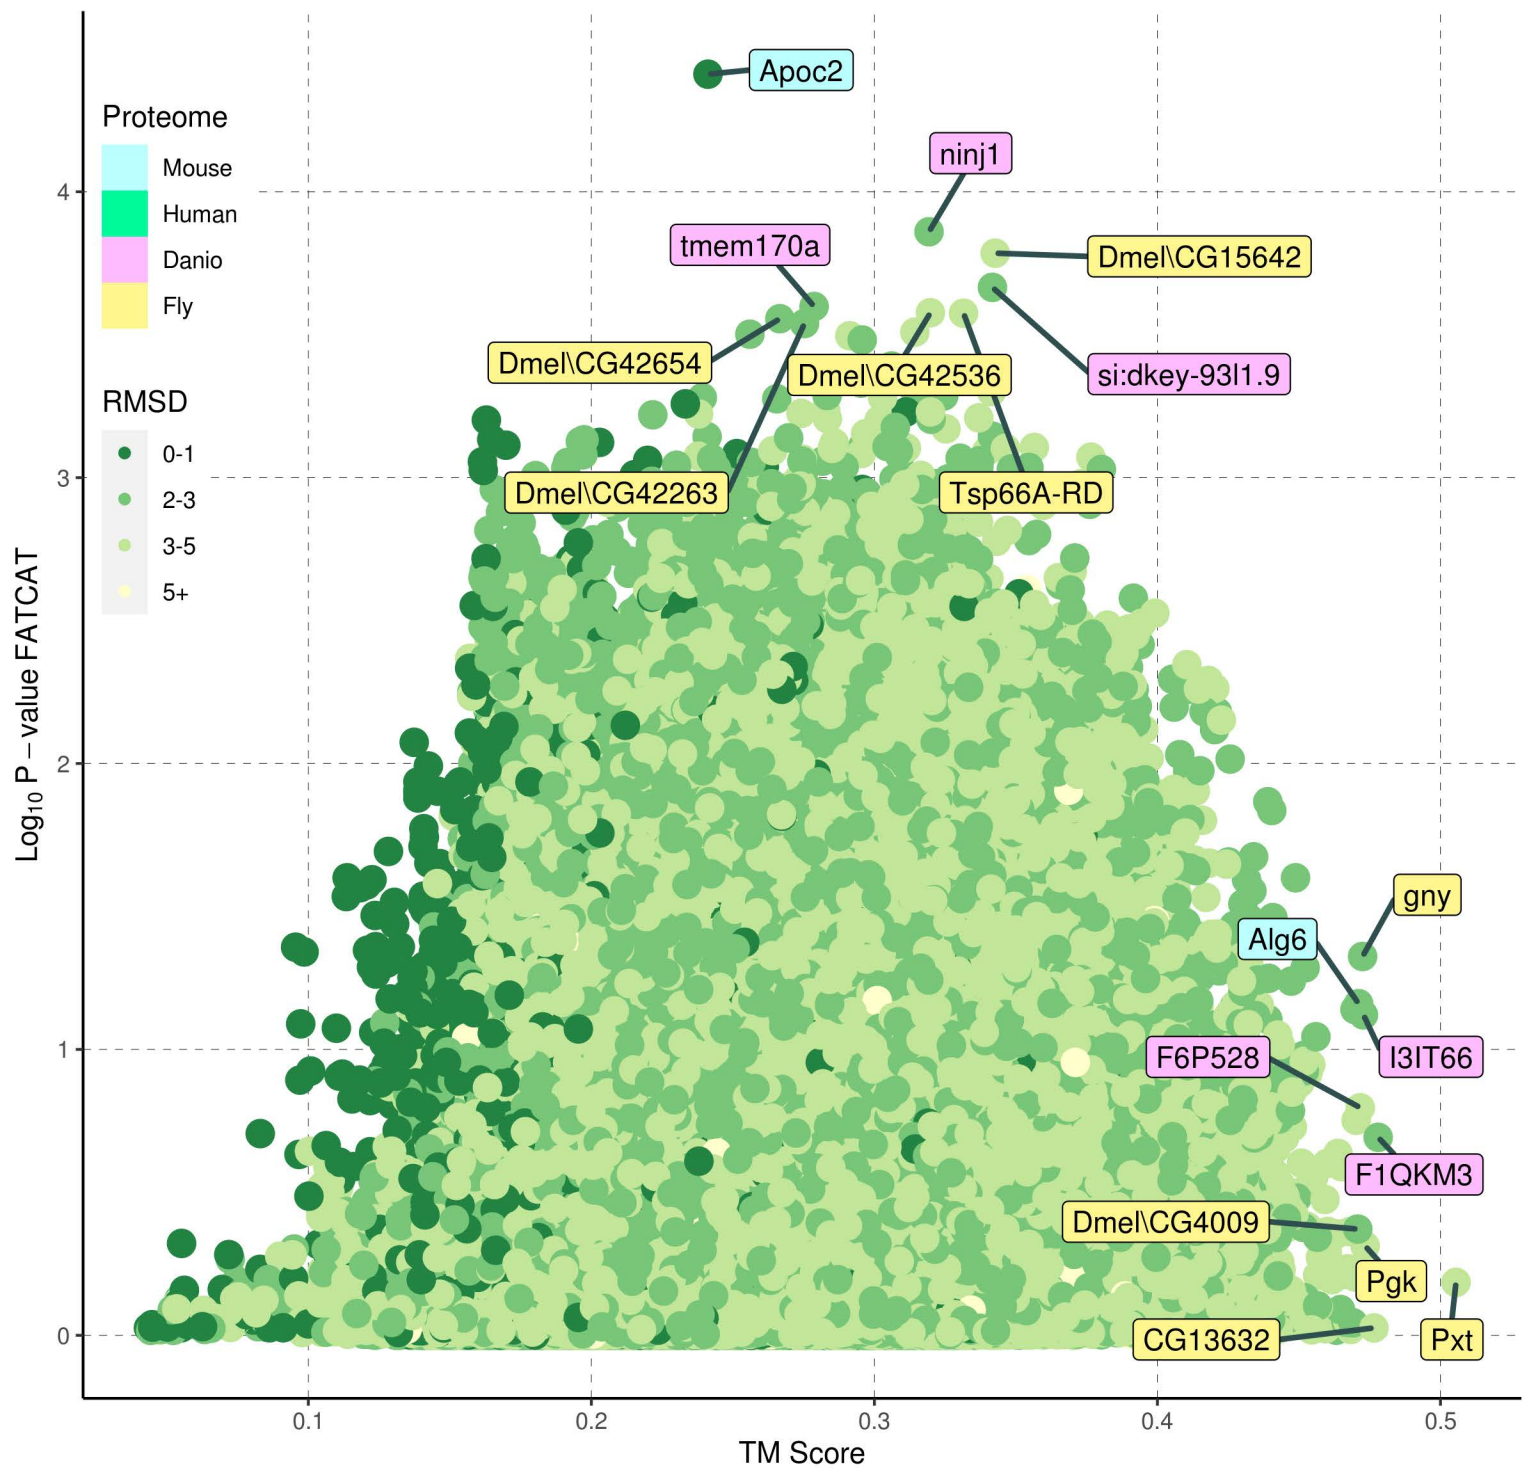

E8 : No hits, top-scoring values are indicated

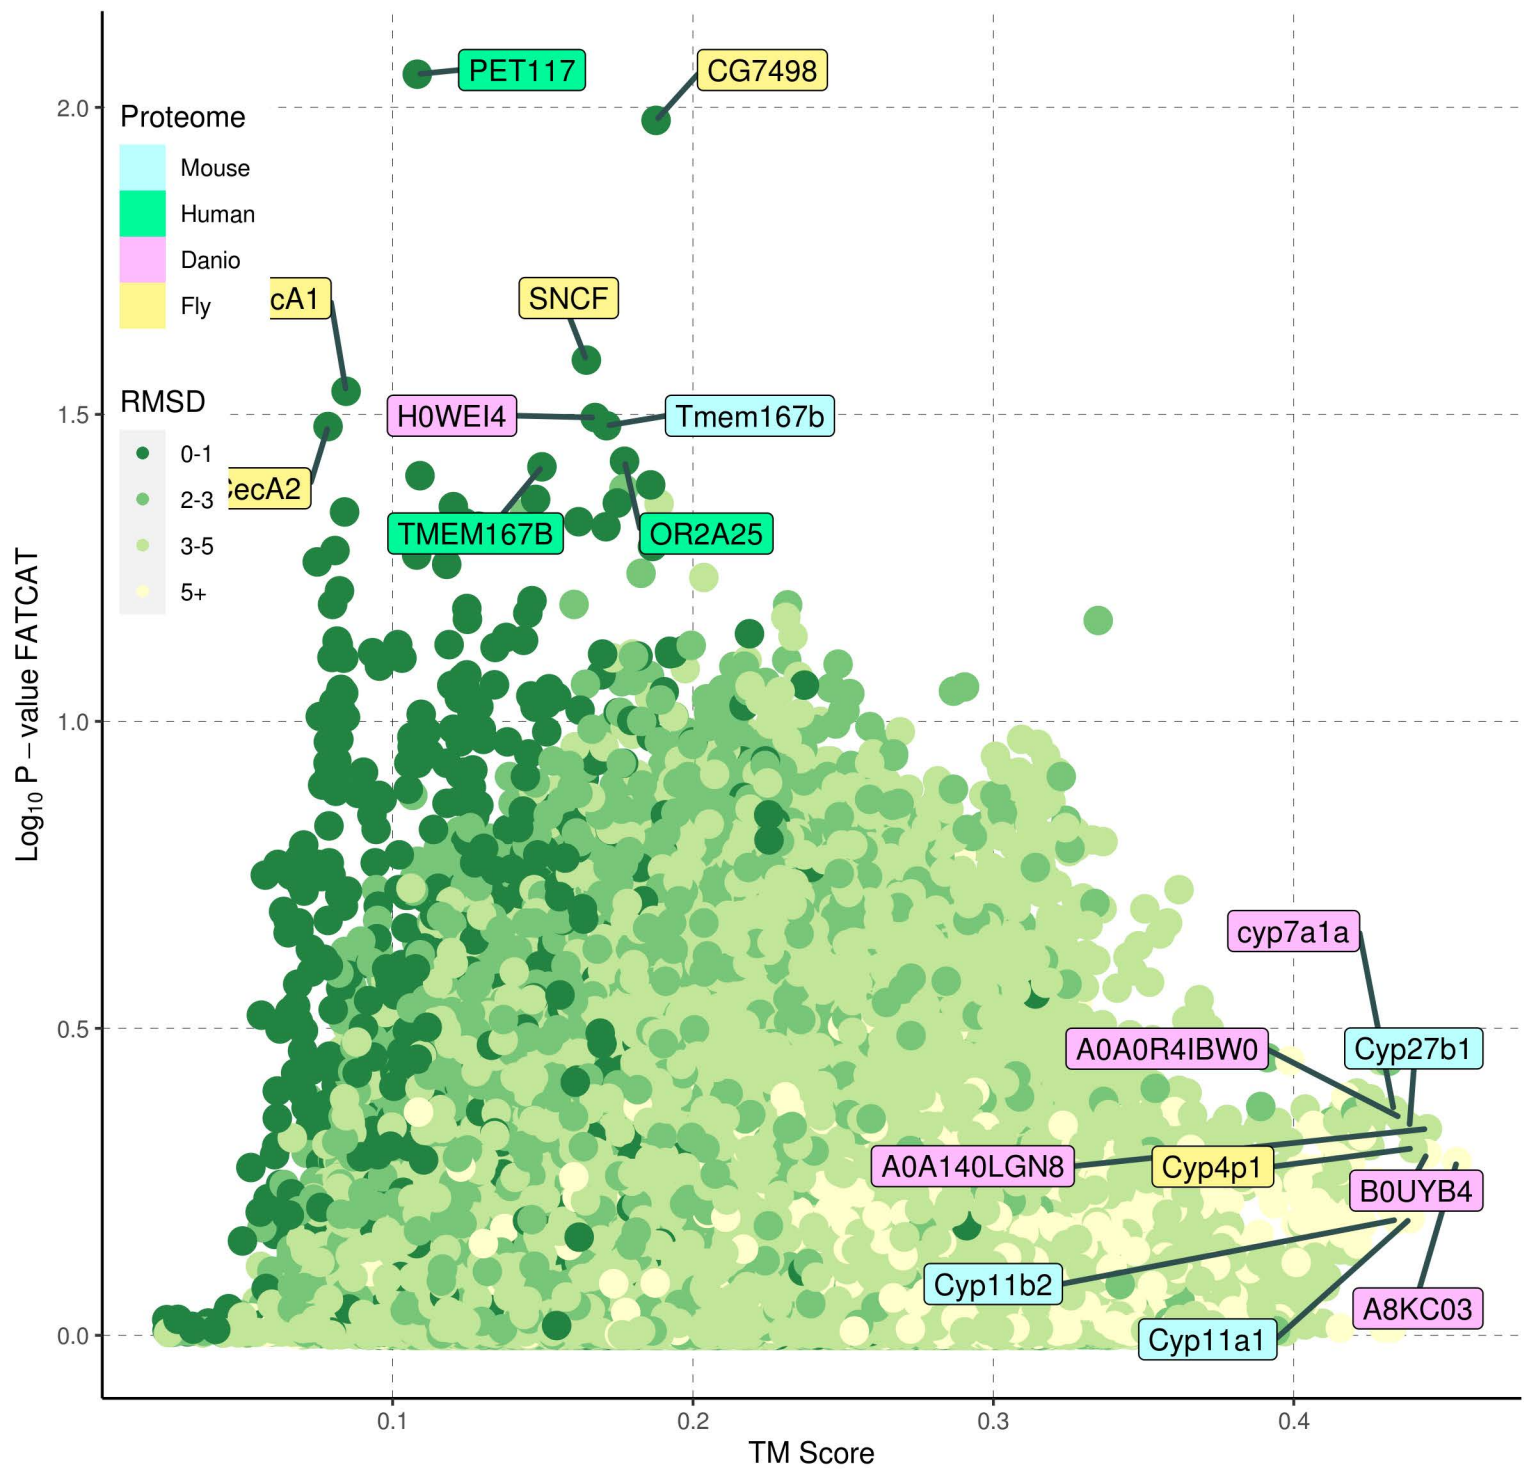

E9

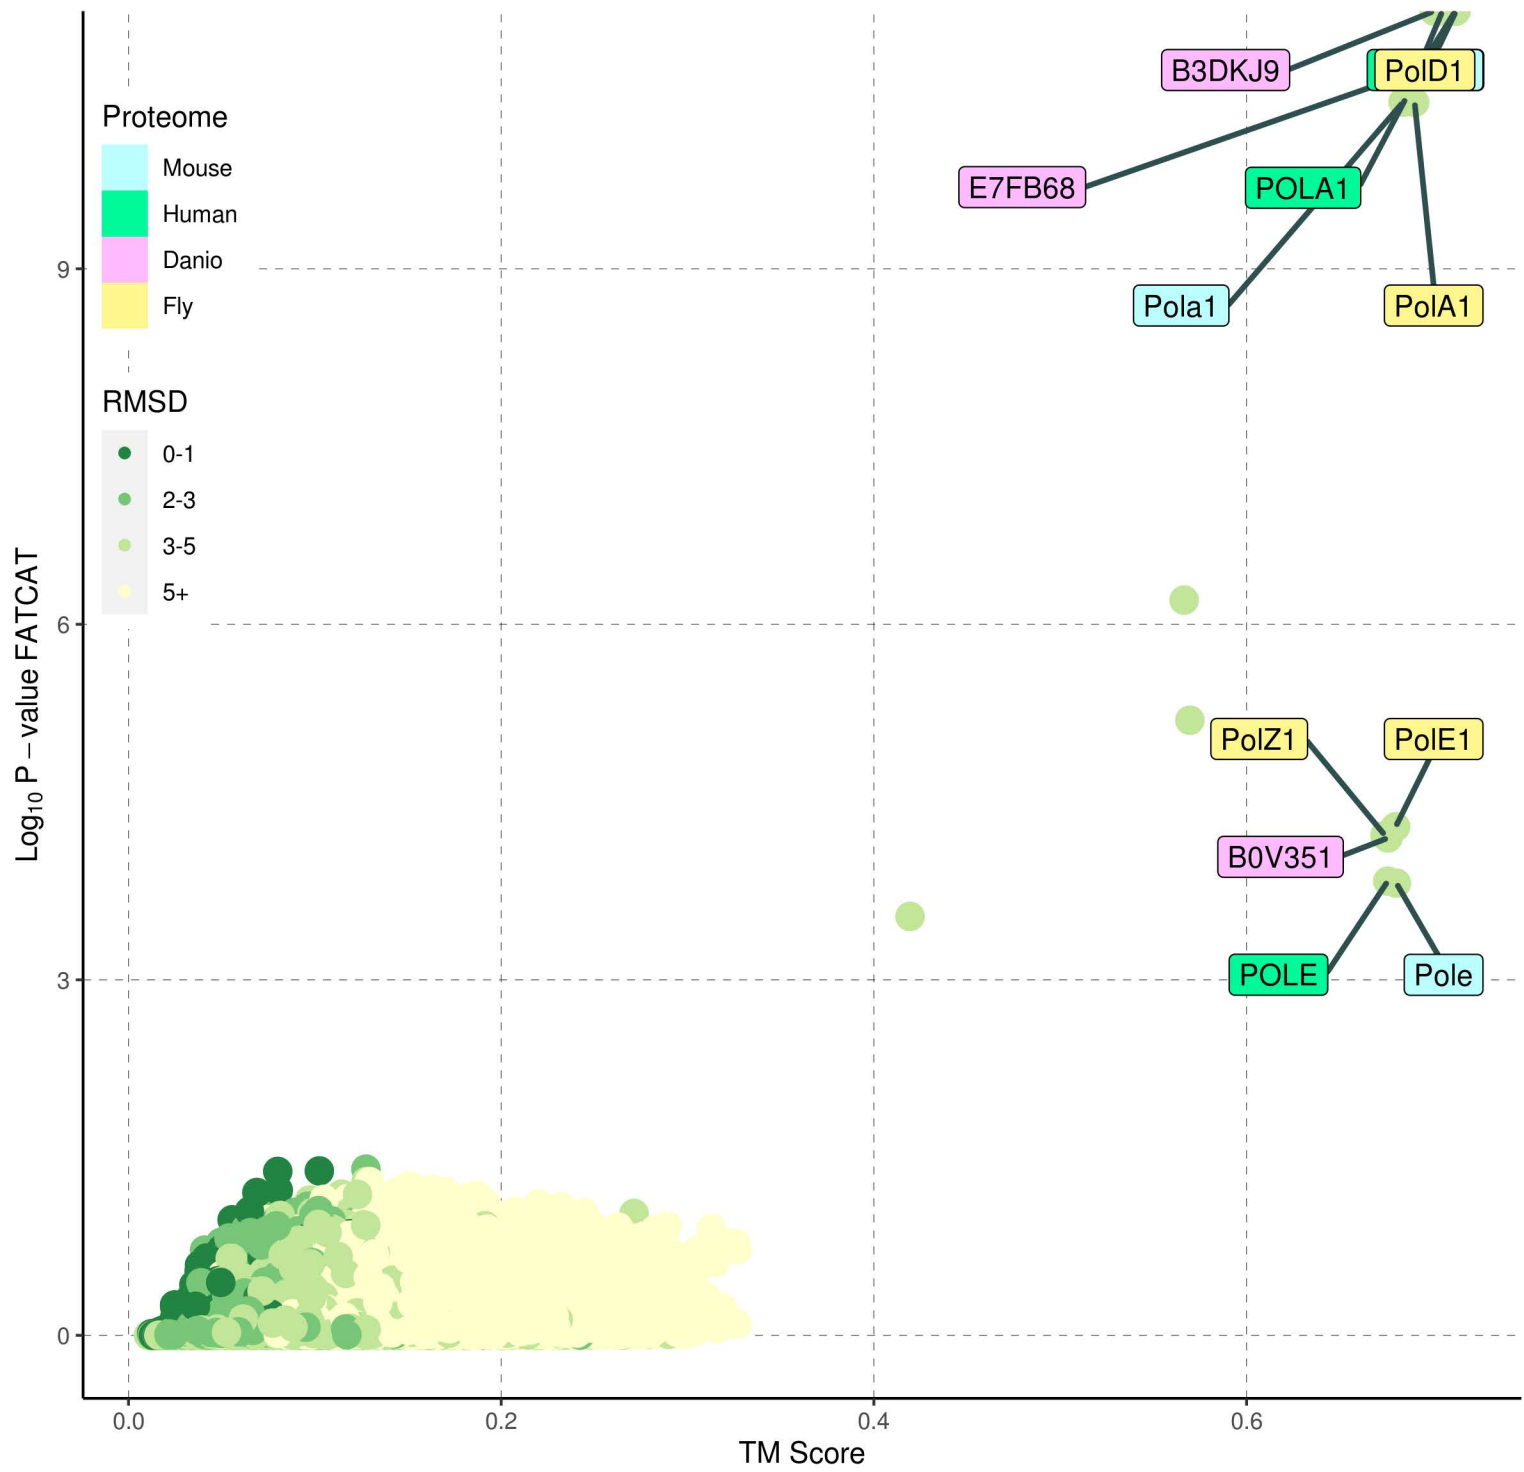



E11 : No hits, top-scoring values are indicated

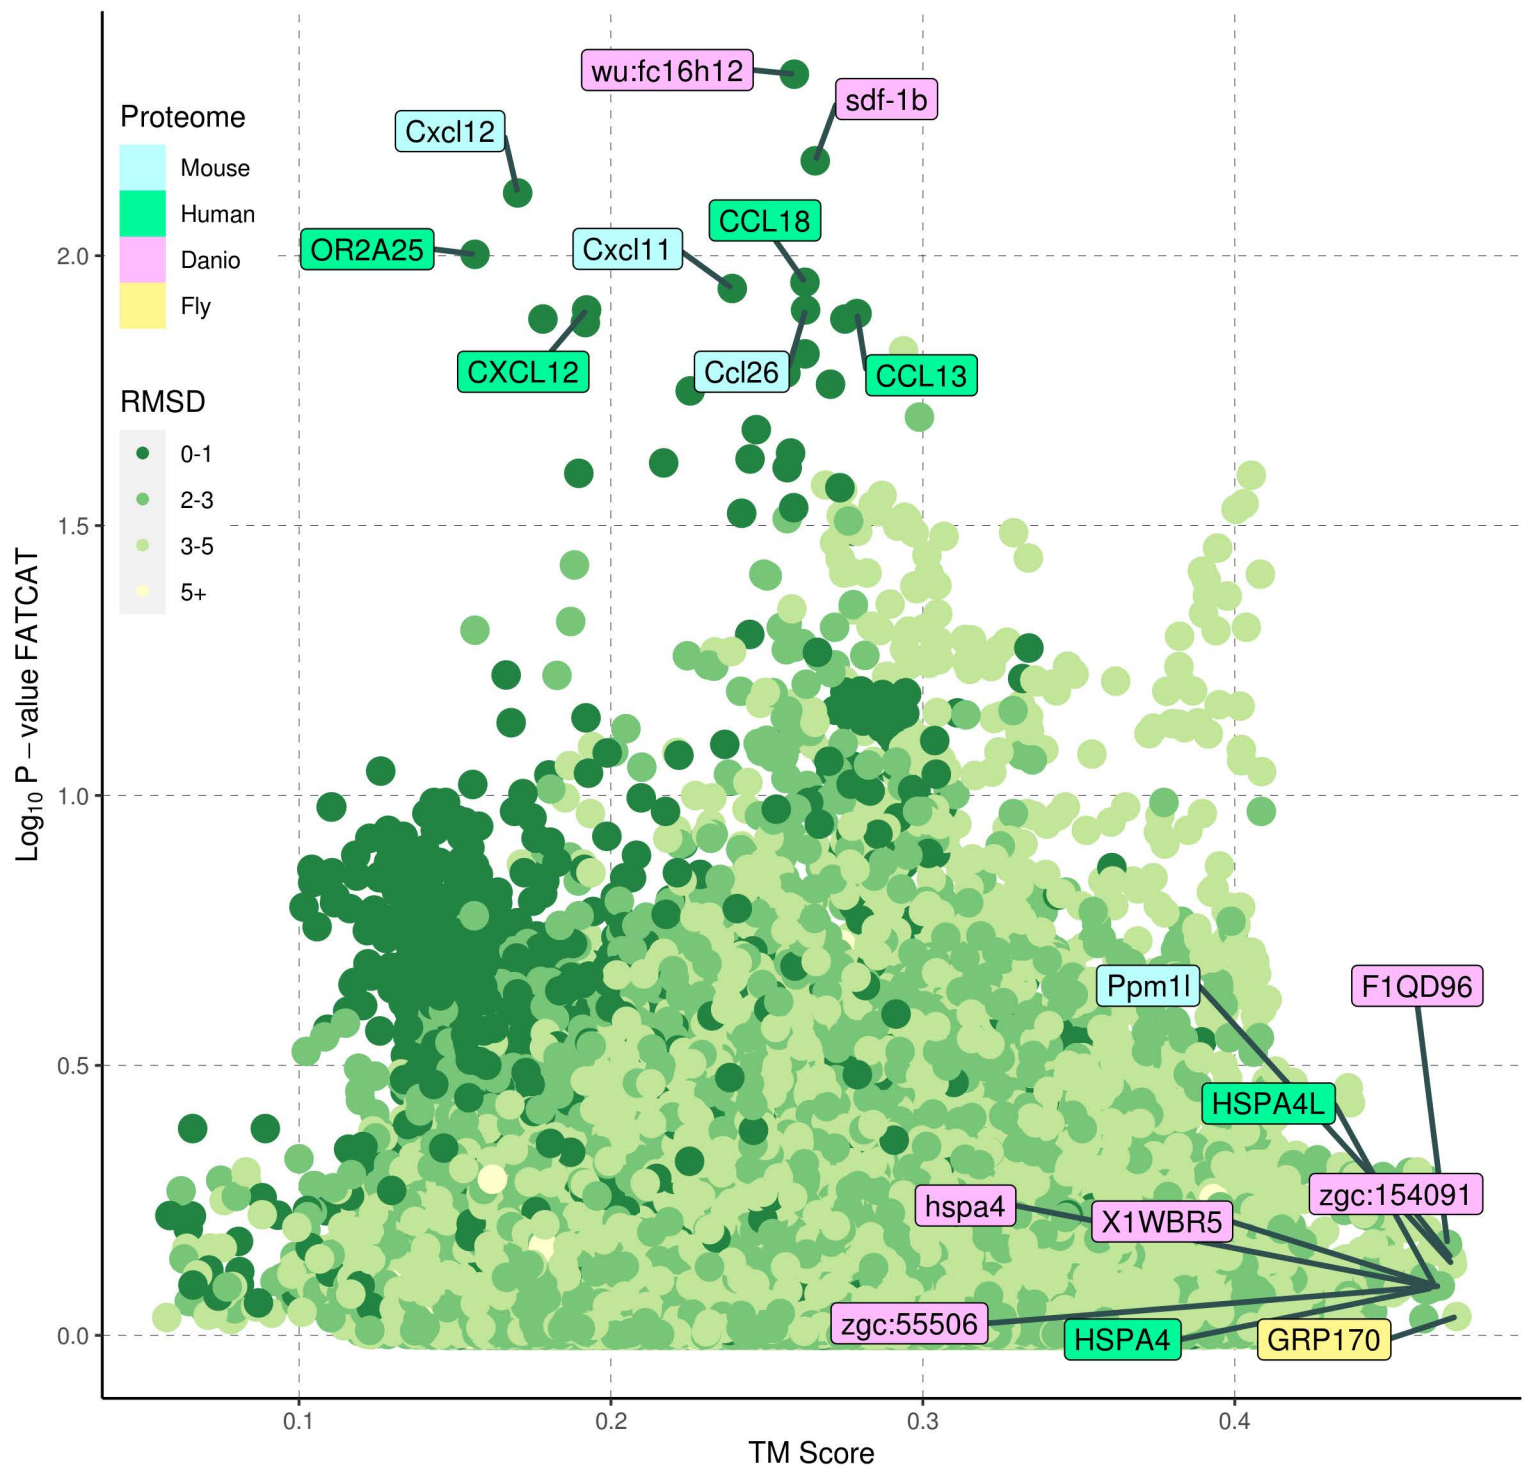

EorfA : No hits, top-scoring values are indicated

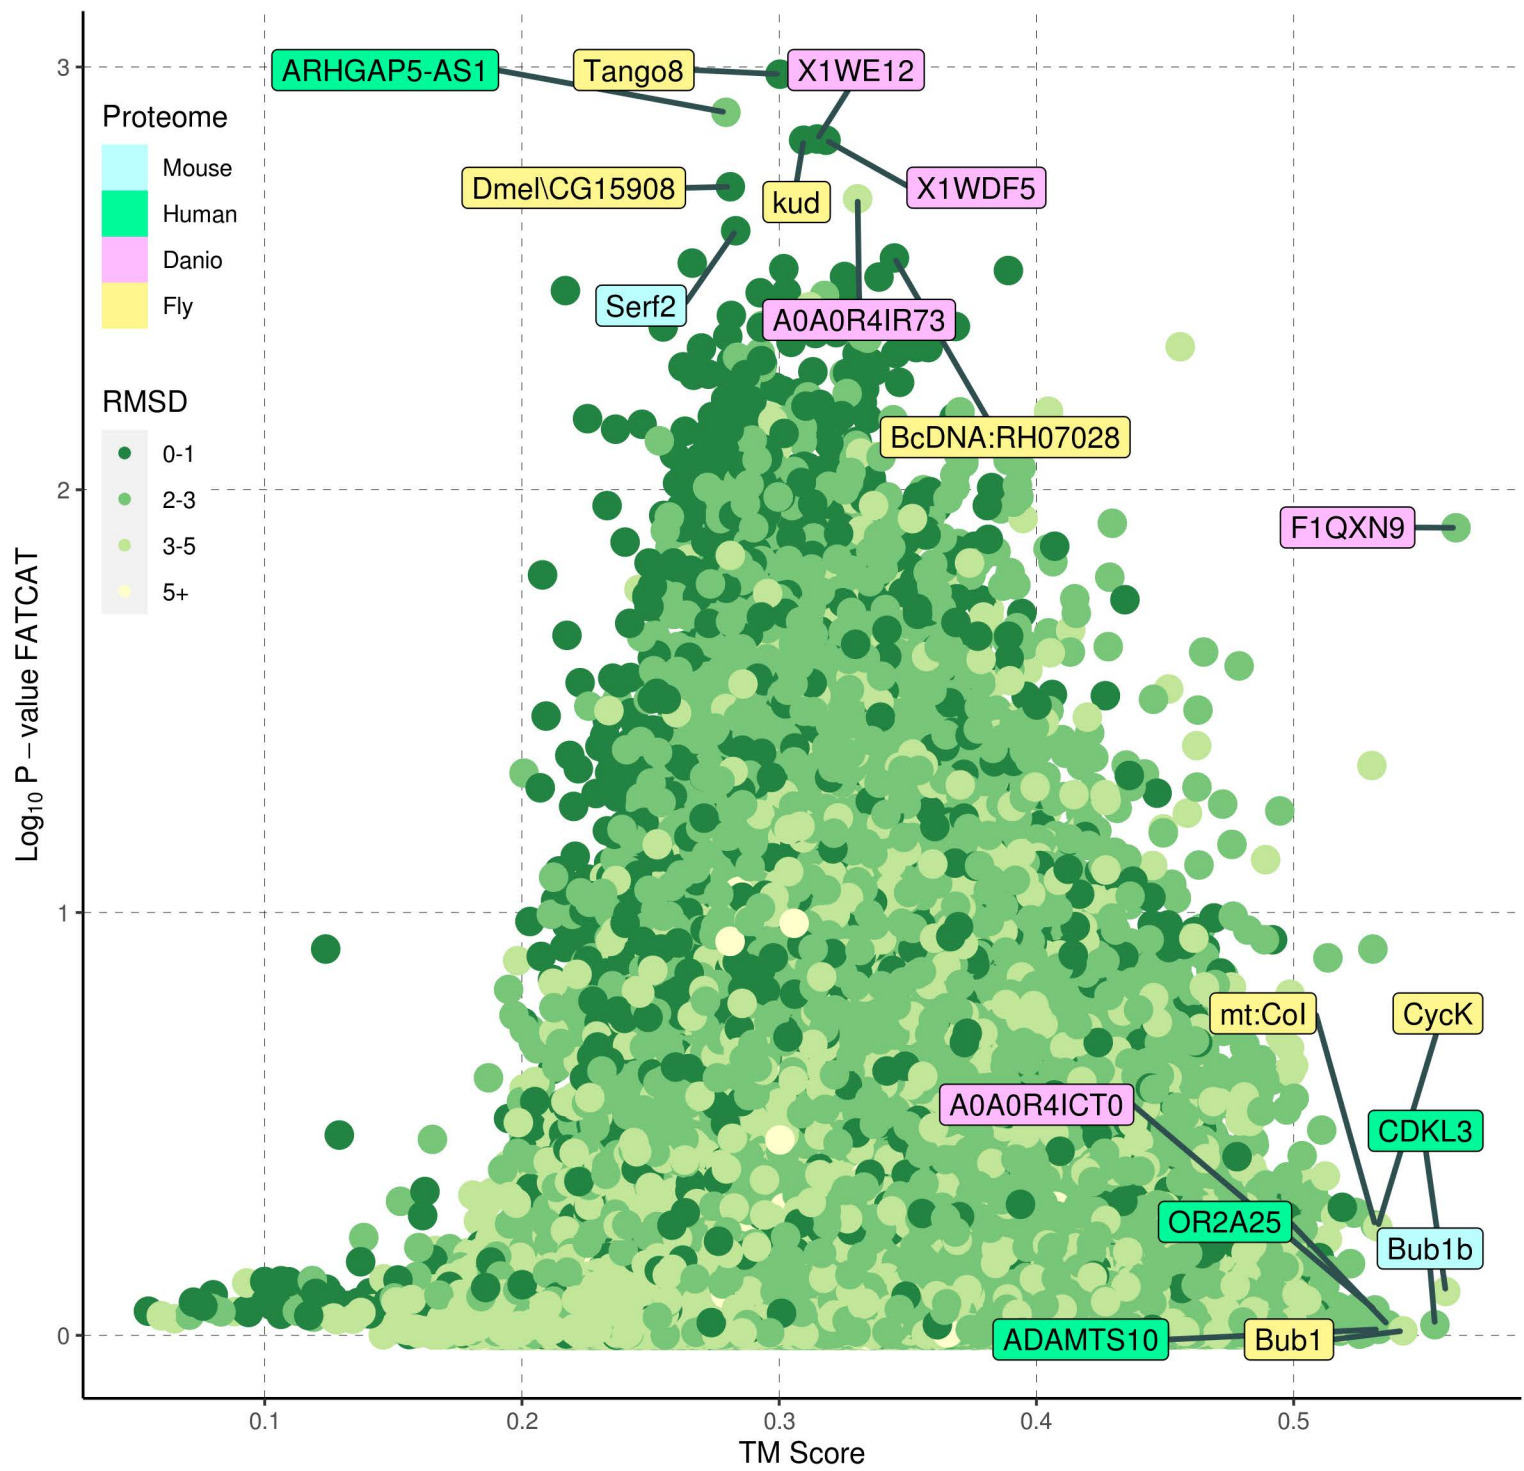

# EorfB

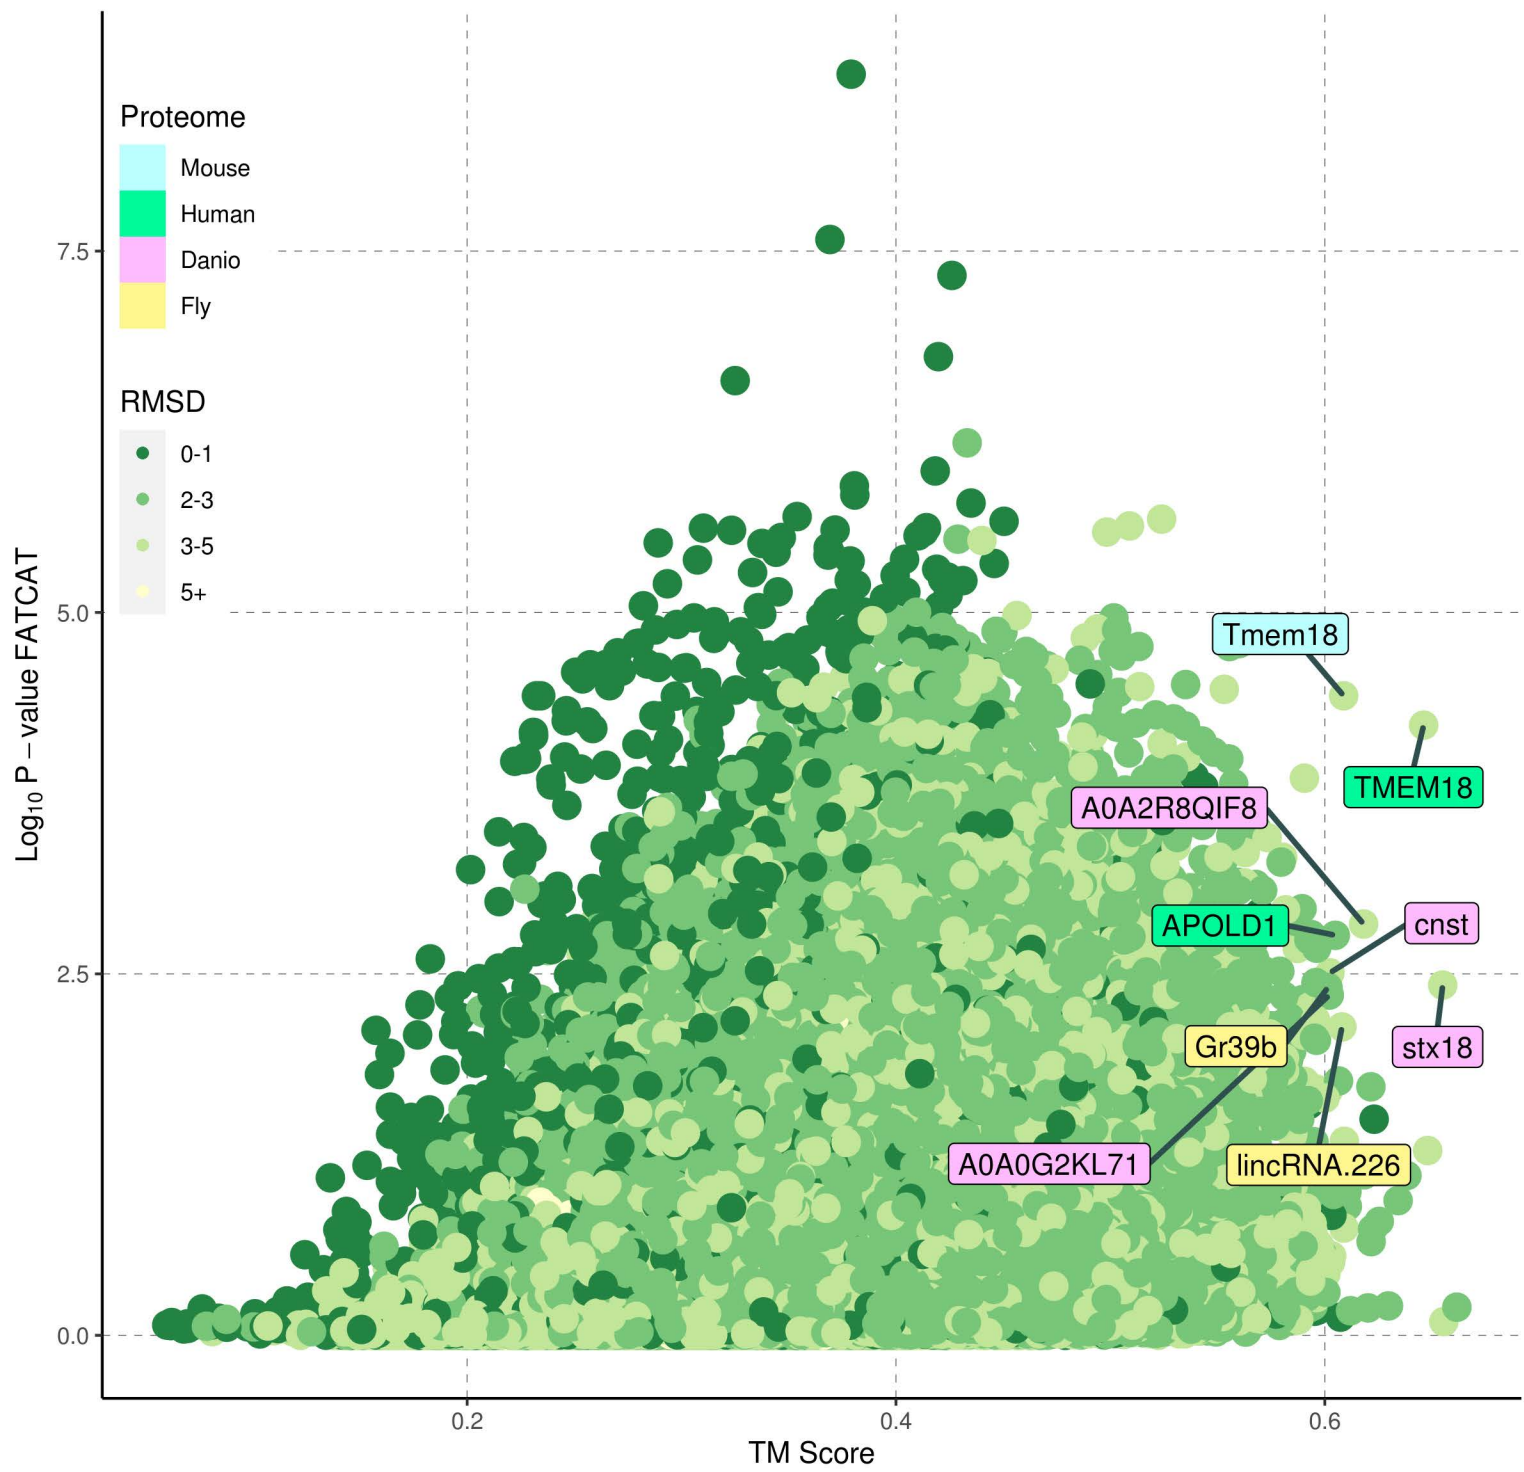



EorfC : No hits, top-scoring values are indicated

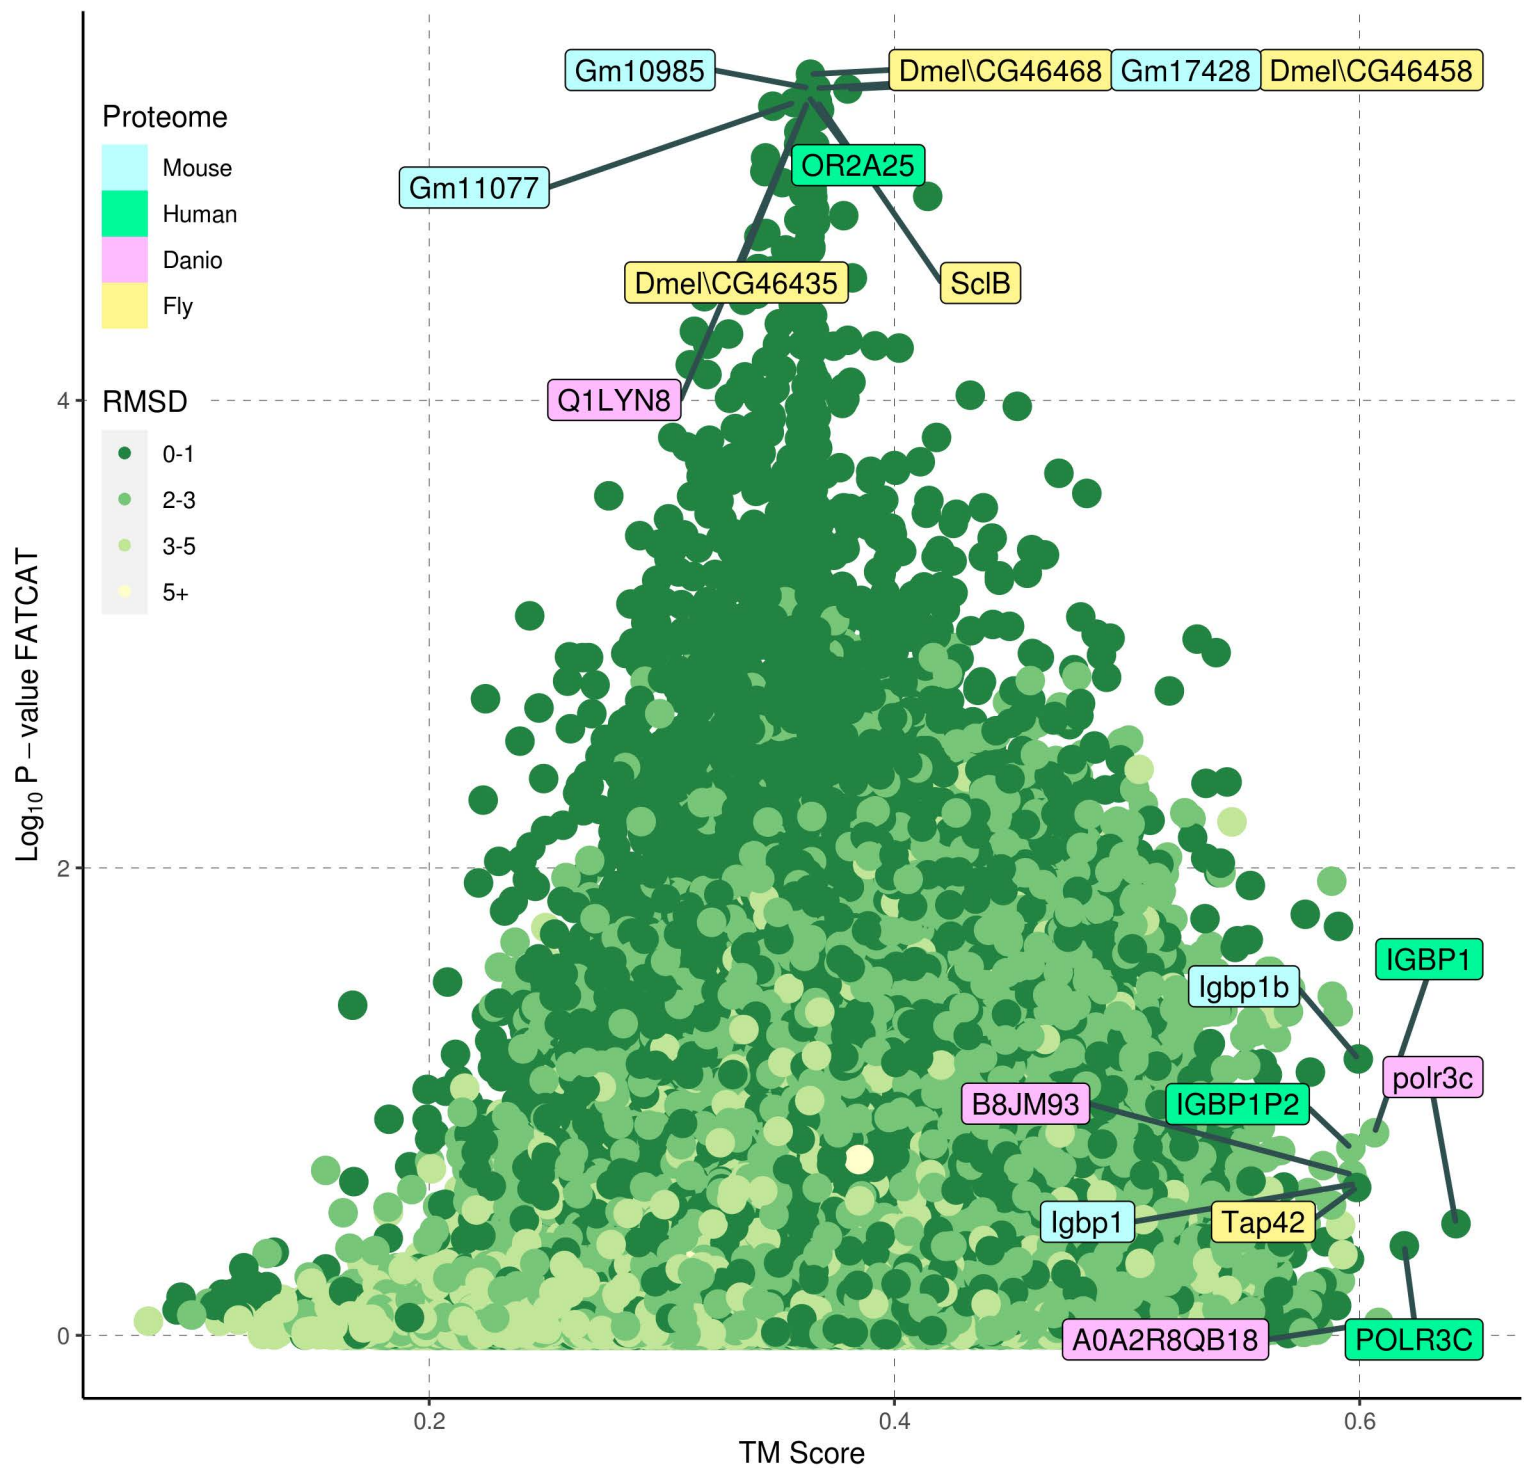

# EorfD : No hits, top-scoring values are indicated

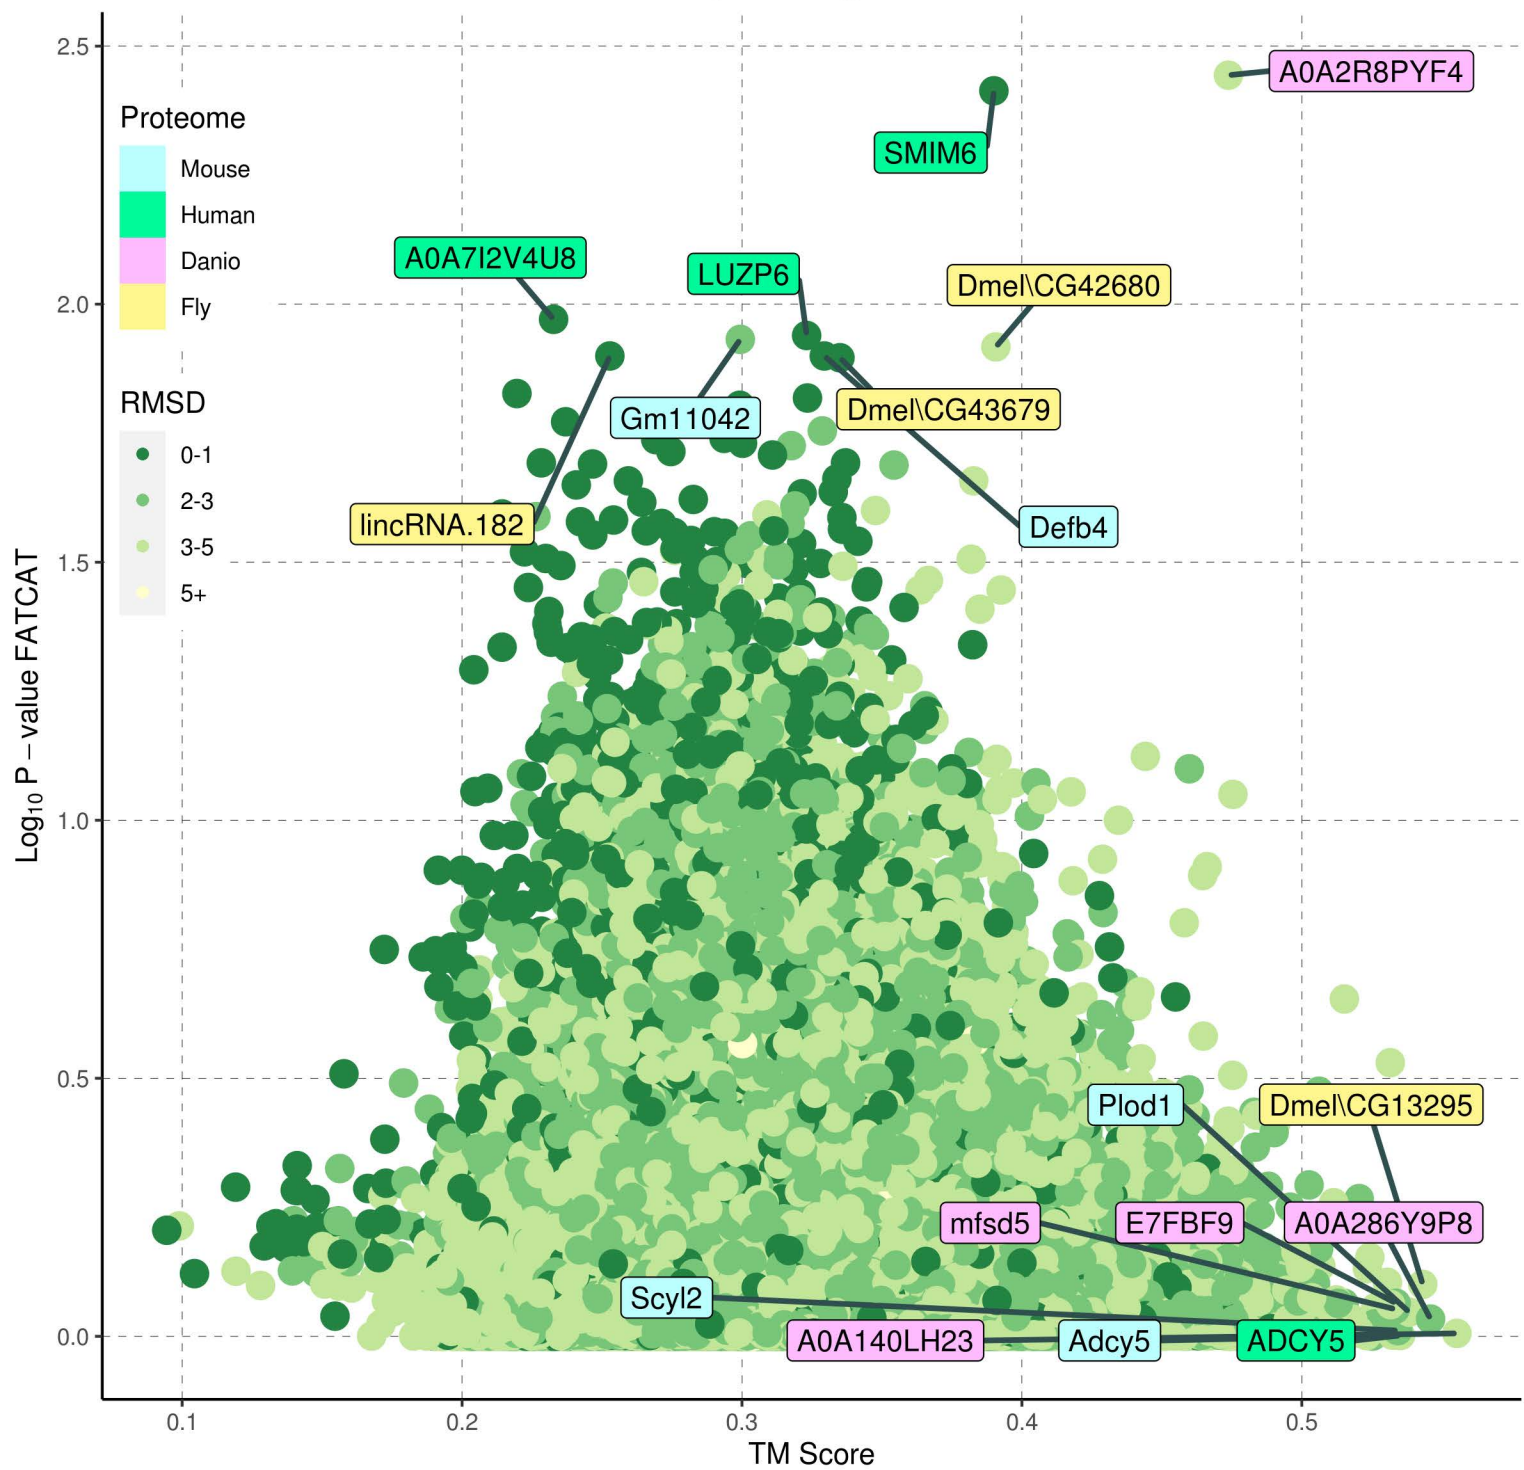

## EorfE

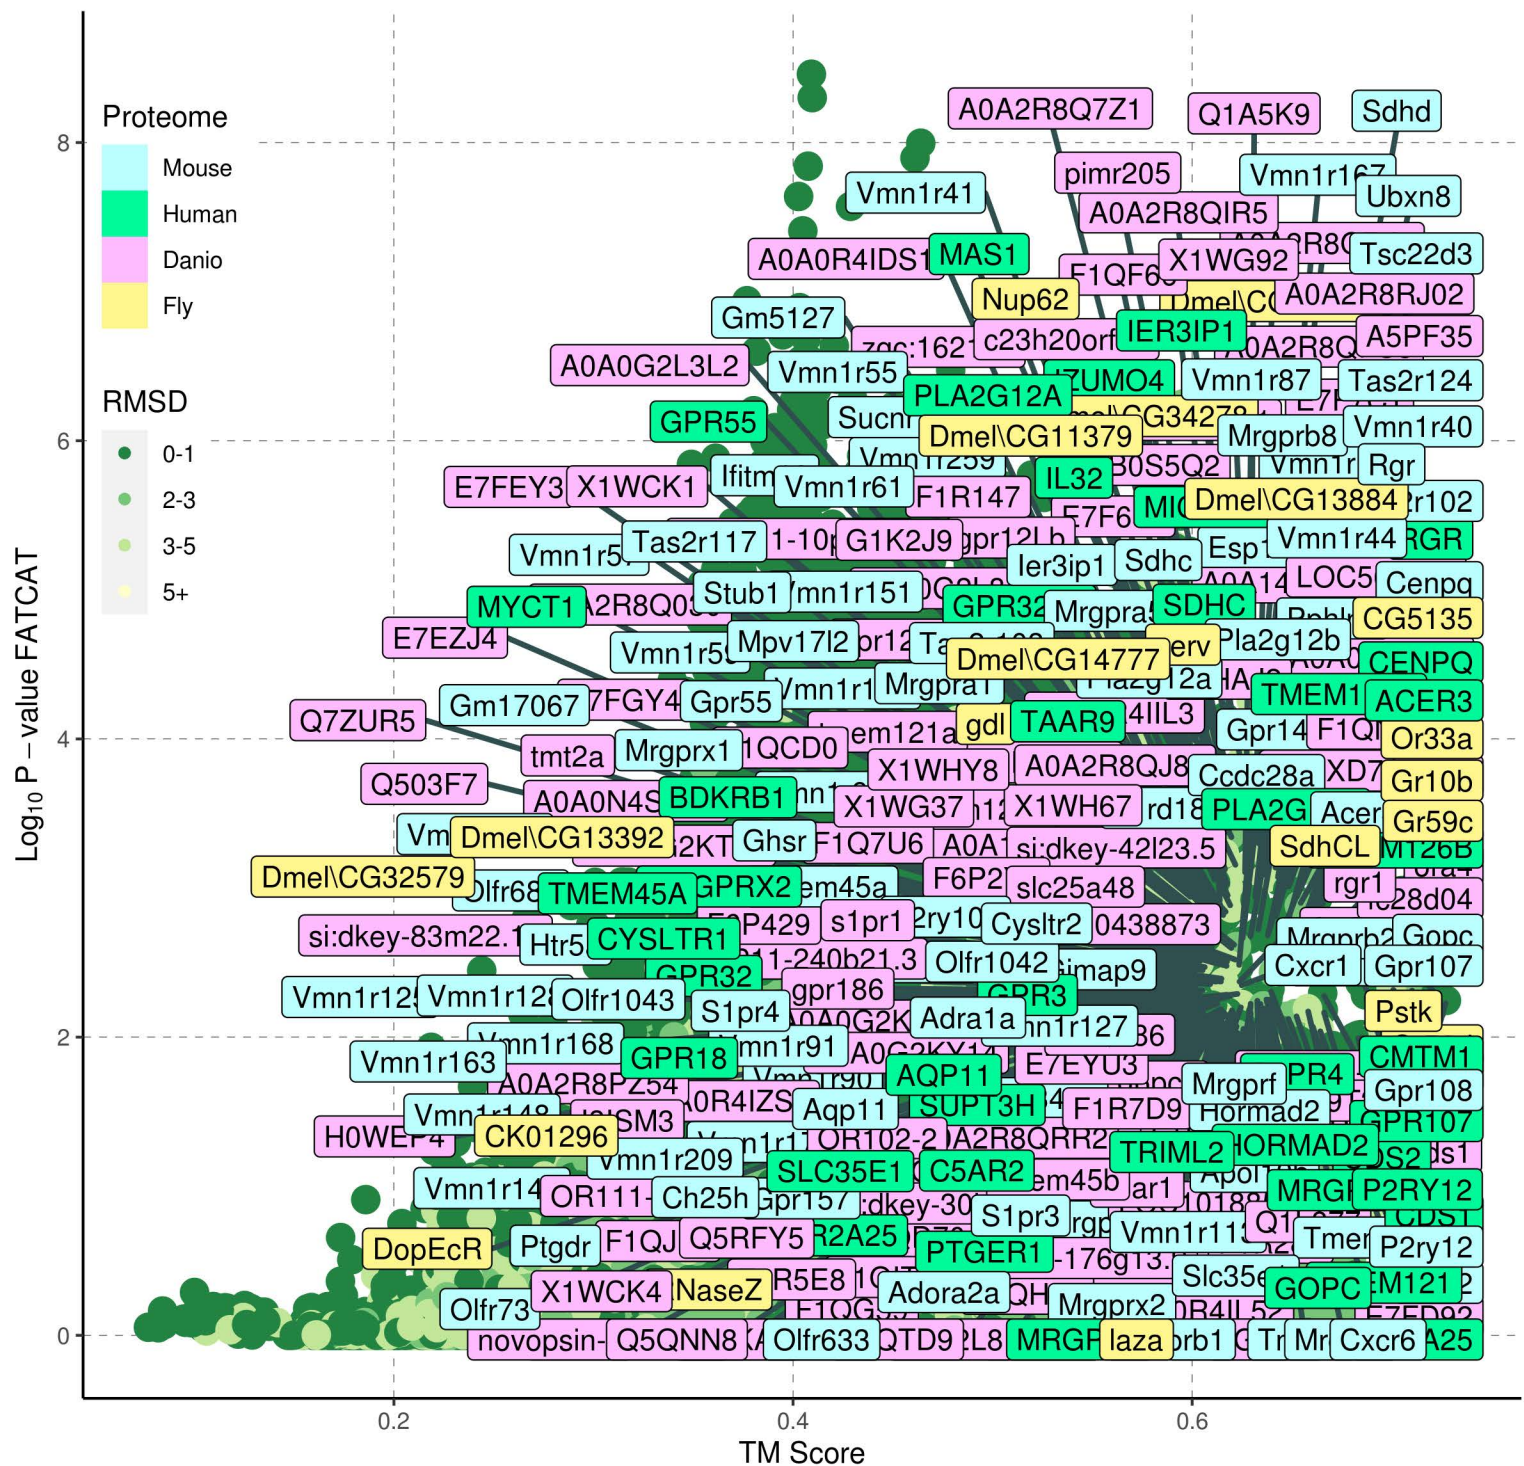

## EorfF

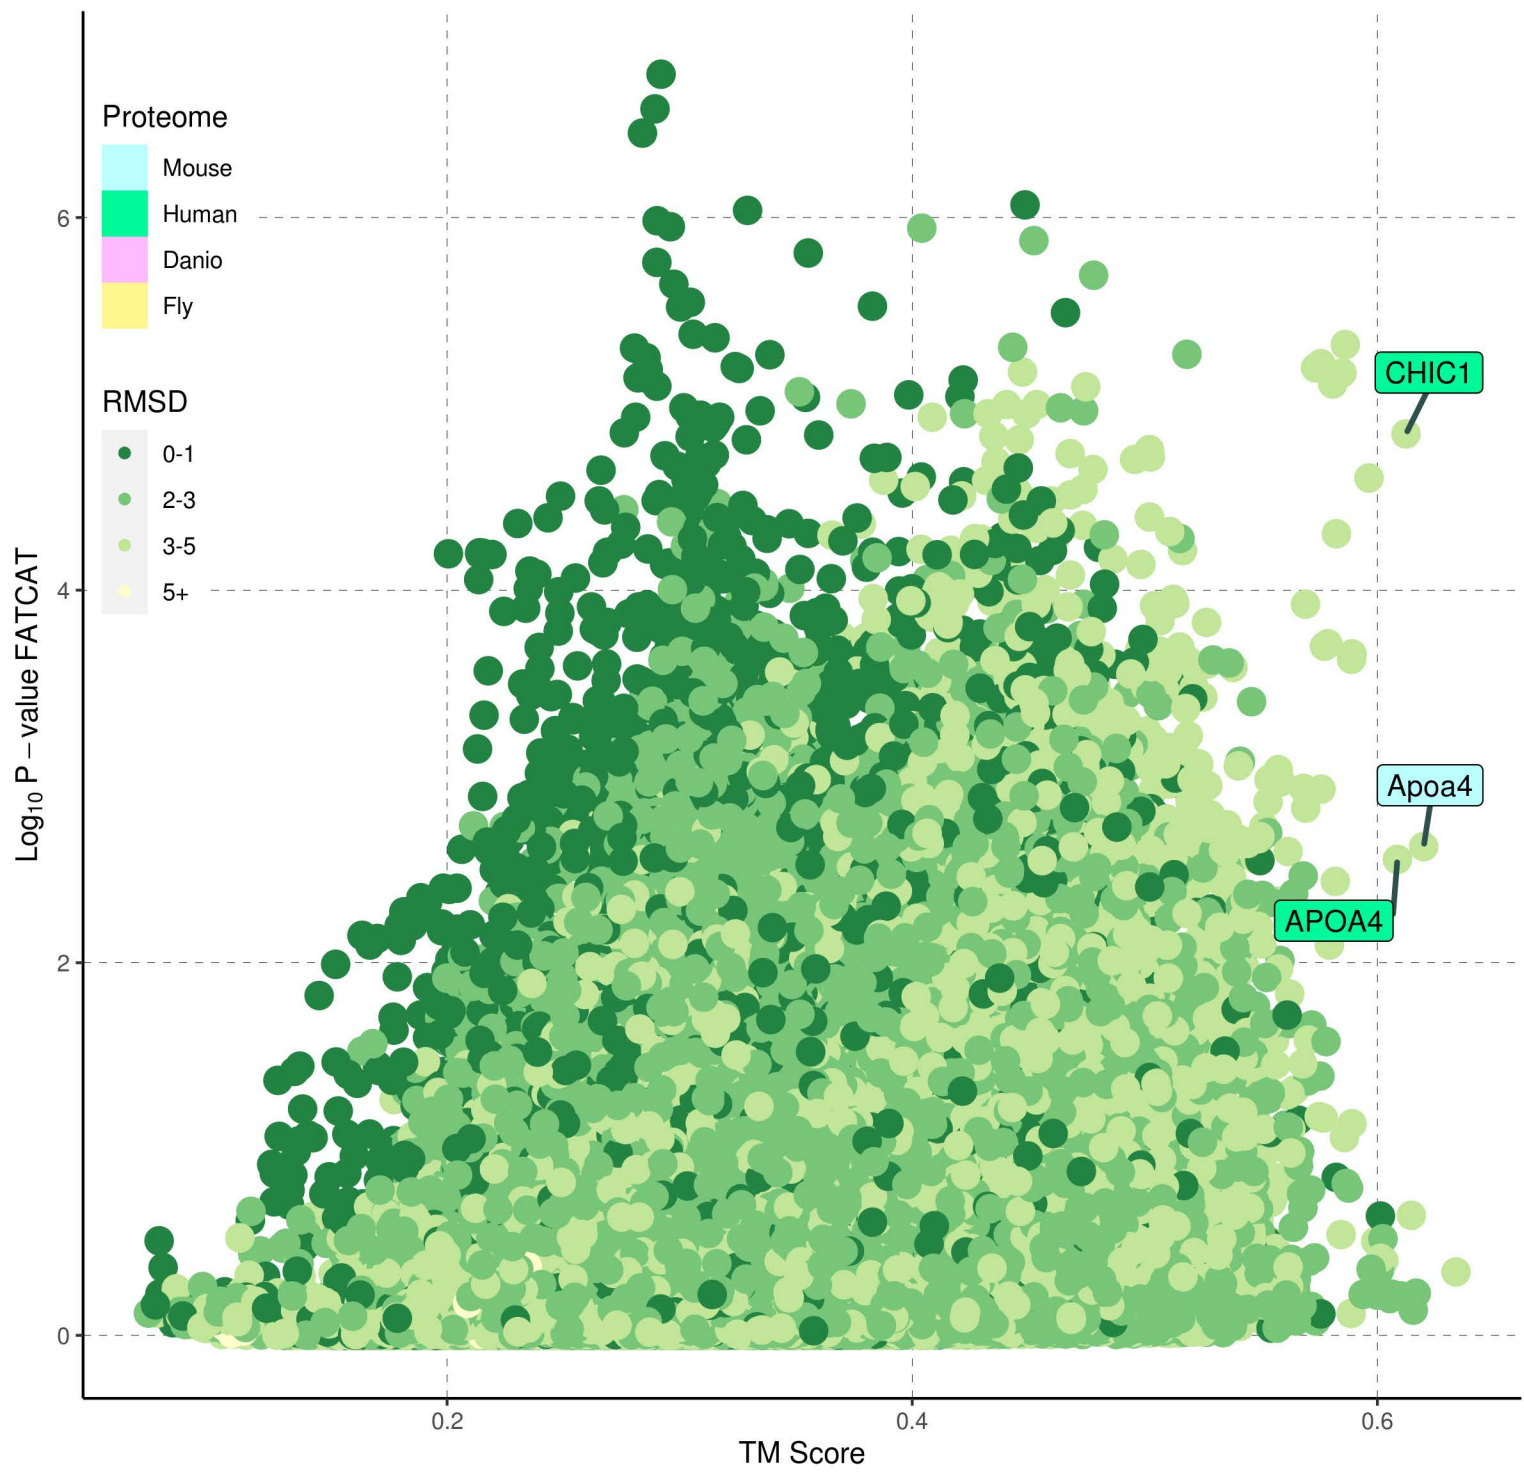

F1 : No hits, top-scoring values are indicated

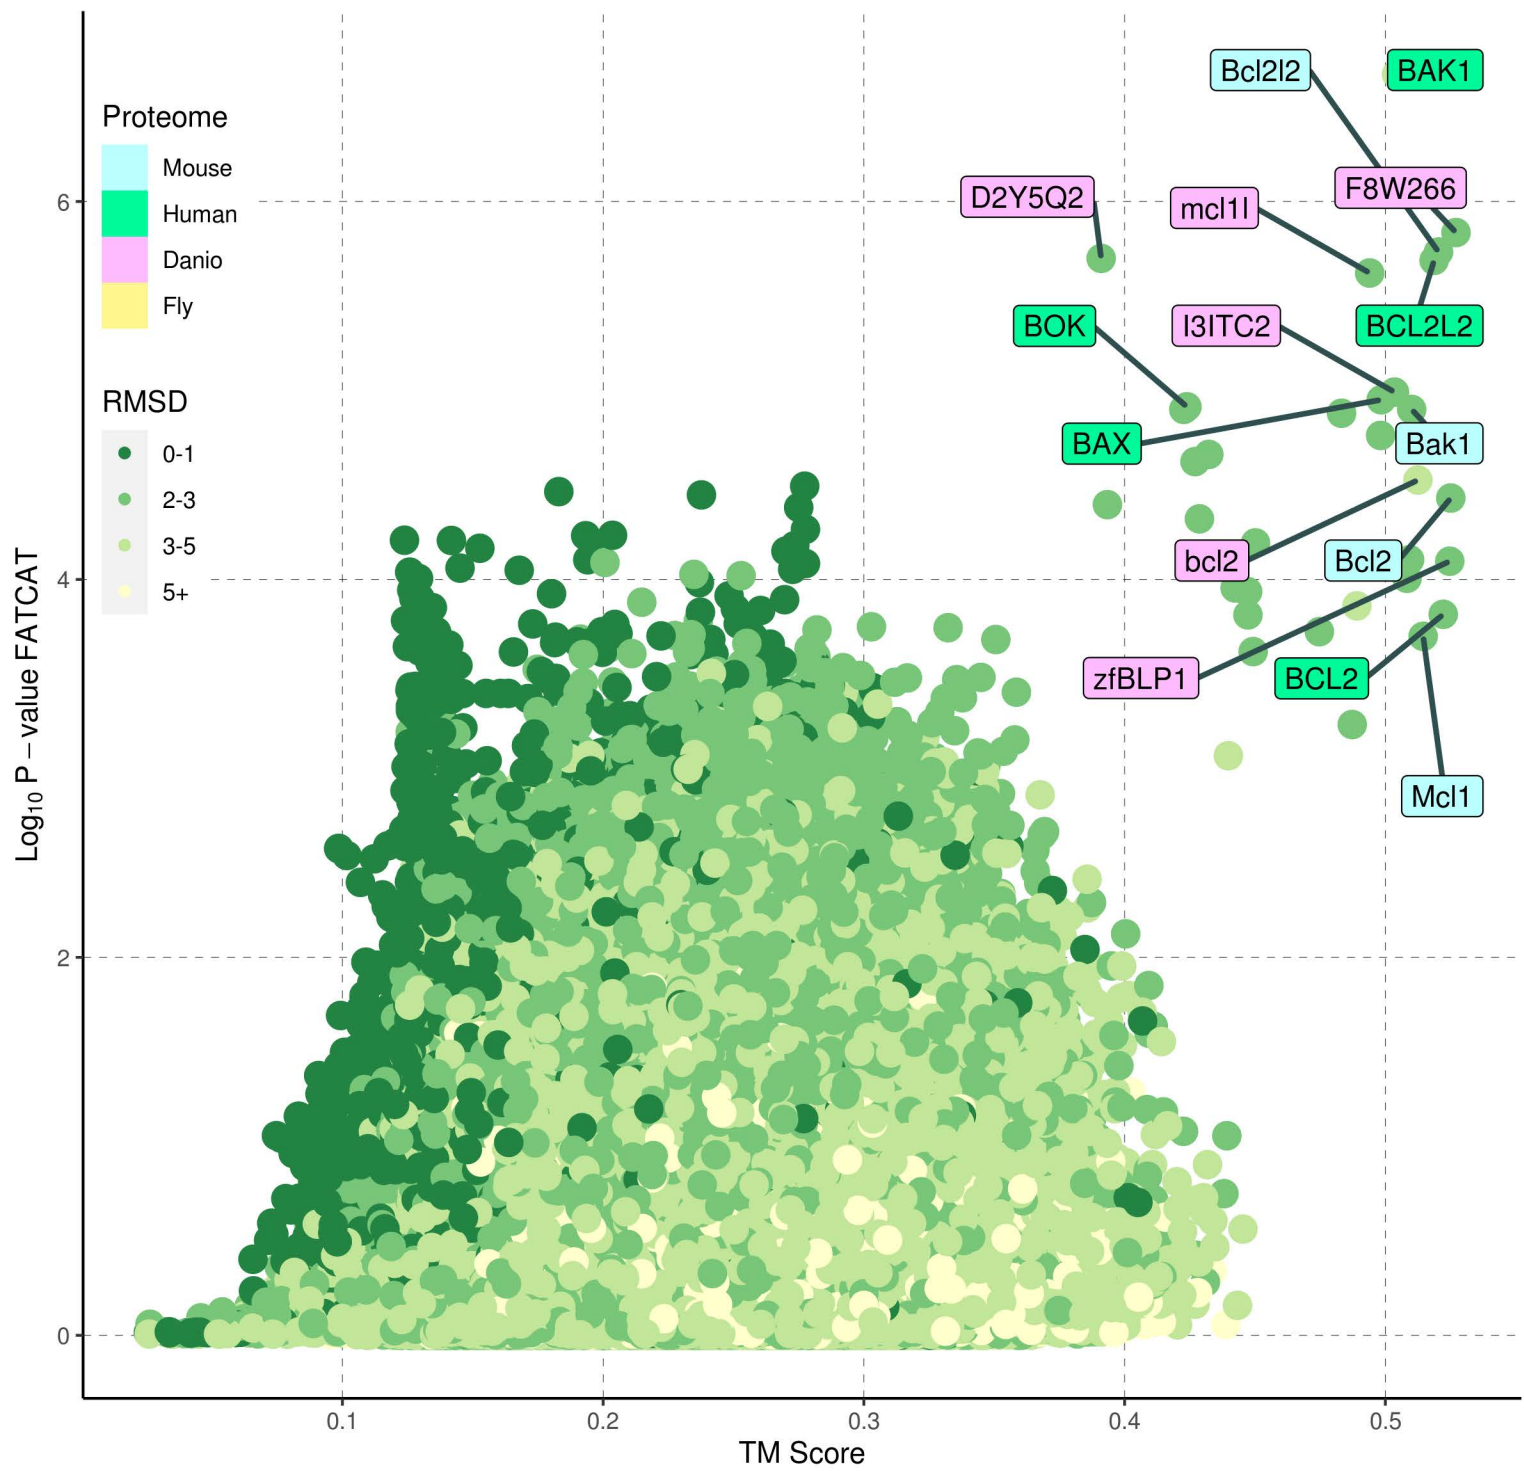

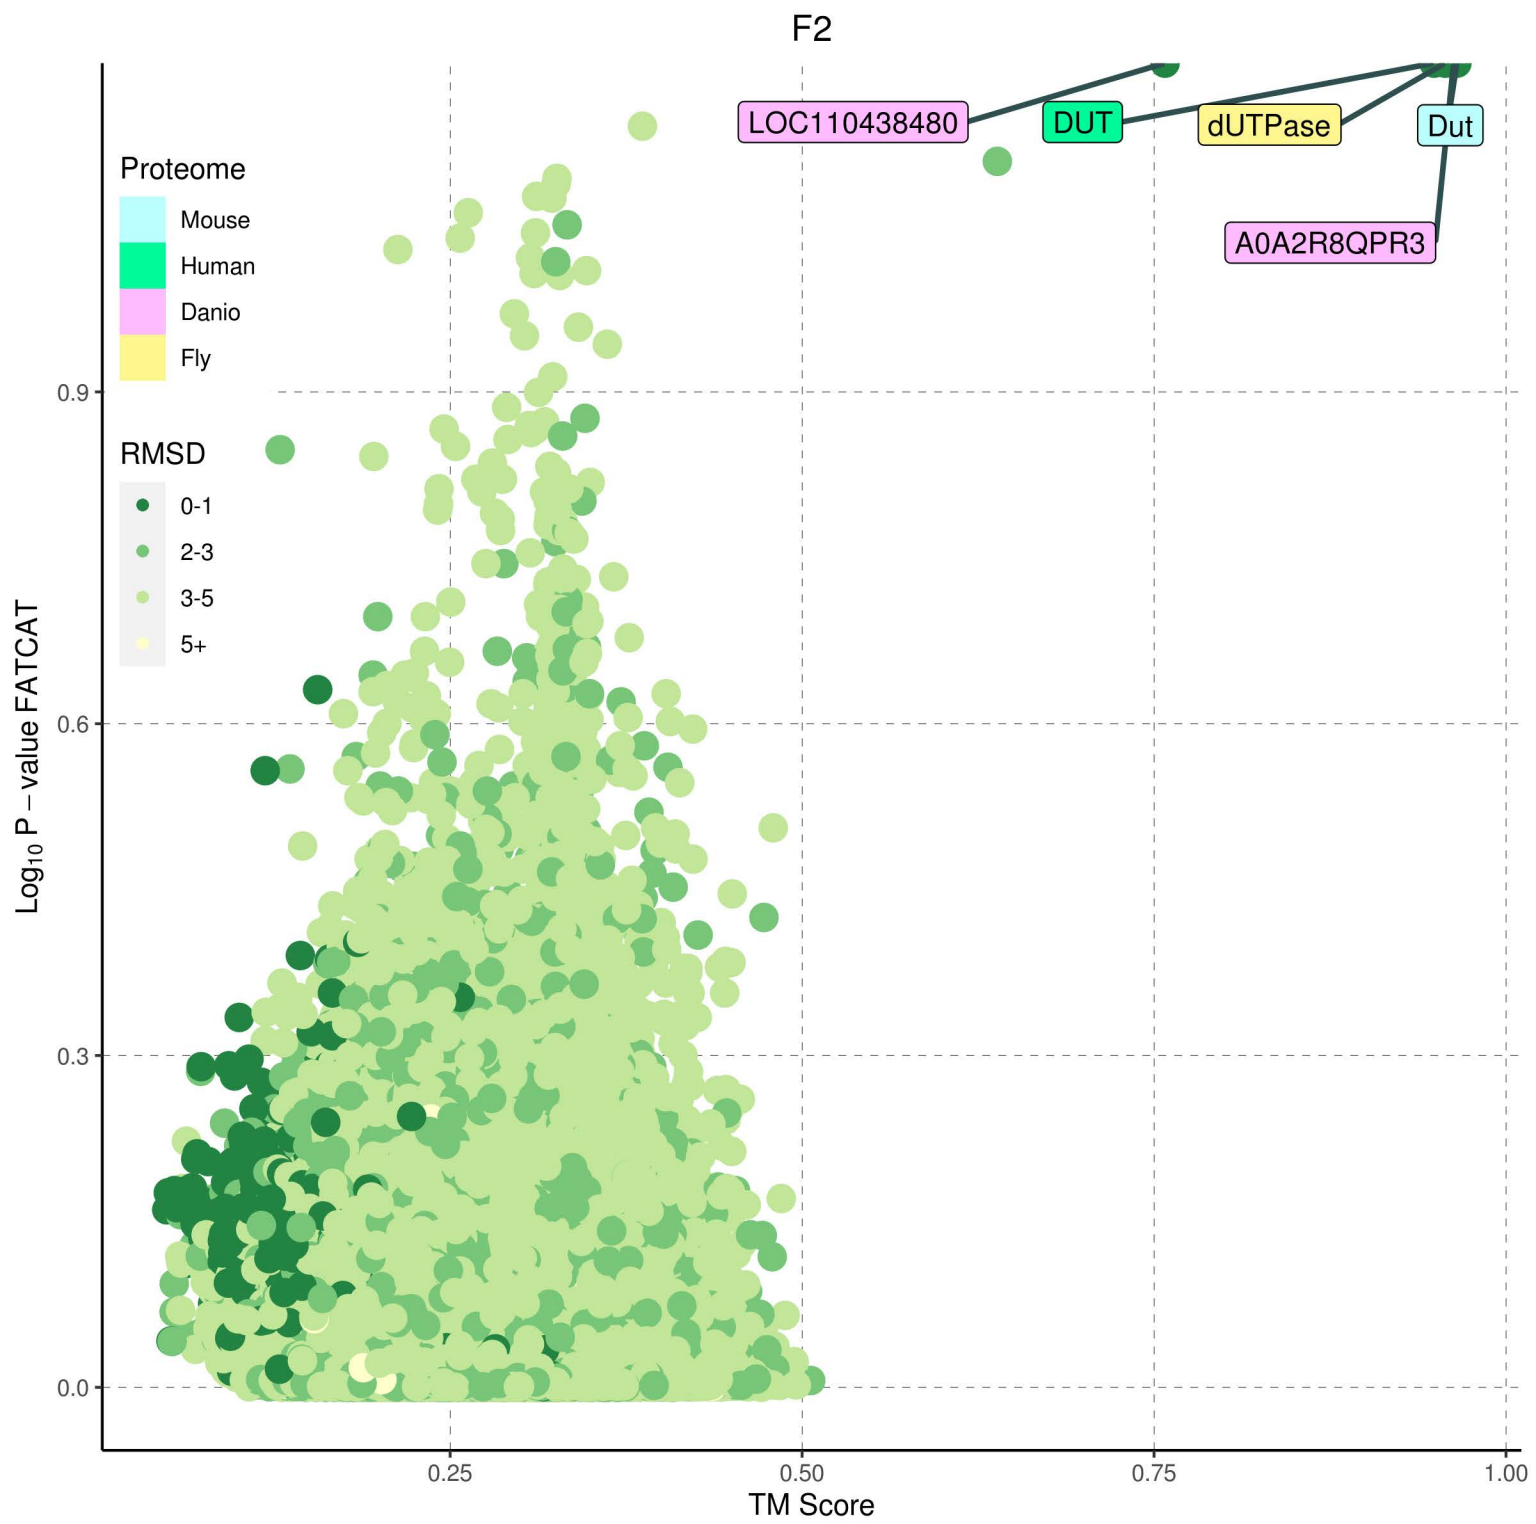

F3 : No hits, top-scoring values are indicated

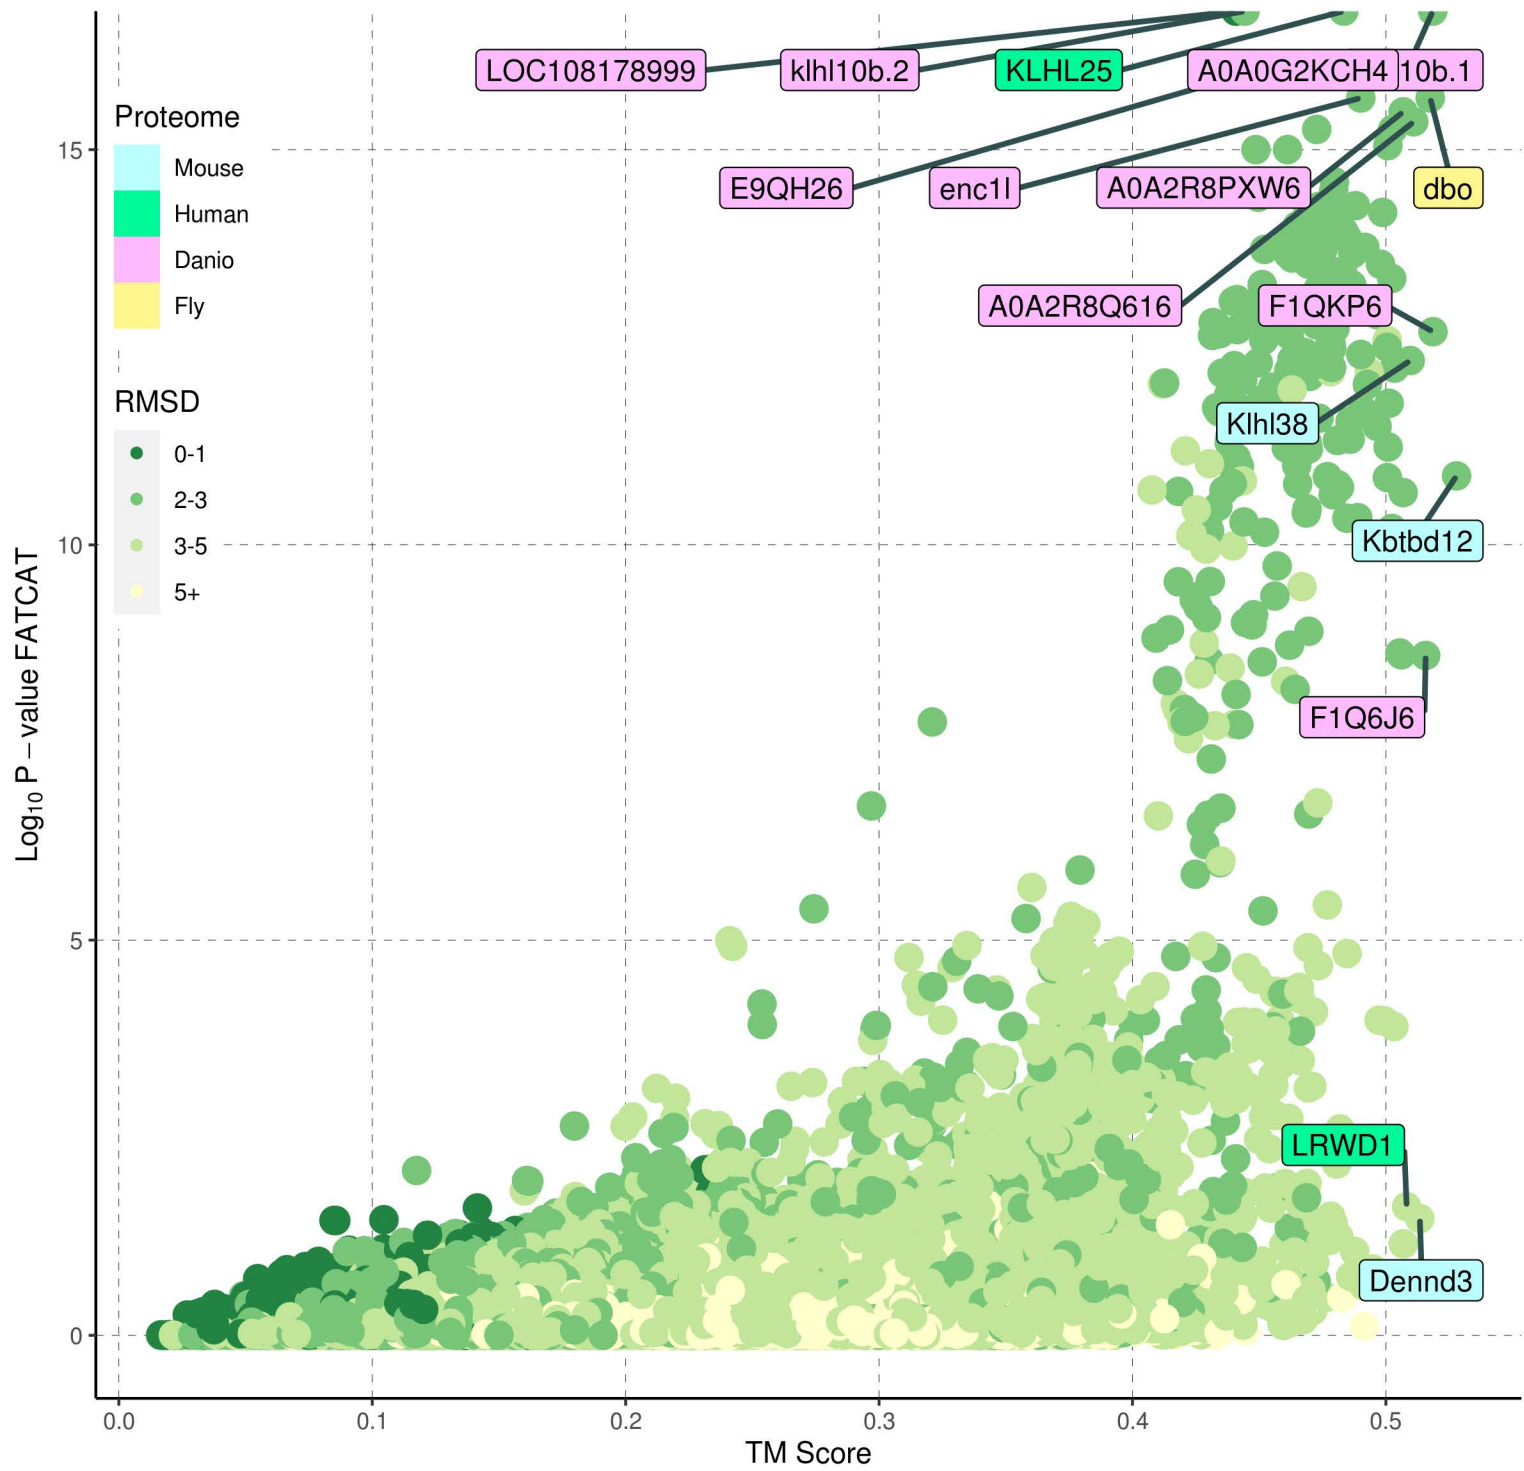

F4

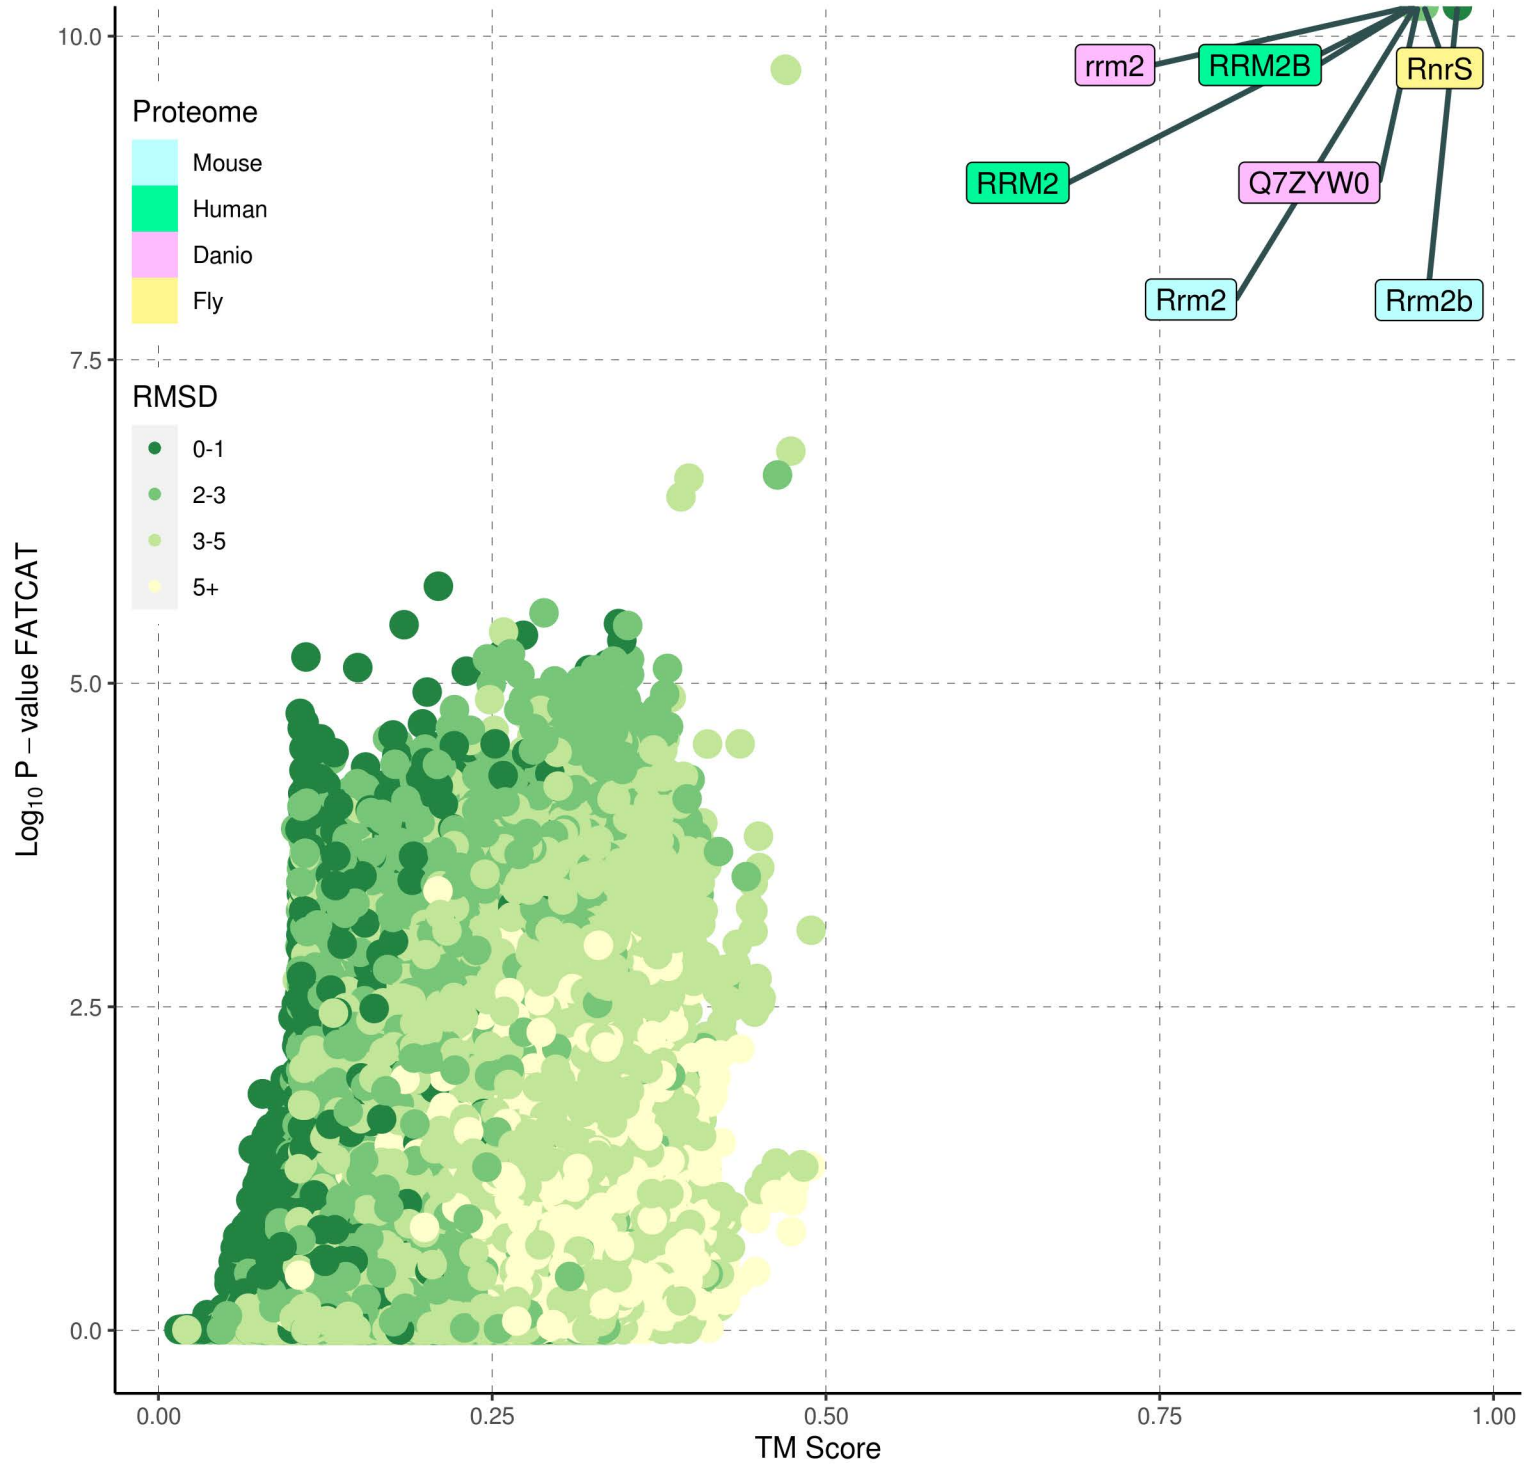



F5 : No hits, top-scoring values are indicated

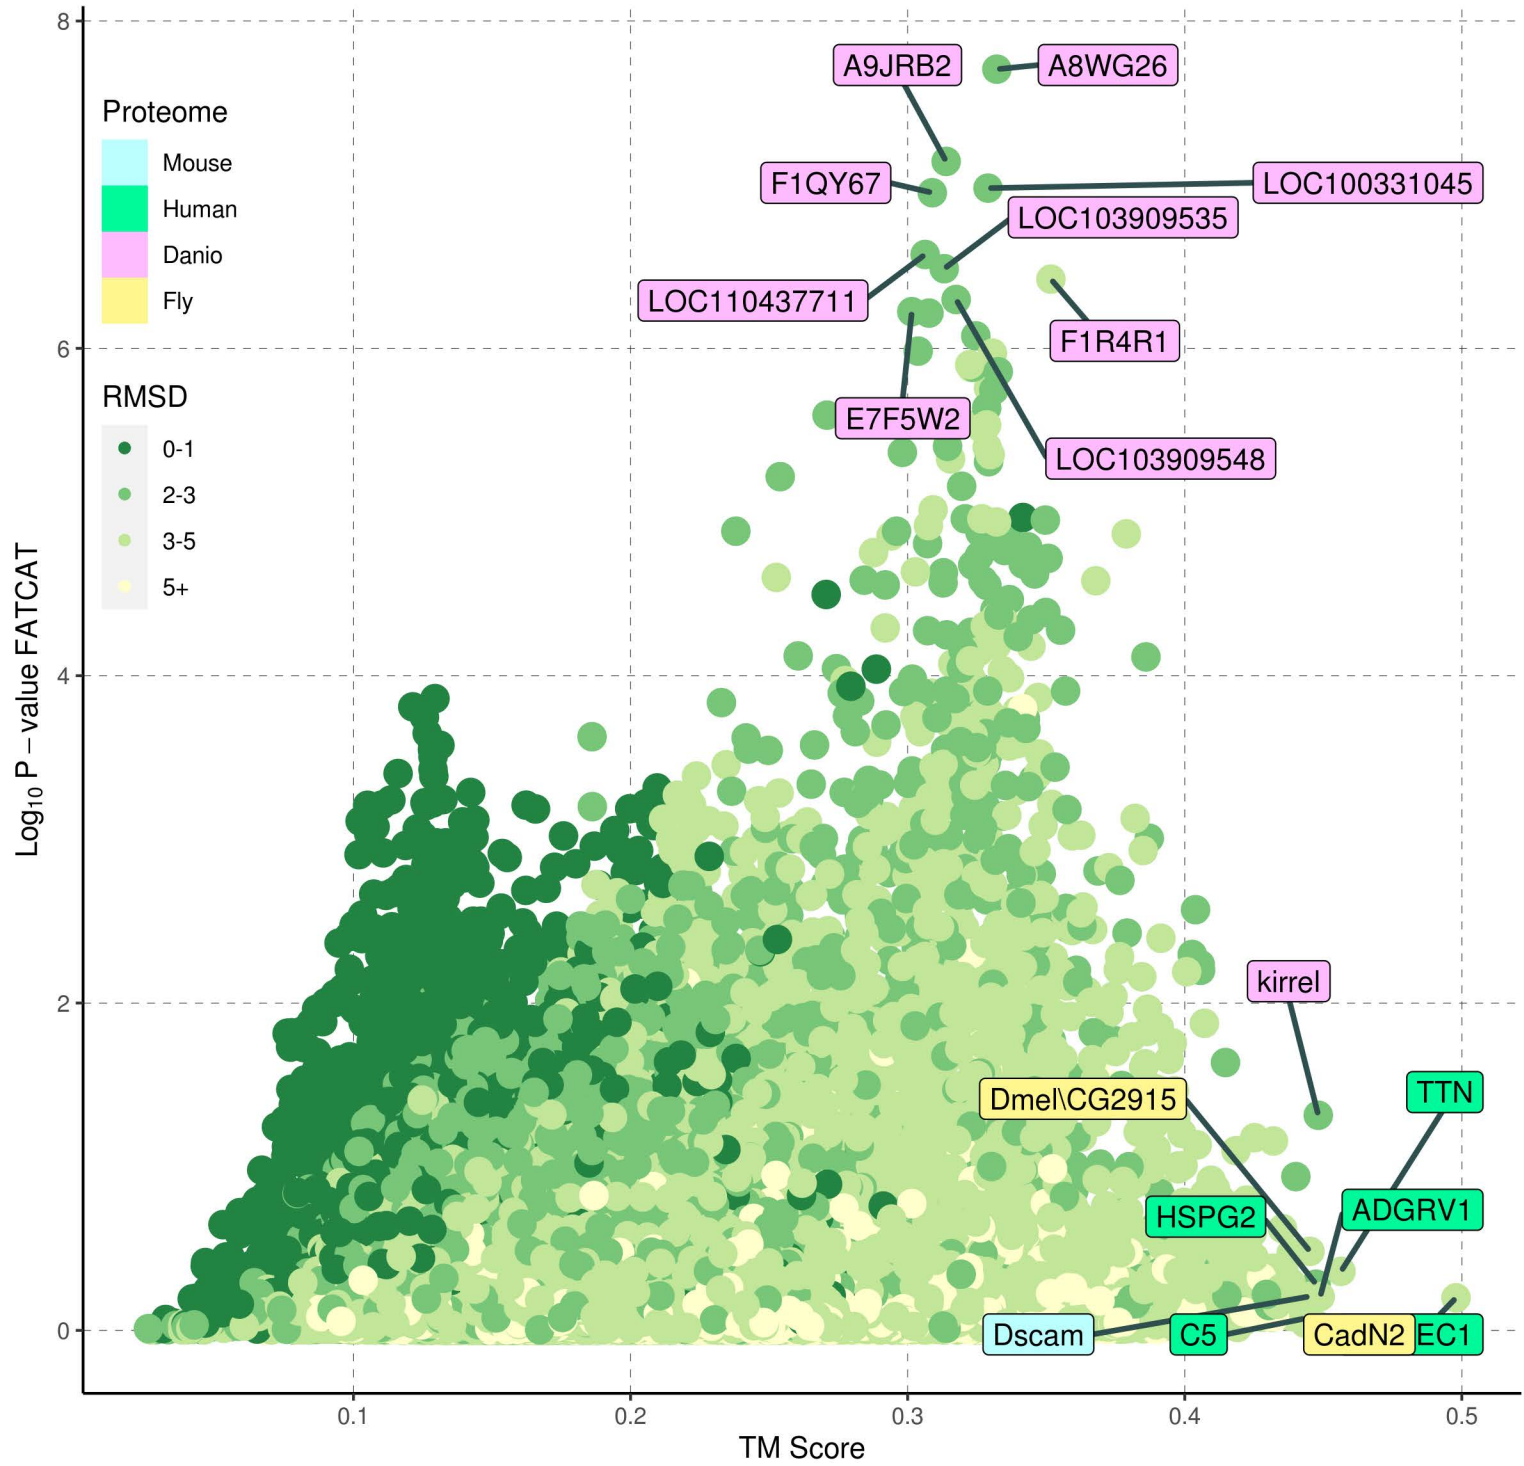

# F6 : No hits, top-scoring values are indicated

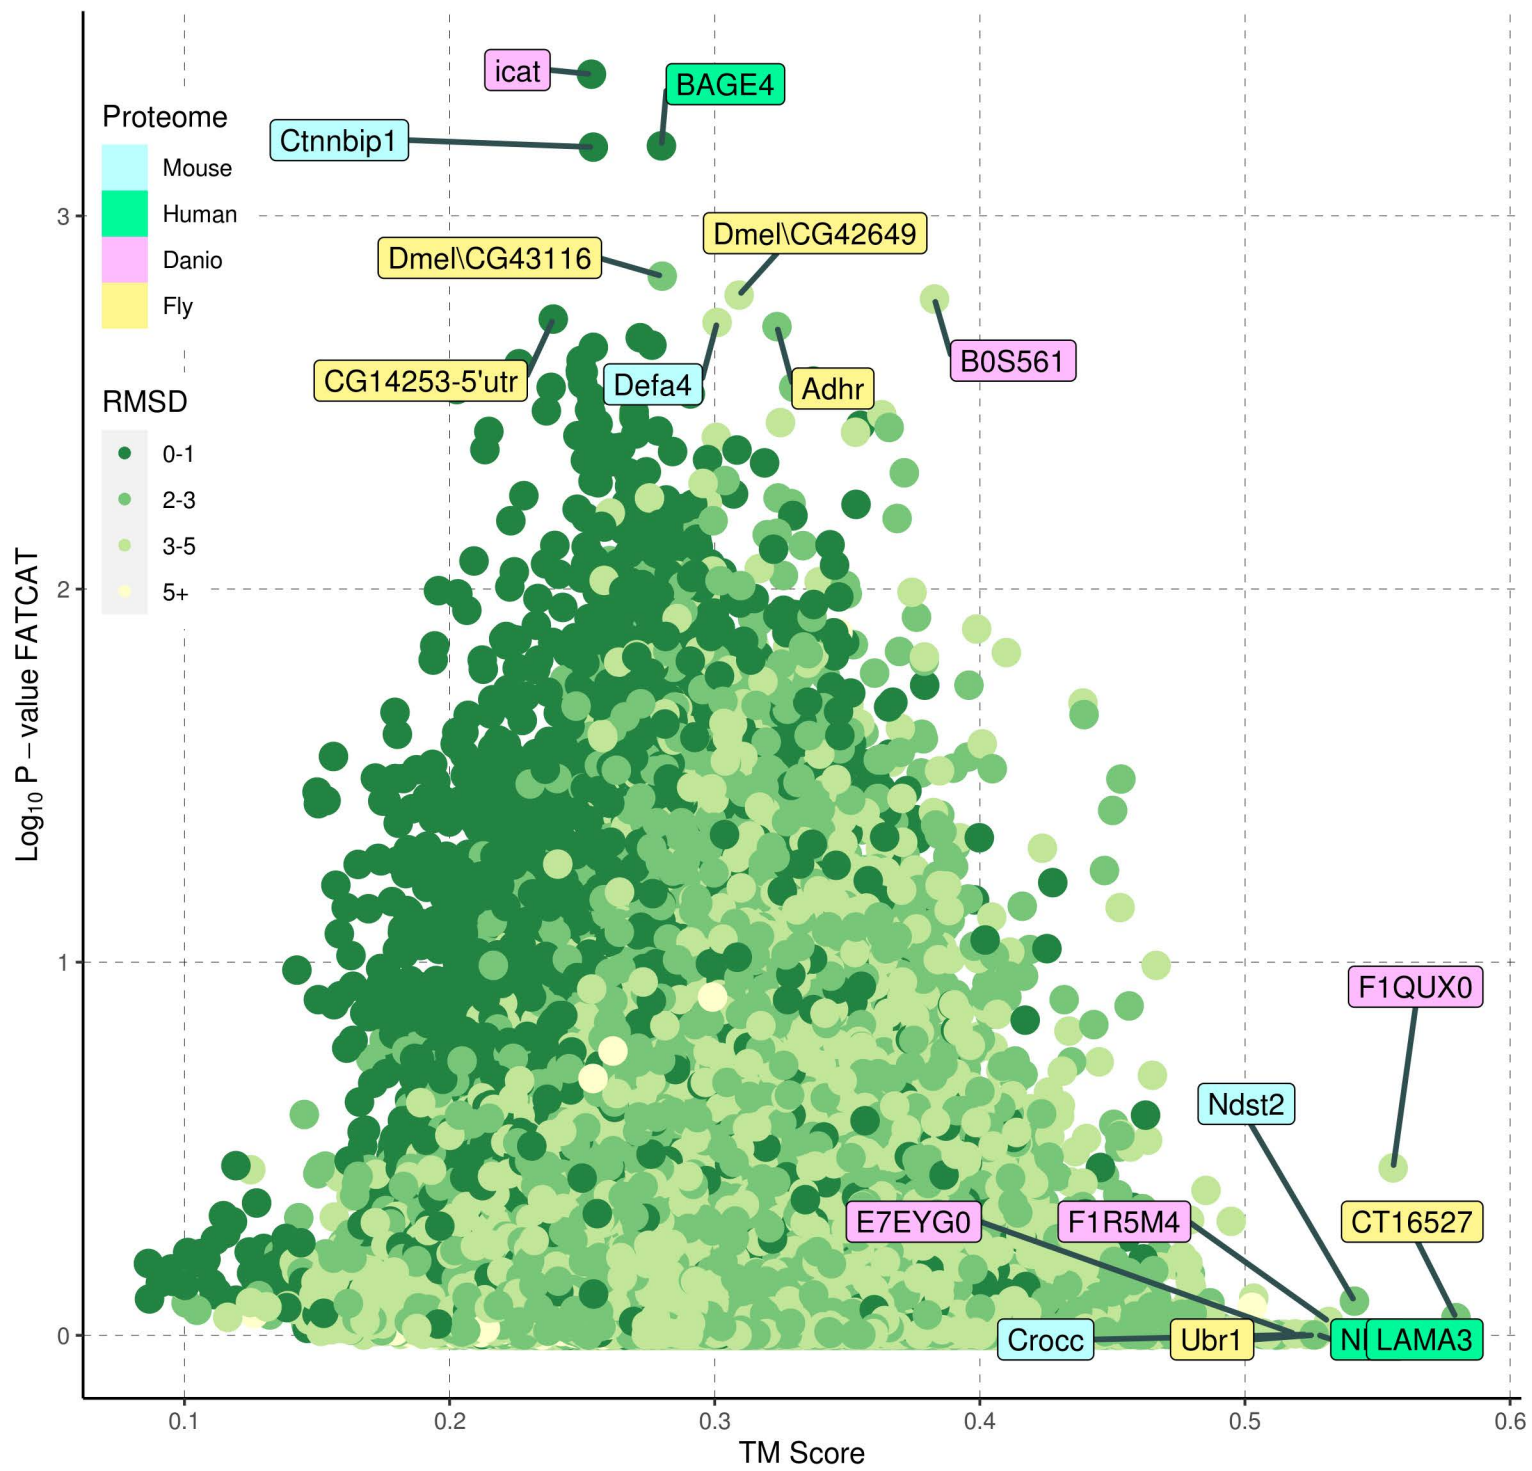

F7 : No hits, top-scoring values are indicated

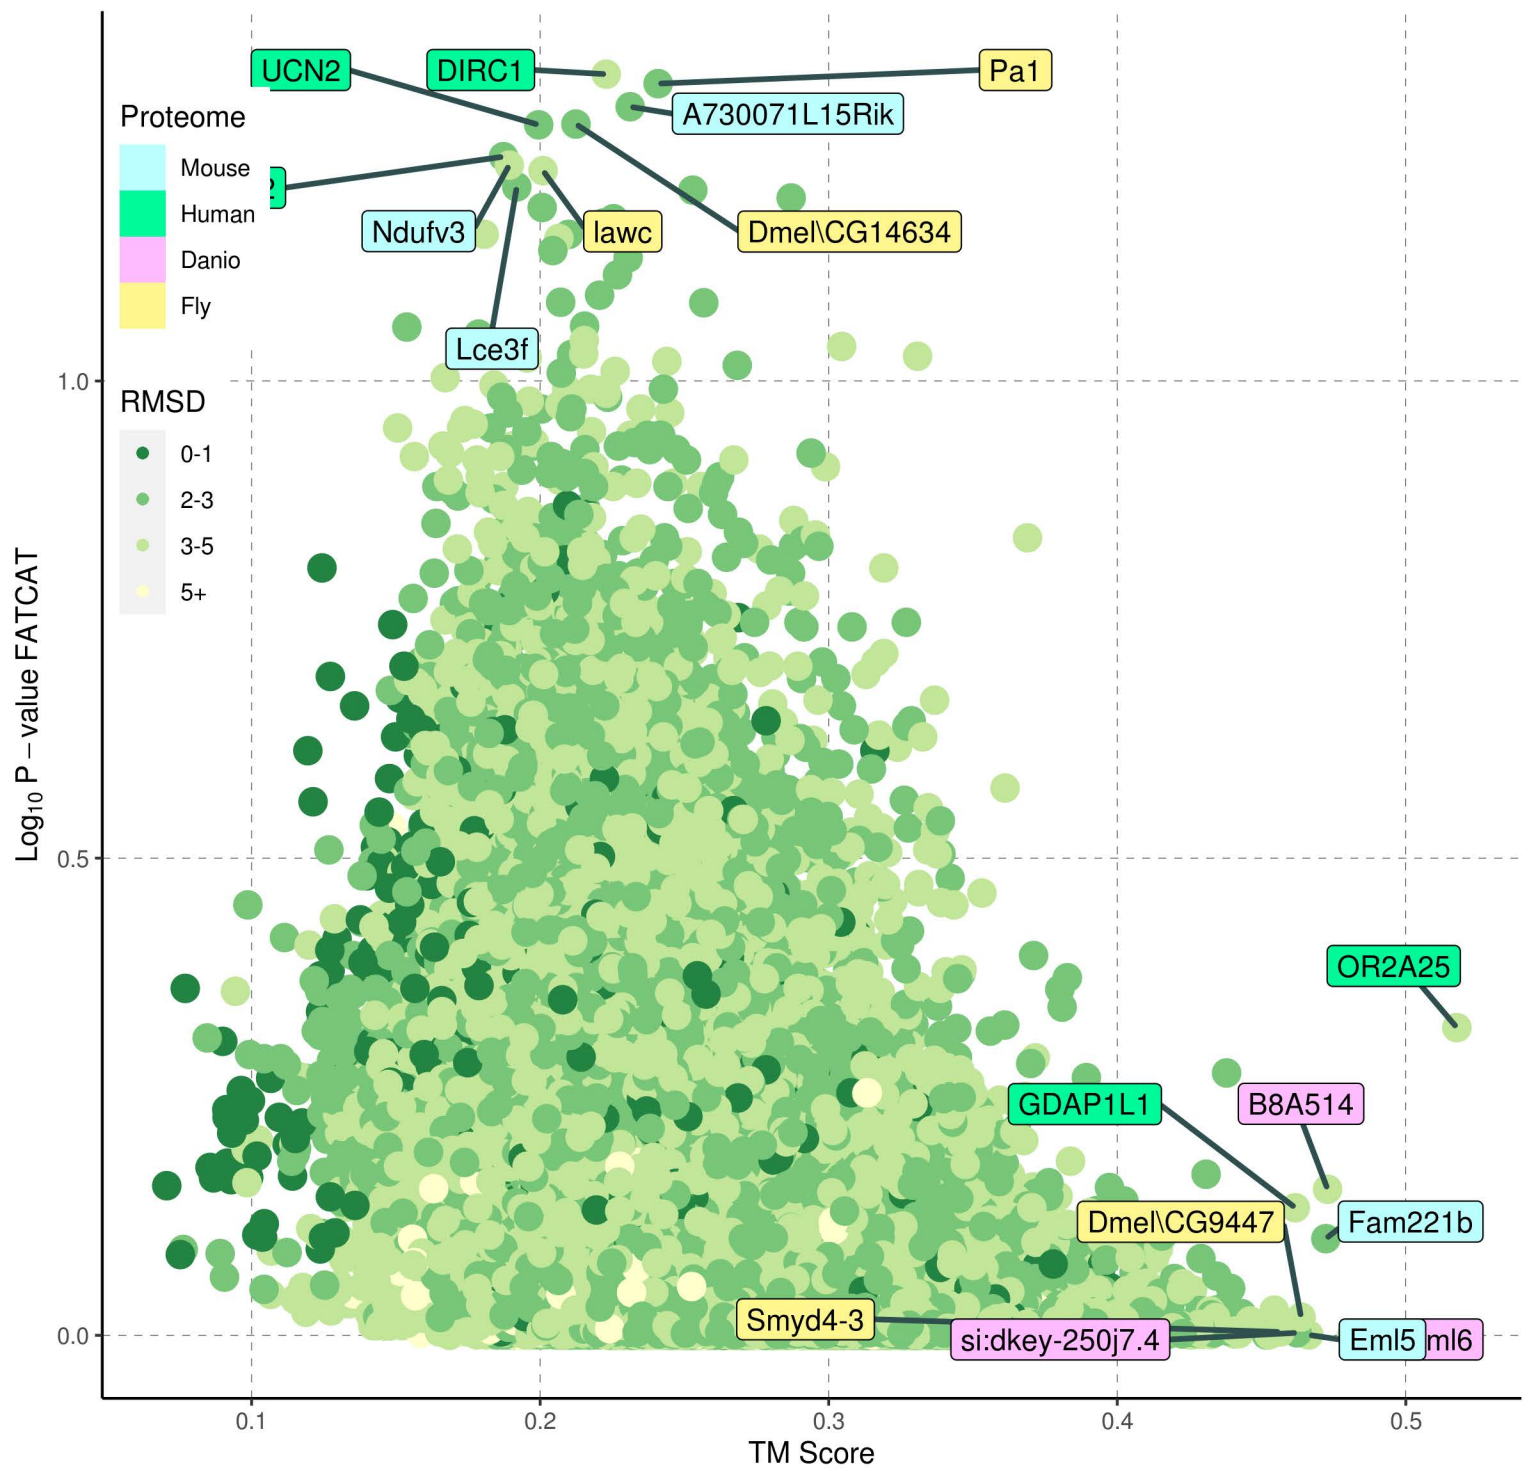

F8 : No hits, top-scoring values are indicated

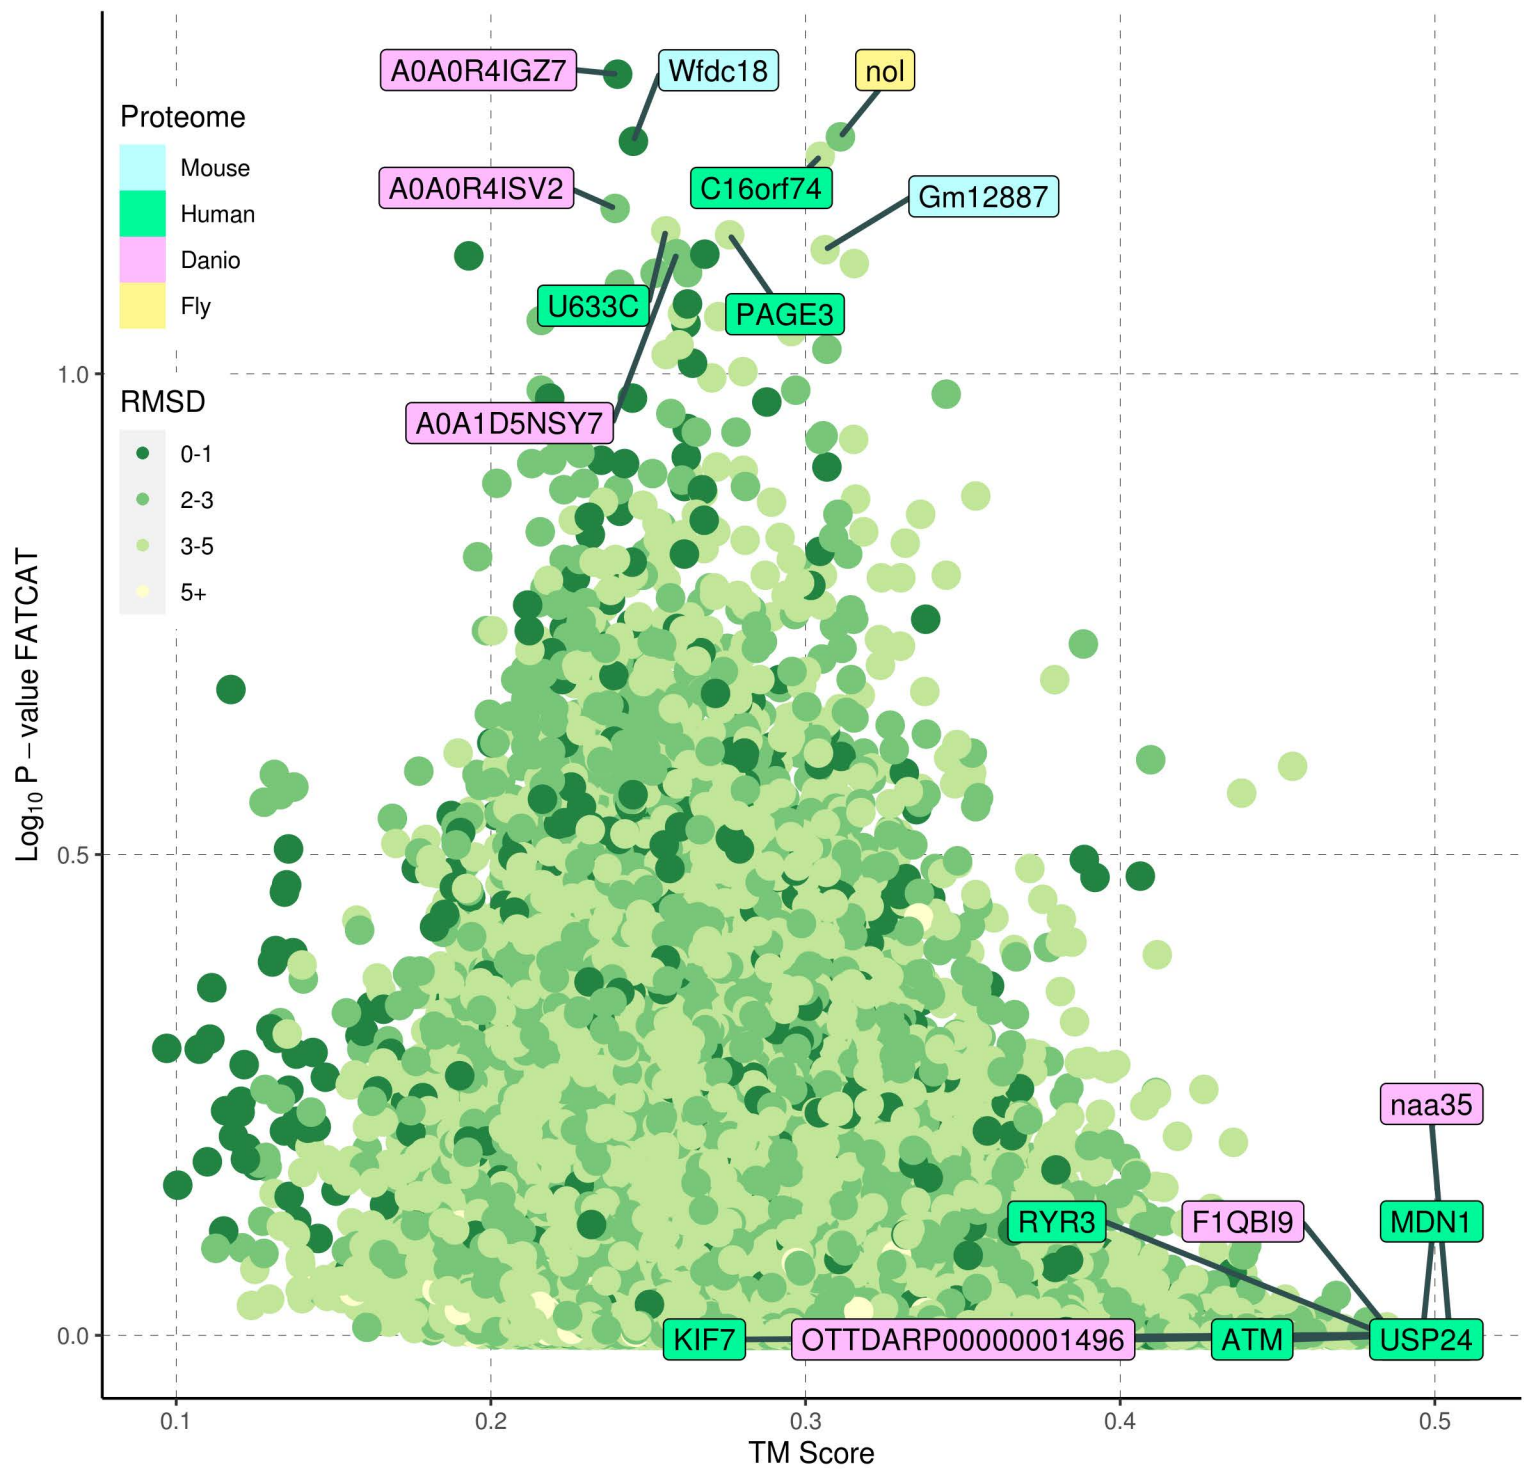

# F9 : No hits, top-scoring values are indicated

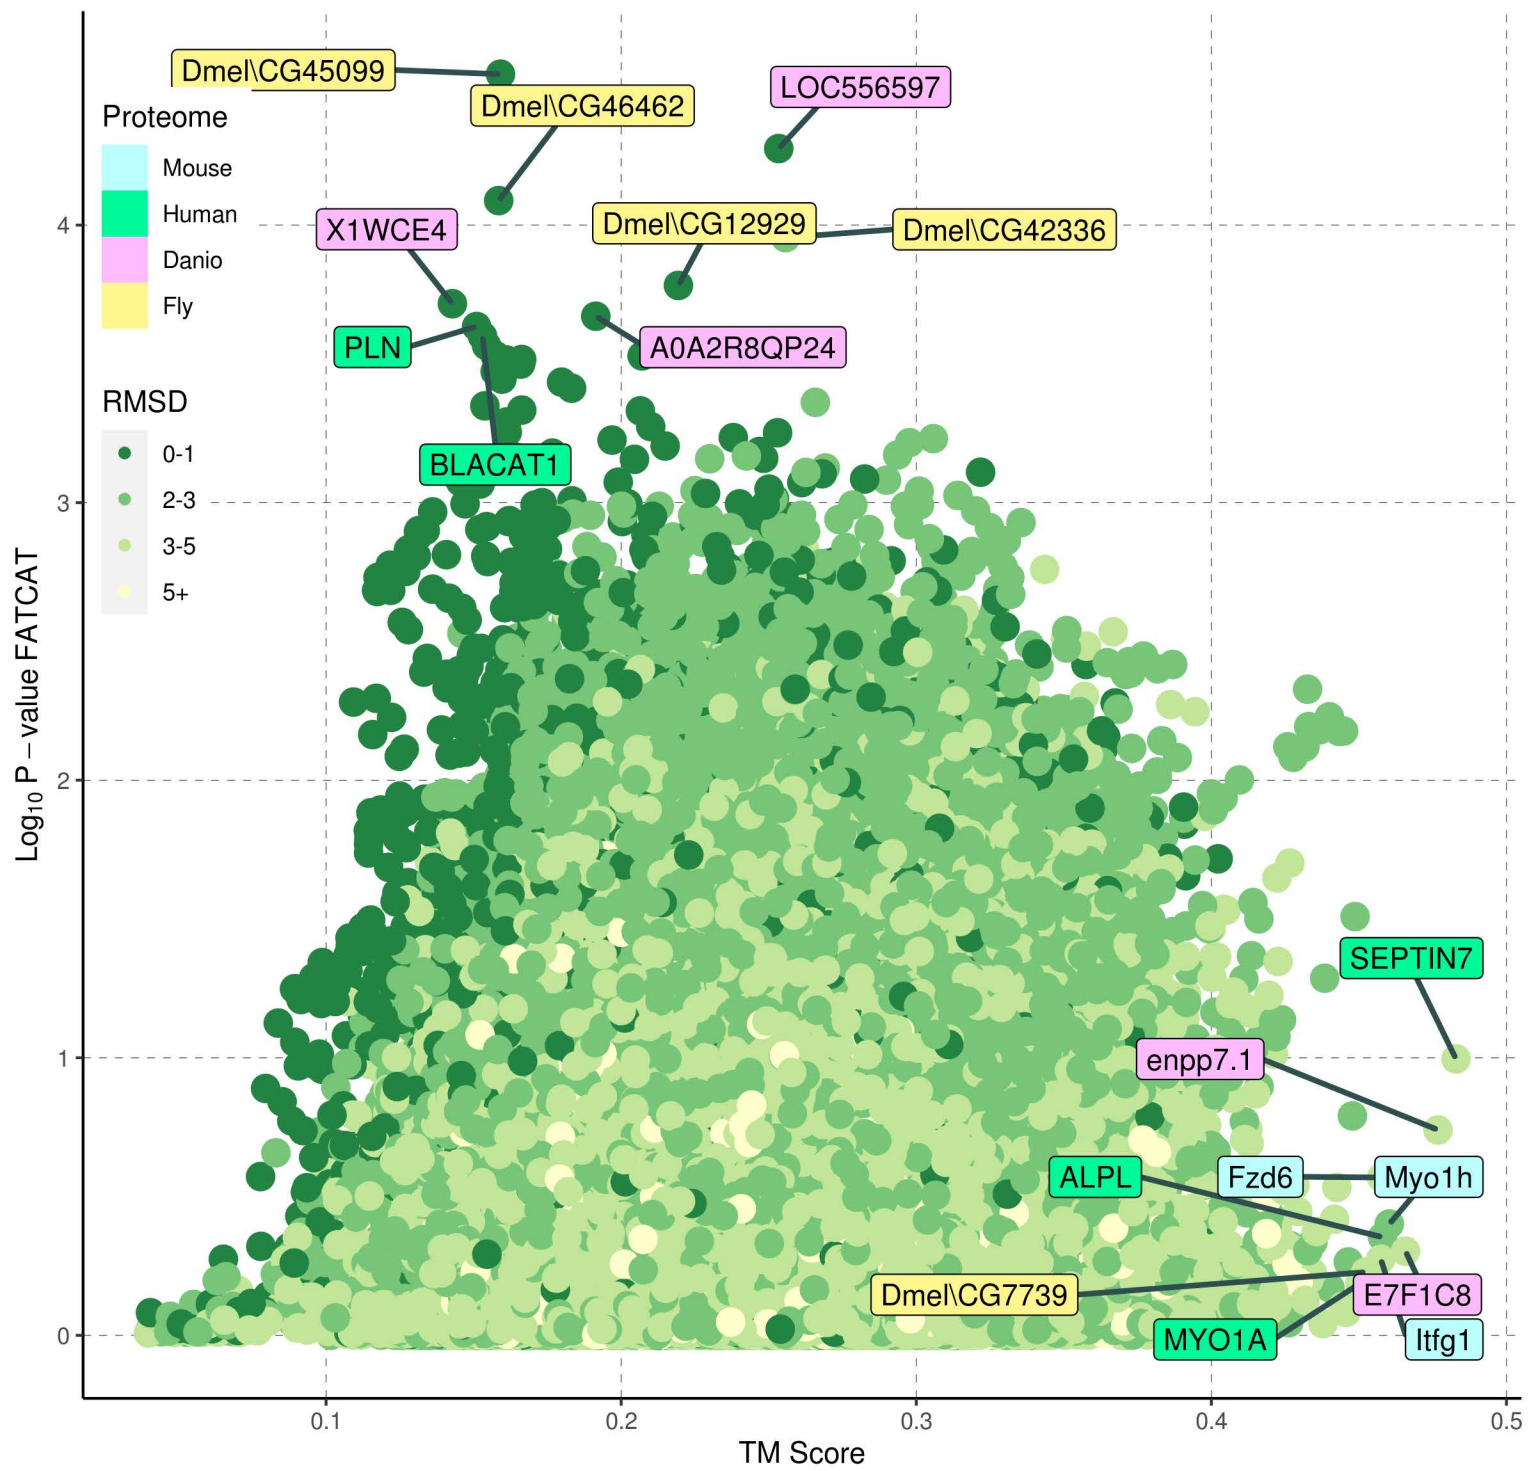

# F10 : No hits, top-scoring values are indicated

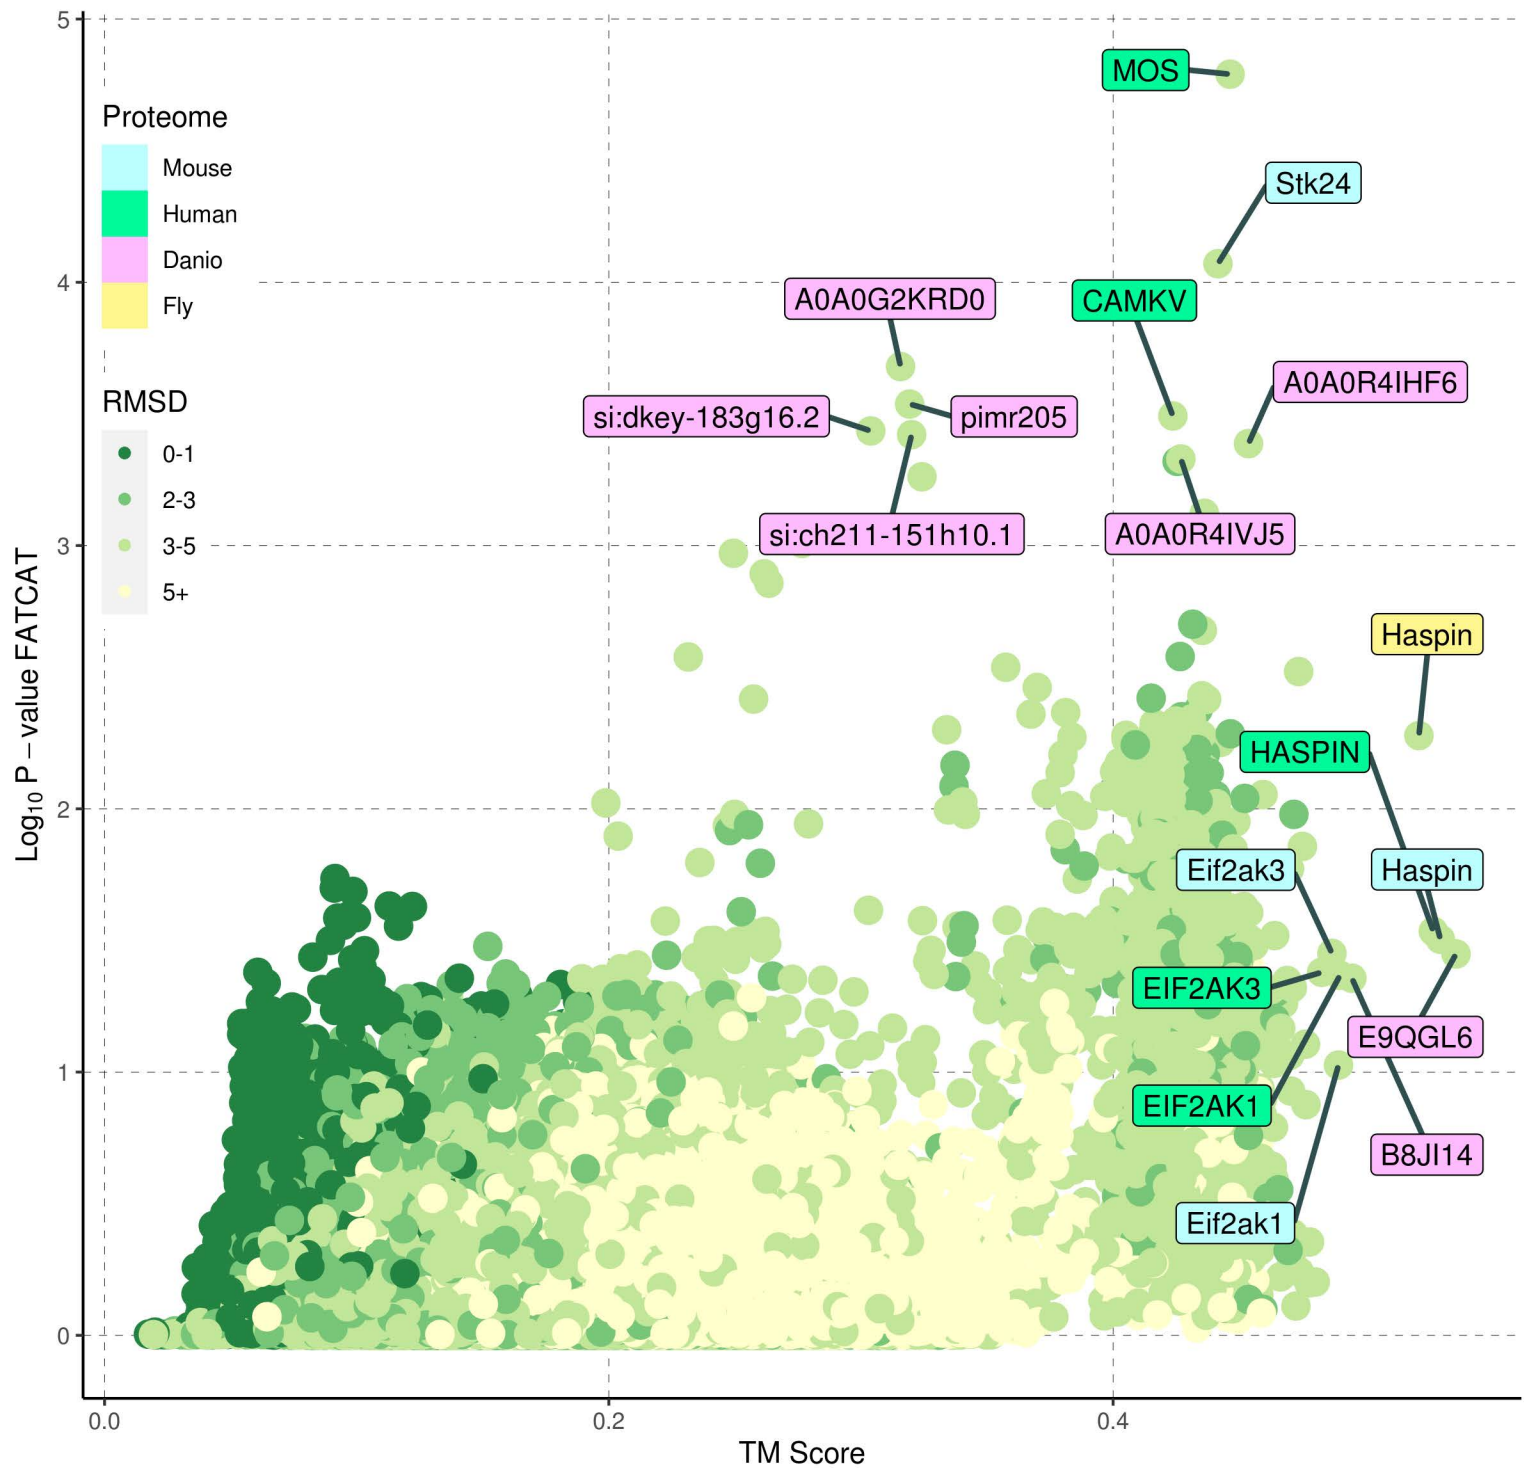

F11 : No hits, top-scoring values are indicated

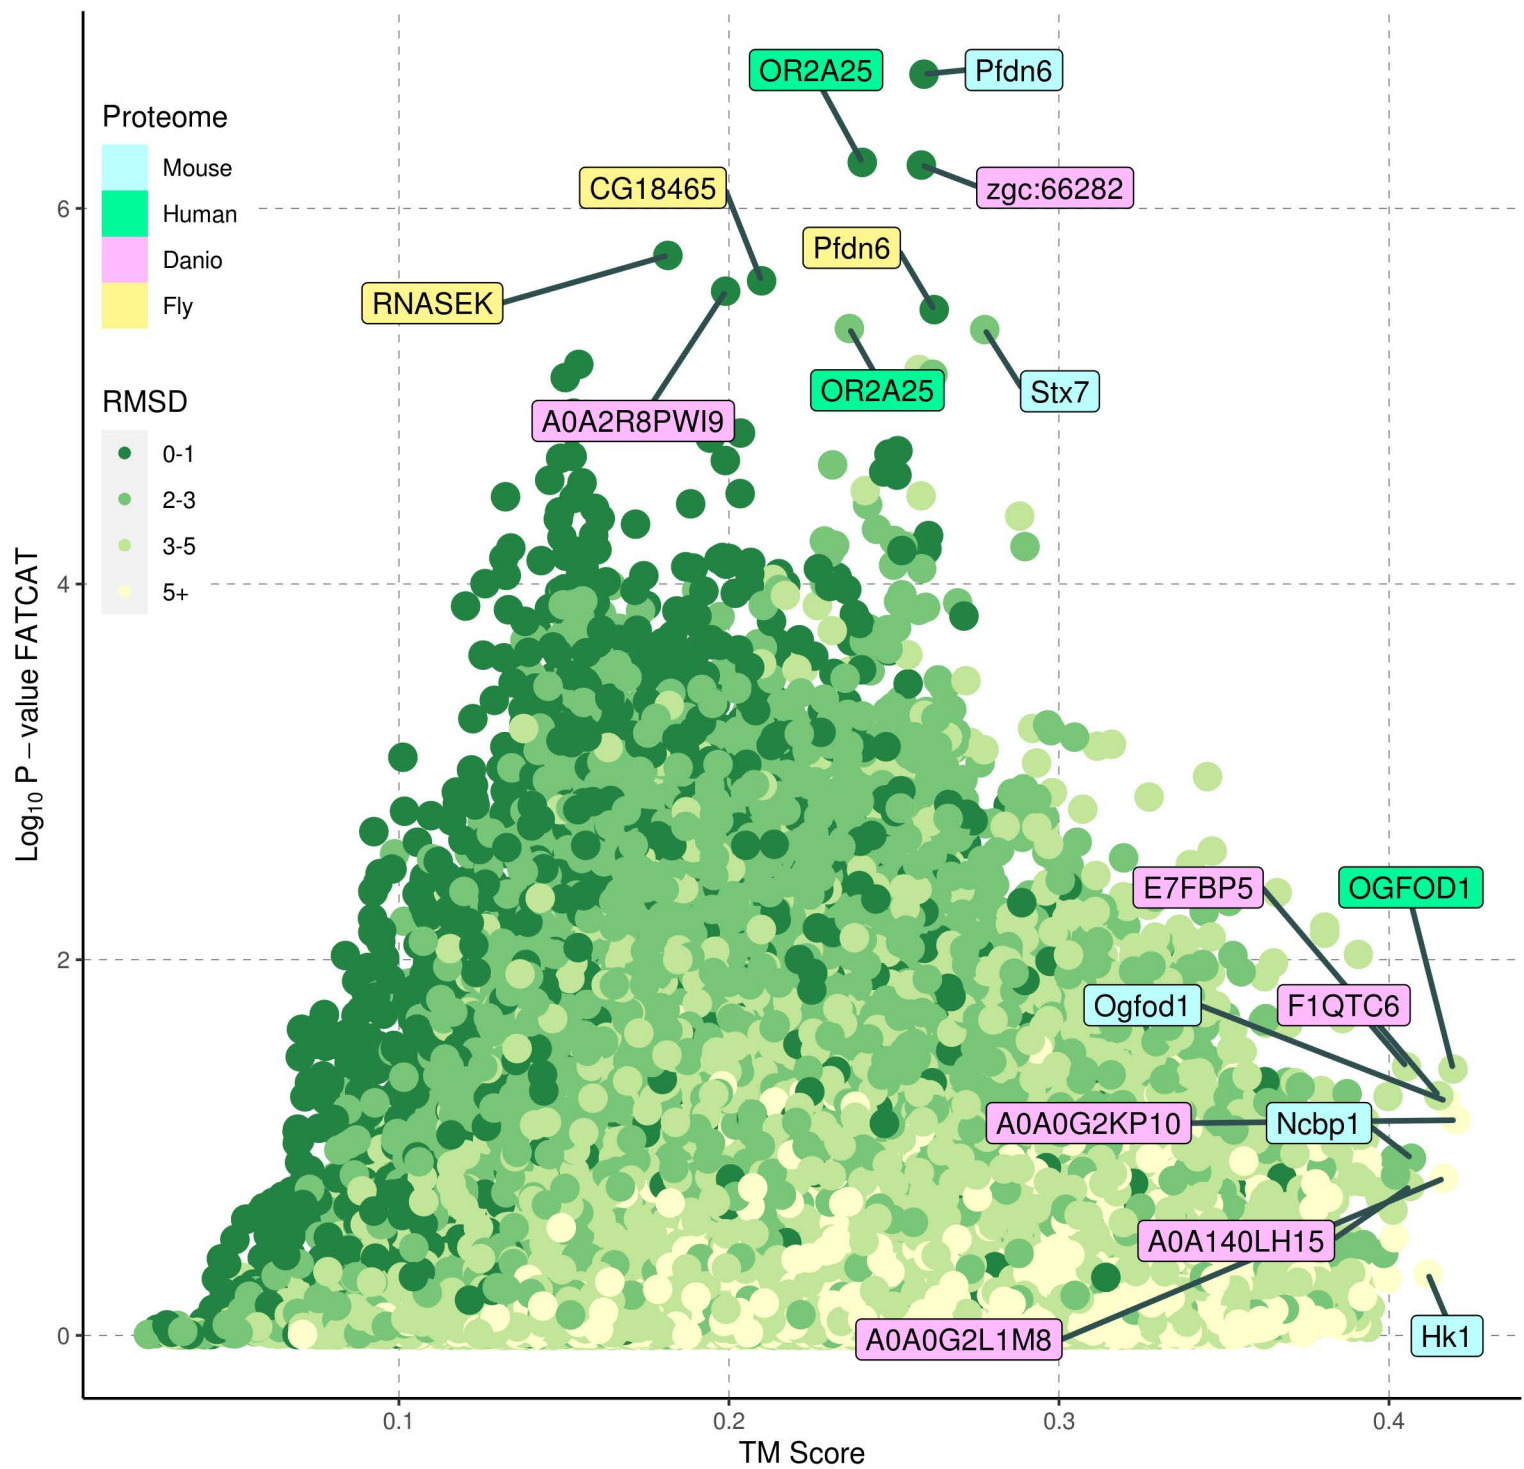

# F12 : No hits, top-scoring values are indicated

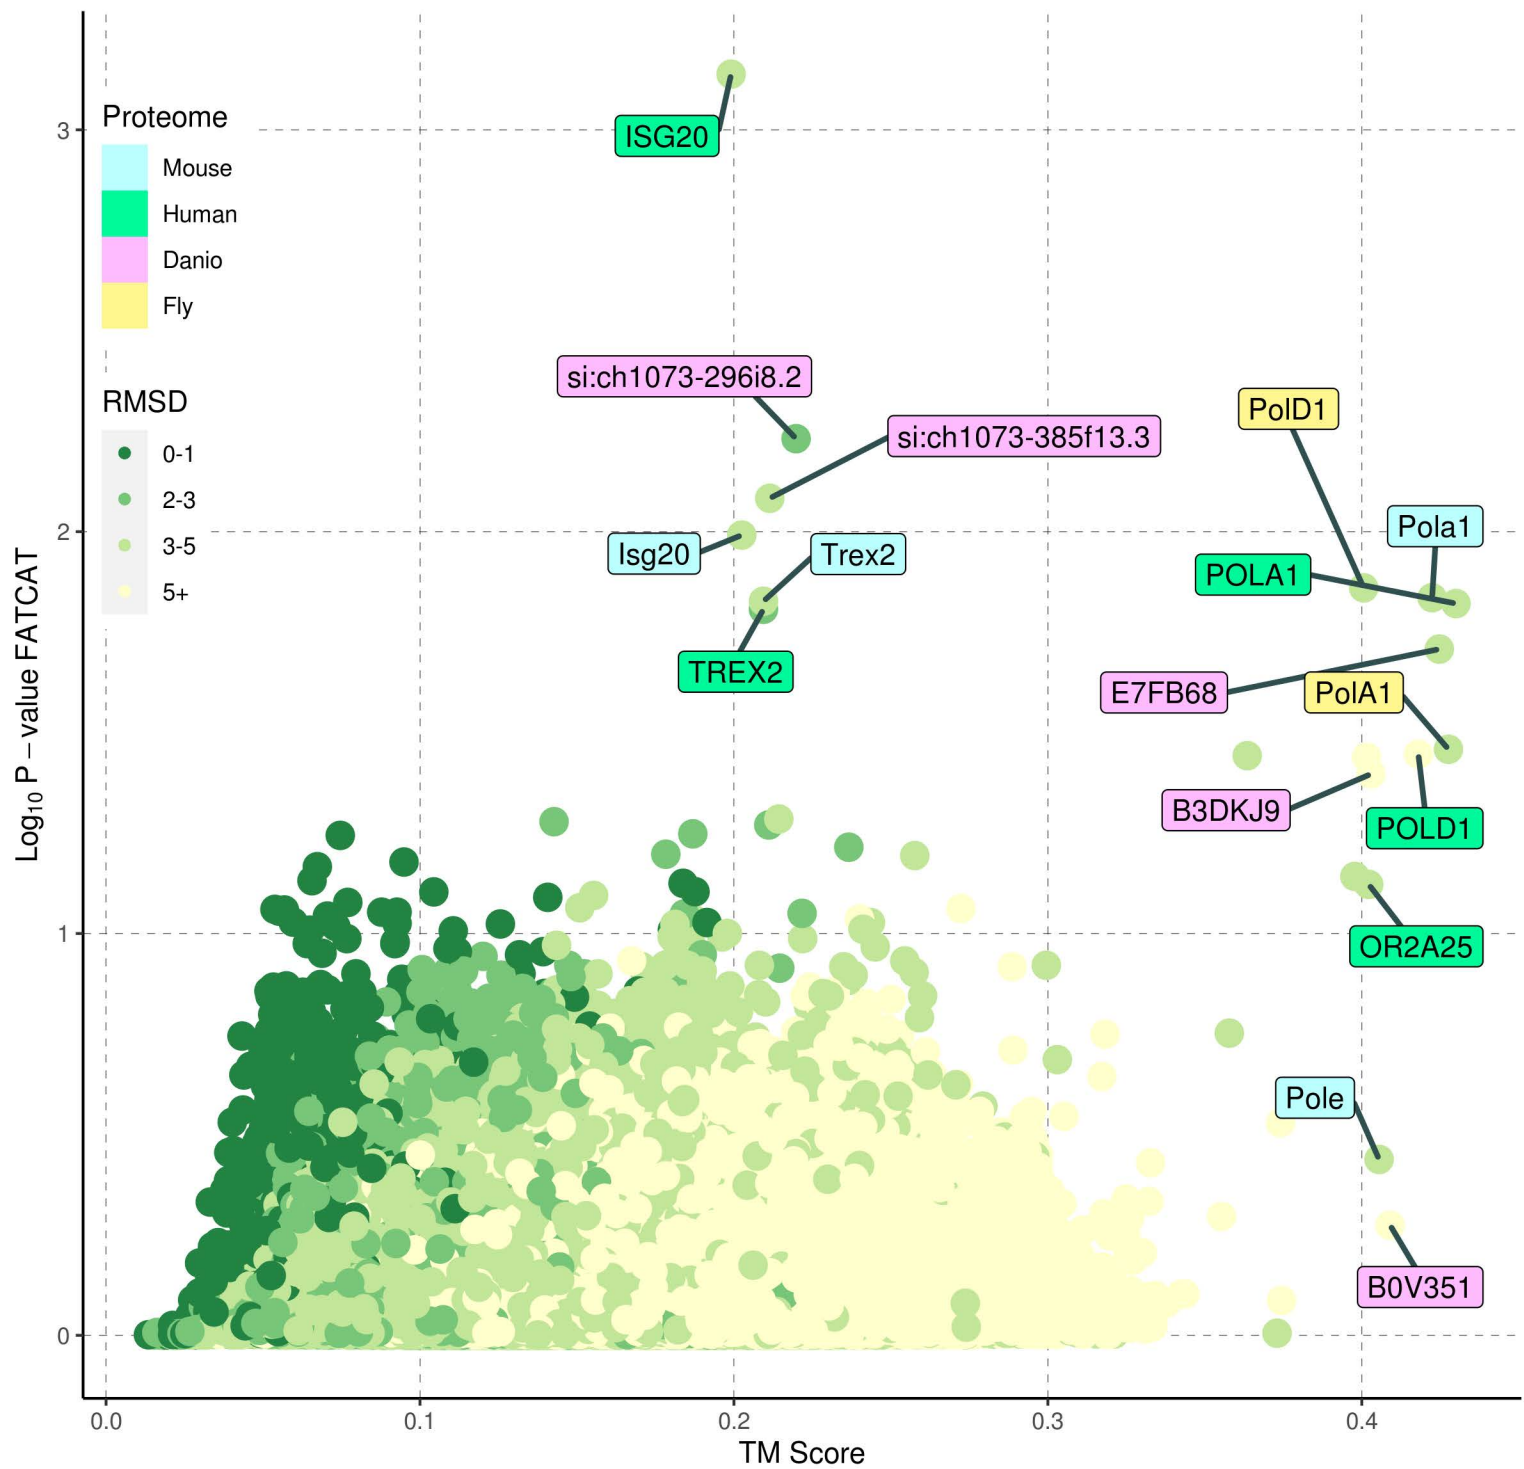



F13

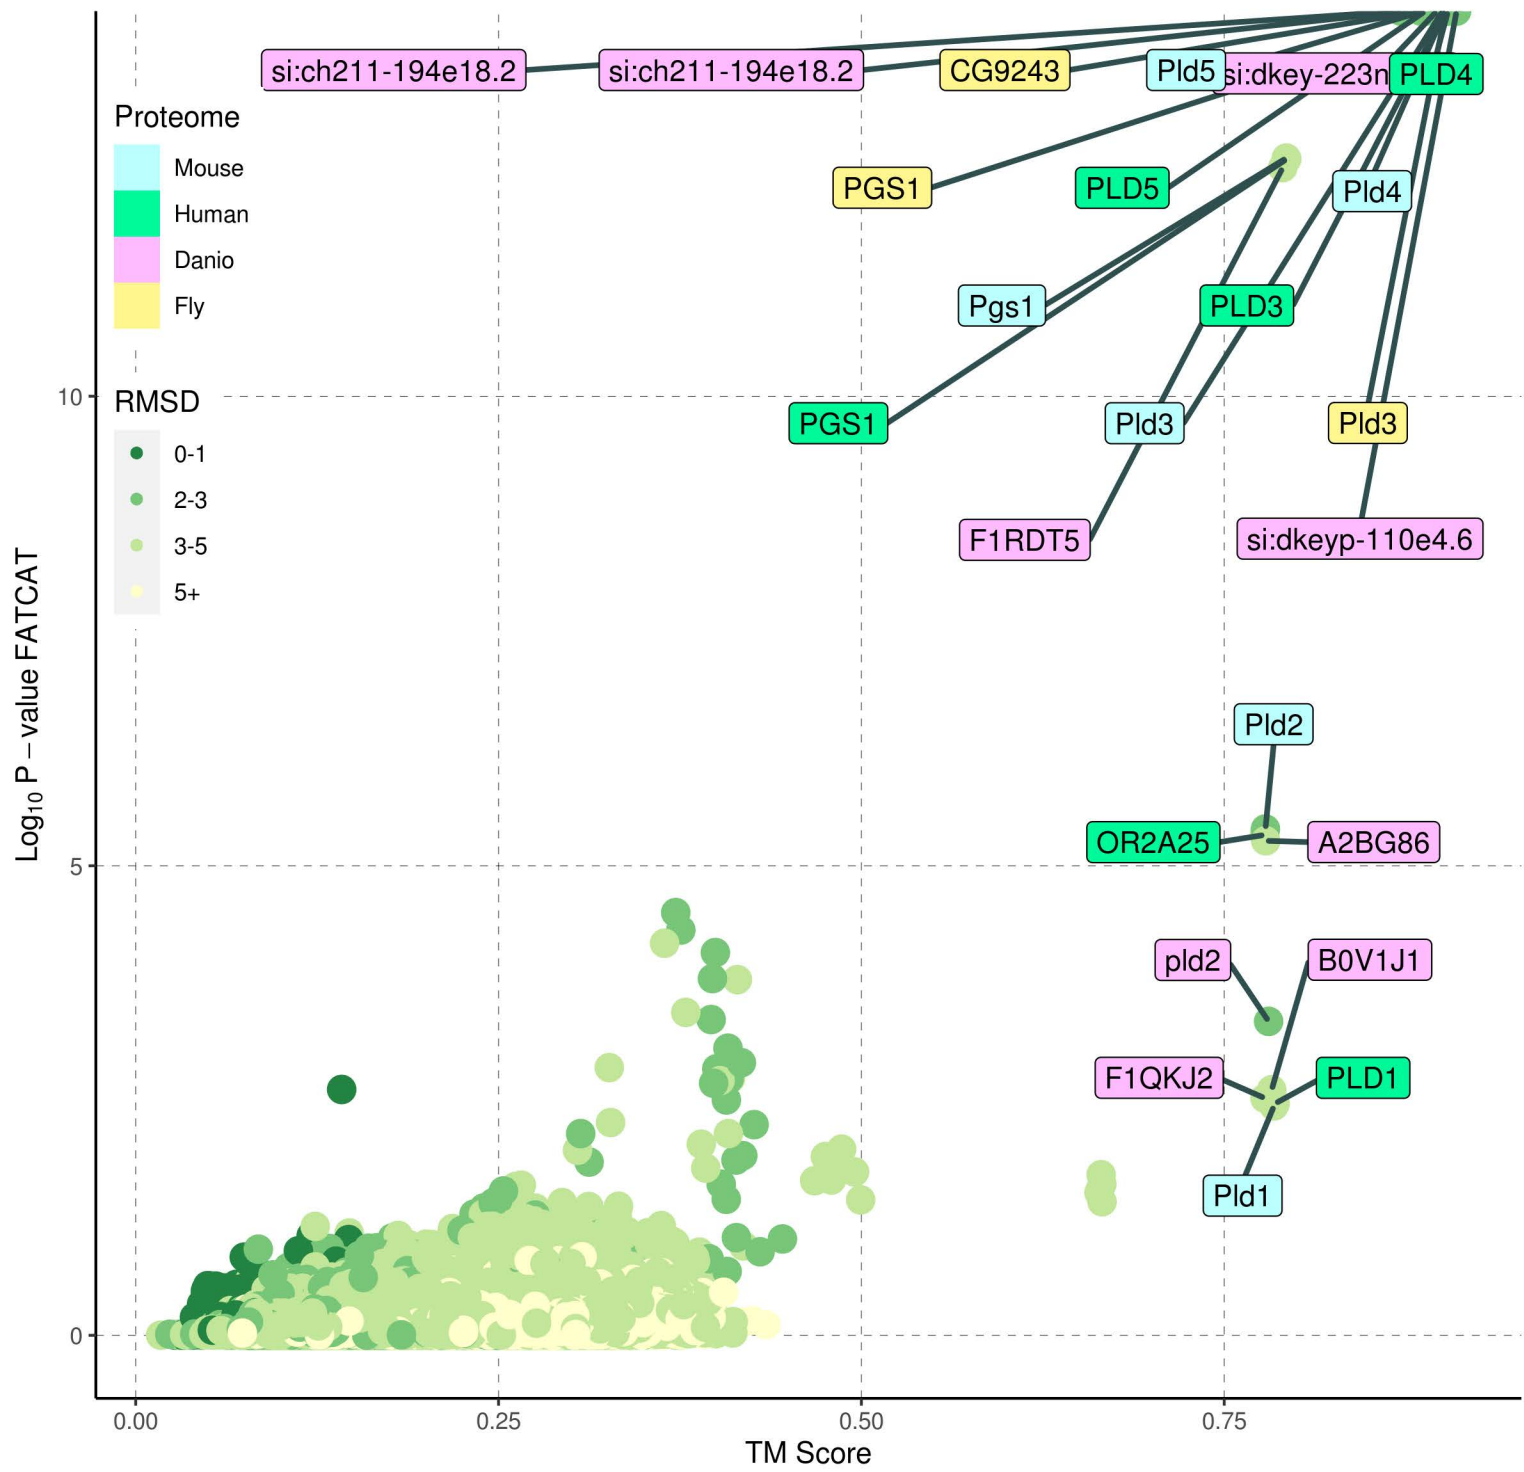

Proteome

- Mouse
- Human
- Danio
- Fly

RMSD

- 0-1
- 2-3
- 3-5
- 5+

$\text{Log}_{10}$  P-value FATCAT

TM Score

F14 : No hits, top-scoring values are indicated

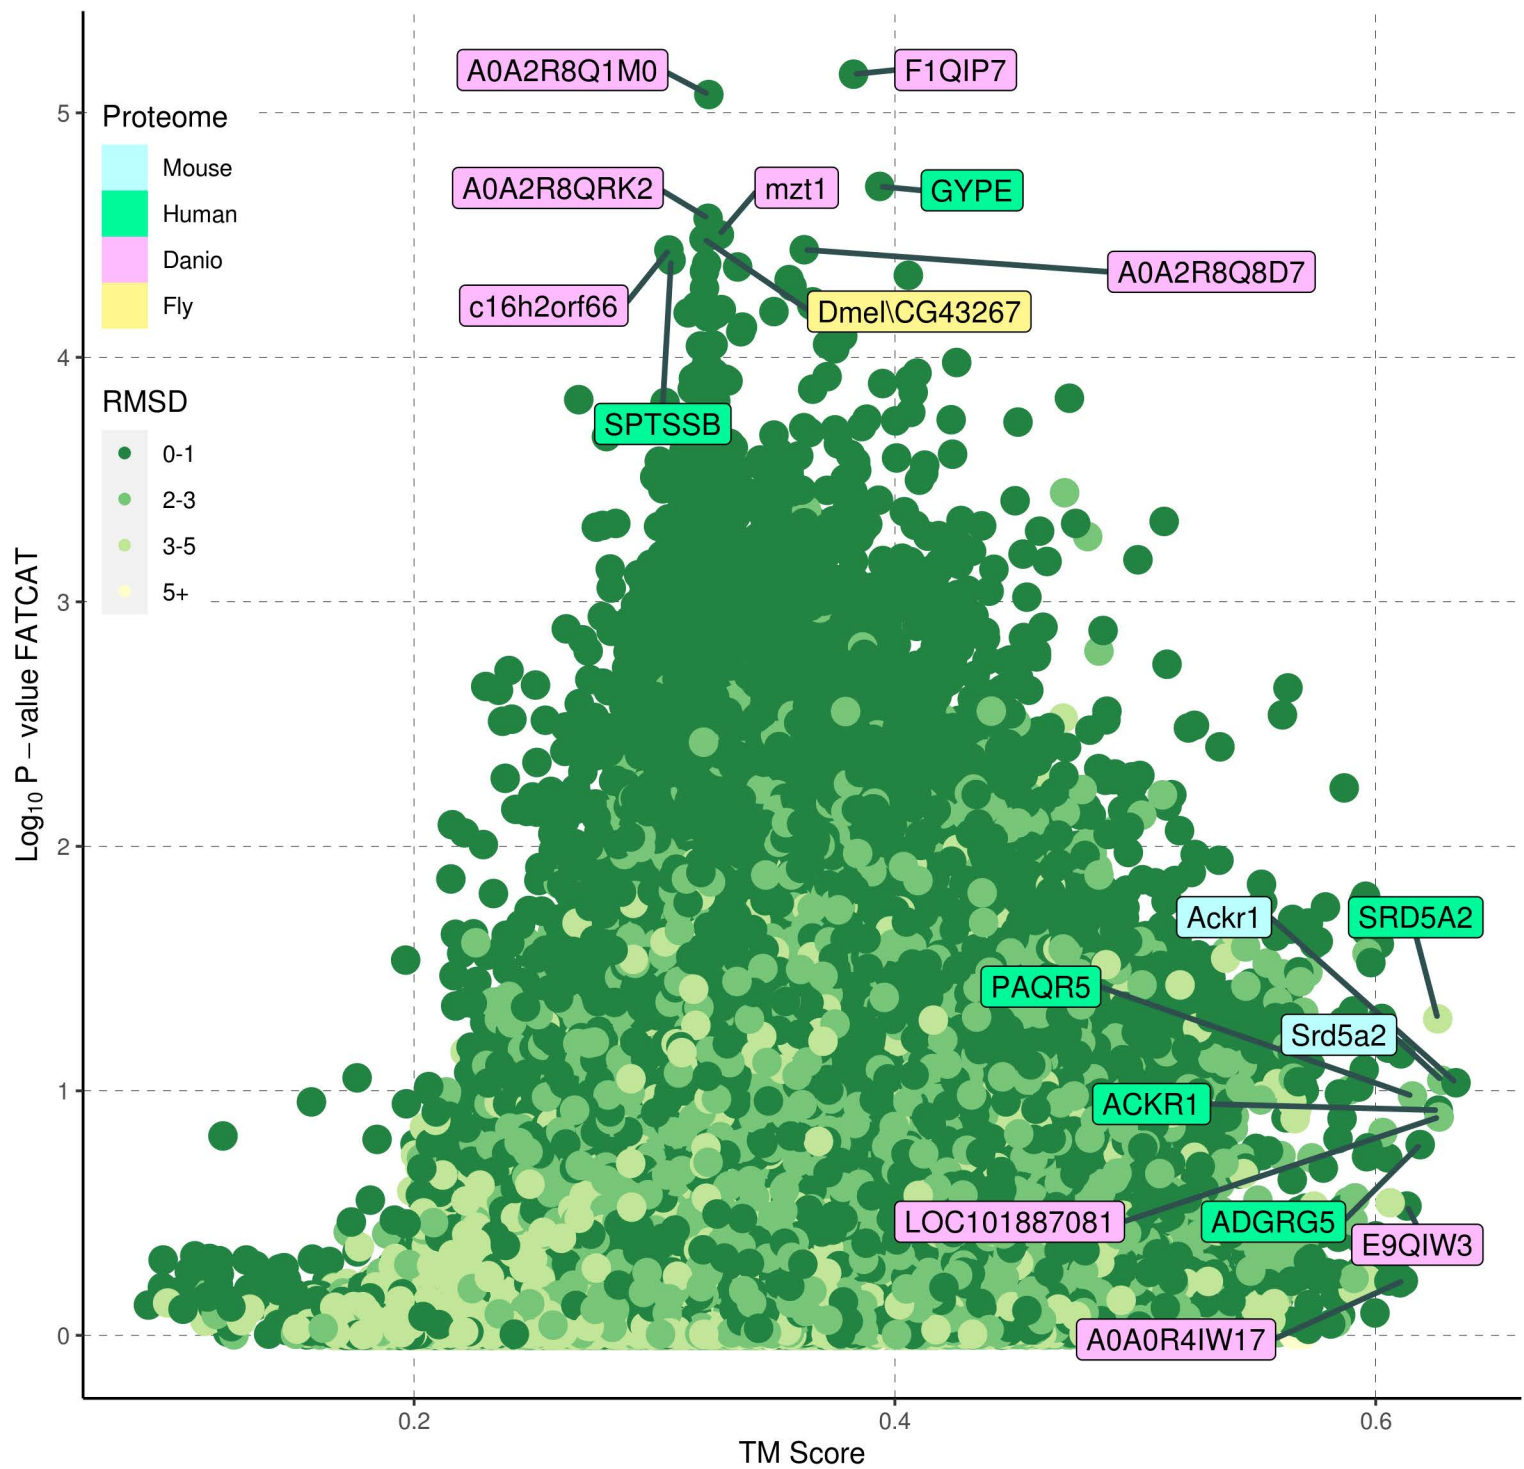

F15 : No hits, top-scoring values are indicated

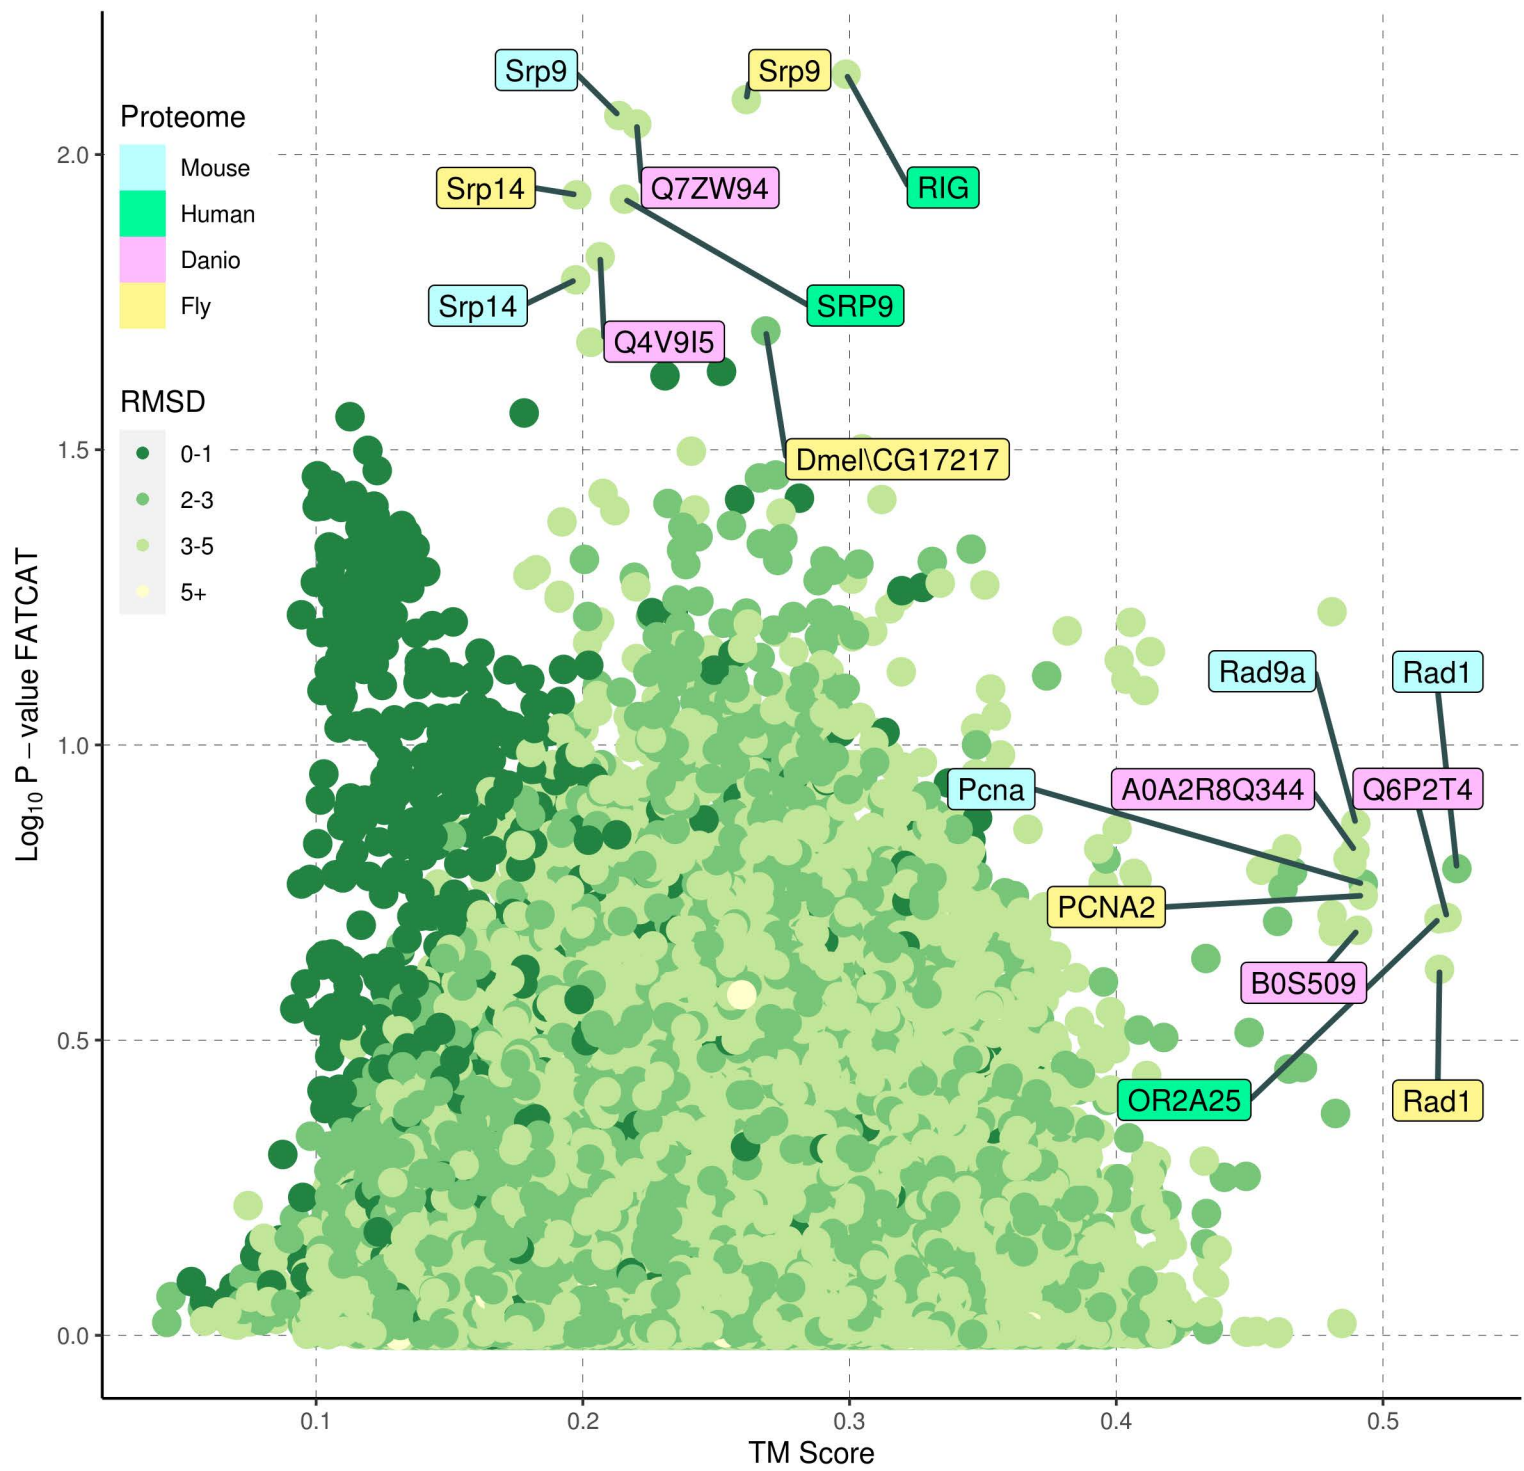

# F16 : No hits, top-scoring values are indicated

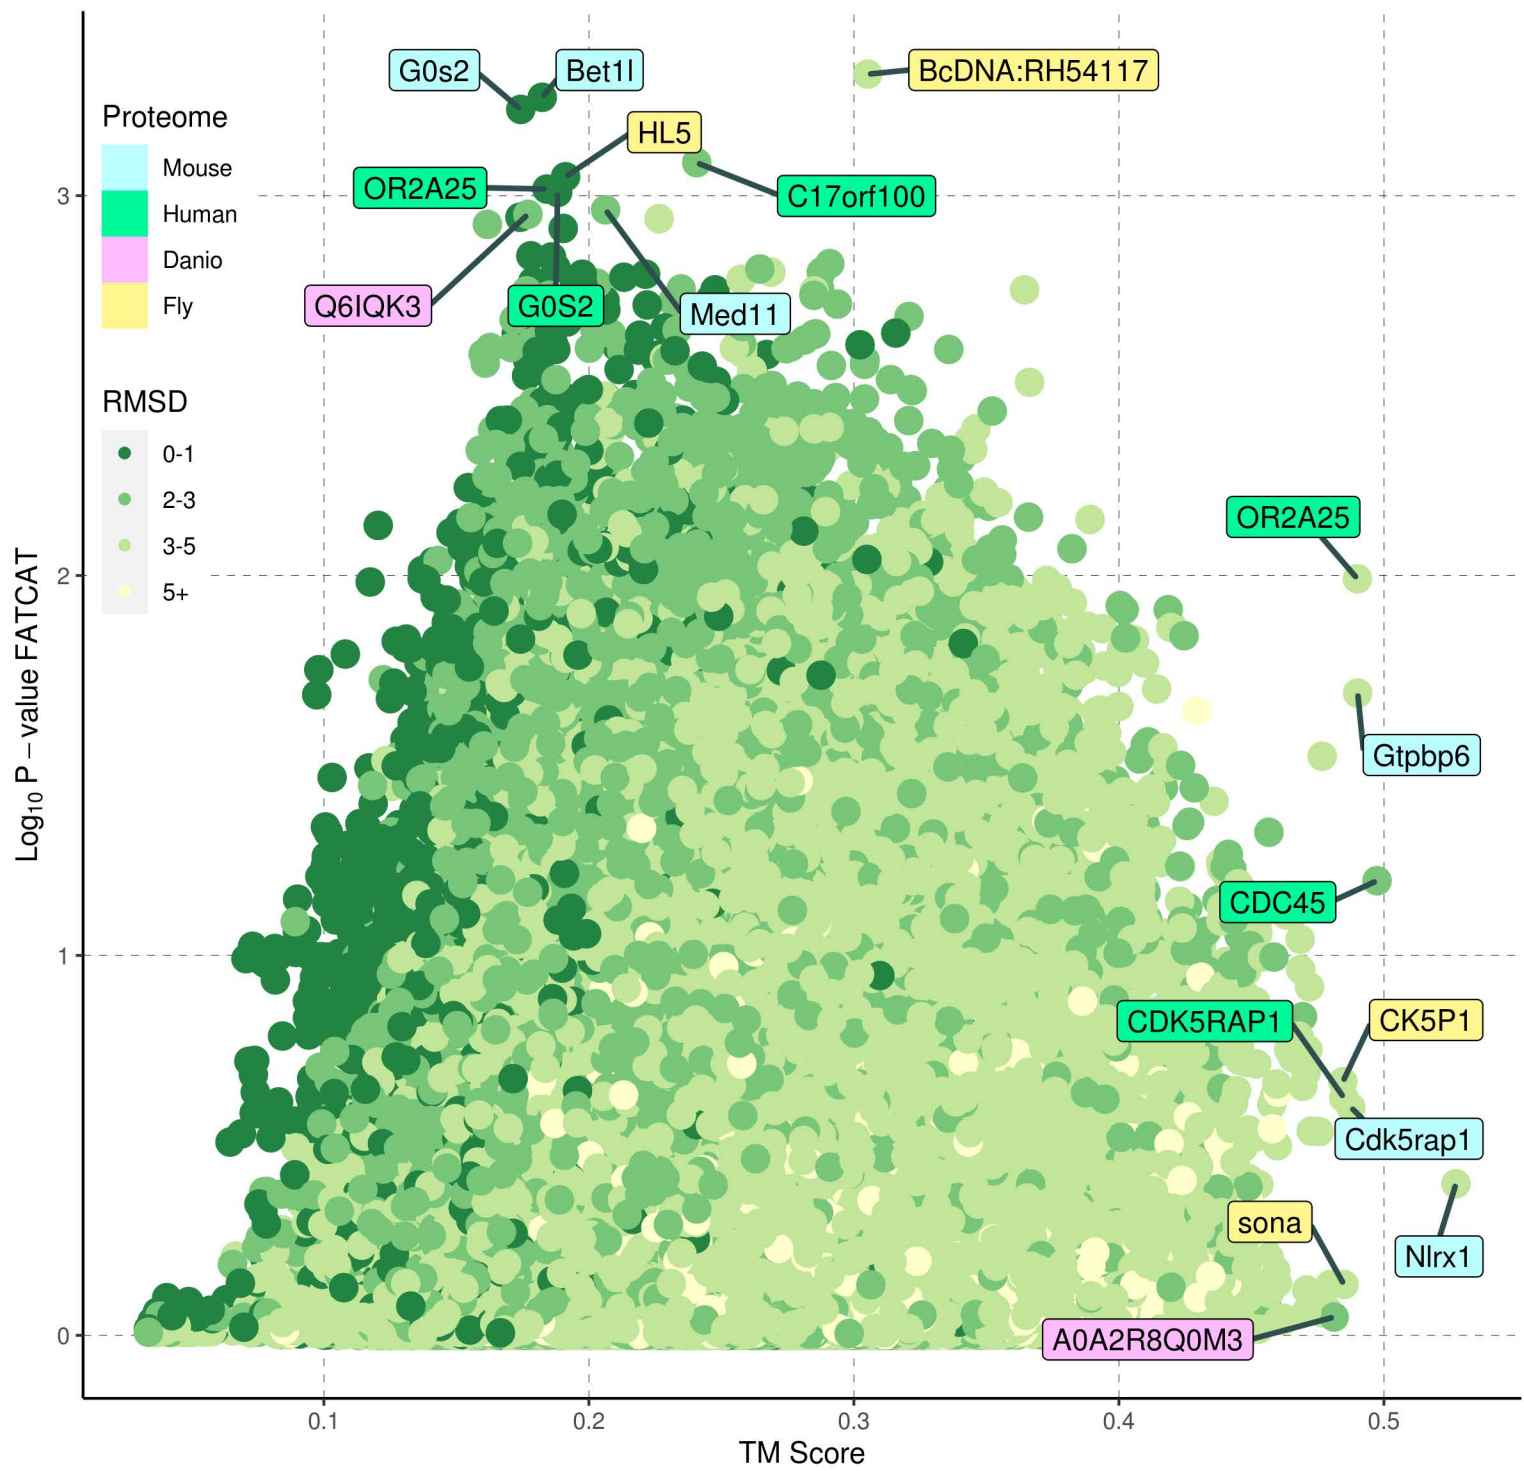

# F17 : No hits, top-scoring values are indicated

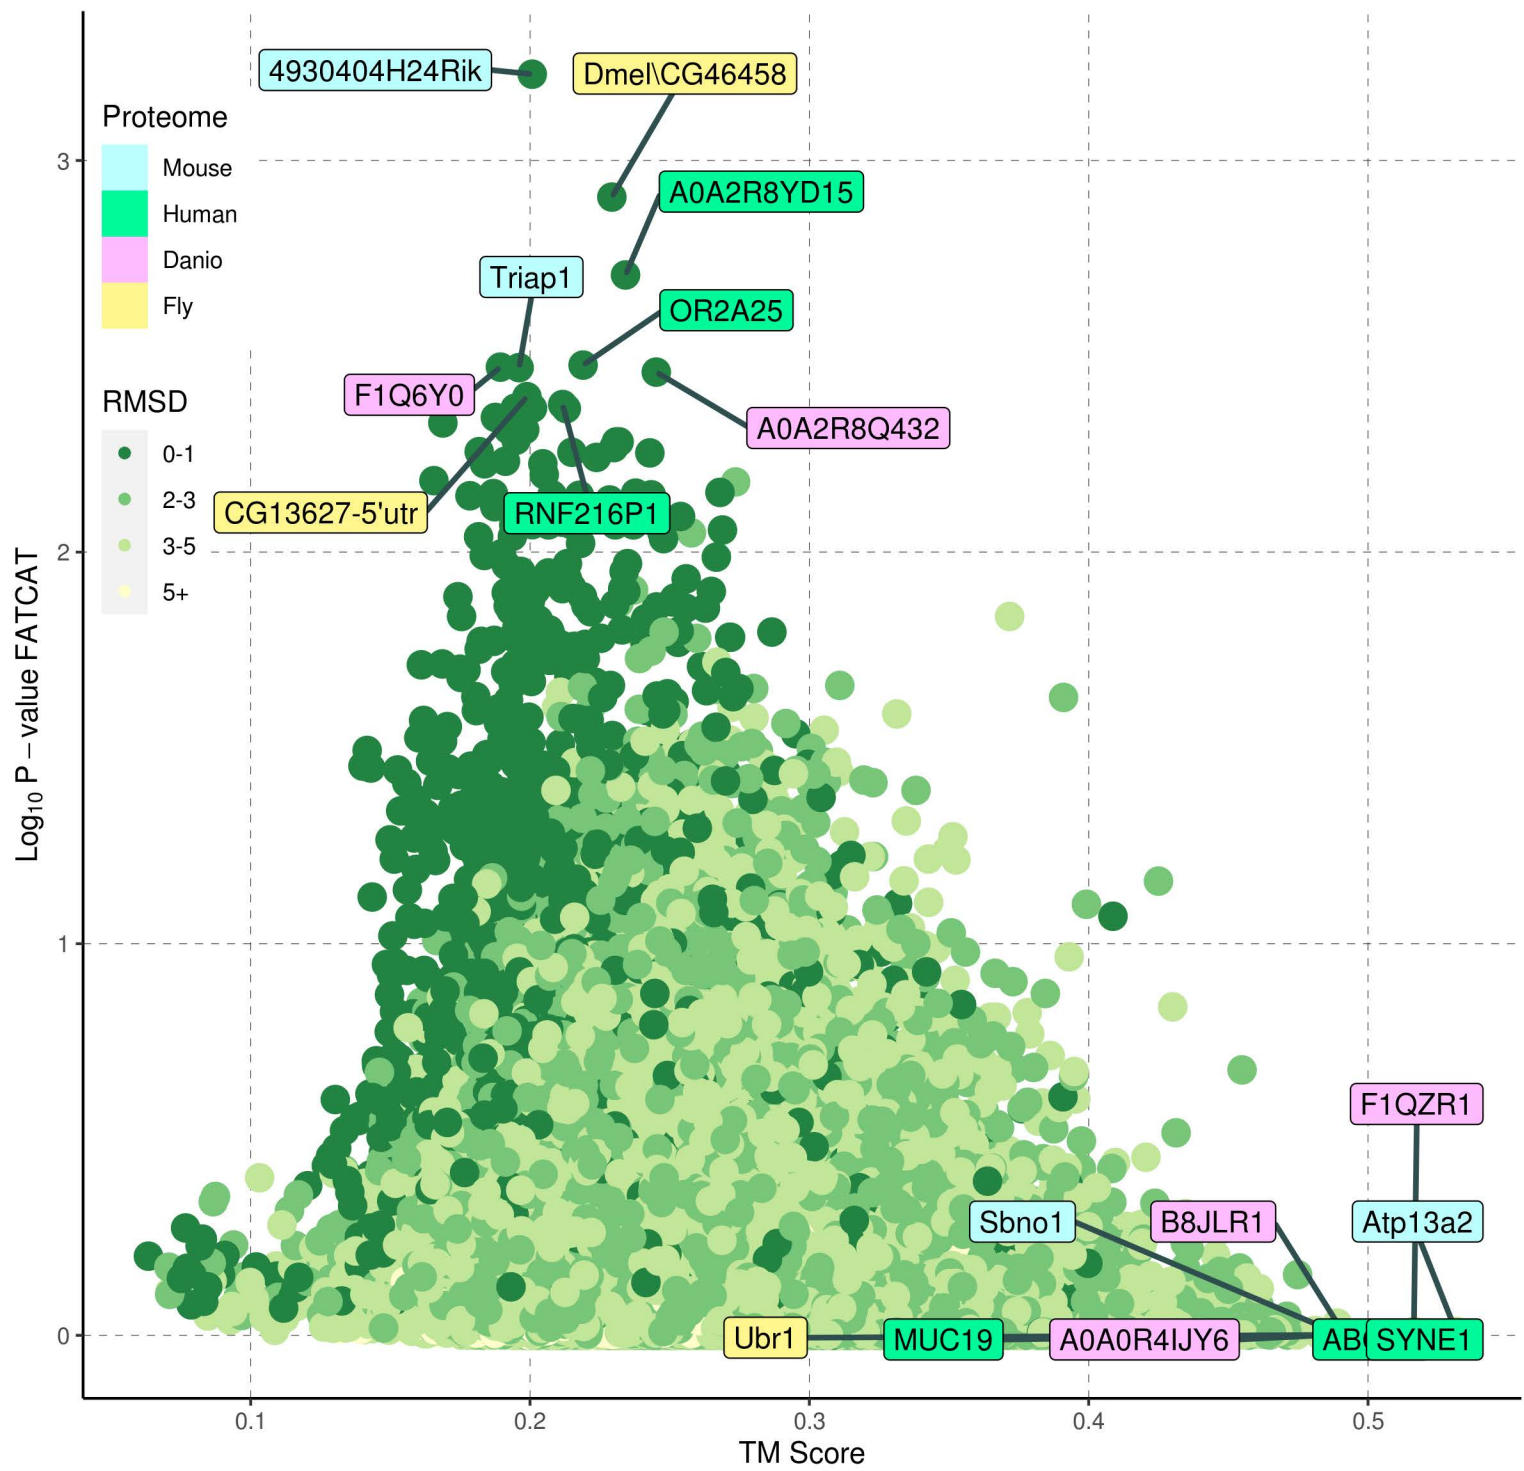

# ForA

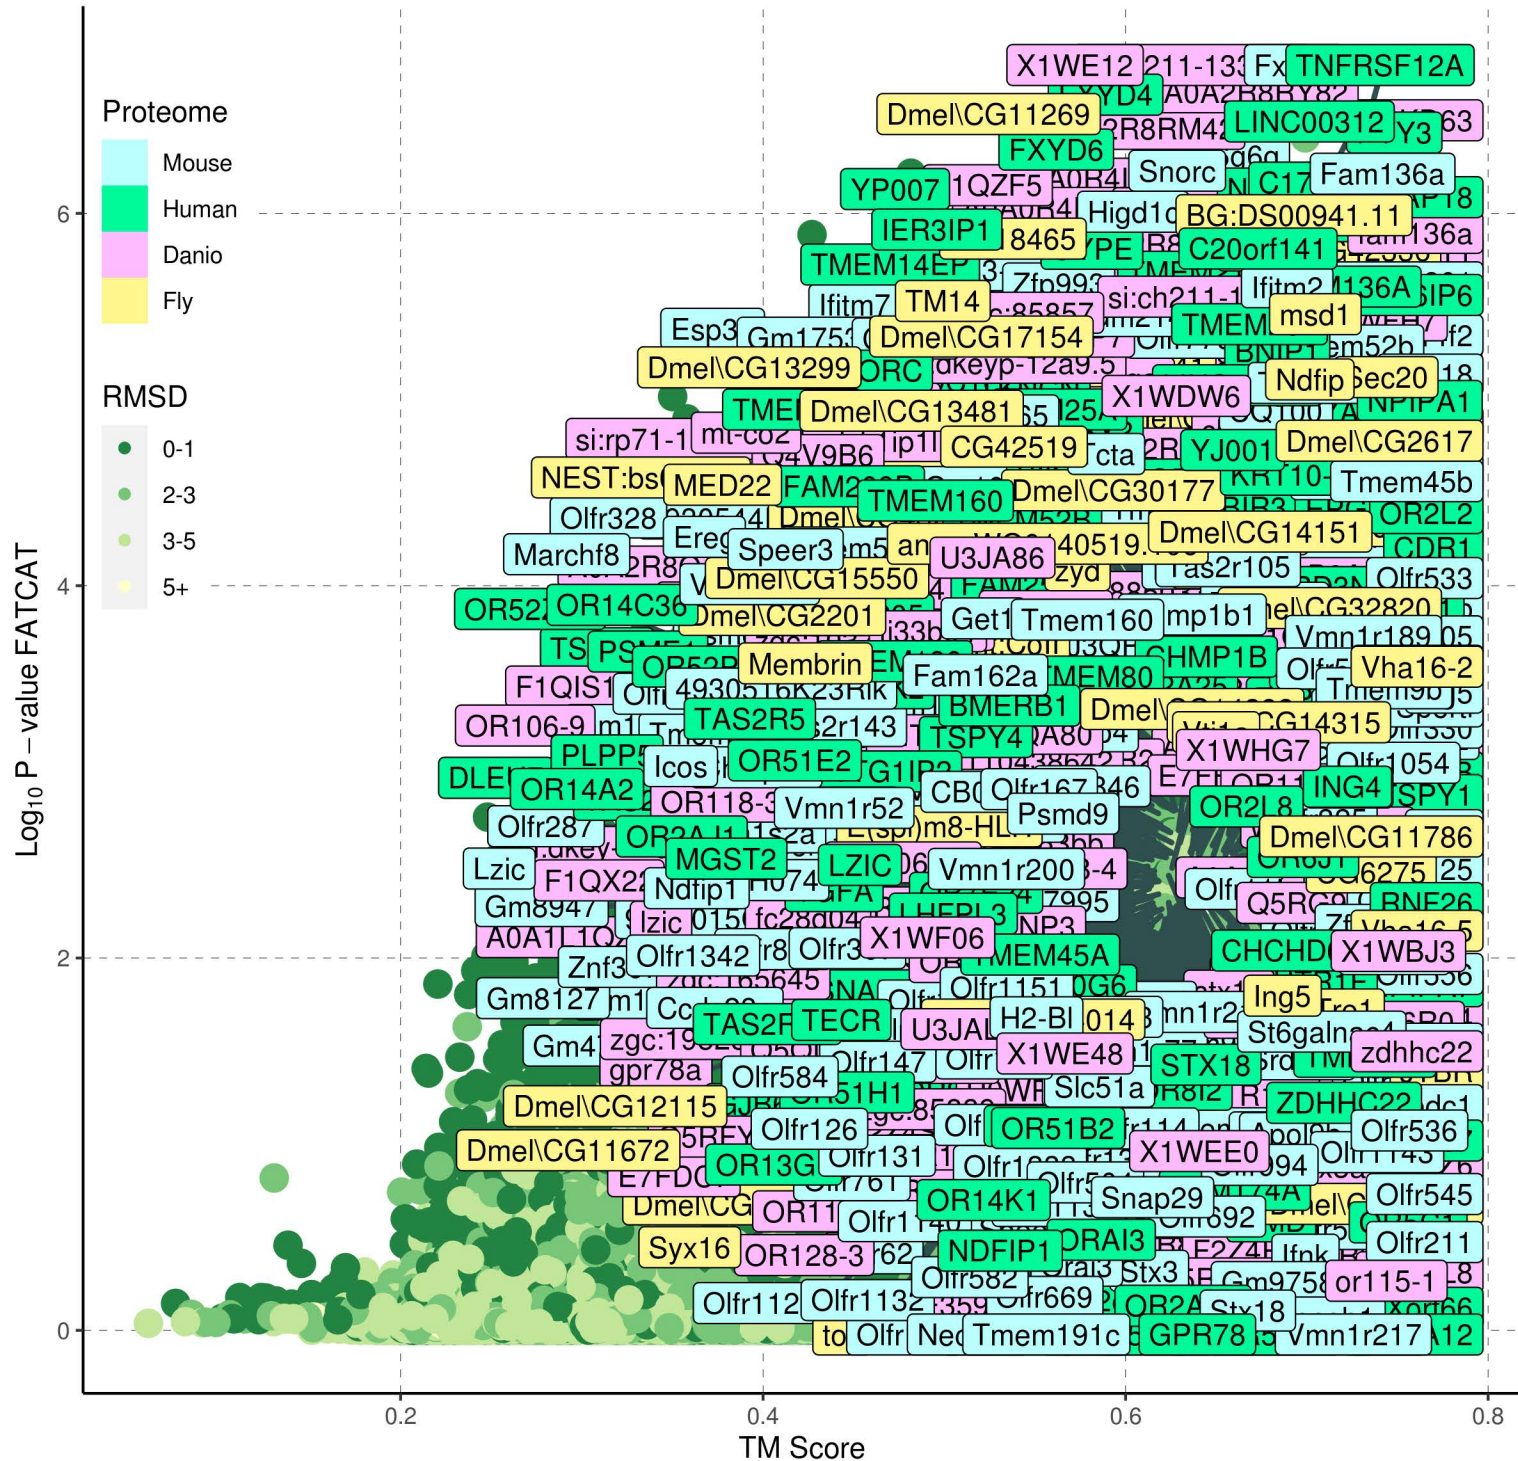

# ForfB : No hits, top-scoring values are indicated

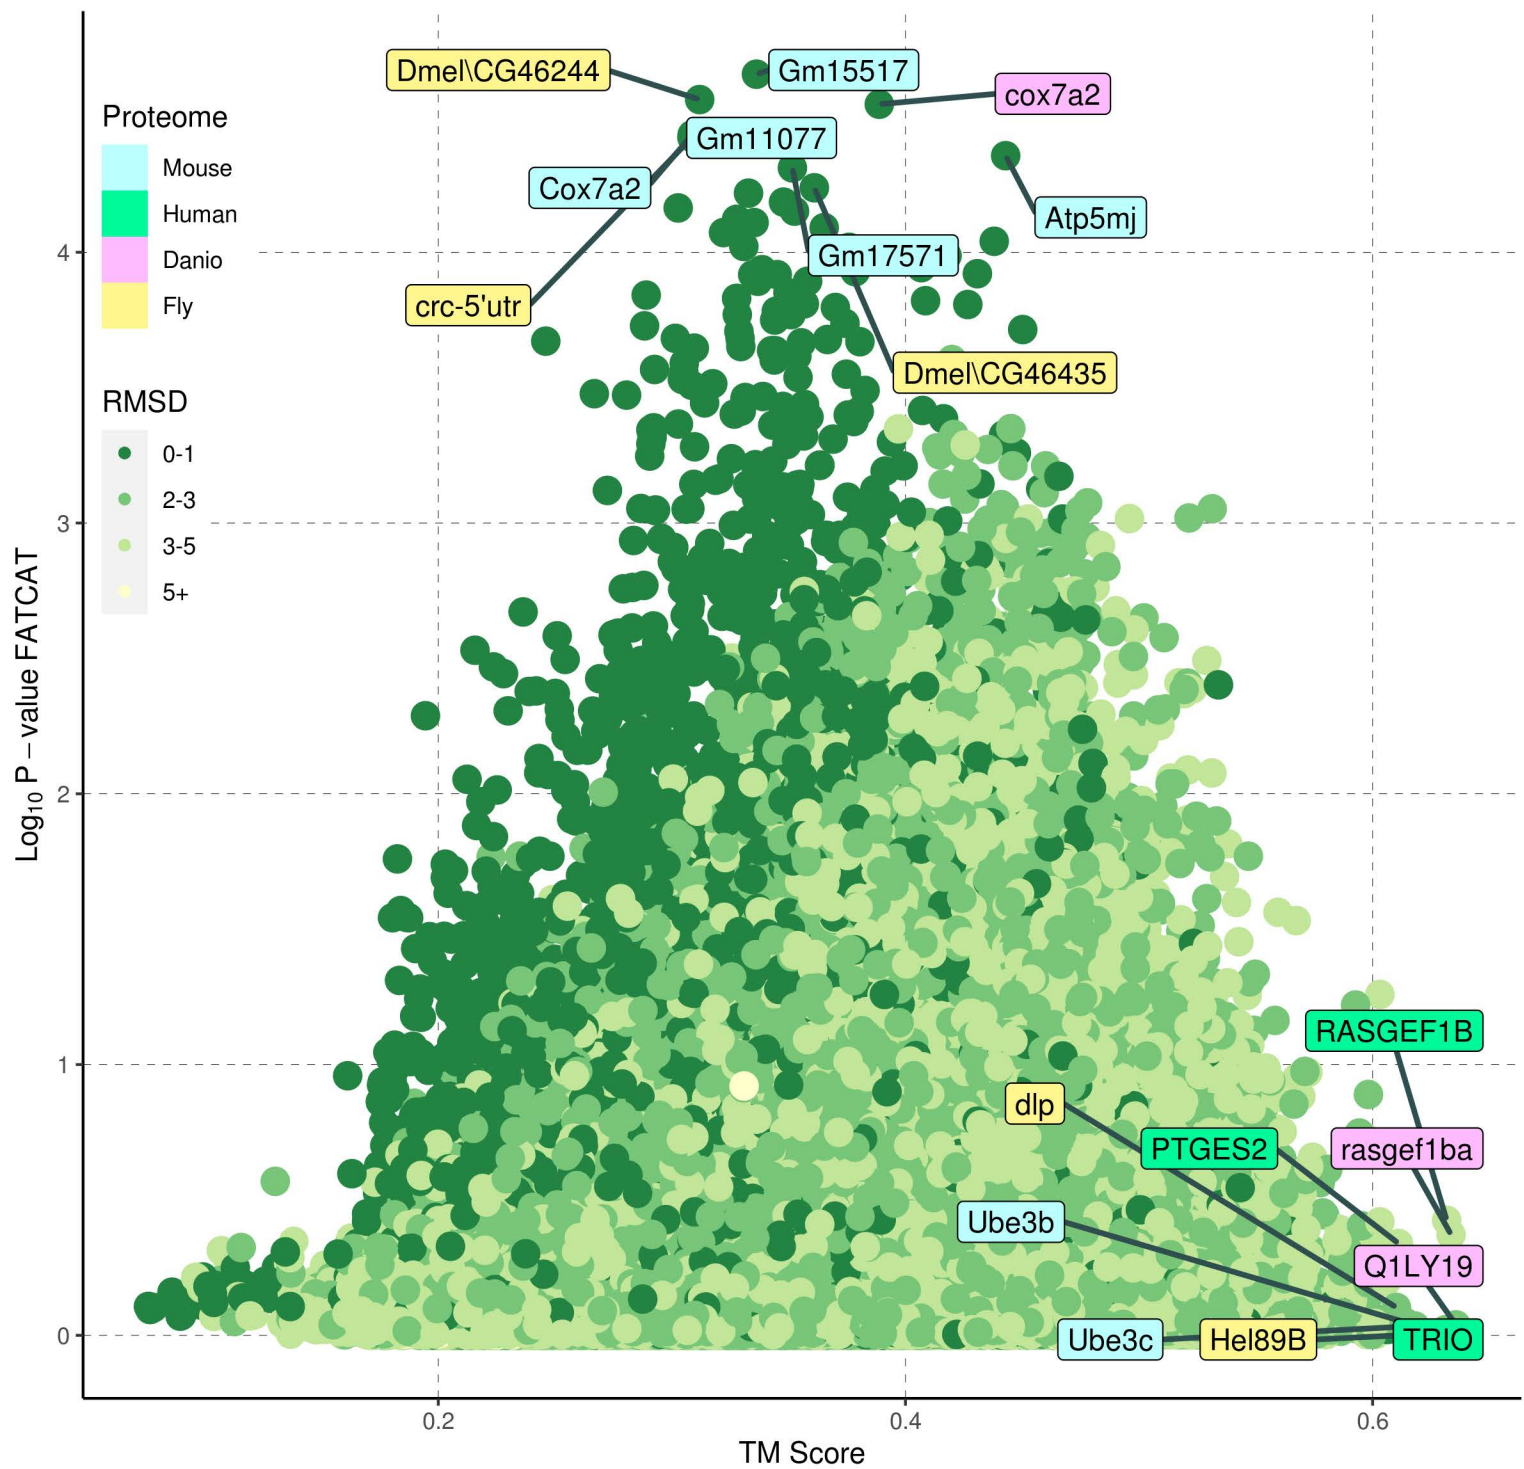

# ForcC

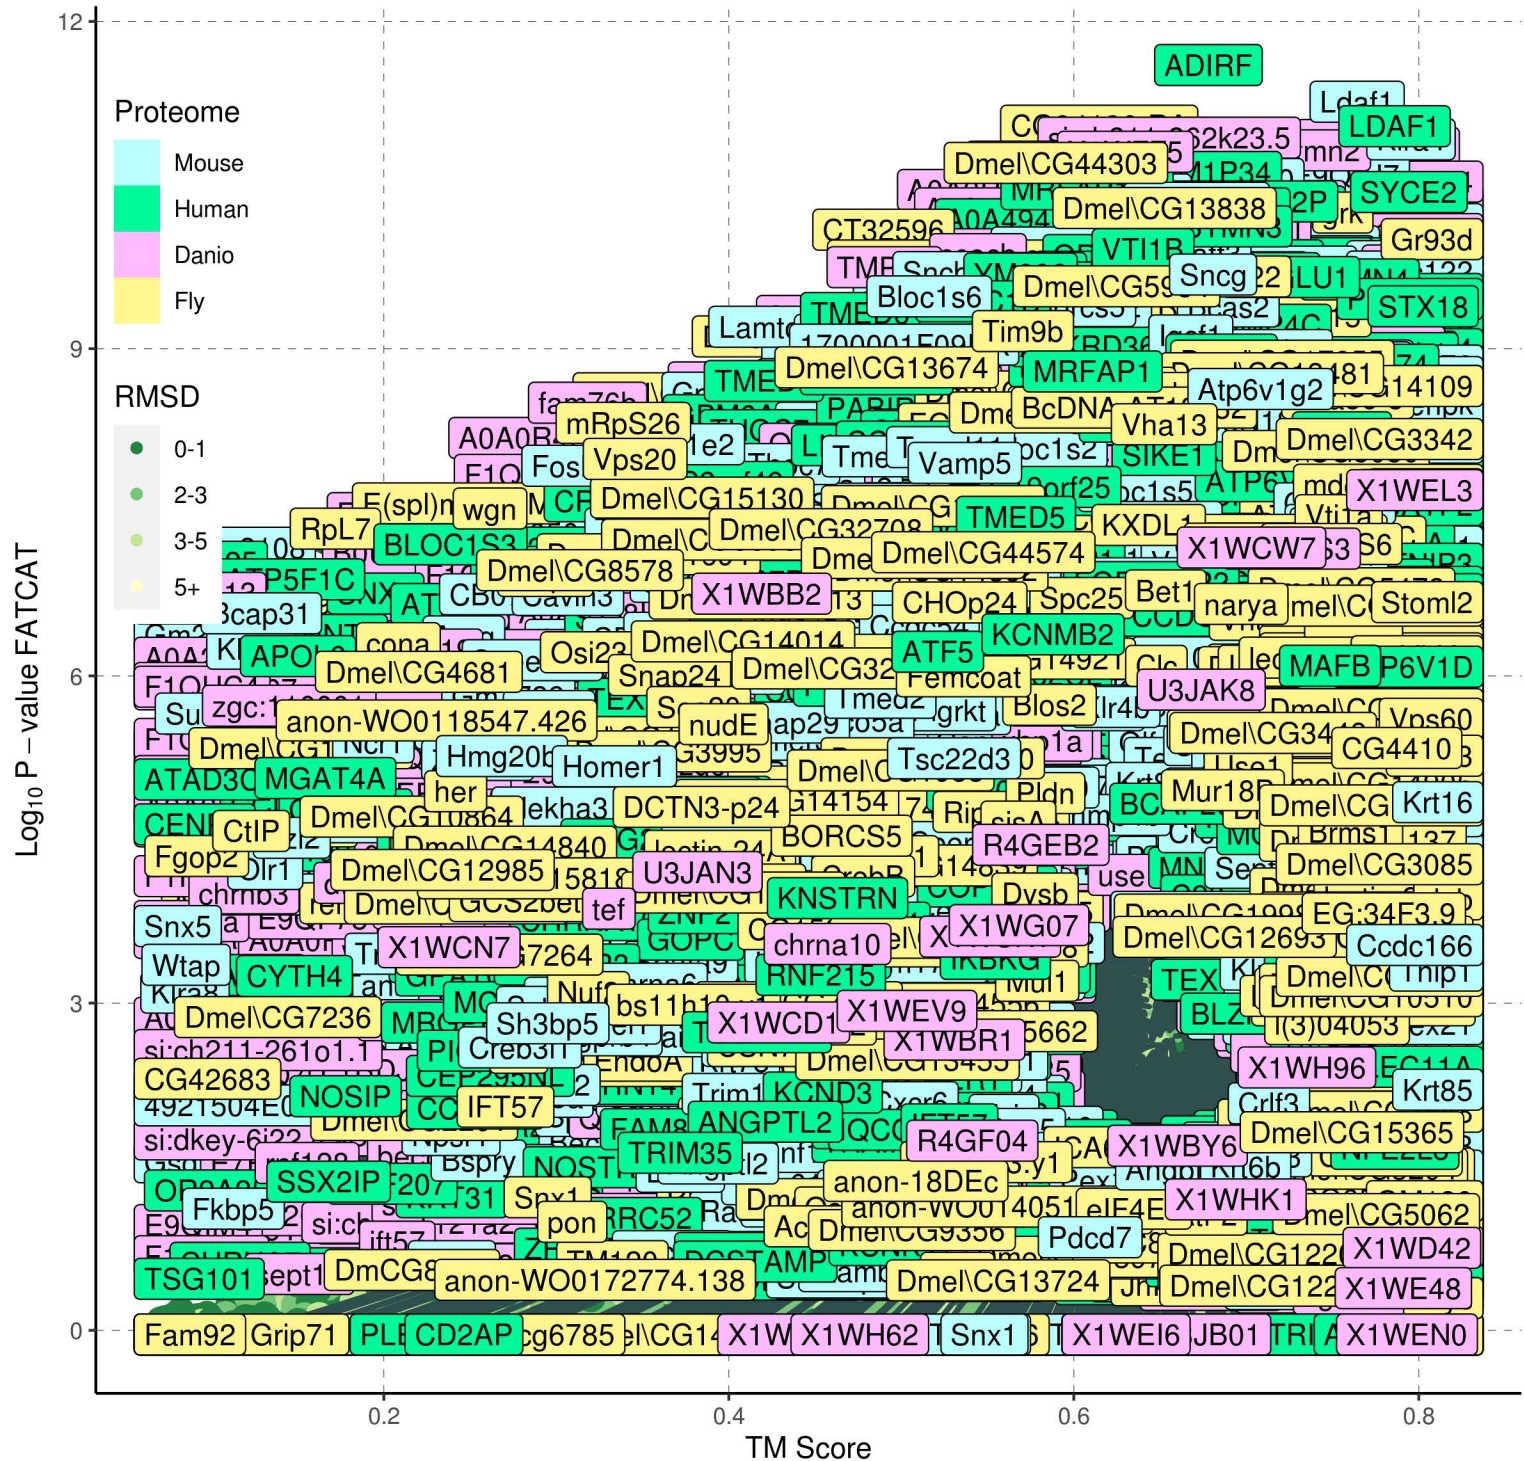



# ForfD

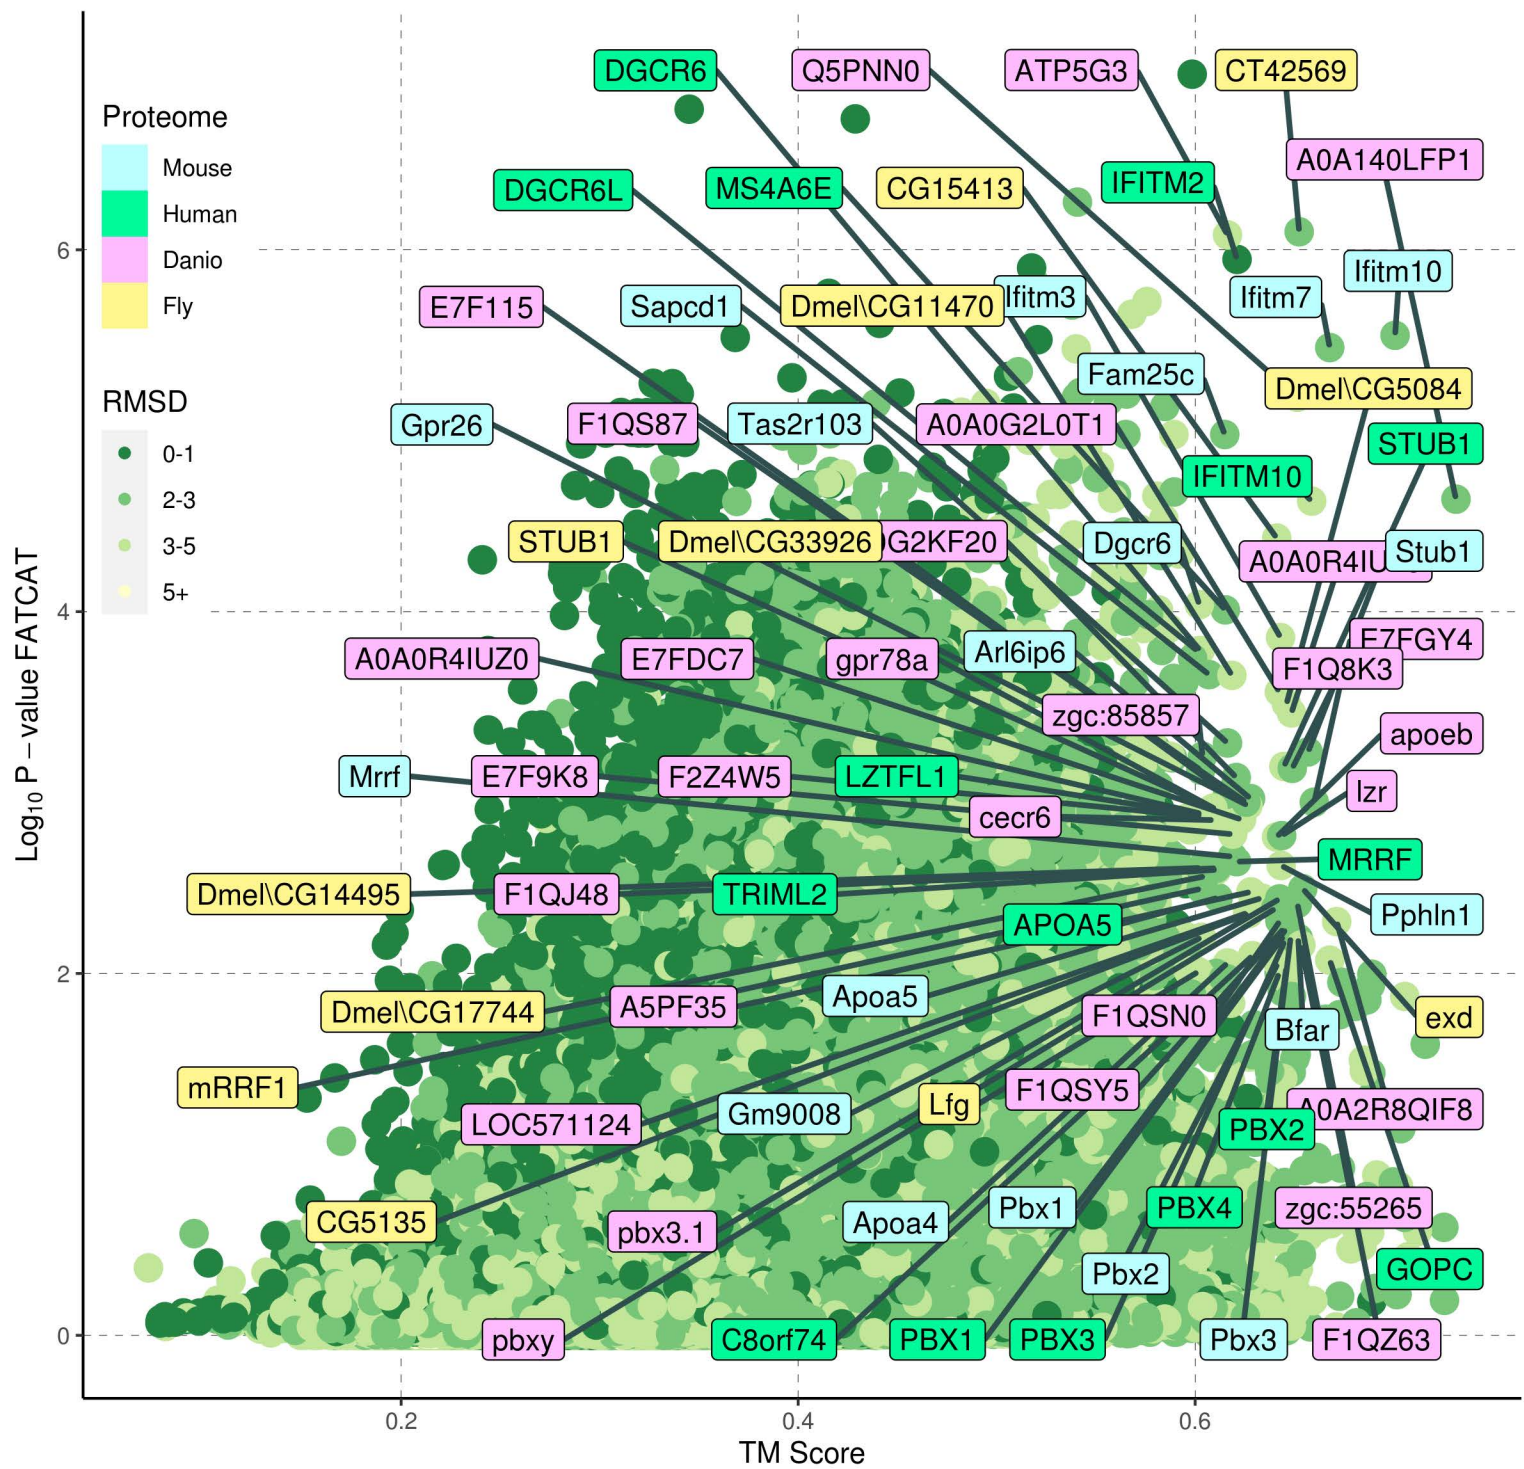

# ForfE

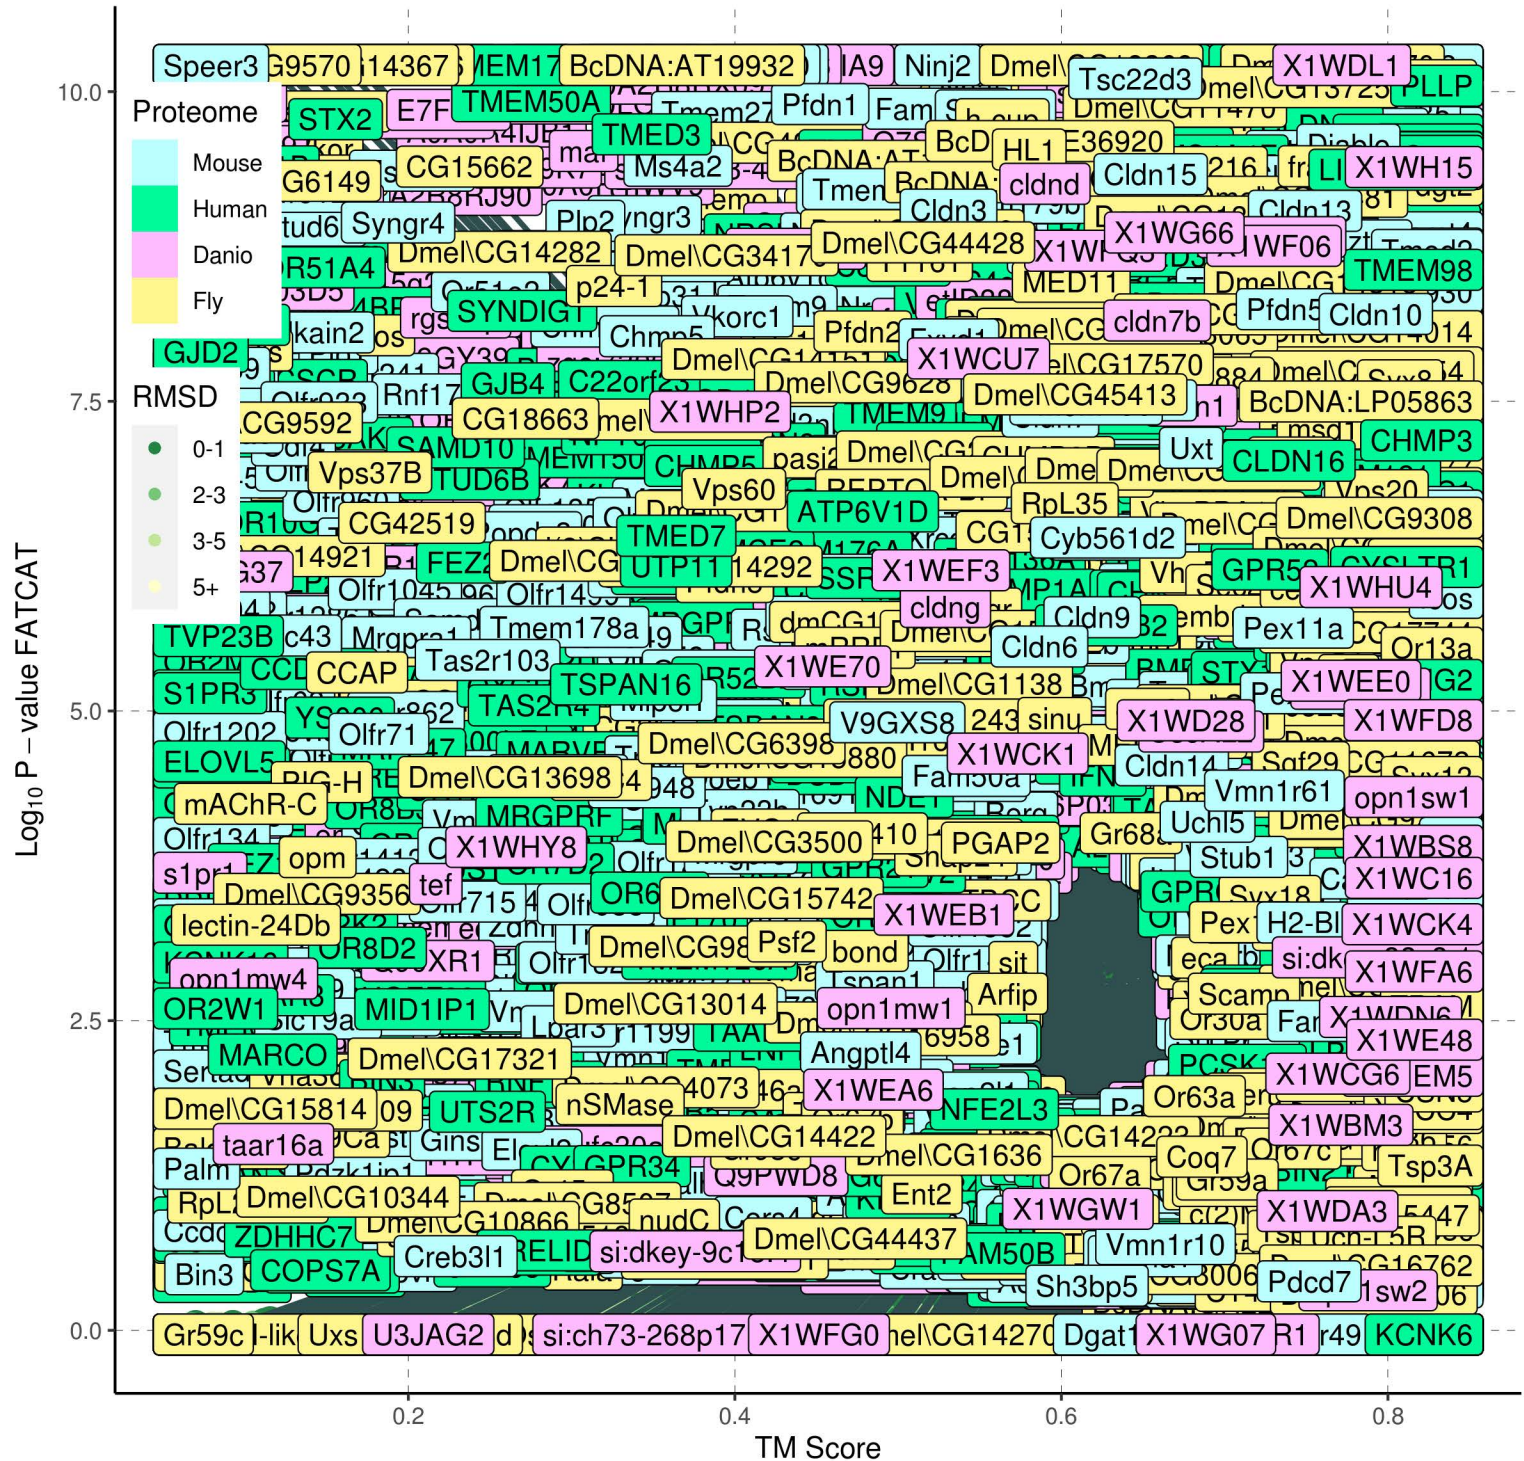

# ForrF

Log<sub>10</sub> P-value FATCAT

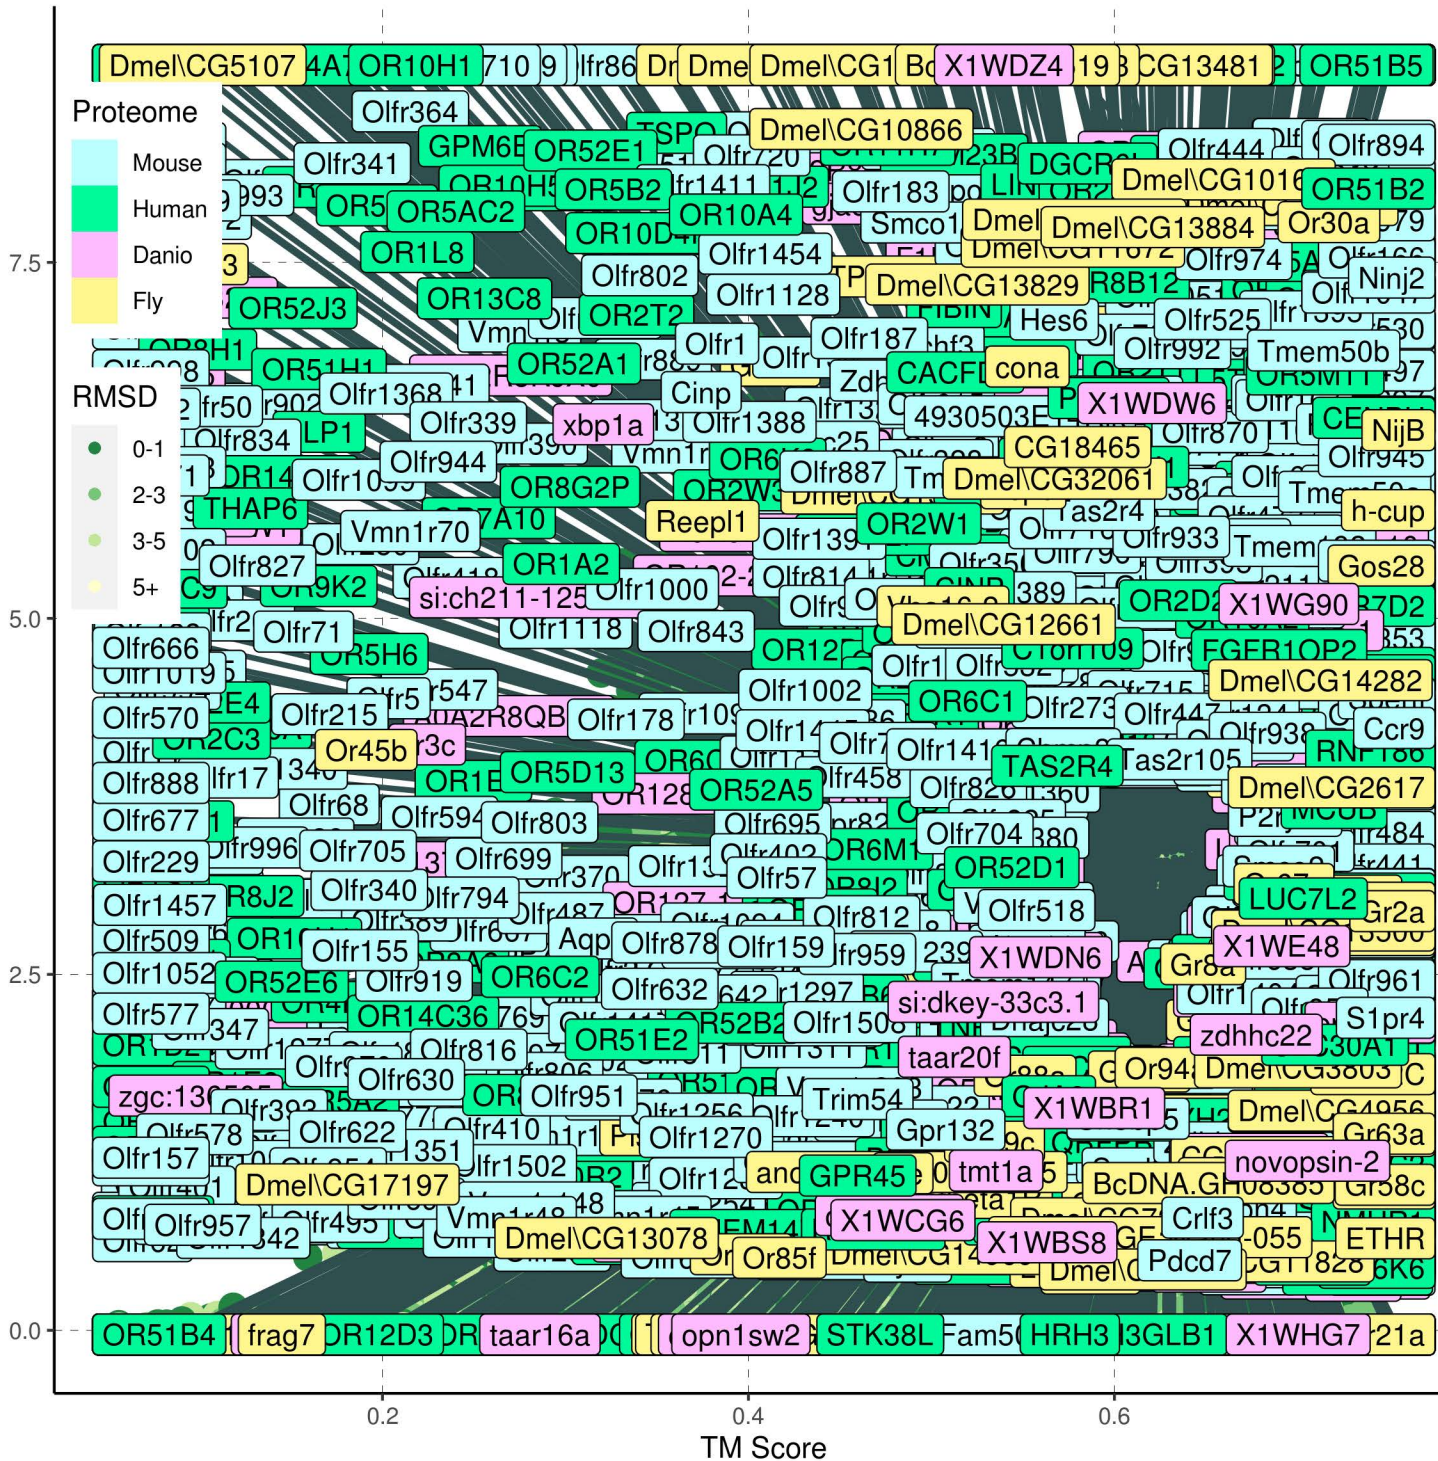

G1

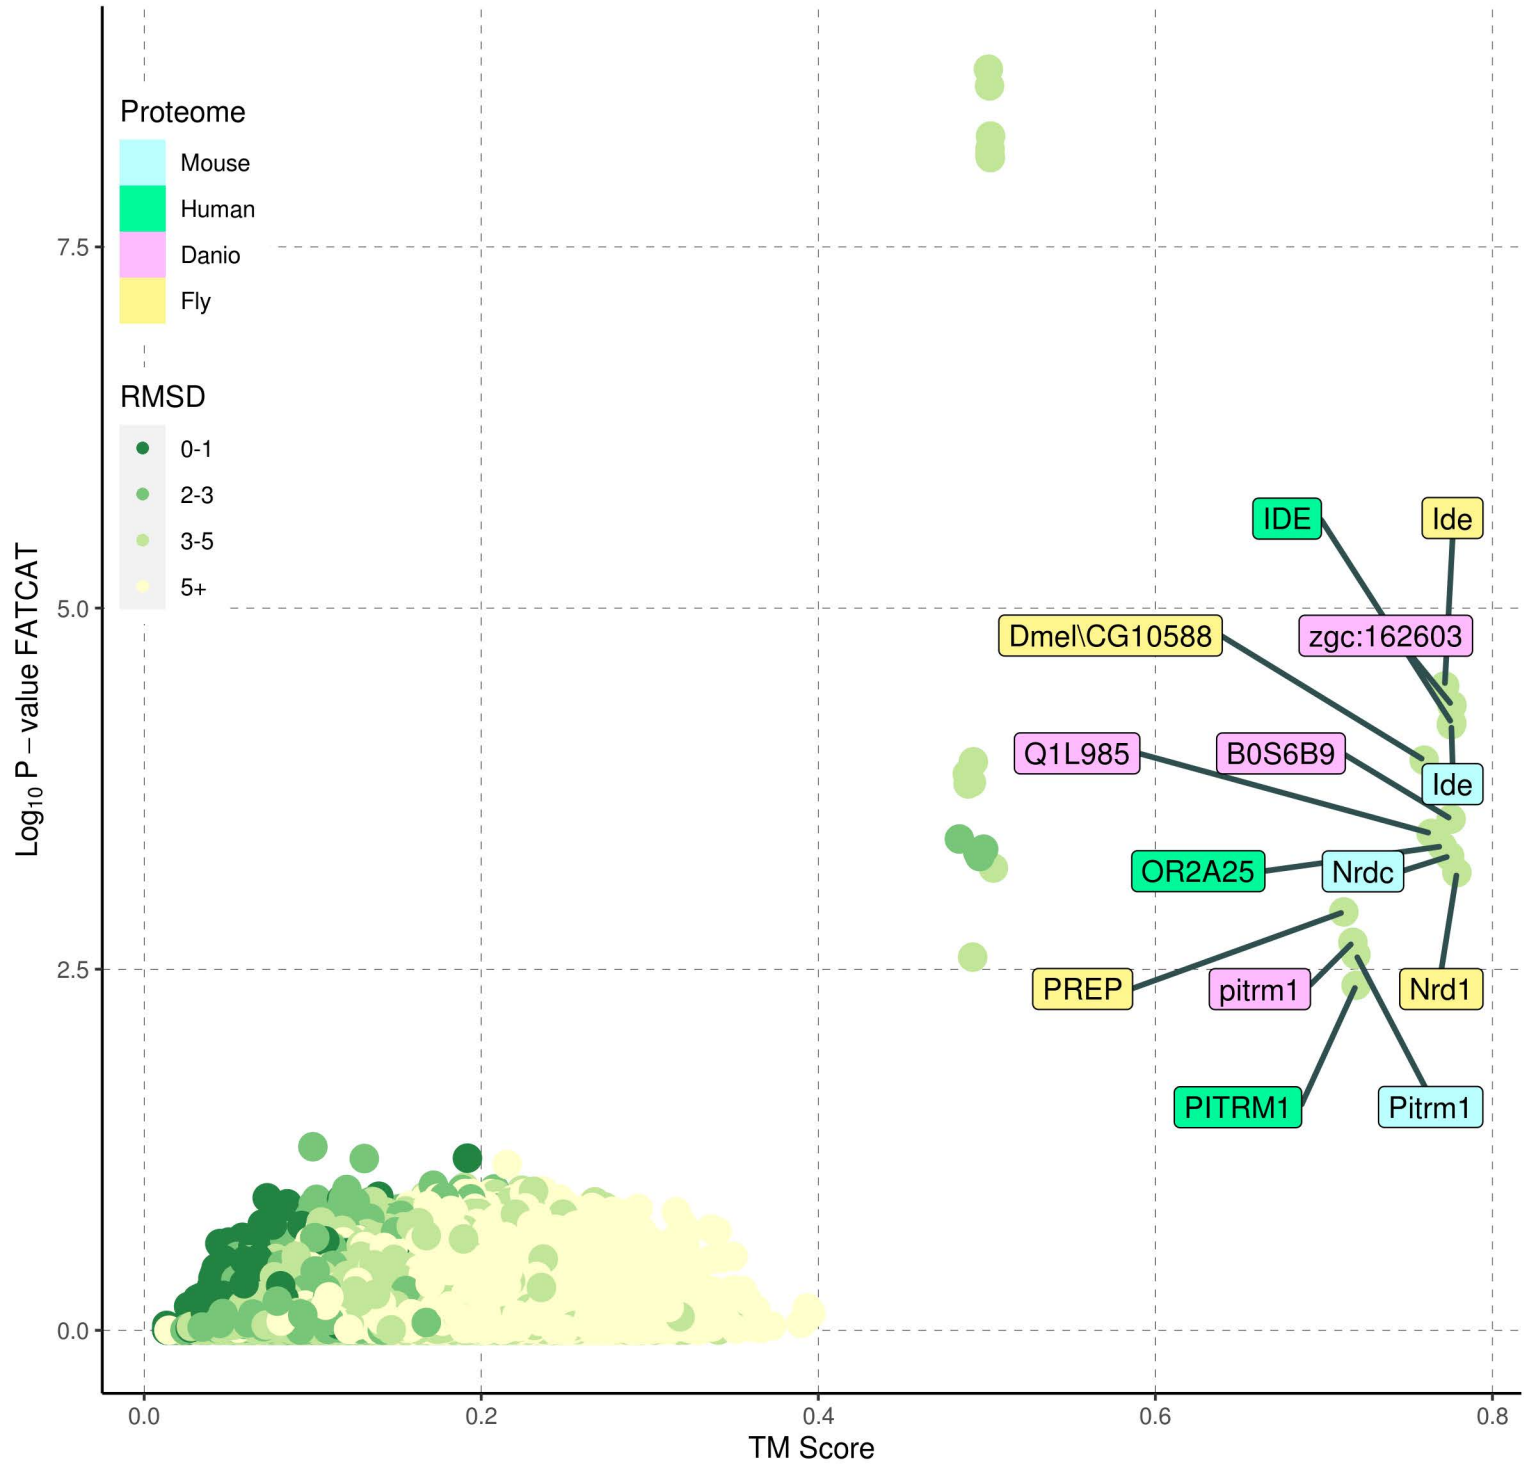

G2 : No hits, top-scoring values are indicated

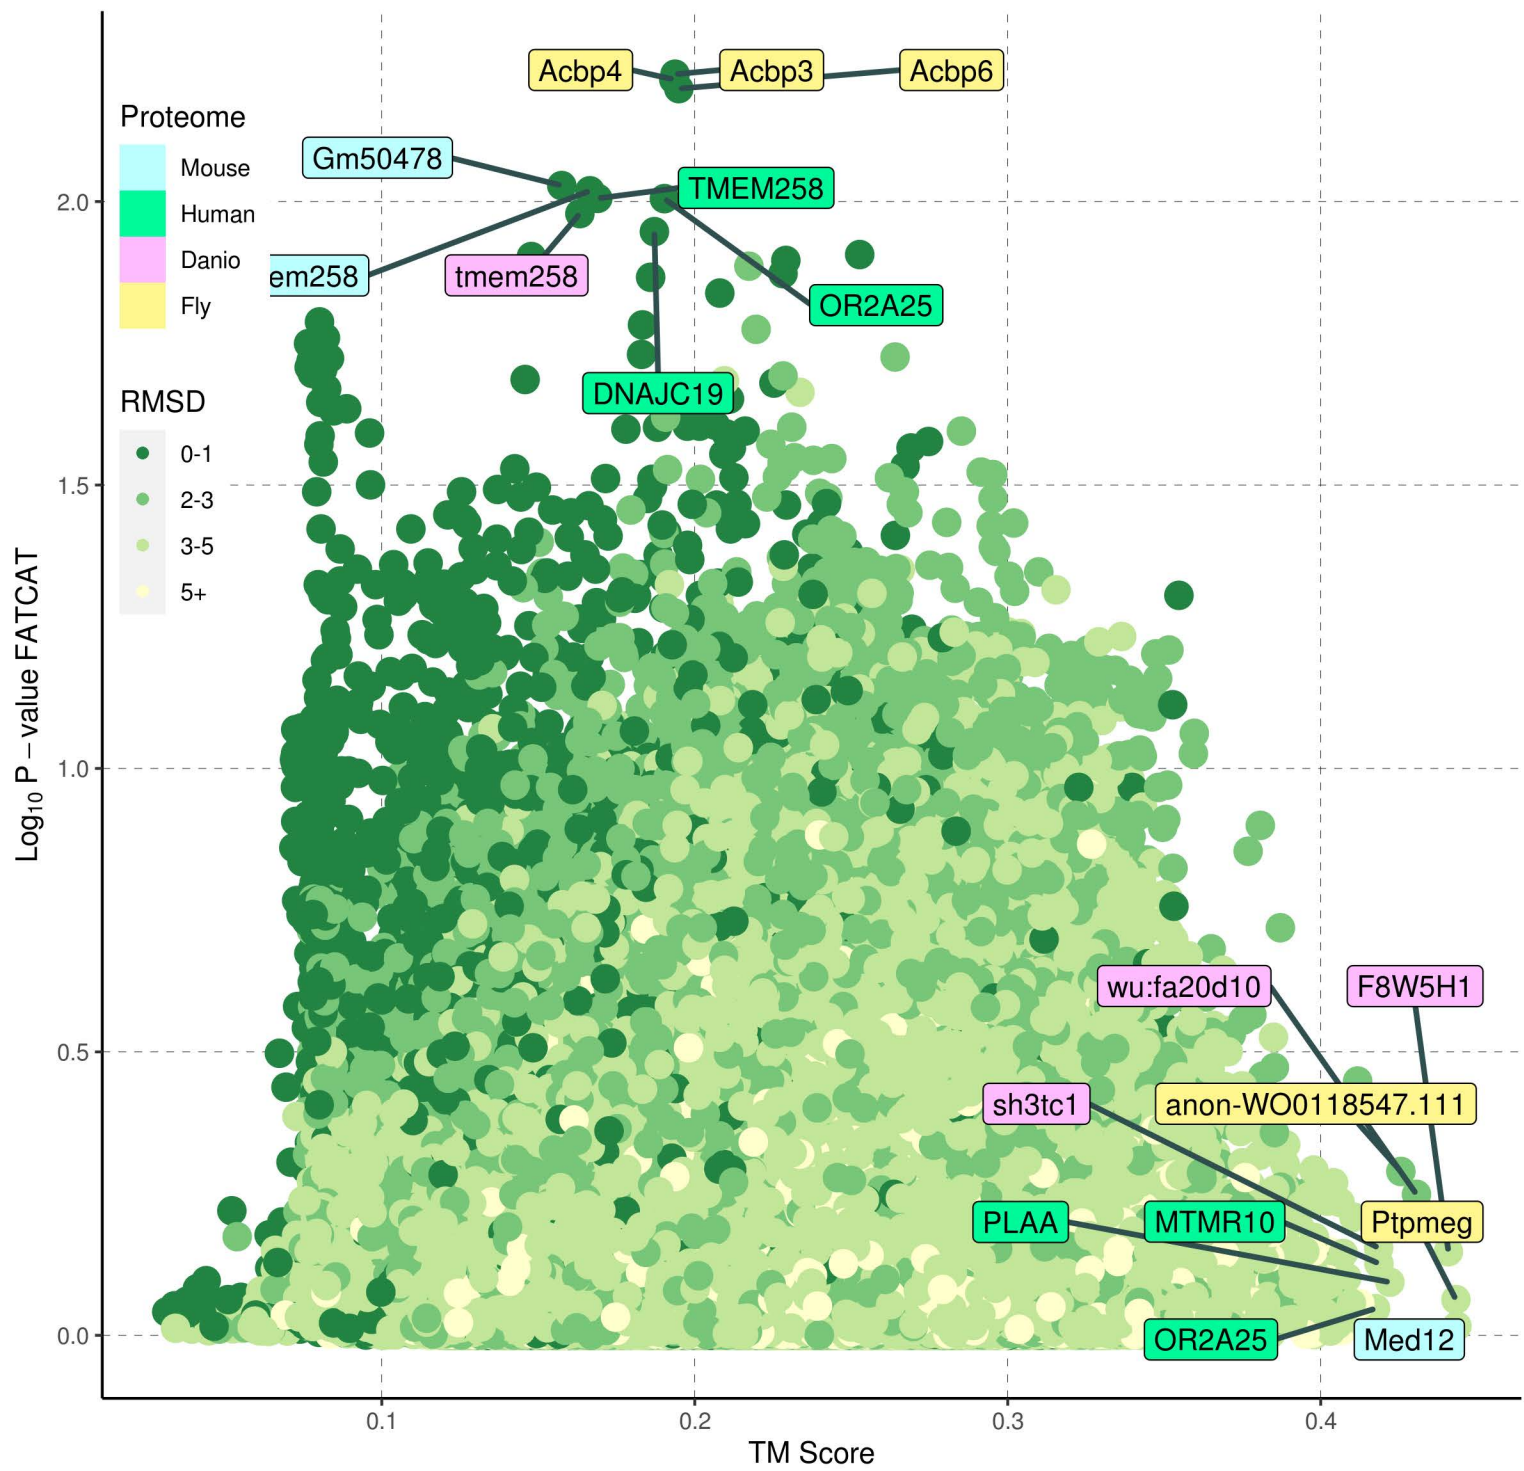

# G3 : No hits, top-scoring values are indicated

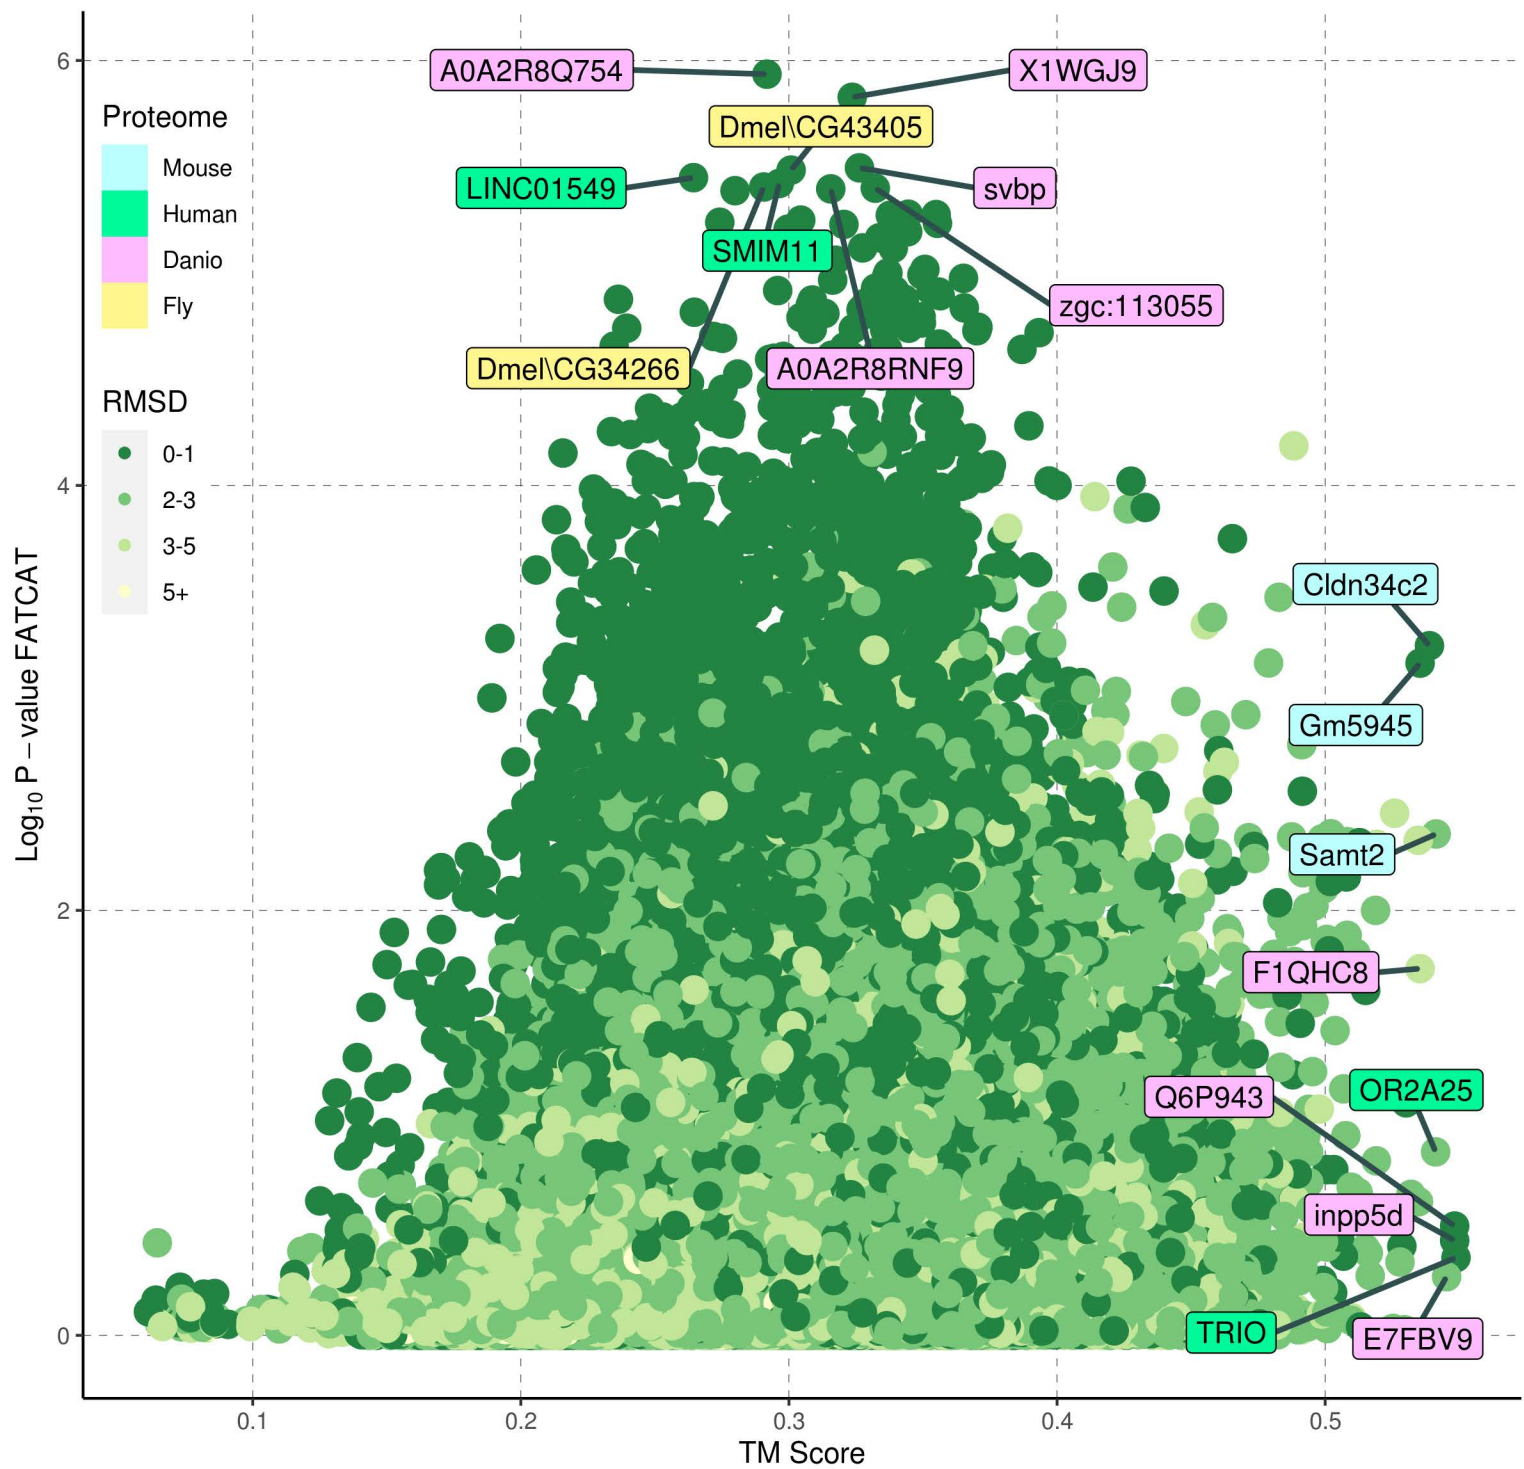

G4 : No hits, top-scoring values are indicated

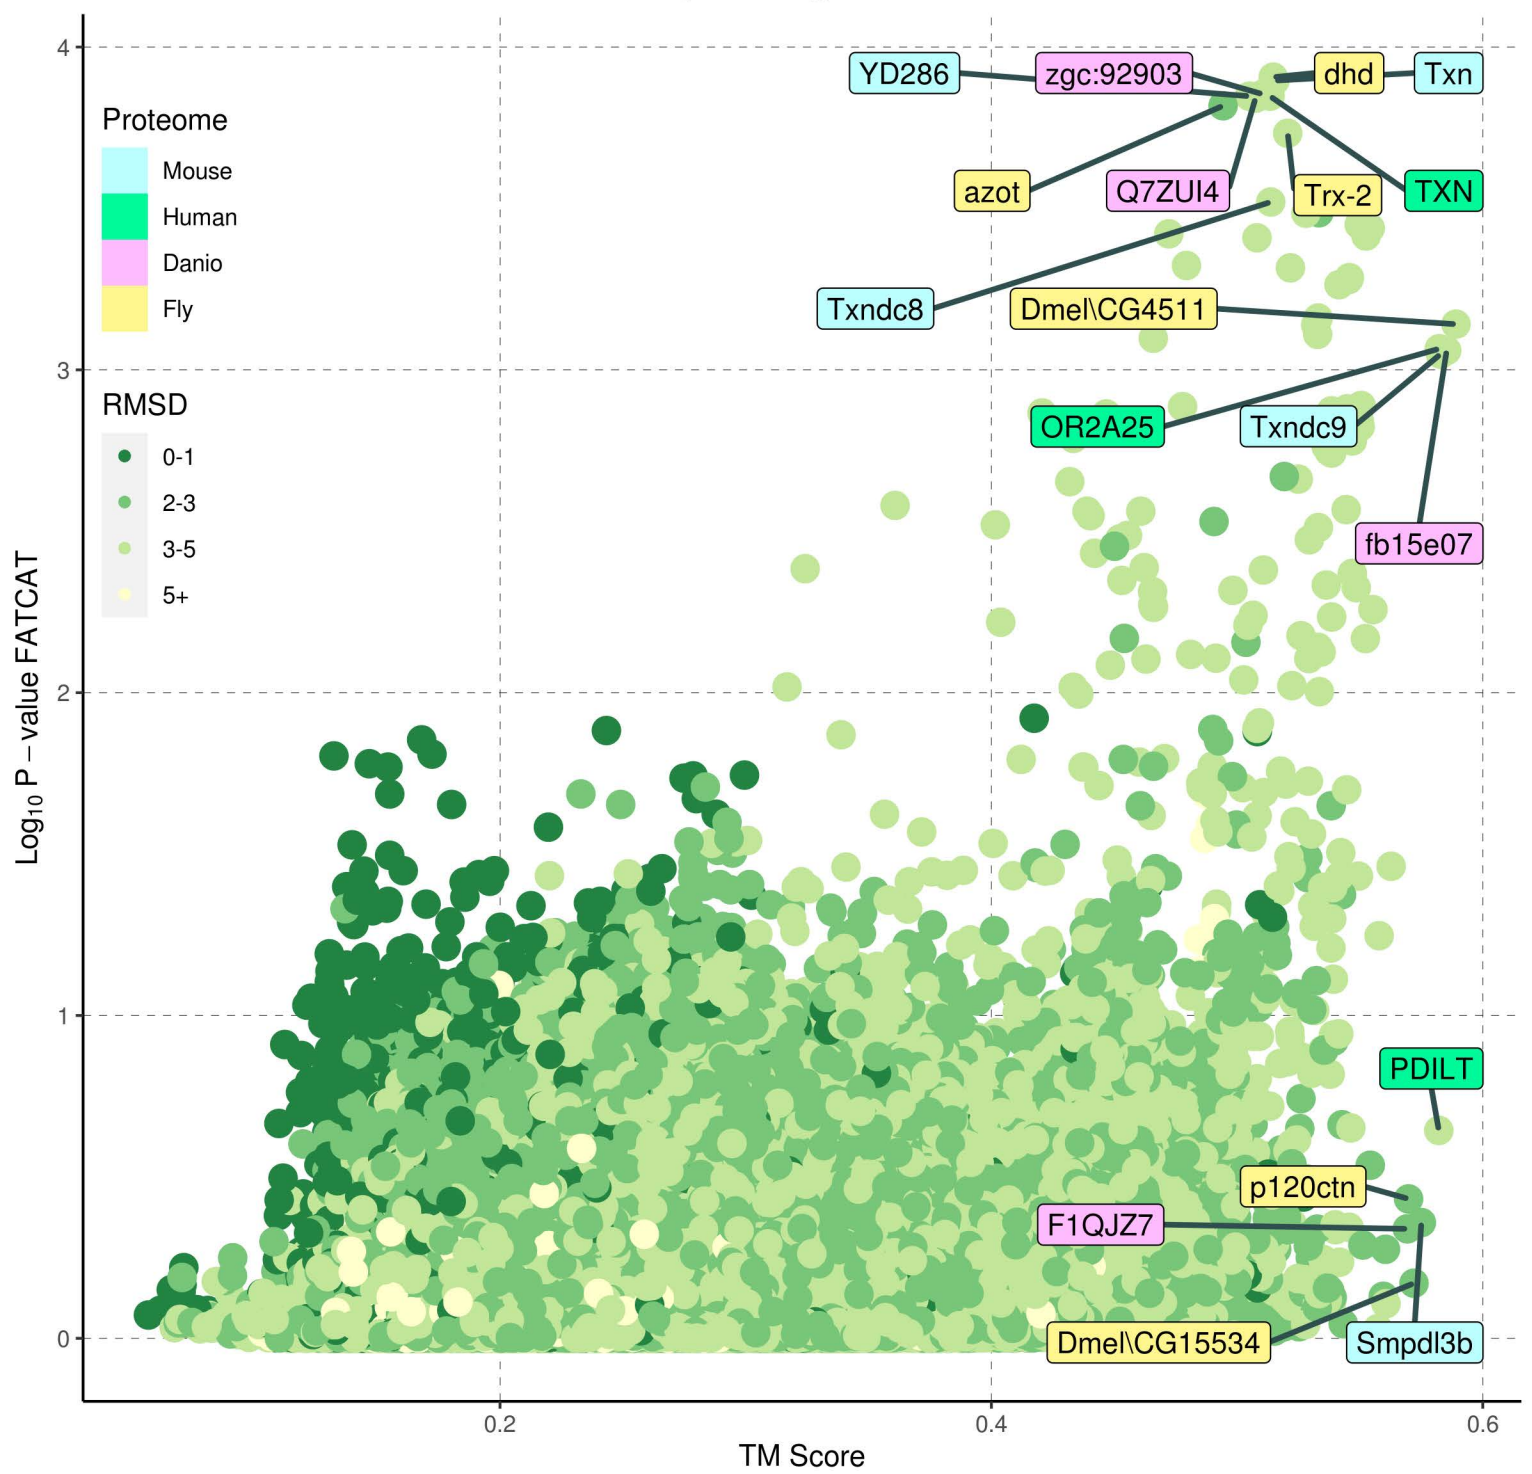

G5 : No hits, top-scoring values are indicated

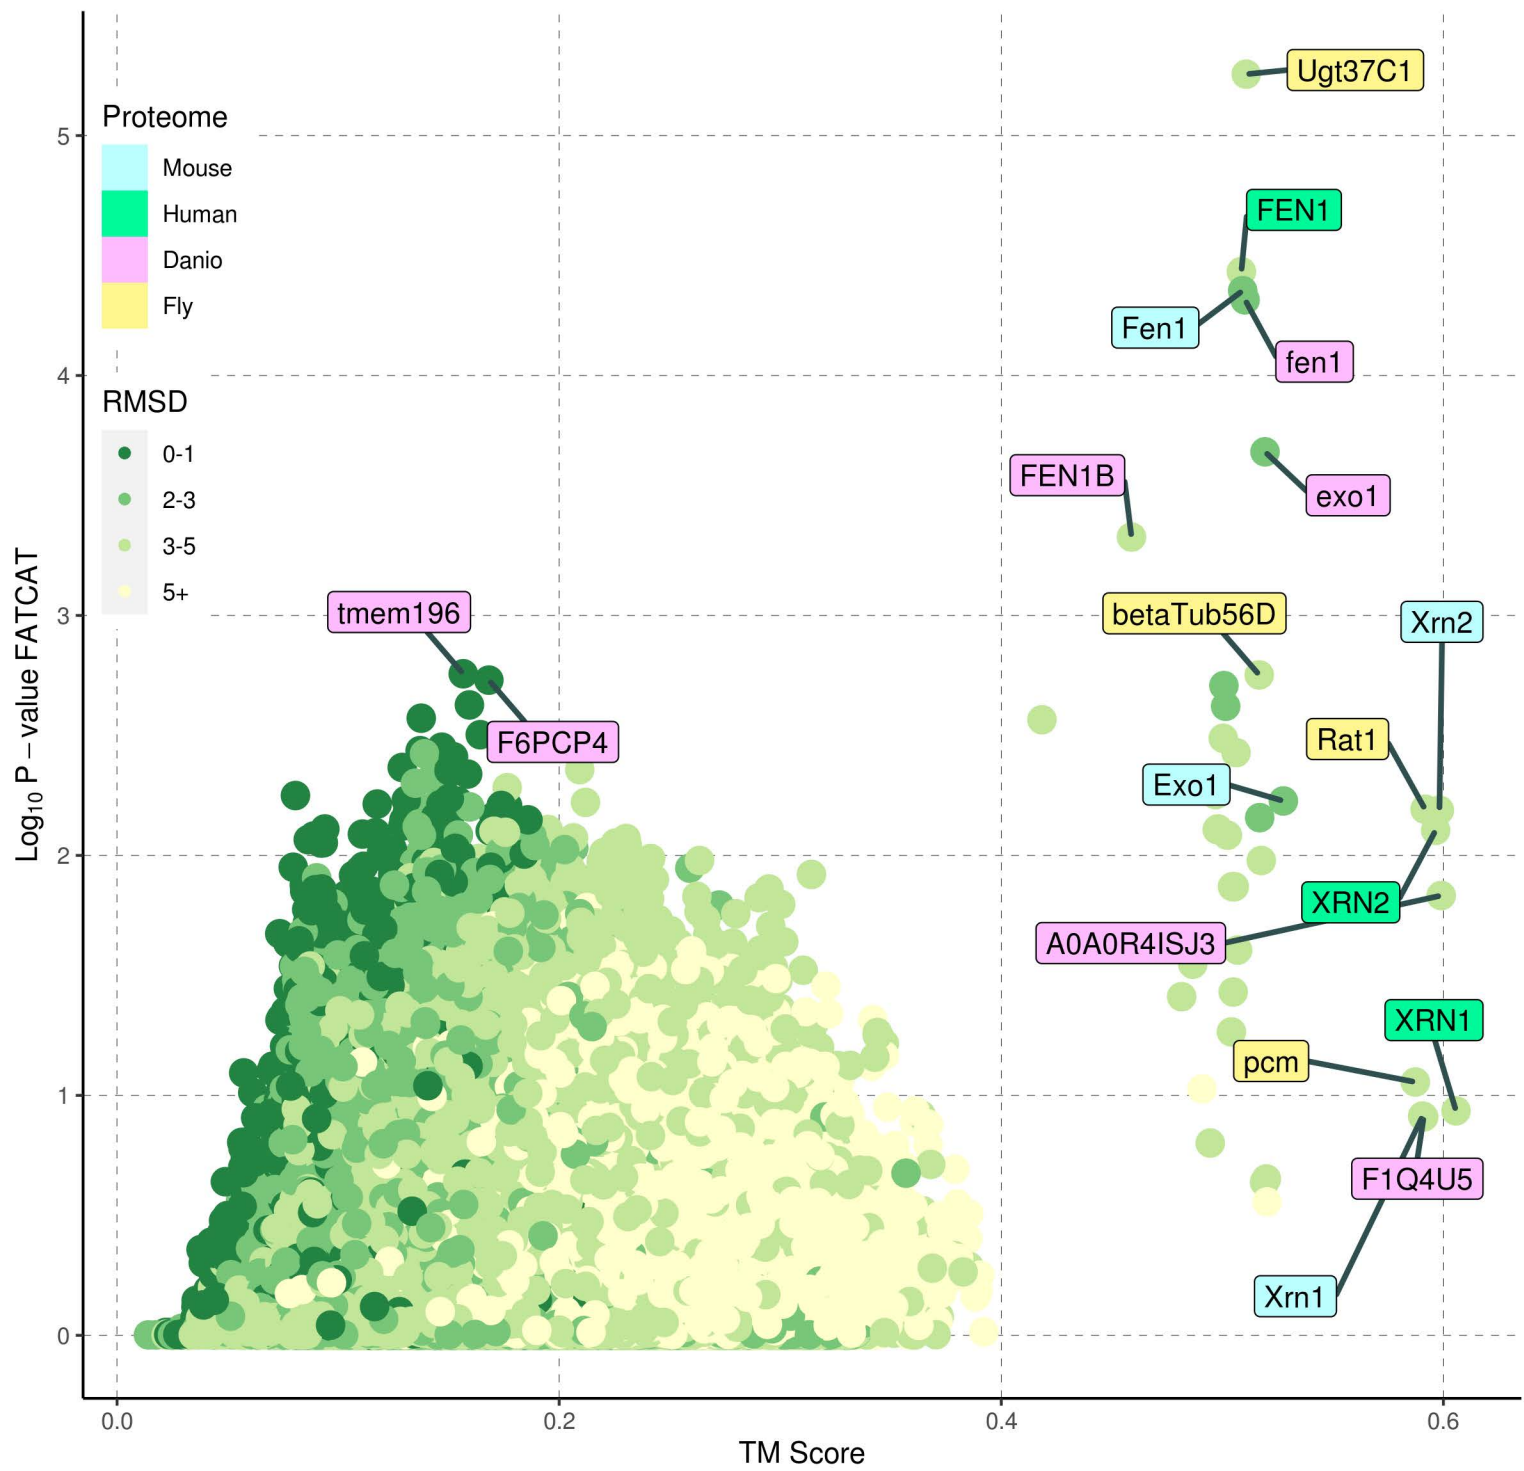



G5p5 : No hits, top-scoring values are indicated

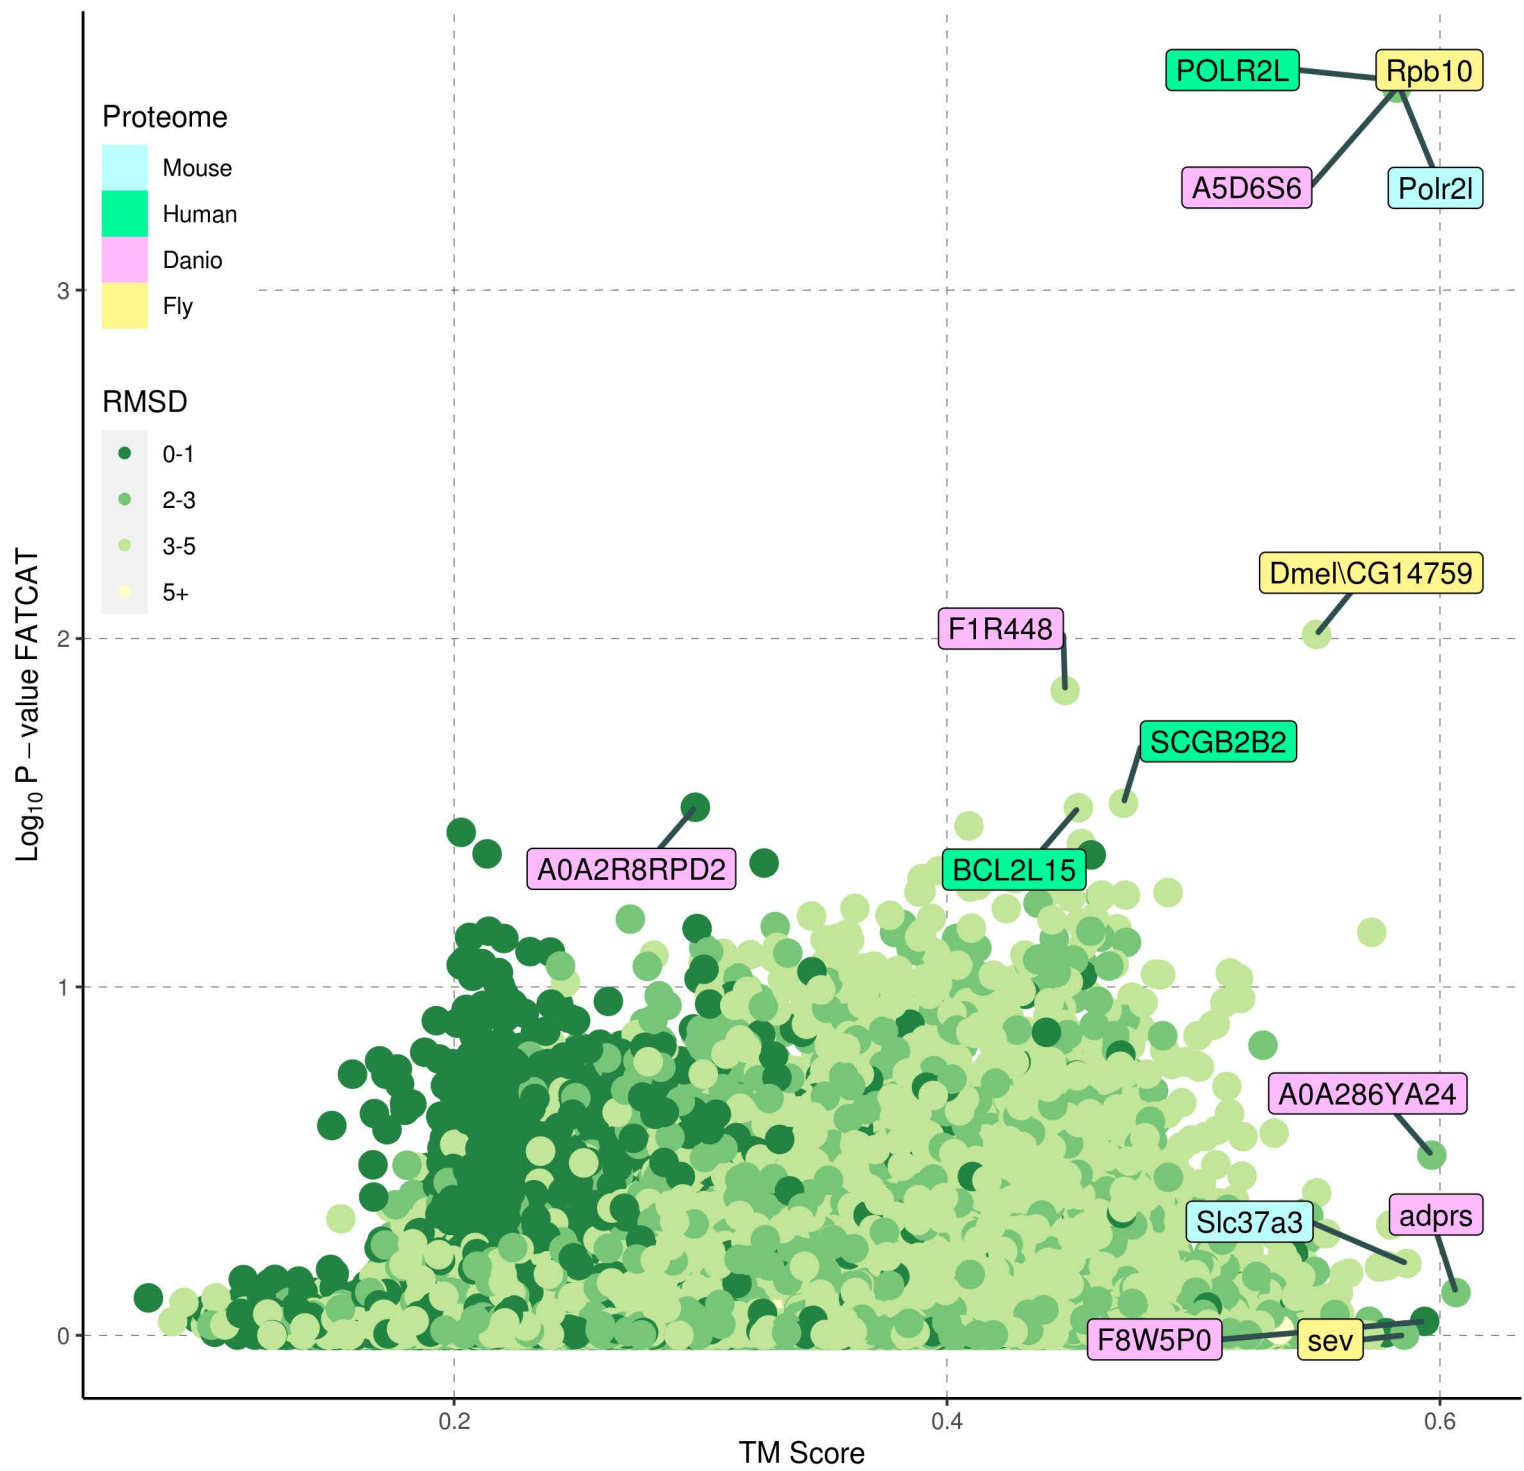

G6 : No hits, top-scoring values are indicated

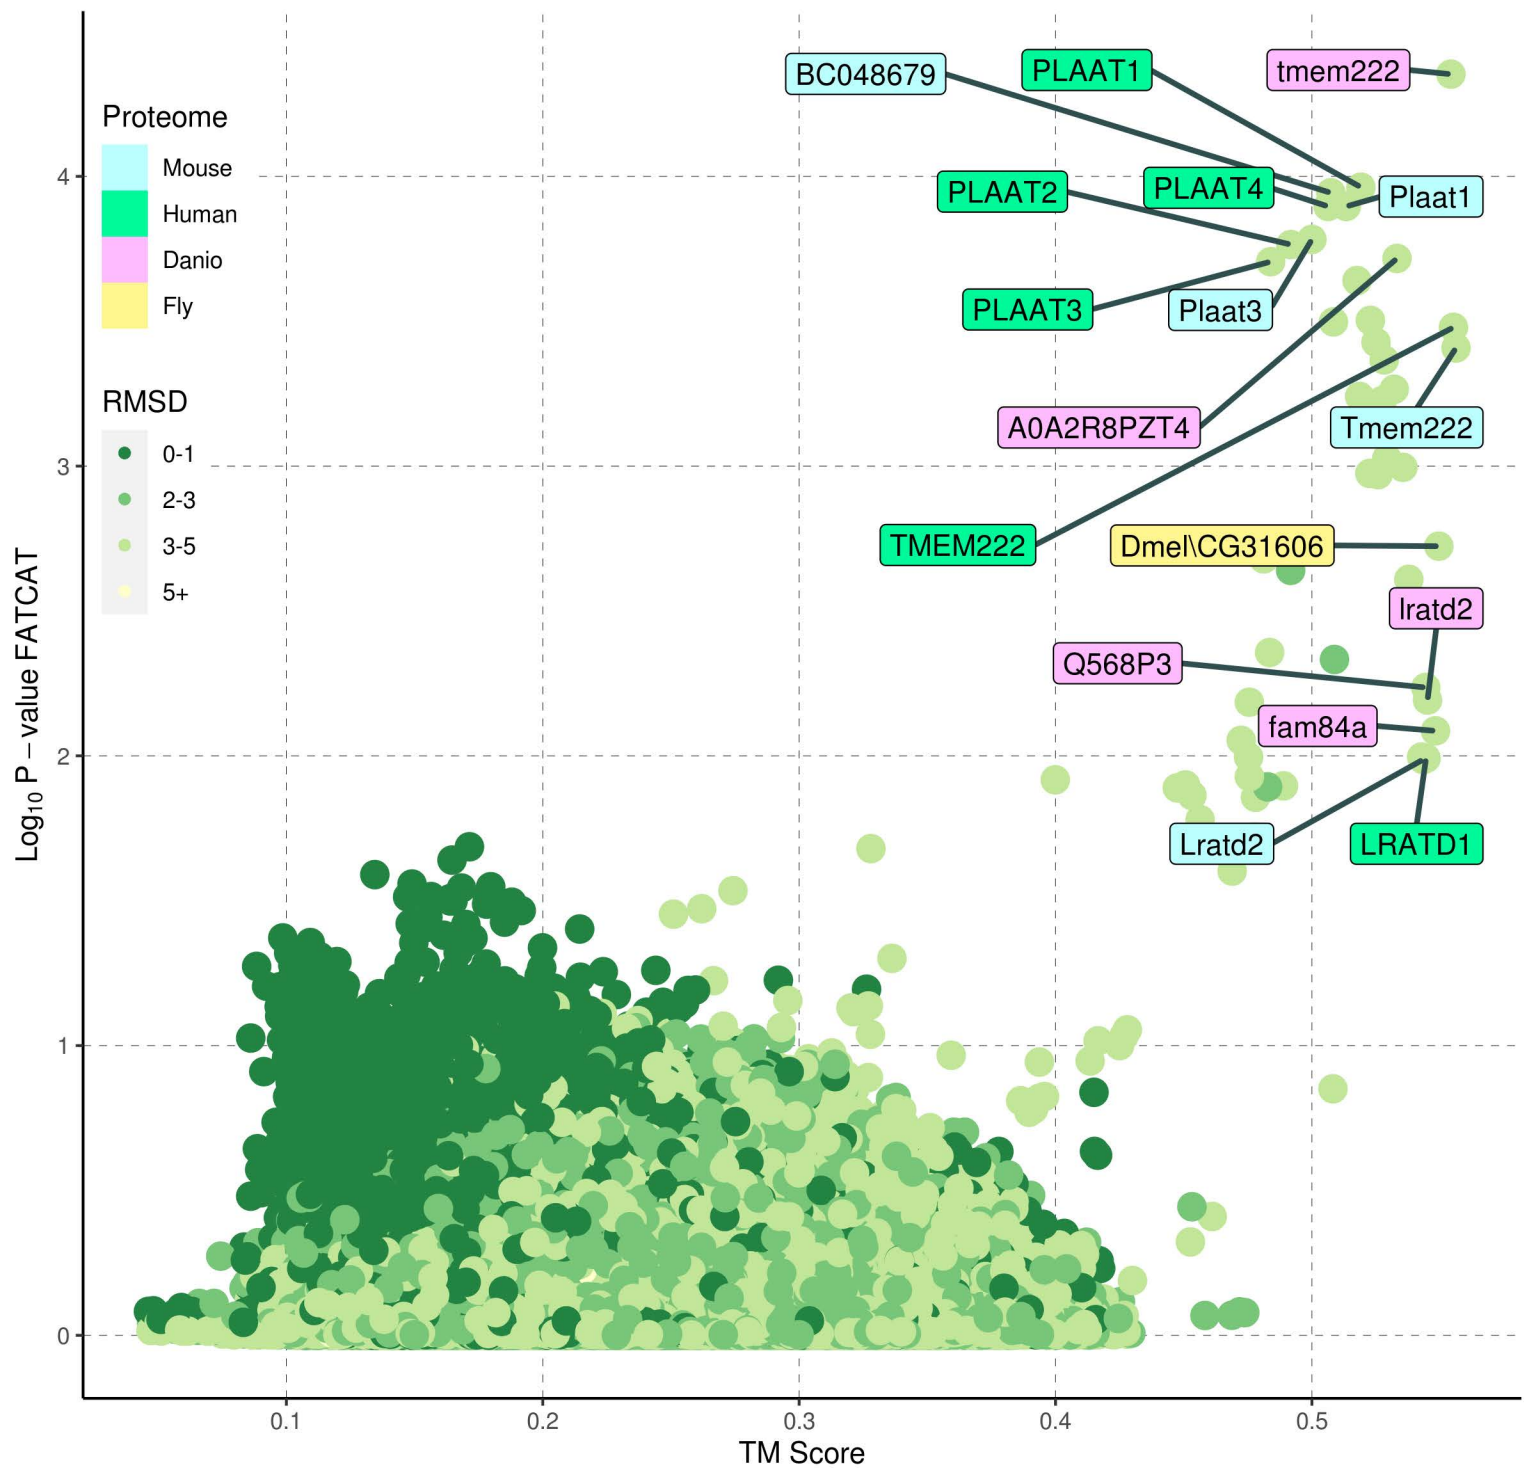

G7 : No hits, top-scoring values are indicated

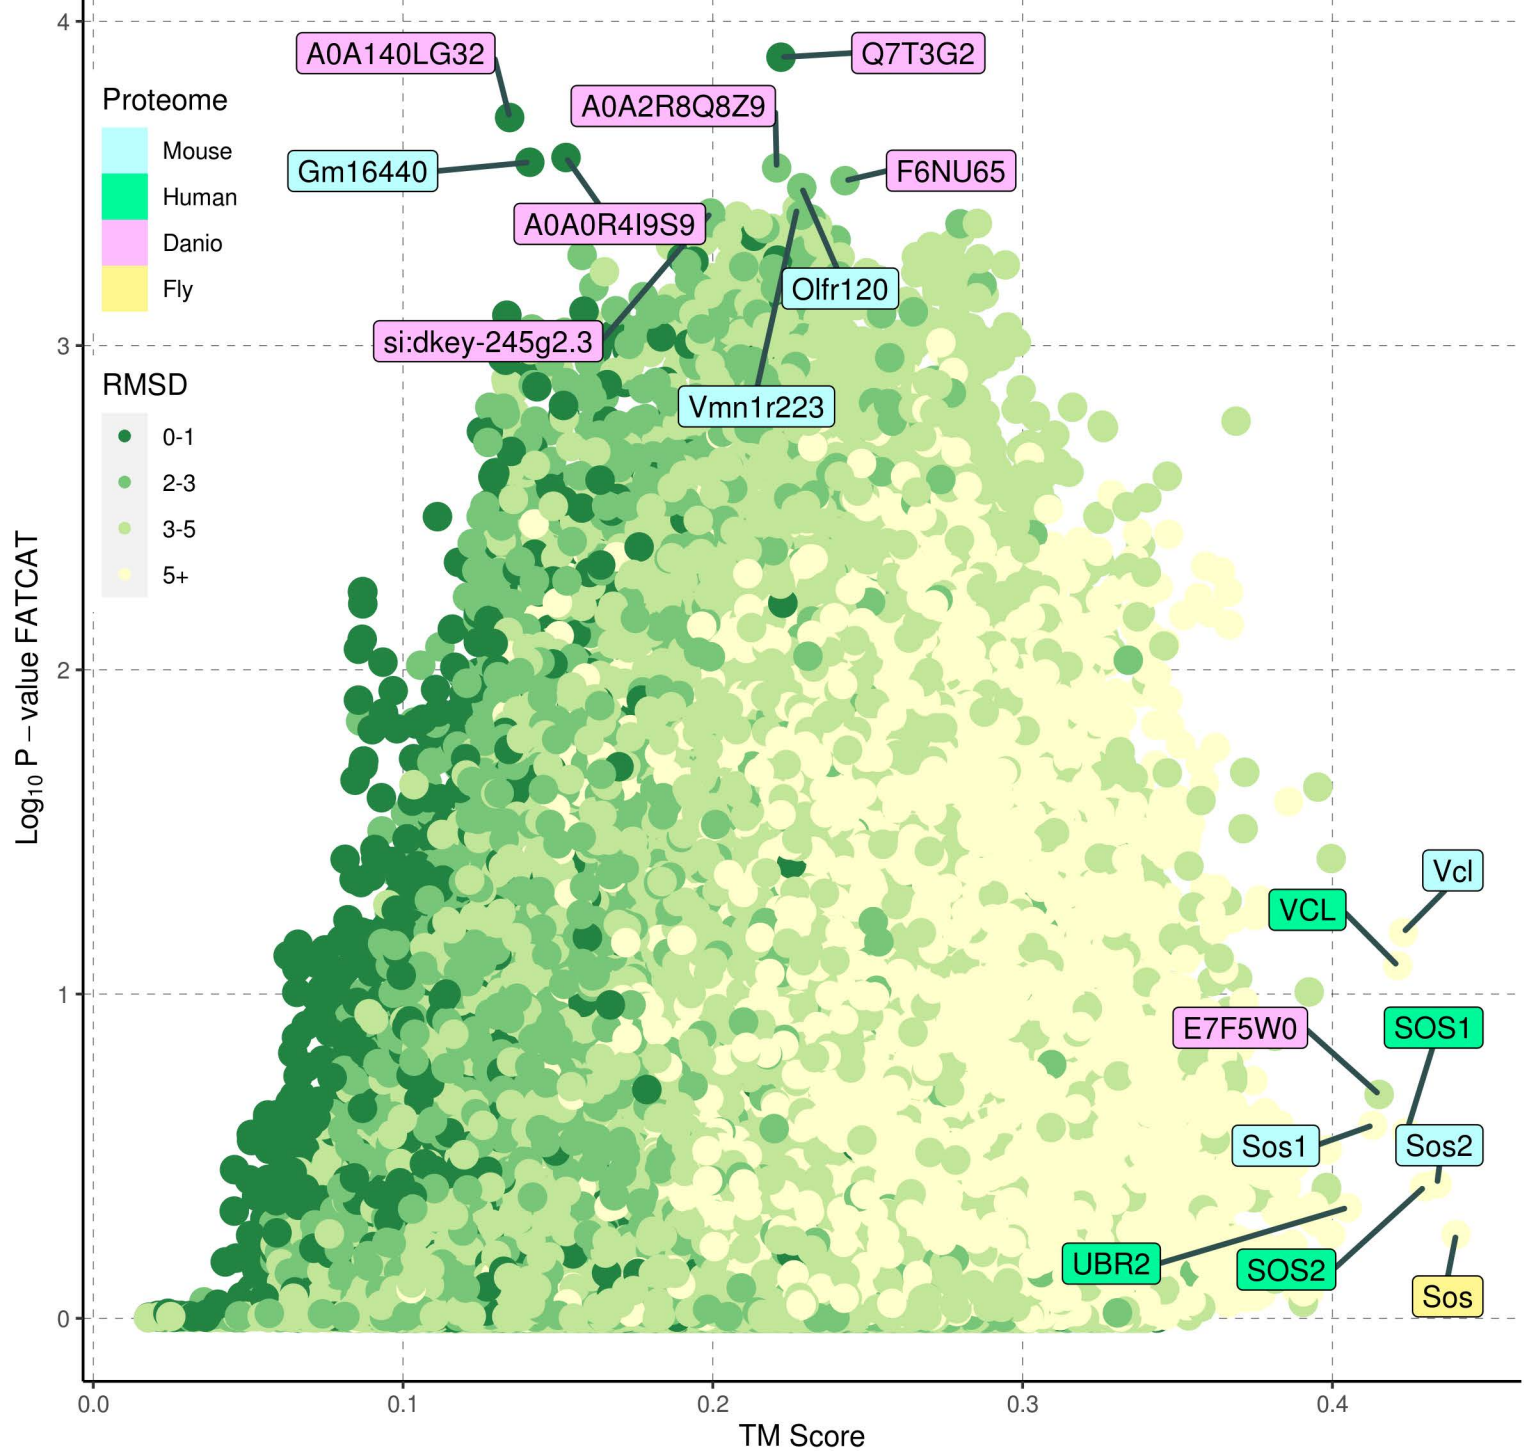

G8

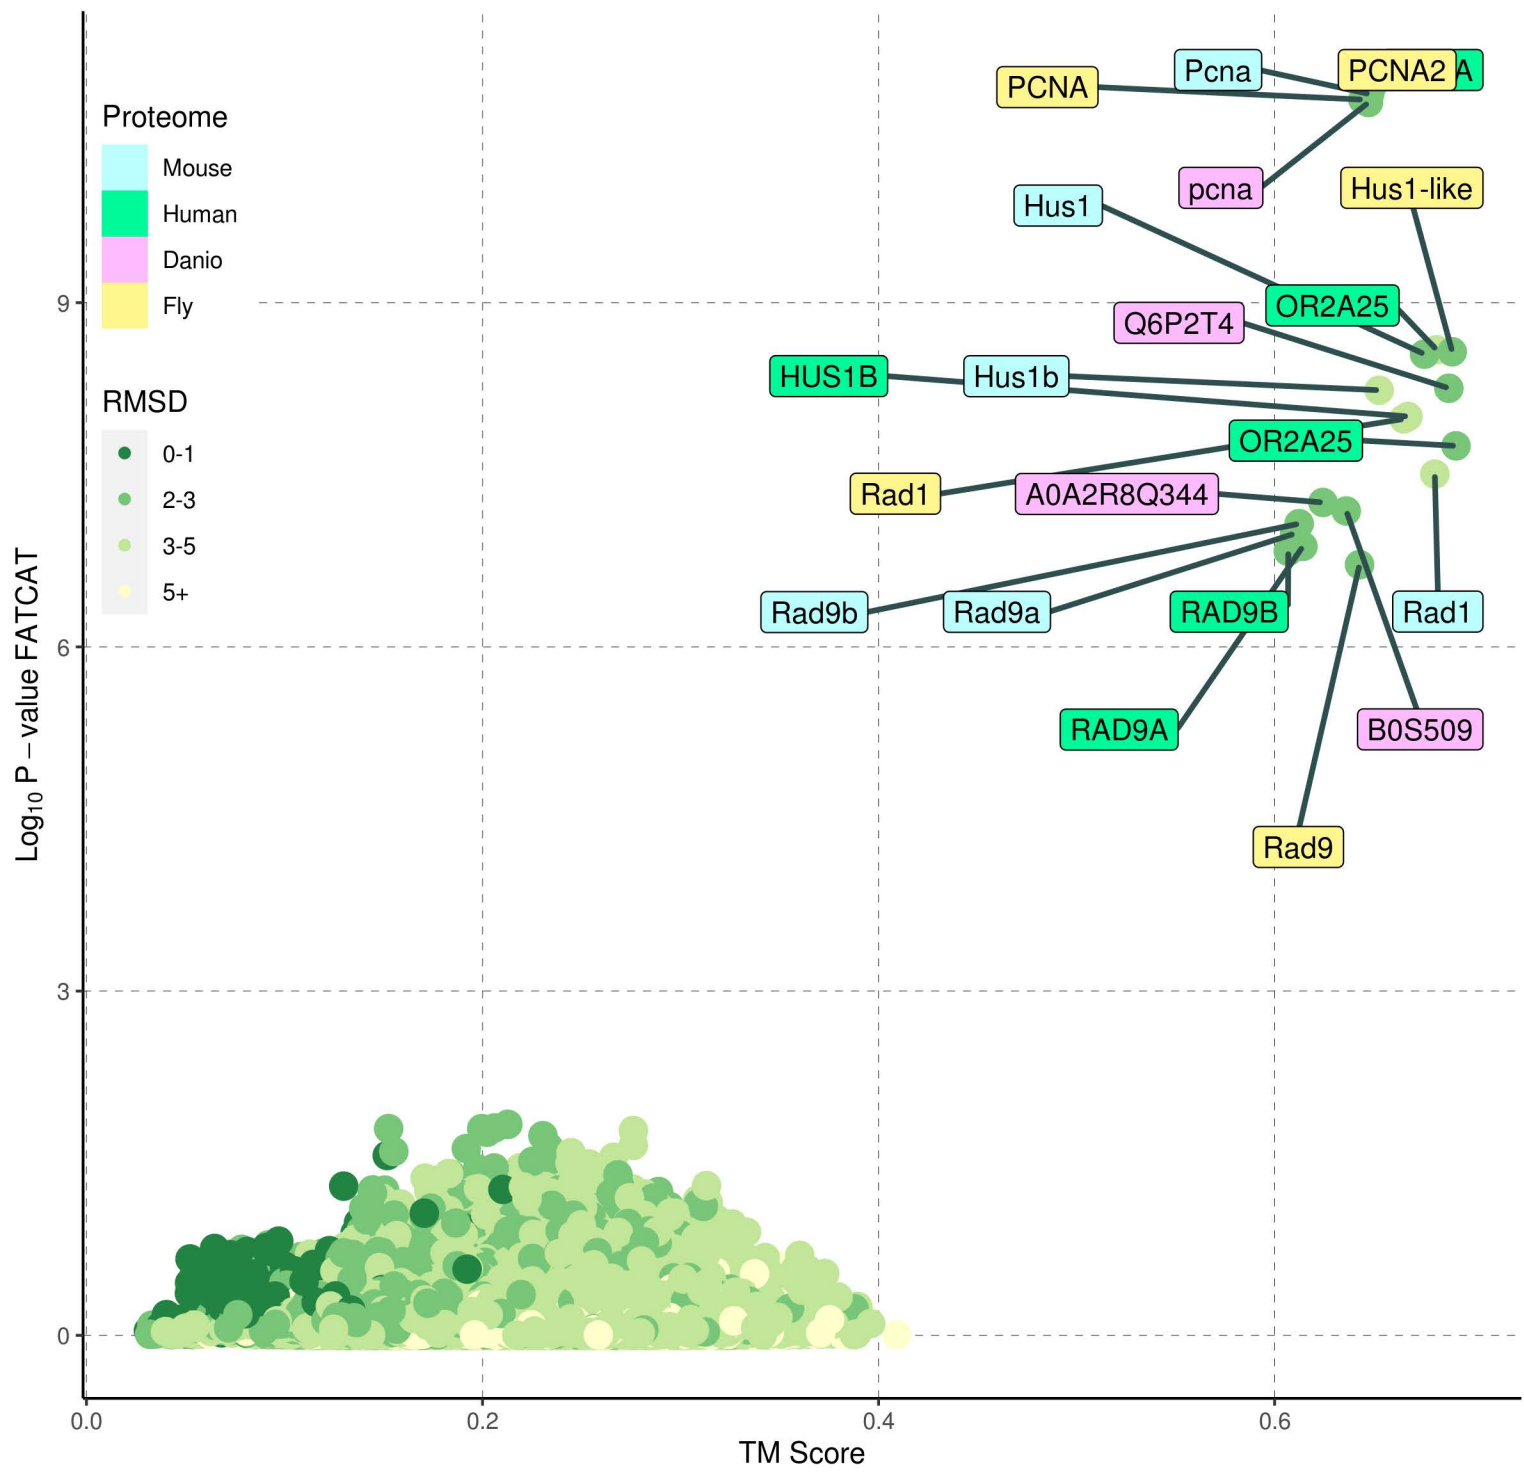

G9 : No hits, top-scoring values are indicated

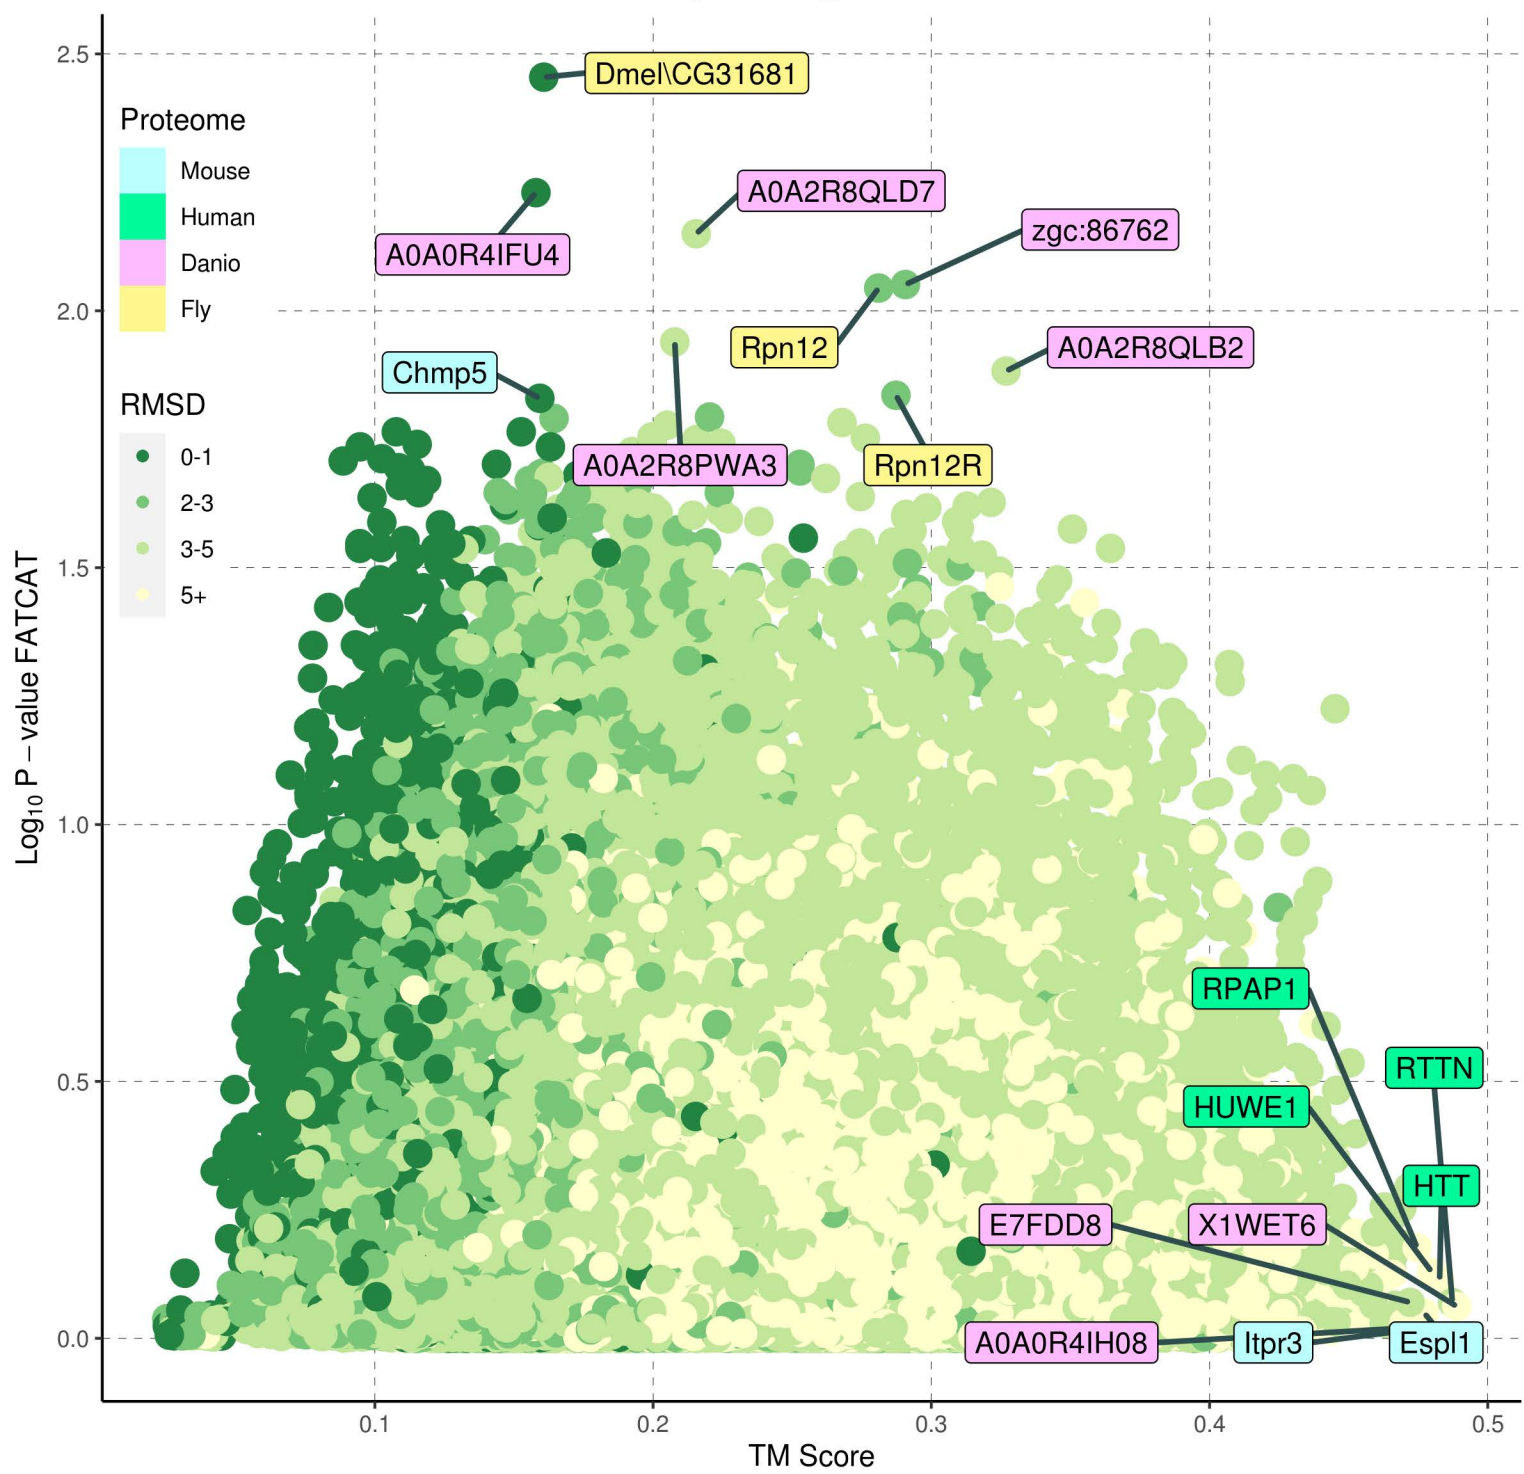

GorfA : No hits, top-scoring values are indicated

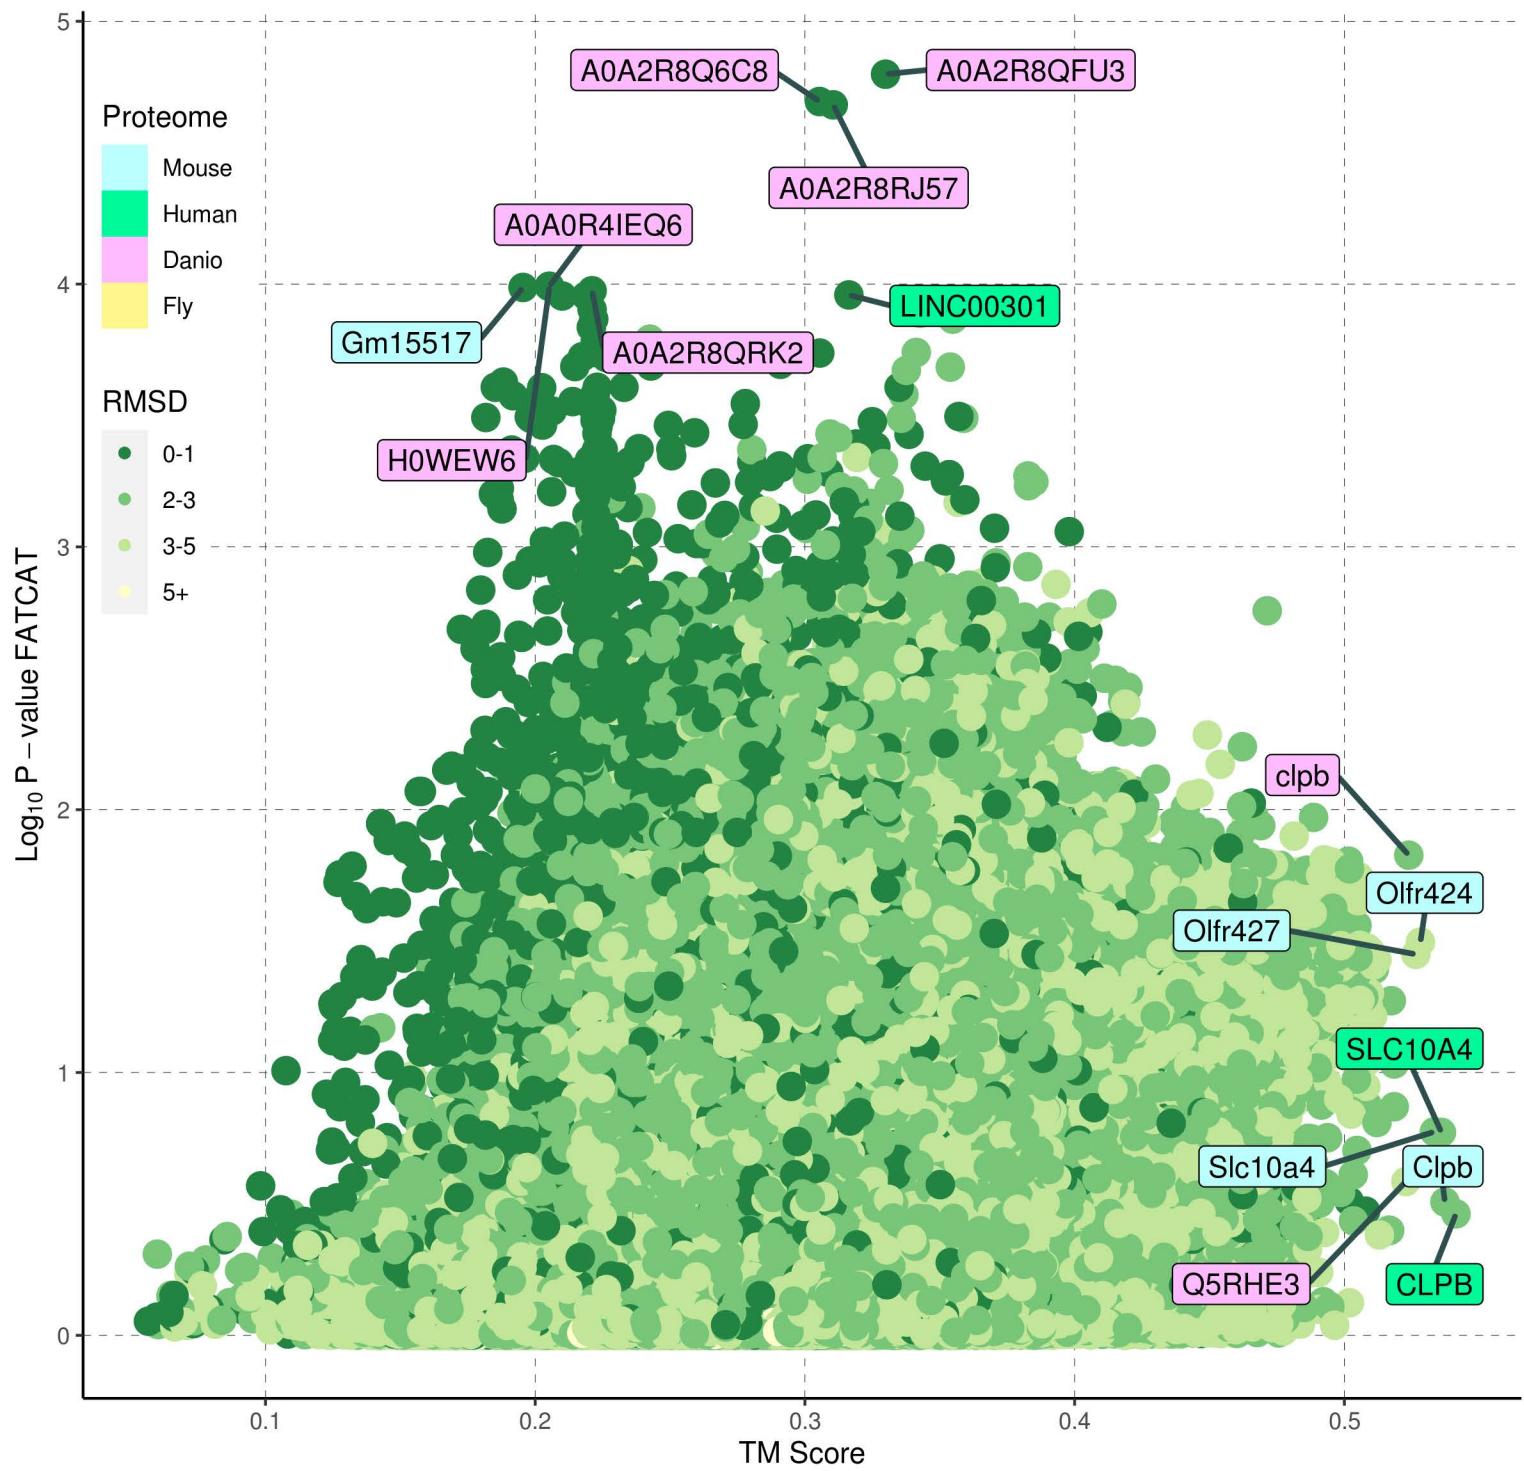

# GorfB

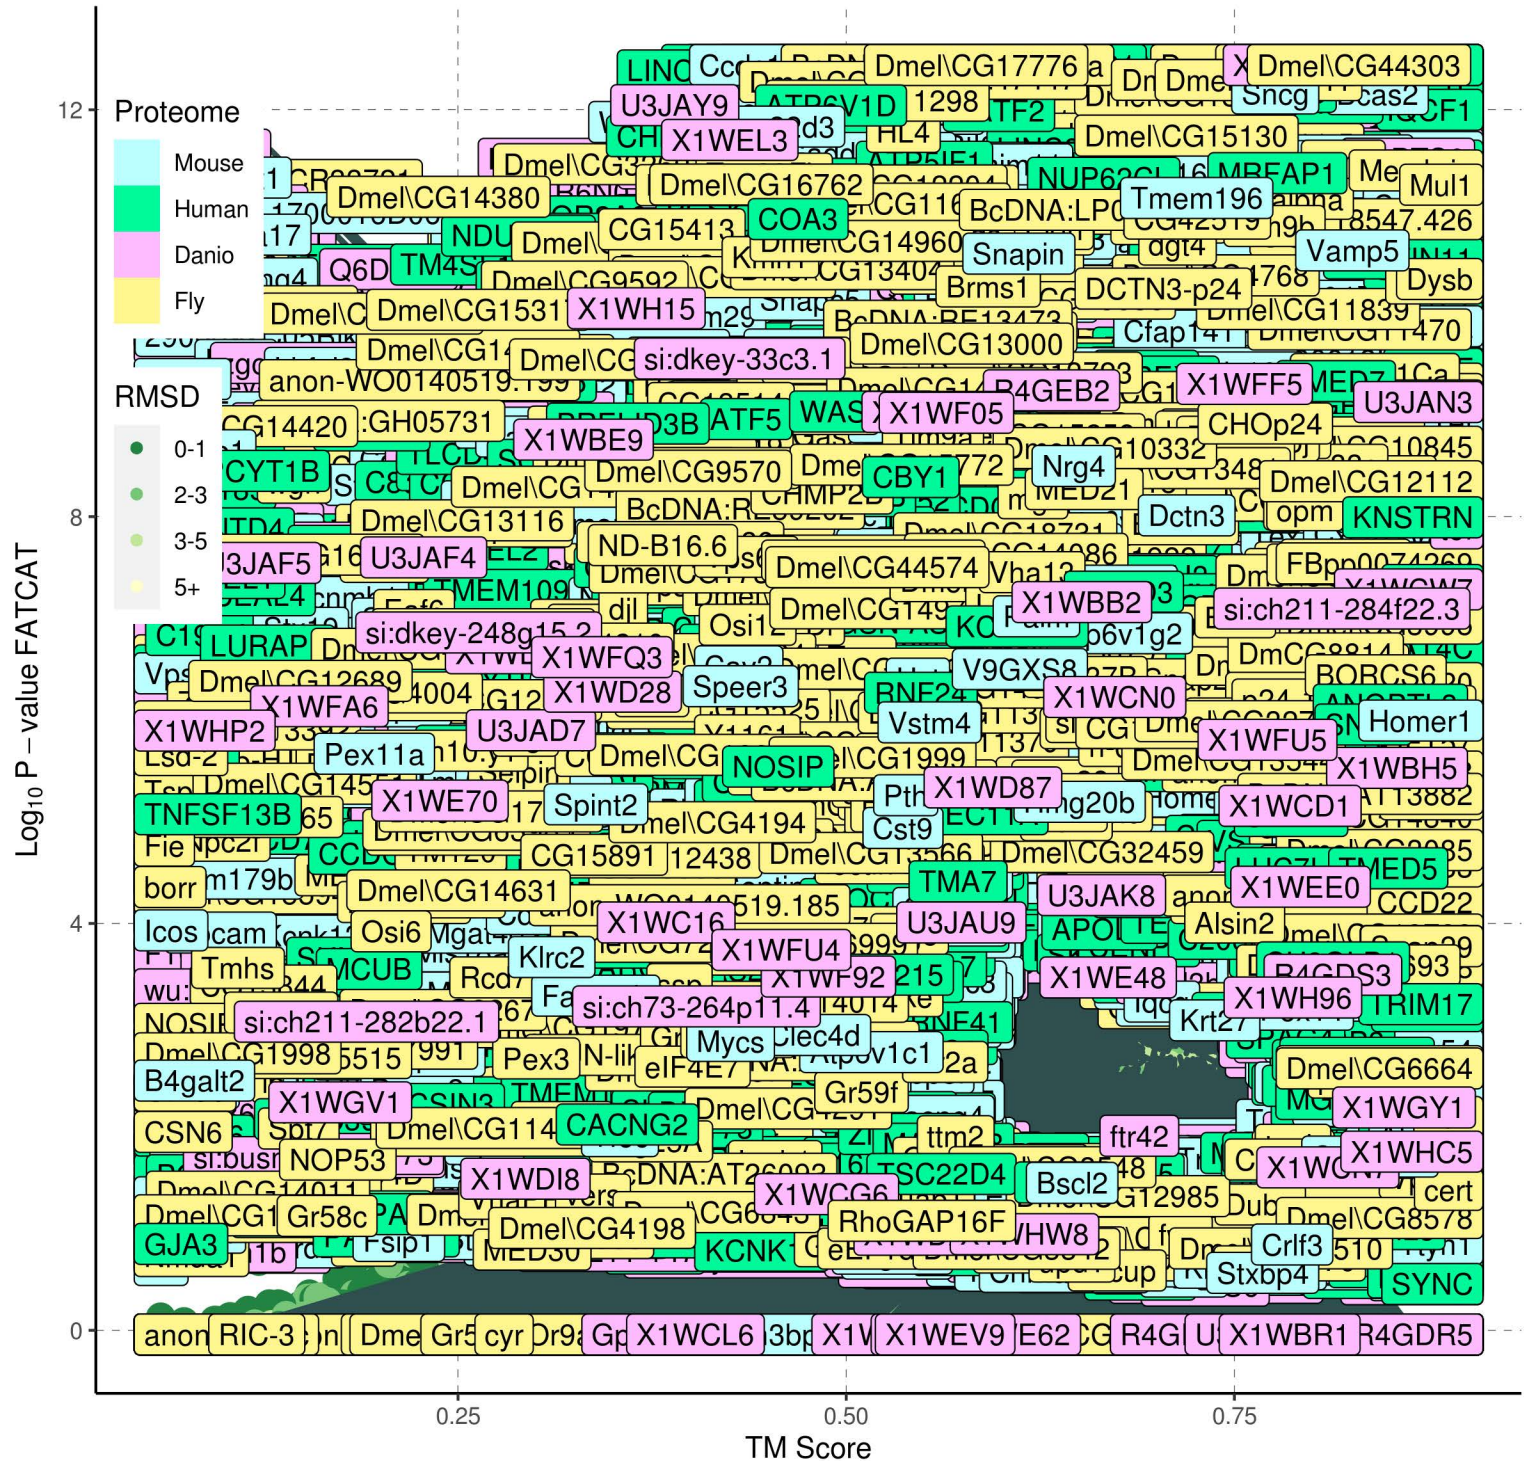

# H1

Log<sub>10</sub> P-value FATCAT

10

5

0

0.2

TM Score

0.6

0.8

## Proteome

- Mouse
- Human
- Danio
- Fly

## RMSD

- 0-1
- 2-3
- 3-5
- 5+

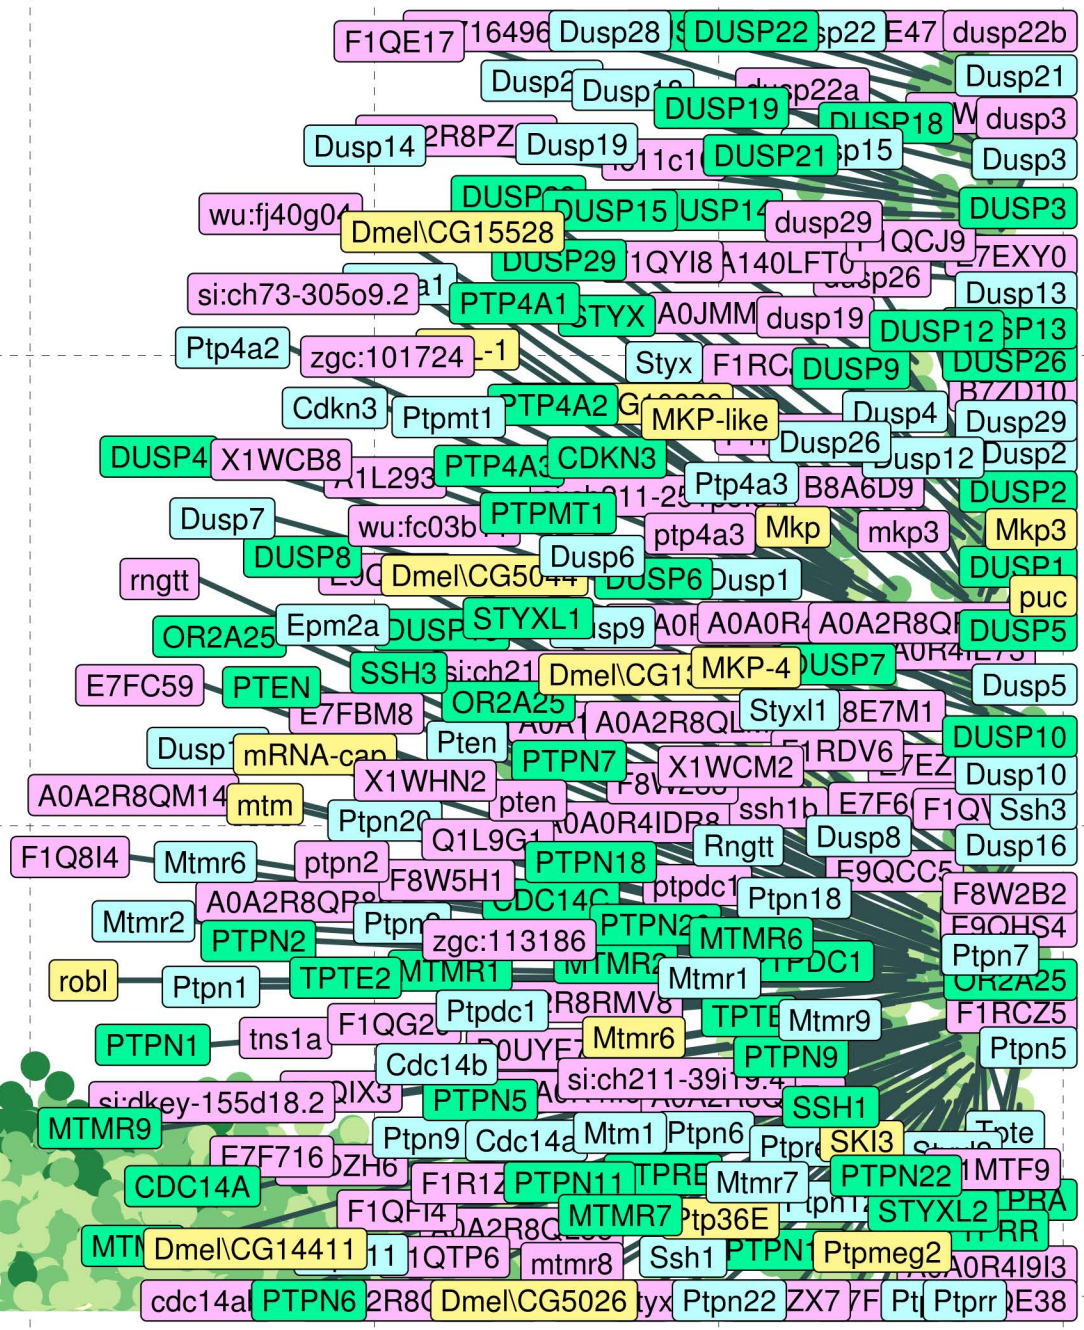



## H2 : No hits, top-scoring values are indicated

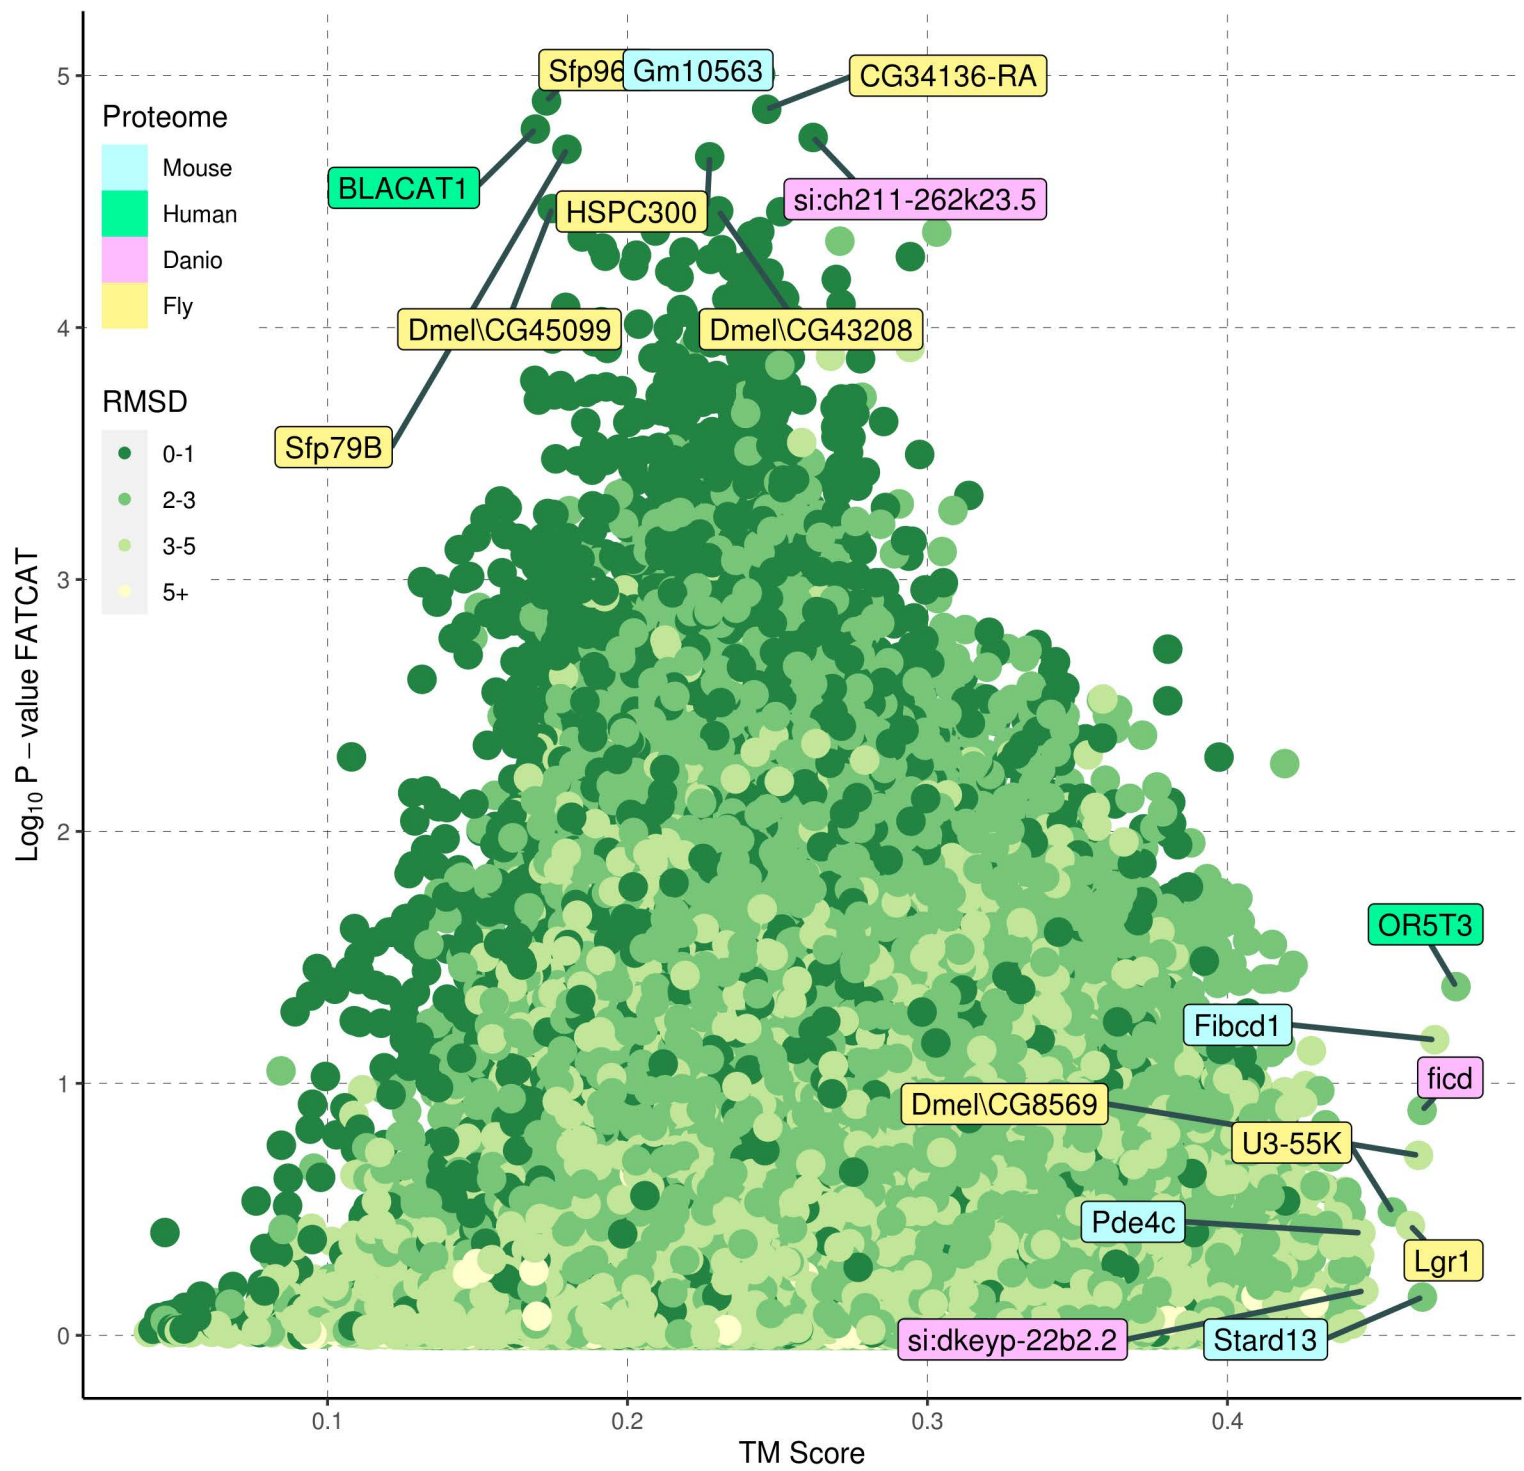

### H3 : No hits, top-scoring values are indicated

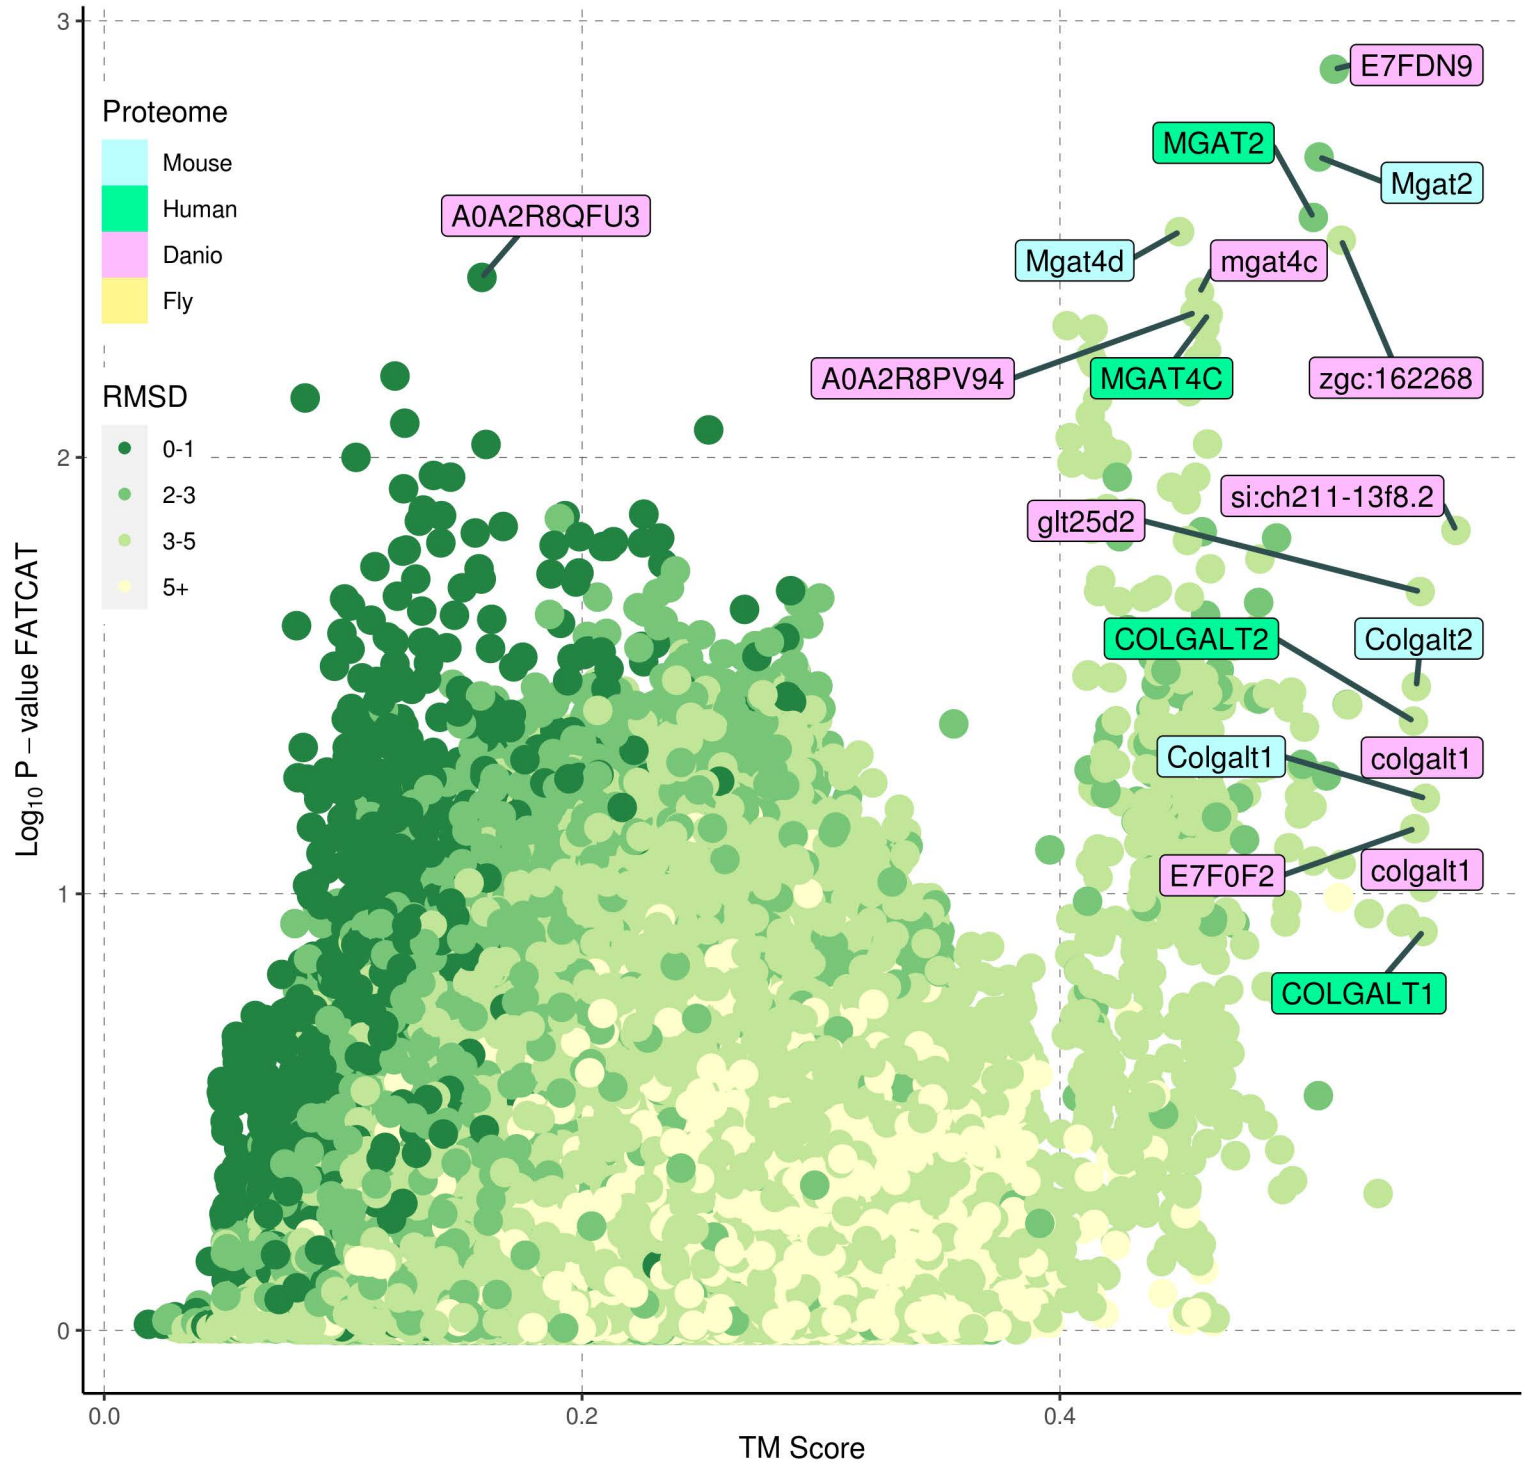

# H4 : No hits, top-scoring values are indicated

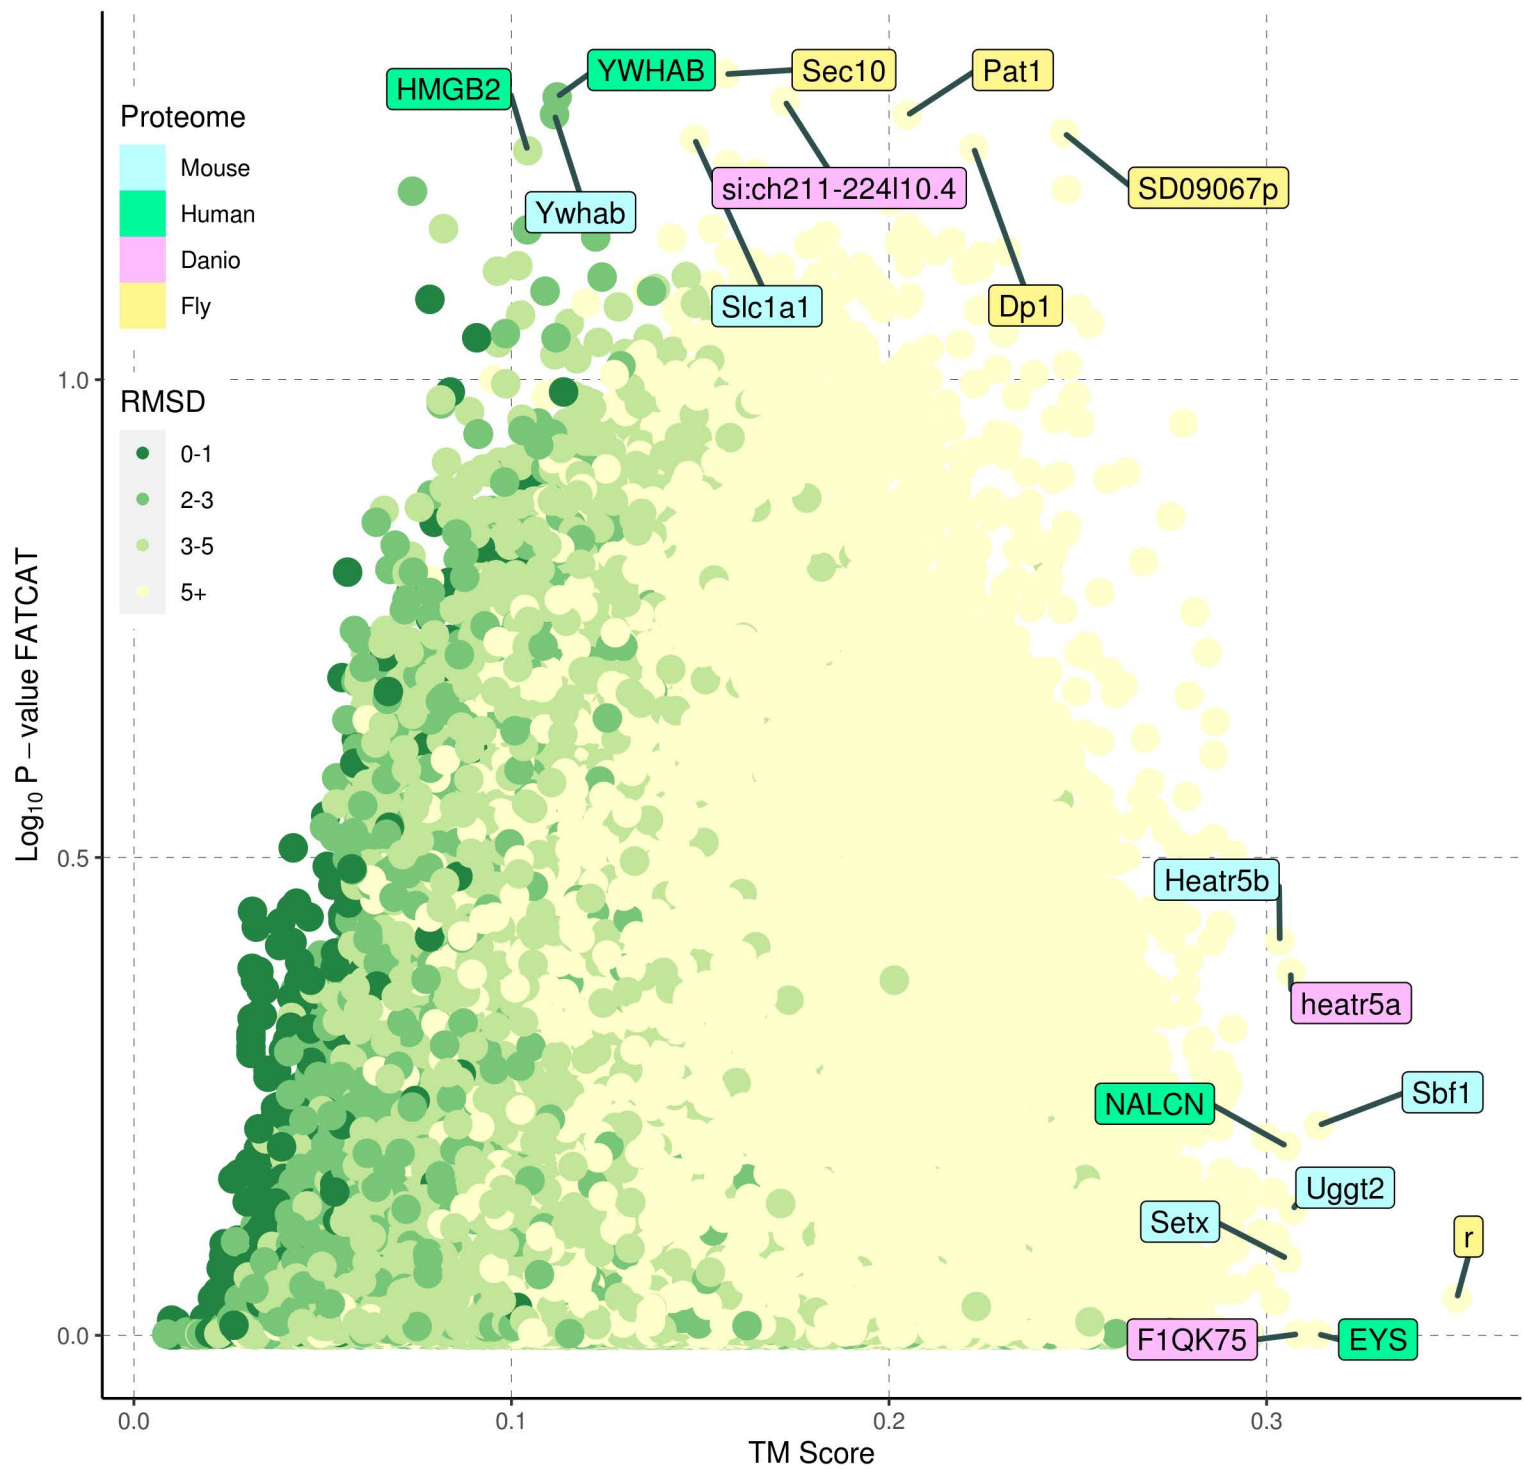

# H5 : No hits, top-scoring values are indicated

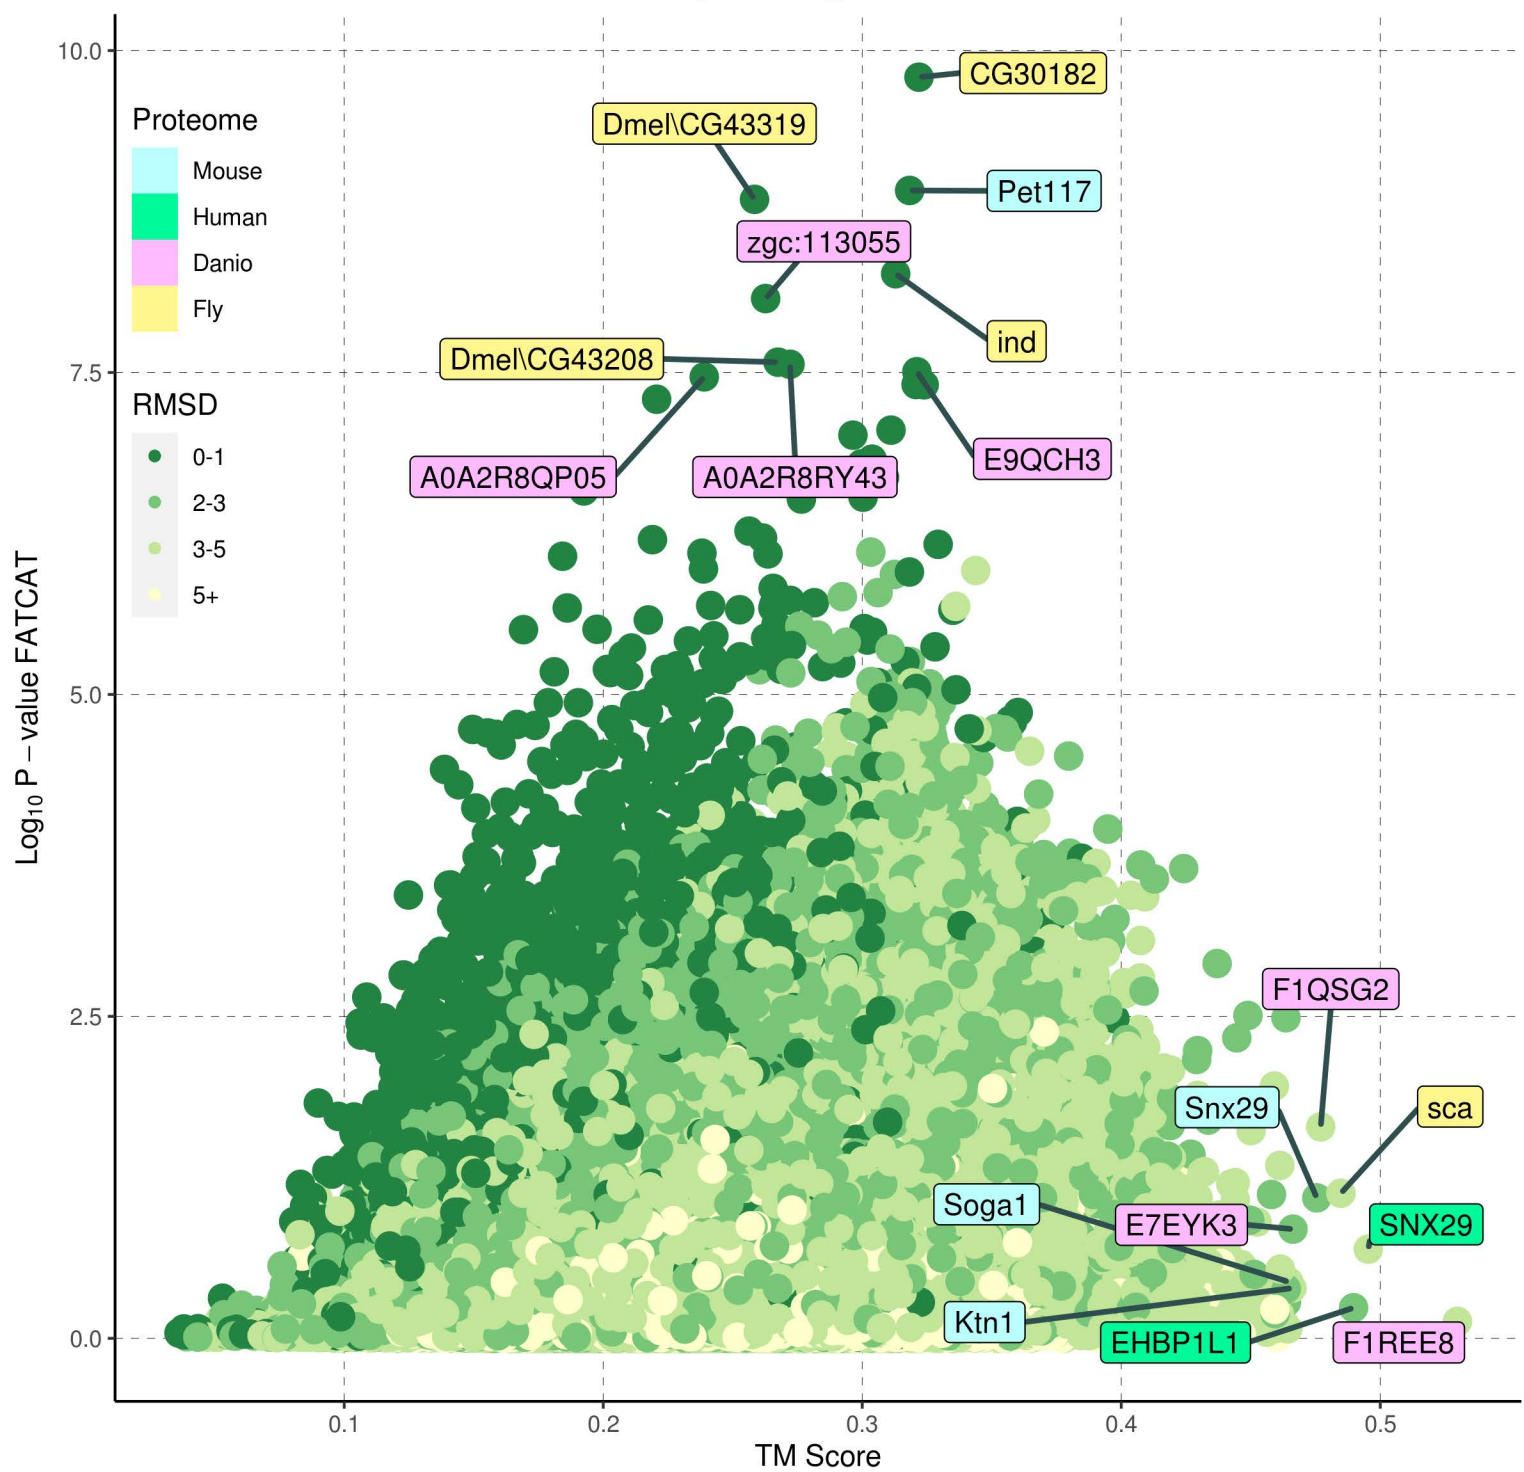

## H6

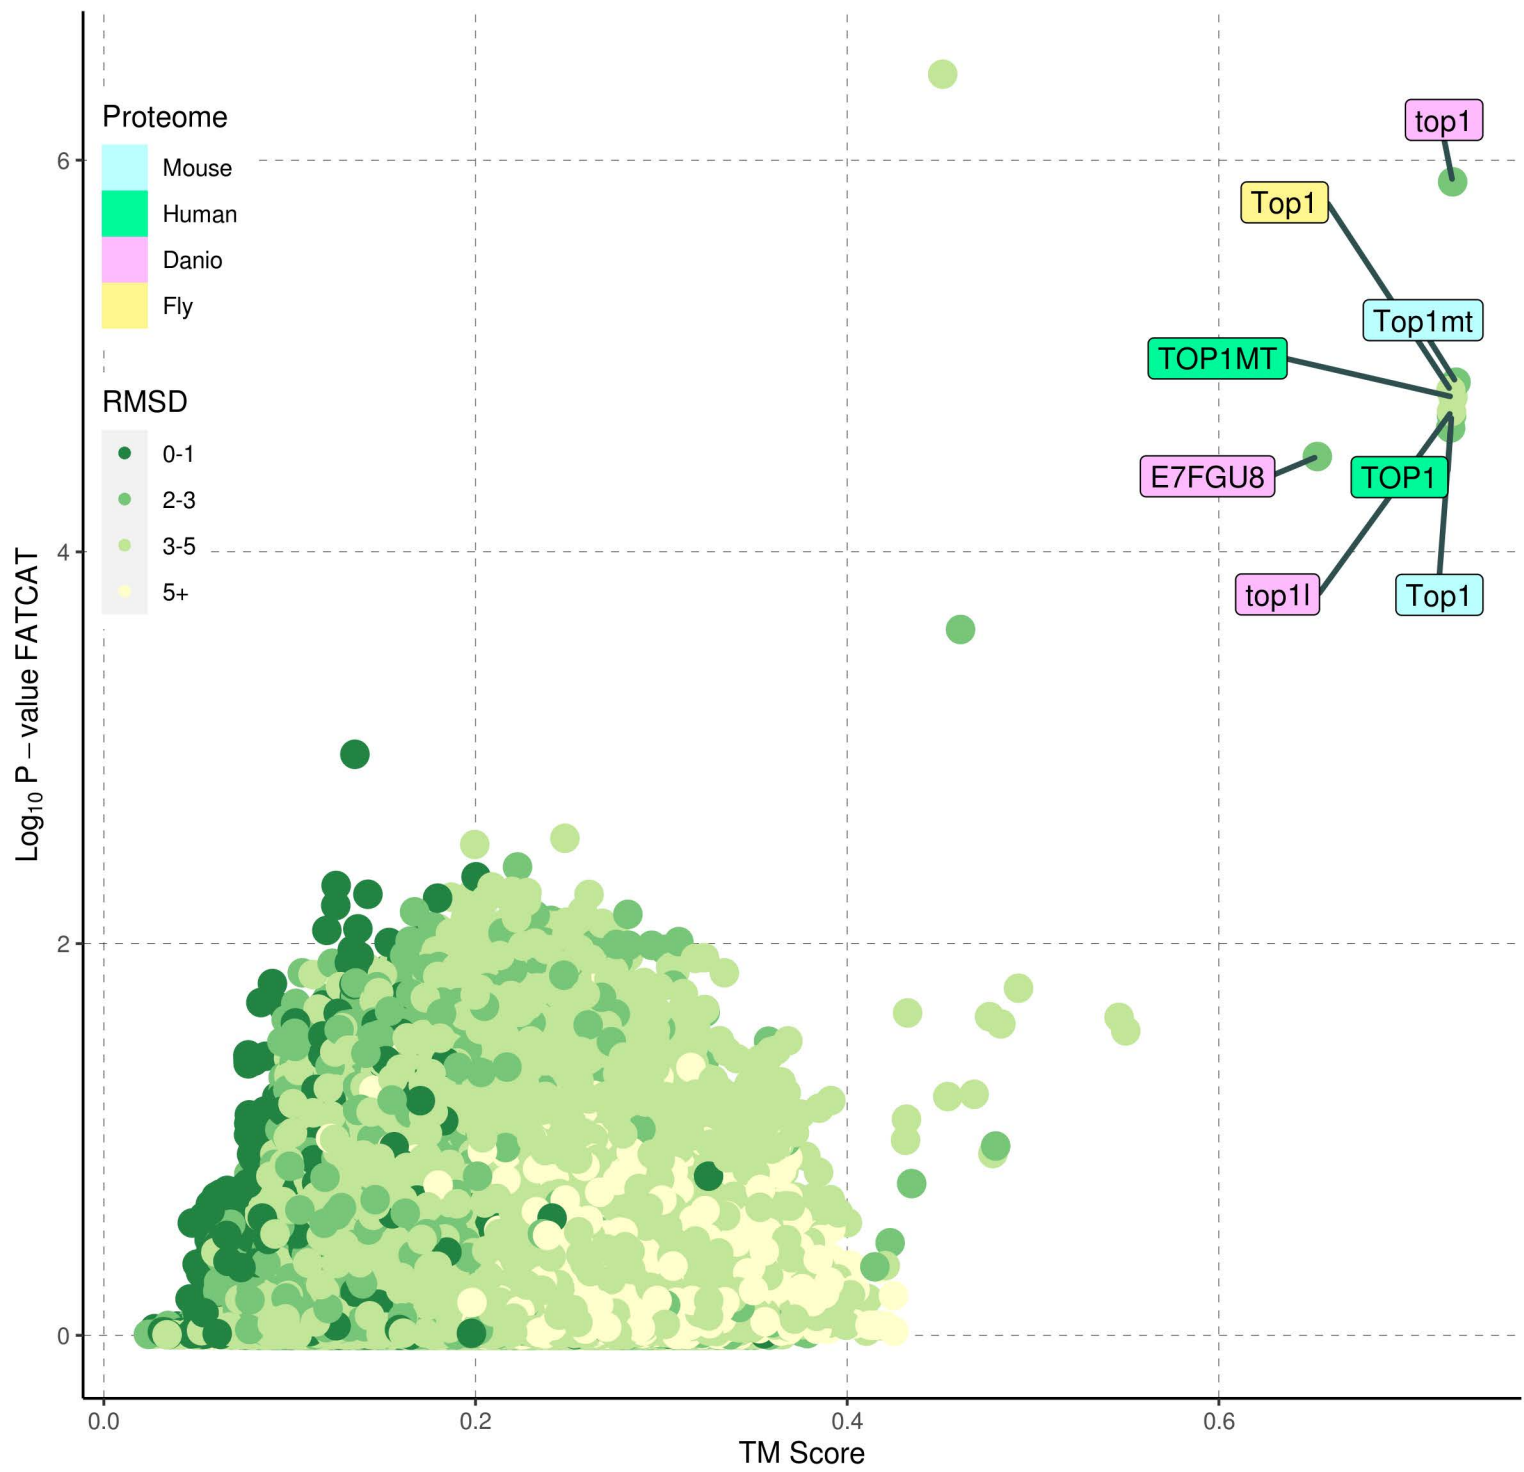

H7 : No hits, top-scoring values are indicated

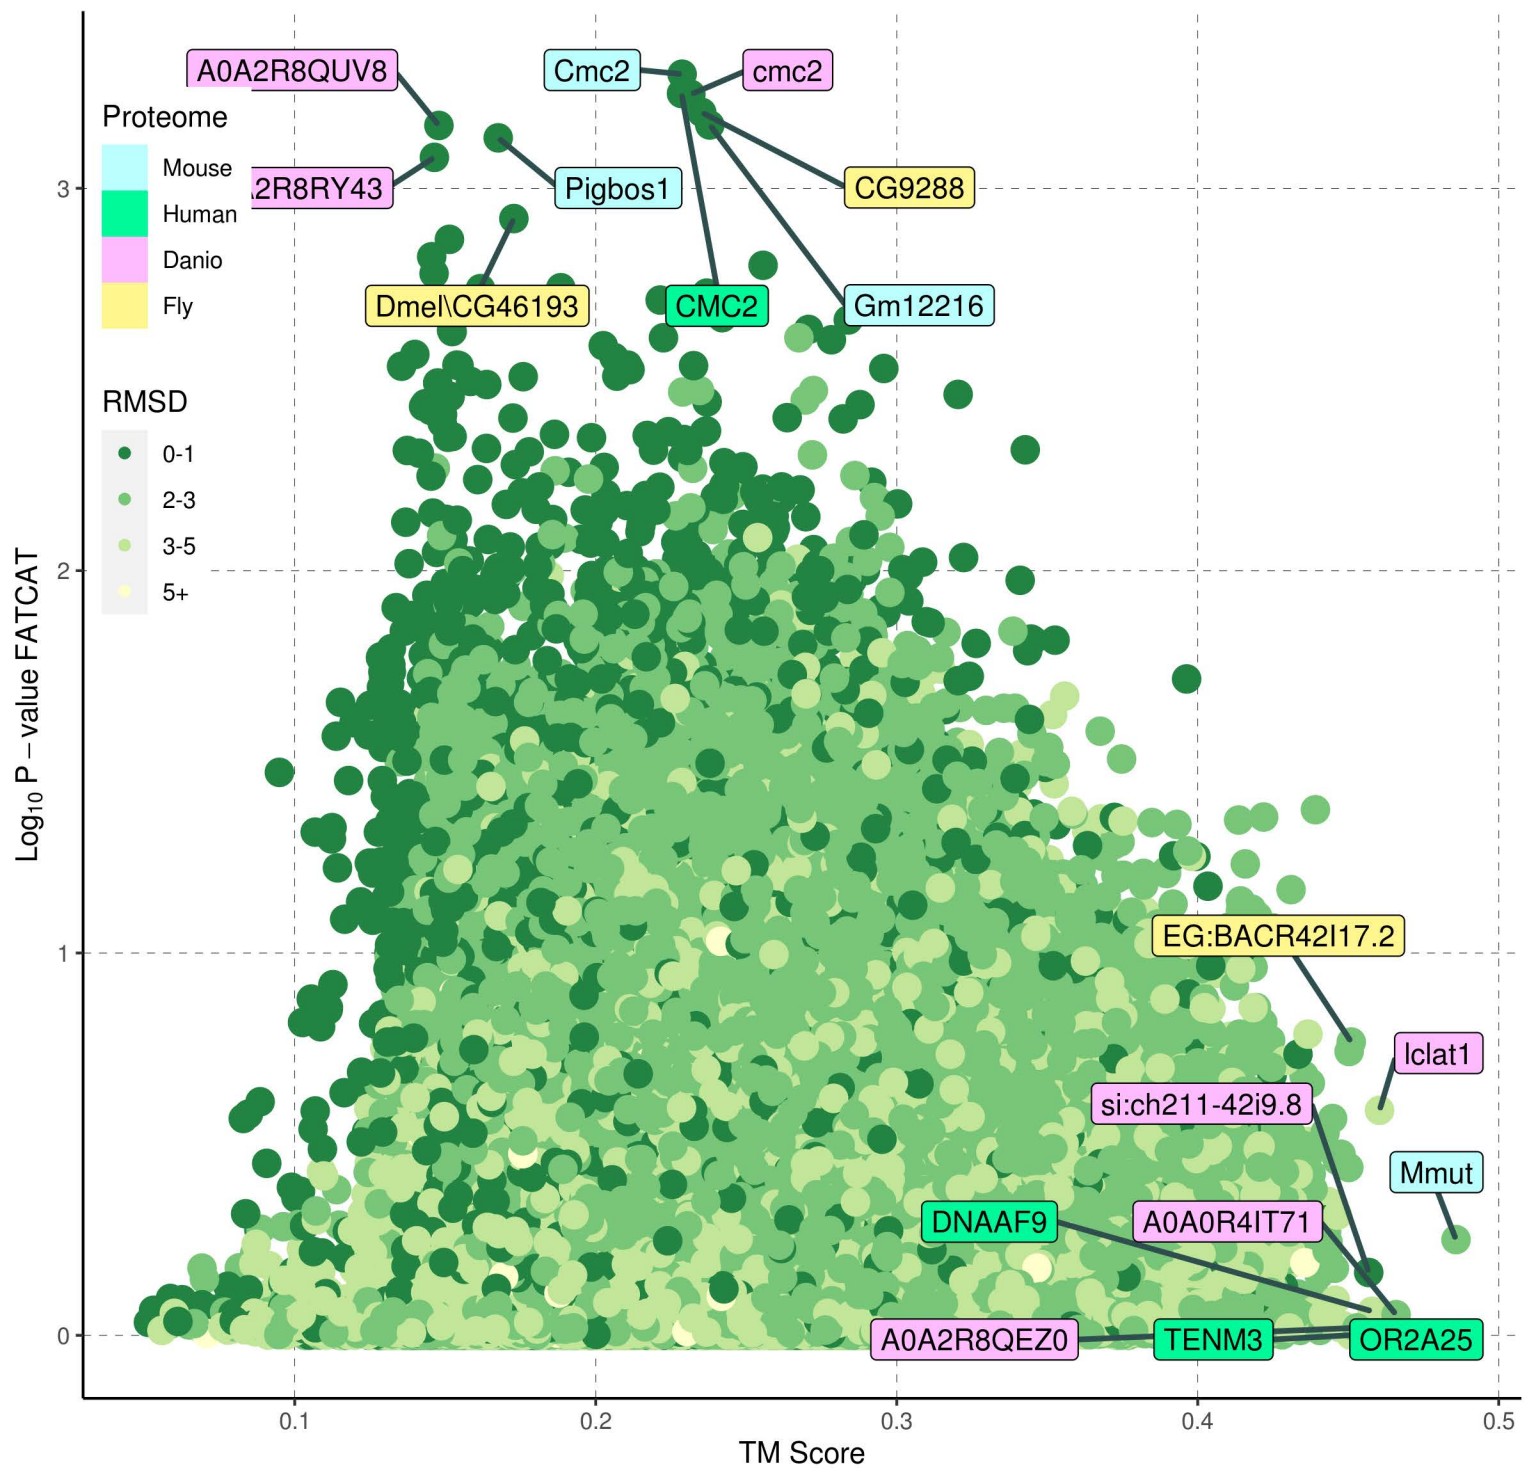

# HorfA

Log<sub>10</sub> P - value FATCAT

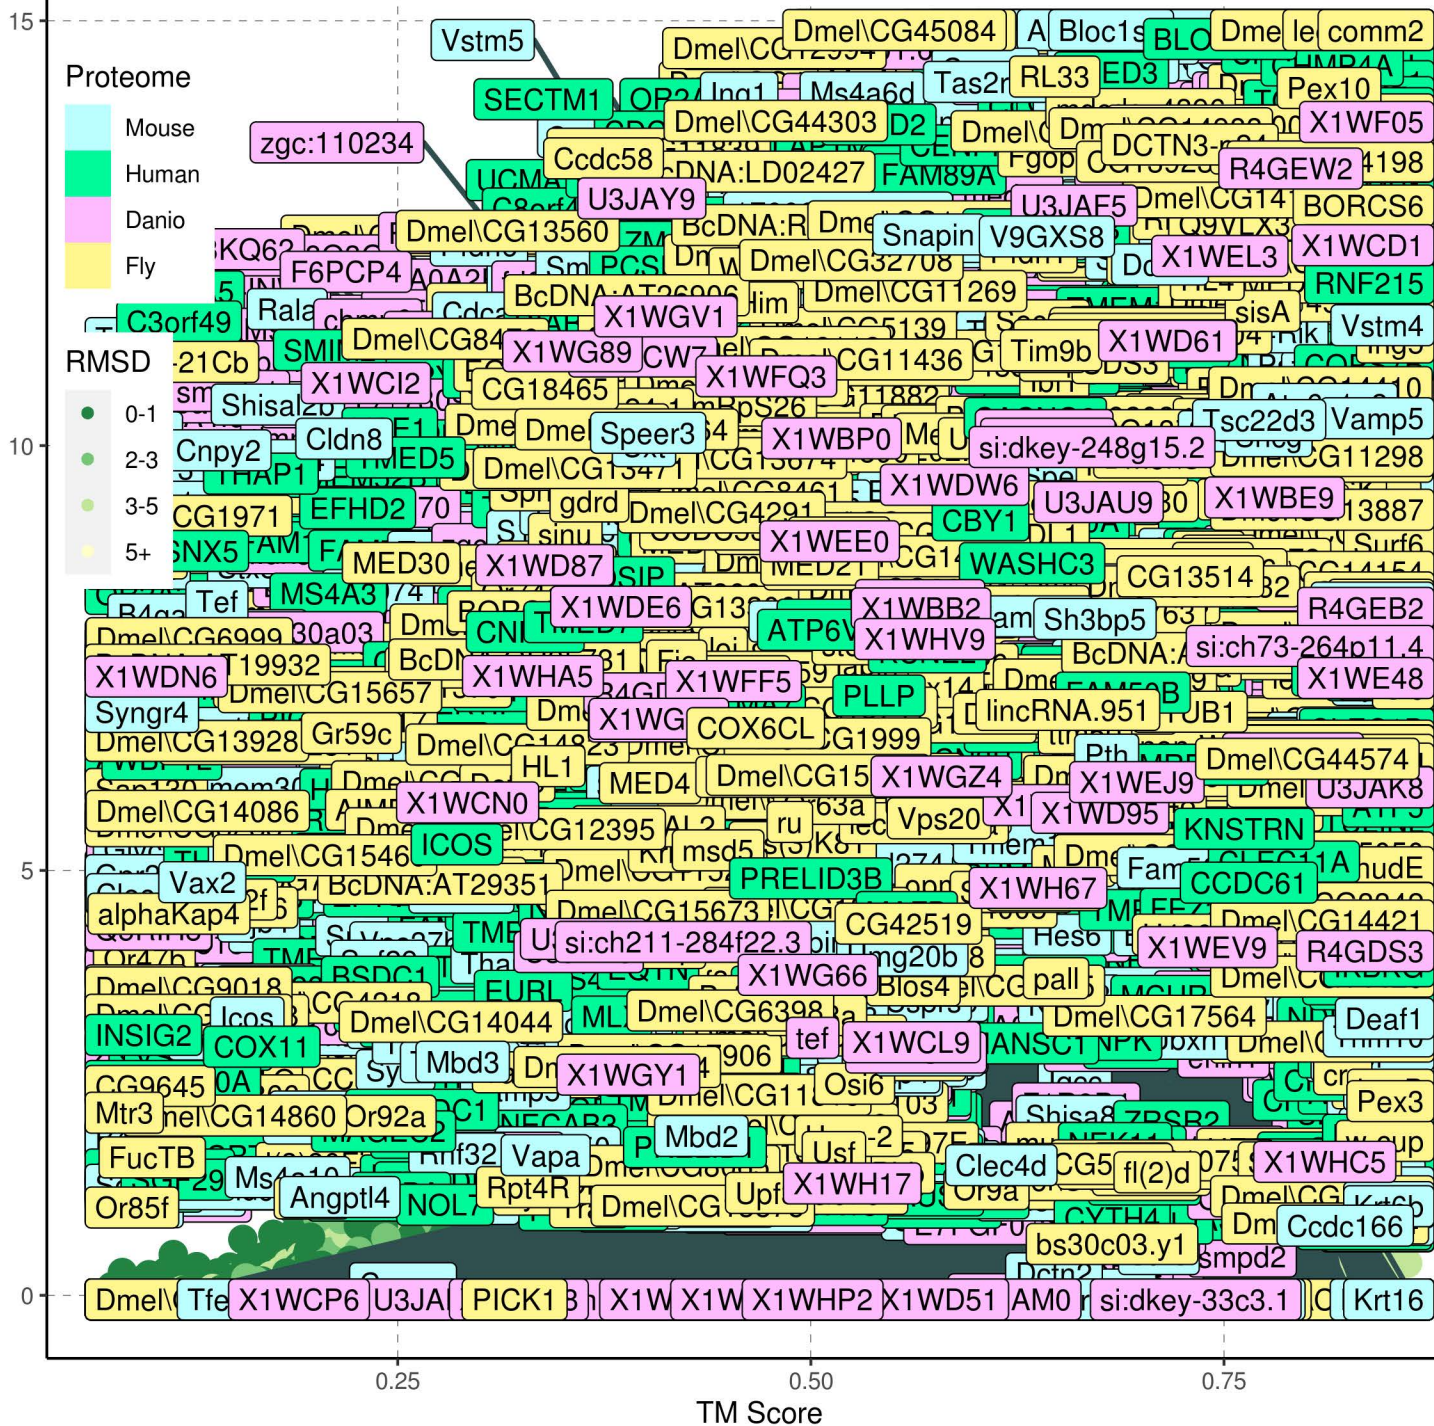

I1 : No hits, top-scoring values are indicated

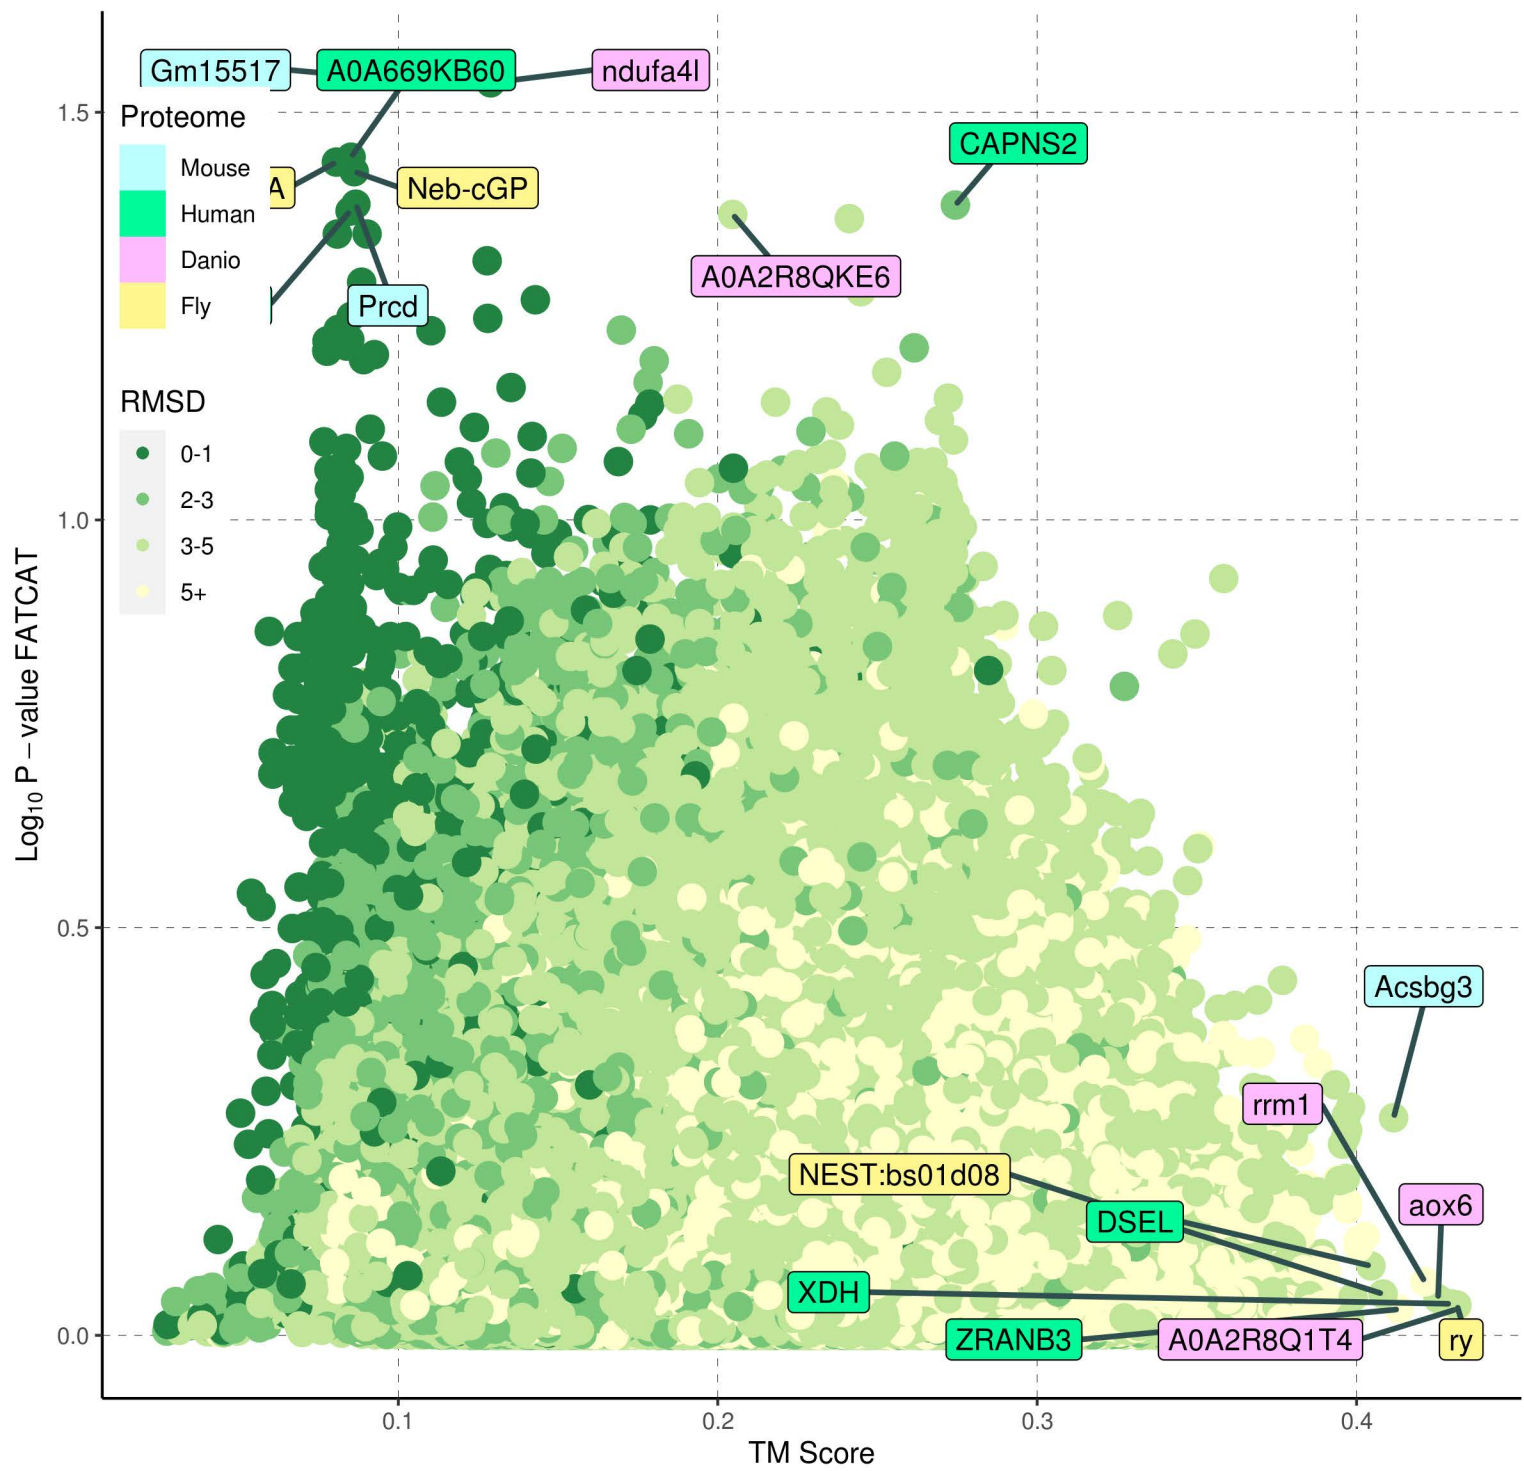



I2

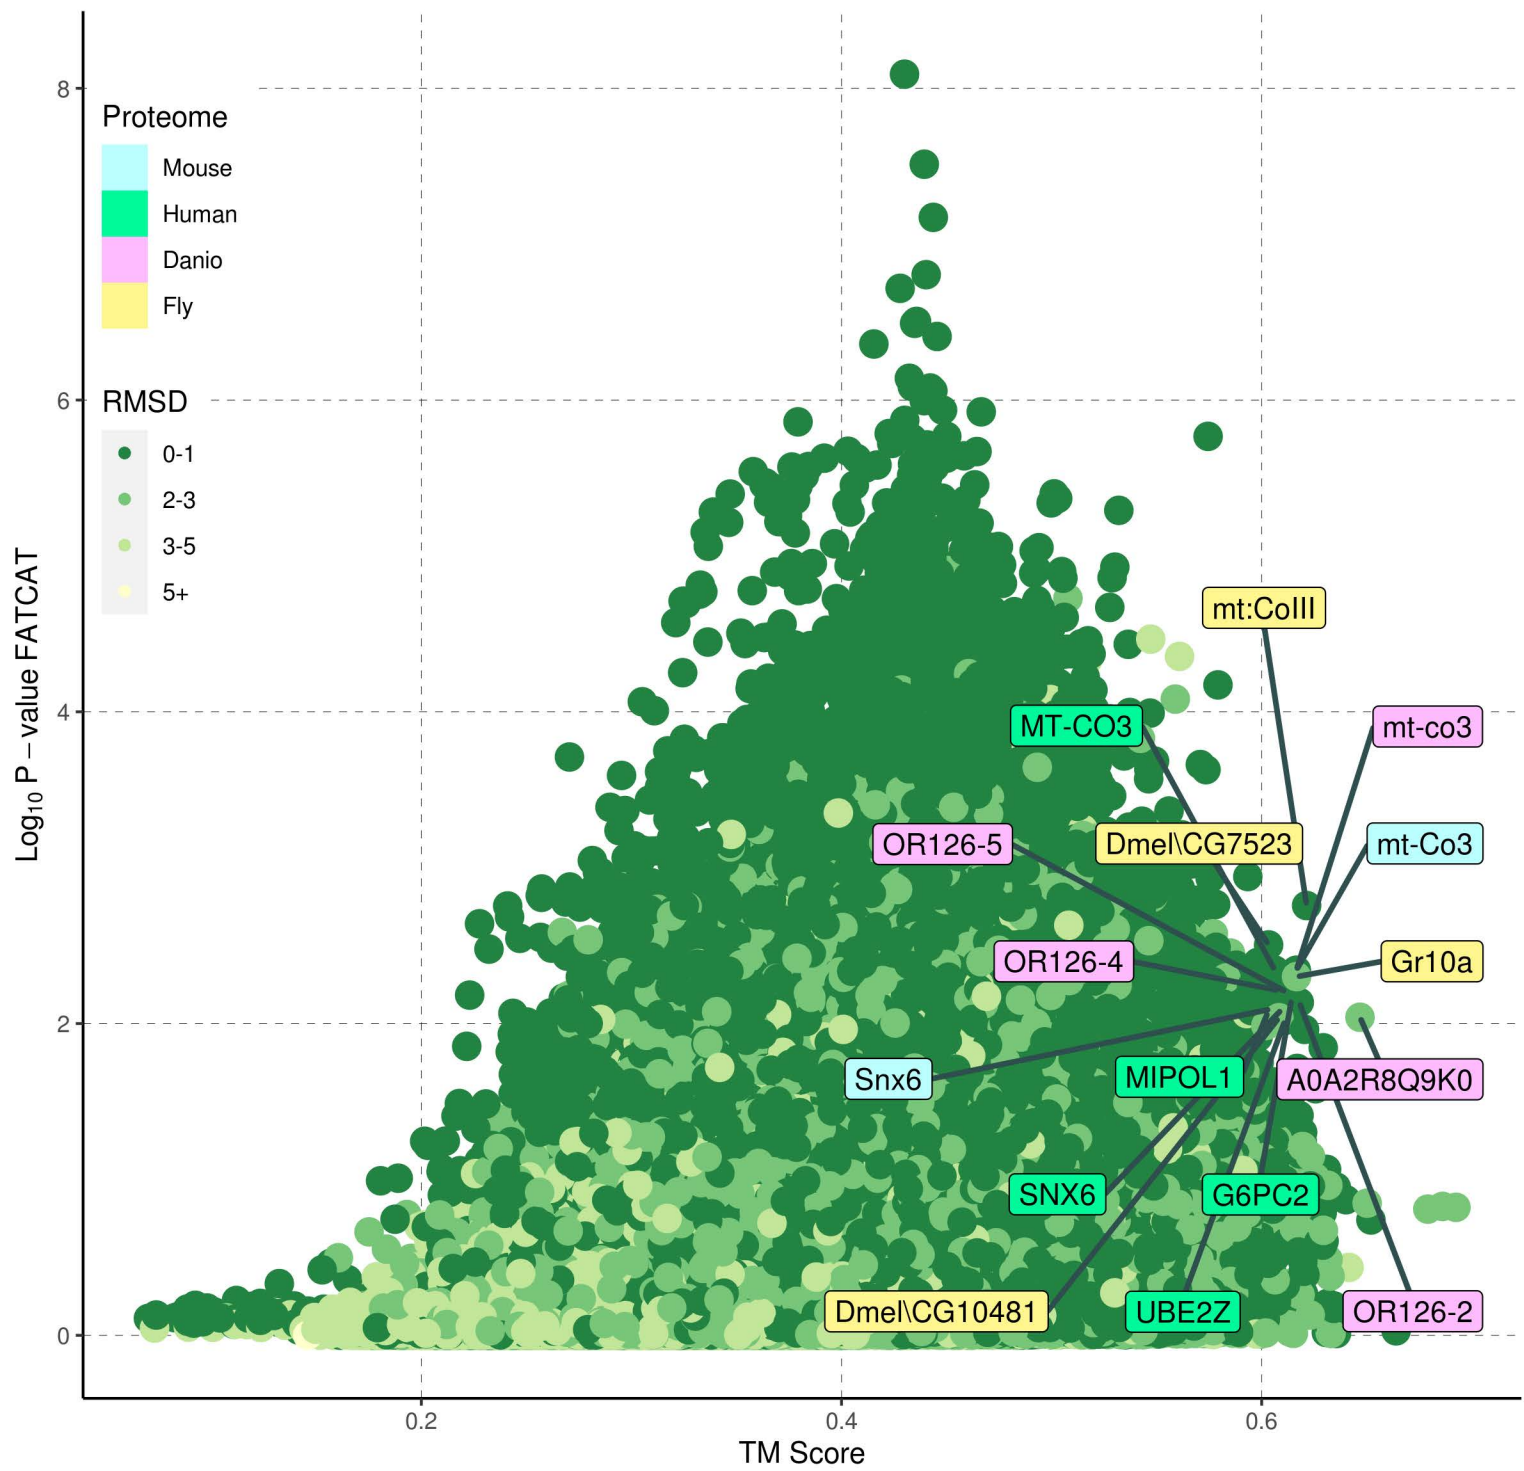

I3 : No hits, top-scoring values are indicated

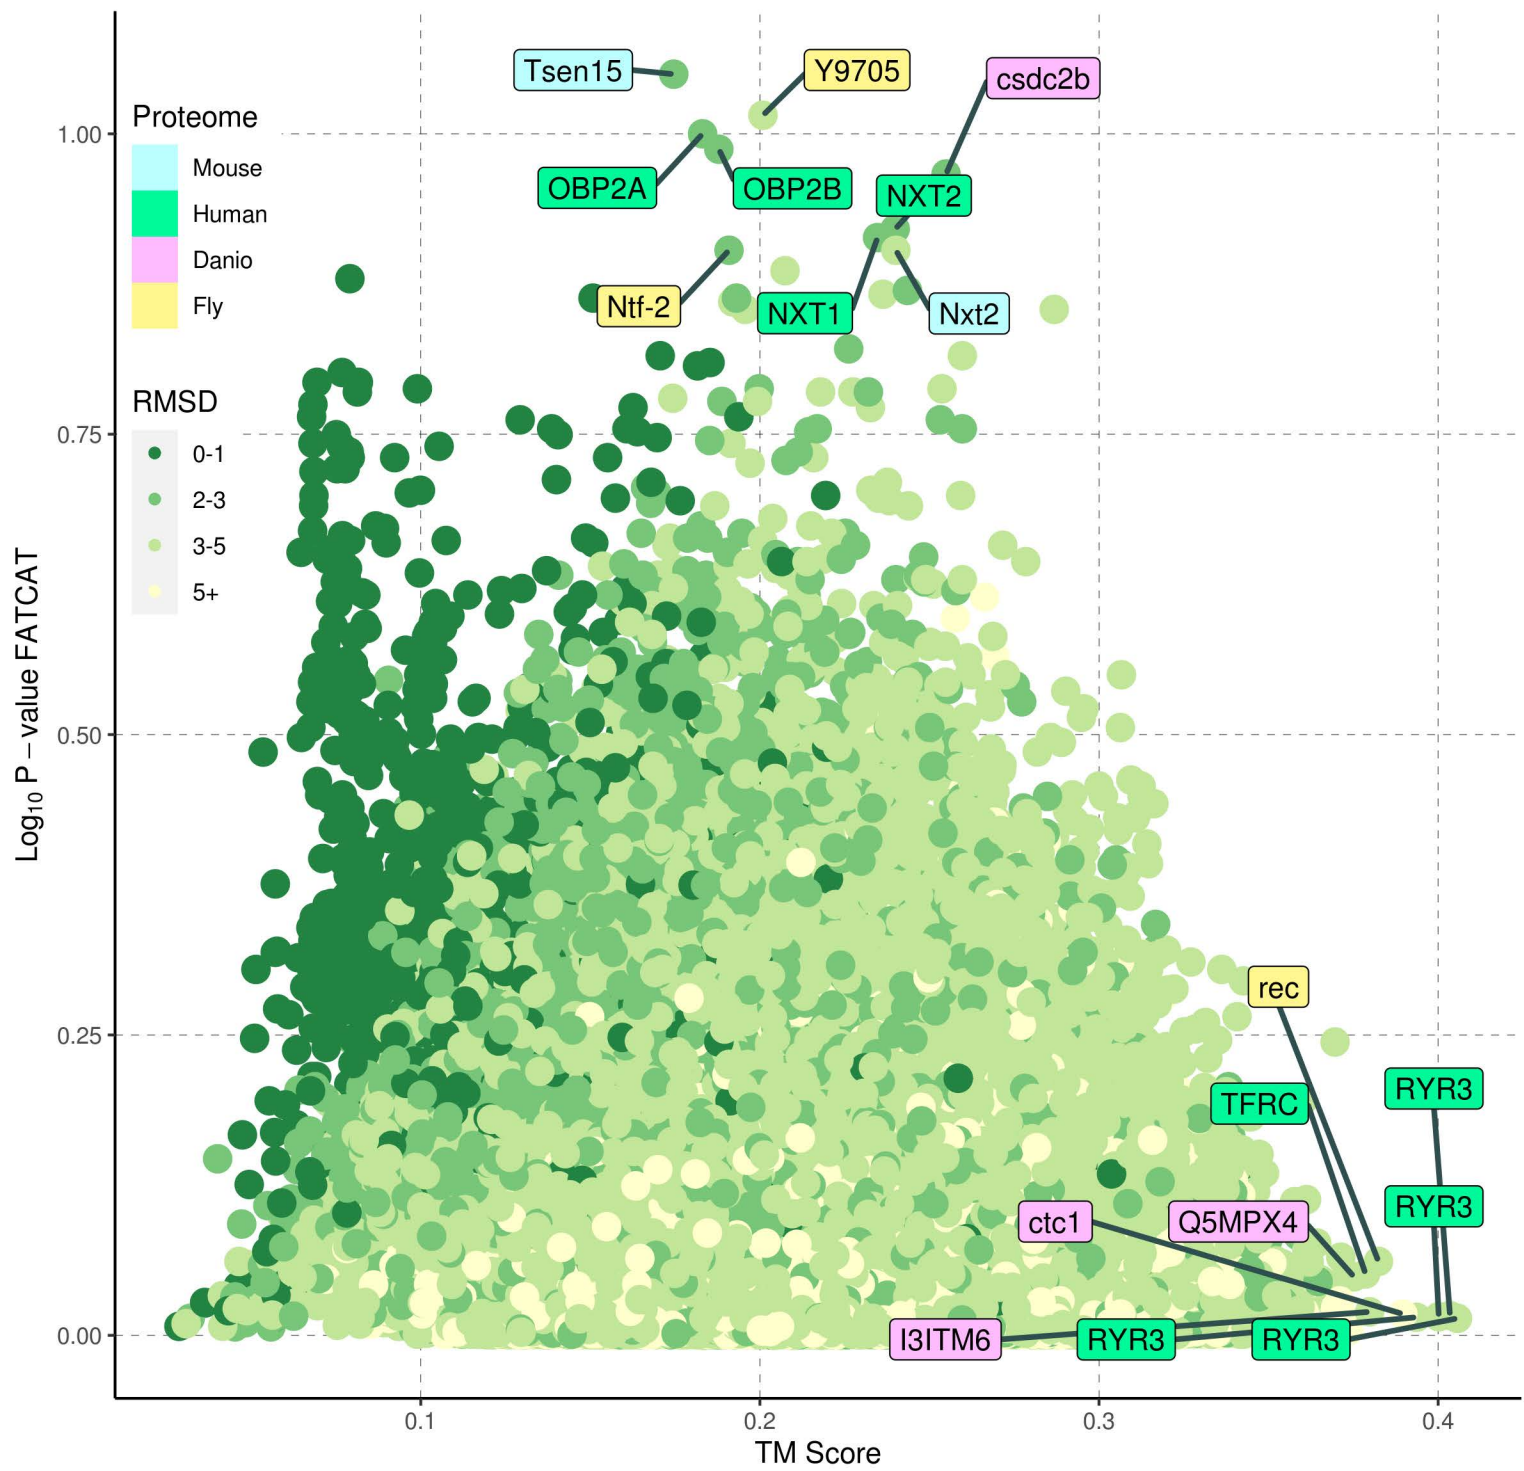

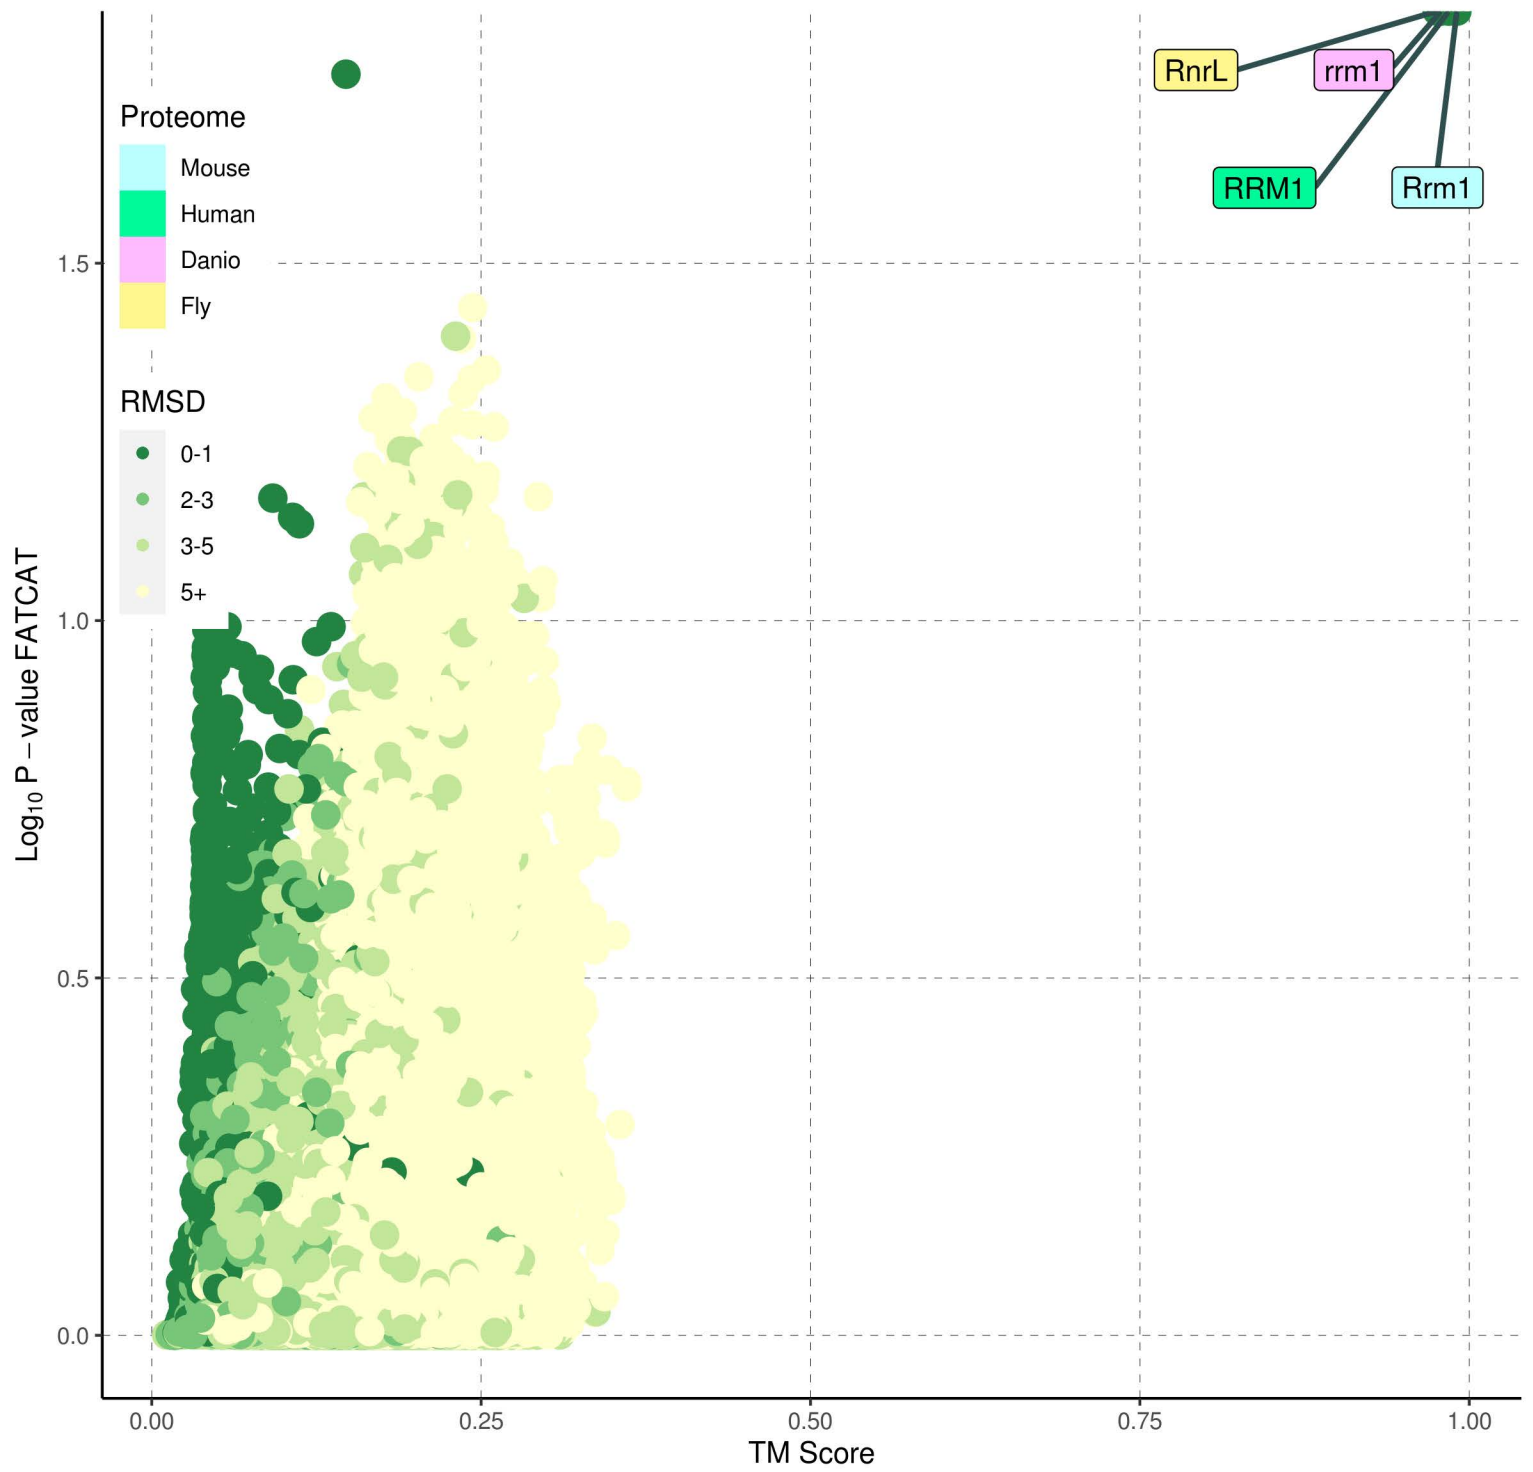

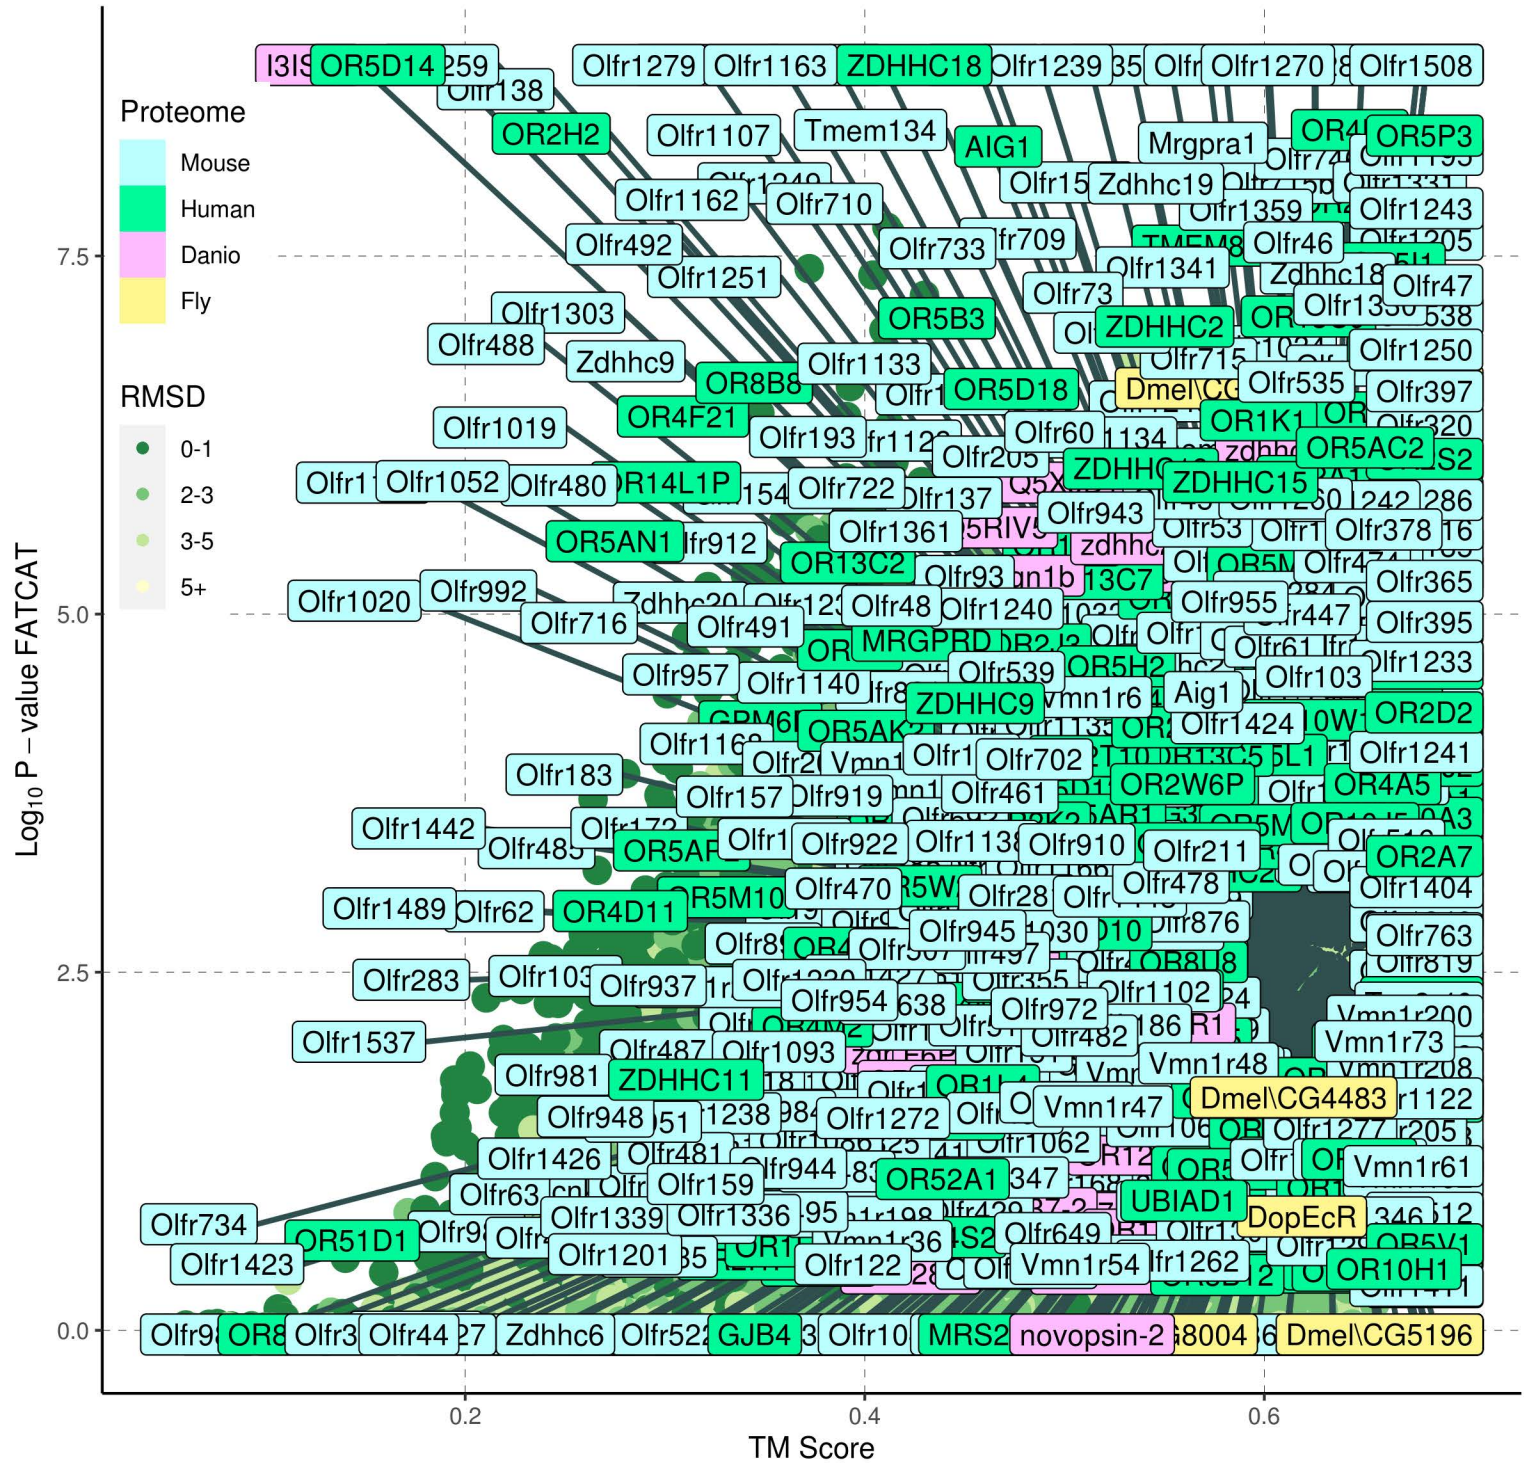

I6 : No hits, top-scoring values are indicated

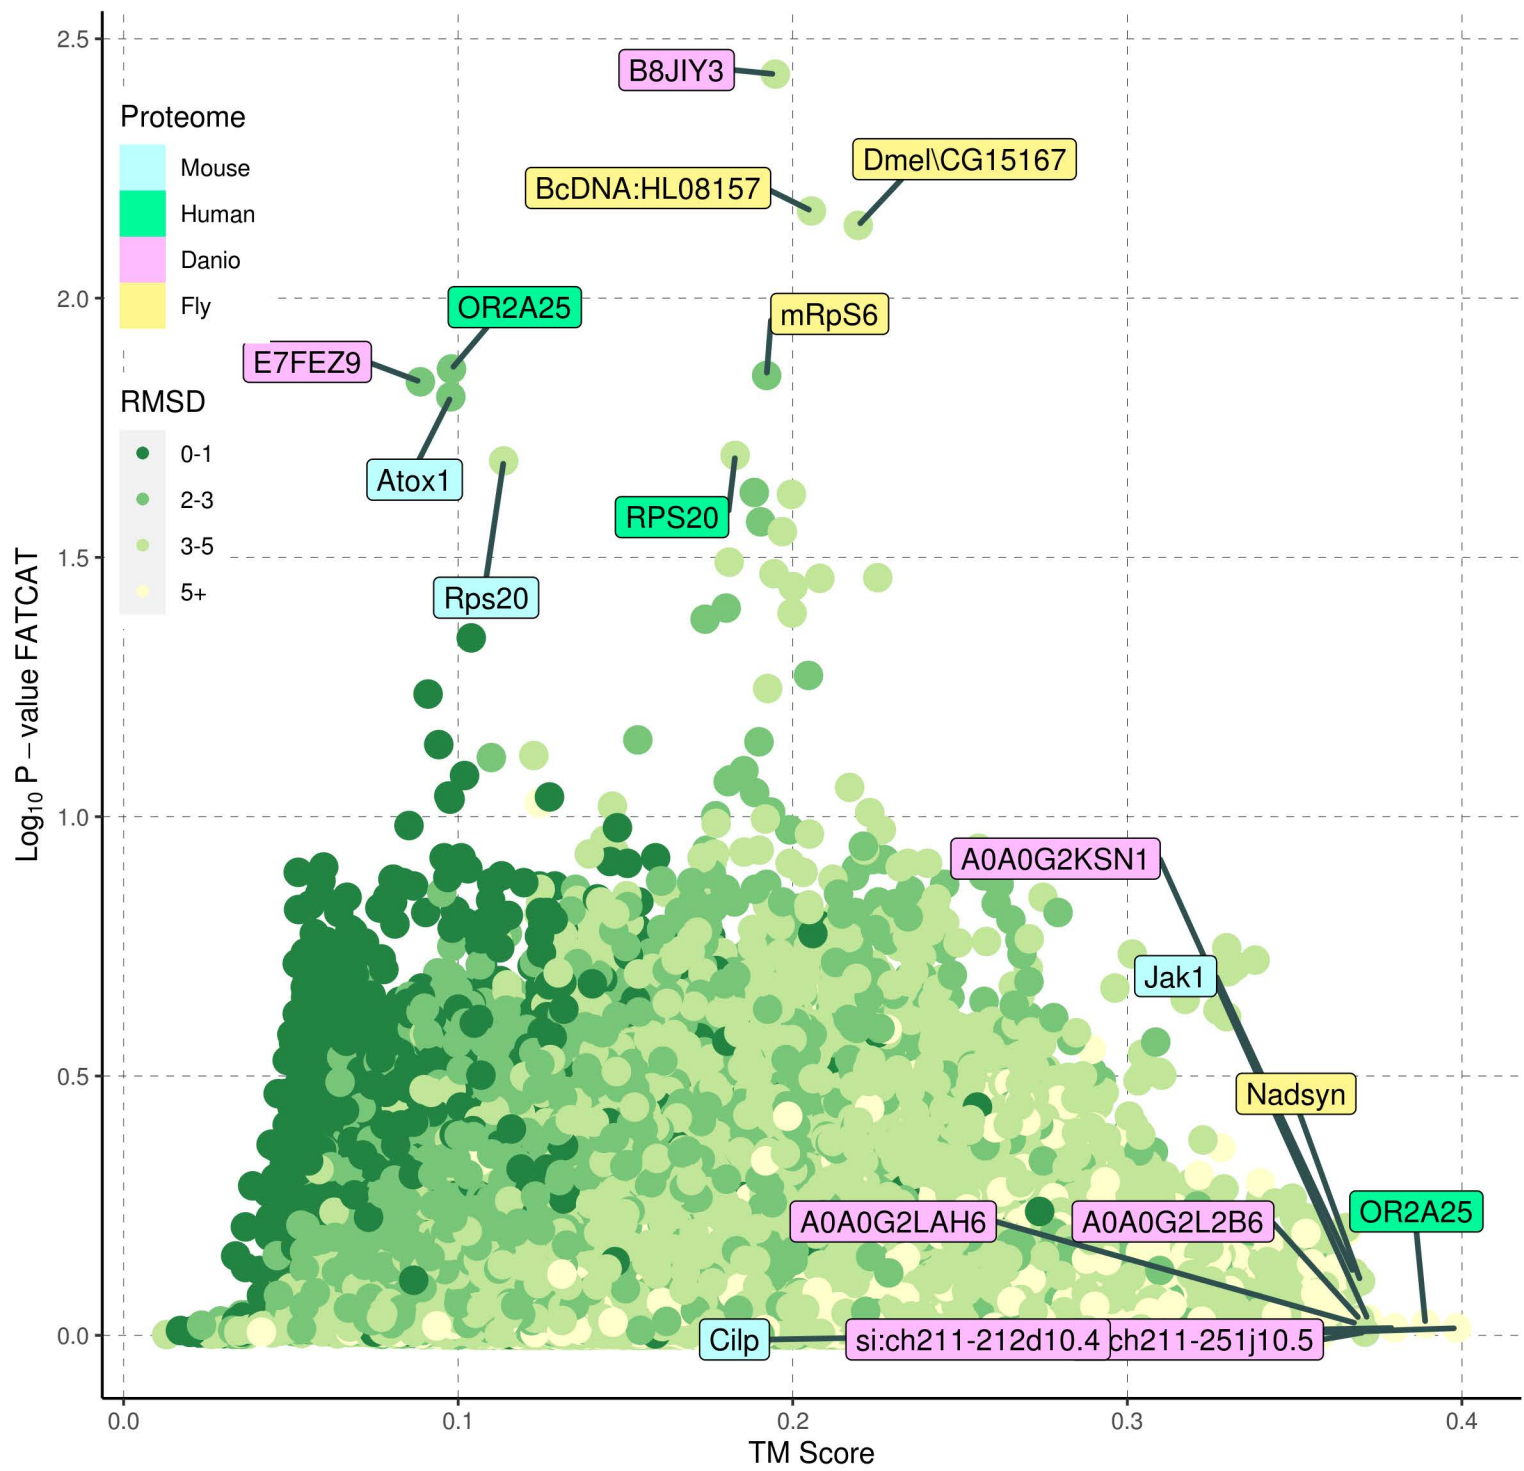

I7 : No hits, top-scoring values are indicated

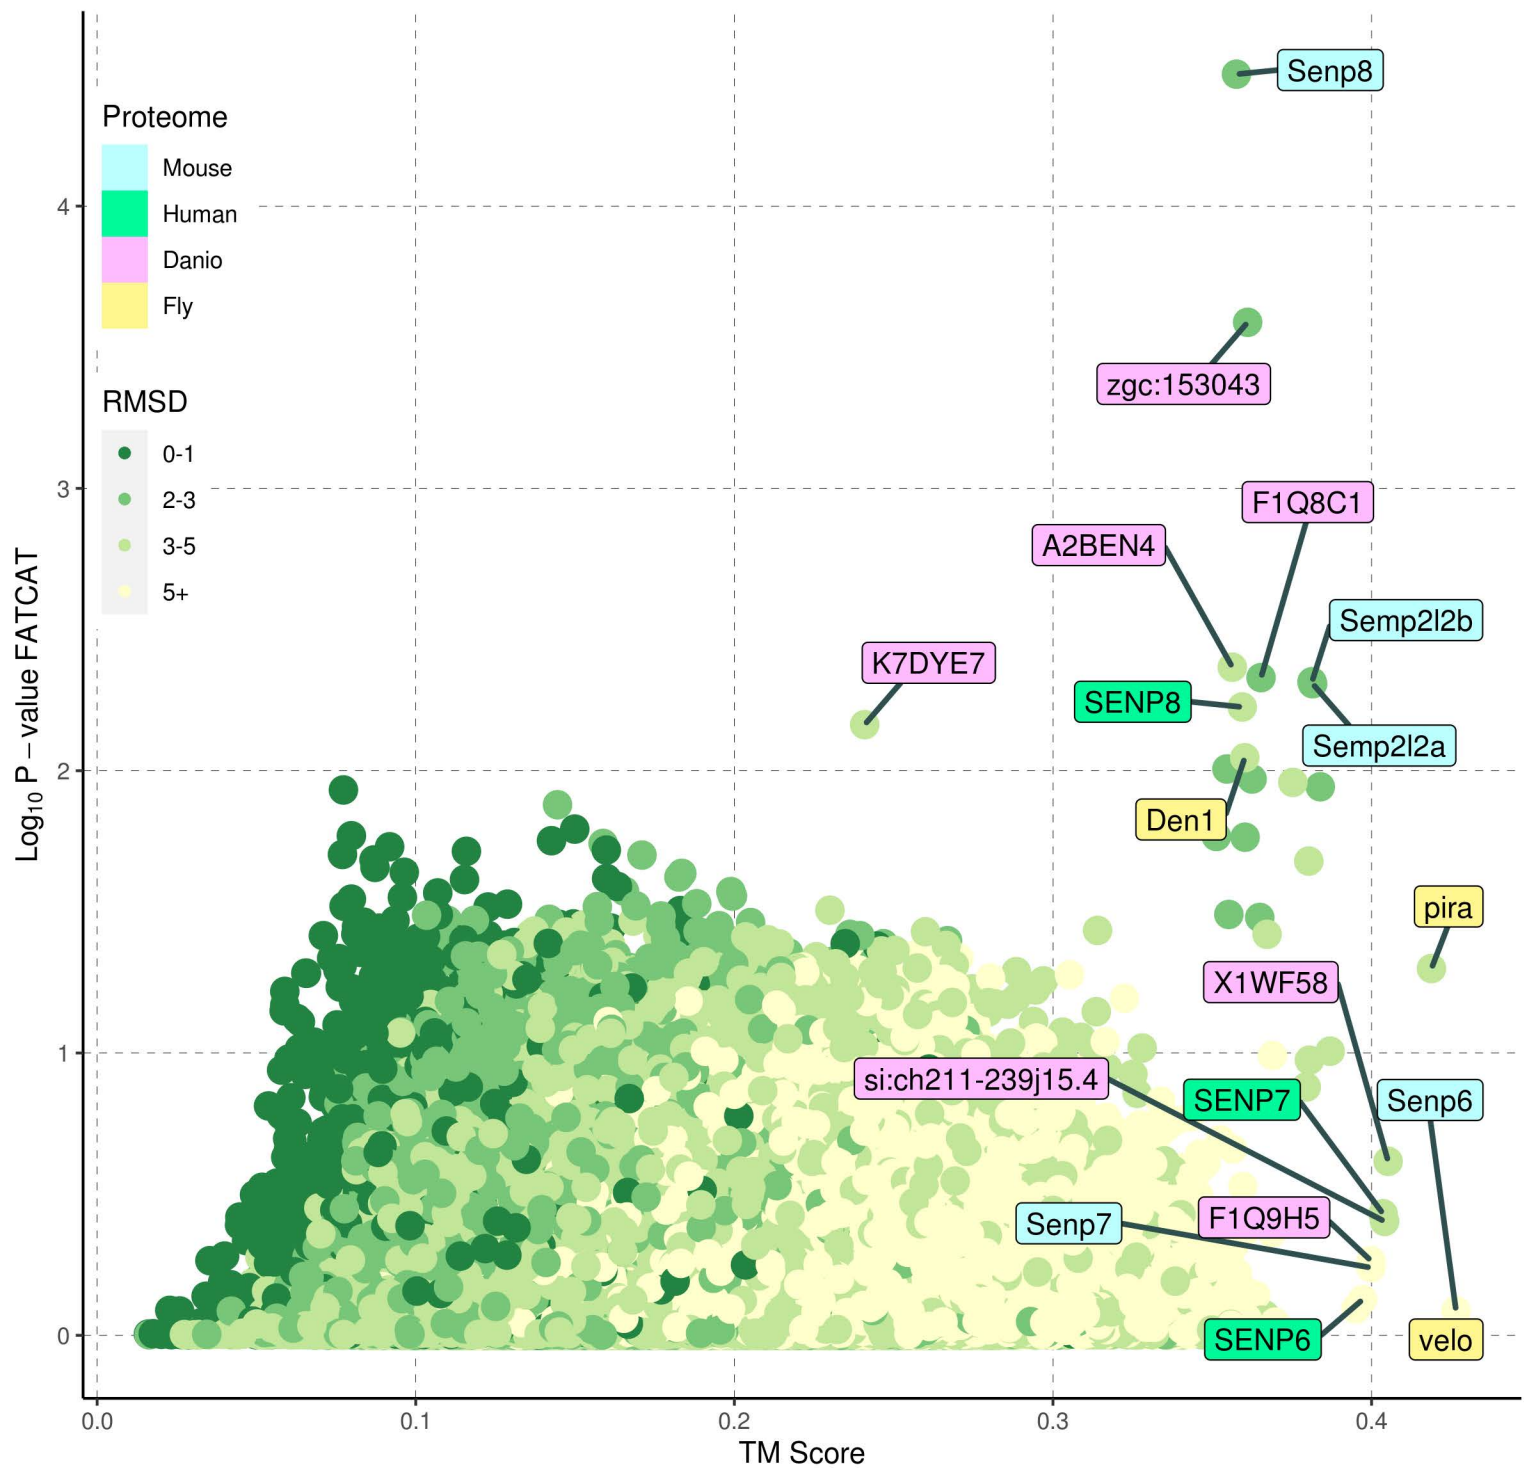

I8

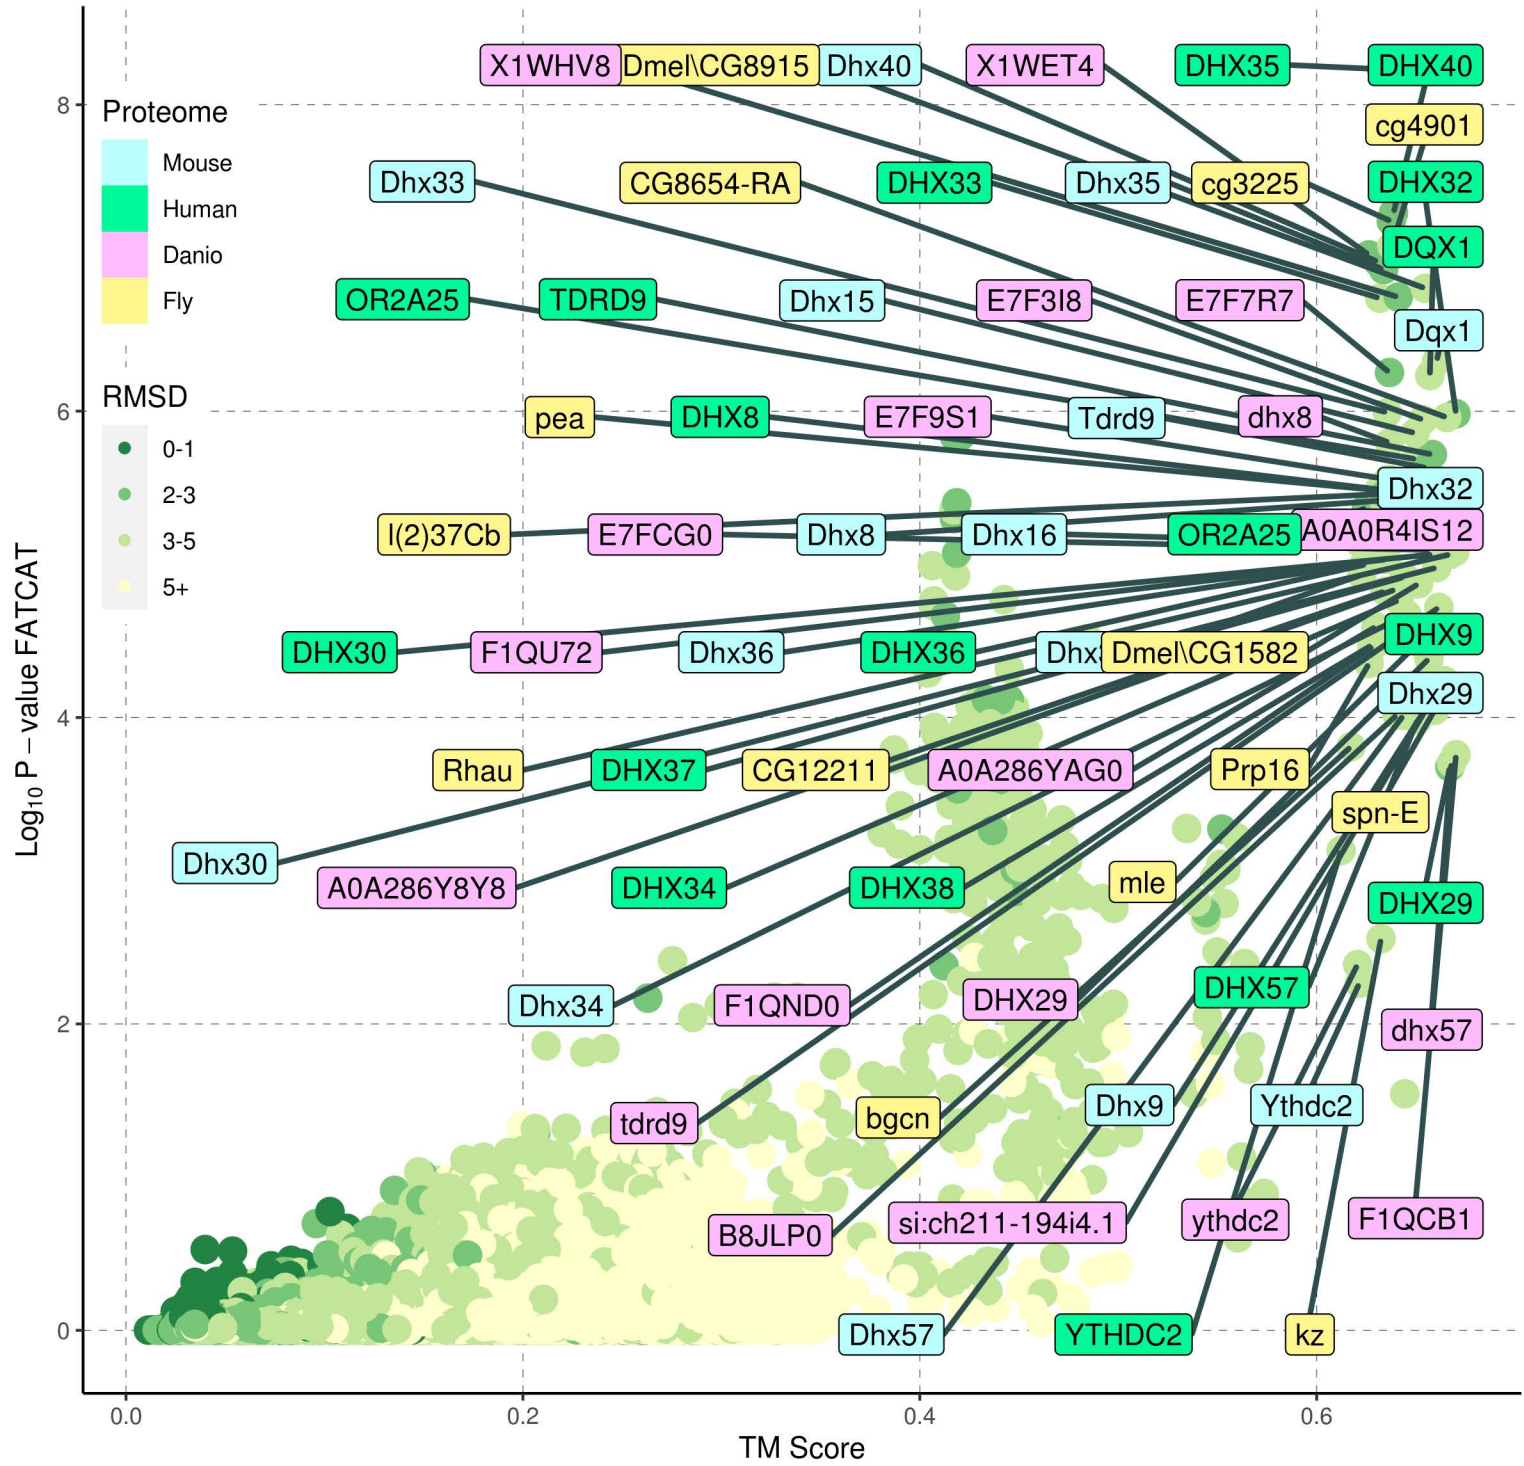

## IorfA

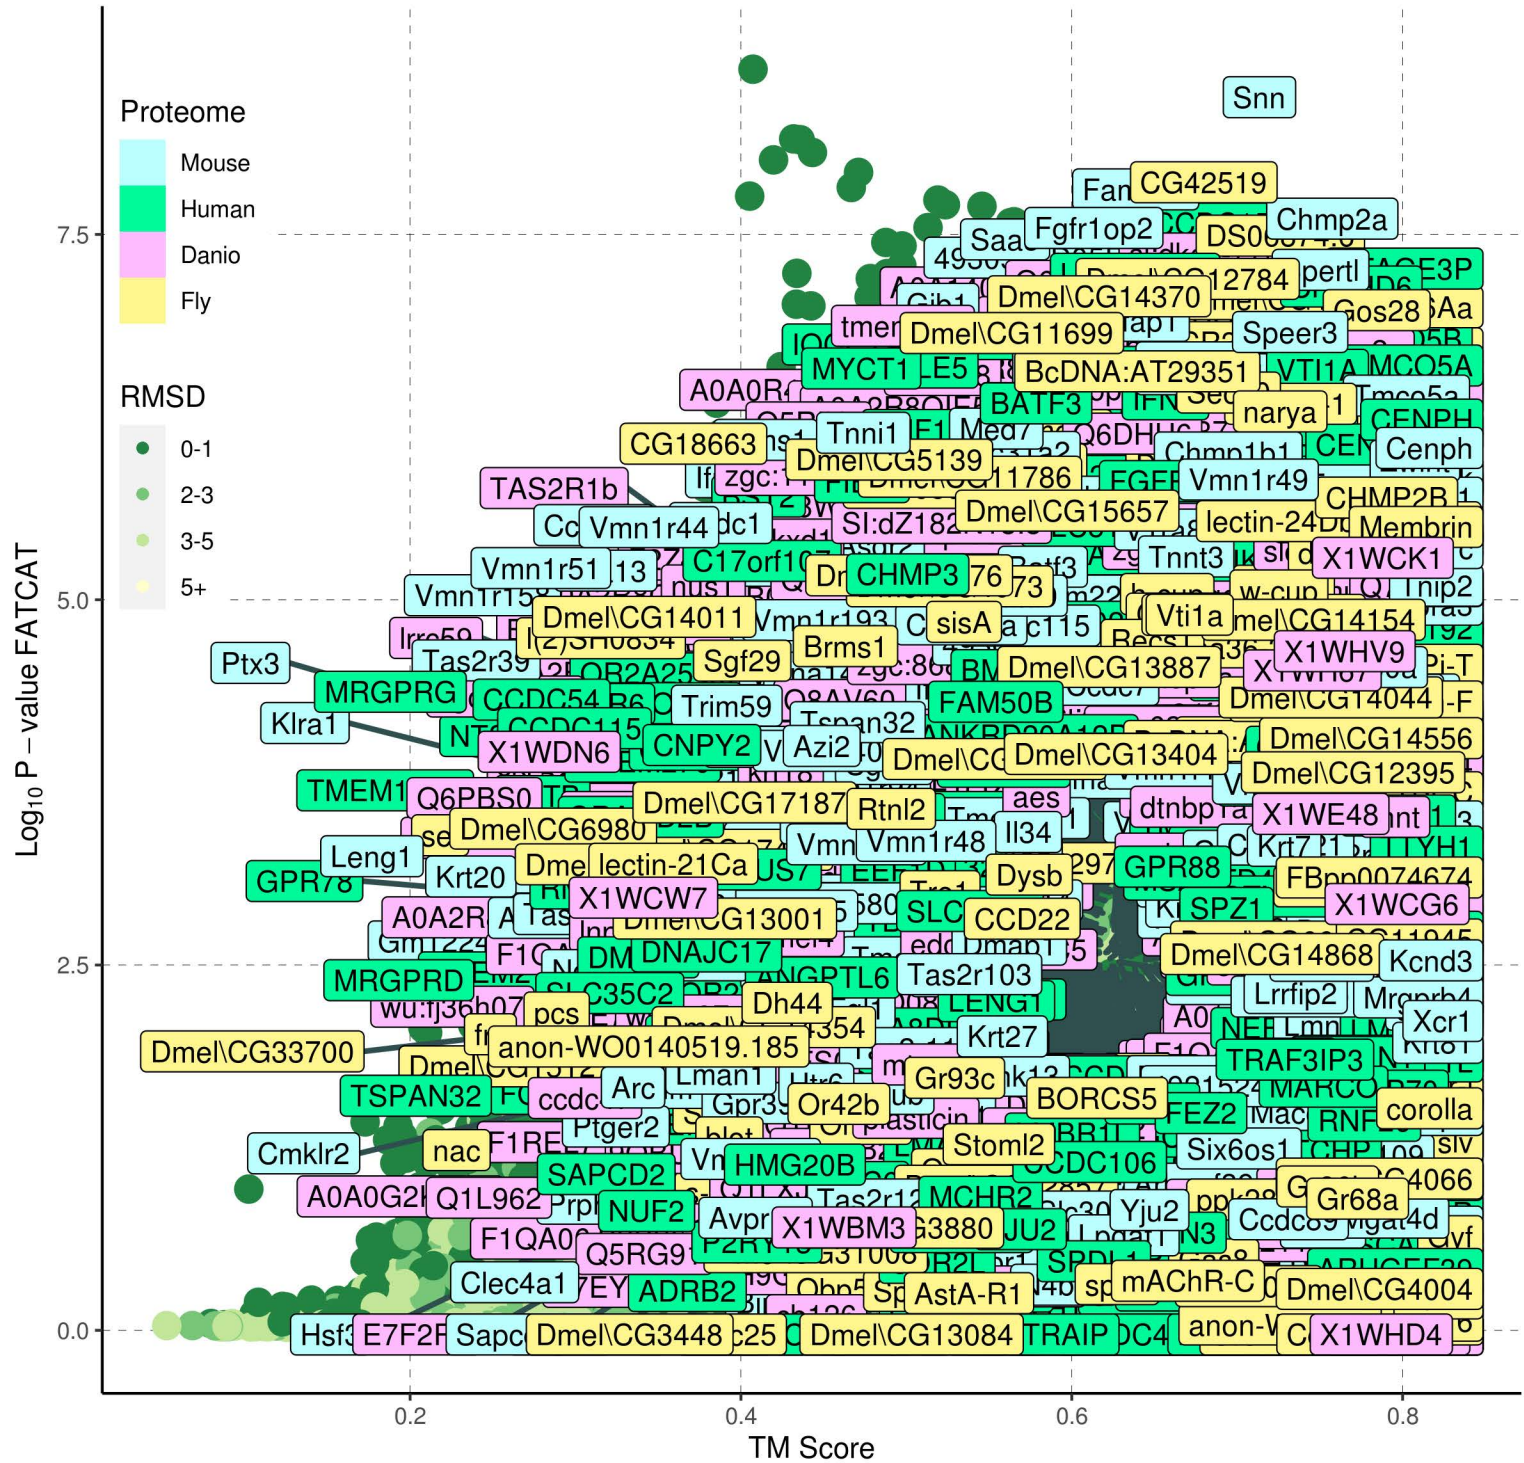



# J1 : No hits, top-scoring values are indicated

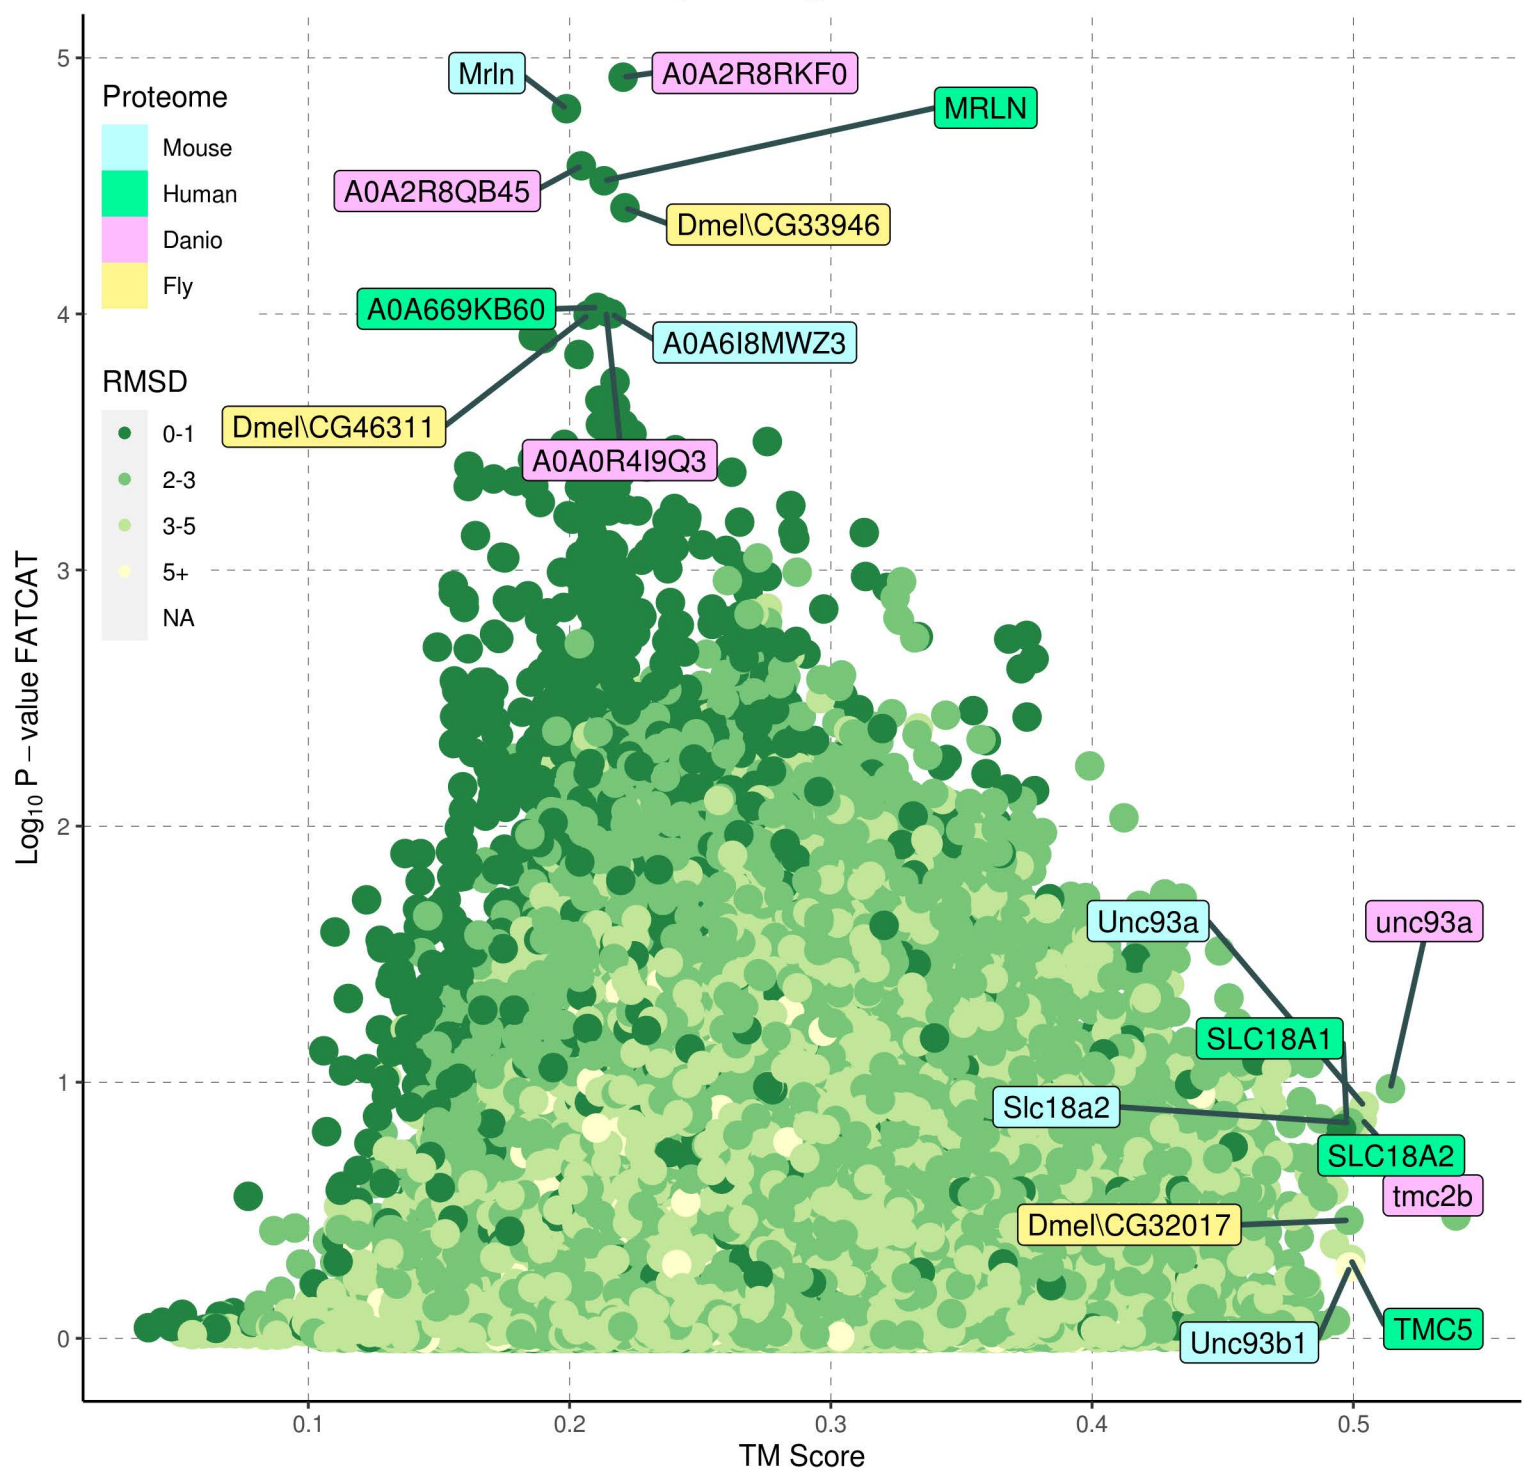

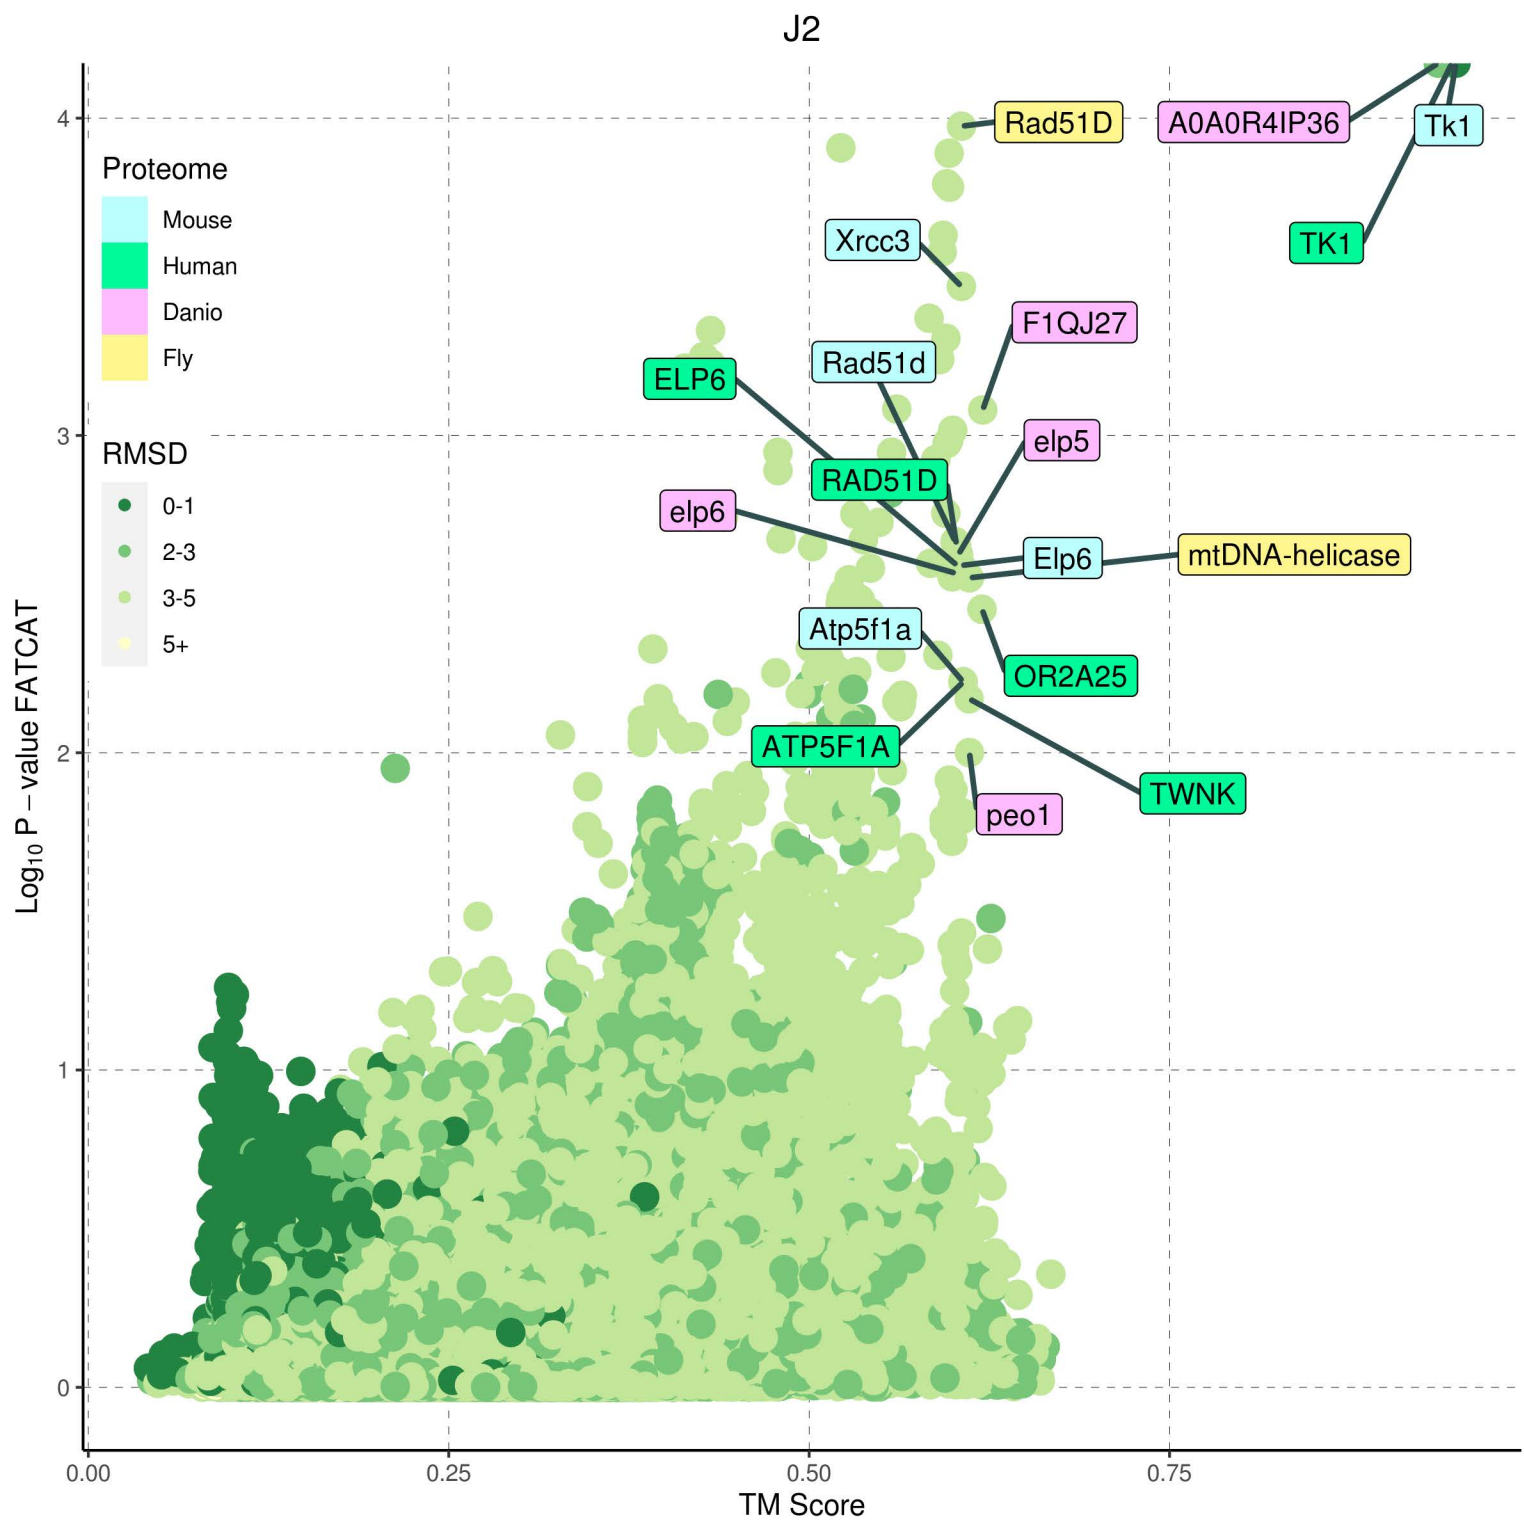

J3

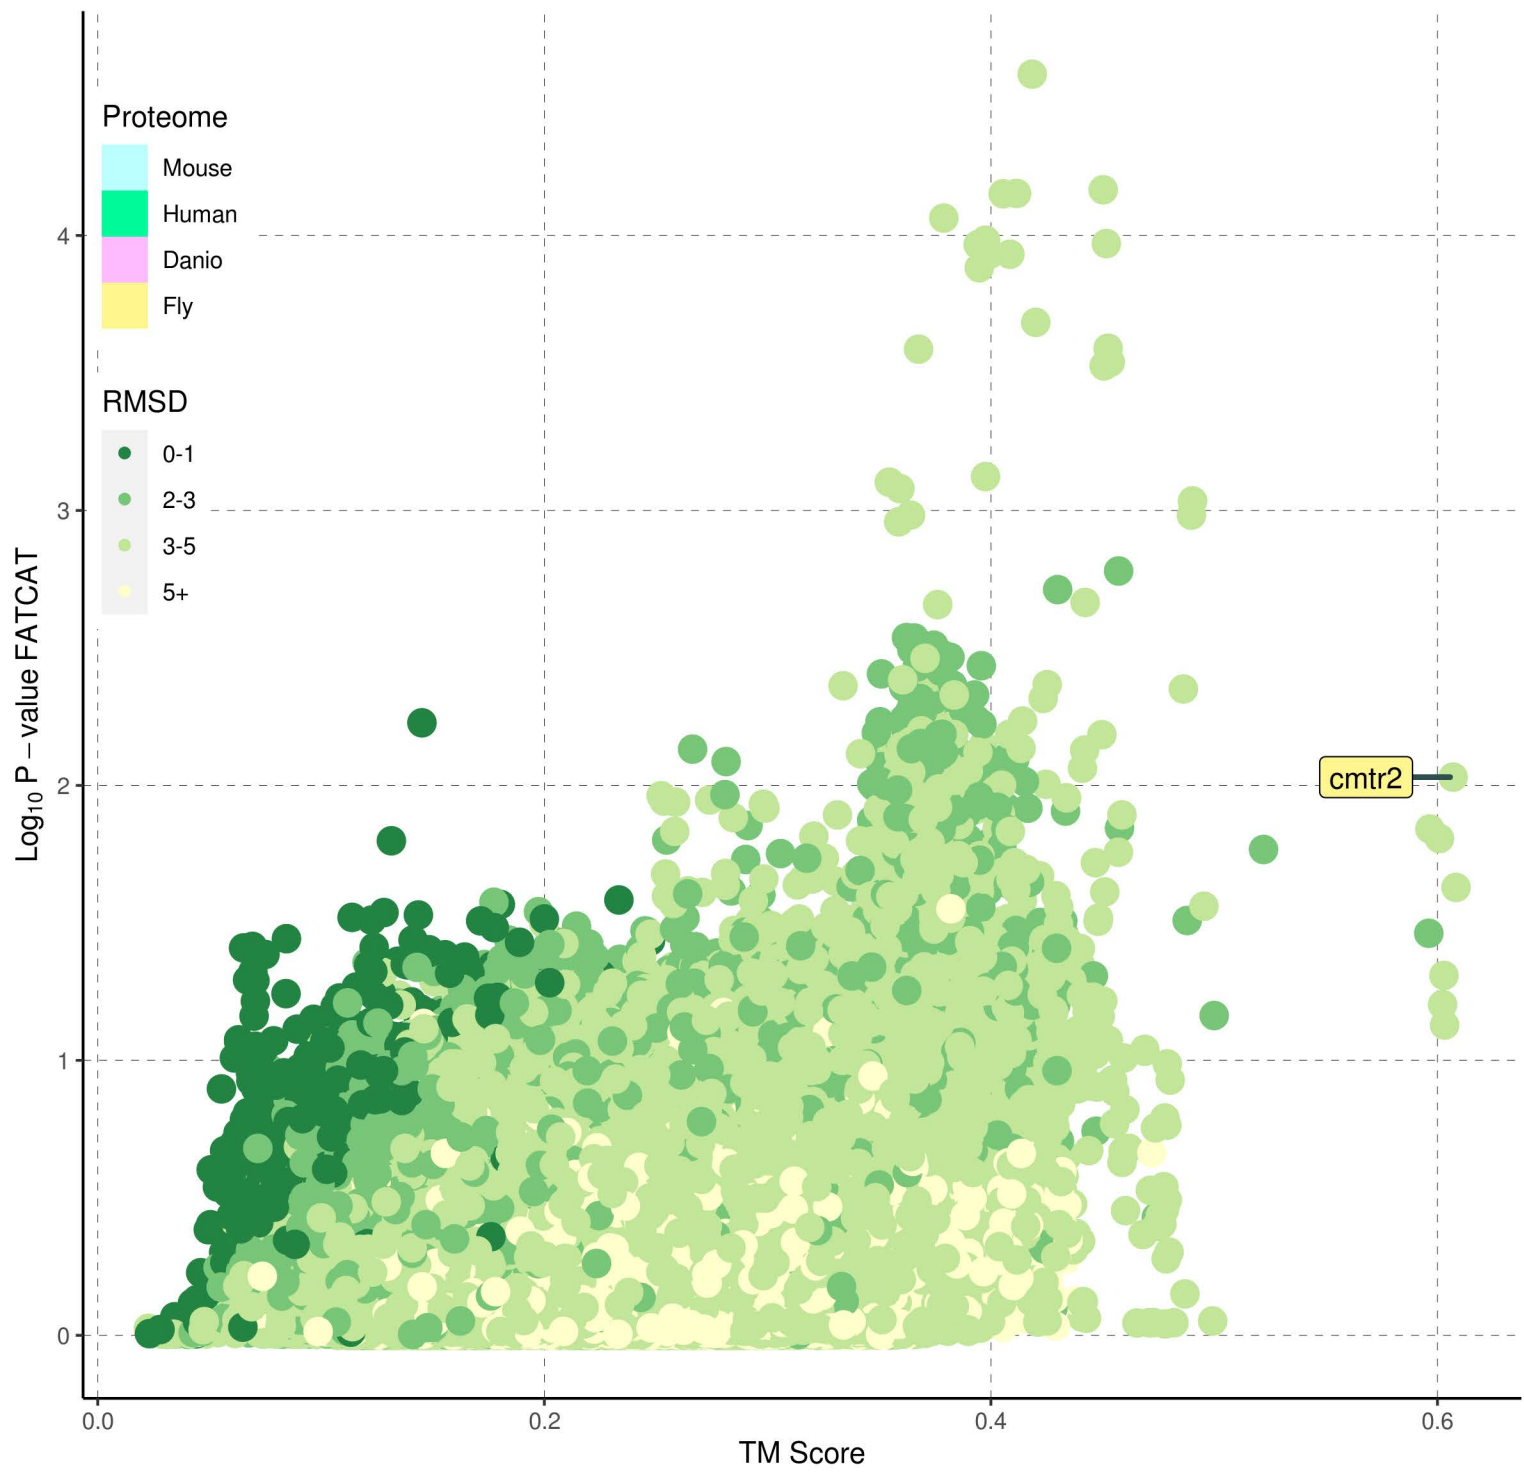

J4

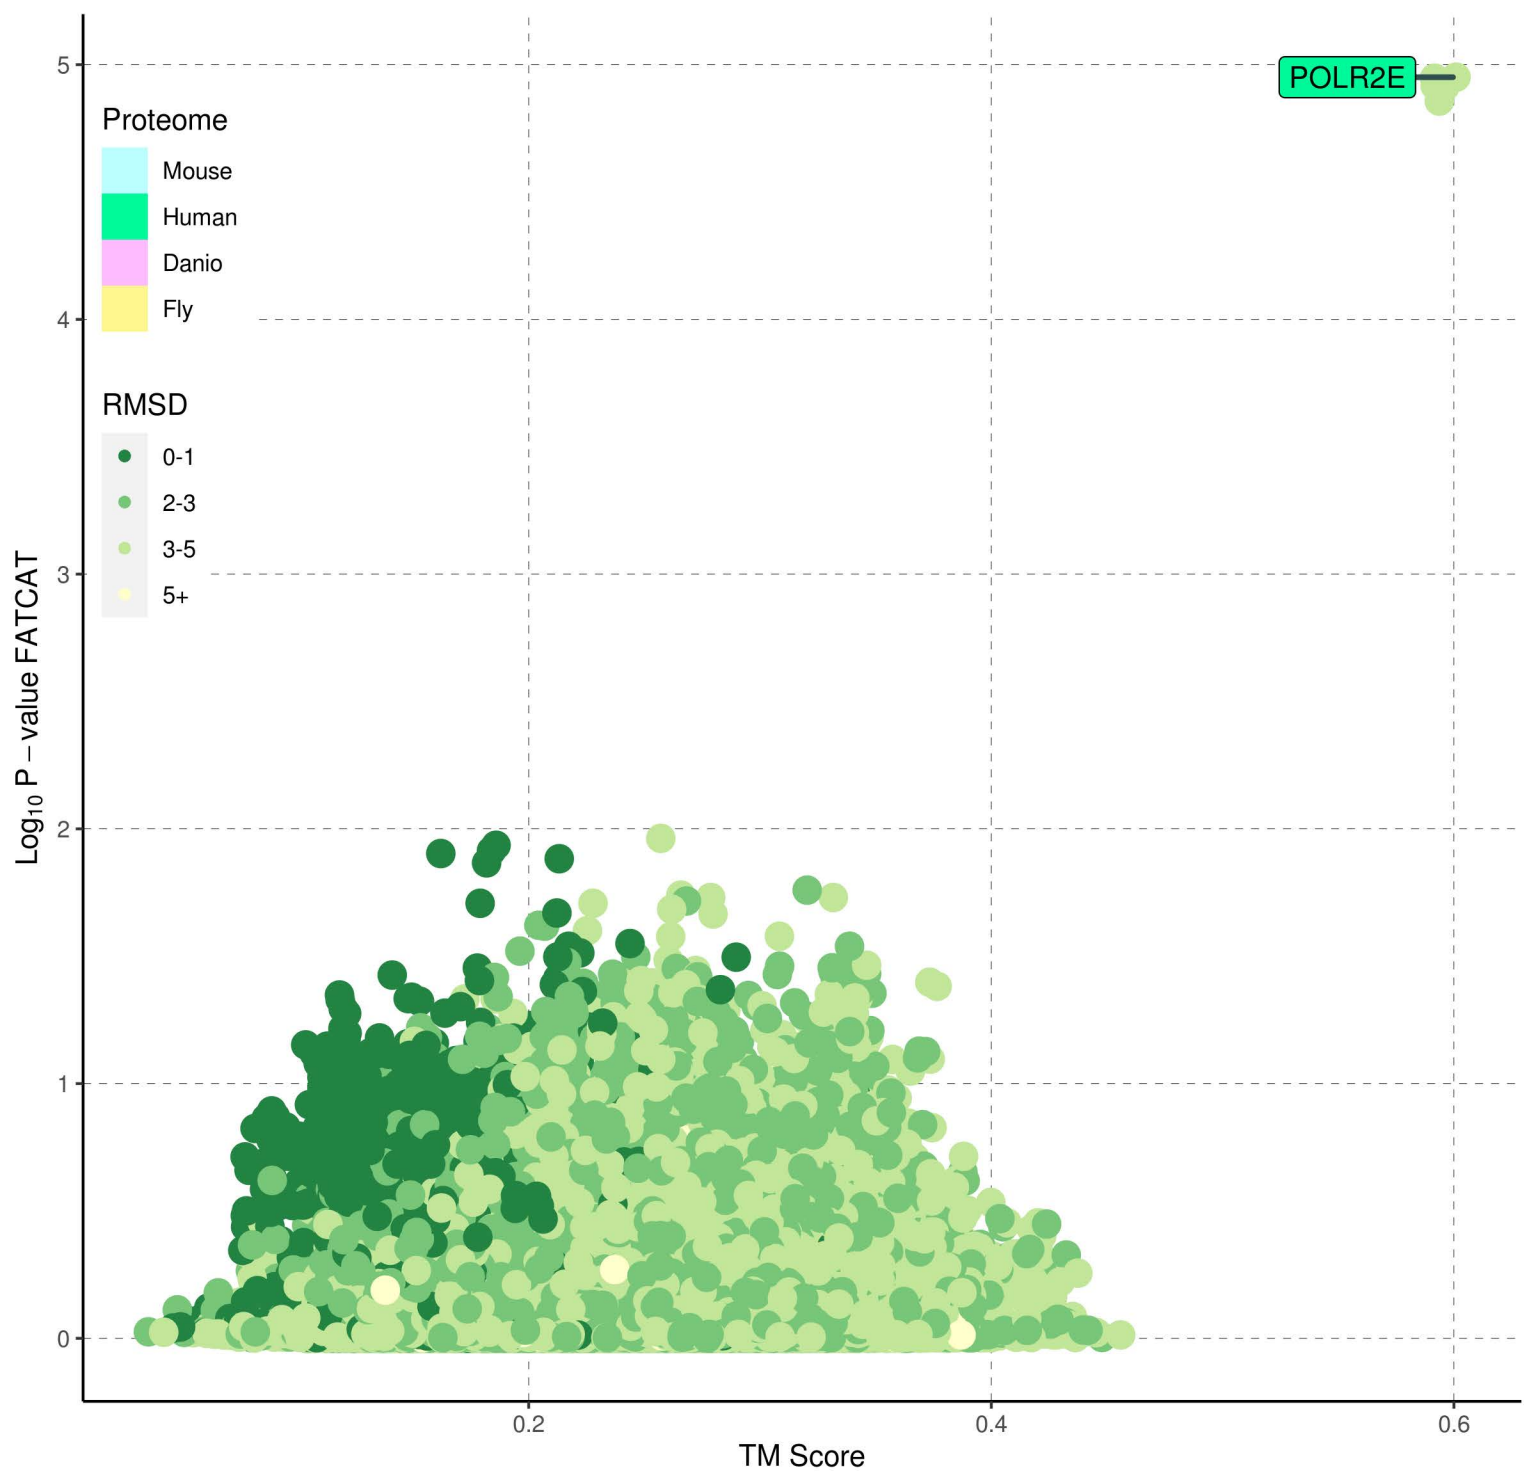

J5 : No hits, top-scoring values are indicated

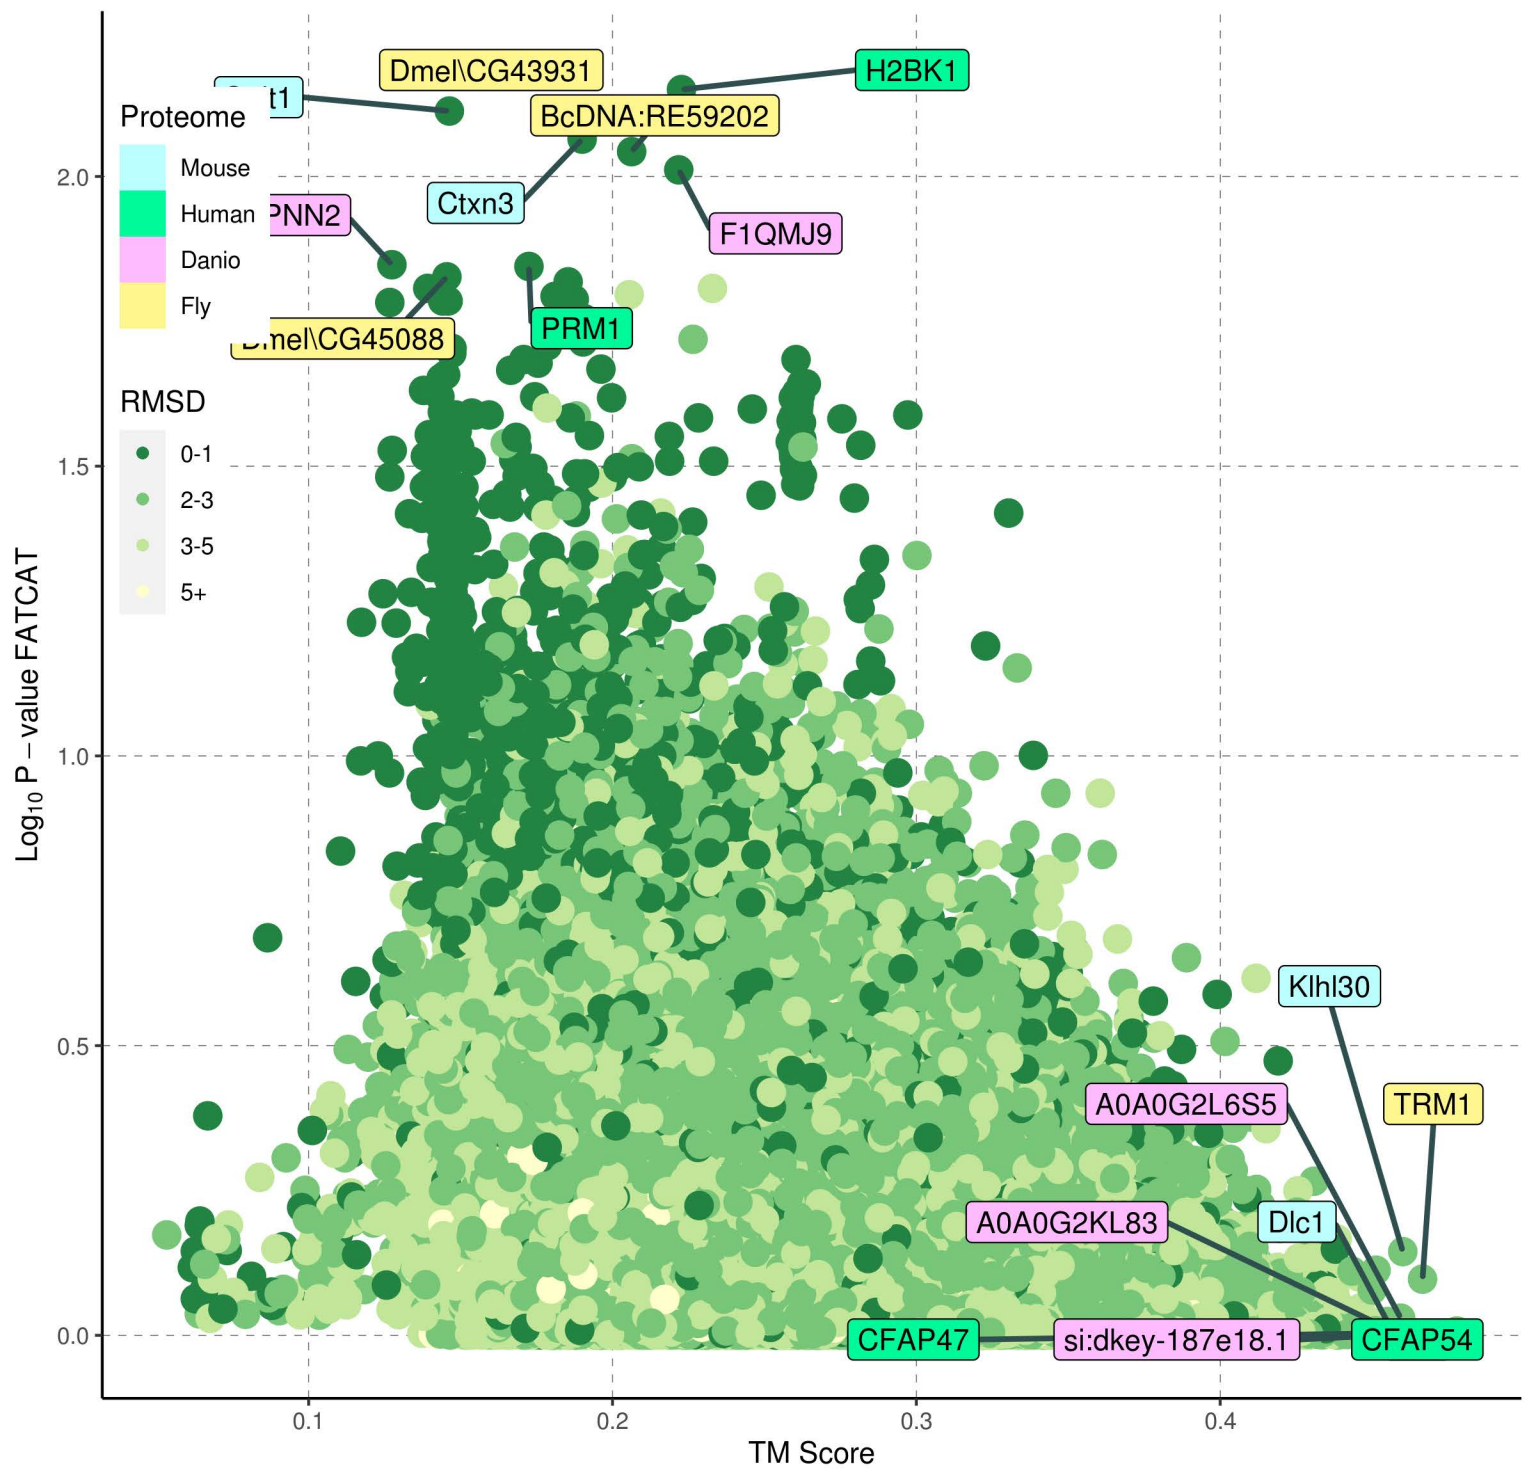

J6

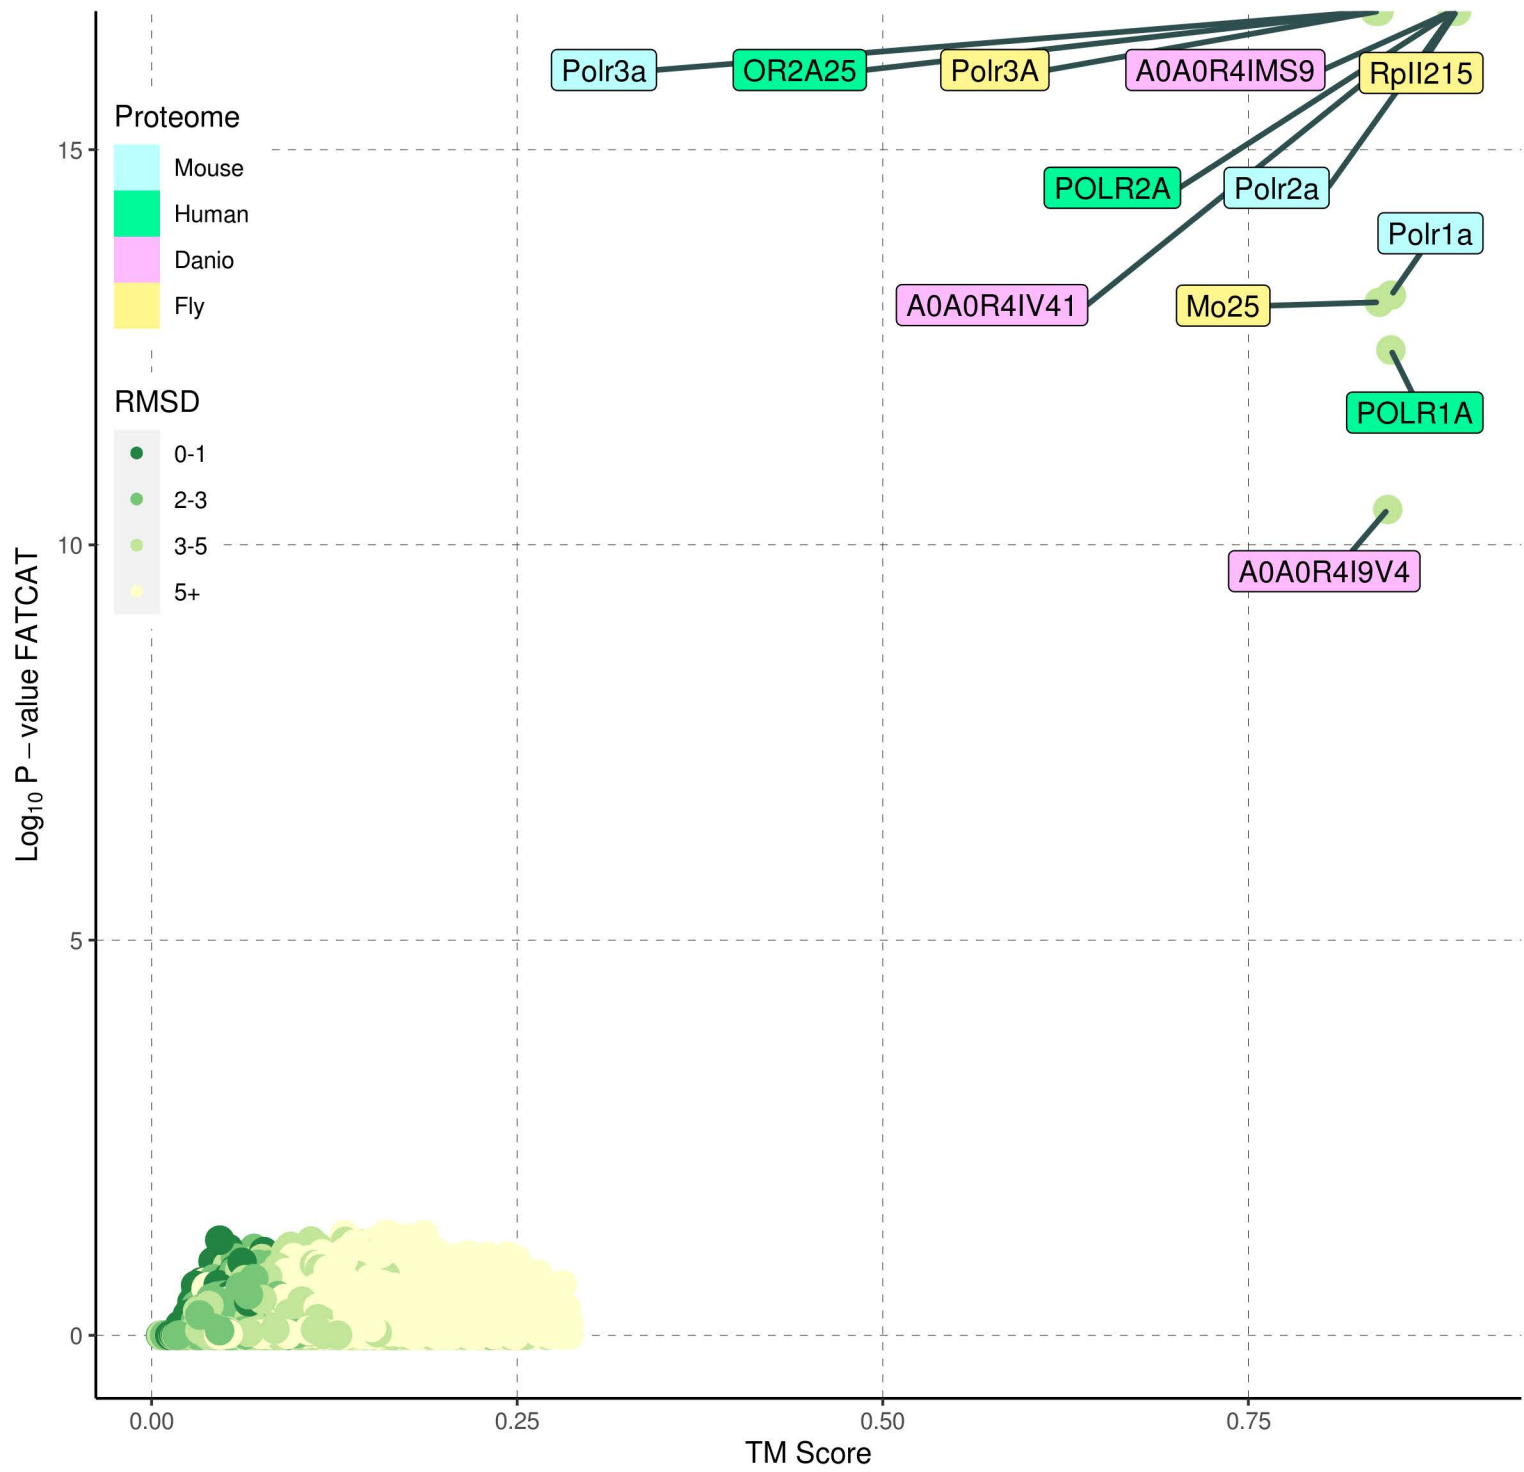







K3

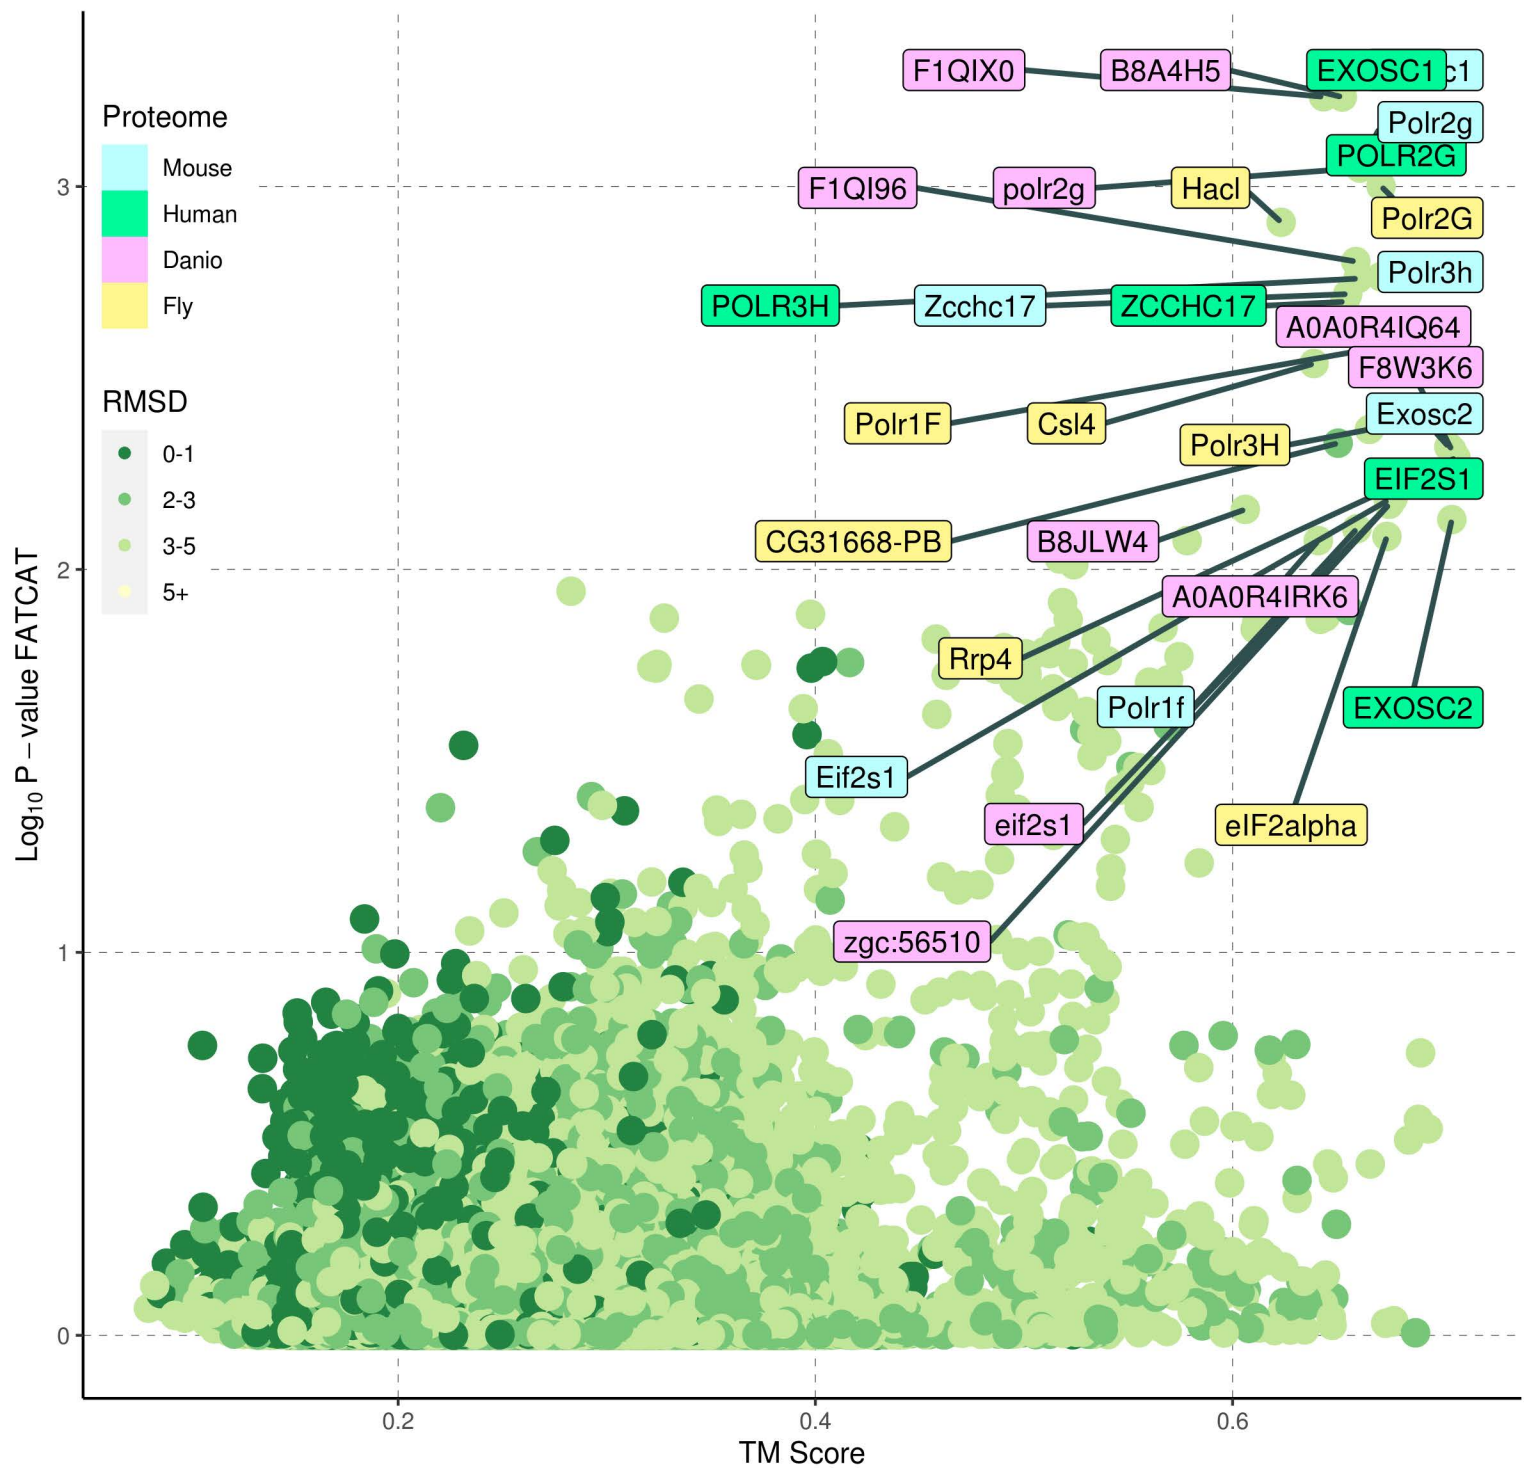

K4

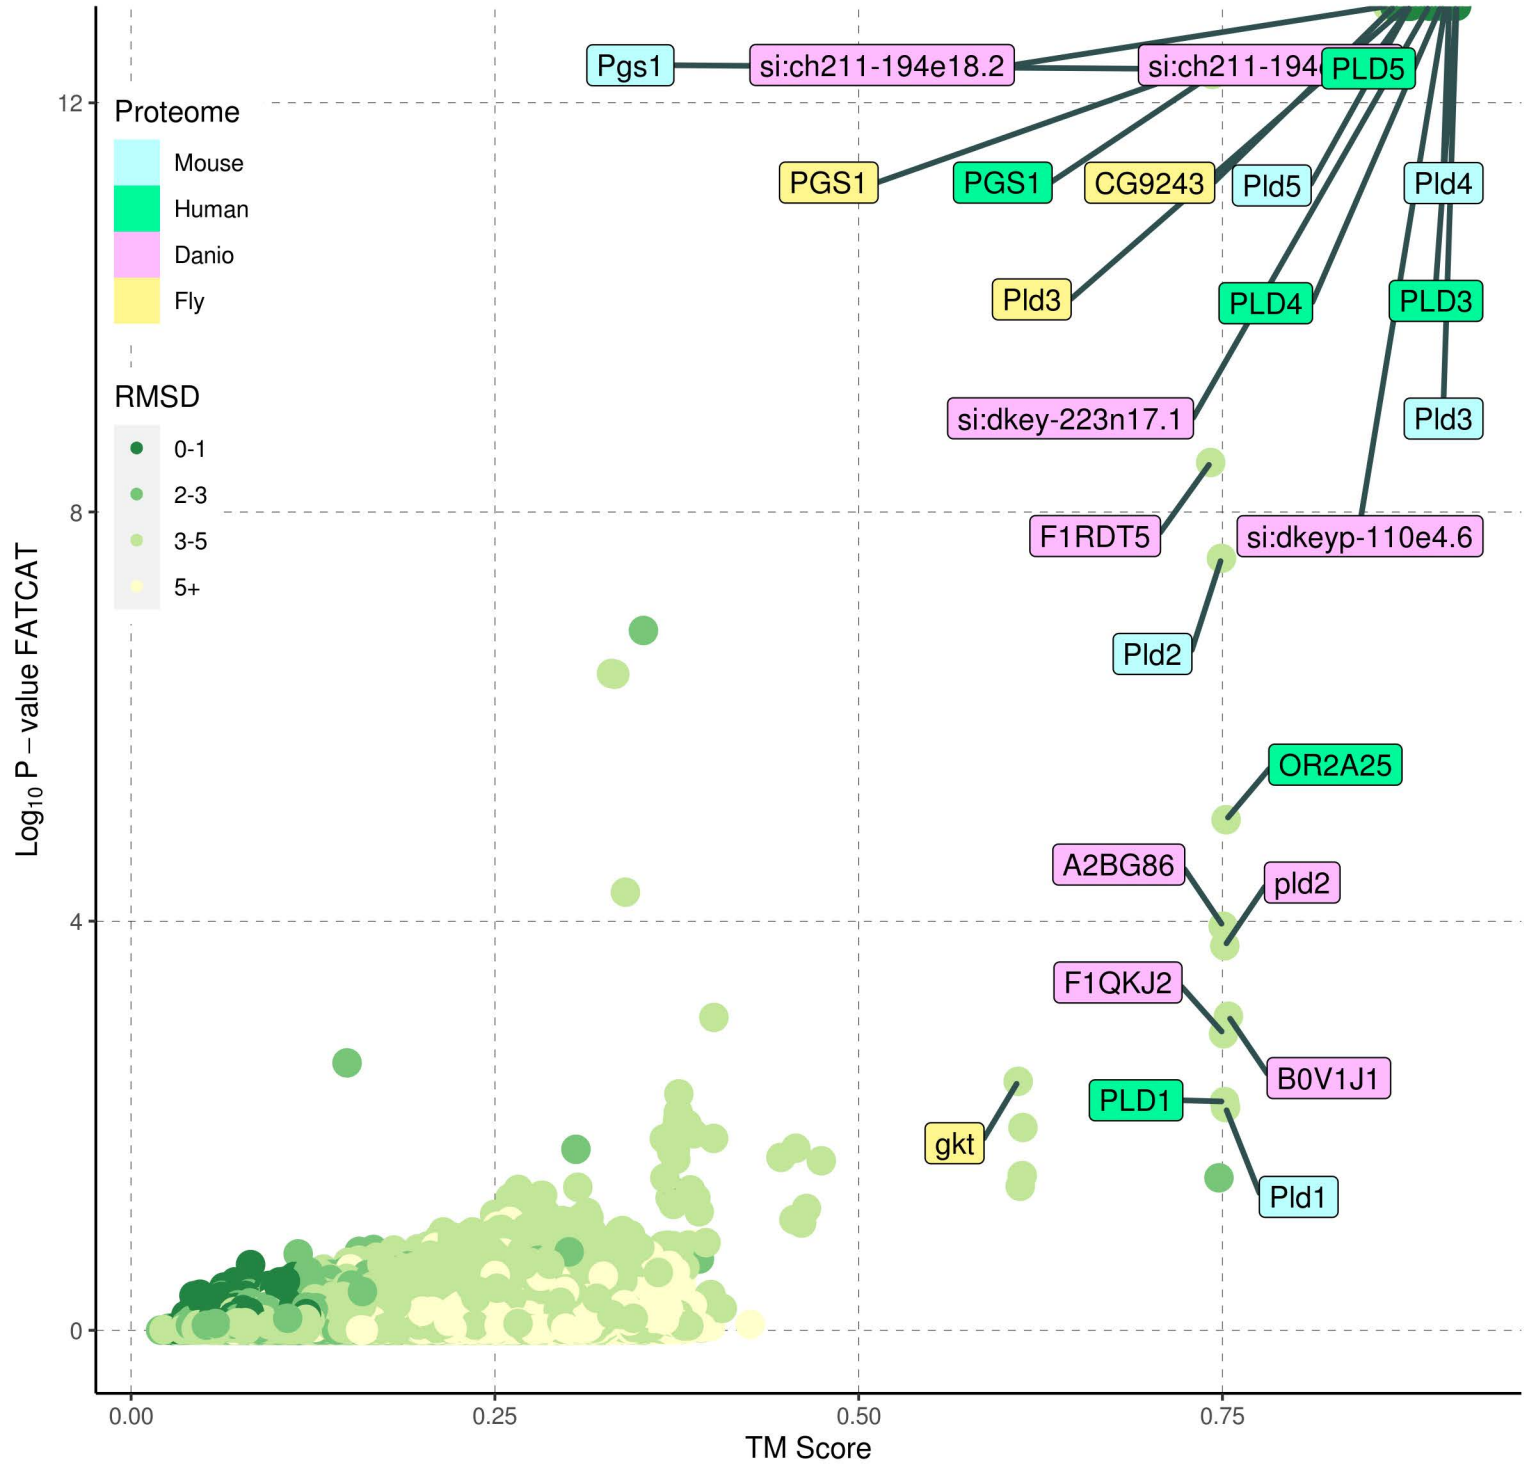

## K5

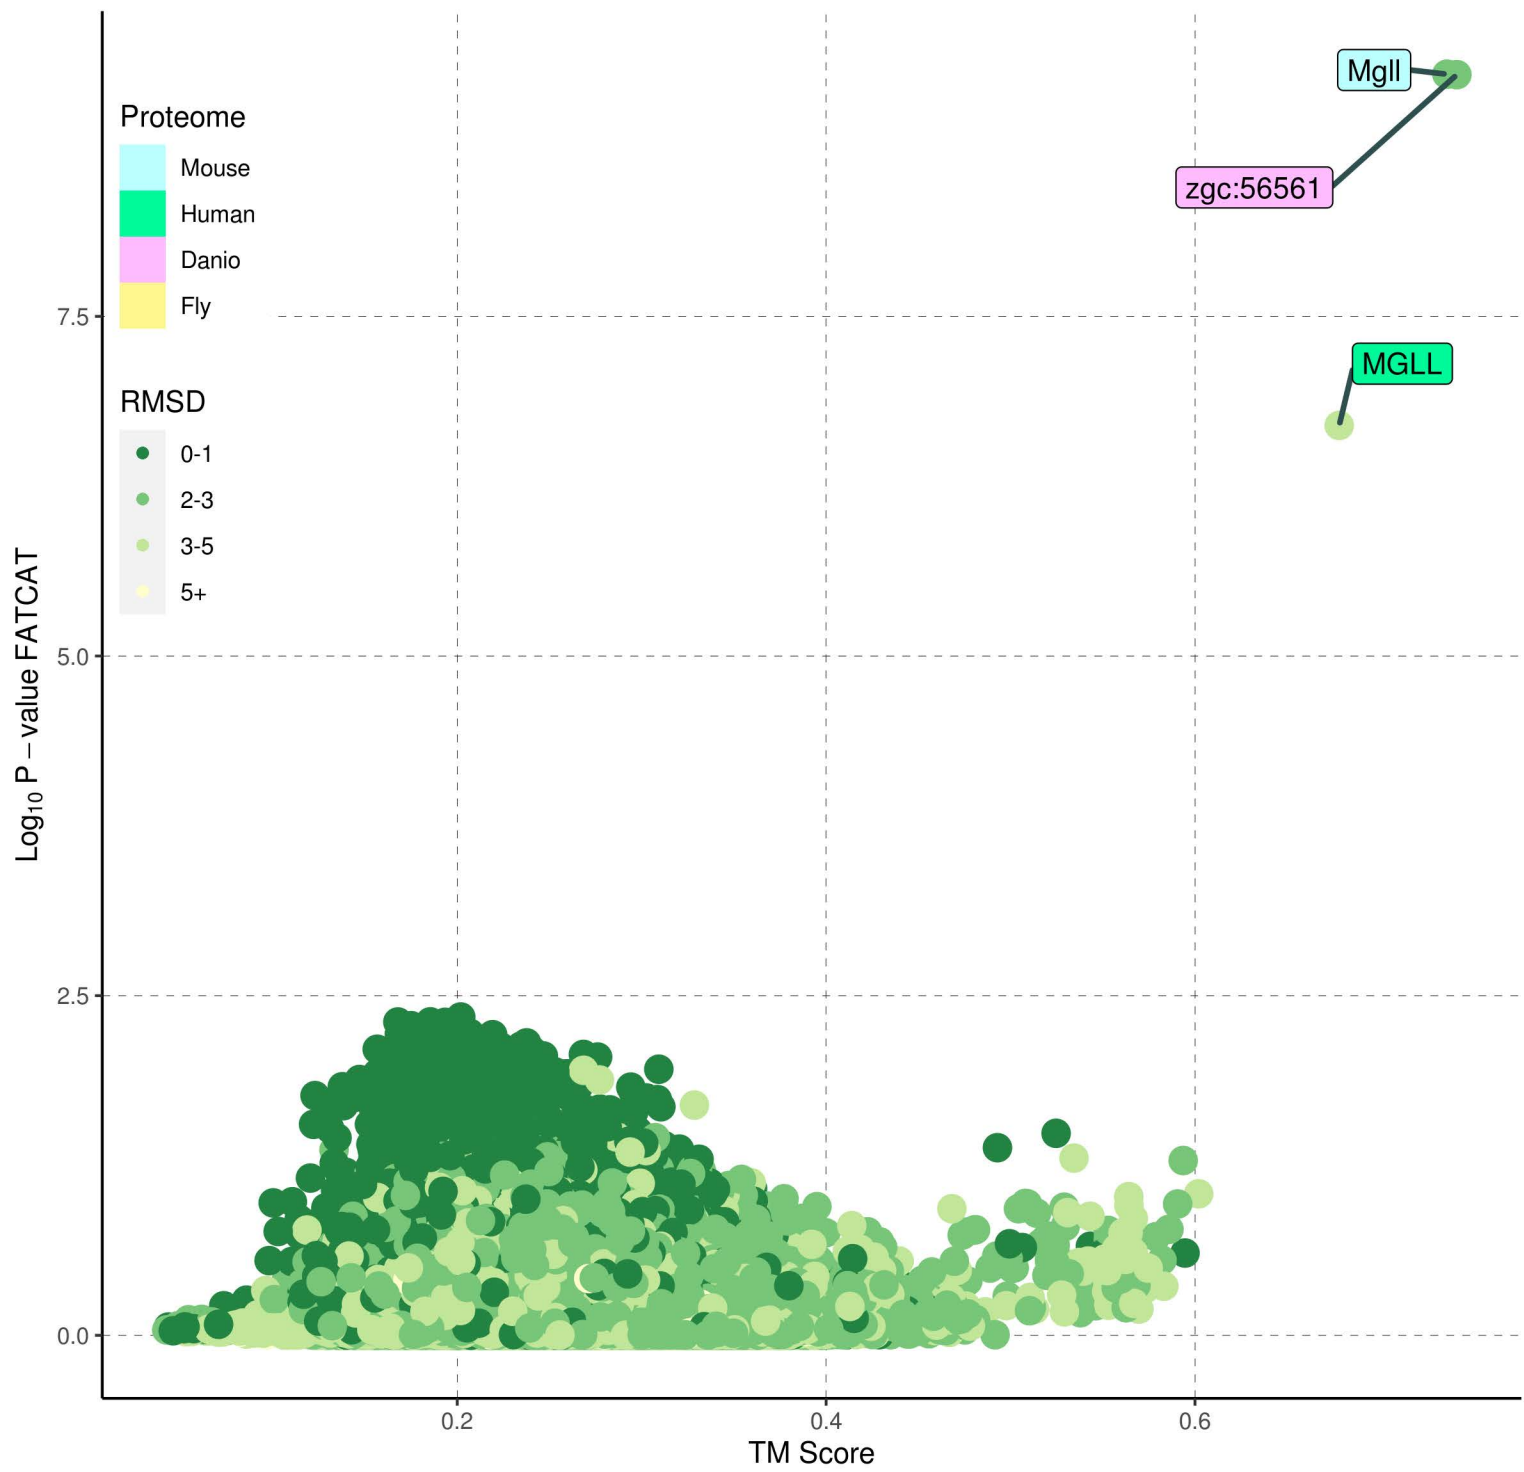



K7

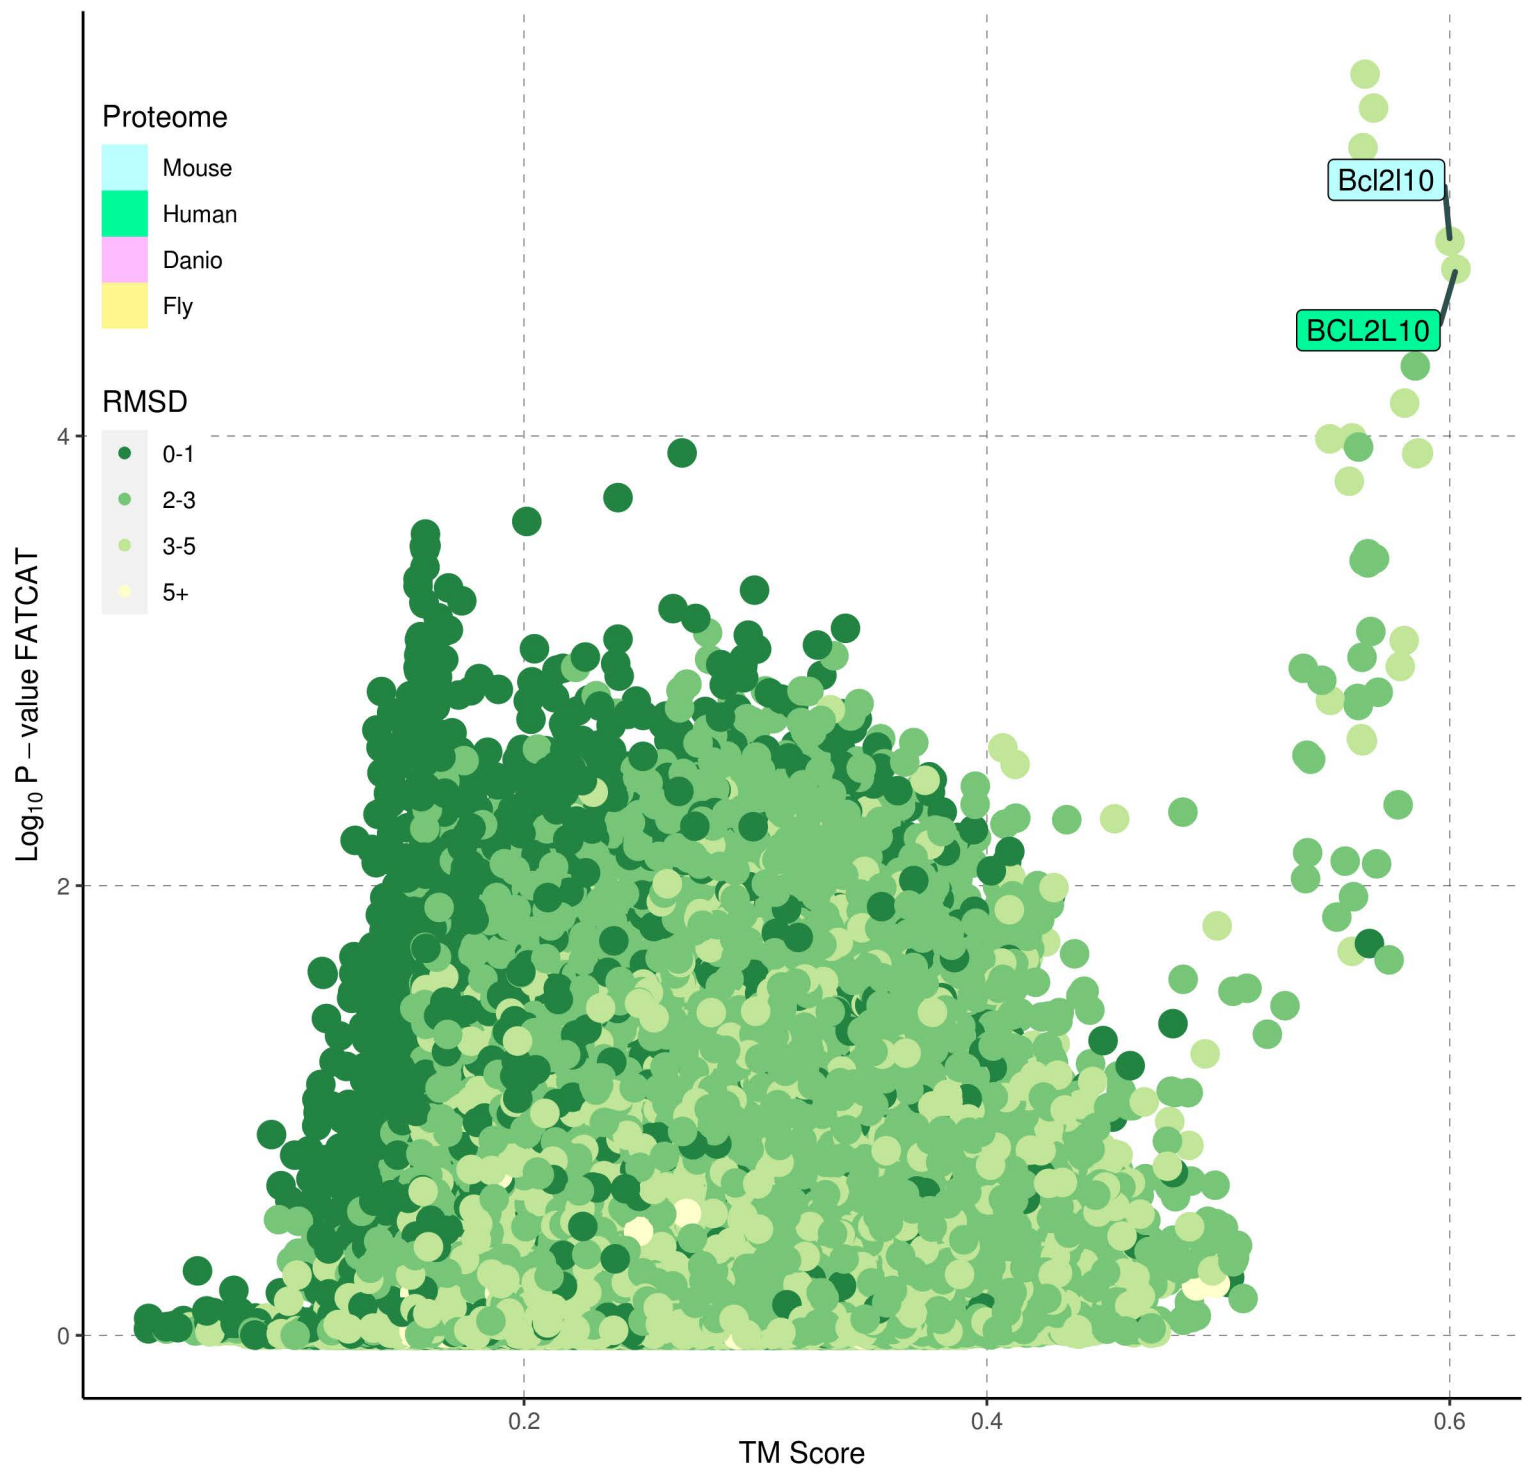

# KorfA : No hits, top-scoring values are indicated

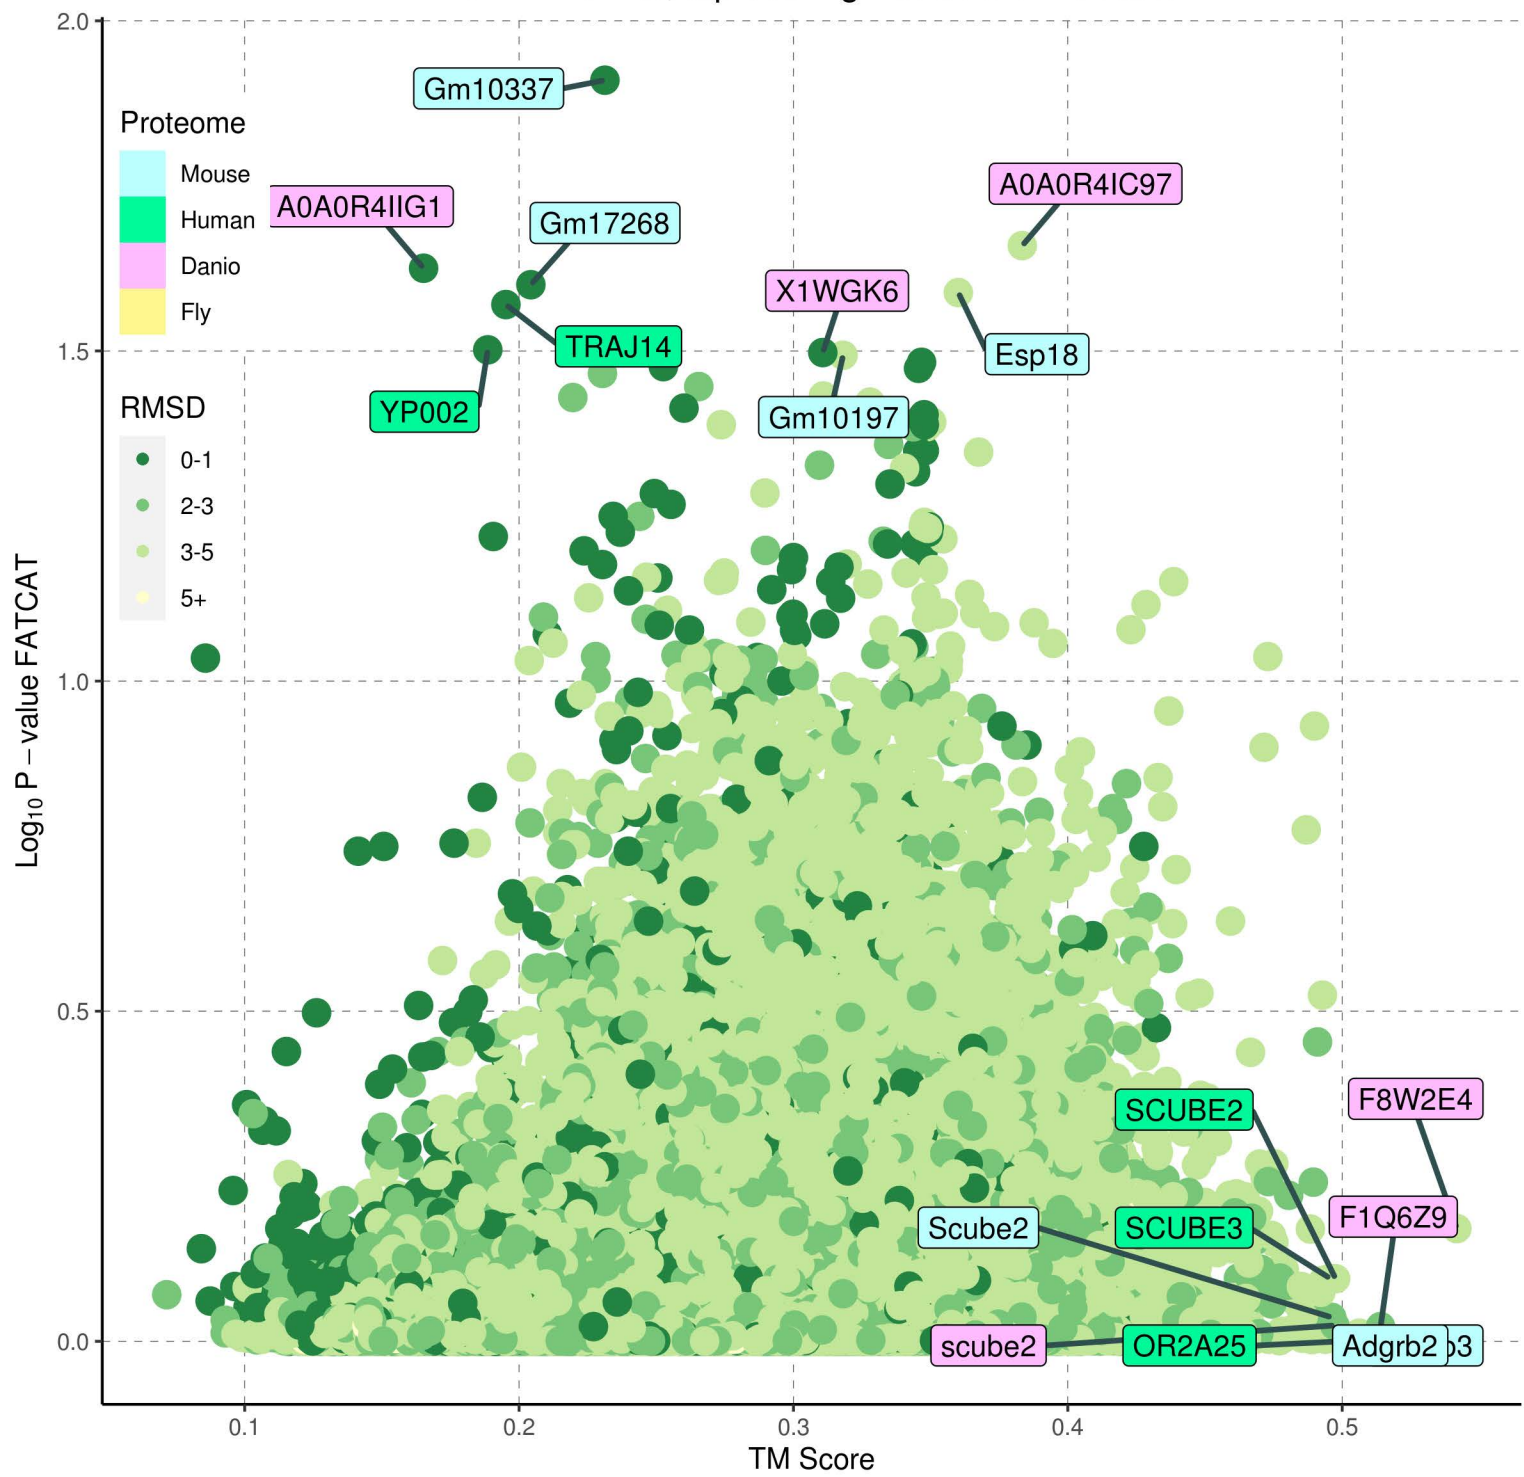



L1 : No hits, top-scoring values are indicated

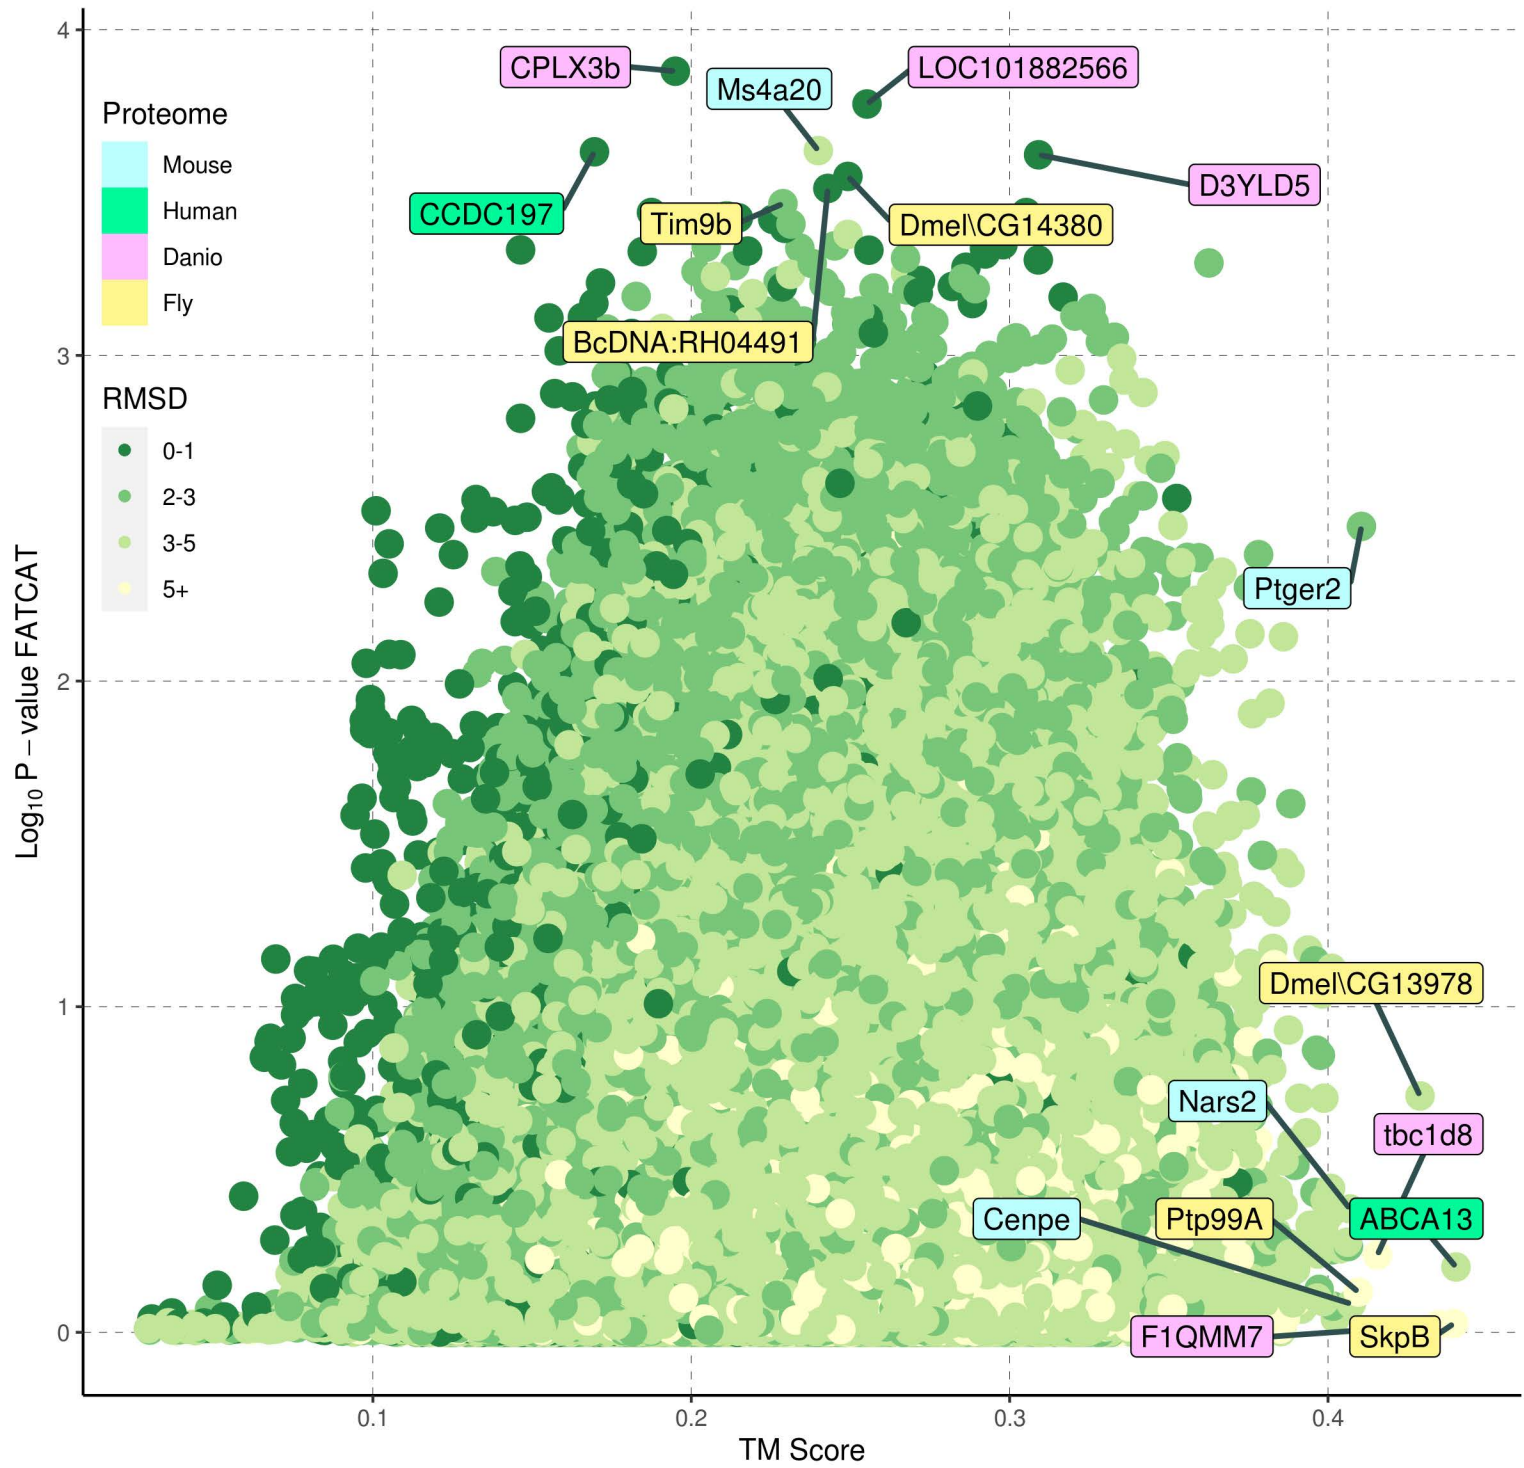



## L2

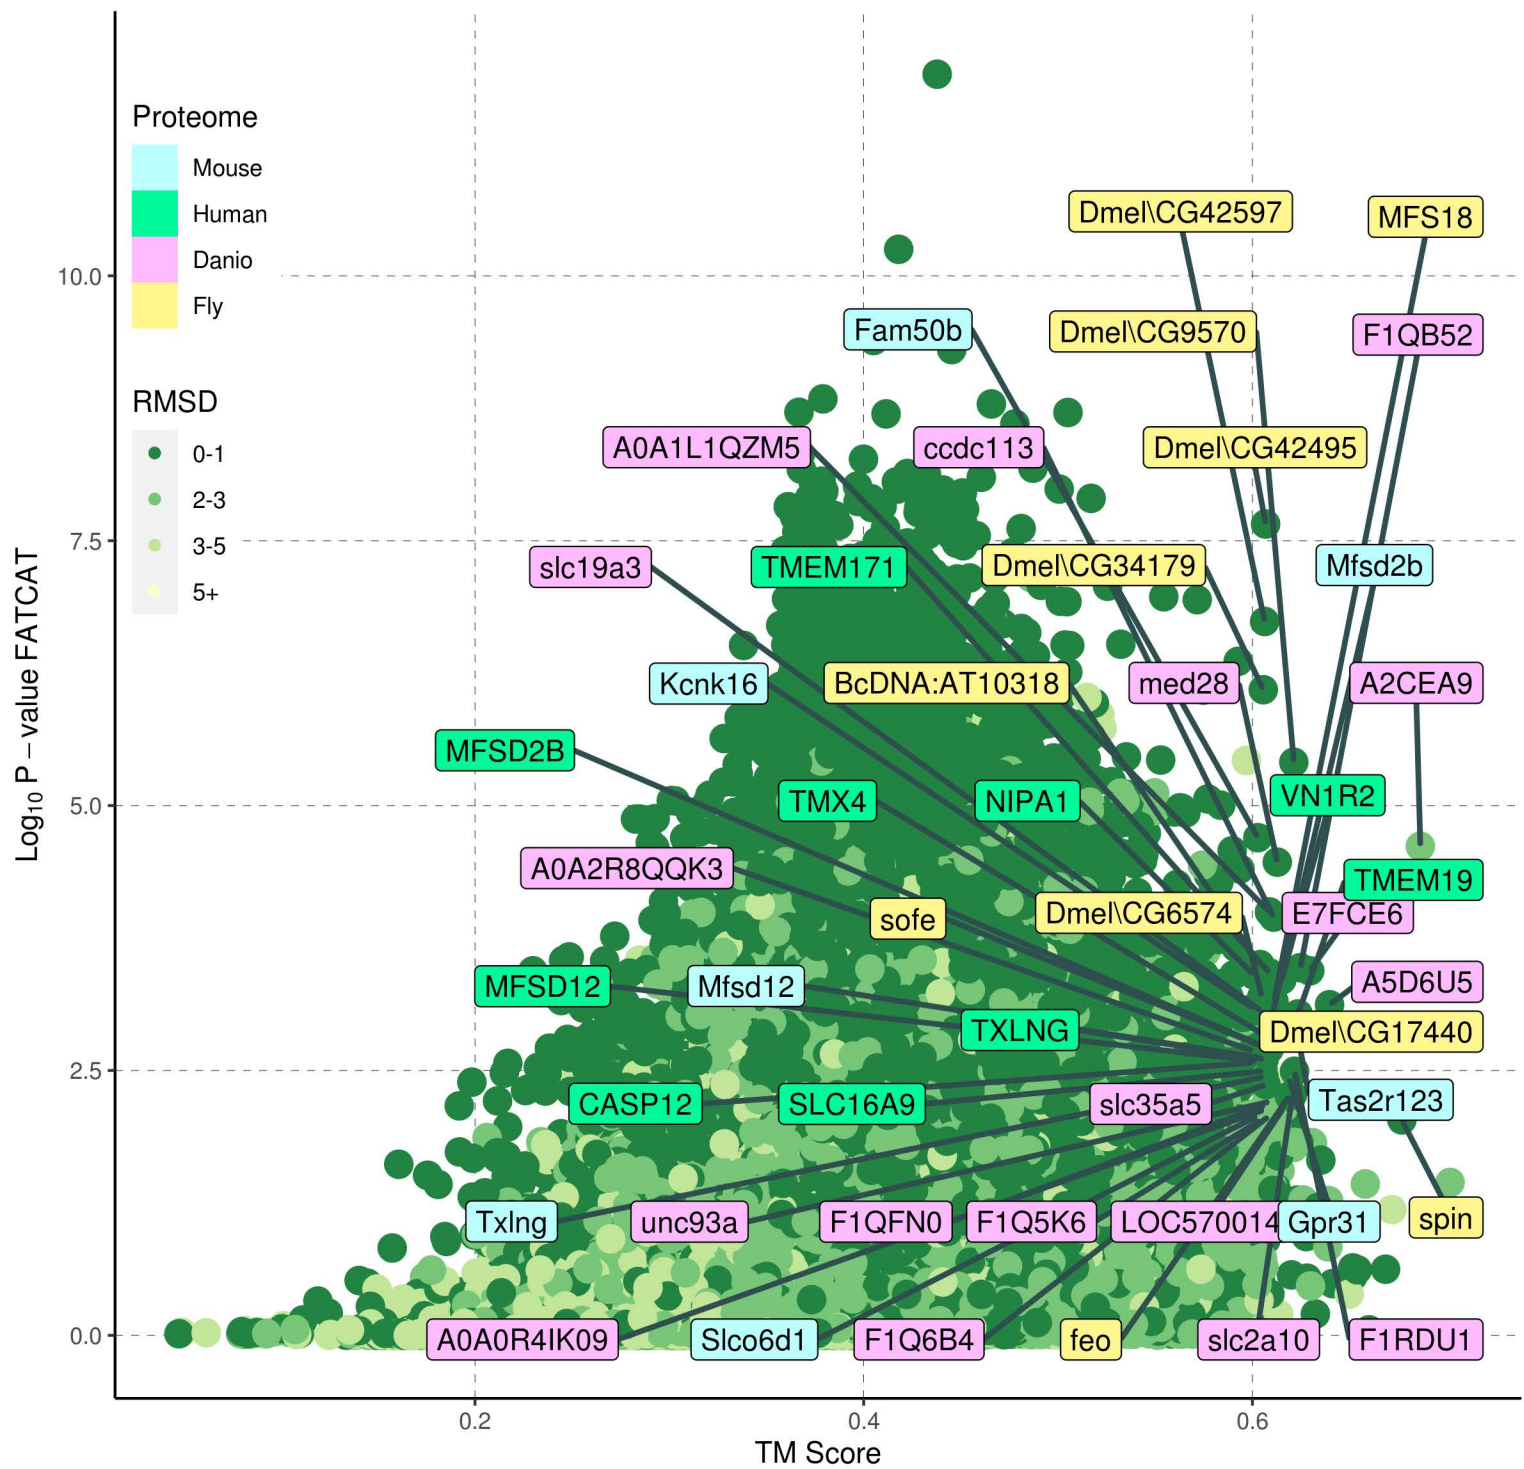

# L3 : No hits, top-scoring values are indicated

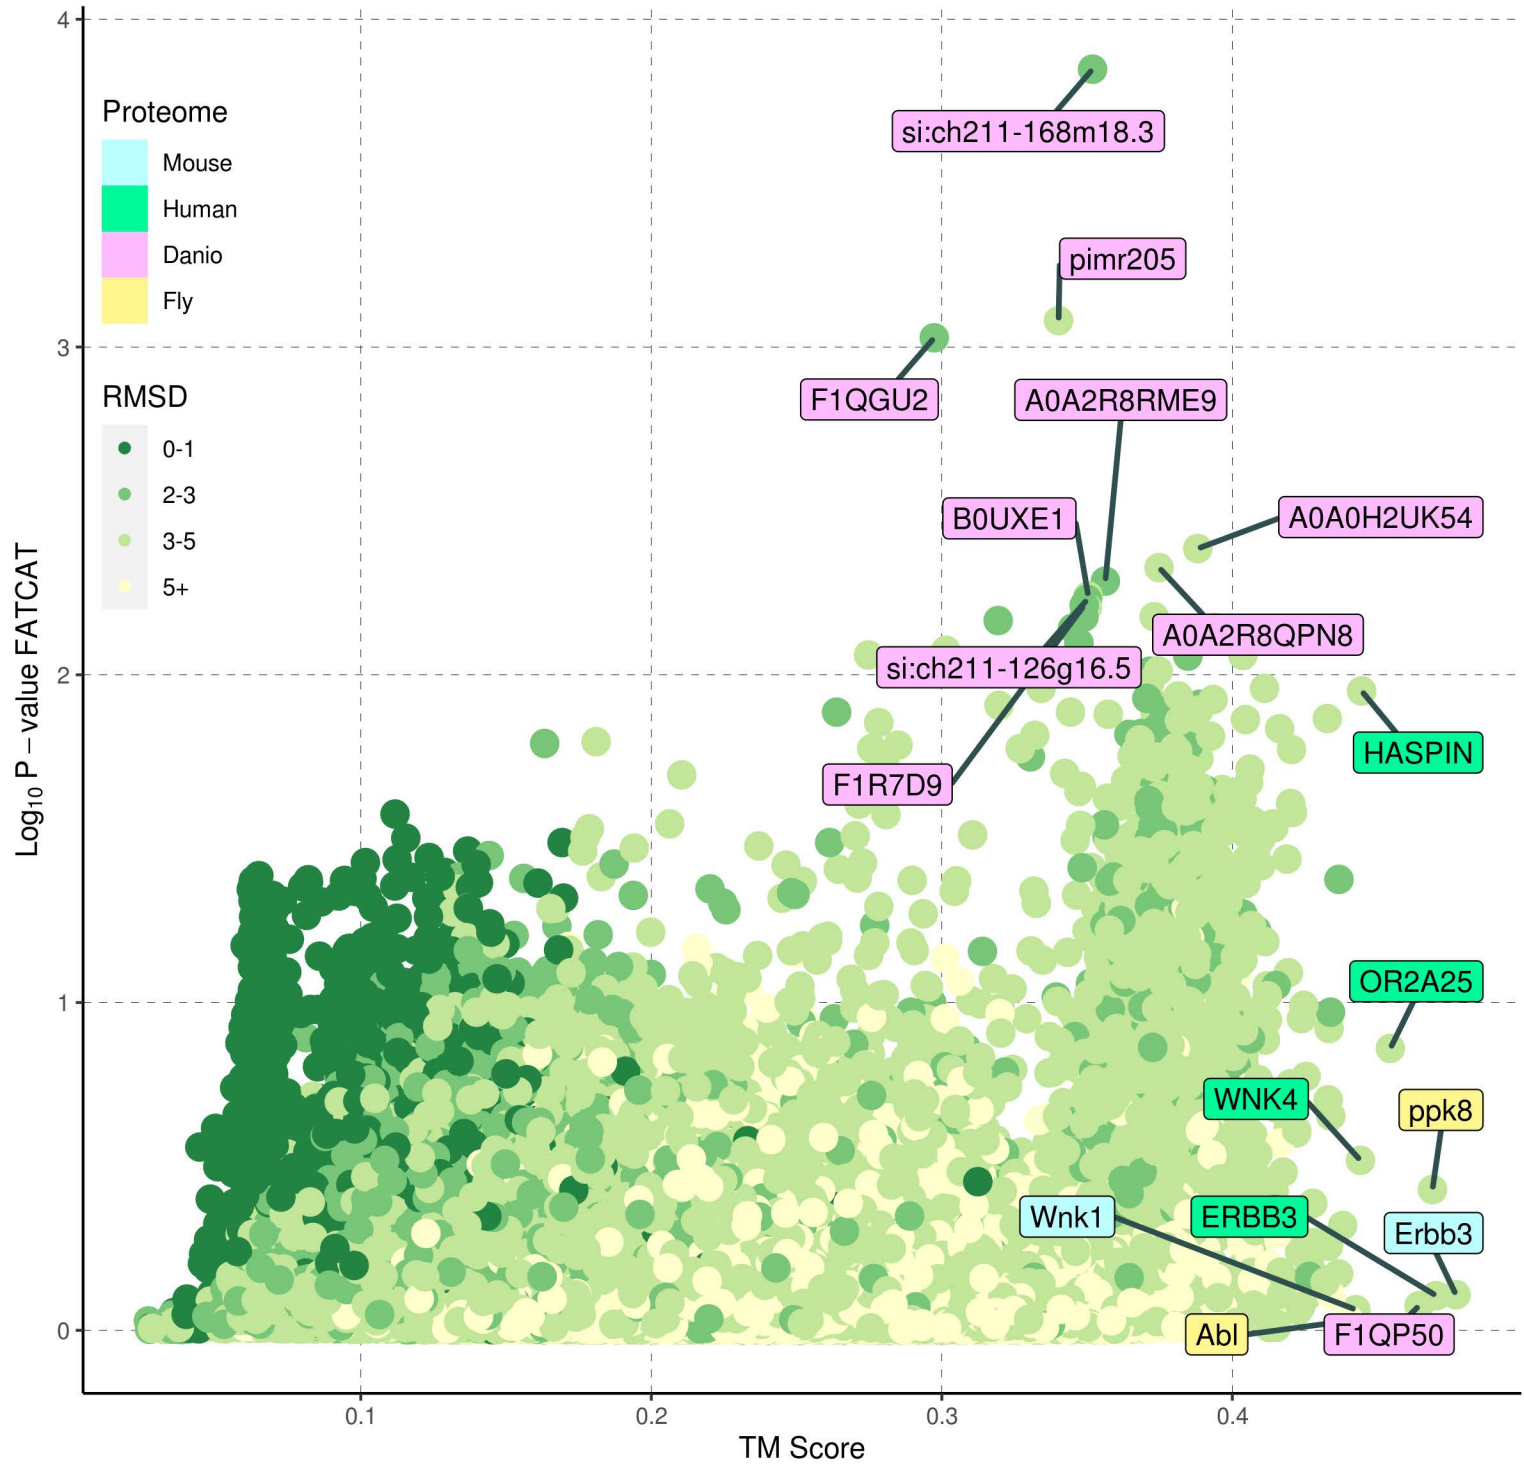

L4 : No hits, top-scoring values are indicated

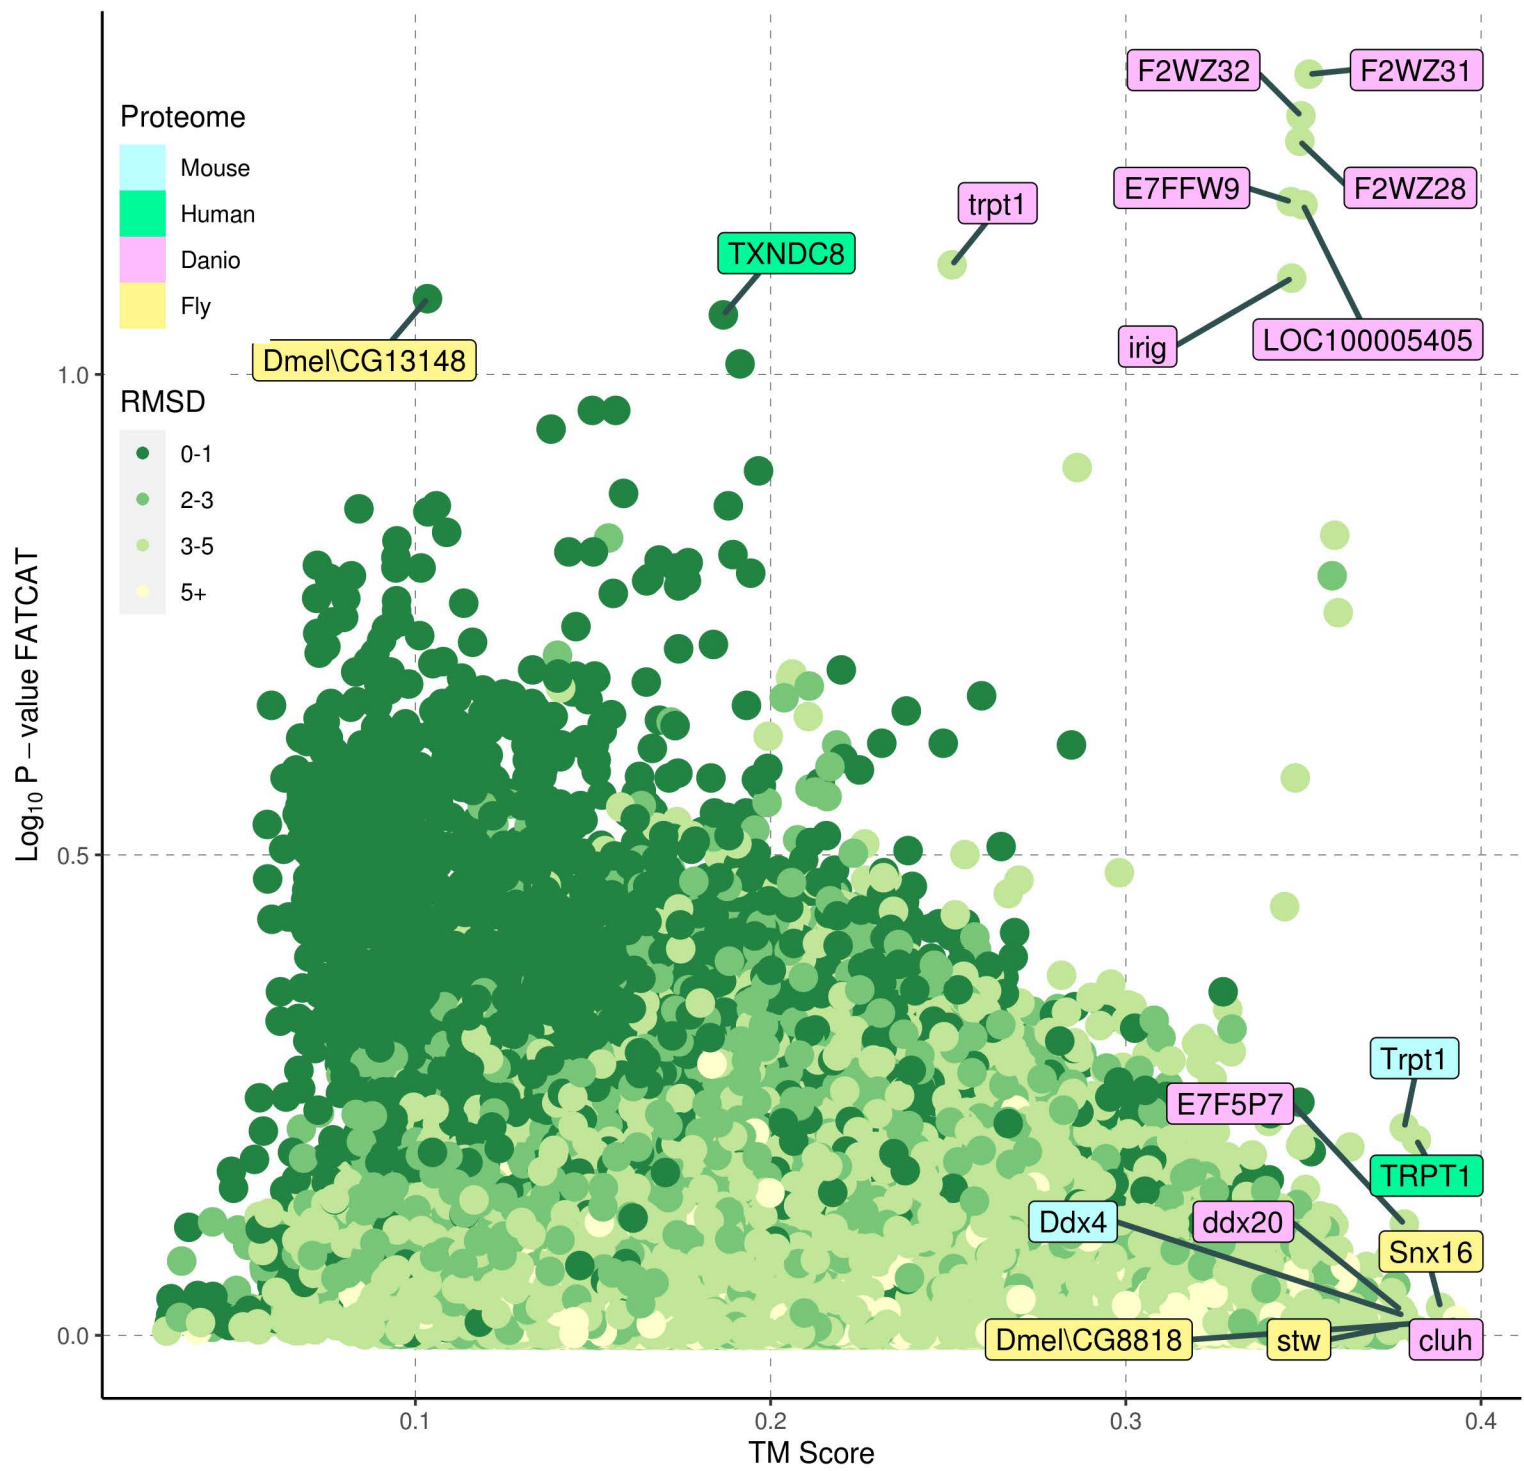

# L5 : No hits, top-scoring values are indicated

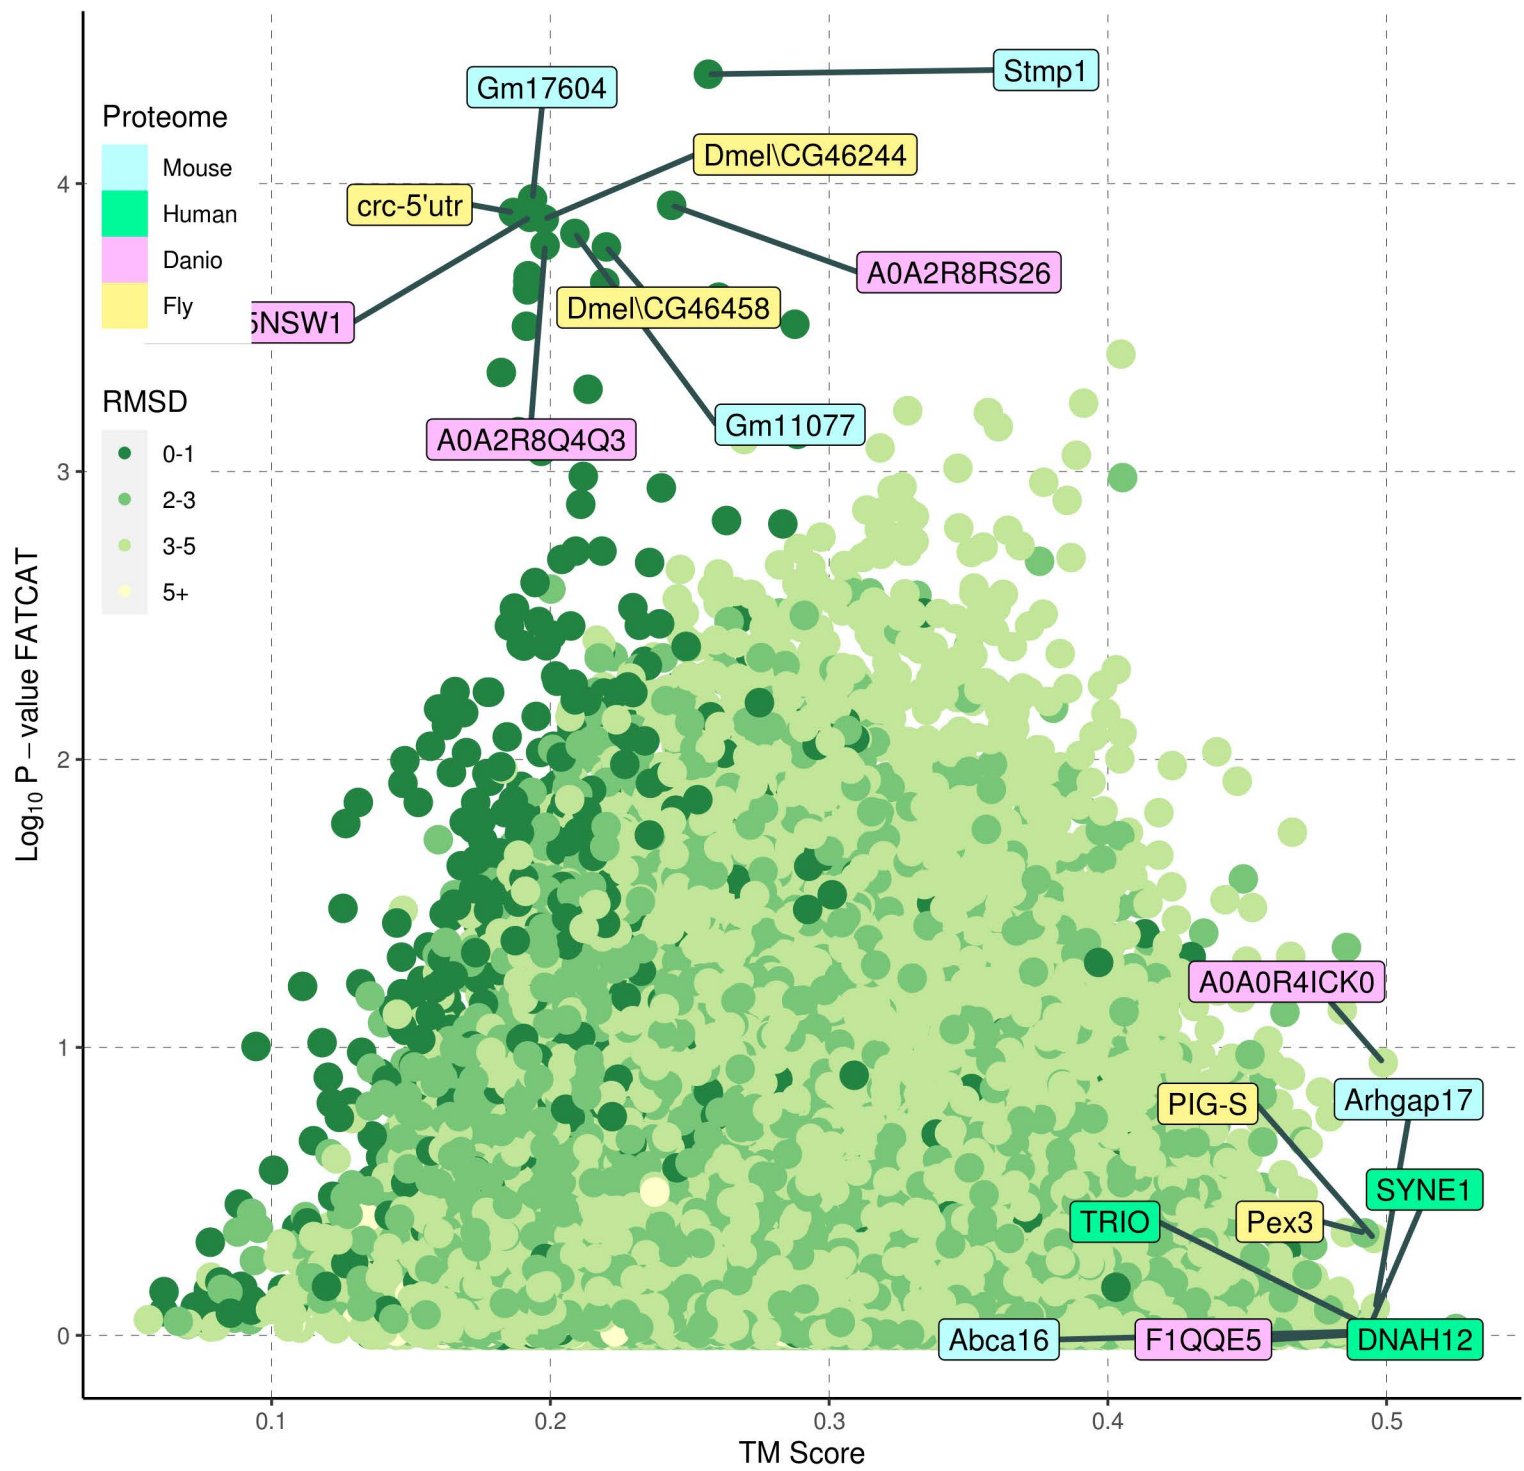

## M1

Log<sub>10</sub> P -value FATCAT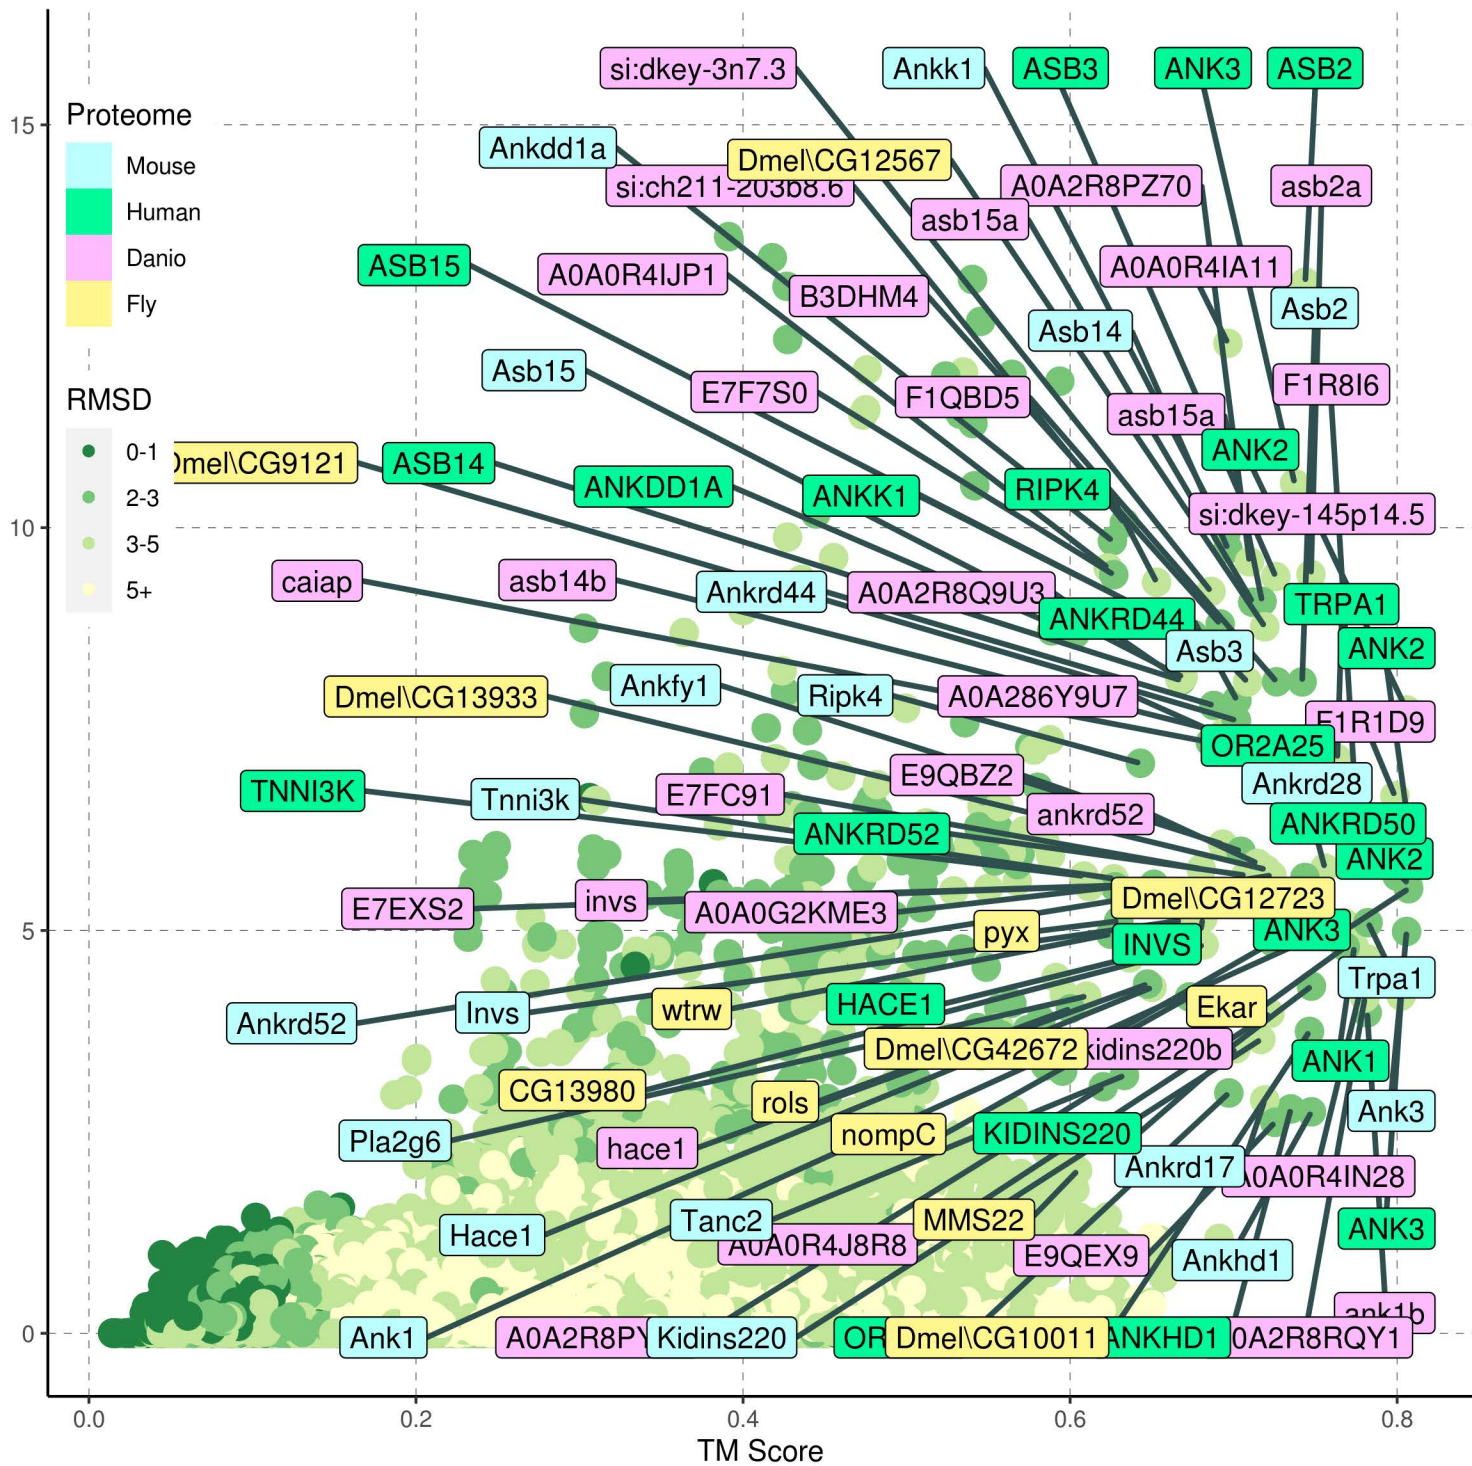

M2 : No hits, top-scoring values are indicated

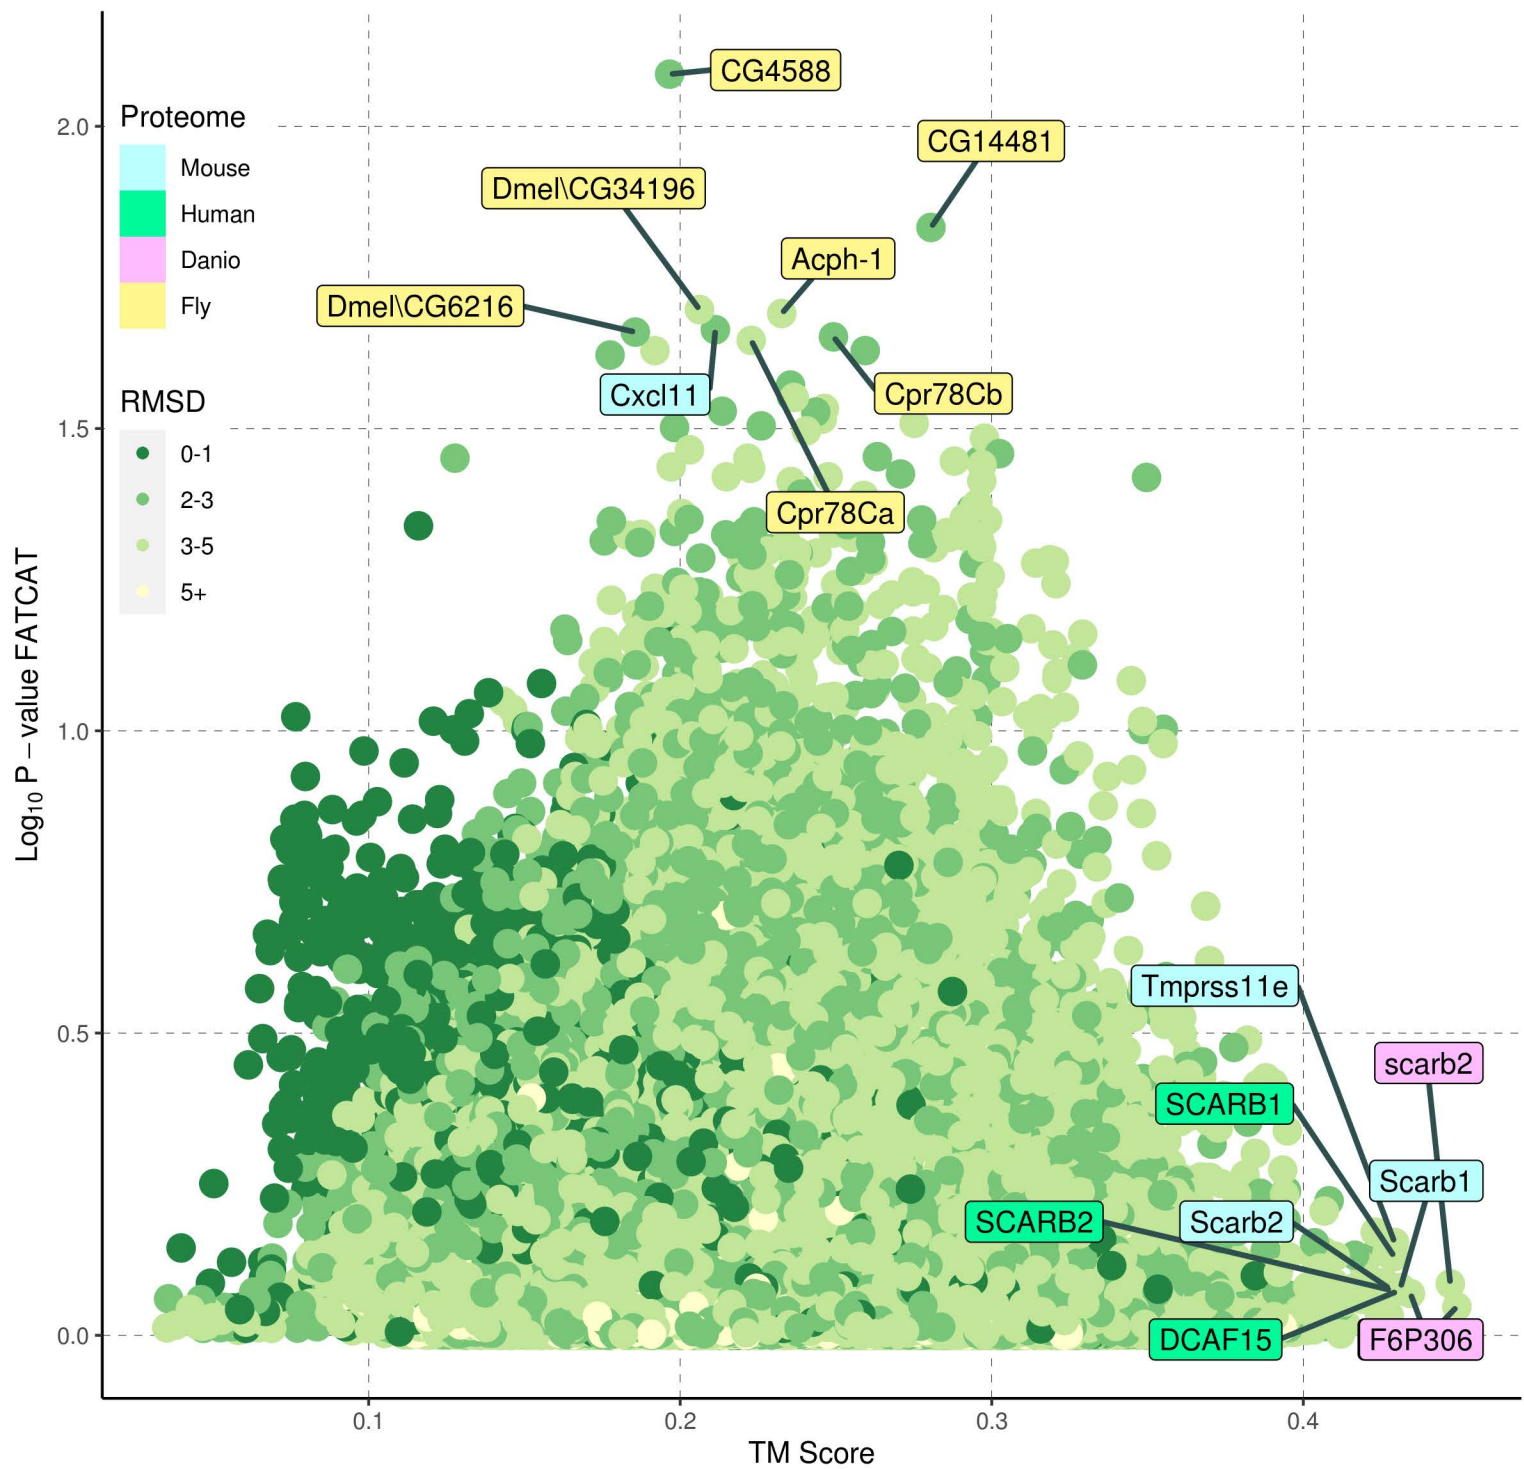

N1

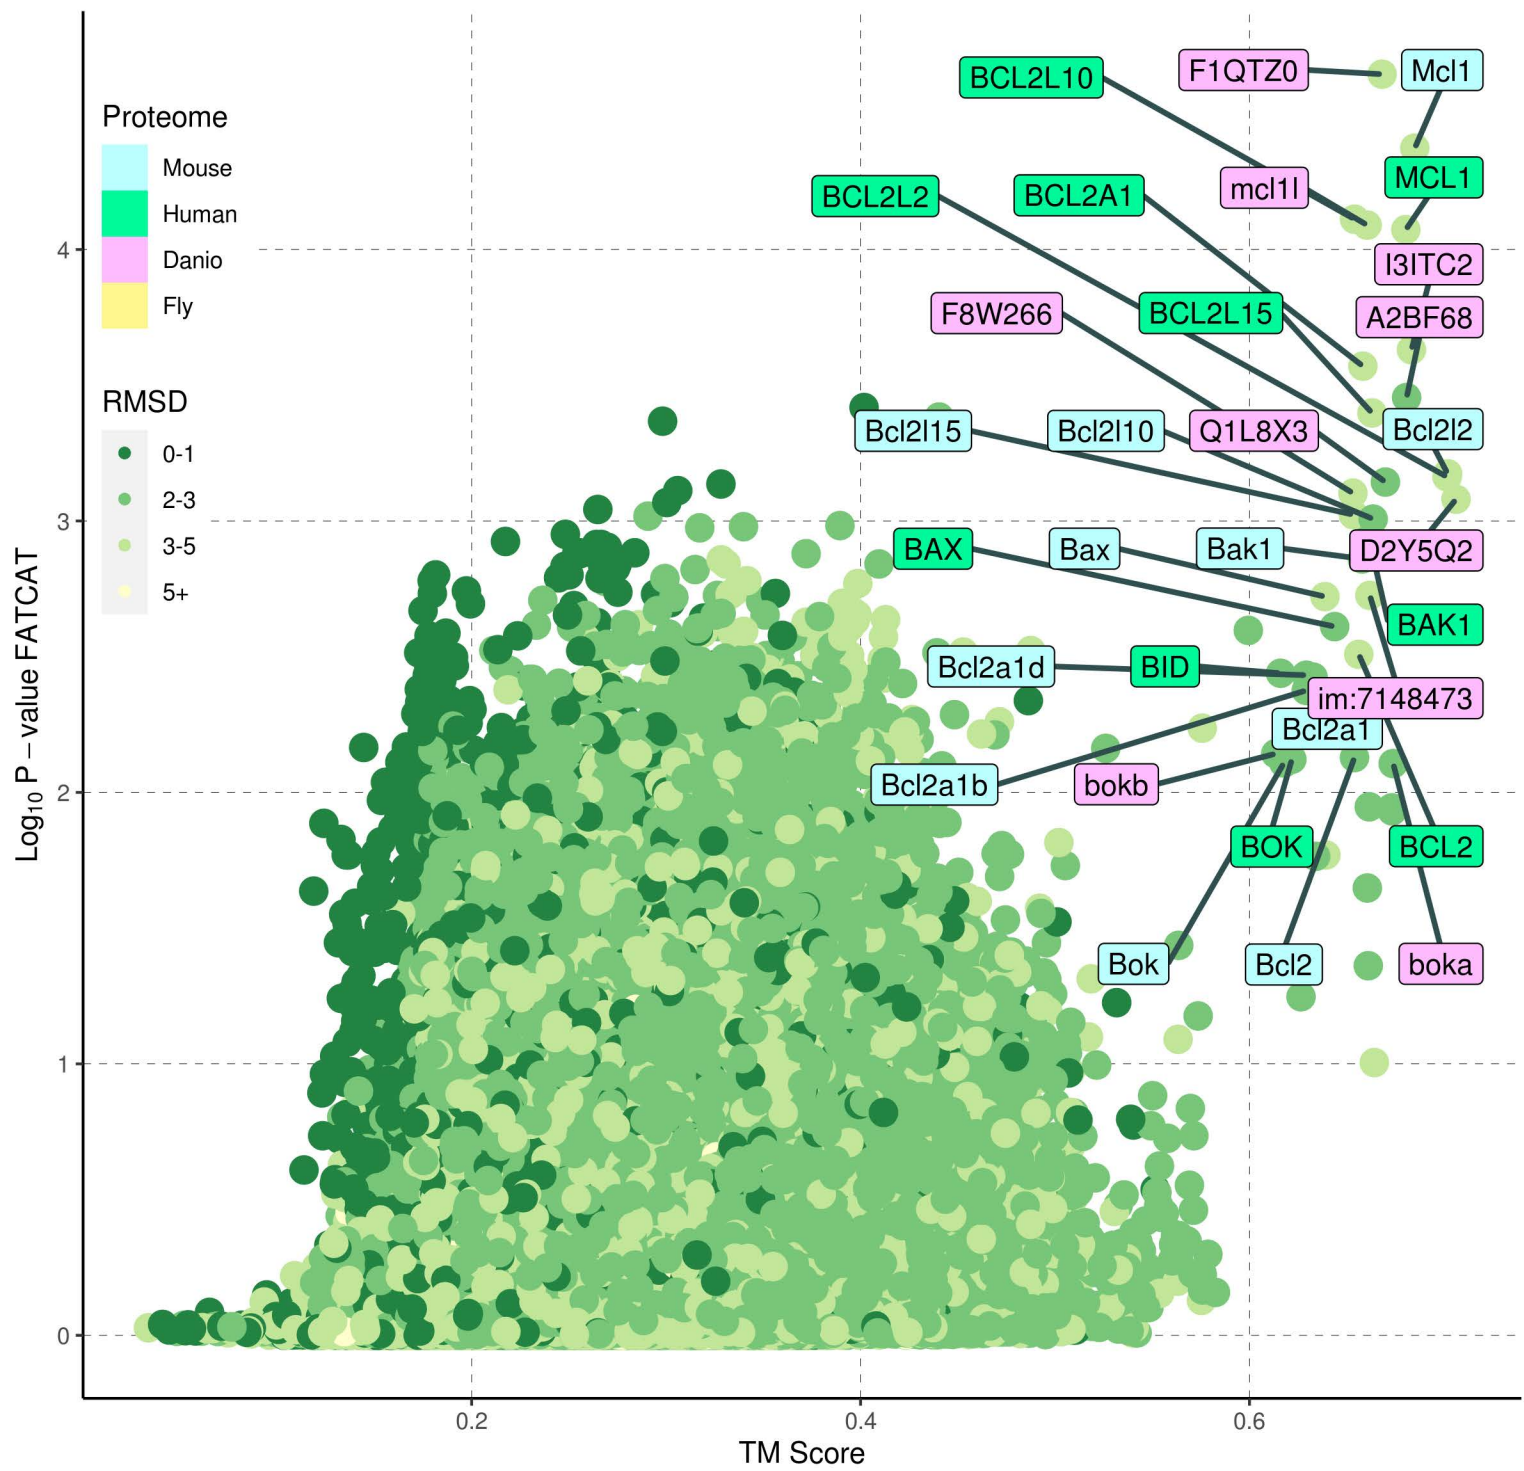

N2 : No hits, top-scoring values are indicated

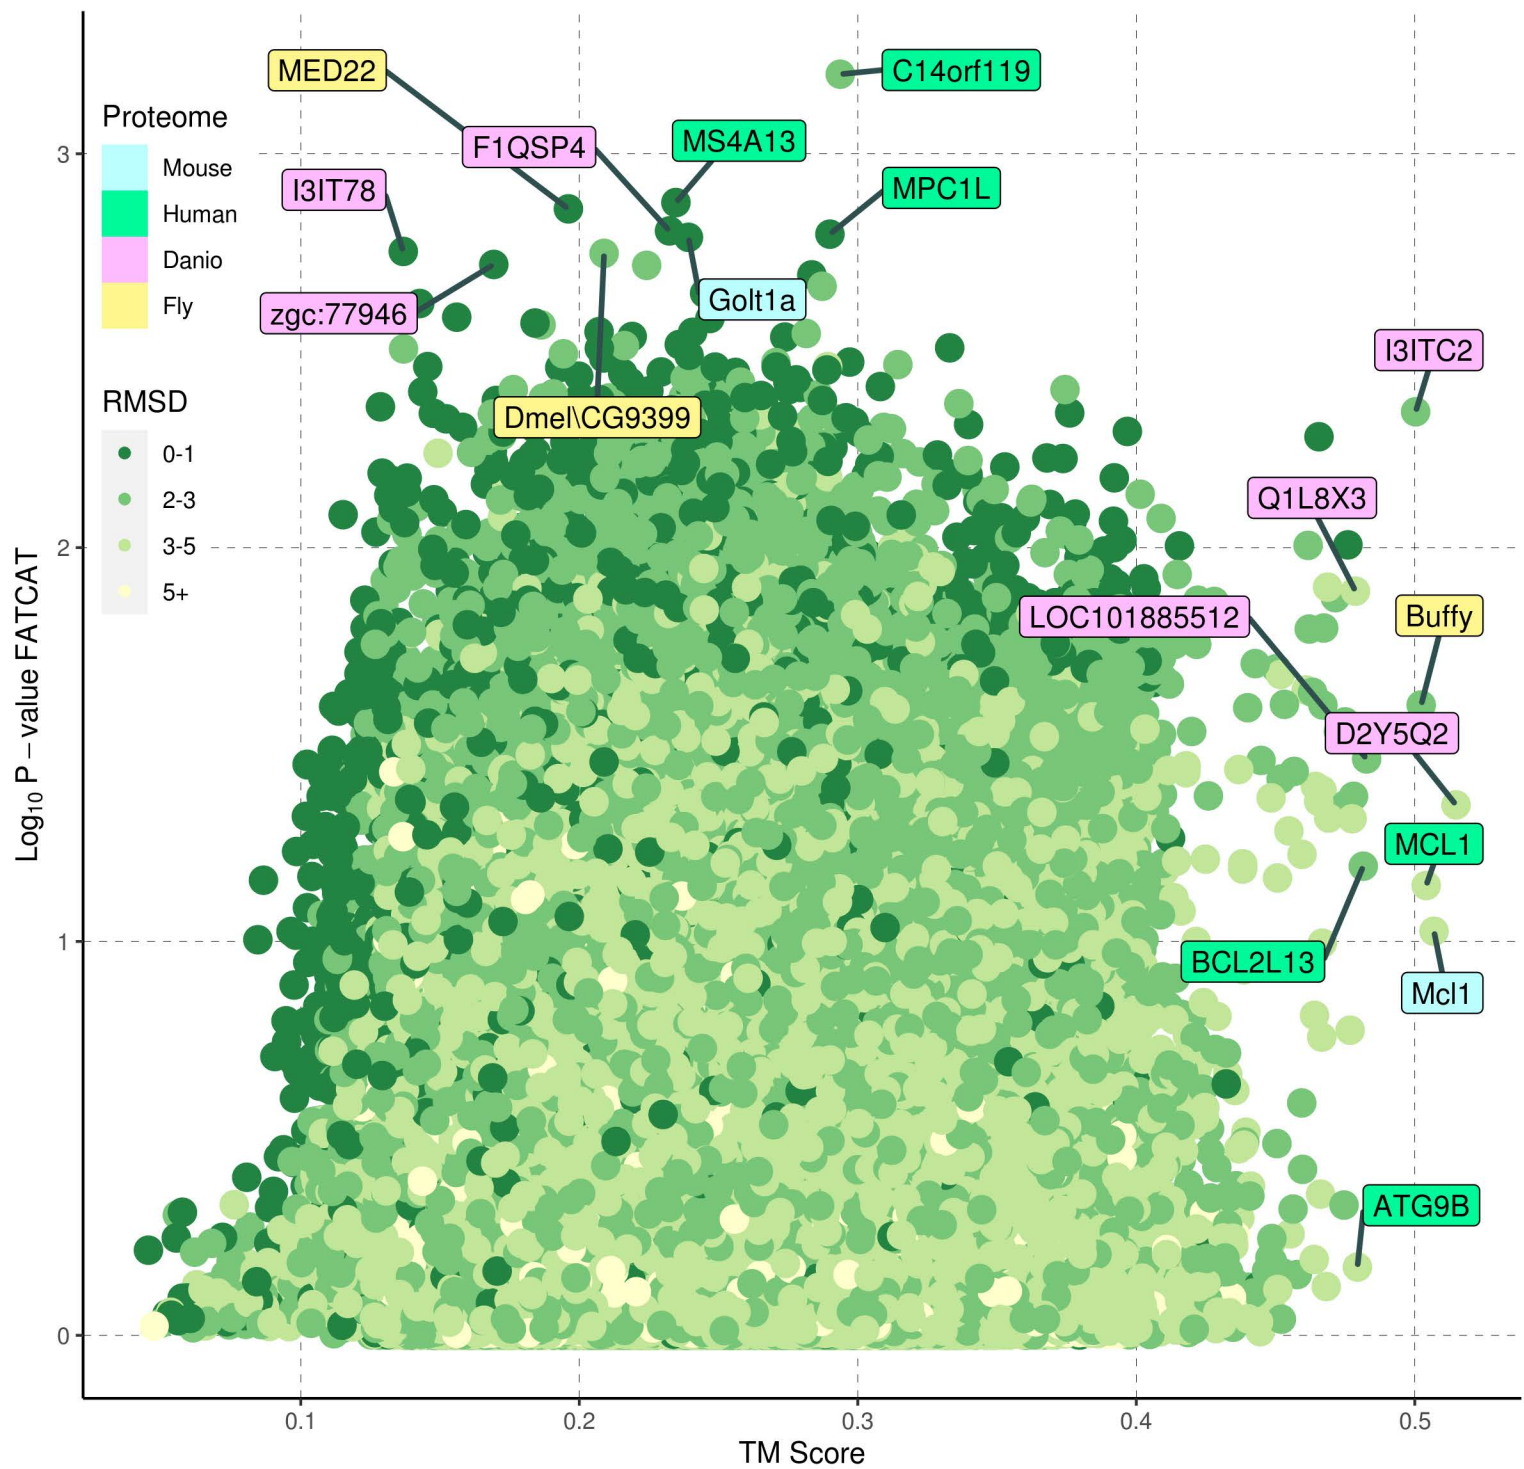



O1 : No hits, top-scoring values are indicated

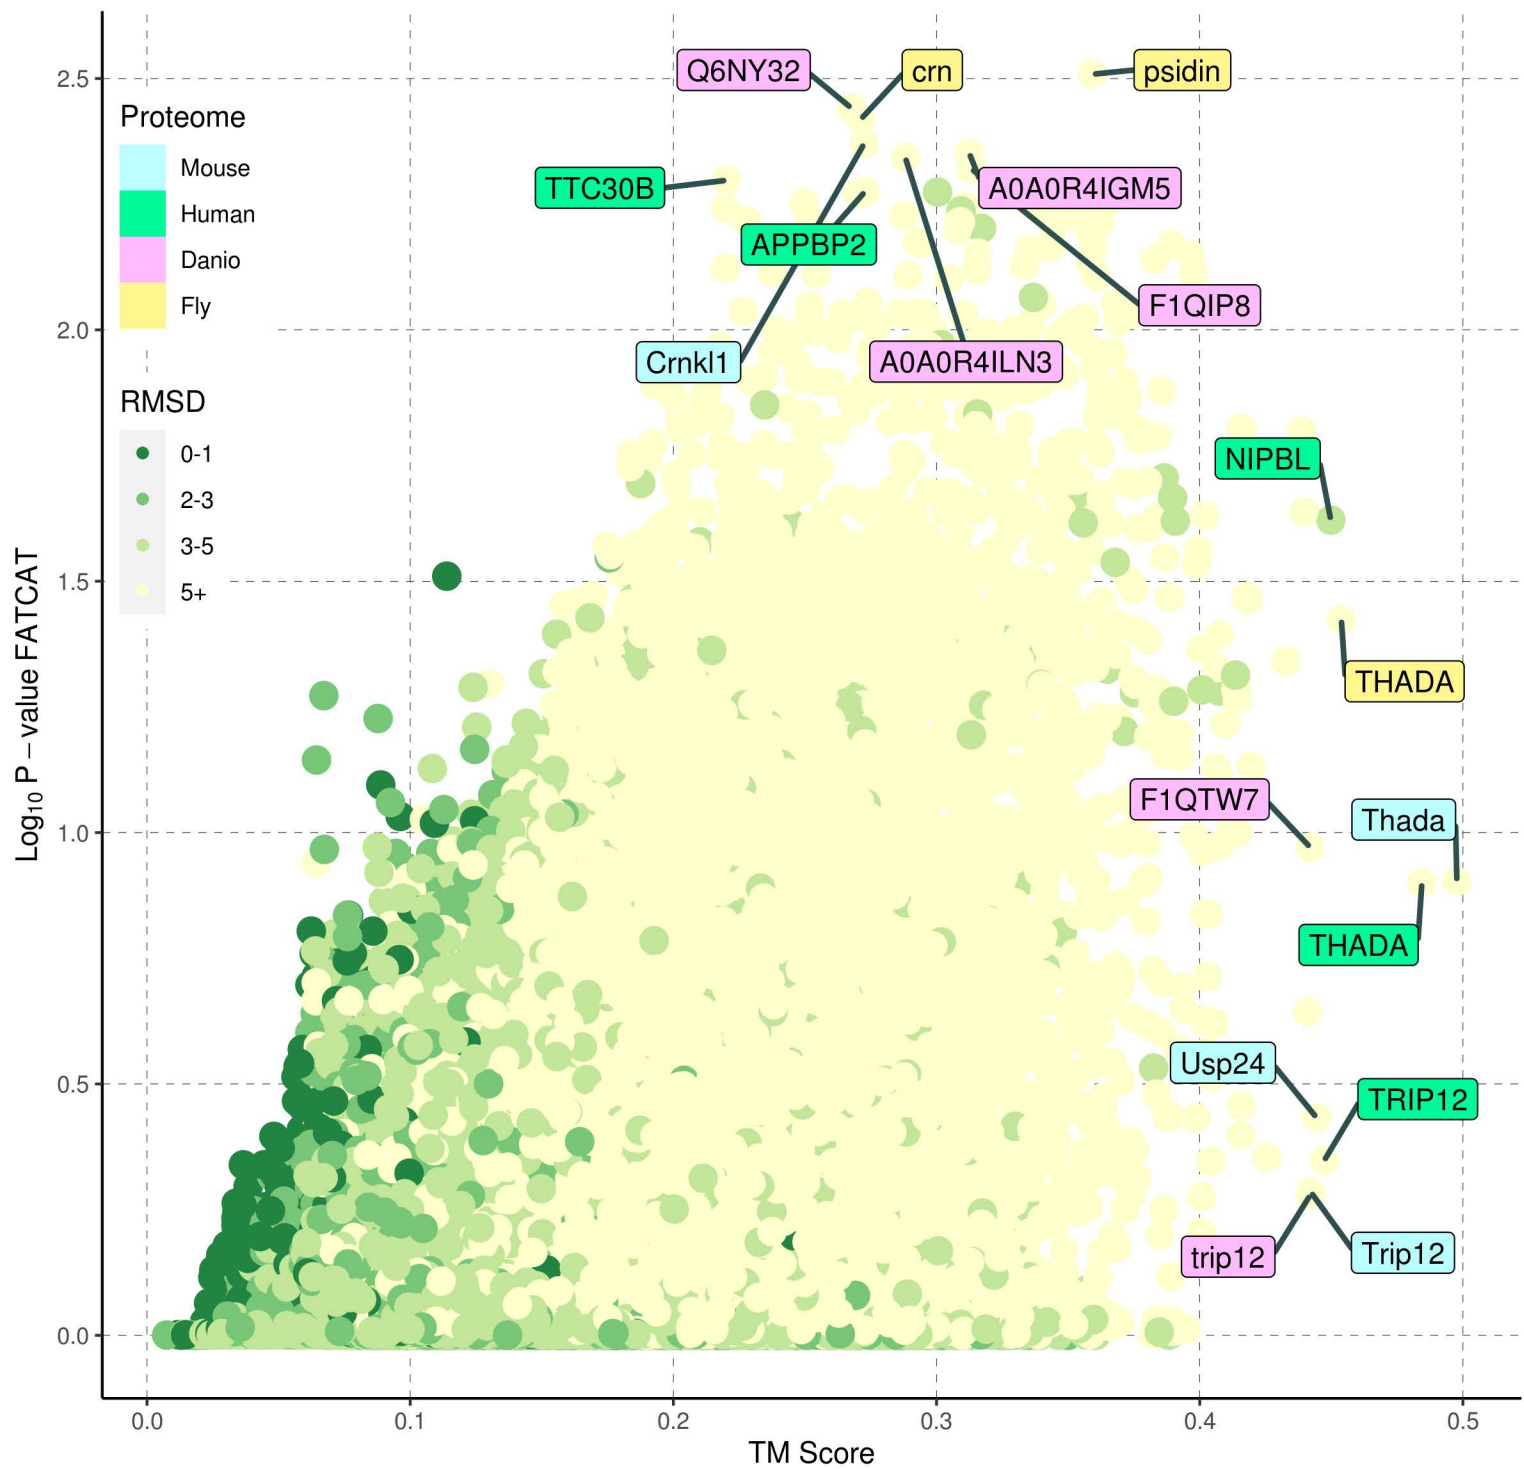

O2

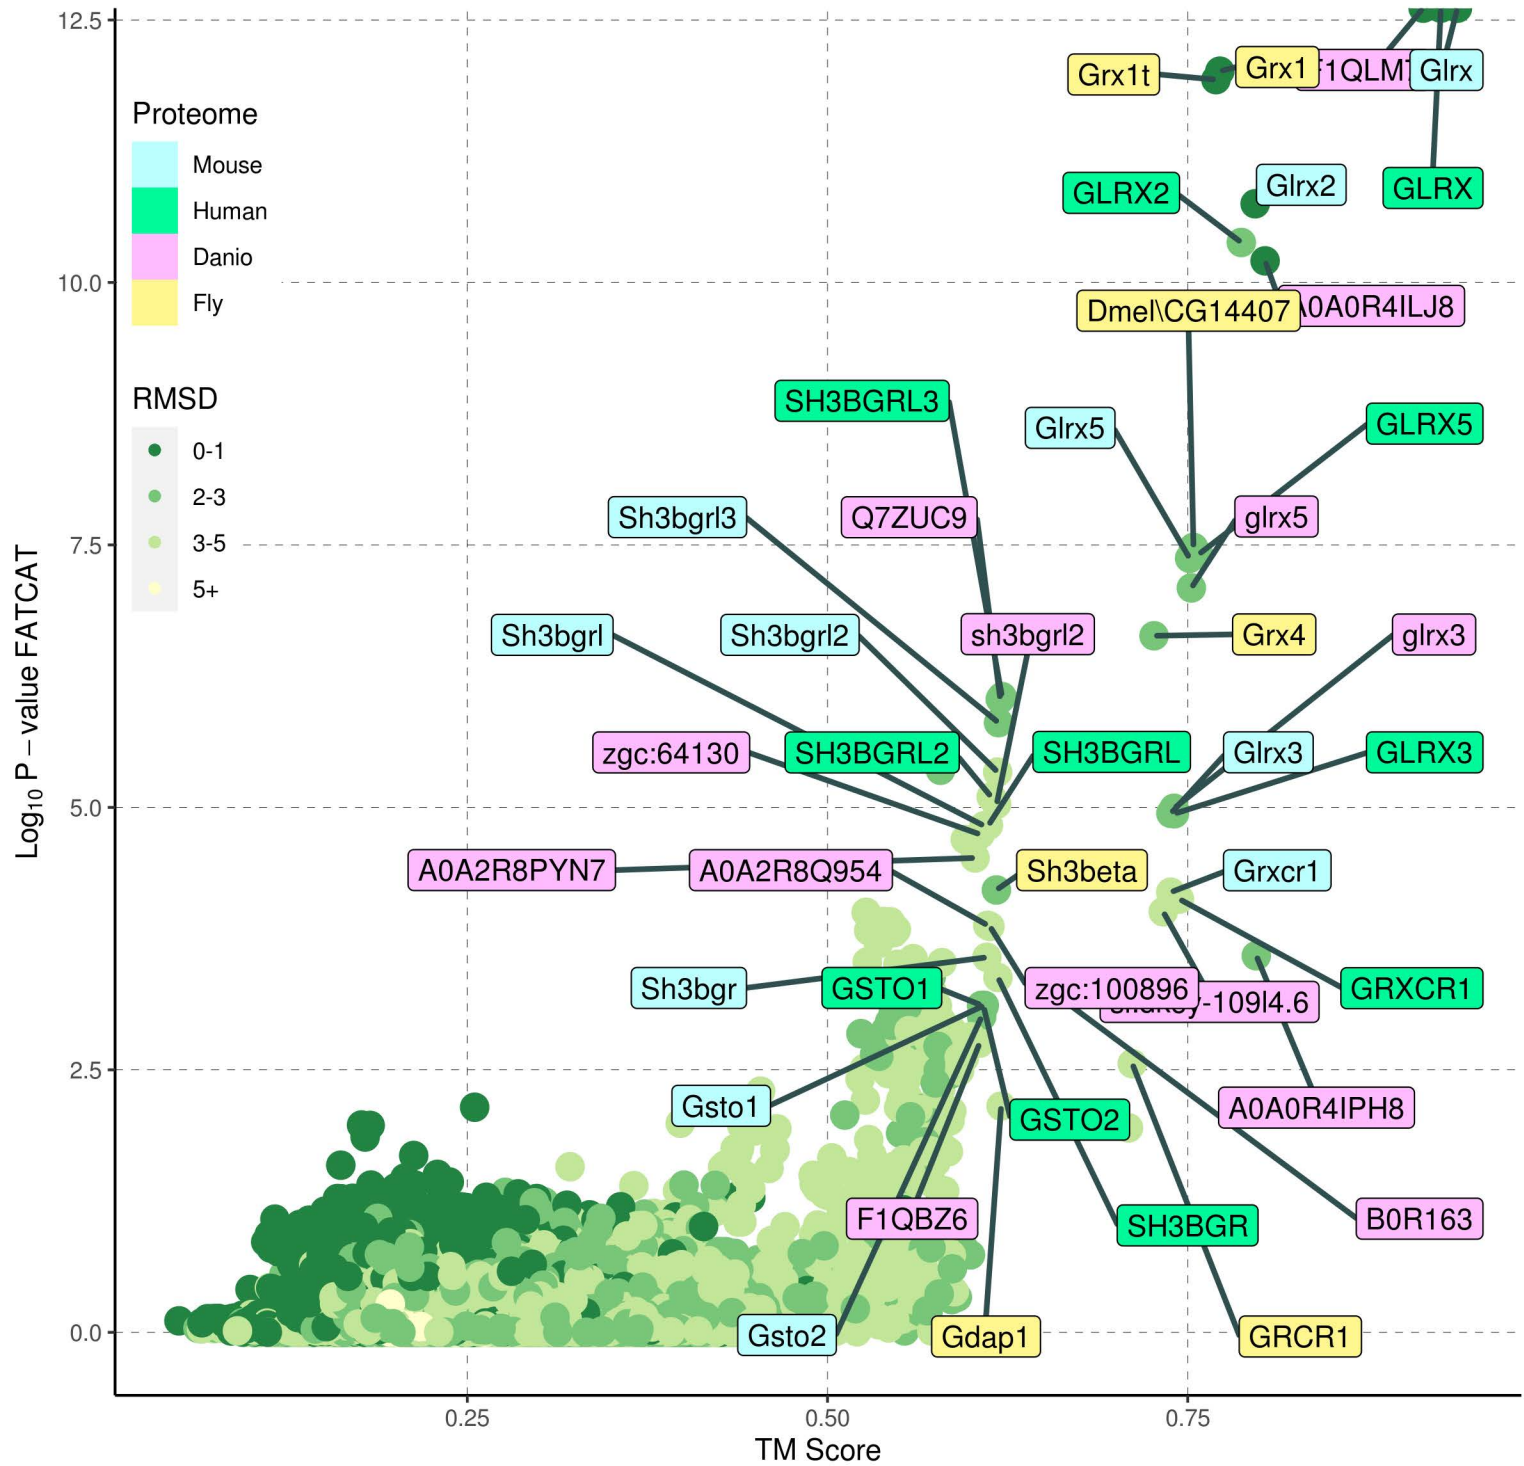

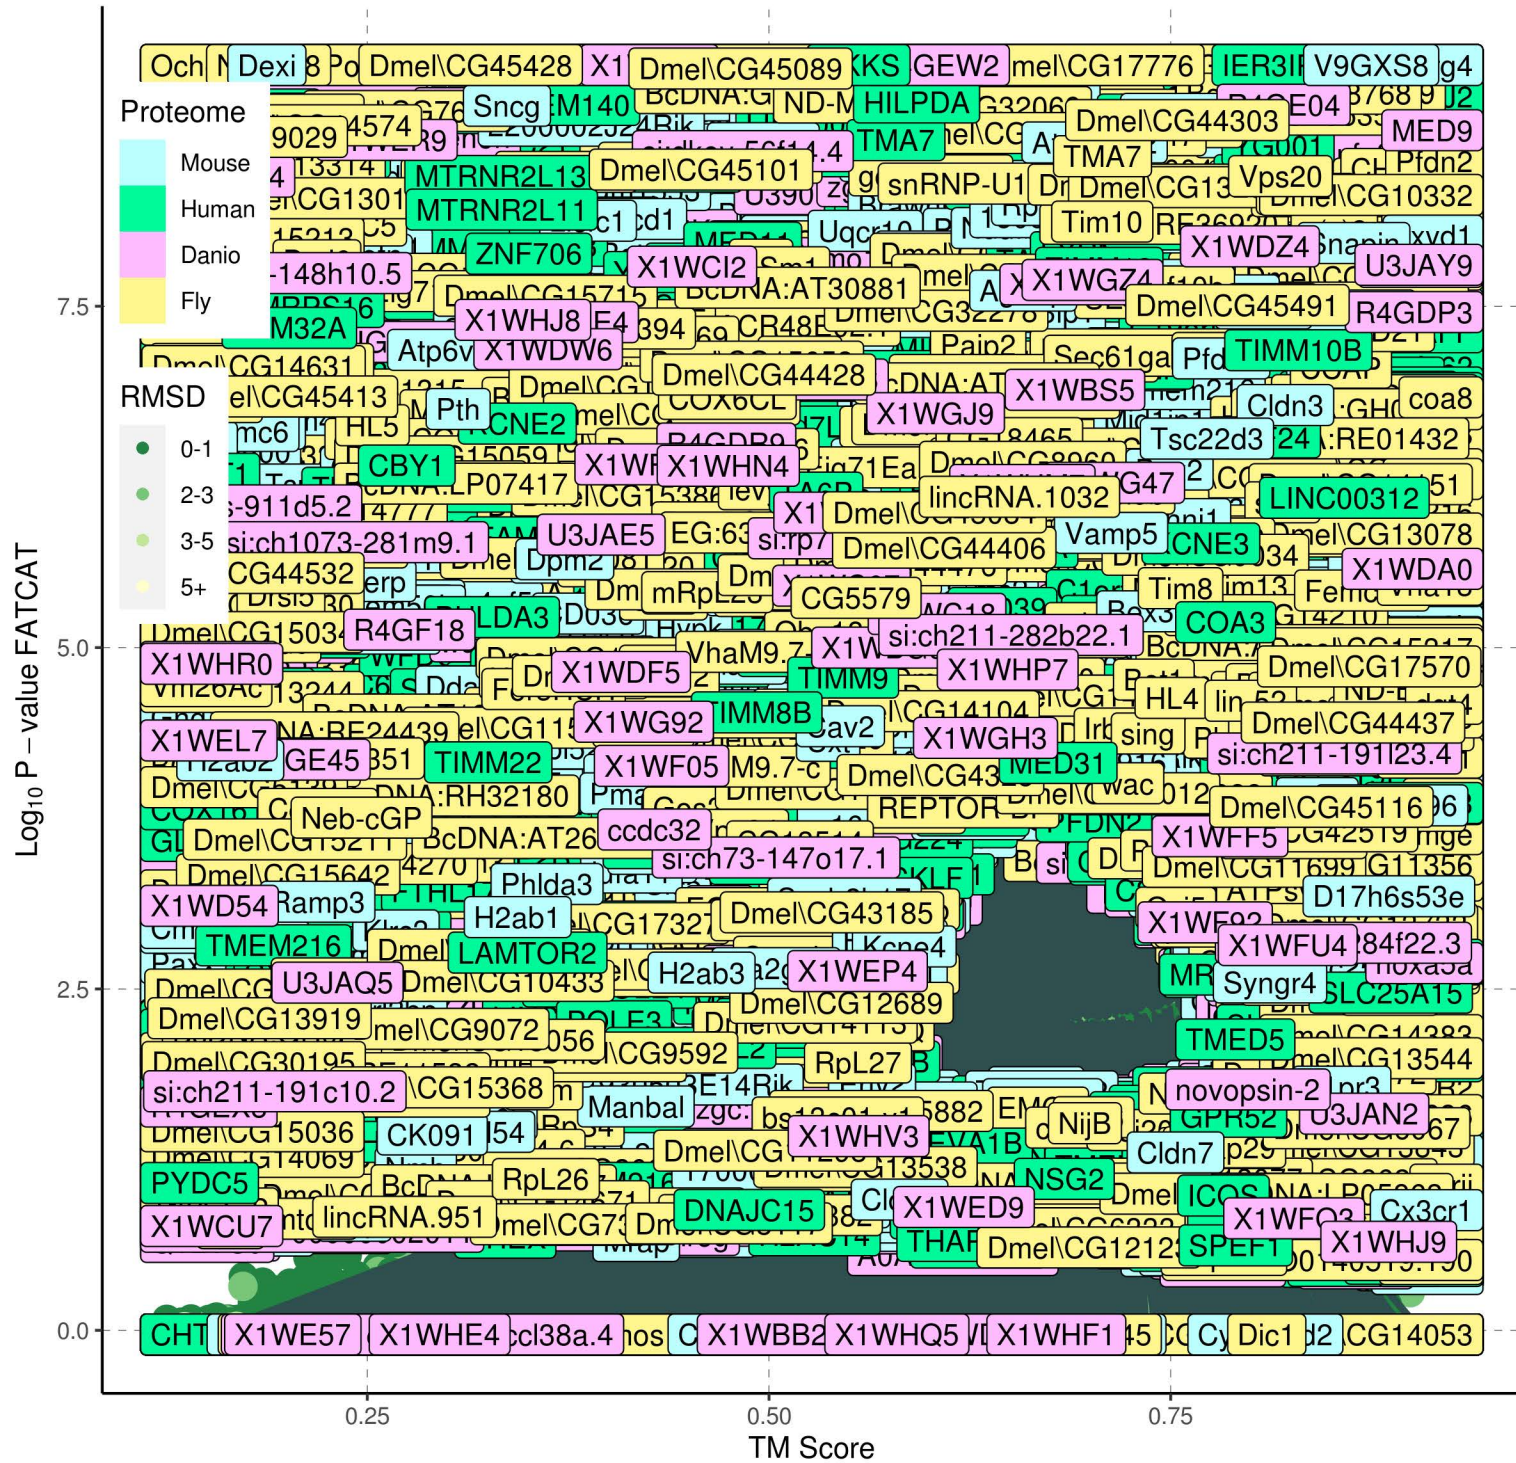



# U8p7kDaA

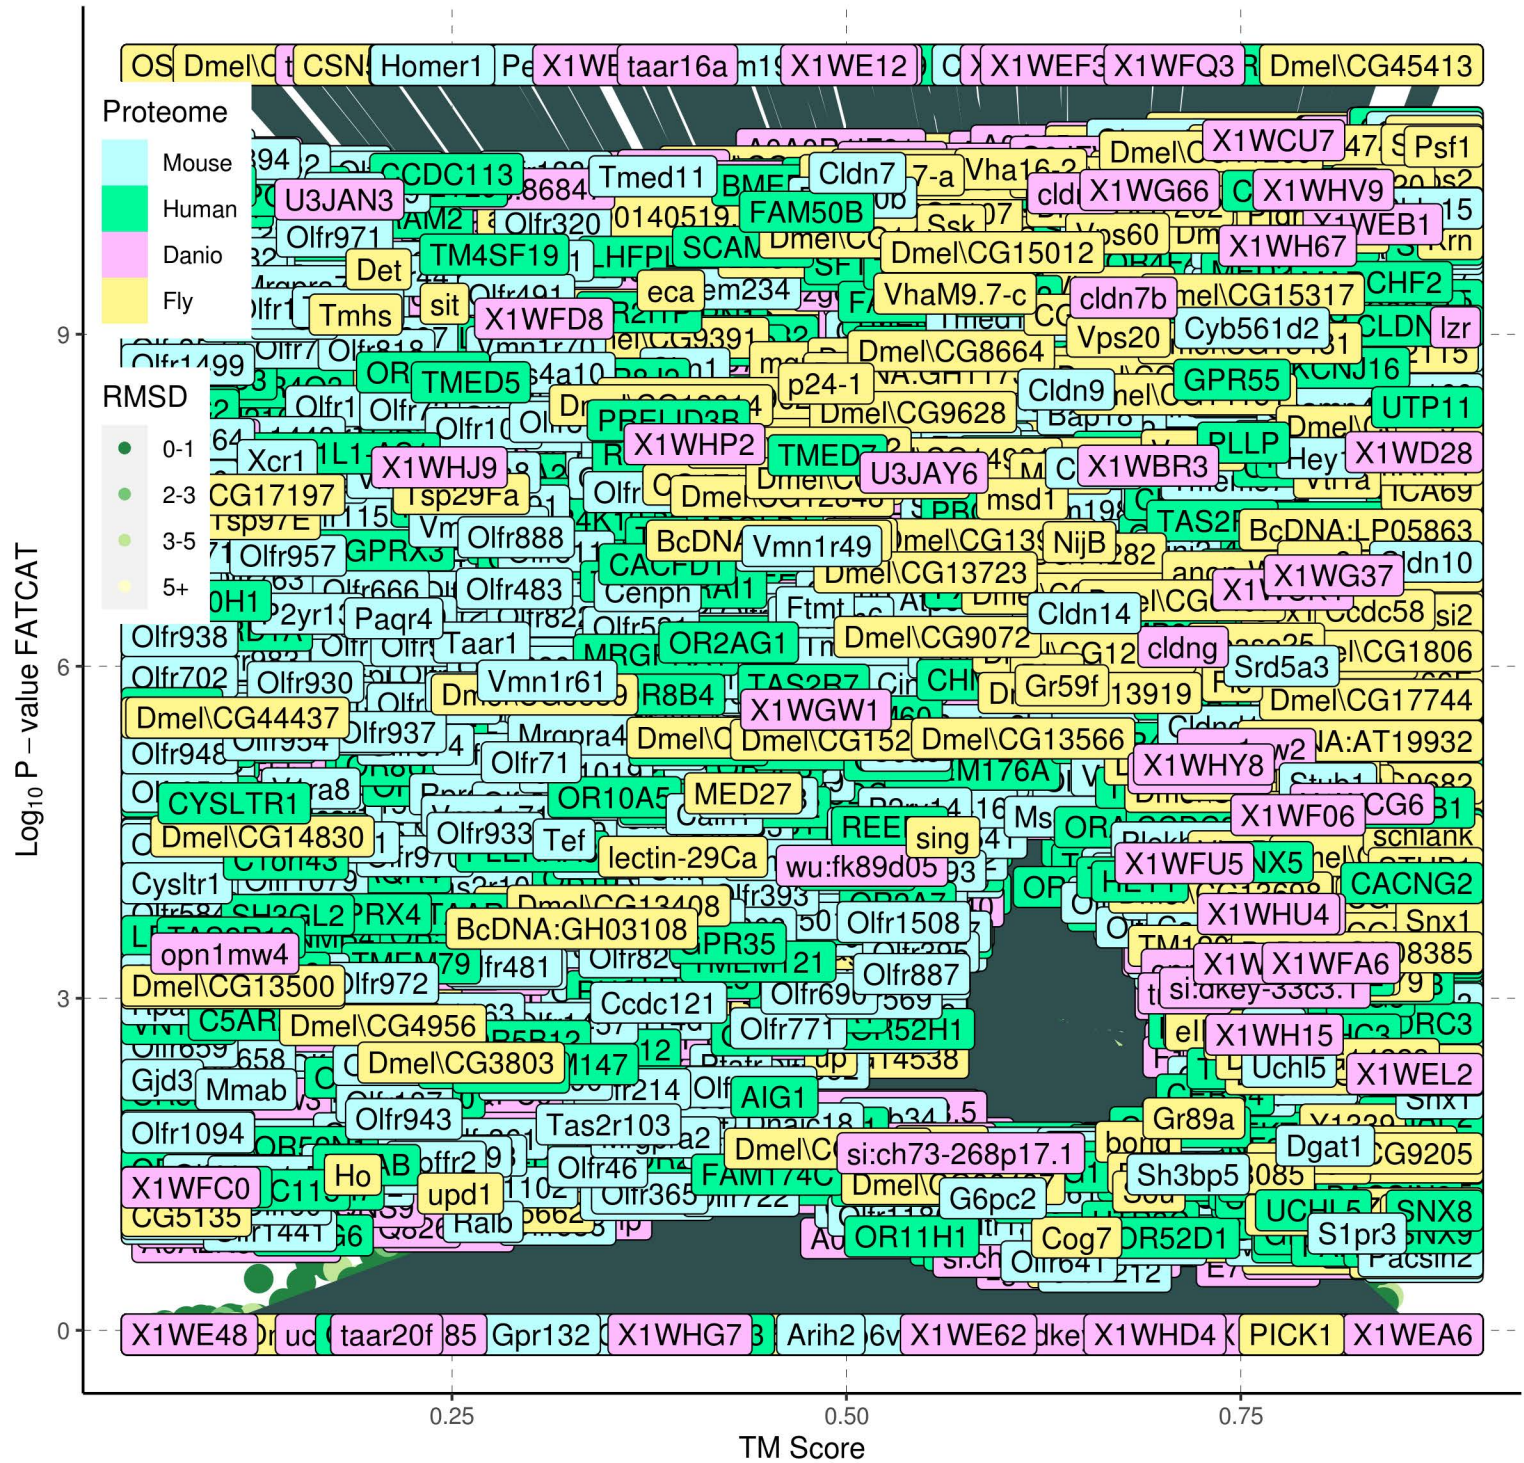

GSDM alignment

>M35027.1:c153690-152956 Vaccinia virus Copenhagen complete genome

-----  
MGNKNIKPSKENRLSILSKDKMDSFKRGSWATSSFREKSRATIQRFSSLRREHIKVDH--  
PDKFLELKRGIYEIIQKSSSIDVDKRTKLMSNIKTMM--INPFMIEGLMTSLE-----NLD--  
PDKMMSYSSVMILGEFDIINISDNE-----AAFEFINSLLKLLLLNTRQLKLEYSI-SNDLLYAHINA---  
LEYYIKNTFNVPER-----QLILRGQYLT---PIFSDLLKYAGLTIK--SNILMWNK--QFIKPVSDLYTSIRLLYCVTVX--  
-----

>AY484669.1:c159516-158782 Rabbitpox virus complete genome

-----  
MGNKNIKPSKENRLSILSKDKMDSFKRGSWATSSFREKSRATIQRFSSLRREHIKVDH--  
PDKFLELKRGIYEIIQKSSSIDVDKRTKLMSNIKTMM--INPFMIEGLMTSLE-----NLD--  
PDKMMSYSSVMILGEFDIINISDNE-----AAFEFINSLLKLLLLNTRQLKLEYSI-SNDLLYAHINA---  
LEYYIKNTFNVPER-----QLILRGQYLT---PIFSDLLKYAGLTIK--SNILMWNK--QFIKPVSDLYTSIRLLHCVTVX--  
-----

>KY349117.1:c166272-165538 Horsepox virus strain MNR complete genome

-----  
MGNKNIKPSKENRLSILSKDKMDSFKRGSWATSSFREKSRATIQRFSSLRREHIKVDH--  
PDKFLELKRGIYEIIQKSSSIDVDKRTKLMSNIKTMM--INPFMIEGLMTSLE-----NLD--  
PDKMMSYSSVMILGEFDIINISDNE-----AAFEFINSLLKLLLLNTRQLKLEYSI-SNDLLYAHINA---  
LEYYIKNTFNVPER-----QLILRGQYLT---PIFSDLLKYAGLTIK--SNILMWNK--QFIKPVSDLYTSIRLLHCVTVX--  
-----

>MG599038.1:c157906-157148 Buffalopox virus isolate Karachi 2005 complete genome

-----  
MGNKNIKPSKENRLSILSKDKMDSFKRGSWATSSFREKSRATIQRFSSLRREHIKVDH--  
PDKFLELKRGIYEIIQKSSSIDVDKRTKLMSNIKTMM--INPFMIEGLMTSLE-----NLD--  
PDKMMSYSSVMILGEFDIINISDNE-----AAFEFINSLLKLLLLNTRQLKLEYSI-SNDLLYAHINA---  
LEYYIKNTFNVPER-----QLILRGQYLT---PIFSDLLKYAGLTIK--SNILMWNK--  
QFIKPVSDLYTSMRLLHCVTESYKVIGMGX-----  
-----

>AY243312.1:c154675-153917 Vaccinia virus WR complete genome

-----  
MGNKNIKPSKENRLSILSKDKMDSFKRGSWATSSFREKSRATIQRFSSLRREHIKVDH--  
PDKFLELKRGIYEIIQKSSSIDVDKRTKLMSNIKTMM--INPFMIEGLMTSLE-----NLD--  
PDKMMSYSSVMILGEFDIINISDNE-----AAFEFINSLLKLLLLNTRQLKLEYSI-SNDLLYAHINA---  
LEYYIKNTFNVPER-----QLILRGQYLT---PIFSDLLKYAGLTIK--SNILMWNK--  
QFIKPVSDLYTSMRLLHCVTESYKVIGMGX-----  
-----

>KC813500.1:c153312-152578 Cowpox virus strain MonKre08/4 complete genome

-----  
MGNKNIKPSKENRLSILSKDKMDSFKRGSWATSSFREKSHATIQRFSSLRREHIKVDH--  
PDKFLELKRGIYEIIQKSSSIDVDKRTKLMSNIKTMM--INPFMIEGLMTSLE-----NLD--  
PDKMMSYSSVMILGEFDIINISDNE-----AAFEFINSLLKLLLLNTRQLKLEYSI-SNDLLYAHINA---  
-----

LEYIINKNTFNVPER-----QLILRGQYLT---PIFSDLLKYAGLTIK--SNILMWNK--  
KFIKPVSDLYTSMRLLHCVTX-----

>NC 055231.1:c163765-163031 Orthopoxvirus Abatino complete genome

-----  
MGNKHIKPSKENRLSILSKDKMDSFKRGSWATSSFREKSHATIQRFSSLRREHVKVDH--  
PDKFLELKREIYEIIQSSSIDVDKRTKLMSNIKTMM--INPFMIESLMTSLE-----NLD--  
PDKMMSYSSVMILGEFDIINISDNE-----AAFEFINSLLKLLLLNTRQLKLEYSI-SNDLLYAHINA---  
LEYIINKNTFNVPER-----QLILRGQYLT---PIFSDLLKYAGLTIK--SNILMWNK--  
KFIKPVSDLYTSMRLLHCVTX-----

>MN912466.1:c156293-155559 Ectromelia virus WH complete genome

-----  
MGNKNIKPSKENRLSILSKDKMDSFKRGSCATSSFREKSHATIQRFSSLRREHIKVDH--  
PDKFLVLKREIYEIIQSSSIDVDKRTKLMSNIKTMM--INPFMIEGLMTSLE-----NLD--  
PDKMMSYSSAMILGEFDIINISDNE-----ATFEFINSLLKLLLLNTRQLKLEYSI-SNDLLYANINA---  
LEYIINKNTFNVPER-----QLILRGQYLT---PIFSDLLKYAGLTIK--SNILMWNK--  
KFIKPVSDLYTSMRLLHCVTX-----

>MH607143.1:c167386-166652 Akhmeta virus isolate Vani 2010 complete genome

-----  
MGNKHIKPSKENRLSILYKDRMDSFKRGSWATSSFREKSHATIQRFSSLRREHVKVDH--  
PDKFLELKREIYVIIQKSASIDVDKRTKLMSNIKTMM--INPFMIEGLMSSLE-----NLD--  
PDKMMSYSSVMILGEFDIINISDNE-----KAFEFINSLLKLLLLNTRQLKLEYSI-SNDLLYAHINA---  
LEYIINKNTFNVPER-----QLILRGQYLT---PIFSDLLNYAGLTIK--SNILMWNK--  
KFIKPVSDLYTSMRLLHCVTX-----

>DQ437594.1:c153307-152573 Taterapox virus strain Dahomey 1968 complete genome

-----  
MGNKNIKPSKENRLSILYKDRMDSFKRGSWVTSSFREKSHATIQRFSSLRREHVKVDH--  
PDKFLELKREIYAIQKSSSIDVDKRTKLMSNIKTMM--INPFMIEGLMTSLE-----SLD--  
PDKMMSYSSVMILGEFDIINISDNE-----AAFEFINSLLKLLLLNTSQLKLEYSI-SNNLLYTHINA---  
LEYIINKNTFNVPER-----QLILRGQYLT---PFFSDLLKYAGLTIK--SNILMWNK--  
KFIKPVSDLYTSMRLLHCVTX-----

>KY358055.1:c145385-144651 Variola virus strain VD21 17th century complete genome

-----  
MGNKNIKPSKENRLSILYKDRMDSFKRGSWATSSFREKSHATIQRFSSLRREHVKVDH--  
PDKFLELKREIYAIQKSSSIDVDKRTKLMSNIKTMM--INPFMIEGLMTSLE-----SLD--  
PDKMMSYSSVMILGEFDIINISDNK-----AAFEFINSLLKLLLLNTSQLKLEYSI-SNDLLYTHINA---  
LEYIINKNTFNVPER-----QLILRCQYLT---PIFSDLLKYAGLTIK--SNILMWNK--KFIKPVSDLYTSMRLLHCVTX-  
-----

>DQ441432.1:c146026-145292 Variola virus strain Korea 1947 (Lee Masterseed) complete genome

-----  
MGNKNIKPSKENRLSILYKDRMDSFKRGSWATSSFREKSHATIQRFSSLRREHVKVDH--  
PDKFLELKREIYAIQKSSSIDVDRKTKLMSNIKTMM--INPFMIEGLMTSLE-----SLD--  
PDNKMSYSSVMILGEFDIINISDNK-----AAFEFINSVLKSLLLLNTSQLKLEYSI-SNDLLYTHINA---  
LEYIKNFTFNVPER-----QLILRCQYLT---PIFSDLLKYAGLTIK--SNILMWNK--  
KFIKPVSDLYTSMQLLHCVTX-----  
-----

>DQ441437.1:c146904-146170 Variola virus strain Sierra Leone 1969 (V68-258) complete genome

-----  
MGNKNIKPSKENRLSILYKDRMDSFKRGSWATSSFREKSHATIQRFSSLRREHVKVDH--  
PDKFLELKREIYAIQKSSSIDVDRKTKLMSNIKTMM--INPFMIEGLMTSLE-----SLD--  
PDNKMSYSSVMILGEFDIINISDNK-----AAFEFINSLLKSLLLLNTSQLKLEYSI-SNDLLYTHINA---  
LEYIKNFTFNVPER-----QLILRCQYLT---PIFSDLLKYAGLTIK--SNILMWNK--  
KFIKPVSDLYTSMQLLHCVTX-----  
-----

>MN240300.1:c166555-165827 Alaskapox virus complete genome

-----  
MGNKNGKPFTENIQFLKDKRDSFKRGWTWATSSFREKSHATIQRFSSLRRENVKVDQ--  
HDKYMELKREIYAIQKSSSIDINKRKLMSNIKMMM--INPFMIEGLMTSLE-----NLD--  
PDNKMSYSSVMILGEFDIINISDNE-----TAFEFINLLKSLLLLNNRQLKLEYSI-SNDLLYAHINA---  
LEYIKNFTFNVPER-----QLILRGQYLT---PIFSDLLKYAGITIK--SNILMWNK--KFIKPVSDLYTSMRLLHCVTX-  
-----

>KU749310.1:c167631-166873 Skunkpox virus strain WA complete genome

-----  
MGNNIKPSKEDKQLSSKGNRQSIKDRMDSFKRGSWATSSFREKSVTTIQFSSLRREHTKIEQ-  
PDSKFIELKREIYEIINKSSSIDIDKRLMLIYNIKKMM--VQPFMLEGLMNSLE-----KMD--  
PEDMISYSSVMILGEFDIVNIYDNK-----STFQFINGLLKSLHALNSKQLKLEYSI-SNDLLYNQVTA---  
LEYVIKNTFDVPER-----QLILRGQYLT---PIFNDLLKYSGLTIK--SNILMWNK--KFIKPVSDLYTAIRLLYCVTIX--  
-----

>KU749311.1:c169057-168281 Volepox virus strain CA complete genome

-----  
MGNNIKPSKENRQSLSKENRQSLKKNRQSFLENDGMDTFKRGSWATSSFREKSASTIHKFSSLRREHTKIDQP  
-DSKFIELKREIYEIINKSSSIDIDKRIMLVYNIKKMM--VNPFMIEGLMNSLE-----KMD--  
PEDVISYSSVMIFGEFDMVNIHKN-----SAFQFINSLLKSLHALNNKQLKLEYSI-SNDLLYNQVTA---  
LEYVIKNTFDVPER-----QLILRGQYLT---PIFNDLLKYSGLTIK--SNILMWNK--KFIKPIDLYTAIRLLYCVTIX--  
-----

>KU749309.1:c145369-144644 Raccoonpox virus strain 85A complete genome

-----  
MGNNIKSSKENRQSGFLKDRMDSFKRGSWATSSFREKSVPTIHKFSSLRREVRTVQP--  
DSKFIELKREIYAIINKSSSIDIDKRIILISNIKKMM--VNPFMIEGLMNSLE-----KMD--  
PEDMISYSSVMILGEFDINMND-----PSFQFIISLLKSLHALNNKQLKLEYSI-GNDLLYSQVTA---  
LEYVIKNTFDVPER-----QLILRGKYLT---PIFNDLLKYSGLTIK--SNILMWNK--KFIKPVSDLYIAIRLLYCMITIX--  
-----



>AY009089.1:c154402-154034 Camelpox virus CMS complete genome

-----MM--INPFMIEGLMTSLE-----SLD--PDNKMSYSSMMILGEFDIINISDNE-----  
VAFEFIHSLKSLLLNLSQLKLEYSI-SNDLLYTHINA---LEYIKNFTFNVPER-----QLILRGQYLT---  
PIFSDLLKYAGLTIKX-----

>MK910851.1:c154204-153836 Camelpox virus strain Negev2016 complete genome

-----MM--INPFIEGLMTSLE-----SLD--PDNKMSYSSMMILGEFDIINISDNE-----  
VAFEFIHSLKSLLLNLSQLKLEYSI-SNDLLYTHINA---LEYIKNFTFNVPER-----QLILRGQYLT---  
PIFSDLLKYAGLTIKX-----

>MF001305.1:c159640-158771 NY 014 poxvirus strain 2013 complete genome

---  
MGNKHSEPVFSESTISYTKRSMRVPCNEKPSTELKTGFNRLSLREKTVSSLQRGFNRLSLNEKTFSLSRGFNNR  
LSLNEKTFSLQRGFSLRRFNSVRGES-SNSKLMELKKEIYETIQQANDMDIDKRIKLLYNIKSMM--  
GNSFMLKGLIDSLE-----TLE--PTDGISYSSVMILGEFSILDQYTDGGK----  
STFKFVINLLKSLDSLNNHHQQKLEIYAV--NNDILYDQITM---IEYIMKNNLDMENR-----QFILKGKYTT---  
PLFIDLLKHTGINV--ISNVLIWNK--KYTKSISNLYTAMRLLYSITVX-----

>MF001304.1:c160603-159728 Murmansk poxvirus strain LEIV-11411 complete genome

MGNKHSEPVFASTISYTKRSSIRRVPCNENPSTELKTGFNRLSLREKTVSSLQRGFNRLSLNEKTFSLHRGFN  
NRLSLNEKTFSLQRGFSLRRFNSVRGES--SSKLMELKKEIHETIQQANNMDIDKRIKLLYNIKSMM--  
GNSFMLKGLIDSLE-----TLE--PTDGISYSSVMILGEFSILDQYTDGGK----  
STFKFVINLLKSLDSLNNHHQQKLEIYAV--NNDMLYDQITM---LEYIMKNNLDMENR-----QFILKGKYTT---  
PLFIDLLKHTGINV--ISNVLMWNK--KYTKSISNLYTAMRLLYSITVX-----

>HQ849551.1:c134784-134035 Yoka poxvirus strain DakArB 4268 complete genome

-----  
MGNKNSDPVFTSTSCNNTTSLKRGQSLHLHRDLKLSLNENTLFNRNFSFRRVNSMRIKPSNYSKLIELKKEIF  
ETIKKANDMDIDKRIKLLHNIKSII--TNPFLKGLIESLE-----TFE--  
SVDGIKYSSVMILGEFNILDQYTG-----STFQFVIDLLKSLYVLNNKQKIIYAI--NNDMLYEQIEM---  
IEYIMTNVLDIDNY-----HFILKGKYVT---PLFVELLKNTGINV--ISNNIIWNK--KYTKNISNLYKAIRLLHSITVX--

>KU749310.1:172437-172985 Skunkpox virus strain WA complete genome

-----  
MQNSYIGQIYTRCHAILLIPDEYKHKFIKSLTHLI--GYNGRTYNRCT-----  
RDAITELTDIANEIDNT-----DVKLITTFIISYKITRFQSFLVELAM-YHKVLDKIQHI---  
MEYIIDNHSRIDNNGFTPYSDNDPDFNQVIA--  
CIIYNLLRSSGMEINYSKYKAWWNPRHDYVDTFGLLYVIFTILSIIDDNX-----

>KU749309.1:150174-150722 Raccoonpox virus strain 85A complete genome

-----  
MRDSYICQIYTRCHSILSMPDDYKYKFIKSLNHLI--RYNGRTYNRCT-----

RDITELSDIANSIDDT-----DIKIITTFIISIIYKTRFQSFLVELAM-HHKVLDKVQHI---  
MEYIIDNHSHSNTNGFTPYSIDDPDFNQVVA--  
CIIYNLLRSSGMDINYSKCKAWWNPRHDYVDTFGLLYVIFTILSIIGDKX-----

>KU749311.1:173861-174445 Volepox virus strain CA complete genome

MLNDYIGQIYIRCRAILSIPDDYKHKFIKSLTHLI--RYNGRTYNRCT-----  
RDITELSDIANNIGNN-----DVKIITTFIISIIYKTRFQSFLVELAM-YHKVLDKIQHI---  
MEYIIEHSHNDTNGFTPYSTDDTNFNQVIA--  
CIIYNLLKSSGMEINYSECKAWWNPRHDYVDTFGLLYIIVTILLIDGDQYNFYNKLEKNKX-----

>MF001304.1:c165763-165224 Murmansk poxvirus strain LEIV-11411 complete genome

-----M--  
LSVPSQYKDLLQEYYDIITSVPDEYRDIFVEYLIYLI--EYDGRISNKRT-----  
RDIKKELINIVGKVSDKT-----RLMNFISFITESICRLTRFQSFLLELAS-YHNVLDEVQEI---  
MGDIENHCRMEIIGFTTYDINSIVL-----SIIYNMLKTSGMVRVDYDTSKAWWNP--  
EYRDMFGSLYMIVTTLTILKNIX-----

>MF001305.1:c164808-164269 NY 014 poxvirus strain 2013 complete genome

-----  
MLSVPSKYKDLLQEYYDIITSVPDEYRDIFVQYLIYLI--EYDGRISN-----  
KRTRDIKKELINIVGKVSDKT-----RLMNFISFITESICRLTRFQSFLLELAS-YHDVLDEVQEI---  
MGDIKNHCRMEIIGFTAYDINSIVL-----SIIYNMLKTSGMVRVDYDTSKVWWNP--  
EYSDFMFGSLYMIVTTLTILKNIX-----

>NP 051846.1 m132L Myxoma virus

-----MGNLLYCCFTV--  
EKTVPISQRYVNGQVNLNDFLARHRKRSILLYLLKVI--RDDKLLNEVC-----  
RVKKKYSVYLYGCKNPNA-----EVVNFINYILVYLNALSCTQKRLLYIII-AENMISSFIGY---  
INTVFTSNAVKFKDSE-----RCIEELFIETGLYI--SPQGSYKHTEVMEELIYLYILARLFKQLL-----

>NP 052021.1 gp132L Rabbit fibroma virus

-----MGNLLYCCFV--  
DVTTPSIQRYVNEQVNLDFLSRRKKKSILLYLLKVI--RNDKLLTEVYC-----  
SKKYSELYGCKNPNT-----EVVNFINYIYLINALSYTQKRLLYIII-AENMITSFIEY---  
INAVFTSSSTVKFKDSE-----RCIEELFIETGLYISSSQGYNKQHT--EVMEELIYLYILAKLFKQLL-----

>YP 009408097.1 Immunoprevalent protein Eptesipox virus

-----MGNSTSVSKSCNNAVTHVSANSIRQHIL--  
FNNFETLHKDIQSKIDLVNTFTPQTKNLIFRNLLIVI--TNSYHLQNLDALE-----  
QLEPMYVTDAYSEAILNEIGLCDKGIPNL-----SSIHFMIVLVSGLTKLTKQSKILMEIVTDAKIFCHHVNV---  
LEYIHKKNVEKLETVTSTLLEKYTKL-----PLEVTLFKESGLKIQ--GNTYIWDV--EHKKSICNLYTVIKIMSYIM-----

>ref|NP 835465.2| chromosome 17 organism Homo sapiens gcode 1 chromosome 17 map 17q21.1 gasdermin-A Homo sapiens

-----GDV--  
HEGFRTLKEEVQRETQQVEKLSRVGQSSLLSSLSKLL--GKKKELQDLELALEG-----ALD--  
KGHEVTLEALPKDVLLSK-----EAVGAILYFVGALTELSEAQQKLLVKSM-EKKILPVQLKL---  
VESTMEQNFLLDKEGVFPLQPELLSSLGDEEL-TLTEALVGLSGLEVQRSGPQYMWDP--  
DTLPRLCALYAGLSLLQQLTKAS-----  
-----

>ref|XP 015154998.2| location chromosome chromosome 27 completeness complete organism Gallus gallus isolate bGalGal1 gcode 1 chromosome 27 sex female tissue type blood country USA: Fayetteville lat ls

-----DGFA--  
HTEVEALEEEVKEKCGILCQLAGELNAIVLKTIKAVM--RDRNLLLEELSGKMEAVLD-DPDNCE-----  
LTTQSPDLEVLLSTLKGSPRCDLL-----SLTEAISYTLDAFSELTEDQLLLLLLESL-EVEIVPQQLKL---  
VRSILEQSAELGAA-----AGLLSSFSEQQQQQLTTAVLELSGVELQGSAAVCTE---  
ESFP SLSALYAALHALHCLV GAGGRSARAD-----  
-----

>ref|XP 024836266.1| location chromosome chromosome 19 completeness complete organism Bos taurus isolate L1 Dominette 01449 registration number 42190680 breed Hereford gcode 1 chromosome 19 sex fem...

-----GAV--  
HEDFRTLKEEVQRETQEVEKLSPEGKSSLLSSLSKLL--GKKKELQDLELLEE-----ALG--  
KGHEETLEALPKNVLLSK-----GAMDAILYFLGALAESEAQQKLLVKSM-EKKILPVQLKL---  
VESTMEQNFLQDKEGVFPLRPELLSSLGEEEL-TLTEALVGLSGLEVQRSGPQYTWDP--  
DTLPRLCALYAGLSLLRLLTKAS-----  
-----

>ref|XP 014975037.1| location chromosome chromosome 16 completeness complete organism Macaca mulatta isolate AG07107 bio material Coriell:AG07107 gcode 1 chromosome 16 sex female tissue type fibroblaa

-----GDV--  
HEGFRTLKEEVQRETQQVERLSQAGQSSLLSSLSKLL--GKKKELQDLELALEG-----ALD--  
KGHEVTLEALPKDVLLSK-----EAVGAILYFVGALTELSEVQQKLLVKSM-EKKILPVQLKL---  
VESTMEQNFLQDKEGVFPLHPPELLSSLGEEEL-TLTEALVGLSGLEVQRSGPQYMWDP--  
DTLPRLCALYAGLSLLQQLTKAS-----  
-----

>ref|XP 001171222.1| location chromosome chromosome 17 completeness complete organism Pan troglodytes isolate Yerkes chimp pedigree \*C0471 (Clint) gcode 1 chromosome 17 sex male tissue type blood devs

-----GDV--  
HEGFRTLKEEVQRETQQVEKLSRVGQSSLLSSLSKLL--GKKKELQDLELALEG-----ALD--  
KGHEVTLEALPKDVLLSK-----EAMGAILYFVGALTELSEAQQKLLVKSM-EKKILPVQLKL---  
VESTMEQNFLLDKEGVFPLQPELLSSLGDEEL-TLTEALVGLSGLEVQRSGPQYMWDP--  
DTLPRLCALYAGLSLLQQLTKAS-----  
-----

>ref|XP 024429158.1| chromosome Unknown completeness complete organism *Desmodus rotundus* isolate DRU21DN04 gcode 1 chromosome Unknown sex male tissue type muscle/skin sample dev stage adult country Us

-----GEV--  
HQDFRMLKEEIQRETQEVEKLSRMGQSSLLTSLSKLL--GKKKELQDLELTLEG-----ALD--  
KGHEVALEALPKDVLVLSK-----EVLGAILYFLGALTEELSEAQQKLLVKSM-EKKILPVQLKL---  
VESIMEQNFLLDKEGVFPLQPNDLSSCLGEEEL-TFTEALVGLSGLEVQRSQYMWDP--  
DTLPDLCALYAGLSFLQLLTKAS-----  
-----

>ref|XP 016020091.2| chromosome Unknown completeness complete organism *Rousettus aegyptiacus* isolate mRouAeg1 gcode 1 chromosome Unknown sex male tissue type muscle dev stage adult country USA: Berkes

-----GEV--  
HEDFRTLKEEIQRETQEVEKLSHLGQSSLLTSLSKLL--GNRKELQDLELTLEG-----ALG--  
KGHEVTLEALPKDVLVLSK-----EALGAILYFLGALTESEVQQKLLVKSM-EKKILPVQLKL---  
VESTMEQNFLQDKEGVFPLQPDLLSSLGEEEL-TLTEALVGLSGLEVQRSQYTWDP--  
DTLPHLCALYAGLSFLQLLTKAS-----  
-----

>ref|XP 006924750.1| chromosome Unknown completeness complete organism *Pteropus alecto* gcode 1 chromosome Unknown sex male tissue type kidney country Australia: Anglican Church Grammar School East Bro

-----GEV--  
HEDFRTLKEEIQRETQEVEKLSHVGRSSLLTSLSKLL--GNRKELQDLELTLEG-----ALG--  
KGHEVTLEALPKDVLVLSK-----EALGAILYFLGALTESEVQQKLLVKSM-EKKILPVQLKL---  
VESTMEQNFLQDKESVFPLQPDLLSSLGEEEL-TLTEALVGLSGLEVQRSQYTWDP--  
DTLPCLCALYAGLSLLQLLTKAS-----  
-----

>ref|XP 035935879.1| chromosome Unknown completeness complete organism *Halichoerus grypus* isolate 241Hg ecotype Northwest Atlantic gcode 1 chromosome Unknown sex male tissue type blood dev stage molts

-----KEE--  
HGDFKTLKEEVQREIQEVKLSRVGQSSLLTSLSKLL--GKKKELQDLELMLEG-----ALD--  
KGHEVTPEALPKDVLVLSK-----EAMGGILYFLGALIELSEAQQKLLIKSV-EKKILPMQLKL---  
VESTMEQSFLQDKGVFPLQPDLLSSLGEEEL-TLTEALVGLSGLEVQRSQYTWDP--  
DTLPRLCALYAGLSLLQLLTKAS-----  
-----

>ref|XP 004633937.1| chromosome Unknown completeness complete organism *Octodon degus* isolate 3935 gcode 1 chromosome Unknown sex female gasdermin-A *Octodon degus*

-----GEV--  
HEDFKTLKEEVRRETQEVDKLSRAGQGSLLSSLSNLL--GKKKELQDLELTLEG-----ALD--  
KGHEVTLEALPKDVLVLSK-----ESMGAILYFLGALTVLSEAQQKLLVKSV-EKKLLPVQLKL---  
VESTLEQNFLQDKEGVFPLRPDLLSSLGEEEL-TLTEALVGLSGLEVQRSQYTWDP--  
DTLPRLCALYASLSLLQLLARSP-----  
-----

>ref|XP 029428328.1| location chromosome chromosome 12 completeness complete organism Rhinatrema bivittatum gcode 1 chromosome 12 gasdermin-A Rhinatrema bivittatum

-----DYLRIENF----  
QEGFPAVMAQIEKECVFTLLSPEVAEQFLAAFLLLI--KDPKTSADVSRLEQSLY-C-SARESKA---HPE--  
PSIARLLGYLGLSSRPVVI-----PLVRAVLFFLDAVSELEDEDGTSLLVESV-ERQDTGQQLKR---  
VQKVLEEEELFSVRQGS�-----AGDEAAGGVSPPEGWSP--AVQSCAMALYAALYALHVLSSC--  
-----

>XP 032891479.1 gasdermin-A Amblyraja radiata

-----SLFC--  
QDTANVNGDEVFEICCELQCLDKGLKQRLGLVCQII--EDSELLSILSDVLCEA-C-A-GTDYTLSELEKLD--  
KKRRECGENLLAIWSEDQLKNAVED-----NLLKAVSILFAALEDLPPTTLPVLIQSL-KMQILPQQLTL---  
VTGILKDLDSQVDQALKVETE--SFTEDAF-GITAEMLTDVGLHLERDSVQKTREP--S----  
LHELSVALYCLNALSSN-----

>sp|Q5Y4Y6|GSDA3 MOUSE Gasdermin-A3 OS Mus musculus OX 10090 GN Gsdma3 PE 1 SV 1

-----GEM--  
HEDFKTLKEEVQRETQEVEKLSVGRSSLLTSLSHLL--GKKKELQDLEQKLEG-----ALD--  
KGQKVTLEALPKDVLLSK-----DAMDAILYFLGALTEELTEEQKILVKSL-EKKILPVQLKL---  
VESTLEQNFLQDKEGVFPLQPDLLSSLGEEEL-TLTEALVGLSGLEVQRSGPQYAWDP--  
DTRHNLCALYAGLSLLHLLSRKSNALTYCALS-----

>sp|Q9EST1|GSDMA MOUSE Gasdermin-A OS Mus musculus OX 10090 GN Gsdma PE 2 SV 1

-----GEM--  
HEDFKTLKEEVQRETQEVEKLSVGRSSLLTSLSHLL--GKKKELQDLEQTLEG-----ALD--  
KGHEVTLEALPKDVLLSK-----DAMDAILYFLGALTVLSEAQQKLLVKSL-EKKILPVQLKL---  
VESTMEKNFLQDKEGVFPLQPDLLSSLGEEEL-ILTEALVGLSGLEVQRSGPQYTWDP--  
DTLPHLCALYAGLSLLQLLSKNS-----

>sp|Q32M21|GSDA2 MOUSE Gasdermin-A2 OS Mus musculus OX 10090 GN Gsdma2 PE 2 SV 1

-----GEM--  
HEDFKTLKKEVQQETQEVEKLSVGRSSLLTSLSHLL--GKKKELQDLEQMLEG-----ALD--  
KGHEVTLEALPKDVLLLK-----DAMDAILYFLGALTEELSEEKILVKSL-ENKVLPVQLKL---  
VESILEQNFLQDKEDVFLRPDLLSSLGEEEDQ-ILTEALVGLSGLEVQRSGPQYTWNP--  
DTCHNLCALYAGLSLLHLLSRDS-----

>ref|NP 001159430.1| chromosome 17 organism Homo sapiens gcode 1 chromosome 17 map 17q21.1 gasdermin-B isoform 3 Homo sapiens

-----  
----DVLNSLAKCL--GKEDIRQDLEQRVSEVLI-S-G-----ELHMEDPDKPLLSSLFNAAGVLVE-----  
ARAKAILDFLDALLESEEQQ-FVAEAL-EKGTLPPLKQD---VKSVMENQWD-----  
ELASSPPDMDYDP---EARILCALYVVVSILLELAEGPTSVSS-----

>ref|NP 001231146.1| chromosome 19 organism Bos taurus gcode 1 chromosome 19 map 19 gasdermin-B Bos taurus

-----  
----EALNCFTKCL--SSEELQDLEQRVSEVQC-S-G-----ELQMNSPANSLISSLFNAAGALIE-----  
ARAETIWDVLDALMELSEYRQ-FVAEVL-DKGELRPVKDK---VESILEEN-----  
RCEGPLDVSCD-----PEARTLCALYVVVSILLQLSEKPTS SVSS-----  
-----

>ref|XP 009430521.1| location chromosome chromosome 17 completeness complete organism  
Pan troglodytes isolate Yerkes chimp pedigree \*C0471 (Clint) gcode 1 chromosome 17 sex male  
tissue type blood devs

-----  
----DVLNSLAKCL--GKEEIRQDLEQRVSEVLISR-----ELHMEDPDKPLLSSLFNAAGVLVE-----  
VRAKAILDFLDALLESEEQQ-FVAEAL-EKGTLP LLK DQ---VKSVM EQNWD-----  
ELASSPPDMDCDP---EARILCALYVVVSVLLELAEGPTS SVSS-----  
-----

>ref|XP 023358160.1| location chromosome chromosome 4 completeness complete organism  
Sarcophilus harrisii gcode 1 chromosome 4 cell line 91H gasdermin-B Sarcophilus harrisii

-----  
----AVDLLLTRL--QDEALGEMEGKVAMALF-T-E-----ELS--DPENPLLSVLF DASGSSMQ-----  
NQAEGILDFLEALTELKEEQKILPKVV-EKGLLSETMKL---VEDLLRQSETFSLKAD-----  
SITHTLVGICDPEGKLEQP-VTWDS--ETCHSLCALYTVLSVLMMLLAQGSVSP-----  
-----

>ref|XP 024897515.1| chromosome Unknown completeness complete organism Pteropus  
alecto gcode 1 chromosome Unknown sex male tissue type kidney country Australia: Anglican  
Church Grammar School East Bro

-----  
----DALSLCTKCL--TKDEQLQDLEQRMSEVLISG-----ELQMDSPAGPLISSLFNAAGILVE-----  
TRTEAIMDFLDVMEFFE-EKELVGEAL-EKGTLP LLK E---VESVLDQNGGEQPE-----  
-----CVGCDP---EAQILHALYVAVSILLQLSEKPASASS-----  
-----

>ref|XP 036078993.1| chromosome Unknown completeness complete organism Rousettus  
aegyptiacus isolate mRouAeg1 gcode 1 chromosome Unknown sex male tissue type muscle dev  
stage adult country USA: Berkes

-----  
----DALSLCKCL--TKDEQLQDLEQRVSEILISG-----ELQMDSPAGLLINSLFNASGILVE-----  
TRTEAIMDFLDALMELSE-EKELVAEAL-EKGTLP LLK E-----QNCGEQPE-----  
YVGWDP---EAQVLR TIYA AVSILLLLSEKPASVSC-----  
-----

>ref|XP 024429114.1| chromosome Unknown completeness complete organism Desmodus  
rotundus isolate DRU21DN04 gcode 1 chromosome Unknown sex male tissue type muscle/skin  
sample dev stage adult country Us

-----  
----NVLSCLTKCL--TSDGELQALEERVSEVLV-S-E-----ELQVEGPADPLISSLFNAAGILVE-----  
ACIEAILDFLDALKELSEEKE-LVAETL-EKGTLP LLK DQSGGLKSVLEQE WGEQPRG-----  
-----VGRDP---EAQTVCTLYLVVSILLQLSEKPAPASSC-----  
-----

>ref|XP 014975035.1| location chromosome chromosome 16 completeness complete organism Macaca mulatta isolate AG07107 bio material Coriell:AG07107 gcode 1 chromosome 16 sex female tissue type fibroblaa

-----  
----DVLNFLTCL--GREELWQDLEQKISEVLI-F-G-----ELQMEDPVNPLLSSLFNAAGILVG-----  
ARAEAILDFLDALLESEEQH-LVAEAL-EKGTLPPLKQDQ--VKPIMEQNWD-----  
ELASSPHDMDCDP--EARIPCALYVVVSVLLELAEGTTSVSS-----  
-----

>ref|XP 035935913.1| chromosome Unknown completeness complete organism Halichoerus grypus isolate 241Hg ecotype Northwest Atlantic gcode 1 chromosome Unknown sex male tissue type blood dev stage molts

-----  
DVLSCLRGQLPLSAKVFEVLISGSRHLEMEGLVGLL-----ISSLFNAAGFLVK-  
-----AHTESILDVLDAL--ITSEEQHLVAEAL-EKGTLPPLKQDQ--VRSVLEQNWSEQPH-----  
-----DVGWDP--DAXLLCALYVALSLLLQLGKPTSVPs-----  
-----

>ref|NP 113603.1| chromosome 8 organism Homo sapiens gcode 1 chromosome 8 map 8q24.21 gasdermin-C Homo sapiens

-----  
LLPSFHTISPTLFNASSNDMCLKPELFLTQQFLSGHLPKYEQVHILPVG-RIEPPF----  
WQNFKHLQEEVFQKIKTLAQLSKDVQDVMFYSLAML--RDRGALQDLMNMLELDSS-G-----HLD--  
GPGGAILKKLQQDSNHAWF-----NPKDPILYLLEAIMVLSDFQHDLLACSM-EKRILLQQQEL---  
VRSILEPNFRYPWSIPFTLKPPELLAPLQSEGL-AITYGLLEECGLRMELDNPRSTWDV--  
EAKMPLSALYGTLSLLQLLAEA-----  
-----

>ref|XP 028708741.1| location chromosome chromosome 8 completeness complete organism Macaca mulatta isolate AG07107 bio material Coriell:AG07107 gcode 1 chromosome 8 sex female tissue type fibroblasta

-----  
WLPSFHTISPTLFNASPKDMCLKPELFLKPKFLRGHLPKYEQVCILPVG-RIEPPF----  
WQNFKHLQEEVFQKIKTLAQLSKDVQDVVYFYSILAML--GDRGALQDLMMDMLELDSS-G-----HLD--  
GPGGAILKKLQQYSNRAWF-----NPKDPILYLLEAIMVLNDIQHDLLACSV-EMRILLQQQEL---  
VRSILEPNFRYPWSIPFTLKPPELLAPLQSEGL-AITYGLLEECGLRMELDNPRSTWDL--  
EAKIPLSALYGTLSLLQLLAEA-----  
-----

>ref|NP 001039469.1| chromosome 14 organism Bos taurus breed L1 Hereford gcode 1 chromosome 14 map 14 gasdermin-C Bos taurus

-----  
ILSISDDNKRKAFFVGKVRQSQSAMGTRRPIPIGRIQEPI--  
SRDFKSLQNEVSREIEAVALPRDIRDALFHTILAKL--KDQALQDLTMDMLDGNLW-----  
DHTGSFLSEMREDSRNVL-----ESRPCVIYLLEALLVLSDIQHELLAWSM-EKRILPQQREL---  
VESILEPNFRYPWNIPFTLDPKLLASLQDEGL-AVTFGLLQECGLRVAPDNPKGTWDL--  
EAKKPLSALYGSLSVLQLLAEA-----  
-----

>ref|XP 031803207.1| location chromosome chromosome 1 completeness complete organism Sarcophilus harrisii gcode 1 chromosome 1 cell line 91H gasdermin-C Sarcophilus harrisii

-----  
HTEIGLGS MRGMEEKLEWKDY PKLSL FLETIEETQQGFGWKQQDRNNCQR--  
VRDFQRLL EEVTFQKKDLVRMPGKQRTTLLCALHDLL--GNRTALQDLEDKLLHVLD-SGIWG-----KME--  
GPGNTILSNLQDSSDSPVN-----GYITGFLYLLEALAALSDNQHDLLAQSL-EKKILSQQLKL---  
VKSILETNFNQFHS-TFILPPEILSLIDEEL--NLSLELVEDCGLQLQRTEQMLILDV--  
EGKNPLCALYGALSCLLSLED-----  
-----

>ref|XP 036088919.1| chromosome Unknown completeness complete organism Rousettus aegyptiacus isolate mRouAeg1 gcode 1 chromosome Unknown sex male tissue type muscle dev stage adult country USA: Berkes

-----FRLQLQSFTGGREIQPKSGECEIQILSGRAQRSC-  
-WLD FGR LQEEVS-WYV KKAQLLEDMGAVVFSSILAML--GDWEALEGLEDKLEQKPL-G-----HLD--  
GPGGVILNALRESSYQWF-----NSED S ILYLLEAINGLS DLQH DLLAWSM-EKKVLLQQRDL---  
VRSILEPNFKYPWNIPFTMKPELLAPLRGEAL-AITYGLLEECGLTMEPN SPRSTWDL--  
EAKKPLSALYAALS VLQQLAEA-----  
-----

>ref|XP 024427836.1| chromosome Unknown completeness complete organism Desmodus rotundus isolate DRU21DN04 gcode 1 chromosome Unknown sex male tissue type muscle/skin sample dev stage adult country Us

-----  
DFKRLHEEVSKRVIAAAELSKDIKGVVFSNILAML--GDRGALQDLVHMLEQEPLKG-----HLN--  
GPGGTILNELQKDS S FAWN-----GSQYLILYLLEAMMVLSDVQLCLLAPSM-EKKILSQQRDL---  
VRSILEPNFKYPWSIPFTLPELLAPLQGEGL-AITYGLLEECGLKME LHS PRSTWDL--  
EAKKPLSALYGTLSVLQQLAEA-----  
-----

>ref|XP 019678683.1| location chromosome chromosome F2 completeness complete organism Felis catus isolate Cinnamon breed Abyssinian gcode 1 chromosome F2 sex female gasdermin-C Felis catus

-----  
AVNNGPLYTMSVSDVRKPLDLVLHSPGRIQRVL--WQDFKQLHEEIFQEMEALAQSKDTQDSIFHTILNML--  
GNREALQDLTDTLDGSPL-D-----LLD--DFGGTILNEMQPDTRDLWI-----  
QARFHIIYLLEVIMVLSDTQHDLAQSM-EKRILLQQQKL---VRSILEPNFKYCWDPFTLPELLAPLQGEDL-  
AITYGLLEECGLKME LNS PRSTWDL--ETKQPLSALYGTLSLLQQLTGSPERPGPTPVYAESVPDELGGV-----  
-----

>ref|XP 001153860.1| location chromosome chromosome 8 completeness complete organism Pan troglodytes isolate Yerkes chimp pedigree \*C0471 (Clint) gcode 1 chromosome 8 sex male tissue type blood dev ss

-----  
LLPSFHTISPTLFNASSNDMKLPFLTLTQQFLSGHLPKYEQVHILPVG-RIEERF----  
WQNFKHLQEEVFQKIKTLAQSKDVQNVVFSILAML--RDRGALQDLMNMLELDSS-G-----HLD--  
GPGGAILKKLQQDSNHAWF-----NPKDPILYLLEAIMVLSDFQHDL LACSV-EKRILLQQQEL---  
VRSILEPNFRYPWSIPFTLPELLAPLQSEGL-AITYGLLEECGLRMELDNPRSTWDLV--  
-----



EAKMPLSALYGTLSLLQQLAEA-----  
-----

>ref|XP 021073018.1| location chromosome chromosome 17 completeness complete organism  
Mus pahari gcode 1 chromosome 17 sex female tissue type tail gasdermin-C Mus pahari

-----RPMYLSGHFEILRHHEEIIIRIGSRIEYISPIGTIEEPT--  
HLDFQCLQNEVSQKTMLLAELSKDVQEVVFSFLHMLCEGDSEVLYDLMKMLELNQL-E-----HMD--  
GPGGKILEELQKDRSPSWI-----DLKDLILNLLQALMVLSNTQLSLLAQSV-EMRLLLQQQEL---  
VKSILQPNYKYPWHIPFTLQPQLLAPLQGEGL-AITYELLEECGLKMELNNPRSTWHL--  
EVKMPLSALYASLSLLQQLSEA-----  
-----

>ref|NP 081236.1| chromosome 15 organism Mus musculus strain C57BL/6 gcode 1  
chromosome 15 map 15 gasdermin-D Mus musculus

-----DG-IDEELIE--  
AADFQGLYAEVKACSSSELESLEMELRQQILVNIGKIL--QDQPSMEALEASLGQGLC-SGGQVE-----PLD--  
GPAGCILECLVLD SGELVP-----ELAIPVYLLGALAVLSETQQQLLAKAL-ETTVLSKQLEL---  
VKHVLEQSTPWQEQSSVSLPTVLLGDCWDEK--NPTWVLLLEECGLRLQVESPVHWEV--  
TSLIPTSALYASLFLSLGQKPC-----  
-----

>ref|NP 079012.3| chromosome 8 organism Homo sapiens gcode 1 chromosome 8 map 8q24.3  
gasdermin-D Homo sapiens

-----DGVPAEGAF----  
TEDFQGLRAEVETISKELELLDRELCQLLLEGLGVL--RDQLALRALEEALQGS-L-GPVE-----PLD--  
GPAGAVLECLVLSGMLVP-----ELAIPVYLLGALAVLSETQHKLLAEAL-ESQTLLGPLEL---  
VGSLLQESAPWQERSTMSLPPGLLGNSWGEG--APAWVLLDECGLGELGEDTPHVCWEP--  
QAQGRMCALYASLALLSGLSQEPH-----  
-----

>ref|NP 001039625.1| chromosome 14 organism Bos taurus breed Hereford gcode 1  
chromosome 14 map 14 gasdermin-D Bos taurus

-----DG-STEHWLAT--  
TDDYQGLRAEVKAWAMGLEGLSKGLCGQLLGGGLGQVL--RDEPALQALEDSEGLG-L-GPVE-----PRD--  
GPVGAILESLVPSGQLET-----ELAGPVYLLGALAVLSEAQHVLLAEVL-EMGALSGETFWL---  
VESLVEQSSPWQEHRAVSLPPERLGDSWGSE--APGWALLEACGLEPQVGTTPQVCWEP--  
GARGCACALYACLALLRLSQLC-----  
-----

>ref|XP 015001615.2| location chromosome chromosome 8 completeness complete organism  
Macaca mulatta isolate AG07107 bio material Coriell:AG07107 gcode 1 chromosome 8 sex  
female tissue type fibroblasta

-----DGVPAEGTF----  
TEDFQGLREEVEAISKELELLDRELCQLLLEGLGVL--RDQLALRALEEALQGLS-L-GPVE-----SLD--  
GPAGAVLECLVLESRMLVP-----ELAVPVYLLGALAVLSETQHKLLAEAL-ESQTLLGPLEL---  
VGSLLQESAPWQERSTVSLPPGLLGSSWGEG--APAWVLLLEECGLGELGEDTPHVCWEP--  
QAQGRMCALYASLALLSGLSQEPH-----  
-----

>ref|XP 006913014.1| chromosome Unknown completeness complete organism Pteropus alecto gcode 1 chromosome Unknown sex male tissue type kidney country Australia: Anglican Church Grammar School East Bro

-----DG-PTENCLVP--  
TEDFQGLQVEVKAWASALENGSATLCGQLLGGGLGQVL--RDEPALQALEESLEQGLC-S-GRAE-----PLH--  
GPAGAVLECLVLHCRTRLVE-----ELARPVFYLLLEALAALSETQHMLLAEVL-ETGALPESVEL---  
VETLLEQSTPWQEREAISLSPRLLGSNWGSE--APAWVLLLEECGLKLQVGAPQVCWEP--  
EAQGPTCALYACLALLLKSQLR-----  
-----

>ref|XP 036089037.1| chromosome Unknown completeness complete organism Rousettus aegyptiacus isolate mRouAeg1 gcode 1 chromosome Unknown sex male tissue type muscle dev stage adult country USA: Berkes

-----DG-PAEHWLVP--  
TEDFQGLQMEVRAWARALEEDASATLCGQLLGGALGQVL--WDEPALQALEESLEQGLC-S-GRAE-----PLH--  
GPAGAVLECLVLRGTLVE-----ELAGPVFYLLGALAALSETQHVLAKAL-ETGALPEWVKL---  
VETLLEQSTPWQEREAISLPSELLESSWGSE--APAWVLLLEECGLKLQVGAPQVCWEP--  
EAQGPTCALYACLALLRLSCLR-----  
-----

>ref|XP 024428237.1| chromosome Unknown completeness complete organism Desmodus rotundus isolate DRU21DN04 gcode 1 chromosome Unknown sex male tissue type muscle/skin sample dev stage adult country Us

-----DG-LDEDQVVP--  
TEDFQGLQAEVQVWAGPLESLSKTLCEQLLRGLAQVL--RDELALQTLEGSLEQGLC-C-GRAE-----PLQ--  
GPAGHVLECLVLPCTRLVN-----ELAGPVTYLLGALAALSEAQRMMLAEVL-EASALPEPFKL---  
VEKLEQSSPWQECRALSPPGLLGGSSWGPE--VPAWILLEACGLELQVDAPQVSWKP--  
EAQGCTCALYACLALLSKLSQLC-----  
-----

>ref|XP 009454389.2| location chromosome chromosome 8 completeness complete organism Pan troglodytes isolate Yerkes chimp pedigree \*C0471 (Clint) gcode 1 chromosome 8 sex male tissue type blood dev ss

-----DGVPAEGAF----  
TEDFQGLRVEVETISKELERLDRELCQLLLKGLGVL--RDQLALRALEEALQGGQS-L-GPVE-----PLD--  
GPAGAVLECLVFSSGVLVL-----ELAIPIVYLLGALTMLSETQHKLLEAL-ESQTLLGPLEL---  
VGSLLQESAPWQERSTMSLPPGLLGSSWGEG--APAWVLLDECGLELGEDTPHVCWEP--  
QAQGRMCALYASLALLSGLSQEPH-----  
-----

>ref|XP 023104116.1| location chromosome chromosome F2 completeness complete organism Felis catus isolate Cinnamon breed Abyssinian gcode 1 chromosome F2 sex female gasdermin-D Felis catus

-----DG-DIEDQMPV--  
TEDFQGLKVEVSVHADGLKGLSGELCGQILAGLMKVL--REEPALESLEEELEQGLC-C-GWVA-----SPD--  
APGGAILECLVQSSGKVEE-----ELARPILYLQALTELNETQRVLLAEAL-ETGDLSGQSRL---  
VQSVLEQSSPWKEHRAVSLPQELLGSSWDSE--APAWVLLLEECGLELRVDVPQVHWQP--

DAQGRTSALYACLVLLPHLSQDQLNETQRVLLAELETGDLGQSRLVQSVLEQSSPWKEHRAVSLPQELLGS  
SWDSEAPAWVLLLEECGLELRVDVPQVHWQPDAQGRTSALYACLVLLPHLSQDRA

>ref|NP 001120925.1| chromosome 7 organism Homo sapiens gcode 1 chromosome 7 map  
7p15.3 gasdermin-E isoform a Homo sapiens

-----DAAHGISSQDGP--  
LSVLKQATLLERNFHPFAELPEPQQTALSDIFQAVL--FDELLMVLEPVCDLVS-GLSPTVAVLG--ELK--  
PRQQQDLVAFQLVGC SLQGGCPGED-AGSKQLFMTAYFLVSALAEMPDSAAALLGTCC-KLQIPTLCHL--  
-LRALSDDGVSDLED-----PTLTPLK DTERF-  
GIVQRLFASADISLERLKSSVKAVILKDSKVFPLLLCITLNGLCALGREHS-----

>ref|NP 061239.1| chromosome 6 organism Mus musculus strain C57BL/6 gcode 1  
chromosome 6 map 6 gasdermin-E precursor Mus musculus

-----DGGQGISSQDGP--  
LRVVKQATLHLERSFHPFAVLPAQQQRALFCVLQKIL--FDEELLRALEQVCD DVAG-GLWSSQAVLAMEELT-  
-DSQQQDLTAFLQLVGYRIQGEHPGPQDEVSNQKLFATAYFLVSALAEMP DNATVFLGTCC-KLHVIVSLCCL-  
--LHALSDDSVCDFHN-----PTLAPLRDTERF-  
GIVQRLFASADIALERMQFSAKATILKDSCIFLILHITLSGLSTLSKEHEEELCQSGHATGQD-----

>ref|NP 001006361.1| chromosome 2 organism Gallus gallus breed Leghorn gcode 1  
chromosome 2 map 2 gasdermin-E Gallus gallus

-----FLFHPDAVDNGMYSGAENPVPSHAS--  
LSVLKKDLSQLKAQFQPFVKLPEDKQRALYKSLCELL--LHEETLTALEDVLDALCT-GDKPDLK-----ELK--  
PAQQQDLADFLQLVGC RVQDELLQNYHLQDELLSAAHLLISAISELSDYTLVLLRACS-DLQVVPALCCL---  
PYIASADGTLALSS-----PSVATLTDRRRF-  
DVAQRLFASANINLEKTETSVKAVTMREPRFFPLVLYVALCGLHSLGGTVEELF-----

>ref|NP 001180041.1| chromosome 4 organism Bos taurus breed Hereford gcode 1  
chromosome 4 map 4 gasdermin-E Bos taurus

-----DAGQGLPAQDKP--  
LSVLKQATLLERNFHPFMEPEQQQIALNDVLQAVL--LDEELLVVLEQVCD DIVS-SLSPSLVALG--ELK--  
PSQKHNLTTFLRLVGC SVQGERLGSQDVVDNQKLFSTAFFLVSALAEMP DNAAALLGTCC-KLQIIPLLYHL---  
LRALSHDGVSDLED-----PALAPLKDREKF-  
GIVQRLFAATDINLERMQSSVKAASREDPNVPLILYISLSGLCALGRAQ-----

>ref|XP 002933445.2| location chromosome chromosome 6 completeness complete organism  
Xenopus tropicalis strain Nigerian gcode 1 chromosome 6 sex female tissue type liver and blood  
dev stage adult nots

-----VLFDWVDV DGSKEAFVRKCILRSAP--  
LCLLREGIAAHEKHFS AWKQLPDVQCLELYTLLCQIL--YDGOALS KLHAVVEDLCS-KRKPTQAAFD--ELM--  
PSQRRIAENILYLSGYDMPNGKFLHAANR---ELLVALHILTSALNELSDSALAVLGTCC-ELQLLPVFSAL---  
MNMSSDEGLCSTTE-----PALMDFLDQERF-  
YVSQKLFALFNIELEIKEDFIYAATAEDPGFLPLILFIVITGLQLLKR D-----

>ref|XP 001096213.2| location chromosome chromosome 3 completeness complete organism Macaca mulatta isolate AG07107 bio material Coriell:AG07107 gcode 1 chromosome 3 sex female tissue type fibroblasta

-----DAAHGISSQDGP--  
LSVLKQVTPLLERNFHFPVELPEPQQTALSDIFQAVL--FDDELLMVLEPVCDDLVS-GLSPPMAVLG--ELK--  
LQQQQDLEAFLQLVGC SLHGGCPGED-TGSKQLFMTAYFLVSALSEMPDNAAALLGTCC-KLQIPTLCHL---  
LRVLSDDGVSDLED-----PTLAPLKDTERF-GIVQRLFASADISLERLKSSVKAVILKDSKVFP-  
LLCIALNGLCALGREHS-----

----

>ref|XP 006912063.1| chromosome Unknown completeness complete organism Pteropus alecto gcode 1 chromosome Unknown sex male tissue type kidney country Australia: Anglican Church Grammar School East Bro

-----DAWQGPPASDKP--  
LSVLKEVTLPLEKSRPFAELPEQQQTALSGILQAVL--FDDELLALEQVCDDVFS-DLSPRPVPG--ELK--  
PSQQQDLMAFLHLVGYSMQSGCPGEDAVSNQKLFSTAYFLVSALAEMPDNAAALLGTCC-KLQIPTLCHL-  
--LHVLSADGESDLED-----AALAPLRDTERF-  
EIVQRLAAADINLERQQSSVKAVTCQVNPVSPVLVYISLNGLWALGRMHQ-----

-----

>ref|XP 031796450.1| location chromosome chromosome 5 completeness complete organism Sarcophilus harrisii gcode 1 chromosome 5 cell line 91H gasdermin-E Sarcophilus harrisii

-----DSVDGKSEAVKLPVEGP--  
LSALKHGMLVLERNFRPFVLSGHRAALCEILWEVL--LDDELVALDVTLSVDLAGGRPRLWALP---GLS--  
PGQQQLAAFLGLAGLHVQEDSRVRRDARAPRELLSTAHLVSALAEMPDDTVALMGVCC-  
QLHLIPTLCHL---PQVTSADGVSELGD-----PSLAPLSDAGSF-  
EVVQKLFALSHISLERREAHVEAVIMKRPQYLPLVLYITLHGLCALEGKAE-----

-----

>ref|XP 027689547.1| location chromosome chromosome 2 completeness complete organism Chelonia mydas isolate rCheMyd1 gcode 1 chromosome 2 sex male tissue type blood dev stage adult country Israel: Mes

-----FLYQPDAVDSDRRSGDRNIVPSDAS--  
LSVLKQDLLLLKMQFQPFVKLPEDKQGALNKIFYELL--HHEEIVIALEEVLDSIFT-GEEPDFDLK--ELK--  
PPQQQNITDFLQLVGYSLQNELQKQDQLHYT-GLFSAAHILISAVAELSDYTLALLRACC-DIQIVPILCYL---  
PNVASADGTLTRD-----PALAPLTDGTRF-  
HIVQRLFALSINLEMMESSMKAVTMKEPSFFPFILYIALYGFYALGGTI-----

-----

>ref|XP 040208817.1| location chromosome chromosome 5 completeness complete organism Rana temporaria gcode 1 chromosome 5 gasdermin-E Rana temporaria

-----FDWDMVDLSRNISVDGKAVPSNYS--  
LSAIKSDILEITKPFVQLDLPEAHRGEIYNGLFEIL--HDGQTVTQLQAVVEEICL-EKRPGLTFLS--ELK--  
SPERAVVQKILHLIGYDMLNQLIEPFKK---DLSAVHLLTSALDEMPDTALAILGACC-KLHLLPALWAL---  
TNITSDEGLCSRTE-----PALTDLIHQGRF-QIAQSLFSFFNMRLNELNEKNIAVTS-  
EDPSLLPHILYIAISGFHALKNNLKI-----

-----

>ref|XP 023962559.1| location chromosome chromosome 2 completeness complete organism  
Chrysemys picta bellii isolate RCT428 sub species bellii gcode 1 chromosome 2 sex female  
country USA: Grant Co. ...

-----FLYQPDAVSDSRHSGDRNIIPSGAS--  
LSVLKQDLLLLKMQFQPFVKLPEDKQGALNKIFYEFL--HHEEMVTALEEVLDSICT-GEEPFDLTK--ELK--  
PPQQQNITDFLQLVGYSLQNEELLQNDQLHYKGLFSAAHILISAVAELSDYTLALLRACC-DIQIIPALCCL---  
PNVASADGTLTRD-----PALAPLTDTRF-  
DIVQRLFALSINLEMMESSVKAVTMKEPSFFPFIYALYGFYALGGTI-----

>ref|XP 029444983.1| location chromosome chromosome 2 completeness complete organism  
Rhinatrema bivittatum gcode 1 chromosome 2 gasdermin-E isoform X1 Rhinatrema bivittatum

-----YSWDVVDSGDRSMMNRNVVPSDAP-  
-LSLLKQDVLQQTQKIFQSFLELPEEKRSVLNKLCEIL--SHGETLTLEDVLLDICT-EHKPNLTALN--ELK--  
VEQQQNIKDLWPLLGLLENELLQPEKLQEKELLATHVLVSALEEMGDSPLAILRACC-ELHLMPLVCHL---  
LNSLSDDGTSMRDS-----  
LLSIFNDKGRFQIAQKLFSLNISLELTDNIRAVTKSEPGFLPLILSIISGFHVLAGTF-----

>ref|XP 004626528.1| chromosome Unknown completeness complete organism Octodon  
degus isolate 3935 gcode 1 chromosome Unknown sex female gasdermin-E Octodon degus

-----DAKHGMLSKDGL--  
LSVLKQATLPLERNFHPFVELPAQQQALHNLLQAVL--LDEELLVVLEQVCDDMAG-  
SVWSPQTALAMRALK--  
APQQQDLTAFLQLVGCISIQGECPSPEDEVSNQKLFATAYFLVSALAEMPDAALLGICC-KLQIIPPLYHM---  
LRALSDDGVCDLED-----PTLAPLRDTERF-  
GIVQRLFVATDINLEQEASVKAVILKDPHFPLILYITLNGLCALGREH-----

>ref|XP 021046698.1| location chromosome chromosome 2 completeness complete organism  
Mus pahari gcode 1 chromosome 2 sex female tissue type tail gasdermin-E Mus pahari

-----DGGQGISSQDGP--  
LRVVKQATLHLERSFHPFAVLPAQQQRALFCVLQKIL--FDEELLRALEQVCDDVAG-GLWSSQAISAMEELT--  
DSQQQDLTAFLQLVGYRIQGEHPGPQDAVSNQKLFATAYFLVSALAEMPDAVFLGTCC-KLHVSSLCCL--  
-LHALSDDSVCDFQD-----PALAPLRDTERF-  
GIVQRLFASADIALERMQFSAKATILKDCIFPLIHITLSGLSTLSKEHEEQLCQSEGHATGQD-----

>ref|XP 009324004.1| chromosome Unknown completeness complete organism Pygoscelis  
adeliae isolate BGI AS28 gcode 1 sex male country Antarctica chromosome Unknown  
PREDICTED: non-syndromic hearing impae

-----FLYQPDAVDNEMYSGAKNRIPSDAS--  
LSVLKQDLSWLKTQFQPFVKLPEDKQRALYKTLCELL--LHEEMVALEDLLDDICT-GDKPDLK-----ELK--  
PAQQQDLLGFLQLLGCSELQKYLQYQPQDEELLSAAHLLISAISELPDYTLVLLRACC-DLQVVPALCCL---  
PNIASADGTLALSS-----PLVATLTDTRF-  
DVVQRLFASSNITLEMTVSSVKAVTMKEPRFFPLVLYVALYGFYALGGNV-----

>ref|XP 024418892.1| chromosome Unknown completeness complete organism Desmodus rotundus isolate DRU21DN04 gcode 1 chromosome Unknown sex male tissue type muscle/skin sample dev stage adult country Us

-----DAGQGSPAPDEP--  
LSVLKQATLPLERAFHPFGQLPEQEQTALSGVLQVVL--FDEELLVVLEQVCDDMVG-GLPPSLAVLG--ELK--  
PPQKQNLMAFLQLVGCMSMQGECLGPQGVVSNQKLFSTAYFLVSALAEMPDNAAALLGTCC-  
KLQIIPALCHL---LRALSAGGEPDLED-----TALAPLRDTERF-  
GIVQCLLATASLDLERRQSSVKAVTCQVPNVSPVLVYVLSLGLHALGRAHQ-----

>ref|XP 016015046.2| chromosome Unknown completeness complete organism Rousettus aegyptiacus isolate mRouAeg1 gcode 1 chromosome Unknown sex male tissue type muscle dev stage adult country USA: Berkes

-----DAWQRPSASDKP--  
LSVLKQVSLPLERSFRPFAELPQQQTALSGILQAVL--FDEELLVALEQVCDDVFS-GLSPPRAMPG--ELK--  
PSQQQDLAAFLRLVGYVQSGCPGEDAVSNQKLFSTAYFLVSALAEMPDNAAALLGTCC-KLQMIPTLCHL-  
--LRALSADGESDLED-----AALAPLRDTERF-  
EIVQRLAAADIRLERRQSSVKAVTYPVPDVSQLVLYVSLNGLWALARMHQ-----

>ref|XP 032903802.1| location chromosome chromosome 2 completeness complete organism Amblyraja radiata isolate CabotCenter1 gcode 1 chromosome 2 sex male tissue type testis liver country USA: Gulf ofa

-----PLSCVDGAHKCQLSALEMDVPSETS--  
LIIKPAIEEANQQFQPFHELAEKCLQLFRLYCEFL--YHEEVISFLENALDELSS-TEQPNLLGLQ--ELD--  
STQAQRVKELLQILGYSCPNEQGSLLKDDITPEILTAIFYLVSALAGMSEESLAVLGICC-ETQILPTLHYL---  
INNVPDDGIVPVDN-----PNMLPLQEEDNF-  
YIAHRLFALSNICLEVRETAIKVITDDQPGMAPVLLCIVLQGFALSGIKRNTSDPKTQT-----

>ref|XP 001159685.3| location chromosome chromosome 7 completeness complete organism Pan troglodytes isolate Yerkes chimp pedigree \*C0471 (Clint) gcode 1 chromosome 7 sex male tissue type blood dev ss

-----DAAHGISSQDGP--  
LSVLKQATLLERNFHPFAELPEPQQTALSDIFQAVL--FDDELLMVLEPVCDDLVS-GLSPTVAVLG--ELK--  
PRQQQDLVAFLQLVGCSLQGGCPGED-AGSKQLFMTAYFLVSALAEMPDNAAALLGTCC-KLQIIPTLCHL--  
-LRALSDDGVSDLED-----PILTPLKDAERF-  
GIVQRLFASADISLERLKSSVKAVILKDSKVFPLLLCITLNLGALGREHS-----

#### PYD Alignment

>sp|Q8WXC3|PYDC1 HUMAN Pyrin domain-containing protein 1 OS=Homo sapiens OX=9606  
GN=PYDC1 PE=1 SV=1

-----MGTKREAIL-KVLENLTPEELKKFKMKLGTVPLREGFE---RIPRGALGQLDIV-DLTDKLVAS-  
-YEDYAAELVVAVLRDMR-----MLEEAAR-LQRAA-----

>NP 660183.1:1-88 apoptosis-associated speck-like protein containing a CARD isoform b Homo sapiens

-----MGRARDAIL-DALENLTAEELEKFKLKLKLLSVPLREGYG----RIPRGALLSMDAL-DLTDKLVSF-  
-YLETYGAE-LTANVLRDM-----GLQEMAG-QLQAA-----  
>NP 001104231.1 uncharacterized protein LOC796649 Danio rerio  
-----MASTKTEIL-DVLDELREERE---FKD---FKWRLSNKETLENSIPRGKLENADRQ-  
DVVDYMEQH--FGTSEAGK-VAVRL--LH-----SMNQNNL-AEQLKKTAVVSKV--  
>q919n6 danio asc  
-----MAESFKEHLQ-EAFEDLGADN---LRK---FKSKLGDRRQEP-  
RVTKSAIEKLDKDEIDLADLMVGV--FTSKDAVS-VTVEI--LR-----AIKCNVAV-ADDLLRNTGQS-----  
>q56p42 pydc2 human  
-----MASSAELDFNLQ-ALLEQLSQDELKFKS---LIRTISLGK----ELQTVPQTEVDKA-N-GKQLVEI--  
FTSHSCS--YWAGMAAIQ-----VFEEKMNQ-THLSGRADEHCVM---  
>q91vj1 pycard mouse  
-----MESEYREMLLLTGLDHITEEE---LKR---FKYFALTEF----QIARSTLDVADRT-ELADHLIQS--  
AGAASAVTKAINIFQKLN-----YMHIANA-LEEKKKE-----  
>o35368 ifi203 mouse  
-----MAEYKNIVLLKGLNEMEDYQ---FRT---VKSLLRKEL---KLTKKMQEDYDRI-  
QLADWMEDK--FPK---DA-GLDKL--IK-----VCEHIKD-LKD LAKK LKTEKAK--  
>q504j1 caspb danio  
-----LS-DVLEDLVESELKQFTR---QLWIGVKPGVE--PIPRGKLENKDRQ-DVVDSMVQQ--  
YSED-AGTITVQTL--RK-----IKQNERA-----  
>q919l7 caspa danio  
-----HLQ-DALSNIGADN---LRR---FQSRLGDRKQEP-RVRKSTIEKLDKDEIDLVDLLVNT--  
FTSD-AVS-VTVDI--LR-----GIKCNVAV-AE-----  
>tr|B2CWB9|B2CWB9 9POXV M013 OS=Myxoma virus OX=10273 GN=m013L PE=4 SV=1  
-----MEHRGVII-TVLENLSDYQ---FKM---FIYLAMEDL----YIERAEKEKIDRI-DLAHKISEQ--  
YLGTDYIE-FMKRV--TD-----FIPNKVY-VDSLLARAEADA----  
>NP 051902.1 Hypothetical protein SFV s013L Rabbit fibroma virus  
-----MEHRGVII-TVLENLTDYQ---FKM---FLYLVTEDEL----RINPVEKEKIDRI-DLAYKISEL--  
YPGHSYIE-FMKQV--TG-----YIPNKVY-VDSLLKNAEENT----  
>YP 227401.1 hypothetical protein DpV83gp024 Deerpox virus W-848-83  
-----MELRSAIL-AVLENINRYQ---FKM---VIFIVQDEL----YIEEEEKLTMDRI-DLAEKLIKK--YKD--  
-IR-SLYFL--LN-----IFKEMPD-TEFVKKQLSDYIKRF-  
>NP 073403.1 18L protein Yaba-like disease virus  
-----MLYTMRIKSAIL-FSLEDVTHYQ---FKI---LIFLTKDEL----NISDEEKQILDRV-DFAEKLFQT--  
YPG---IK-SLYFL--EK-----AISMVPN-AKYARSNINRLISDL-  
>ABQ43490.1 pyrin domain Tanapox virus  
-----MLYNMRIKSAIL-FSLEDVTHYQ---FKI---LIFLTKDEL----NINDEEKQILDRV-DFAEKLFQA--  
YPG---IK-SLYFL--EK-----AISMVPN-AKYARSNINRLISDL-  
>NP 570174.1 Hypothetical protein SWPVgp014 Swinepox virus  
-----MELRYTII-SVLERLTPYQ---FKT---LLFLIQDDI----NISNDDINVLDREV-DLAIKIMNK--YNN-  
--YR-AIYFL--YK-----VILRIHN-TEYISGTLQRSIQNI-  
>Vaccinia  
----MVKNNKISNSCRMIMSTNPNNILM-RHLKNLTDDE---FKC---IIHRSSDFL----YLSDSYTSITKE-  
TLVSEIVEE--YPDD-CNK-ILAI--FL-----VLDKDID-VDIET-----

>Buffalopox

-----MVKNNKISNSCLMIMSTNPNNILM-RHLKNLTDDE---FKC---IIHRSSDFL----YLSDDYTSITKE-  
TLVSEIVEE--YPDD-CNK-ILAI--FL-----VLDKDID-VDIET-----

>Cowpox

MVKSNKIQKNKISNSCRMIMSTNPNNILM-RHLKNLTDDE---FKC---IIHRSSDFL----YLSDRDYTSITKE-  
TLVSEIVEE--YPDD-CNK-ILAI--FL-----VLDKDID-VDIET-----

>Rabbitpox

-----MVKNNKISNSCLMIMSTDPNNILM-RHLKNLTDDE---FKC---IIHRSSDFL----YLSDRDYTSITKE-  
TLVSEIVEE--YPDD-CNK-ILAI--FL-----VLDKDID-VDIET-----

>Horsepox

-----MVKNNKISNSCLMIMSTDPNNILM-RHLKNLTDDE---FKC---IIHRSSDFL----YLSNRDYTSITKE-  
TLVSEIVEE--YPDD-CNK-ILAI--FL-----VLDKDID-VDIET-----

>Orthopox abatino

MVKNNKIQKIKTSNSYRDVIMTNPNNILM-RHLKNLTDDE---FKC---IVNRSSDFI----YLSDRDYTSITKE-  
TLVSEIVEE--YPDD-CNK-ILAI--FL-----VLGKDID-IETET-----

>Akhmeta virus

MVKSNKIQKNKISNSCRYMIMNTNTNILM-RHLKNLTDDE---FKC---IIHRSSDFL----YLSDRDYTSITKE-  
TLVSEIVEE--YQDD-CNK-ILAI--FL-----VLDKDID-VDIET-----

>Variola Virus

-----MIMSTDPNNILM-RYLKNLTDDE---FKC---IIHQSSDFL----YLSDRDYTSITKE-TLVSEIVEE--  
YPDD-CNK-ILAI--FL-----VLDKDID-VDIET-----

>Monkeypox

-----MIMRTDTNINILM-RHLKNLTDDE---FKC---IIHRSSDFL----YLSDRDYTSITKE-TLVSEIVEE--  
YPDD-CNK-ILAI--FL-----VLDKDID-VDIET-----

>Alaskapox

-----MNTILM-RHFKNLTDDE---FKC---IIHRSSDFI----YLSDRDYTSITKE-TLVSEIVEE--YPDD-  
CDK-ILAI--FL-----VLGKDIE-VDVKT-----

>Volepox

-----MANKNRLV-SYLKNLTDDE---FKC---IIRSSDFI----YLSDDHDTITKE-KLVKEIIEE--  
YPDD-CNK-ILAI--FL-----VLDKDID-IDIET-----

>Skunkpox

-----MNKNRLV-KYLKNLTDDE---FKC---IIRSSDFI----YLSDDHDNITRE-TLVKEIMEE--  
YPDD-CNK-ILAI--FL-----VLDKDID-LDIET-----

>Raccoonpox

-----MDVKNRIV-KYLKNLTDDE---FRY---IIRSSDFI----YLSGDHNTITKE-TLVNEIIEE--  
YPDD-CNK-IFAI--FL-----VLDIDID-LDTET-----

>NY 014 poxvirus

-----MDKIM-CYLNNITDEE---FET---VIDRSSNFL----YLSDDHNTITRE-SLAEIVEE--  
YPND-CER-ILAI--LL-----SLDKYIS-FESTI-----

>Murmansk poxvirus

-----MDKIT-HYLNITDGE---FET---VIDRSSNFL----YLSDDHNTITRE-SLAEIVEE--YPND-  
CER-ILAIL--LL-----SLDKYIS-FESTI-----

>Yoka poxvirus



-----MNKIL-NYFNSITDDE---FKT---IISISDFL----YLSNDNDNINITKE-SLAEILEQYPYPND-  
 YEK-ILSML--LL-----ALGKYVF-FETII-----  
 >QDJ94995.1 IFN-inducible protein Hypsugopox virus  
 -----MDSYTKGSIL-YALKNLTFQQ---LKE---FMFISSEQL----YLSNKDRLNFDVW-DLADRIIV--  
 CHDN-ALK-AFKLI--KE-----ILTMMES-VDFVINYMNKCIENTC  
 >QHG62576.1 hypothetical protein Cetacean poxvirus 1  
 -----MIDSKSLNVEIEVKIALM-RALDELSSYQ---LKV---LAFLTSNRV----CVIHRSMSNVDRV-  
 DIAKRINTT--LP---CVC-SLTYLRDLLKNVKHTESVRDILCEDINYIESIMRNNNEIKRFTC  
 >YP 009407969.1 IFN-inducible protein Eptesipox virus  
 -----MDAFTKGSTL-YALKNLTFNQ---LKE---FMFISSDGL----YLTHKNRLEFDVW-DLADRIIV--  
 NNNN-PLK-VFKHI--KE-----TLCLMDD-VEFVLKYIDKCIENCA

### GSDM Tree

((((((((((('AY484669.1:c159516-158782 Rabbitpox virus complete  
 genome':0.00000632,'KY349117.1:c166272-165538 Horsepox virus strain MNR complete  
 genome':0.00396044)0.5300:0.00000632,'M35027.1:c153690-152956 Vaccinia virus  
 Copenhagen complete genome':0.00396094)0.6900:0.00396040,('MG599038.1:c157906-  
 157148 Buffalopox virus isolate Karachi 2005 complete  
 genome':0.00000632,'AY243312.1:c154675-153917 Vaccinia virus WR complete  
 genome':0.00384602)0.7600:0.00398762)0.8500:0.01196656,'KC813500.1:c153312-152578  
 Cowpox virus strain MonKre08/4 complete  
 genome':0.00000632)0.2000:0.00001264,'MN912466.1:c156293-155559 Ectromelia virus WH  
 complete genome':0.01989595)0.6200:0.00395345,'NC 055231.1:c163765-163031  
 Orthopoxvirus Abatino complete  
 genome':0.00793905)0.5300:0.00641072,('MH607143.1:c167386-166652 Akhmeta virus isolate  
 Vani 2010 complete genome':0.02387728,(((('AY009089.1:c154402-154034 Camelpox virus CMS  
 complete genome':0.00000632,'MK910851.1:c154204-153836 Camelpox virus strain  
 Negev2016 complete genome':0.00808054)0.9200:0.02440740,'DQ437594.1:c153307-152573  
 Taterapox virus strain Dahomey 1968 complete  
 genome':0.01191498)0.3300:0.00000632,('KY358055.1:c145385-144651 Variola virus strain  
 VD21 17th century complete genome':0.00000632,('DQ441432.1:c146026-145292 Variola virus  
 strain Korea 1947 (Lee Masterseed) complete genome':0.00395560,'DQ441437.1:c146904-  
 146170 Variola virus strain Sierra Leone 1969 (V68-258) complete  
 genome':0.00000632)0.7700:0.00395750)0.8700:0.00793967)0.6500:0.01266543)0.3200:0.005  
 54384)0.5300:0.03253804,'MN240300.1:c166555-165827 Alaskapox virus complete  
 genome':0.11139866)0.9700:0.13966158,('KU749309.1:c145369-144644 Raccoonpox virus  
 strain 85A complete genome':0.10647955,('KU749310.1:c167631-166873 Skunkpox virus strain  
 WA complete genome':0.07403330,'KU749311.1:c169057-168281 Volepox virus strain CA  
 complete  
 genome':0.09493255)0.5900:0.02370722)0.4600:0.07236375)1.0000:0.50096918,('HQ849551.  
 1:c134784-134035 Yoka poxvirus strain DakArB 4268 complete  
 genome':0.41854758,('MF001305.1:c159640-158771 NY 014 poxvirus strain 2013 complete  
 genome':0.10644996,'MF001304.1:c160603-159728 Murmansk poxvirus strain LEIV-11411

complete

genome':0.06453801)0.8000:0.16035801)0.4100:0.07538004)1.0000:1.10608085,YP\_00940809  
7.1\_Immunoprevalent\_protein\_Eptesipox\_virus:0.88065310)0.5900:0.32061200,((NP\_051846.  
1\_m132L\_Myxoma\_virus:0.09720761,NP\_052021.1\_gp132L\_Rabbit\_fibroma\_virus:0.24063256  
)1.0000:1.72365406,('MF001304.1:c165763-165224 Murmansk poxvirus strain LEIV-11411  
complete genome':0.04040716,'MF001305.1:c164808-164269 NY 014 poxvirus strain 2013  
complete genome':0.11589372)0.8900:0.43947697,('KU749311.1:173861-174445 Volepox virus  
strain CA complete genome':0.03751514,('KU749310.1:172437-172985 Skunkpox virus strain  
WA complete genome':0.06828167,'KU749309.1:150174-150722 Raccoonpox virus strain 85A  
complete  
genome':0.09772203)0.6700:0.06086908)0.9400:0.42301996)1.0000:1.32178979)0.4300:0.417  
93913)0.6600:0.74188710,(((((((ref|NP\_113603.1|\_chromosome\_8\_organism\_Homo\_sapiens  
\_gcode\_1\_chromosome\_8\_map\_8q24.21\_gasdermin-C\_Homo\_sapiens:0.00648950,'ref|XP  
001153860.1|\_location\_chromosome\_chromosome\_8\_completeness\_complete\_organism\_Pan  
troglodytes\_isolate\_Yerkes\_chimp\_pedigree\_\*C0471\_(Clint)\_gcode\_1\_chromosome\_8\_sex\_male  
tissue\_type\_blood\_dev\_ss':0.01016408)0.7300:0.02356312,'ref|XP\_028708741.1|\_location  
chromosome\_chromosome\_8\_completeness\_complete\_organism\_Macaca\_mulatta\_isolate  
AG07107\_bio\_material\_Coriell:AG07107\_gcode\_1\_chromosome\_8\_sex\_female\_tissue\_type  
fibroblasta':0.05208806)1.0000:0.26393153,ref|XP\_019678683.1|\_location\_chromosome\_chro  
mosome\_F2\_completeness\_complete\_organism\_Felis\_catus\_isolate\_Cinnamon\_breed\_Abyssin  
ian\_gcode\_1\_chromosome\_F2\_sex\_female\_gasdermin-  
C\_Felis\_catus:0.41823708)0.1300:0.05011136,('ref|XP\_036088919.1|\_chromosome\_Unknown  
completeness\_complete\_organism\_Rousettus\_aegyptiacus\_isolate\_mRouAeg1\_gcode\_1  
chromosome\_Unknown\_sex\_male\_tissue\_type\_muscle\_dev\_stage\_adult\_country\_USA:  
Berkes':0.32082568,ref|XP\_024427836.1|\_chromosome\_Unknown\_completeness\_complete\_o  
rganism\_Desmodus\_rotundus\_isolate\_DRU21DN04\_gcode\_1\_chromosome\_Unknown\_sex\_ma  
le\_tissue\_type\_muscle/skin\_sample\_dev\_stage\_adult\_country\_Us:0.13881323)0.6000:0.09111  
937)0.1400:0.07902331,ref|NP\_001039469.1|\_chromosome\_14\_organism\_Bos\_taurus\_breed  
\_L1\_Hereford\_gcode\_1\_chromosome\_14\_map\_14\_gasdermin-  
C\_Bos\_taurus:0.55125872)0.3600:0.07430343,ref|XP\_021073018.1|\_location\_chromosome\_c  
hromosome\_17\_completeness\_complete\_organism\_Mus\_pahari\_gcode\_1\_chromosome\_17\_s  
ex\_female\_tissue\_type\_tail\_gasdermin-  
C\_Mus\_pahari:0.36366499)0.9800:0.59858814,ref|XP\_031803207.1|\_location\_chromosome\_c  
hromosome\_1\_completeness\_complete\_organism\_Sarcophilus\_harrisii\_gcode\_1\_chromosome  
\_1\_cell\_line\_91H\_gasdermin-C\_Sarcophilus\_harrisii:0.73800521)0.4200:0.14672251,(((ref|XP  
015154998.2|\_location\_chromosome\_chromosome\_27\_completeness\_complete\_organism\_Gallus  
gallus\_isolate\_bGalGal1\_gcode\_1\_chromosome\_27\_sex\_female\_tissue\_type\_blood\_country\_USA:  
Fayetteville\_lat  
ls':0.89302167,ref|XP\_029428328.1|\_location\_chromosome\_chromosome\_12\_completeness\_  
complete\_organism\_Rhinatrema\_bivittatum\_gcode\_1\_chromosome\_12\_gasdermin-  
A\_Rhinatrema\_bivittatum:1.13451927)0.3600:0.10801623,XP\_032891479.1\_gasdermin-  
A\_Amblyraja\_radiata:1.35621246)0.1500:0.21106408,(ref|NP\_081236.1|\_chromosome\_15\_or  
ganism\_Mus\_musculus\_strain\_C57BL/6\_gcode\_1\_chromosome\_15\_map\_15\_gasdermin-  
D\_Mus\_musculus:0.37973081,(((ref|NP\_079012.3|\_chromosome\_8\_organism\_Homo\_sapiens

\_gcode\_1\_chromosome\_8\_map\_8q24.3\_gasdermin-D\_Homo\_sapiens:0.00490946,'ref|XP\_009454389.2| location chromosome chromosome 8 completeness complete organism Pan troglodytes isolate Yerkes chimp pedigree \*C0471 (Clint) gcode 1 chromosome 8 sex male tissue type blood dev ss':0.03154543)0.9800:0.02755997,'ref|XP\_015001615.2| location chromosome chromosome 8 completeness complete organism Macaca mulatta isolate AG07107 bio material Coriell:AG07107 gcode 1 chromosome 8 sex female tissue type fibroblasta':0.02541537)1.0000:0.24655309,(ref|XP\_023104116.1|\_location\_chromosome\_chromosome\_F2\_completeness\_complete\_organism\_Felis\_catus\_isolate\_Cinnamon\_breed\_Abyssinian\_gcode\_1\_chromosome\_F2\_sex\_female\_gasdermin-D\_Felis\_catus:0.38688835,(ref|NP\_001039625.1|\_chromosome\_14\_organism\_Bos\_taurus\_breed\_Hereford\_gcode\_1\_chromosome\_14\_map\_14\_gasdermin-D\_Bos\_taurus:0.18906395,(ref|XP\_024428237.1|\_chromosome\_Unknown\_completeness\_complete\_organism\_Desmodus\_rotundus\_isolate\_DRU21DN04\_gcode\_1\_chromosome\_Unknown\_sex\_male\_tissue\_type\_muscle/skin\_sample\_dev\_stage\_adult\_country\_Us:0.22927157,(ref|XP\_006913014.1| chromosome Unknown completeness complete organism Pteropus alecto gcode 1 chromosome Unknown sex male tissue type kidney country Australia: Anglican Church Grammar School East Bro':0.05855083,'ref|XP\_036089037.1| chromosome Unknown completeness complete organism Rousettus aegyptiacus isolate mRouAeg1 gcode 1 chromosome Unknown sex male tissue type muscle dev stage adult country USA: Berkes':0.07916446)0.9600:0.08309248)0.6600:0.09456772)0.6500:0.07865023)0.8200:0.11484867)0.5700:0.05693998)1.0000:0.51206201)0.1000:0.19500033)0.0200:0.03306529)0.0000:0.15081324,((sp|Q5Y4Y6|GSDA3\_MOUSE\_Gasdermin-A3\_OS\_Mus\_musculus\_OX\_10090\_GN\_Gsdma3\_PE\_1\_SV\_1:0.02992407,sp|Q32M21|GSDA2\_MOUSE\_Gasdermin-A2\_OS\_Mus\_musculus\_OX\_10090\_GN\_Gsdma2\_PE\_2\_SV\_1:0.08079961)0.5000:0.01350323,(sp|Q9EST1|GSDMA\_MOUSE\_Gasdermin-A\_OS\_Mus\_musculus\_OX\_10090\_GN\_Gsdma\_PE\_2\_SV\_1:0.01547699,(((ref|XP\_016020091.2| chromosome Unknown completeness complete organism Rousettus aegyptiacus isolate mRouAeg1 gcode 1 chromosome Unknown sex male tissue type muscle dev stage adult country USA: Berkes':0.00923641,'ref|XP\_006924750.1| chromosome Unknown completeness complete organism Pteropus alecto gcode 1 chromosome Unknown sex male tissue type kidney country Australia: Anglican Church Grammar School East Bro':0.01784865)0.9500:0.03854298,ref|XP\_024429158.1|\_chromosome\_Unknown\_completeness\_complete\_organism\_Desmodus\_rotundus\_isolate\_DRU21DN04\_gcode\_1\_chromosome\_Unknown\_sex\_male\_tissue\_type\_muscle/skin\_sample\_dev\_stage\_adult\_country\_Us:0.07730313)0.4600:0.00685917,(ref|XP\_035935879.1|\_chromosome\_Unknown\_completeness\_complete\_organism\_Halichoerus\_grypus\_isolate\_241Hg\_ecotype\_Northwest\_Atlantic\_gcode\_1\_chromosome\_Unknown\_sex\_male\_tissue\_type\_blood\_dev\_stage\_molts:0.09006814,((ref|XP\_024836266.1|\_location\_chromosome\_chromosome\_19\_completeness\_complete\_organism\_Bos\_taurus\_isolate\_L1\_Dominette\_01449\_registration\_number\_42190680\_breed\_Hereford\_gcode\_1\_chromosome\_19\_sex\_fem...:0.07277097,ref|XP\_004633937.1|\_chromosome\_Unknown\_completeness\_complete\_organism\_Octodon\_degus\_isolate\_3935\_gcode\_1\_chromosome\_Unknown\_sex\_female\_gasdermin-A\_Octodon\_degus:0.08986357)0.0600:0.00538989,(ref|XP\_014975037.1| location chromosome chromosome 16 completeness complete organism Macaca

mulatta isolate AG07107 bio material Coriell:AG07107 gcode 1 chromosome 16 sex female tissue type fibroblaa':0.03818418,(ref|NP\_835465.2|\_chromosome\_17\_organism\_Homo\_sapiens\_gcode\_1\_chromosome\_17\_map\_17q21.1\_gasdermin-A\_Homo\_sapiens:0.00536674,'ref|XP\_001171222.1| location chromosome chromosome 17 completeness complete organism Pan troglodytes isolate Yerkes chimp pedigree \*C0471 (Clint) gcode 1 chromosome 17 sex male tissue type blood devs':0.00000632)0.5100:0.01070020)0.9800:0.04354841)0.1500:0.00623461)0.1800:0.00553476)0.8000:0.06299807)0.7900:0.04239040)0.9900:0.44258489,((((('ref|XP\_024897515.1| chromosome Unknown completeness complete organism Pteropus alecto gcode 1 chromosome Unknown sex male tissue type kidney country Australia: Anglican Church Grammar School East Bro':0.06586777,'ref|XP\_036078993.1| chromosome Unknown completeness complete organism Rousettus aegyptiacus isolate mRouAeg1 gcode 1 chromosome Unknown sex male tissue type muscle dev stage adult country USA: Berkes':0.09991046)1.0000:0.11539316,ref|XP\_024429114.1|\_chromosome\_Unknown\_completeness\_complete\_organism\_Desmodus\_rotundus\_isolate\_DRU21DN04\_gcode\_1\_chromosome\_Unknown\_sex\_male\_tissue\_type\_muscle/skin\_sample\_dev\_stage\_adult\_country\_Us:0.21763352)0.4000:0.02806263,ref|XP\_035935913.1|\_chromosome\_Unknown\_completeness\_complete\_organism\_Halichoerus\_grypus\_isolate\_241Hg\_ecotype\_Northwest\_Atlantic\_gcode\_1\_chromosome\_Unknown\_sex\_male\_tissue\_type\_blood\_dev\_stage\_molts:0.34581838)0.2500:0.03004080,ref|NP\_001231146.1|\_chromosome\_19\_organism\_Bos\_taurus\_gcode\_1\_chromosome\_19\_map\_19\_gasdermin-B\_Bos\_taurus:0.26530564)0.4800:0.09159899,('ref|XP\_014975035.1| location chromosome chromosome 16 completeness complete organism Macaca mulatta isolate AG07107 bio material Coriell:AG07107 gcode 1 chromosome 16 sex female tissue type fibroblaa':0.11006455,(ref|NP\_001159430.1|\_chromosome\_17\_organism\_Homo\_sapiens\_gcode\_1\_chromosome\_17\_map\_17q21.1\_gasdermin-B\_isoform\_3\_Homo\_sapiens:0.01869987,'ref|XP\_009430521.1| location chromosome chromosome 17 completeness complete organism Pan troglodytes isolate Yerkes chimp pedigree \*C0471 (Clint) gcode 1 chromosome 17 sex male tissue type blood devs':0.01689996)0.9400:0.05518121)1.0000:0.07184298)1.0000:0.50473782,ref|XP\_023358160.1|\_location\_chromosome\_chromosome\_4\_completeness\_complete\_organism\_Sarcophilus\_harrisii\_gcode\_1\_chromosome\_4\_cell\_line\_91H\_gasdermin-B\_Sarcophilus\_harrisii:0.56088280)0.9600:0.33170458,('ref|XP\_032903802.1| location chromosome chromosome 2 completeness complete organism Amblyraja radiata isolate CabotCenter1 gcode 1 chromosome 2 sex male tissue type testis liver country USA: Gulf ofa':0.57159834,((ref|XP\_002933445.2|\_location\_chromosome\_chromosome\_6\_completeness\_complete\_organism\_Xenopus\_tropicalis\_strain\_Nigerian\_gcode\_1\_chromosome\_6\_sex\_female\_tissue\_type\_liver\_and\_blood\_dev\_stage\_adult\_not:0.58041056,ref|XP\_040208817.1|\_location\_chromosome\_chromosome\_5\_completeness\_complete\_organism\_Rana\_temporaria\_gcode\_1\_chromosome\_5\_gasdermin-E\_Rana\_temporaria:0.43530056)0.7400:0.37086991,ref|XP\_029444983.1|\_location\_chromosome\_chromosome\_2\_completeness\_complete\_organism\_Rhinatrema\_bivittatum\_gcode\_1\_chromosome\_2\_gasdermin-E\_isoform\_X1\_Rhinatrema\_bivittatum:0.30113784)0.5100:0.13675007,(((ref|NP\_001006361.1

|\_chromosome\_2\_organism\_Gallus\_gallus\_breed\_Leghorn\_gcode\_1\_chromosome\_2\_map\_2\_gasdermin-E\_Gallus\_gallus:0.14607108,'ref|XP\_009324004.1| chromosome Unknown completeness complete organism Pygoscelis adeliae isolate BGI AS28 gcode 1 sex male country Antarctica chromosome Unknown PREDICTED: non-syndromic hearing impae':0.06555493)1.0000:0.18747693,'ref|XP\_027689547.1| location chromosome chromosome 2 completeness complete organism Chelonia mydas isolate rCheMyd1 gcode 1 chromosome 2 sex male tissue type blood dev stage adult country Israel: Mes':0.07982534,'ref|XP\_023962559.1| location chromosome chromosome 2 completeness complete organism Chrysemys picta bellii isolate RCT428 sub species bellii gcode 1 chromosome 2 sex female country USA: Grant Co. ...':0.01125944)0.9900:0.09327687)0.9600:0.15059215,(ref|XP\_031796450.1|\_location\_chromosome\_chromosome\_5\_completeness\_complete\_organism\_Sarcophilus\_harrisii\_gcode\_1\_chromosome\_5\_cell\_line\_91H\_gasdermin-E\_Sarcophilus\_harrisii:0.49835971,(((ref|XP\_006912063.1| chromosome Unknown completeness complete organism Pteropus alecto gcode 1 chromosome Unknown sex male tissue type kidney country Australia: Anglican Church Grammar School East Bro':0.04540917,'ref|XP\_016015046.2| chromosome Unknown completeness complete organism Rousettus aegyptiacus isolate mRouAeg1 gcode 1 chromosome Unknown sex male tissue type muscle dev stage adult country USA: Berkes':0.06765941)1.0000:0.10802648,ref|XP\_024418892.1|\_chromosome\_Unknown\_completeness\_complete\_organism\_Desmodus\_rotundus\_isolate\_DRU21DN04\_gcode\_1\_chromosome\_Unknown\_sex\_male\_tissue\_type\_muscle/skin\_sample\_dev\_stage\_adult\_country\_Us:0.12144140)0.9300:0.07802127,ref|NP\_001180041.1|\_chromosome\_4\_organism\_Bos\_taurus\_breed\_Hereford\_gcode\_1\_chromosome\_4\_map\_4\_gasdermin-E\_Bos\_taurus:0.16311047)0.7200:0.04030548,(((ref|NP\_001120925.1|\_chromosome\_7\_organism\_Homo\_sapiens\_gcode\_1\_chromosome\_7\_map\_7p15.3\_gasdermin-E\_isoform\_a\_Homo\_sapiens:0.00453124,'ref|XP\_001159685.3| location chromosome chromosome 7 completeness complete organism Pan troglodytes isolate Yerkes chimp pedigree \*C0471 (Clint) gcode 1 chromosome 7 sex male tissue type blood dev ss':0.00911979)0.9900:0.01107332,'ref|XP\_001096213.2| location chromosome chromosome 3 completeness complete organism Macaca mulatta isolate AG07107 bio material Coriell:AG07107 gcode 1 chromosome 3 sex female tissue type fibroblasta':0.05555503)1.0000:0.14905206,(ref|XP\_004626528.1|\_chromosome\_Unknown\_completeness\_complete\_organism\_Octodon\_degus\_isolate\_3935\_gcode\_1\_chromosome\_Unknown\_sex\_female\_gasdermin-E\_Octodon\_degus:0.14112392,(ref|NP\_061239.1|\_chromosome\_6\_organism\_Mus\_musculus\_strain\_C57BL/6\_gcode\_1\_chromosome\_6\_map\_6\_gasdermin-E\_precursor\_Mus\_musculus:0.01643603,ref|XP\_021046698.1|\_location\_chromosome\_chromosome\_2\_completeness\_complete\_organism\_Mus\_pahari\_gcode\_1\_chromosome\_2\_sex\_female\_tissue\_type\_tail\_gasdermin-E\_Mus\_pahari:0.04506946)1.0000:0.24424411)0.8800:0.06822000)0.6100:0.02349932)1.0000:0.29867710)1.0000:0.32476703)0.9400:0.23585091)0.6400:0.34461861)1.0000:1.77119903)0.0100:0.08220955);

PYD Tree

(sp\_Q8WXC3\_PYDC1\_HUMAN:0.0000021986,NP\_660183.1\_1-  
88:0.8189957255,(((NP\_001104231.1:0.5582152076,(q919n6\_danio:0.1596274241,q919l7\_cas  
pa:0.1464068014)100:1.6604787690)78:0.3649286491,q504j1\_caspb:0.8779213839)75:0.3248  
494404,q91vj1\_pycard:1.3275505794)53:0.3488003785,(q56p42\_pydc2:2.4248812488,(((o353  
68\_ifi203:1.9252008714,(tr\_B2CWB9\_B2CWB9\_9POXV:0.1873719086,NP\_051902.1:0.1151924  
580)98:0.8588394249)30:0.1685723872,QHG62576.1\_hypothetical:1.3381578798)25:0.020581  
3423,((YP\_227401.1:0.4922697513,((NP\_073403.1:0.0000024848,ABQ43490.1\_pyrin:0.032263  
9322)100:0.5536693021,NP\_570174.1:0.6631629338)89:0.1050133382)91:0.2980680604,(QDJ  
94995.1\_IFN-  
inducible:0.0322861746,YP\_009407969.1:0.3451439803)100:1.1424169120)56:0.1652826846)  
38:0.2909839033,((((Vaccinia:0.0000024478,(Cowpox:0.0000024085,((Orthopox\_abatino:0.10  
55672911,Alaskapox:0.0953186299)96:0.0427250561,Akhmeta\_virus:0.0648530371)92:0.0274  
133695)92:0.0511067176)53:0.0098506539,Buffalopox:0.0000023745)51:0.0083698252,(Rabbi  
tpox:0.0000027502,((Horsepox:0.0531890168,Variola\_Virus:0.0358970206)28:0.0000020161,  
Monkeypox:0.0242749897)26:0.0000027502)32:0.0115162760)97:0.2153206803,(Volepox:0.0  
403124363,Skunkpox:0.0547150846)81:0.0431585044)36:0.0492731175,Raccoonpox:0.084855  
2751)84:0.2158394416,((NY\_014:0.0278797725,Murmansk\_poxvirus:0.0311930000)97:0.1567  
232511,Yoka\_poxvirus:0.3046051547)97:0.3533709024)96:0.7863255573)26:0.1931065783)79  
:0.4863747229)100:0.9712551055);

```

#!/bin/bash

#checks to ensure that matching files are present in both folders

for tmfile in TM/*; do
    name=${tmfile##*/}

    if [ -f "FATCAT/$name" ]; then
        echo "$name"
    else
        echo "$name is MISSING in FATCAT folder"
    fi
done

for fatfile in FATCAT/*; do
    name=${fatfile##*/}

    if [ -f "TM/$name" ]; then
        echo "$name"
    else
        echo "$name is MISSING in TM folder"
    fi
done

```

---

### AlphaFold parameters

```

# explicit run of run_alphafold pointing to the appropriate databases on the RAM disk, for file
passed in as $1
singularity exec --nv /uufs/chpc.utah.edu/sys/installdir/alphafold/2.1.2/alphafold_2.1.2.sif
/app/run_alphafold.sh --data_dir=/scratch/general/lustre/app-repo/alphafold --
uniref90_database_path=/scratch/general/lustre/app-repo/alphafold/uniref90/uniref90.fasta -
-mgnify_database_path=/scratch/general/lustre/app-
repo/alphafold/mgnify/mgy_clusters_2018_12.fa --
uniclust30_database_path=/dev/shm/af/uniclust30_2018_08 --
bfd_database_path=/dev/shm/af/bfd_metaclust_clu_complete_id30_c90_final_seq.sorted_opt
--pdb70_database_path=/dev/shm/af/pdb70 --
template_mmcif_dir=/scratch/general/nfs1/app-repo/alphafold/pdb_mmcif/mmcif_files --
obsolete_pdbs_path=/scratch/general/nfs1/app-repo/alphafold/pdb_mmcif/obsolete.dat --
fasta_paths=$1 --max_template_date=2020-05-14 --output_dir=temp_module --use_gpu_relax

```

Example FATCAT call for file passed in as \$1

```
FATCATSearch.pl $1 /scratch/general/vast/user_directory/drome_v2/chain_list-drome-fatcat -i
/scratch/general/vast/user_directory/drome_v2/ -q > $1.drosophila.FATCAT.txt &
```

Example TM-align call for file passed in as \$FILE

```
TMalign -dir1 /home/ian/AlphaDat/Proteomes/human_v2/
/home/ian/AlphaDat/Proteomes/human_v2/chain_list $FILE -outfmt 2 -fast > $FILE.human.txt
&
```

---

```
#!/bin/bash
```

```
#this file extracts hit name, score, opt-rmsd, align-len, and P-value from a fatcat file in a format
suitable for further processing
```

```
#IB 3.21.2022
```

```
for FILE in *FATCAT.txt
```

```
do
```

```
    outfile="$FILE.scores.txt"
```

```
    echo "Model Score RMSD Aligned P-value" >> $outfile
```

```
    reading=0 #0 before read, 1 when alignment found
```

```
    while read line
```

```
    do
```

```
        if [[ ${line:0:5} == "Align" ]] #we found a new entry
```

```
        then
```

```
            reading=1
```

```
            string="${line#*with *}"
```

```
            desired="${string%.pdb*}"
```

```
            echo -n $desired >> $outfile
```

```
        else
```

```
            if ((reading == 1))
```

```
            then
```

```
                string="${line#*Score *}"
```

```
                desired="${string% align*}"
```

```
                echo -n " $desired" >> $outfile
```

```
                string="${line#*opt-rmsd *}"
```

```
                desired="${string% chain*}"
```

```
                echo -n " $desired" >> $outfile
```



```

        string="{line#*align-len *}"
        desired="{string% gaps*}"
        echo -n " $desired" >> $outfile
        reading=2
    else
        if ((reading == 2))
        then
            string="{line#*P-value *}"
            desired="{string% Afp*}"
            echo " $desired" >> $outfile
            reading=0
        fi
    fi
done < $FILE
done

```

---

#FATCAT and TAlign data visualization v0.2

#IB 11.28.2022

#Requires properly-formatted TM-align + FATCAT datafiles

#Requires a "working\_prot.txt" list of input files

#change working directory as appropriate

#This script has been adapted to produce a figure suitable for import into illustrator as an SVG

#next: work on limiting "too many hit" plots

```
library(ggplot2)
```

```
library(ggimage)
```

```
library(ggrepel)
```

```
library(ggnewscale)
```

```
library(svglite)
```

```
protList <- read.table("/home/ian/homology_search/fcresults/working_prot.txt")
```

```
protList <- unlist(protList)
```

```
cols <- c("Mouse" = "paleturquoise1", "Human" = "mediumspringgreen", "Danio" = "plum1",
"Fly" = "khaki1")
```

```
for (protein in protList) {
```

```
  setwd("/home/ian/homology_search/fcresults/fat_tm_merge/converted")
```

```
  hasHits <- 0
```

```

mouseData <- read.table(header = TRUE, text=gsub(" ", "\t",
readLines(paste(protein, ".pdb.mouse.txt", sep="")))
humanData <- read.table(header = TRUE, text=gsub(" ", "\t",
readLines(paste(protein, ".pdb.human.txt", sep="")))
danioData <- read.table(header = TRUE, text=gsub(" ", "\t",
readLines(paste(protein, ".pdb.danio.txt", sep="")))
flyData <- read.table(header = TRUE, text=gsub(" ", "\t",
readLines(paste(protein, ".pdb.drosophila.txt", sep="")))

#append source genome name - used later when annotating graphs
mouseData$Proteome <- "Mouse"
humanData$Proteome <- "Human"
danioData$Proteome <- "Danio"
flyData$Proteome <- "Fly"

testData <- merge(humanData, mouseData, all = TRUE)
testData <- merge(testData, danioData, all = TRUE)
testData <- merge(testData, flyData, all = TRUE)

#Hits defined as TM score > 0.6 AND FATCAT P-value < 0.01
hits <- testData[testData$TM2 > 0.6, ]
hits <- hits[-log10(hits$P.value)>2, ]

#if no hits, instead label the top .01% of results from each tool
if (nrow(hits)>0){
  finalLabel <- hits
  hasHits <- 1
} else {
  topP <- quantile(-log10(testData$P.value), probs = .9999)
  topTM <- quantile(testData$TM2, probs = .9999)
  toLabel <- testData[testData$TM2>topTM, ]
  toLabel2 <- testData[-log10(testData$P.value)>topP, ]
  toLabel3 <- rbind(toLabel, toLabel2)
  finalLabel <- unique(toLabel3)
}

if(hasHits) {
  graphTitle<-protein
} else {
  graphTitle<-paste(protein, ": No hits, top-scoring values are indicated")
}

p <- ggplot(testData, aes(x=TM2, y=(-log10(P.value)))) +

```

```

ggtitle(graphTitle) +
xlab("TM Score") +
ylab(bquote(Log[10]~P-value~FATCAT)) +
geom_point(data = humanData, aes(x=TM2, y=(-log10(P.value)), size=1,
color=factor(cut(RMSD.1, c(0,2,3,5,Inf)))))) +
geom_point(data = mouseData, aes(x=TM2, y=(-log10(P.value)), size=1,
color=factor(cut(RMSD.1, c(0,2,3,5,Inf)))))) +
geom_point(data = danioData, aes(x=TM2, y=(-log10(P.value)), size=1,
color=factor(cut(RMSD.1, c(0,2,3,5,Inf)))))) +
geom_point(data = flyData, aes(x=TM2, y=(-log10(P.value)), size=1,
color=factor(cut(RMSD.1, c(0,2,3,5,Inf)))))) +
labs(color="RMSD")+
scale_color_brewer(palette="YlGn", labels = c("0-1","2-3","3-5","5+"), direction=-1,
drop=FALSE) +
new_scale_color() +
new_scale_fill() +
geom_label_repel(data = finalLabel, aes(label=Gene, fill=Proteome),
#color = rep(c("green","red","yellow","blue")[as.factor(finalLabel$Proteome)],times
= 2),
size = 6,
seed = 2, box.padding = 1, nudge_x = 0, min.segment.length = 0, segment.size = 1,
segment.color="darkslategrey", max.overlaps = Inf)+ #Inf overlaps leads to issues
scale_fill_manual(values = cols,
labels = c("Mouse", "Human", "Danio", "Fly")) +

guides(fill = guide_legend(override.aes = aes(color = NA))) +
guides(size = "none") +

theme(
panel.background = element_blank(),
panel.border = element_blank(),
panel.grid.major = element_line(size = 0.1, color = "black", linetype = "dashed"),
panel.grid.minor = element_blank(),
axis.line = element_line(color="black"),
axis.text = element_text(size = 22),
axis.title = element_text(size = 30),
plot.title = element_text(hjust = 0.5, size = 30),
legend.text = element_text(size = 22),
legend.title = element_text(size = 22),
legend.position = c(0.15, 0.8)
)

setwd("/home/ian/homology_search/fcresults")
#change to SVG to import into illustrator, etc

```

```
ggsave(filename = paste(protein, ".png", sep = ""), plot = p, width = 8, height = 8)
}
```

---

```
#FATCAT and TAlign data visualization v0.2
```

```
#IB 12.14.22
```

```
#Requires properly-formatted TM-align + FATCAT datafiles
```

```
#Requires a "working_prot.txt" list of input files
```

```
#change working directory as appropriate
```

```
#next: work on limiting "too many hit" plots
```

```
library(ggplot2)
```

```
library(ggimage)
```

```
library(ggrepel)
```

```
library(ggnewscale)
```

```
protList <- read.table("/home/ian/homology_search/fcreports/working_prot.txt")
```

```
protList <- unlist(protList)
```

```
cols <- c("Mouse" = "paleturquoise1", "Human" = "mediumspringgreen", "Danio" = "plum1",  
"Fly" = "khaki1")
```

```
for (protein in protList) {
```

```
  setwd("/home/ian/homology_search/fcreports/fat_tm_merge/converted")
```

```
  hasHits <- 0
```

```
  mouseData <- read.table(header = TRUE, text=gsub(" ", "\t",  
readLines(paste(protein, ".pdb.mouse.txt", sep = ""))))
```

```
  humanData <- read.table(header = TRUE, text=gsub(" ", "\t",  
readLines(paste(protein, ".pdb.human.txt", sep = ""))))
```

```
  danioData <- read.table(header = TRUE, text=gsub(" ", "\t",  
readLines(paste(protein, ".pdb.danio.txt", sep = ""))))
```

```
  flyData <- read.table(header = TRUE, text=gsub(" ", "\t",  
readLines(paste(protein, ".pdb.drosophila.txt", sep = ""))))
```

```
  #append source genome name - used later when annotating graphs
```

```
  mouseData$Proteome <- "Mouse"
```

```
  humanData$Proteome <- "Human"
```

```
  danioData$Proteome <- "Danio"
```

```
  flyData$Proteome <- "Fly"
```

```
  testData <- merge(humanData, mouseData, all = TRUE)
```

```
  testData <- merge(testData, danioData, all = TRUE)
```

```

testData <- merge(testData, flyData, all = TRUE)

#Hits defined as TM score > 0.6 AND FATCAT P-value < 0.01
hits <- testData[testData$TM2 > 0.6, ]
hits <- hits[-log10(hits$P.value)>2, ]

#if no hits, instead label the top .01% of results from each tool

topP <- quantile(-log10(testData$P.value), probs = .9999)
topTM <- quantile(testData$TM2, probs = .9999)
toLabel <- testData[testData$TM2>topTM, ]
toLabel2 <- testData[-log10(testData$P.value)>topP, ]
toLabel3 <- rbind(toLabel, toLabel2)
finalLabel <- unique(toLabel3)

if(hasHits) {
  graphTitle<-protein
} else {
  graphTitle<-paste(protein, ": No hits, top-scoring values are indicated")
}

p <- ggplot(testData, aes(x=TM2, y=(-log10(P.value)))) +
  ggtitle(graphTitle) +
  xlab("TM Score") +
  ylab(bquote(Log[10]~P-value~FATCAT)) +
  geom_point(data = humanData, aes(x=TM2, y=(-log10(P.value)), size=1,
color=factor(cut(RMSD.1, c(0,2,3,5,Inf))))) +
  geom_point(data = mouseData, aes(x=TM2, y=(-log10(P.value)), size=1,
color=factor(cut(RMSD.1, c(0,2,3,5,Inf))))) +
  geom_point(data = danioData, aes(x=TM2, y=(-log10(P.value)), size=1,
color=factor(cut(RMSD.1, c(0,2,3,5,Inf))))) +
  geom_point(data = flyData, aes(x=TM2, y=(-log10(P.value)), size=1,
color=factor(cut(RMSD.1, c(0,2,3,5,Inf))))) +
  labs(color="RMSD")+
  scale_color_brewer(palette="YlGn", labels = c("0-1", "2-3", "3-5", "5+"), direction=-1,
drop=FALSE) +
  new_scale_color() +
  new_scale_fill() +
  geom_label_repel(data = finalLabel, aes(label=Entry, fill=Proteome),
  #color = rep(c("green", "red", "yellow", "blue")[as.factor(finalLabel$Proteome)], times
= 2),
  seed = 2, box.padding = 1, nudge_x = 0, min.segment.length = 0, segment.size = 1,
segment.color="darkslategrey", max.overlaps = Inf)+ #Inf overlaps leads to issues

```

```

scale_fill_manual(values = cols,
                  labels = c("Mouse", "Human", "Danio", "Fly")) +

guides(fill = guide_legend(override.aes = aes(color = NA))) +
guides(size = "none") +

theme(
  panel.background = element_blank(),
  panel.border = element_blank(),
  panel.grid.major = element_line(size = 0.1, color = "black", linetype = "dashed"),
  panel.grid.minor = element_blank(),
  axis.line = element_line(color="black"),

  plot.title = element_text(hjust = 0.5),
  legend.position = c(0.06, 0.75)
)

setwd("/home/ian/homology_search/fcresults")
ggsave(filename = paste(protein,"_toponly_uniprot.png",sep=""), plot = p, width = 8, height =
8)
}

```

---

```

#FATCAT and TMalign data visualization v0.2
#IB 10.11.2022
#Requires properly-formatted TM-align + FATCAT datafiles
#Requires a "working_prot.txt" list of input files
#change working directory as appropriate

library(ggplot2)
library(ggimage)
library(ggrepel)
library(ggnewscale)

protList <- read.table("/home/ian/homology_search/fcresults/working_prot.txt")
protList <- unlist(protList)

cols <- c("Mouse" = "paleturquoise1", "Human" = "mediumspringgreen", "Danio" = "plum1",
"Fly" = "khaki1")

for (protein in protList) {

```

```

setwd("/home/ian/homology_search/fcresults/fat_tm_merge/converted")
hasHits <- 0
mouseData <- read.table(header = TRUE, text=gsub(" ", "\t",
readLines(paste(protein, ".pdb.mouse.txt", sep=""))))
humanData <- read.table(header = TRUE, text=gsub(" ", "\t",
readLines(paste(protein, ".pdb.human.txt", sep=""))))
danioData <- read.table(header = TRUE, text=gsub(" ", "\t",
readLines(paste(protein, ".pdb.danio.txt", sep=""))))
flyData <- read.table(header = TRUE, text=gsub(" ", "\t",
readLines(paste(protein, ".pdb.drosophila.txt", sep=""))))

#append source genome name - used later when annotating graphs
mouseData$Proteome <- "Mouse"
humanData$Proteome <- "Human"
danioData$Proteome <- "Danio"
flyData$Proteome <- "Fly"

testData <- merge(humanData, mouseData, all = TRUE)
testData <- merge(testData, danioData, all = TRUE)
testData <- merge(testData, flyData, all = TRUE)

#Hits defined as TM score > 0.6 AND FATCAT P-value < 0.01
hits <- testData[testData$TM2 > 0.6, ]
hits <- hits[-log10(hits$P.value)>2, ]

#if no hits, instead label the top .01% of results from each tool
if (nrow(hits)>0){
  finalLabel <- hits
  hasHits <- 1
} else {
  topP <- quantile(-log10(testData$P.value), probs = .9999)
  topTM <- quantile(testData$TM2, probs = .9999)
  toLabel <- testData[testData$TM2>topTM, ]
  toLabel2 <- testData[-log10(testData$P.value)>topP, ]
  toLabel3 <- rbind(toLabel, toLabel2)
  finalLabel <- unique(toLabel3)
}

if(hasHits) {
  graphTitle<-protein
} else {
  graphTitle<-paste(protein, ": No hits, top-scoring values are indicated")
}

```

```

p <- ggplot(testData, aes(x=TM2, y=(-log10(P.value)))) +
  ggtitle(graphTitle) +
  xlab("TM Score") +
  ylab(bquote(Log[10]~P-value~FATCAT)) +
  geom_point(data = humanData, aes(x=TM2, y=(-log10(P.value)), size=1,
color=factor(cut(RMSD.1, c(0,2,3,5,Inf))))) +
  geom_point(data = mouseData, aes(x=TM2, y=(-log10(P.value)), size=1,
color=factor(cut(RMSD.1, c(0,2,3,5,Inf))))) +
  geom_point(data = danioData, aes(x=TM2, y=(-log10(P.value)), size=1,
color=factor(cut(RMSD.1, c(0,2,3,5,Inf))))) +
  geom_point(data = flyData, aes(x=TM2, y=(-log10(P.value)), size=1,
color=factor(cut(RMSD.1, c(0,2,3,5,Inf))))) +
  labs(color="RMSD")+
  scale_color_brewer(palette="YlGn", labels = c("0-1", "2-3", "3-5", "5+"), direction=-1,
drop=FALSE) +
  new_scale_color() +
  new_scale_fill() +
  geom_label_repel(data = finalLabel, aes(label=Gene, fill=Proteome),
  #color = rep(c("green", "red", "yellow", "blue")[as.factor(finalLabel$Proteome)], times
= 2),
  seed = 2, box.padding = 1, nudge_x = 0, min.segment.length = 0, segment.size = 1,
segment.color="darkslategrey", max.overlaps = Inf)+ #Inf overlaps leads to issues
  scale_fill_manual(values = cols,
  labels = c("Mouse", "Human", "Danio", "Fly")) +

  guides(fill = guide_legend(override.aes = aes(color = NA))) +
  guides(size = "none") +

  theme(
    panel.background = element_blank(),
    panel.border = element_blank(),
    panel.grid.major = element_line(size = 0.1, color = "black", linetype = "dashed"),
    panel.grid.minor = element_blank(),
    axis.line = element_line(color="black"),

    plot.title = element_text(hjust = 0.5),
    legend.position = c(0.06, 0.75)
  )

setwd("/home/ian/homology_search/fcresults")
ggsave(filename = paste(protein, ".png", sep=""), plot = p, width = 8, height = 8)
}

```

---



```

#!/bin/bash
#Finalized by Ian Boys ~10.2022
#Merges FATCAT and TM-align search results for visualization and analysis in R
#Make sure to QC FATCAT files first to ensure that runs completed
#Requires FATCAT and TM-align search results in separate "FATCAT" and "TM" folders in root
directory
#Requires UNIPROT gene name/accession ID conversion lists under "IDs" in root directory
#Naming conventions are those used in FATCAT CHPC scripts and local TM-align scripts. Modify
below if required

#set up directories
#rootdir=$(pwd)
rootdir="$( cd -- "$(dirname "$0")" >/dev/null 2>&1 ; pwd -P )"
mkdir TM/TMconvert
mkdir res
mkdir final
mkdir final/converted
echo $rootdir

#remove "pound" and CPU time report from TMalign results
cd "$rootdir/TM"
for file in *.txt; do
    #sed -i '$ d' $file #remove the last line
    sed '1s/^./' $file > TMconvert/$file #get rid of the first character (#)
done
cd $rootdir

#rename FATCAT files to use same naming as TMalign
for fatfile in FATCAT/*.FATCAT.txt.scores.txt; do
    mv -- "$fatfile" "${fatfile%.FATCAT.txt.scores.txt}.txt"
done
cd $rootdir

#join FATCAT and TMalign files
for file in TM/TMconvert/*; do
    name=${file##*/}

    if [ -f "FATCAT/$name" ]; then
        paste "$file" "FATCAT/$name" > "res/$name"
    fi
done
cd $rootdir

```

```
#append gene names to existing tables
for file in res/*; do
    name=${file##*/}

    case $name in
        *"human"*)
            paste "IDs/humanIDs.tsv" "res/$name" > "final/$name";;
        *"drosophila"*)
            paste "IDs/flyIDs.tsv" "res/$name" > "final/$name";;
        *"danio"*)
            paste "IDs/danioIDs.tsv" "res/$name" > "final/$name";;
        *"mouse"*)
            paste "IDs/mouseIDs.tsv" "res/$name" > "final/$name";;

    esac
done

#removes "short match" (ie failed) TM-align results, as these interfere w/ downstream analysis
cd $rootdir/final
for file in *.txt; do
    grep -v "Short match" $file > converted/$file
done
```

---

```
#!/bin/bash
#check for expected last ID within fatcat file, echo problem files to log.txt

for file in *.txt; do
    name=${file##*/}

    case $name in
        *"human"*)
            if ! grep -q "X6R8D5" $file; then echo $file >> log.txt ; fi ;;
        *"drosophila"*)
            if ! grep -q "X4YX01" $file; then echo $file >> log.txt ; fi ;;
        *"danio"*)
            if ! grep -q "Z4YHZ5" $file; then echo $file >> log.txt ; fi ;;
        *"mouse"*)
            if ! grep -q "W8DXL4" $file; then echo $file >> log.txt ; fi ;;

    esac
done
```

---

```
#!/bin/bash

outfile="secondary_structures.txt"
numss=0

for FILE in *.pdb
do
    stride $FILE > $FILE.stride
done

for FILE in *.stride
do
    echo -n $FILE >> $outfile
    while read line
    do
        if [[ ${line:0:3} == 'LOC' ]]
        then
            ((numss++))
        fi
    done < $FILE
    echo -n " " >> $outfile
    echo $numss >> $outfile
    numss=0
done
```

---
